# Supplementary material
Source: PubMed Central journal article supplement (PMC2852535)

---

Supporting Information

**Mechanism of C–F Reductive Elimination from Palladium(IV)  
Fluorides**

Takeru Furuya, Diego Benitez, Ekaterina Tkatchouk, Alexandra E. Strom,  
Pingping Tang, William A. Goddard, III and Tobias Ritter\*

Department of Chemistry and Chemical Biology, Harvard University  
Cambridge, Massachusetts 02138

Materials and Process Simulation Center, California Institute of Technology  
Pasadena, California 91125

E-mail: [ritter@chemistry.harvard.edu](mailto:ritter@chemistry.harvard.edu)

## Table of Contents

|                                                                                                 |    |
|-------------------------------------------------------------------------------------------------|----|
| Materials and Methods.....                                                                      | 10 |
| Experimental Data .....                                                                         | 10 |
| Synthesis of palladium(IV) fluoride complexes <b>1–3</b> .....                                  | 10 |
| 2-(2-Pyridinyl)aniline ( <b>S1</b> ).....                                                       | 10 |
| 2-(2-Pyridinyl)-2-nitrobenzenesulfonamide ( <b>S2</b> ) .....                                   | 11 |
| Benzo[ <i>h</i> ]quinoliny palladium acetate dimer ( <b>S3</b> ).....                           | 12 |
| Benzo[ <i>h</i> ]quinoliny palladium(II) pyridine-sulfonamido complex <b>S4</b> .....           | 12 |
| Structure Assignment of Palladium(IV) fluoride complexes .....                                  | 13 |
| Monofluoro palladium(IV) complex <b>1</b> .....                                                 | 13 |
| Monofluoro palladium(IV) pyridine complex <b>2</b> .....                                        | 14 |
| Difluoro palladium(IV) complex <b>3</b> .....                                                   | 16 |
| Comparison of <sup>13</sup> C NMR chemical shift between <b>1</b> and <b>2</b> .....            | 18 |
| Line-shape analysis of complexes <b>1</b> and <b>2</b> .....                                    | 19 |
| Line-shape analysis of <b>1</b> .....                                                           | 19 |
| Line-shape analysis of <b>2</b> .....                                                           | 20 |
| Determination of equilibrium constant and rate of exchange between <b>1</b> and <b>2</b> .....  | 21 |
| Dependence of equilibrium constant on temperature.....                                          | 21 |
| Determination of $\Delta H^\circ$ , $\Delta S^\circ$ and $\Delta G^\circ$ .....                 | 22 |
| Determination of $\Delta H^\circ$ , $\Delta S^\circ$ and $\Delta G^\circ$ .....                 | 22 |
| Error analysis .....                                                                            | 22 |
| Eyring plot for rate of exchange .....                                                          | 22 |
| Error analysis of the Eyring plot.....                                                          | 23 |
| Isolation of Pd <sup>II</sup> product from C–F reductive elimination reaction of <b>1</b> ..... | 23 |
| Observation of <b>5</b> from C–F reductive elimination reaction of <b>1</b> .....               | 23 |
| Independent synthesis of cationic Pd <sup>II</sup> bispyridinium complex <b>5</b> .....         | 23 |
| Acetato palladium complex <b>S6</b> .....                                                       | 23 |
| Bis(pyridinium)palladium(II) tetrafluoroborate complex <b>5</b> .....                           | 24 |
| Determination of activation parameters.....                                                     | 25 |
| C–F reductive elimination from monofluoro Pd(IV) complex <b>1</b> .....                         | 25 |
| Kinetic data at 23.3 °C .....                                                                   | 25 |
| Kinetic data at 31.7 °C .....                                                                   | 26 |
| Kinetic data at 40.0 °C .....                                                                   | 26 |

---

|                                                                                        |    |
|----------------------------------------------------------------------------------------|----|
| Kinetic data at 50.6 °C .....                                                          | 27 |
| Kinetic data at 61.1 °C .....                                                          | 27 |
| Eyring plot .....                                                                      | 28 |
| Error analysis of the Eyring plot .....                                                | 28 |
| C–F reductive elimination from monofluoro Pd(IV) pyridine complex <b>2</b> .....       | 29 |
| Kinetic data at 27.9 °C .....                                                          | 29 |
| Kinetic data at 37.3 °C .....                                                          | 30 |
| Kinetic data at 47.0 °C .....                                                          | 30 |
| Kinetic data at 58.6 °C .....                                                          | 31 |
| Kinetic data at 65.0 °C .....                                                          | 31 |
| Eyring plot .....                                                                      | 32 |
| Error analysis of the Eyring plot .....                                                | 32 |
| Dependence on acetonitrile concentration .....                                         | 33 |
| Pd <sup>IV</sup> F vs MeCN concentration = 1:2298 .....                                | 33 |
| Pd <sup>IV</sup> F vs MeCN concentration = 1:1532 .....                                | 34 |
| Pd <sup>IV</sup> F vs MeCN concentration = 1:1149 .....                                | 34 |
| Pd <sup>IV</sup> F vs MeCN concentration = 1:766 .....                                 | 35 |
| Pd <sup>IV</sup> F vs MeCN concentration = 1:574 .....                                 | 35 |
| Pd <sup>IV</sup> F vs MeCN concentration = 1:460 .....                                 | 36 |
| Relationship of rate vs. pyridine concentration .....                                  | 36 |
| Dependence on pyridine concentration .....                                             | 37 |
| Kinetic data with 0 equiv of pyridine .....                                            | 38 |
| Kinetic data with 0.25 equiv of pyridine .....                                         | 38 |
| Kinetic data with 0.50 equiv of pyridine .....                                         | 39 |
| Kinetic data with 0.75 equiv of pyridine .....                                         | 39 |
| Kinetic data with 1.00 equiv of pyridine .....                                         | 40 |
| Relationship of rate vs pyridine concentrateion .....                                  | 40 |
| Rate dependence on <i>n</i> -Bu <sub>4</sub> NBF <sub>4</sub> .....                    | 41 |
| Kinetic data with 0 M of <i>n</i> -Bu <sub>4</sub> NBF <sub>4</sub> .....              | 42 |
| Kinetic data with 0.5 M of <i>n</i> -Bu <sub>4</sub> NBF <sub>4</sub> .....            | 42 |
| Kinetic data with 1.0 M of <i>n</i> -Bu <sub>4</sub> NBF <sub>4</sub> .....            | 43 |
| Kinetic data with 1.5 M of <i>n</i> -Bu <sub>4</sub> NBF <sub>4</sub> .....            | 43 |
| Kinetic data with 2.0 M of <i>n</i> -Bu <sub>4</sub> NBF <sub>4</sub> .....            | 44 |
| Relationship of rate vs <i>n</i> -Bu <sub>4</sub> NBF <sub>4</sub> concentration ..... | 44 |

|                                                                                               |    |
|-----------------------------------------------------------------------------------------------|----|
| Hammett plot for sulfonanilide substitution .....                                             | 45 |
| Synthesis of pyridinylsulfonanilide ligands with different sulfonanilide substitution.....    | 45 |
| 2-(2-Pyridinyl)-4-nitrobenzenesulfonanilide ( <b>S7</b> ) .....                               | 46 |
| 2-(2-Pyridinyl)-4-cyanobenzenesulfonanilide ( <b>S8</b> ) .....                               | 46 |
| 2-(2-Pyridinyl)-4-chlorobenzenesulfonanilide ( <b>S9</b> ).....                               | 46 |
| 2-(2-Pyridinyl)-4-fluorobenzenesulfonanilide ( <b>S10</b> ) .....                             | 47 |
| 2-(2-Pyridinyl)-4-phenylbenzenesulfonanilide ( <b>S11</b> ) .....                             | 47 |
| 2-(2-Pyridinyl)-4-benzenesulfonanilide ( <b>S12</b> ).....                                    | 48 |
| 2-(2-Pyridinyl)-4-toluenesulfonanilide ( <b>S13</b> ) .....                                   | 48 |
| 2-(2-Pyridinyl)-4- <i>tert</i> -butylbenzenesulfonanilide ( <b>S14</b> ).....                 | 48 |
| Synthesis of Pd(II) complexes with different sulfonanilide substitution .....                 | 49 |
| 4-Nitrobenzenesulfonanilido palladium(II) complex <b>S15</b> .....                            | 49 |
| 4-Cyanobenzenesulfonanilido palladium(II) complex <b>S16</b> .....                            | 50 |
| 4-Chlorobenzenesulfonanilido palladium(II) complex <b>S17</b> .....                           | 50 |
| 4-Fluorobenzenesulfonanilido palladium(II) complex <b>S18</b> .....                           | 51 |
| 4-Phenylbenzenesulfonanilido palladium(II) complex <b>S19</b> .....                           | 51 |
| Benzenesulfonanilido palladium(II) complex <b>S20</b> .....                                   | 52 |
| 4-Toluenesulfonanilido palladium(II) complex <b>S21</b> .....                                 | 52 |
| 4- <i>tert</i> -Butylbenzenesulfonanilido palladium(II) complex <b>S22</b> .....              | 53 |
| Synthesis of monofluoro Pd(IV) complexes with different sulfonanilide substitution.....       | 53 |
| 4-Nitrobenzenesulfonanilido palladium(IV) complex <b>6a</b> .....                             | 54 |
| 4-Cyanobenzenesulfonanilido palladium(IV) complex <b>6b</b> .....                             | 54 |
| 4-Chlorobenzenesulfonanilido palladium(IV) complex <b>6c</b> .....                            | 55 |
| 4-Fluorobenzenesulfonanilido palladium(IV) complex <b>6d</b> .....                            | 55 |
| 4-Phenylbenzenesulfonanilido palladium(IV) complex <b>6e</b> .....                            | 56 |
| Benzenesulfonanilido palladium(IV) complex <b>6f</b> .....                                    | 56 |
| 4-Toluenesulfonanilido palladium(IV) complex <b>6g</b> .....                                  | 57 |
| 4- <i>tert</i> -Butylbenzenesulfonanilido palladium(IV) complex <b>6h</b> .....               | 57 |
| Kinetic experiment of C–F reductive elimination from monofluoro palladium(IV) complexes ..... | 58 |
| R = NO <sub>2</sub> .....                                                                     | 58 |
| R = CN .....                                                                                  | 59 |
| R = Cl.....                                                                                   | 59 |
| R = F .....                                                                                   | 60 |
| R = Ph .....                                                                                  | 60 |

|                                                                                             |    |
|---------------------------------------------------------------------------------------------|----|
| R = H.....                                                                                  | 61 |
| R = Me .....                                                                                | 61 |
| R = <i>t</i> -Bu .....                                                                      | 62 |
| Hammett plot for pyridine substitution.....                                                 | 63 |
| Synthesis of pyridinylsulfonanilide ligands with different pyridine substitution .....      | 63 |
| 2-(2-(4-trifluoromethylpyridinyl)aniline ( <b>S23</b> )).....                               | 63 |
| Methyl 2-(2-(aminophenyl)pyridine-4-carboxylate ( <b>S24</b> )) .....                       | 64 |
| 2-(2-(4-bromopyridinyl)aniline ( <b>S25</b> )).....                                         | 64 |
| 2-(2-(4-methylpyridinyl)aniline ( <b>S26</b> )).....                                        | 64 |
| 2-(2-(4-methoxypyridinyl)aniline ( <b>S27</b> )) .....                                      | 65 |
| Synthesis of pyridinylsulfonanilide ligands with different pyridine substitution .....      | 65 |
| 2-(2-(4-trifluoromethylpyridinyl)-2-nitrobenzenesulfonanilide ( <b>S28</b> )).....          | 66 |
| Methyl 2-(2-(2-nitrobenzenesulfonylamidophenyl)pyridine-4-carboxylate ( <b>S29</b> )) ..... | 66 |
| 2-(2-(4-bromopyridinyl)-2-nitrobenzenesulfonanilide ( <b>S30</b> )).....                    | 66 |
| 2-(2-(4-methylpyridinyl)-2-nitrobenzenesulfonanilide ( <b>S31</b> )).....                   | 67 |
| 2-(2-(4-methoxypyridinyl)-2-nitrobenzenesulfonanilide ( <b>S32</b> )).....                  | 67 |
| Synthesis of Pd(II) complexes with different pyridine substitution.....                     | 68 |
| 4-Trifluoromethylpyridinyl palladium(II) complex <b>S33</b> .....                           | 68 |
| 4-Methoxycarbonylpyridinyl palladium(II) complex <b>S34</b> .....                           | 69 |
| 4-Bromopyridinyl palladium(II) complex <b>S35</b> .....                                     | 69 |
| 4-Methylpyridinyl palladium(II) complex <b>S36</b> .....                                    | 69 |
| 4-Methoxypyridinyl palladium(II) complex <b>S37</b> .....                                   | 70 |
| Synthesis of monofluoro Pd(IV) complexes with different pyridine substitution .....         | 70 |
| 4-Trifluoromethylpyridinyl palladium(IV) complex <b>7a</b> .....                            | 71 |
| 4-Methoxycarbonylpyridinyl palladium(IV) complex <b>7b</b> .....                            | 71 |
| 4-Bromopyridinyl palladium(II) complex <b>7c</b> .....                                      | 72 |
| 4-Methylpyridinyl palladium(II) complex <b>7e</b> .....                                     | 72 |
| 4-Methoxypyridinyl palladium(II) complex <b>7f</b> .....                                    | 73 |
| Kinetic experiment of C–F reductive elimination from monofluoro Pd(IV) complexes.....       | 73 |
| R = CF <sub>3</sub> .....                                                                   | 74 |
| R = CO <sub>2</sub> Me .....                                                                | 74 |
| R = Br.....                                                                                 | 75 |
| R = H.....                                                                                  | 75 |
| R = Me .....                                                                                | 76 |

|                                                                                                       |    |
|-------------------------------------------------------------------------------------------------------|----|
| R = OMe .....                                                                                         | 76 |
| Hammett plot for benzo[ <i>h</i> ]quinoline substitution .....                                        | 77 |
| Synthesis of substituted benzo[ <i>h</i> ]quinolines .....                                            | 77 |
| 7-Nitrobenzo[ <i>h</i> ]quinoline ( <b>S38</b> ) .....                                                | 77 |
| 7-Aminobenzo[ <i>h</i> ]quinoline ( <b>S39</b> ) .....                                                | 78 |
| 7-Chlorobenzo[ <i>h</i> ]quinoline ( <b>S40</b> ) .....                                               | 78 |
| 7-Cyanobenzo[ <i>h</i> ]quinoline ( <b>S41</b> ) .....                                                | 79 |
| 7-Formylbenzo[ <i>h</i> ]quinoline ( <b>S42</b> ) .....                                               | 80 |
| 7-Hydroxybenzo[ <i>h</i> ]quinoline ( <b>S43</b> ) .....                                              | 80 |
| 7-Methoxybenzo[ <i>h</i> ]quinoline ( <b>S44</b> ) .....                                              | 81 |
| 7-Iodobenzo[ <i>h</i> ]quinoline ( <b>S45</b> ) .....                                                 | 81 |
| 7-Methylbenzo[ <i>h</i> ]quinoline ( <b>S46</b> ) .....                                               | 82 |
| Synthesis of Pd(II) complexes with different benzo[ <i>h</i> ]quinoline substitution .....            | 83 |
| 7-Nitrobenzo[ <i>h</i> ]quinolinyl palladium(II) complex <b>S47</b> .....                             | 83 |
| 7-Cyanobenzo[ <i>h</i> ]quinolinyl palladium(II) complex <b>S48</b> .....                             | 84 |
| 7-Formylbenzo[ <i>h</i> ]quinolinyl palladium(II) complex <b>S49</b> .....                            | 84 |
| 7-Chlorobenzo[ <i>h</i> ]quinolinyl palladium(II) complex <b>S50</b> .....                            | 85 |
| 7-Methylbenzo[ <i>h</i> ]quinolinyl palladium(II) complex <b>S51</b> .....                            | 85 |
| 7-Methoxybenzo[ <i>h</i> ]quinolinyl palladium(II) complex <b>S52</b> .....                           | 86 |
| Synthesis of monofluoro Pd(IV) complexes with different benzo[ <i>h</i> ]quinoline substitution ..... | 86 |
| 7-Nitrobenzo[ <i>h</i> ]quinolinyl palladium(IV) complex <b>8a</b> .....                              | 87 |
| 7-Cyanobenzo[ <i>h</i> ]quinolinyl palladium(IV) complex <b>8b</b> .....                              | 87 |
| 7-Formylbenzo[ <i>h</i> ]quinolinyl palladium(IV) complex <b>8c</b> .....                             | 88 |
| 7-Chlorobenzo[ <i>h</i> ]quinolinyl palladium(IV) complex <b>8d</b> .....                             | 88 |
| 7-Methylbenzo[ <i>h</i> ]quinolinyl palladium(IV) complex <b>8f</b> .....                             | 89 |
| 7-Methoxybenzo[ <i>h</i> ]quinolinyl palladium(IV) complex <b>8g</b> .....                            | 89 |
| Kinetic experiments of C–F reductive elimination from Pd(IV) complexes .....                          | 90 |
| R = NO <sub>2</sub> .....                                                                             | 90 |
| R = CN .....                                                                                          | 91 |
| R = CHO .....                                                                                         | 91 |
| R = Cl .....                                                                                          | 92 |
| R = H .....                                                                                           | 92 |
| R = Me .....                                                                                          | 93 |
| R = OMe .....                                                                                         | 93 |

|                                                                                                                                             |     |
|---------------------------------------------------------------------------------------------------------------------------------------------|-----|
| Synthesis of monofluoro Pd(IV) pyridine complexes with different benzo[ <i>h</i> ]quinoline substitution ....                               | 94  |
| 7-Nitrobenzo[ <i>h</i> ]quinolinyl palladium(IV) pyridine complex <b>9a</b> .....                                                           | 95  |
| 7-Cyanobenzo[ <i>h</i> ]quinolinyl palladium(IV) pyridine complex <b>9b</b> .....                                                           | 95  |
| 7-Formylbenzo[ <i>h</i> ]quinolinyl palladium(IV) pyridine complex <b>9c</b> .....                                                          | 96  |
| 7-Chlorobenzo[ <i>h</i> ]quinolinyl palladium(IV) pyridine complex <b>9d</b> .....                                                          | 96  |
| 7-Methylbenzo[ <i>h</i> ]quinolinyl palladium(IV) pyridine complex <b>9f</b> .....                                                          | 97  |
| 7-Methoxybenzo[ <i>h</i> ]quinolinyl palladium(IV) pyridine complex <b>9g</b> .....                                                         | 97  |
| Kinetic experiments of C–F reductive elimination from Pd(IV) pyridine complexes with different benzo[ <i>h</i> ]quinoline substitution..... | 98  |
| R = NO <sub>2</sub> .....                                                                                                                   | 98  |
| R = CN .....                                                                                                                                | 99  |
| R = CHO .....                                                                                                                               | 99  |
| R = Cl.....                                                                                                                                 | 100 |
| R = H.....                                                                                                                                  | 100 |
| R = Me .....                                                                                                                                | 101 |
| R = OMe .....                                                                                                                               | 101 |
| Synthesis of substituted 10-fluorobenzo[ <i>h</i> ]quinolines.....                                                                          | 102 |
| 7-Nitro-10-fluorobenzo[ <i>h</i> ]quinoline ( <b>S53</b> ) .....                                                                            | 103 |
| 7-Chloro-10-fluorobenzo[ <i>h</i> ]quinoline ( <b>S54</b> ).....                                                                            | 103 |
| 7-Cyano-10-fluorobenzo[ <i>h</i> ]quinoline ( <b>S55</b> ) .....                                                                            | 104 |
| 7-Formyl-10-fluorobenzo[ <i>h</i> ]quinoline ( <b>S56</b> ).....                                                                            | 104 |
| 7-Methyl-10-fluorobenzo[ <i>h</i> ]quinoline ( <b>S57</b> ) .....                                                                           | 104 |
| 7-Methoxy-10-fluorobenzo[ <i>h</i> ]quinoline ( <b>S58</b> ) .....                                                                          | 105 |
| Synthesis of Pd(II) complexes with mixed ligands.....                                                                                       | 105 |
| 7-Nitrobenzoquinolinyl-benzenesulfonanilido palladium(II) complex ( <b>S59</b> ).....                                                       | 105 |
| 7-Nitrobenzoquinolinyl-4- <i>tert</i> -butylbenzenesulfonanilido palladium(II) complex ( <b>S60</b> ) .....                                 | 106 |
| 7-Nitrobenzoquinolinyl-4-methylpyridylsulfonanilido palladium(II) complex ( <b>S61</b> ).....                                               | 107 |
| Synthesis of Pd(IV) complexes with mixed ligands .....                                                                                      | 107 |
| 7-Nitrobenzoquinolinyl-benzenesulfonanilido palladium(IV) complex ( <b>S62</b> ) .....                                                      | 107 |
| 7-Nitrobenzoquinolinyl-4- <i>tert</i> -butylbenzenesulfonanilido palladium(IV) complex ( <b>S63</b> ).....                                  | 108 |
| 7-Nitrobenzoquinolinyl-4-methylpyridylsulfonanilido palladium(IV) complex ( <b>S64</b> ) .....                                              | 108 |
| Kinetic experiments of C–F reductive elimination from Pd(IV) complexes with mixed ligands .....                                             | 109 |
| Kinetic data of <b>S62</b> .....                                                                                                            | 110 |
| Kinetic data of <b>S63</b> .....                                                                                                            | 110 |

|                                                                                                                                        |     |
|----------------------------------------------------------------------------------------------------------------------------------------|-----|
| Kinetic data of <b>S64</b> .....                                                                                                       | 111 |
| Dependence on pyridine concentration for 7-nitrobenzoquinolynyl Pd(IV) fluoride complex <b>9a</b> .....                                | 112 |
| Kinetic data with 0 equiv of pyridine.....                                                                                             | 112 |
| Kinetic data with 0.25 equiv of pyridine.....                                                                                          | 113 |
| Kinetic data with 0.50 equiv of pyridine.....                                                                                          | 113 |
| Kinetic data with 0.75 equiv of pyridine.....                                                                                          | 114 |
| Kinetic data with 1.00 equiv of pyridine.....                                                                                          | 114 |
| Relationship of rate vs pyridine concentration.....                                                                                    | 115 |
| Dependence on pyridine concentration for 7-methoxybenzoquinolynyl Pd(IV) fluoride complex <b>9g</b> ..                                 | 115 |
| Kinetic data with 0 equiv of pyridine.....                                                                                             | 116 |
| Kinetic data with 0.25 equiv of pyridine.....                                                                                          | 116 |
| Kinetic data with 0.50 equiv of pyridine.....                                                                                          | 117 |
| Kinetic data with 0.75 equiv of pyridine.....                                                                                          | 117 |
| Kinetic data with 1.00 equiv of pyridine.....                                                                                          | 118 |
| Relationship of rate vs pyridine concentration.....                                                                                    | 118 |
| Model of reductive elimination from <b>2</b> .....                                                                                     | 119 |
| C–F Reductive elimination from difluoro Pd(IV) complex <b>3</b> .....                                                                  | 120 |
| Independent synthesis of monofluoro Pd(II) complex <b>11</b> .....                                                                     | 121 |
| Iodo palladium(II) complex <b>12</b> .....                                                                                             | 121 |
| Fluoro palladium(II) complex <b>11</b> .....                                                                                           | 121 |
| Temperature and solvent dependency of C–F reductive elimination from <b>3</b> .....                                                    | 122 |
| Kinetic experiments for C–F reductive elimination from <b>3</b> .....                                                                  | 122 |
| Model of autocatalytic reactions .....                                                                                                 | 123 |
| Analysis of typical Pd–N (pyridine) bond lengths.....                                                                                  | 124 |
| X-ray Crystallographic Analysis.....                                                                                                   | 125 |
| Difluoro Pd(IV) complex <b>3</b> (CCDC 686490) .....                                                                                   | 125 |
| Experimental .....                                                                                                                     | 125 |
| Monofluoro Pd(II) complex <b>11</b> (CCDC749260).....                                                                                  | 146 |
| Experimental .....                                                                                                                     | 146 |
| Computational Method Details .....                                                                                                     | 161 |
| Structural Validation for <b>3</b> . Calculated structure is overlaid in yellow.....                                                   | 162 |
| Natural charges for transition states.....                                                                                             | 162 |
| Selected metrical parameters of calculated structures .....                                                                            | 163 |
| Electrostatic potential (blue is $\delta^+$ , red is $\delta^-$ ) and highest occupied molecular orbital for <b>1</b> and <b>1*</b> .. | 165 |



---

|                                                       |     |
|-------------------------------------------------------|-----|
| XYZ coordinates from M06 geometry optimizations ..... | 166 |
| Spectroscopic Data.....                               | 201 |

## Materials and Methods

All reactions were carried out under an inert nitrogen atmosphere unless otherwise indicated. Solvents other than methanol were dried by passage through alumina<sup>1</sup>. Except as indicated otherwise, reactions were magnetically stirred and monitored by thin layer chromatography (TLC) using EMD TLC plates pre-coated with 250  $\mu\text{m}$  thickness silica gel 60 F254 plates and visualized by fluorescence quenching under UV light. In addition, TLC plates were stained using ceric ammonium molybdate or potassium permanganate stain. Flash chromatography was performed on Dynamic Adsorbents Silica Gel 40–63  $\mu\text{m}$  particle size using a forced flow of eluent at 0.3–0.5 bar pressure.<sup>2</sup> Concentration under reduced pressure was performed by rotary evaporation at 25–30  $^{\circ}\text{C}$  at appropriate pressure. Purified compounds were further dried under high vacuum (0.01–0.05 Torr). NMR spectra were recorded on a Varian Mercury 400 (400 MHz for  $^1\text{H}$ , 100 MHz for  $^{13}\text{C}$ , 375 MHz for  $^{19}\text{F}$ , and 126 MHz for  $^{31}\text{P}$  acquisitions), Unity/Inova 500 (500 MHz for  $^1\text{H}$ , 125 MHz for  $^{13}\text{C}$  acquisitions), or Unity/Inova 600 (600 MHz for  $^1\text{H}$  acquisitions) spectrometer.  $^{13}\text{C}$  NMR spectra were recorded  $^1\text{H}$  decoupled.  $^{19}\text{F}$  NMR spectra were recorded  $^1\text{H}$  coupled. Chemical shifts are reported in ppm with the solvent resonance as the internal standard. Data are reported as follows: s = singlet, d = doublet, t = triplet, q = quartet, h = heptet, m = multiplet, br = broad; coupling constants in Hz; integration. High-resolution mass spectra were obtained on Jeol AX-505 or SX-102 spectrometers at the Harvard University Mass Spectrometry Facilities. Chemicals were purchased from Aldrich, Alfa Aesar, Frontier Scientific, Matrix Scientific, or Boron Molecular and used as received. NMR spectroscopic data of known compounds correspond to the data given in the appropriate references.

## Experimental Data

### Synthesis of palladium(IV) fluoride complexes 1–3

#### 2-(2-Pyridinyl)aniline (S1)

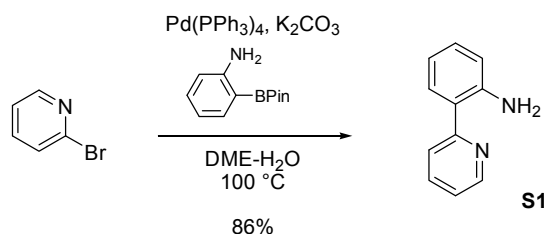

<sup>1</sup> Pangborn, A. B.; Giardello, M. A.; Grubbs, R. H.; Rosen, R. K.; Timmers, F. J. *Organometallics* **1996**, *15*, 1518–1520.

<sup>2</sup> Still, W. C.; Kahn, M.; Mitra, A. *J. Org. Chem.* **1978**, *43*, 2925–2927.

Under air, to 2-bromopyridine (4.54 g, 28.7 mmol, 1.00 equiv) in DME–H<sub>2</sub>O (1:1, 100 mL) at 23 °C was added K<sub>2</sub>CO<sub>3</sub> (5.96 g, 43.1 mmol, 1.50 equiv), 2-aminophenylboronic acid pinacol ester (6.30 g, 28.7 mmol, 1.00 equiv), and tetrakis(triphenylphosphine)palladium (1.66 g, 1.44 mmol, 5.00 mol%). The reaction mixture was stirred at 100 °C for 3.0 h. After cooling to 23 °C, the phases were separated and the aqueous phase was extracted with EtOAc (3 × 50 mL). The combined organic phases were washed with brine (100 mL) and dried (Na<sub>2</sub>SO<sub>4</sub>). The filtrate was concentrated in vacuo and the residue was purified by chromatography on silica gel eluting with hexanes/EtOAc 4:1 (v/v) to afford 4.20 g of the title compound as a red-brown oil (86% yield).

R<sub>f</sub> = 0.38 (hexanes/EtOAc 3:1 (v/v)). NMR Spectroscopy: <sup>1</sup>H NMR (500 MHz, CDCl<sub>3</sub>, 23 °C, δ): 8.61–8.60 (m, 1H), 7.78–7.75 (m, 1H), 7.65 (d, *J* = 7.9 Hz, 1H), 7.51 (dd, *J* = 7.6 Hz, 1.4 Hz, 1H), 7.19–7.16 (m, 2H), 6.80–6.76 (m, 2H), 5.72 (br s, 2H). <sup>13</sup>C NMR (125 MHz, CDCl<sub>3</sub>, 23 °C, δ): 159.5, 147.9, 146.6, 136.9, 129.9, 129.4, 122.2, 122.2, 121.0, 117.6, 117.2.<sup>3</sup>

### 2-(2-Pyridinyl)-2-nitrobenzenesulfonamide (S2)

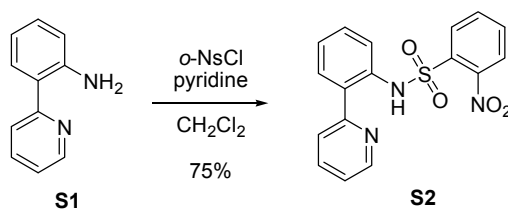

To 2-(2-pyridinyl)aniline (**S1**) (851 mg, 5.00 mmol, 1.00 equiv) in CH<sub>2</sub>Cl<sub>2</sub> (10 mL) at 0 °C was added pyridine (1.60 mL, 20.0 mmol, 4.00 equiv) and 2-nitrobenzenesulfonyl chloride (2.20 g, 10.0 mmol, 2.00 equiv). The reaction mixture was warmed to 23 °C and stirred for 2.0 hr before the addition of water (10 mL). The phases were separated and the aqueous layer was extracted with CH<sub>2</sub>Cl<sub>2</sub> (3 × 8 mL). The combined organic phases were washed with brine (30 mL) and dried (Na<sub>2</sub>SO<sub>4</sub>). The filtrate was concentrated in vacuo and the residue was purified by chromatography on silica gel eluting with hexanes/EtOAc 3:7 (v/v) to afford 1.33 g of the title compound as a pale-yellow solid (75% yield).

R<sub>f</sub> = 0.12 (hexanes/EtOAc 7:3 (v/v)). Melting Point: 91–94 °C. NMR Spectroscopy: <sup>1</sup>H NMR (500 MHz, CDCl<sub>3</sub>, 23 °C, δ): 8.73 (d, *J* = 5.0 Hz, 1H), 7.94 (dd, *J* = 7.5 Hz, 2.0 Hz, 1H), 7.82 (dd, *J* = 8.0 Hz, 1.0 Hz, 1H), 7.74 (ddd, *J* = 7.5 Hz, 7.5 Hz, 2.0 Hz, 1H), 7.63–7.52 (m, 5H), 7.38 (ddd, *J* = 7.5 Hz, 7.5 Hz, 1.5 Hz, 1H), 7.27–7.24 (m, 1H), 7.18 (ddd, *J* = 7.5 Hz, 7.5 Hz, 1.0 Hz, 1H). <sup>13</sup>C NMR (125 MHz, CDCl<sub>3</sub>, 23 °C, δ): 156.9, 156.2, 148.0, 137.9, 136.4, 133.6, 132.2, 131.0, 130.0, 129.0, 127.1, 125.0, 124.7, 122.4, 121.9, 121.9, 110.9. Mass Spectrometry: HRMS-FIA (m/z): Calcd for [C<sub>17</sub>H<sub>13</sub>N<sub>3</sub>O<sub>4</sub>S + H], 356.06995. Found, 356.07008.<sup>3</sup>

<sup>3</sup> Furuya, T.; Ritter, T. *J. Am. Chem. Soc.* **2008**, *130*, 10060–10061.

**Benzo[*h*]quinolinyll palladium acetate dimer (S3)**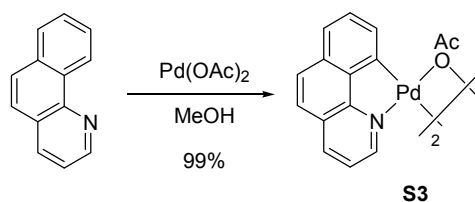

To benzo[*h*]quinoline (1.79 g, 10.0 mmol, 1.00 equiv) in MeOH (100 mL) at 23 °C was added palladium acetate (2.25 g, 10.0 mmol, 1.00 equiv). After stirring for 17 h, the suspension was filtered off and washed with MeOH (50 mL) and Et<sub>2</sub>O (50 mL) to afford 3.19 g of the title compound as a yellow solid (99% yield).

NMR Spectroscopy: <sup>1</sup>H NMR (500 MHz, CDCl<sub>3</sub>, 23 °C, δ): 7.80 (dd, *J* = 5.5 Hz, 1.5 Hz, 1H), 7.43 (dd, *J* = 8.0 Hz, 1.5 Hz, 1H), 7.24–7.18 (m, 3H), 7.08 (dd, *J* = 7.0 Hz, *J* = 1.5 Hz, 1H), 6.97 (d, *J* = 9.0 Hz, 1H), 6.46 (dd, *J* = 7.5 Hz, 5.0 Hz, 1H), 2.38 (s, 3H). <sup>13</sup>C NMR (125 MHz, CDCl<sub>3</sub>, 23 °C, δ): 182.5, 153.2, 148.9, 148.8, 140.0, 135.3, 132.4, 129.0, 127.9, 127.7, 125.0, 122.9, 122.1, 119.8, 25.2.<sup>3</sup>

**Benzo[*h*]quinolinyll palladium(II) pyridine-sulfonamido complex S4<sup>4</sup>**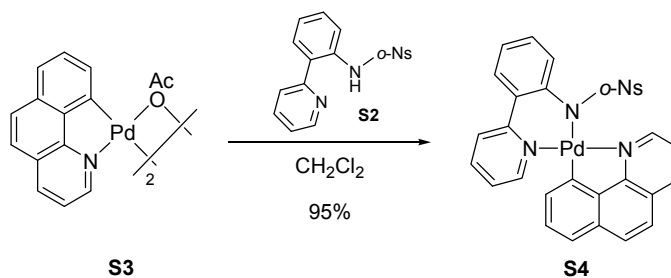

To benzo[*h*]quinolinyll palladium acetate dimer (**S3**) (342 mg, 0.500 mmol, 1.00 equiv) in CH<sub>2</sub>Cl<sub>2</sub> (1 mL) at 23 °C was added 2-(2-pyridinyl)phenyl-2-nitrobenzenesulfonamide (**S2**) (342 mg, 1.00 mmol, 2.00 equiv). After stirring for 20 min the reaction mixture was concentrated in vacuo. The resulting residue was triturated with Et<sub>2</sub>O (3 × 1 mL) to afford 606 mg of the title compound as a colorless solid (95% yield).

Melting Point: >260 °C (decomp.). NMR Spectroscopy: <sup>1</sup>H NMR (500 MHz, CDCl<sub>3</sub>, 23 °C, δ): 9.55 (dd,

<sup>4</sup> Compound **S4** and **11** are identical, but labeled like this for clarity.

$J = 5.5$  Hz, 1.5 Hz, 1H), 8.99 (dd,  $J = 5.5$  Hz, 1.0 Hz, 1H), 8.30 (dd,  $J = 8.5$  Hz, 1.5 Hz, 1H), 7.76–7.71 (m, 2H), 7.64–7.54 (m, 5H), 7.49 (ddd,  $J = 9.5$  Hz, 8.5 Hz, 1.5 Hz, 1H), 7.41 (dd,  $J = 7.5$  Hz, 1.5 Hz, 1H), 7.36 (dd,  $J = 8.0$  Hz, 8.0 Hz, 1H), 7.26–7.13 (m, 5H), 7.04 (dd,  $J = 8.0$  Hz, 1.5 Hz, 1H), 7.00 (d,  $J = 7.5$  Hz, 1H).  $^{13}\text{C}$  NMR (125 MHz,  $\text{CDCl}_3$ , 23 °C,  $\delta$ )<sup>5</sup>: 176.0, 174.7, 168.4, 162.3, 160.4, 158.3, 155.5, 154.3, 151.3, 144.2, 142.3, 138.4, 137.5, 136.4, 134.9, 132.0, 131.1, 130.4, 130.1, 129.3, 128.9, 128.4, 126.9, 124.8, 124.6, 123.8, 123.4, 123.3, 122.6, 122.0.<sup>3</sup>

## Structure Assignment of Palladium(IV) fluoride complexes

### Monofluoro palladium(IV) complex 1

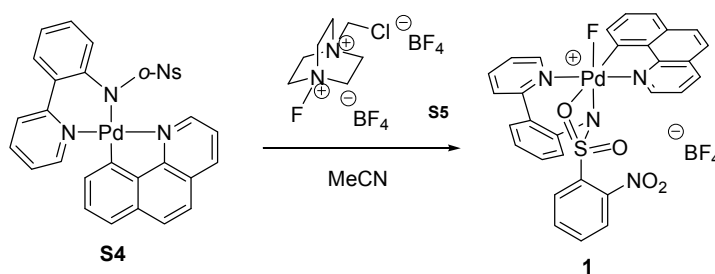

To benzo[*h*]quinolinyne palladium(II) pyridine-sulfonamido complex **S4** (12.8 mg, 0.0200 mmol, 1.00 equiv) in acetonitrile-*d*<sub>3</sub> (0.6 mL) at 23 °C was added 1-chloromethyl-4-fluoro-1,4-diazoniabicyclo[2.2.2]octane bis(tetrafluoroborate) (**S5**) (7.1 mg, 0.020 mmol, 1.0 equiv). After stirring for 10 min at 23 °C, the colorless suspension formed a dark purple solution. Compound **1** was characterized by NMR in acetonitrile solution without purification.

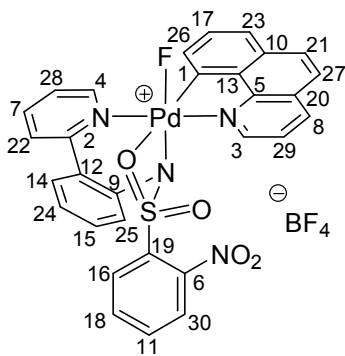

NMR Spectroscopy:  $^1\text{H}$  NMR (500 MHz, acetonitrile-*d*<sub>3</sub>, 23 °C,  $\delta$ )<sup>6</sup>: 9.60 (d,  $J = 6.0$  Hz, 1H, H-3), 9.46

<sup>5</sup> The  $^{13}\text{C}$  NMR spectrum of **S4** has a low signal-to-noise ratio due to the low solubility of **S4** in common organic solvents.

<sup>6</sup> The numbering scheme is based on the  $^{13}\text{C}$  chemical shifts, and is not IUPAC standard.

(d,  $J = 6.0$  Hz, 1H, H-4), 8.89 (dd,  $J = 8.0$  Hz, 1.0 Hz, 1H, H-8), 8.48 (dd,  $J = 7.5$  Hz, 7.5 Hz, 1H, H-7), 8.40 (d,  $J = 8.0$  Hz, 1H, H-22), 8.06 (d,  $J = 8.5$  Hz, 1H, H-27), 8.05 (dd,  $J = 8.5$  Hz, 6.0 Hz, 1H, H-29), 8.06 (d,  $J = 8.5$  Hz, 1H, H-21), 7.95 (dd,  $J = 7.0$  Hz, 6.5 Hz, 1H, H-28), 7.78 (d,  $J = 7.5$  Hz, 1H, H-14), 7.78 (d,  $J = 7.5$  Hz, 1H, H-23), 7.61 (ddd,  $J = 8.0$  Hz, 8.0 Hz, 1.0 Hz, 1H, H-11), 7.60 (d,  $J = 8.5$  Hz, 1H, H-16), 7.46 (d,  $J = 8.5$  Hz, 1H, H-30), 7.42 (dd,  $J = 7.0$  Hz, 7.0 Hz, 1H, H-18), 7.20 (dd,  $J = 7.5$  Hz, 7.5 Hz, 1H, H-24), 7.06 (dd,  $J = 8.0$  Hz, 8.0 Hz, 1H, H-17), 6.89 (dd,  $J = 8.0$  Hz, 7.5 Hz, 1H, H-15), 6.78 (d,  $J = 8.0$  Hz, 1H, H-25), 6.31 (d,  $J = 9.0$  Hz, 1H, H-26).  $^{13}\text{C}$  NMR (125 MHz, acetonitrile- $d_3$ , 23 °C,  $\delta$ ): 166.98 (s, C-1), 154.52 (s, C-2), 153.81 (s, C-3), 151.56 (d,  $J_{\text{C-F}} = 16.4$  Hz, C-4), 150.81 (s, C-5), 148.56 (s, C-6), 144.06 (s, C-7), 142.32 (s, C-8), 139.58 (s, C-9), 136.71 (s, C-10), 135.80 (s, C-11), 135.24 (s, C-12), 134.87 (s, C-13), 133.24 (s, C-14), 132.58 (s, C-15), 132.48 (s, C-16), 132.20 (s, C-17), 132.11 (s, C-18), 131.19 (s, C-19), 130.04 (s, C-20), 129.37 (s, C-21), 127.77 (s, C-22), 127.45 (s, C-23), 127.12 (s, C-24), 127.08 (s, C-25), 126.63 (s, C-26), 126.62 (s, C-27), 126.34 (d,  $J_{\text{C-F}} = 2.5$  Hz, C-28), 125.52 (s, C-29), 124.92 (s, C-30).  $^{19}\text{F}$  NMR (375 MHz, acetonitrile- $d_3$ , 23 °C,  $\delta$ ): -152.0 (s), -278.0 (br s).<sup>3</sup>

$^1\text{H}$ ,  $^{13}\text{C}$ ,  $^1\text{H}$ - $^1\text{H}$  COSY, HSQC, HMBC, NOESY spectra are attached in the spectroscopic data section.

The relative configuration was assigned as follows:

- 1) the nOe signal between H-26 and H-14 is most consistent with the above configuration of the two bidentate ligands
- 2) the lack of trans C-F coupling indicates the fluoride is not trans to C-1

### Monofluoro palladium(IV) pyridine complex **2**

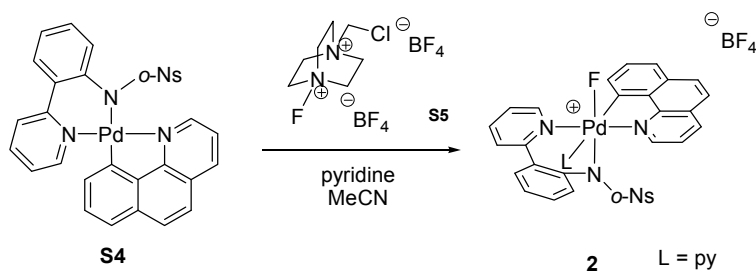

To benzo[*h*]quinolinyll palladium(II) pyrdine-sulfonamido complex **S4** (12.8 mg, 0.0200 mmol, 1.00 equiv) in acetonitrile- $d_3$  (0.6 mL) at 23 °C was added 1-chloromethyl-4-fluoro-1,4-diazoniabicyclo[2.2.2]octane bis(tetrafluoroborate) (**S5**) (7.1 mg, 0.020 mmol, 1.0 equiv). After stirring for 10 min at 23 °C, pyridine (2.1  $\mu\text{L}$ , 0.026 mmol, 1.3 equiv) was added to the reaction mixture. Compound **2** was characterized by NMR as acetonitrile solution without purification.

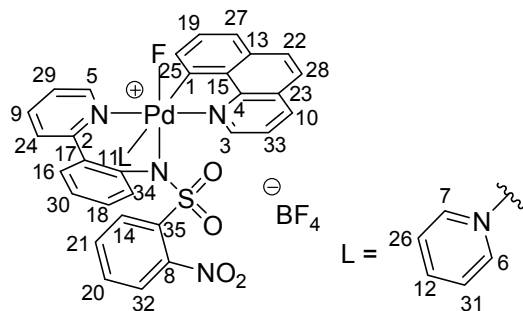

NMR Spectroscopy: <sup>1</sup>H NMR (500 MHz, acetonitrile-*d*<sub>3</sub>, 23 °C, δ)<sup>7</sup>: 9.34 (d, *J* = 5.5 Hz, 1H, H-7), 8.88 (d, *J* = 6.0 Hz, 1H, H-3), 8.75 (d, *J* = 8.0 Hz, 1H, H-10), 8.62 (d, *J* = 6.5 Hz, 1H, H-5), 8.58 (d, *J* = 8.0 Hz, 1H, H-24), 8.52 (d, *J* = 5.0 Hz, 1H, H-6), 8.38 (dd, *J* = 8.0 Hz, 8.0 Hz, 1H, H-9), 8.24 (dd, *J* = 8.5 Hz, 7.5 Hz, 1H, H-12), 8.03 (d, *J* = 9.0 Hz, 1H, H-22), 7.98 (d, *J* = 9.0 Hz, 1H, H-28), 7.98–7.96 (m, 1H, H-26), 7.86–7.81 (m, 3H, H-16, H-27, H-33), 7.60–7.53 (m, 3H, H-14, H-20, H-31), 7.49 (ddd, *J* = 8.0 Hz, 7.5 Hz, 1.5 Hz, 1H, H-29), 7.45 (dd, *J* = 7.5 Hz, 1.0 Hz, 1H, H-32), 7.32–7.26 (m, 1H, H-21), 7.21 (dd, *J* = 7.5 Hz, 7.5 Hz, 1H, H-30), 7.15 (dd, *J* = 8.0 Hz, 7.5 Hz, 1H, H-19), 6.89 (dd, *J* = 8.0 Hz, 8.0 Hz, 1H, H-18), 6.78 (d, *J* = 8.0 Hz, 1H, H-34), 6.42 (d, *J* = 8.0 Hz, 1H, H-25). <sup>13</sup>C NMR (125 MHz, acetonitrile-*d*<sub>3</sub>, –15 °C, δ): 164.89 (s, C-1), 154.31 (s, C-2), 153.42 (s, C-3), 152.20 (s, C-4), 150.59 (d, *J*<sub>C-F</sub> = 17.3 Hz, C-5), 150.30 (s, C-6), 148.69 (s, C-7), 148.67 (s, C-8), 143.65 (s, C-9), 142.12 (s, C-10), 141.37 (s, C-11), 141.24 (s, C-12), 136.18 (s, C-13), 135.47 (s, C-14), 134.95 (s, C-15), 133.89 (s, C-16), 133.33 (s, C-17), 132.37 (s, C-18), 132.05 (s, C-19), 131.88 (s, C-20), 130.85 (s, C-21), 129.63 (s, C-22), 129.56 (s, C-23), 128.27 (s, C-24), 127.93 (s, C-25), 127.65 (s, C-26), 126.91 (s, C-27), 126.20–126.04 (m, C-28, C-29, C-30, C-31), 125.64 (s, C-32), 125.33 (s, C-33), 124.74 (s, C-34), 124.28 (s, C-35). <sup>19</sup>F NMR (375 MHz, acetonitrile-*d*<sub>3</sub>, 23 °C, δ): –152.0 (s), –264.3 (br s).

<sup>1</sup>H, <sup>13</sup>C, <sup>1</sup>H-<sup>1</sup>H COSY, HSQC, HMBC, NOESY spectra were attached in the spectroscopic data section.

The relative configuration was assigned as follows:

- 1) the nOe signal between H-25 and H-16 is most consistent with the above configuration of the two bidentate ligands
- 2) the lack of trans C–F coupling indicates the fluoride is not trans to C-1

<sup>7</sup> The numbering scheme is based on the <sup>13</sup>C chemical shifts, and is not IUPAC standard.

Difluoro palladium(IV) complex **3**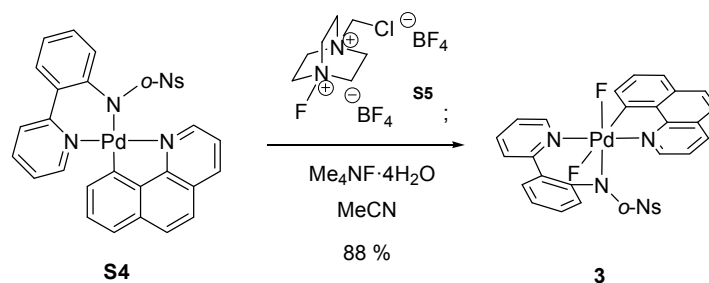

To benzo[*h*]quinolinyl palladium(II) pyridine-sulfonamido complex **S4** (128 mg, 0.200 mmol, 1.00 equiv) in MeCN (2.0 mL) at 23 °C was added 1-chloromethyl-4-fluoro-1,4-diazoniabicyclo[2.2.2]octane bis(tetrafluoroborate) (**S5**) (77.9 mg, 0.220 mmol, 1.10 equiv). After stirring for 10 min at 23 °C, tetramethylammonium fluoride tetrahydrate (72.6 mg, 0.440 mmol, 2.20 equiv) was added to the reaction mixture. After stirring for 20 min at 23 °C, the precipitate was filtered off and washed with acetone (5 × 2 mL). The solid was dissolved in CH<sub>2</sub>Cl<sub>2</sub> and filtered through a pad of celite. The filtrate was concentrated in vacuo to afford 119 mg of the title compound as an orange solid (88% yield).

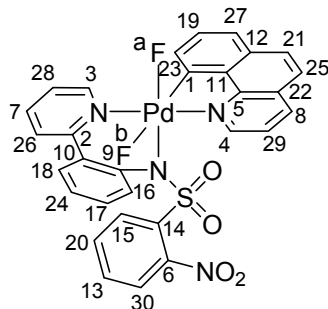

NMR Spectroscopy: <sup>1</sup>H NMR (500 MHz, DMSO-*d*<sub>6</sub>, 23 °C, δ)<sup>8</sup>: 9.72 (d, *J* = 5.0 Hz, 1H, H-4), 9.28 (d, *J* = 5.0 Hz, 1H, H-3), 9.18 (dd, *J*<sub>H-F</sub> = 17.5 Hz, *J*<sub>H-H</sub> = 8.0 Hz, 1H, H-15), 8.94 (d, *J* = 8.0 Hz, 1H, H-8), 8.20 (dd, *J* = 8.0 Hz, 8.0 Hz, 1H, H-7), 8.12 (dd, *J* = 8.0 Hz, 5.5 Hz, 1H, H-29), 8.07 (d, *J* = 9.0 Hz, 1H, H-25), 8.03 (d, *J* = 9.0 Hz, 1H, H-21), 7.89 (dd, *J* = 7.0 Hz, 7.0 Hz, 1H, H-28), 7.86 (d, *J* = 8.0 Hz, 1H, H-26), 7.75 (d, *J* = 7.5 Hz, 1H, H-18), 7.73 (d, *J* = 8.0 Hz, 1H, H-27), 7.44 (dd, *J* = 7.5 Hz, 7.5 Hz, 1H, H-13), 7.35 (d, *J* = 8.0 Hz, 1H, H-30), 7.31 (dd, *J* = 7.5 Hz, 7.5 Hz, 1H, H-24), 7.14 (dd, *J* = 8.0 Hz, 8.0 Hz, 1H, H-20), 7.07 (dd, *J* = 8.0 Hz, 7.5 Hz, 1H, H-19), 7.01 (dd, *J* = 7.5 Hz, 7.5 Hz, 1H, H-17), 6.36 (d, *J* = 8.0 Hz, 1H, H-16), 6.21 (dd, *J*<sub>H-H</sub> = 7.5 Hz, *J*<sub>H-F</sub> = 5.0 Hz, 1H, H-23). <sup>13</sup>C NMR (125 MHz, DMSO-*d*<sub>6</sub>, 23 °C, δ): 160.8 (d, *J* = 63 Hz, C-1), 152.8 (s, C-2), 152.0 (dd, *J* = 13.5 Hz, 6.3 Hz, C-3), 151.3 (d, *J* = 2.1 Hz, C-4), 151.0 (s, C-5), 148.3 (s, C-6), 142.9 (s, C-7), 141.0 (s, C-8), 139.6 (s, C-9), 136.7 (s, C-10), 135.3 (s, C-11), 135.0 (d, *J* = 3.6 Hz, C-12), 133.4 (s, C-13), 133.1 (s, C-14), 132.1 (d, *J* = 31 Hz, C-15), 131.9 (s,

<sup>8</sup> The numbering scheme is based on the <sup>13</sup>C chemical shifts, and is not IUPAC standard.



C-16), 131.7 (s, C-17), 131.4 (s, C-18), 131.0 (d,  $J = 6.4$  Hz, C-19), 130.9 (s, C-20), 129.2 (s, C-21), 128.7 (s, C-22), 127.7 (d,  $J = 3.6$  Hz, C-23), 127.5 (s, C-24), 125.5 (s, C-25), 125.4 (s, C-26), 125.4 (s, C-27), 125.2 (s, C-28), 124.1 (s, C-29), 122.6 (s, C-30).  $^{19}\text{F}$  NMR (375 MHz, DMSO-*d*<sub>6</sub>, 23 °C,  $\delta$ ): -169.2 (d,  $J = 113$  Hz 1F, F-b), -277.8 (d,  $J = 113$  Hz, 1F, F-a). Anal: calcd for C<sub>30</sub>H<sub>20</sub>F<sub>2</sub>N<sub>4</sub>O<sub>4</sub>PdS: C, 53.22; H, 2.98; N, 8.28; found: C, 53.17; H, 2.99; N, 8.17.

$^1\text{H}$ ,  $^{13}\text{C}$ ,  $^1\text{H}$ - $^1\text{H}$  COSY,  $^{19}\text{F}$ - $^{19}\text{F}$  COSY, HSQC, HMBC, NOESY, HOM2DJ spectra are attached in the spectroscopic data section. For the details of the crystal structure see the previous publication.<sup>3</sup>

The relative configuration was assigned as follows:

- 1) the C-F coupling between C-1 and F-b dictates F-b to be trans to C-1
- 2) in order to accommodate the bidentate pyridylsulfonamide ligand, F-a cannot be in the same plane as the benzoquinoline ligand
- 3) in order to explain the doublet of doublets in C-3, the pyridyl moiety needs to be trans to the benzoquinoline nitrogen ligand. Also the nOe signal between H-23 and H-18 is most consistent with the above configuration of the two bidentate ligands

## Comparison of $^{13}\text{C}$ NMR chemical shift between 1 and 2

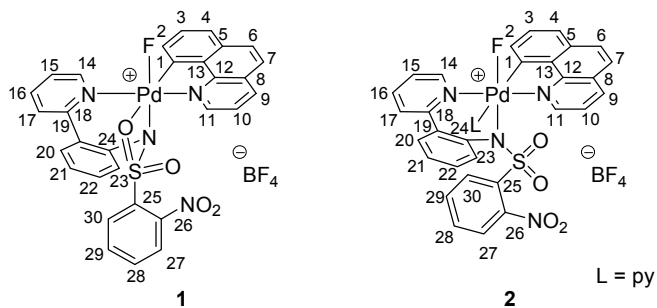

|            | 1            | 2            | $\Delta\delta$ |
|------------|--------------|--------------|----------------|
| C1         | 126.6        | 127.9        | 1.3            |
| C2         | 132.2        | 132.1        | 0.1            |
| C3         | 127.5        | 126.9        | 0.6            |
| C4         | 136.7        | 136.2        | 0.5            |
| C5         | 129.4        | 129.6        | 0.2            |
| C6         | 126.6        | 126.2        | 0.4            |
| C7         | 130.0        | 129.6        | 0.4            |
| C8         | 142.3        | 142.1        | 0.2            |
| C9         | 125.5        | 125.3        | 0.2            |
| C10        | 153.8        | 153.4        | 0.4            |
| C11        | 150.8        | 152.2        | 1.4            |
| C12        | 134.9        | 135.0        | 0.1            |
| C13        | 167.0        | 164.9        | 2.1            |
| C14        | 151.6        | 150.6        | 1.0            |
| C15        | 126.3        | 126.2        | 0.1            |
| C16        | 144.1        | 143.7        | 0.4            |
| C17        | 127.8        | 128.3        | 0.5            |
| C18        | 154.5        | 154.3        | 0.2            |
| C19        | 135.2        | 133.3        | 1.9            |
| C20        | 133.2        | 133.9        | 0.7            |
| C21        | 127.1        | 126.2        | 0.9            |
| C22        | 132.6        | 132.4        | 0.2            |
| C23        | 127.1        | 124.7        | 2.4            |
| C24        | 139.6        | 141.4        | 1.8            |
| <b>C25</b> | <b>131.2</b> | <b>124.3</b> | <b>6.9</b>     |
| C26        | 148.6        | 148.7        | 0.1            |
| C27        | 124.9        | 125.6        | 0.7            |
| C28        | 135.8        | 131.9        | 3.9            |
| C29        | 132.1        | 130.9        | 1.2            |
| C30        | 132.5        | 135.5        | 3.0            |
|            | AVERAGE:     |              | 1.1            |

## Line-shape analysis of complexes 1 and 2

### Line-shape analysis of 1

A Solution (16.7 mM) of compound **1** was prepared by reacting compound **S4** (6.4 mg, 0.010 mmol, 1.0 equiv) with 1-chloromethyl-4-fluoro-1,4-diazoniabicyclo [2.2.2]octane bis(tetrafluoroborate) (**S5**) (3.5 mg, 0.010 mmol, 1.0 equiv) in acetonitrile-*d*<sub>3</sub> (0.6 mL) in an NMR tube under nitrogen. <sup>1</sup>H NMR spectra were taken at -35, -25, -15, -5, 5, 15, 25 °C.

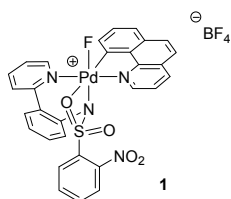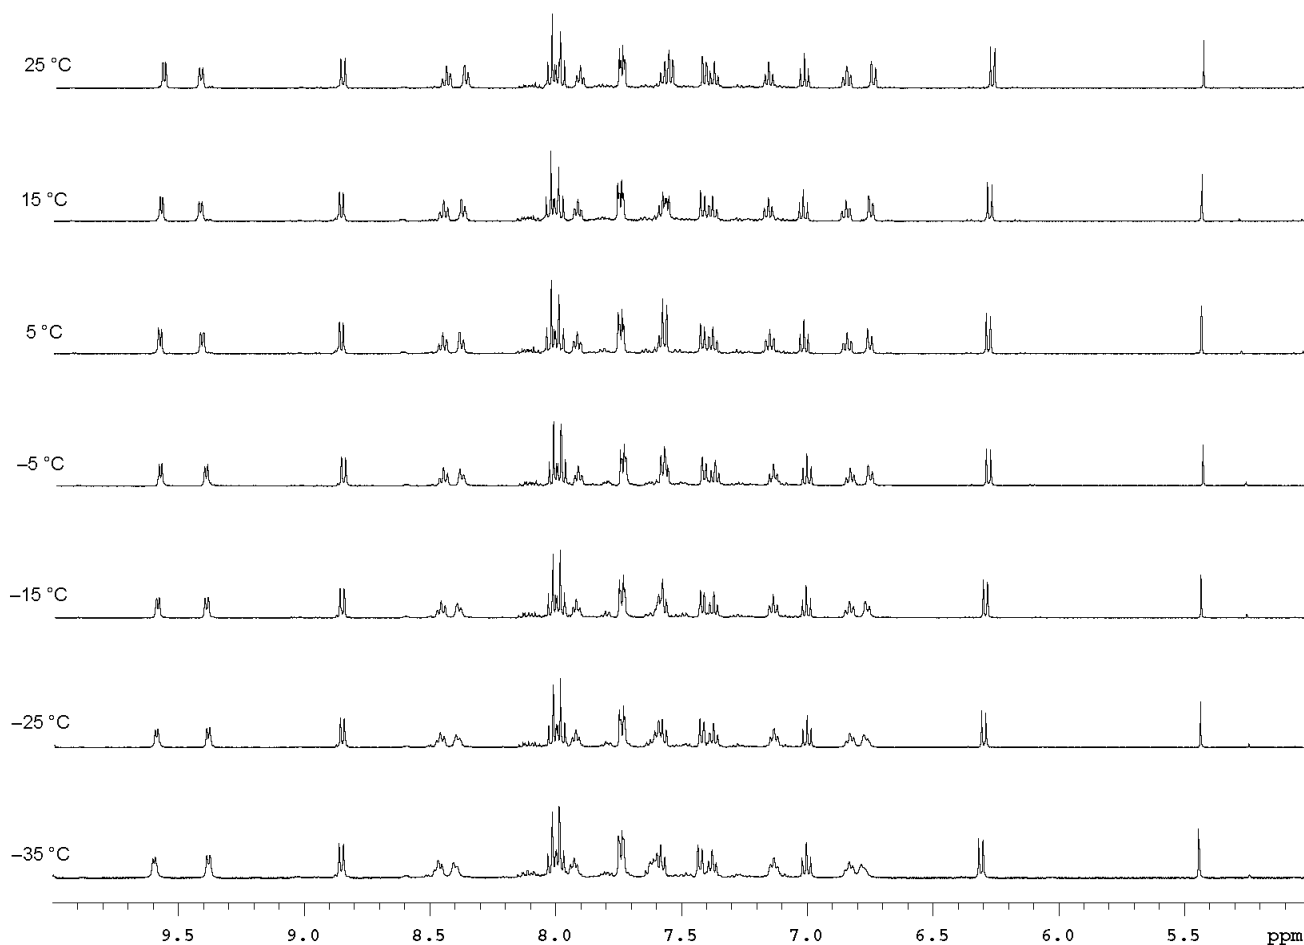

**Line-shape analysis of 2**

Solutions (16.7 mM) of compound **2** was prepared by reacting compound **S4** (6.4 mg, 0.010 mmol, 1.00 equiv) with 1-chloromethyl-4-fluoro-1,4-diazoniabicyclo [2.2.2]octane bis(tetrafluoroborate) (**S5**) (3.5 mg, 0.010 mmol, 1.0 equiv) and pyridine (1.2  $\mu$ L, 0.015 mmol, 1.5 equiv) in acetonitrile-*d*<sub>3</sub> (0.6 mL) in an NMR tube under nitrogen. <sup>1</sup>H NMR spectra were taken at -35, -25, -15, -5, 5, 15, 25 °C.

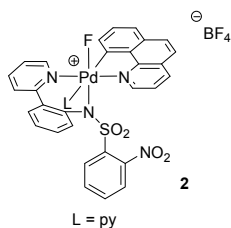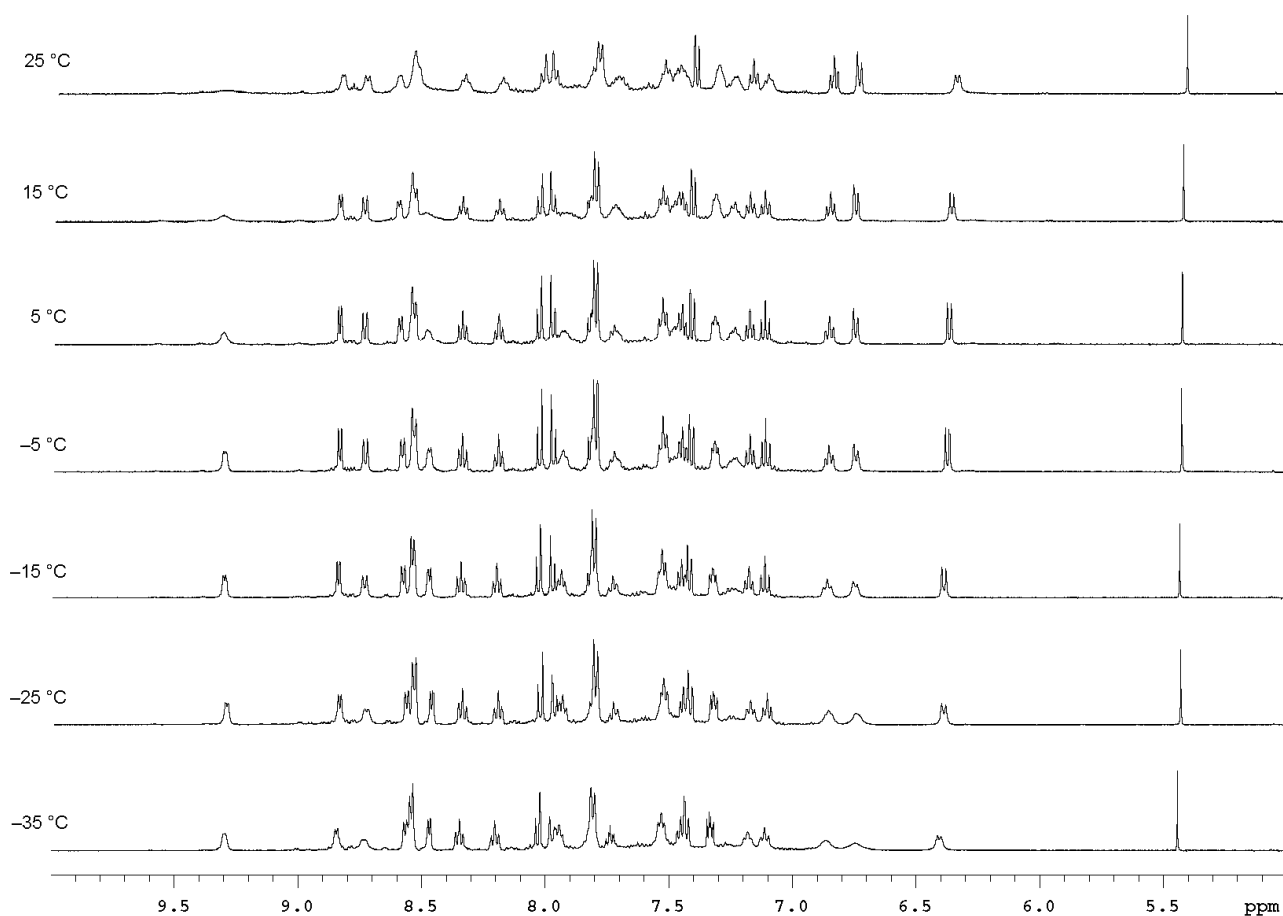

## Determination of equilibrium constant and rate of exchange between 1 and 2

### Dependence of equilibrium constant on temperature

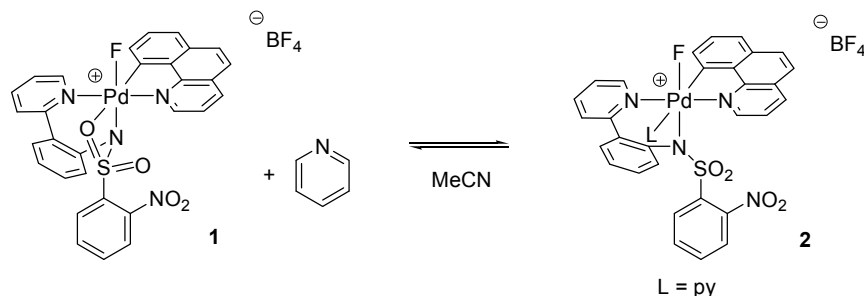

A solution of a mixture of compounds **1** and **2** was prepared by reacting compound **S4** (12.8 mg, 0.0200 mmol, 1.00 equiv) with 1-chloromethyl-4-fluoro-1,4-diazoniabicyclo [2.2.2]octane bis(tetrafluoroborate) (**S5**) (7.1 mg, 0.020 mmol, 1.0 equiv) and pyridine (1.6  $\mu$ L, 0.020 mmol, 1.0 equiv) in acetonitrile-*d*<sub>3</sub> in an NMR tube under nitrogen. The equilibrium constant was measured by integrating the peak at 6.42 ppm (complex **2**) and 6.31 ppm (complex **1**). Using the same sample, the rate of exchange was measured by line-shape analysis of the peak at 6.31 ppm. ( $k = \pi \cdot (\Delta\nu - \Delta\nu_{\text{ref}})$ ,<sup>9</sup> where  $\Delta\nu$  is a peak width at half height (6.31 ppm) and  $\Delta\nu_{\text{ref}}$  is a peak width at half height of non-exchangeable peak (4.91 ppm, 1-chloromethyl-1,4-diazoniabicyclo [2.2.2]octane (tetrafluoroborate))).  $\Delta\nu$  was not measured at 24.8 °C due to the merging of two peaks at 6.31 ppm and 6.42 ppm.  $\Delta\nu$  at -34.6 °C was not measured because line-broadening that does not correspond to the exchange between **1** and **2**, presumably due to the sluggish bond rotation at this temperature, was observed at -34.6 °C.

| T (°C) | 1/T(K <sup>-1</sup> ) | K <sub>eq</sub> | RlnK <sub>eq</sub><br>(cal·K <sup>-1</sup> ) | $\Delta\nu$ | $\Delta\nu_{\text{ref}}$ | k (s <sup>-1</sup> ) | Rln(kh/kbT)<br>(cal·K <sup>-1</sup> ·mol <sup>-1</sup> ) |
|--------|-----------------------|-----------------|----------------------------------------------|-------------|--------------------------|----------------------|----------------------------------------------------------|
| -34.6  | 0.0042                | 17.2            | 5.65                                         | —           | —                        | —                    | —                                                        |
| -23.7  | 0.00401               | 11.9            | 4.92                                         | 1.78        | 1.65                     | 0.393                | -60                                                      |
| -13.2  | 0.00385               | 7.56            | 4.02                                         | 1.97        | 1.52                     | 1.41                 | -57.6                                                    |
| -1.31  | 0.00368               | 5.43            | 3.36                                         | 2.87        | 1.47                     | 4.4                  | -55.4                                                    |
| 11.1   | 0.00352               | 3.89            | 2.7                                          | 6.3         | 1.69                     | 14.5                 | -53.1                                                    |
| 24.8   | 0.00336               | 2.61            | 1.91                                         | —           | —                        | —                    | —                                                        |

<sup>9</sup> Sandstrom, J. *Dynamic NMR spectroscopy*, London: New York, 1982.

### Determination of $\Delta H^\circ$ , $\Delta S^\circ$ and $\Delta G^\circ$

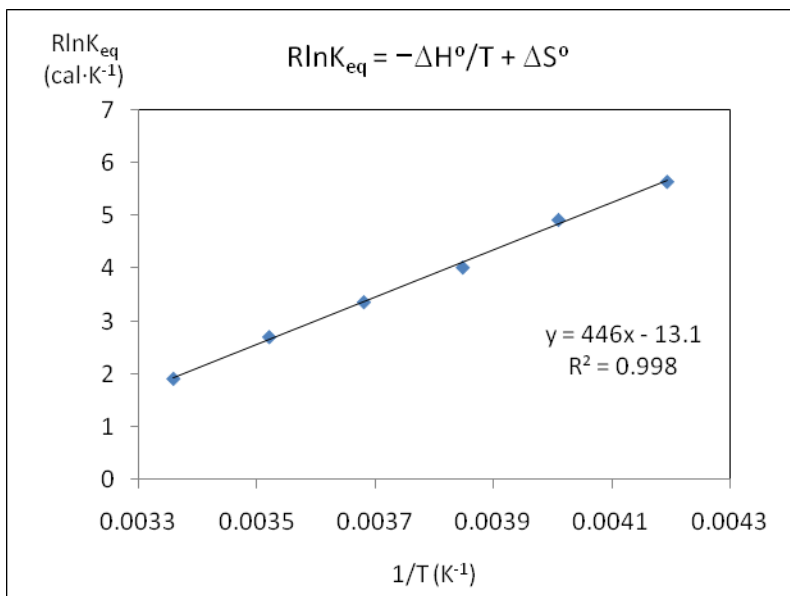

### Error analysis

|               | $\Delta H^\circ$<br>(kcal·mol <sup>-1</sup> ) | Difference | $\Delta S^\circ$<br>(cal·K <sup>-1</sup> ·mol <sup>-1</sup> ) | Difference | $\Delta G_{298}^\circ$<br>(kcal·mol <sup>-1</sup> ) | Difference |
|---------------|-----------------------------------------------|------------|---------------------------------------------------------------|------------|-----------------------------------------------------|------------|
| calcd + error | -4.74                                         | -0.28      | -12.02                                                        | -1.05      | 0.605                                               | 0.03       |
| calcd         | -4.46                                         | -          | -13.07                                                        | -          | 0.570                                               | -          |
| calcd - error | -4.19                                         | 0.28       | -14.11                                                        | 1.05       | 0.535                                               | -0.03      |

### Eyring plot for rate of exchange

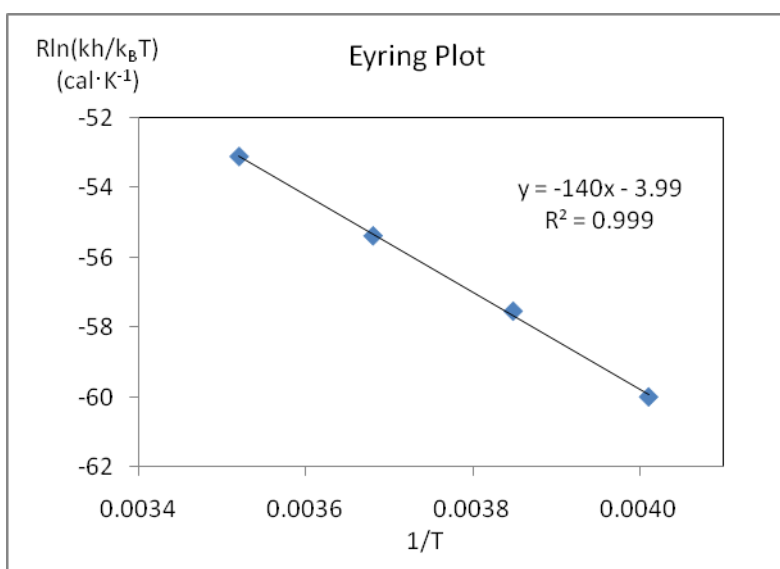

**Error analysis of the Eyring plot**

|               | $\Delta H^\ddagger$<br>(kcal·mol <sup>-1</sup> ) | Difference | $\Delta S^\ddagger$<br>(cal·K <sup>-1</sup> ·mol <sup>-1</sup> ) | Difference | $\Delta G_{298}^\ddagger$<br>(kcal·mol <sup>-1</sup> ) | Difference |
|---------------|--------------------------------------------------|------------|------------------------------------------------------------------|------------|--------------------------------------------------------|------------|
| calcd + error | 15.2                                             | 1.27       | -8.78                                                            | -4.79      | 15.3                                                   | 0.16       |
| calcd         | 14.0                                             | -          | -3.99                                                            | -          | 15.1                                                   | -          |
| calcd - error | 12.7                                             | -1.27      | 0.80                                                             | 4.79       | 15.0                                                   | -0.16      |

**Isolation of Pd<sup>II</sup> product from C–F reductive elimination reaction of 1****Observation of 5 from C–F reductive elimination reaction of 1**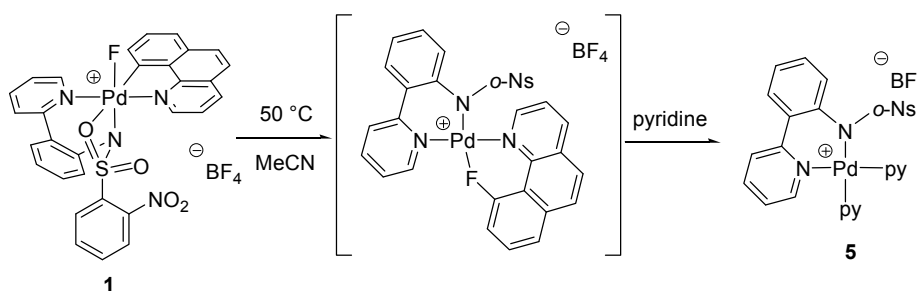

Compound **1** (0.030 mmol) in MeCN (2.0 mL) prepared by above described procedure was warmed to 50 °C and stirred for 30 min. After cooled to 23 °C, pyridine (9.7  $\mu$ L, 0.12 mmol, 4.0 equiv) was added to the reaction mixture. The presence of compound **5** was confirmed by comparing <sup>1</sup>H and <sup>13</sup>C NMR spectra with those of the authentic sample synthesized as shown below.

**Independent synthesis of cationic Pd<sup>II</sup> bispyridinium complex 5****Acetato palladium complex S6**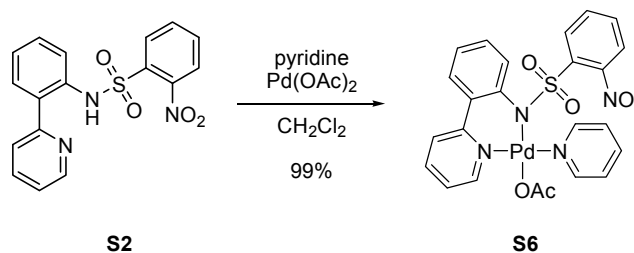

To palladium acetate (448 mg, 2.00 mmol, 1.00 equiv) in CH<sub>2</sub>Cl<sub>2</sub> (20 mL) at 23 °C was added pyridine (485  $\mu$ L, 6.00 mmol, 3.00 equiv) and 2-(2-pyridinyl)phenyl-2-nitrobenzenesulfonamide (**S2**) (711 mg, 2.00 mmol, 1.00 equiv). After stirring for 20 min, the solution was concentrated in vacuo. The resulting residue was triturated with Et<sub>2</sub>O (3  $\times$  1 mL) to afford 1.19 g of the title compound as a pale-yellow solid (99% yield).

Melting Point: 195 °C (decomp.). NMR Spectroscopy:  $^1\text{H}$  NMR (500 MHz,  $\text{CDCl}_3$ , 23 °C,  $\delta$ ): 8.79 (d,  $J$  = 6.5 Hz, 2H), 8.58 (d,  $J$  = 5.5 Hz, 1H), 7.80 (dd,  $J$  = 7.5 Hz, 7.5 Hz, 1H), 7.61 (d,  $J$  = 7.5 Hz, 2H), 7.57–7.52 (m, 2H), 7.48 (d,  $J$  = 8.0 Hz, 1H), 7.39–7.33 (m, 3H), 7.27 (d,  $J$  = 8.0 Hz, 1H), 7.21–7.15 (m, 2H), 7.06–7.03 (m, 2H), 1.85 (s, 3H).  $^{13}\text{C}$  NMR (125 MHz,  $\text{CDCl}_3$ , 23 °C,  $\delta$ ): 177.6, 154.7, 151.8, 151.1, 146.9, 139.9, 138.6, 138.4, 136.3, 134.8, 131.7, 131.1, 130.3, 129.9, 129.6, 125.8, 124.8, 123.3, 122.8, 122.3, 110.7, 23.5. Mass Spectrometry: HRMS-FIA ( $m/z$ ): Calcd for  $[\text{C}_{24}\text{H}_{20}\text{N}_4\text{O}_6\text{PdS} + \text{NH}_4]$ , 616.04760. Found, 616.04730. Anal: calcd for  $\text{C}_{24}\text{H}_{20}\text{N}_4\text{O}_6\text{PdS}$ : C, 48.13; H, 3.37; N, 9.36; found: C, 47.88; H, 3.27; N, 9.20.<sup>3</sup>

### Bis(pyridinium)palladium(II) tetrafluoroborate complex **5**

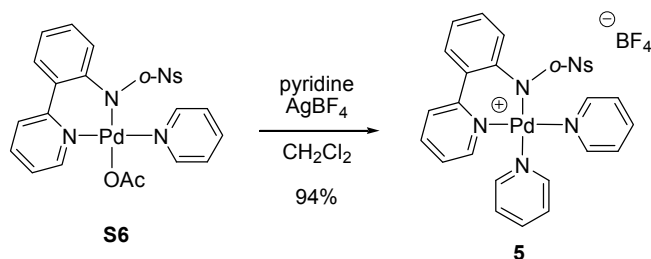

To acetato palladium complex **S6** (30.0 mg, 0.0501 mmol, 1.00 equiv) in  $\text{CH}_2\text{Cl}_2$  (1.0 mL) at 23 °C was added pyridine (4.1  $\mu\text{L}$ , 0.050 mmol, 1.0 equiv) and silver tetrafluoroborate (9.7 mg, 0.050 mmol, 1.0 equiv). After stirring for 30 min at 23 °C, the reaction mixture was filtered through a pad of celite. The filtrate was concentrated in vacuo to afford 33.2 mg of the title compound as yellow oil (94% yield).

NMR Spectroscopy:  $^1\text{H}$  NMR (500 MHz, acetonitrile- $d_3$ , 23 °C,  $\delta$ ): 8.84–8.78 (m, 4H), 7.98–7.93 (m, 2H), 7.76 (dd,  $J$  = 6.0 Hz, 1.0 Hz, 1H), 7.74–7.68 (m, 2H), 7.60 (ddd,  $J$  = 7.5 Hz, 7.5 Hz, 1.5 Hz, 1H), 7.54–7.48 (m, 6H), 7.45 (dd,  $J$  = 8.0 Hz, 1.0 Hz, 1H), 7.32 (ddd,  $J$  = 8.0 Hz, 7.0 Hz, 2.0 Hz, 1H), 7.26 (dd,  $J$  = 7.5 Hz, 1.0 Hz, 1H), 7.18–7.12 (m, 2H), 7.32 (ddd,  $J$  = 7.5 Hz, 5.5 Hz, 1.5 Hz, 1H).  $^{13}\text{C}$  NMR (125 MHz, acetonitrile- $d_3$ , 23 °C,  $\delta$ ): 154.8, 151.9, 151.6, 151.0, 147.1, 141.1, 140.9, 140.5, 139.0, 137.0, 133.4, 132.9, 132.1, 131.7, 130.9, 130.5, 129.1, 127.5, 126.8, 126.5, 125.4, 124.9, 123.3.  $^{19}\text{F}$  NMR (375 MHz, acetonitrile- $d_3$ , 23 °C,  $\delta$ ): –152.0 (s). Mass Spectrometry: HRMS-FIA ( $m/z$ ): Calcd for  $[\text{C}_{27}\text{H}_{22}\text{BF}_4\text{N}_5\text{O}_4\text{PdS} - \text{BF}_4]$ , 618.04327. Found, 618.04334.<sup>3</sup>



## Determination of activation parameters

### C-F reductive elimination from monofluoro Pd(IV) complex **1**

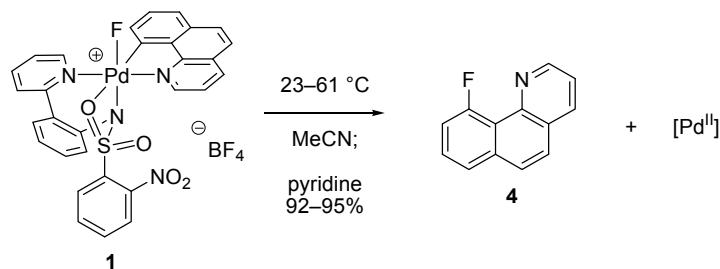

Solutions (33.3 mM) of compound **1** were prepared by reacting compound **S4** (12.8 mg, 0.0200 mmol, 1.00 equiv) with 1-chloromethyl-4-fluoro-1,4-diazoniabicyclo [2.2.2]octane bis(tetrafluoroborate) (**S5**) (7.1 mg, 0.020 mmol, 1.0 equiv) in NMR tubes under nitrogen. NMR samples were placed in the preheated NMR machine and the disappearance of compound **1** and formation of the product **4** were monitored by integrating the peaks, at 6.33 ppm and 9.07 ppm respectively, relative to the peak of 1-chloromethyl-1,4-diazoniabicyclo [2.2.2]octane (tetrafluoroborate) at 4.91 ppm.

#### Kinetic data at 23.3 °C

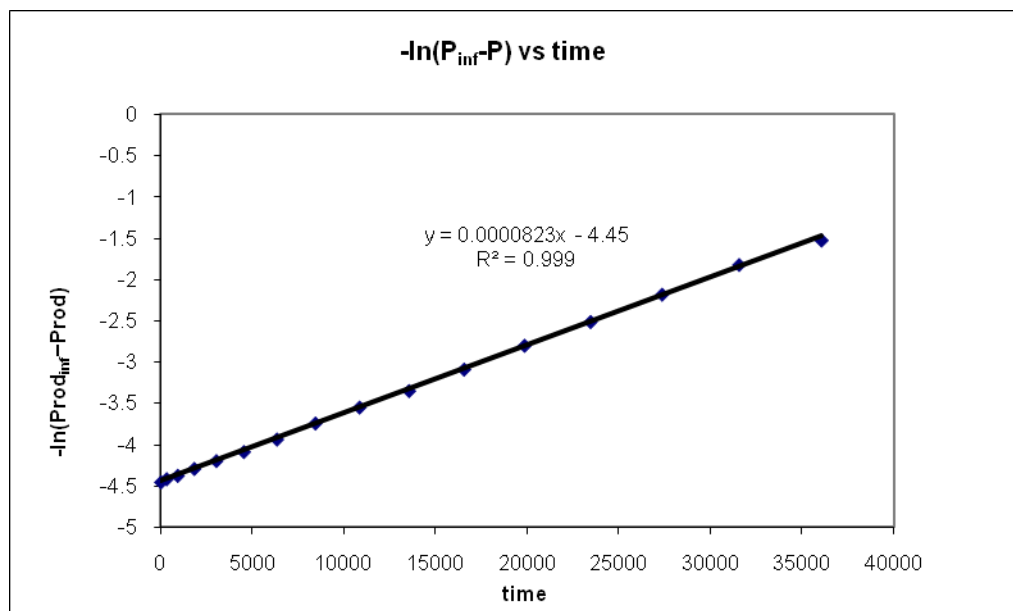

**Kinetic data at 31.7 °C**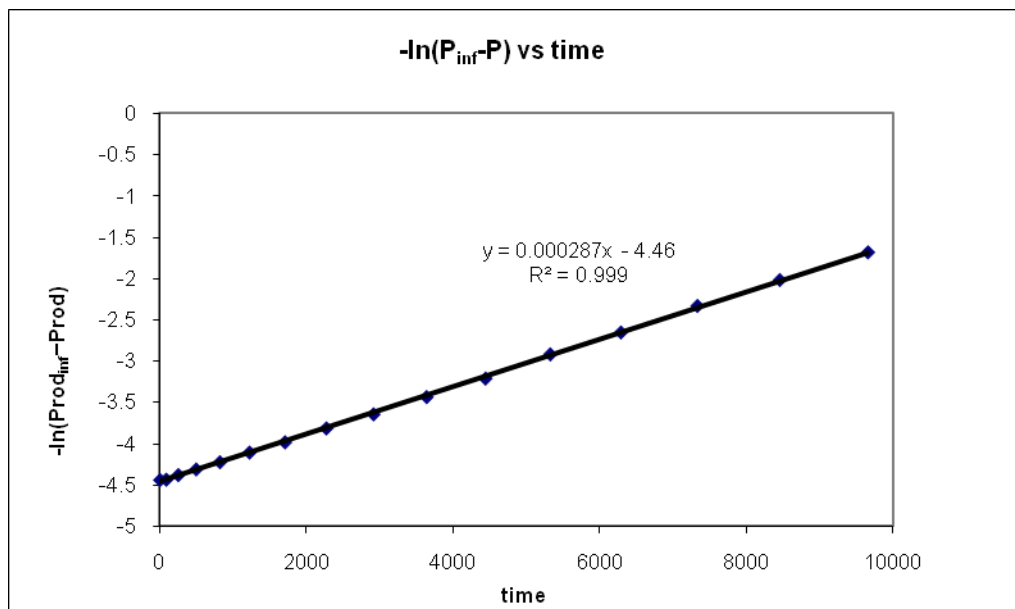**Kinetic data at 40.0 °C**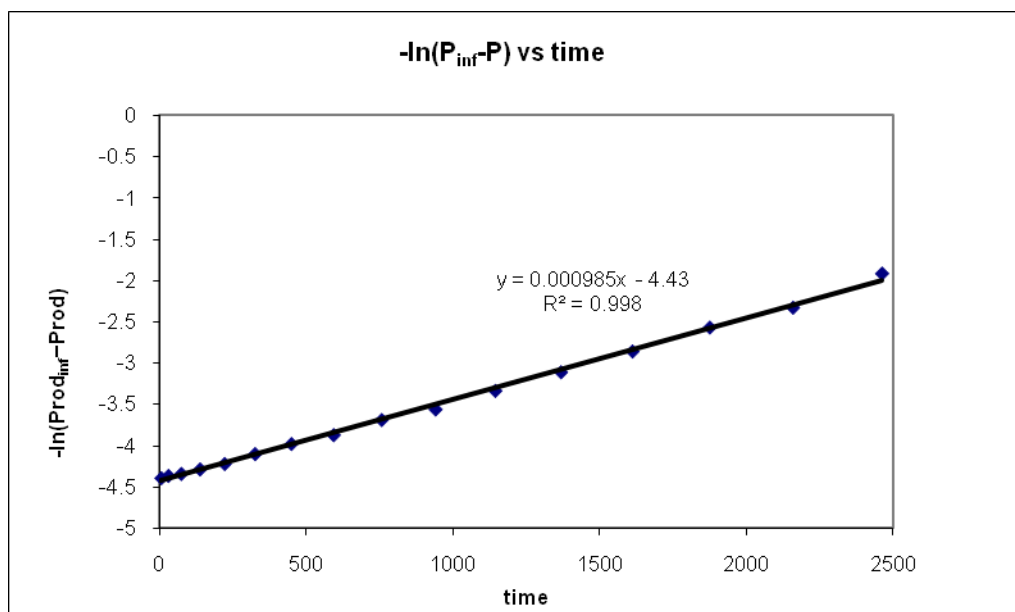

**Kinetic data at 50.6 °C**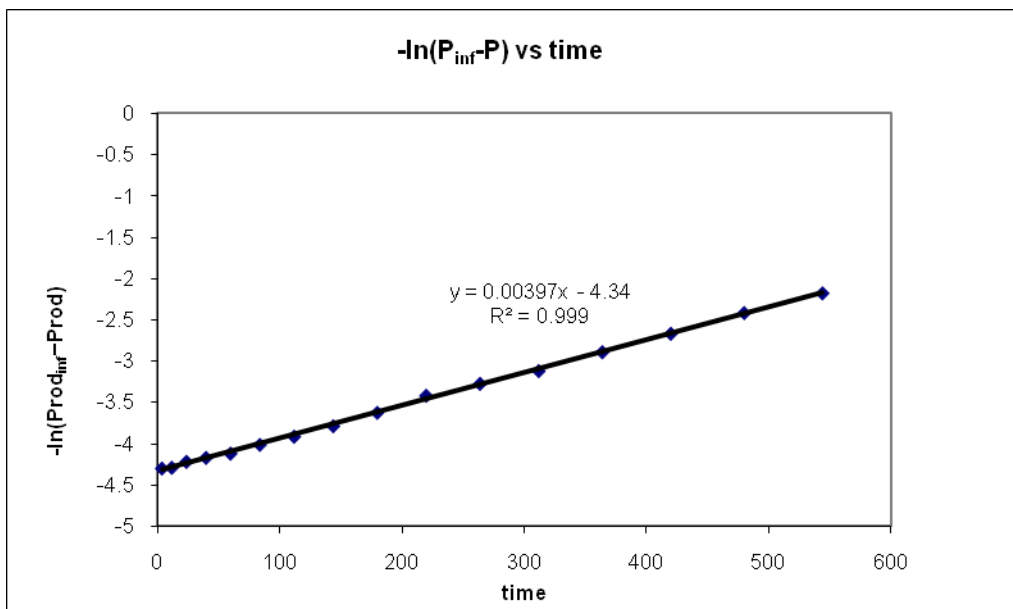**Kinetic data at 61.1 °C**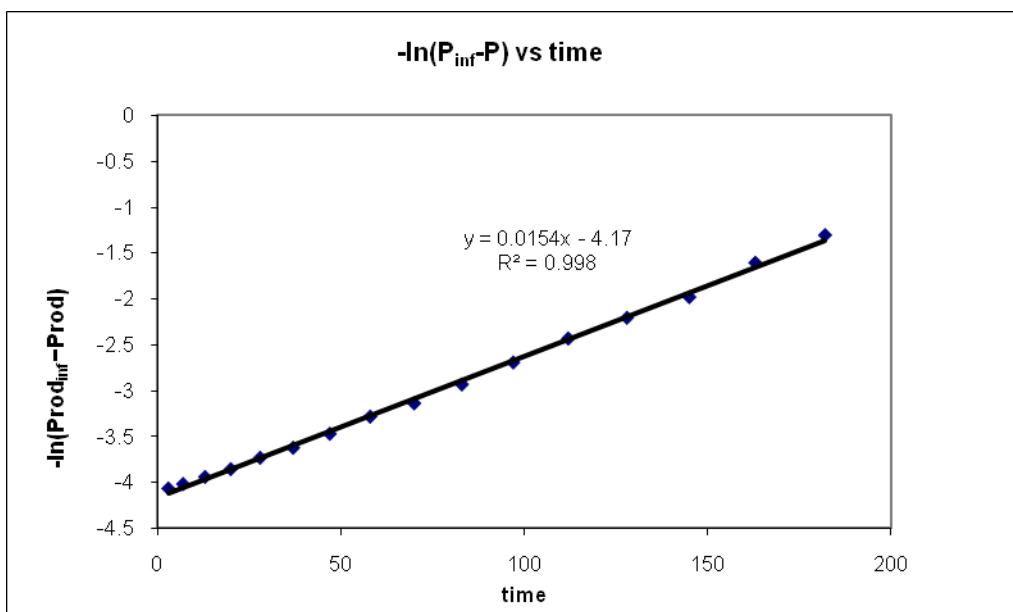

## Eyring plot

| T (°C) | T (K) | k (s <sup>-1</sup> ) | 1/T (K <sup>-1</sup> ) | Rln(kh/k <sub>b</sub> T)<br>(cal·K <sup>-1</sup> ·mol <sup>-1</sup> ) | Yield of <b>4</b> (%) |
|--------|-------|----------------------|------------------------|-----------------------------------------------------------------------|-----------------------|
| 23.3   | 296.3 | 0.0000823            | 0.003376               | -77.2                                                                 | 92                    |
| 31.7   | 304.7 | 0.000287             | 0.003282               | -74.8                                                                 | 95                    |
| 40.0   | 313.0 | 0.000985             | 0.003195               | -72.4                                                                 | 94                    |
| 50.6   | 323.6 | 0.00397              | 0.003090               | -69.7                                                                 | 95                    |
| 61.1   | 334.1 | 0.0154               | 0.002993               | -67.0                                                                 | 94                    |

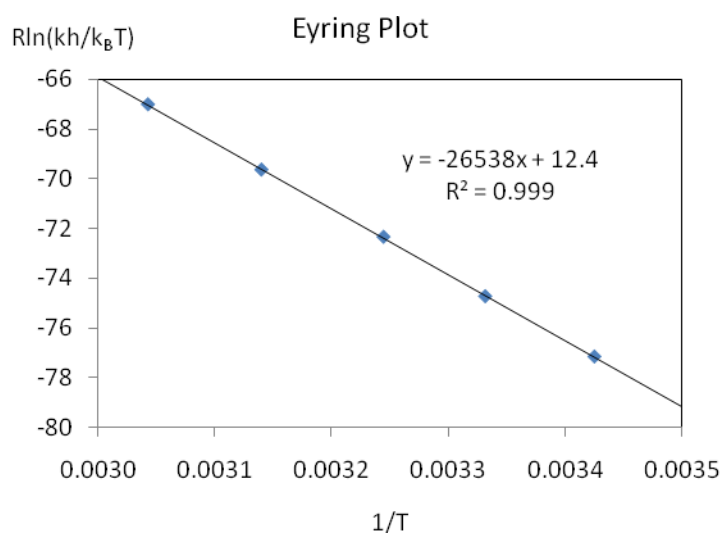

## Error analysis of the Eyring plot

|                  | $\Delta H^\ddagger$<br>(kcal·mol <sup>-1</sup> ) | Difference | $\Delta S^\ddagger$<br>(cal·K <sup>-1</sup> ·mol <sup>-1</sup> ) | Difference | $\Delta G_{298}^\ddagger$<br>(kcal·mol <sup>-1</sup> ) | Difference |
|------------------|--------------------------------------------------|------------|------------------------------------------------------------------|------------|--------------------------------------------------------|------------|
| calcd +<br>error | 27.0                                             | 0.42       | 11.1                                                             | -1.33      | 22.8                                                   | -0.02      |
| calcd            | 26.5                                             | -          | 12.4                                                             | -          | 22.9                                                   | -          |
| calcd - error    | 26.1                                             | -0.42      | 13.7                                                             | 1.33       | 22.9                                                   | 0.02       |

**C–F reductive elimination from monofluoro Pd(IV) pyridine complex **2****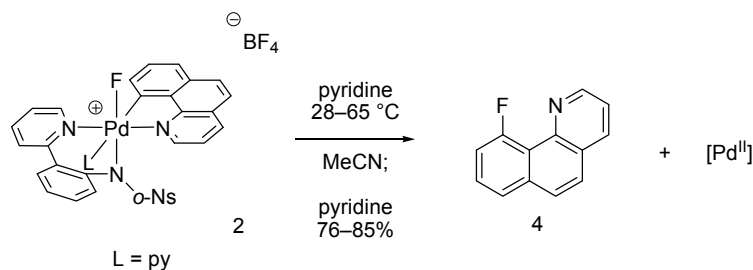

Solutions (33.3 mM) of compound **2** were prepared by reacting compound **S4** (12.8 mg, 0.0200 mmol, 1.00 equiv) with 1-chloromethyl-4-fluoro-1,4-diazoniabicyclo [2.2.2]octane bis(tetrafluoroborate) (**S5**) (7.1 mg, 0.020 mmol, 1.0 equiv) and pyridine (2.4  $\mu\text{L}$ , 0.030 mmol, 1.5 equiv) in NMR tubes under nitrogen. NMR samples were placed in the preheated NMR machine and the disappearance of the compound **2** was monitored by integrating the peak at 6.40 ppm relative to the peak of 1-chloromethyl-1,4-diazoniabicyclo [2.2.2]octane (tetrafluoroborate) at 4.91 ppm. Monitoring product formation was difficult because the competing coordination of pyridine and 10-fluorobenzo[*h*]quinoline complicated the  $^1\text{H}$  NMR spectra. Addition of excess pyridine for monitoring the product formation was unsuccessful because in the presence of excess pyridine, the fluorination yield was significantly lower. The yield of **4** was 83% and 43% for 1.5 equiv and 3.0 equiv of pyridine, respectively at 50 °C.

**Kinetic data at 27.9 °C**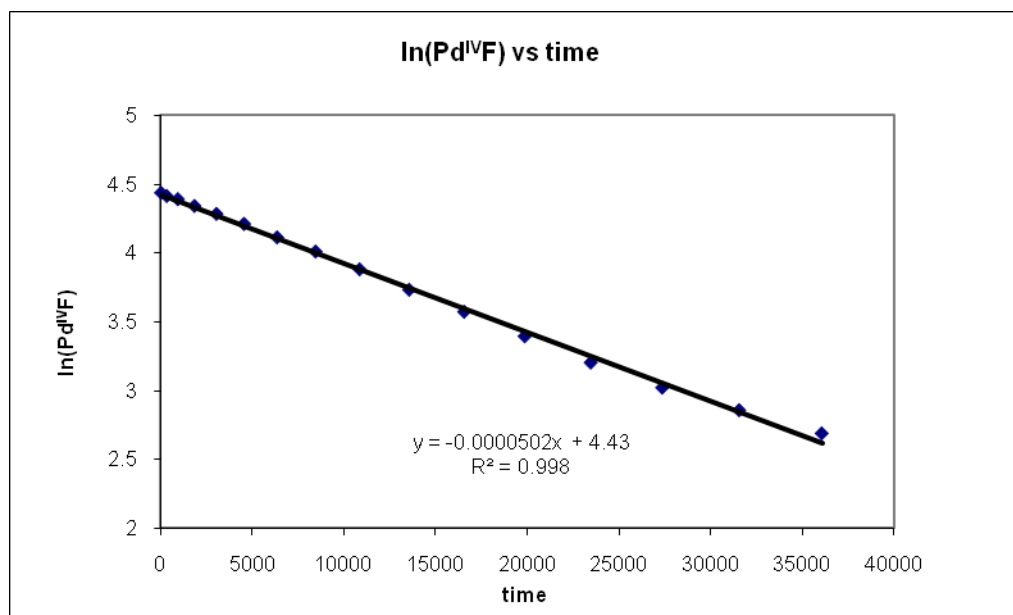

**Kinetic data at 37.3 °C**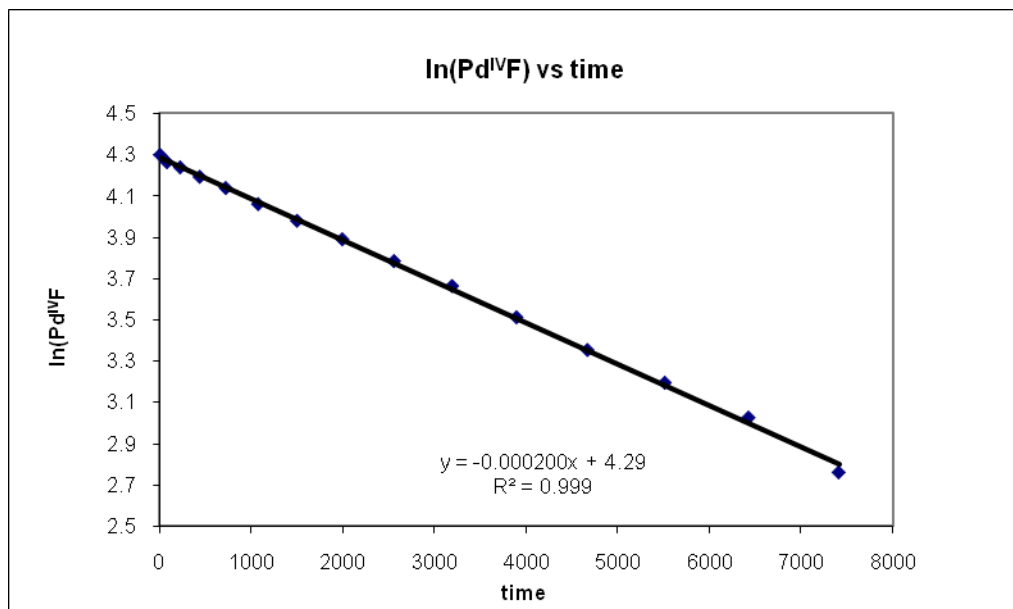**Kinetic data at 47.0 °C**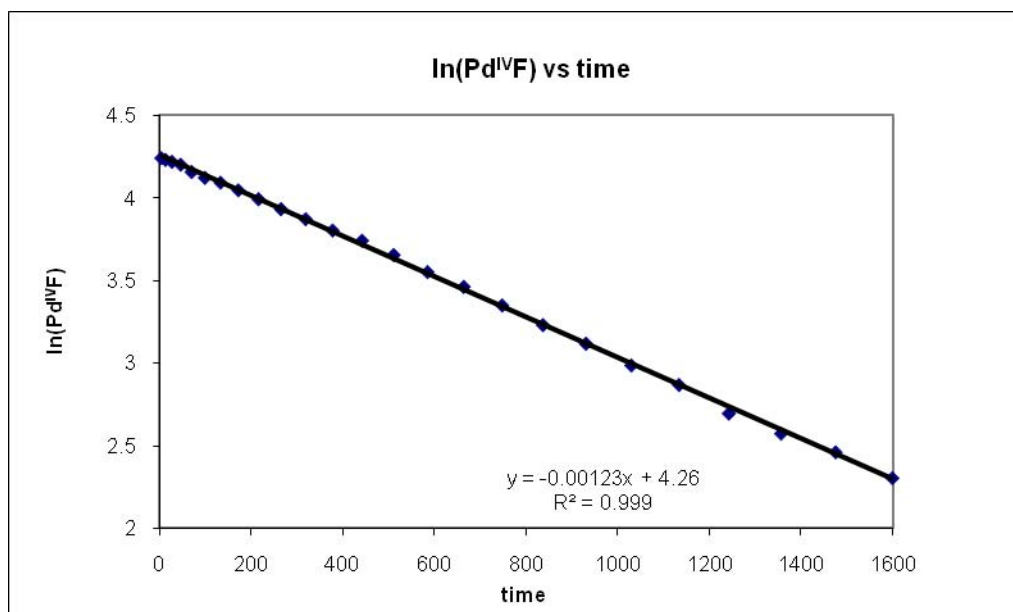

**Kinetic data at 58.6 °C**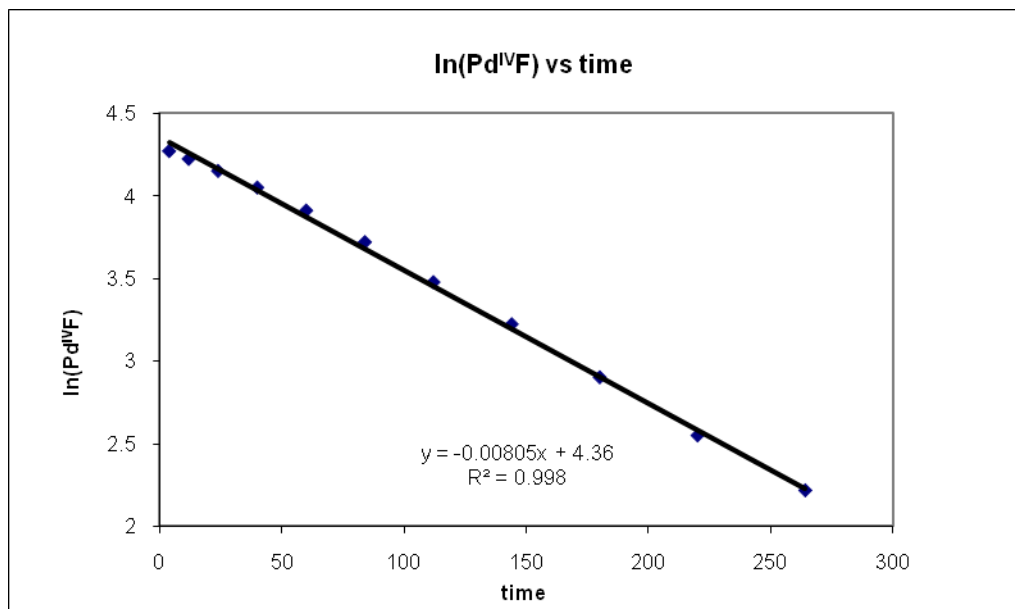**Kinetic data at 65.0 °C**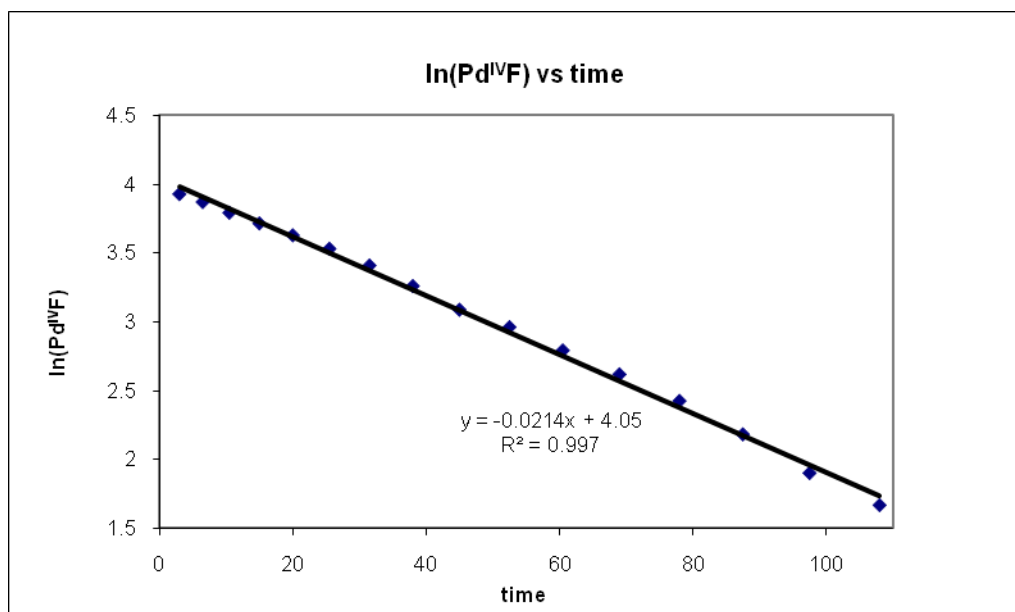

**Eyring plot**

| T (°C) | T (K) | k (s <sup>-1</sup> ) | 1/T (K <sup>-1</sup> ) | Rln(kh/k <sub>b</sub> T)<br>(cal·K <sup>-1</sup> ·mol <sup>-1</sup> ) | Fluorination<br>Yield (%) |
|--------|-------|----------------------|------------------------|-----------------------------------------------------------------------|---------------------------|
| 27.9   | 300.9 | 0.0000502            | 0.003323               | -78.2                                                                 | 76                        |
| 37.2   | 310.2 | 0.000201             | 0.003224               | -75.5                                                                 | 80                        |
| 47.0   | 320.0 | 0.00123              | 0.003125               | -72.0                                                                 | 84                        |
| 58.6   | 331.6 | 0.00805              | 0.003016               | -68.3                                                                 | 84                        |
| 65.0   | 338.0 | 0.0214               | 0.002958               | -66.4                                                                 | 85                        |

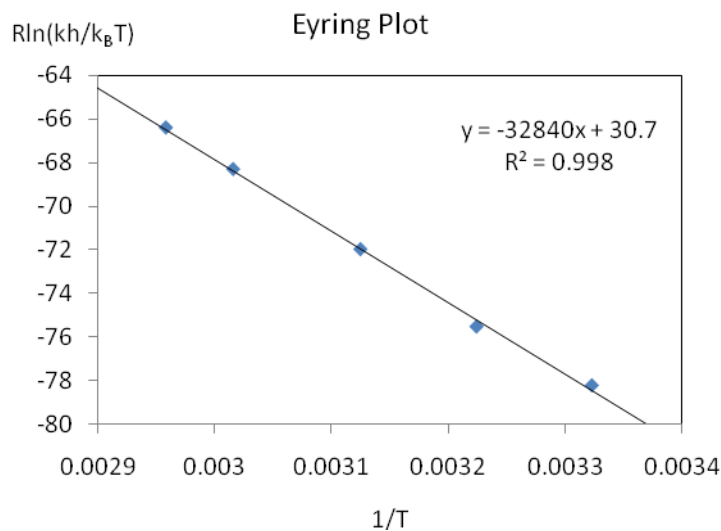**Error analysis of the Eyring plot**

|               | $\Delta H^\ddagger$<br>(kcal·mol <sup>-1</sup> ) | Difference | $\Delta S^\ddagger$<br>(cal·K <sup>-1</sup> ·mol <sup>-1</sup> ) | Difference | $\Delta G_{298}^\ddagger$<br>(kcal·mol <sup>-1</sup> ) | Difference |
|---------------|--------------------------------------------------|------------|------------------------------------------------------------------|------------|--------------------------------------------------------|------------|
| calcd + error | 35.3                                             | 2.49       | 22.9                                                             | -7.79      | 23.5                                                   | -0.17      |
| calcd         | 32.8                                             | -          | 30.7                                                             | -          | 23.7                                                   | -          |
| calcd - error | 30.4                                             | -2.49      | 38.5                                                             | 7.79       | 23.9                                                   | 0.17       |



## Dependence on acetonitrile concentration

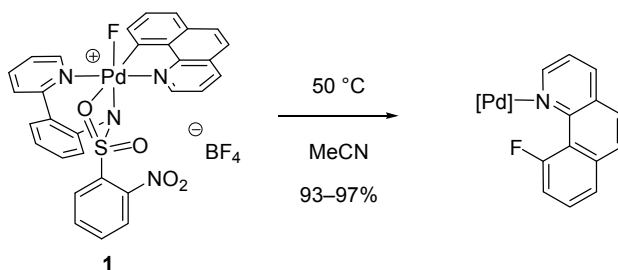

Solutions of compound **1** in various concentration (8.33–41.6 mM) were prepared by reacting compound **S4** (1.0 equiv) with 1-chloromethyl-4-fluoro-1,4-diazoniabicyclo [2.2.2]octane bis-(tetrafluoroborate) (**S5**) (1.0 equiv) in NMR tubes under nitrogen. NMR samples were placed in the preheated NMR machine and the disappearance of compound **1** and formation of product **4** were monitored by integrating the peaks, at 6.33 ppm and 9.07 ppm respectively, relative to the peak of 1-chloromethyl-1,4-diazoniabicyclo [2.2.2]octane (tetrafluoroborate) at 4.91 ppm.

### Pd<sup>IV</sup>F vs MeCN concentration = 1:2298

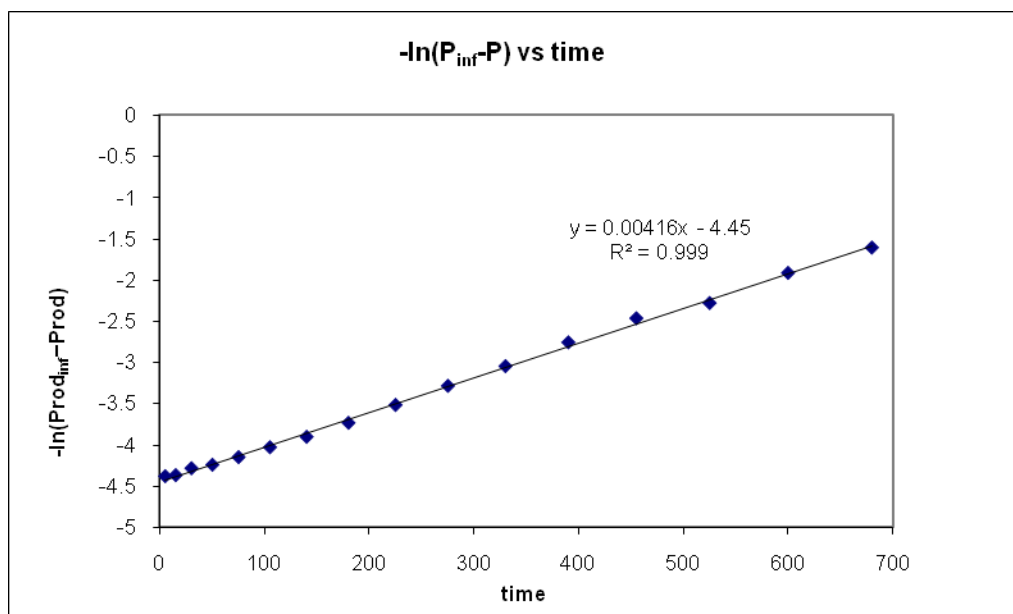

**Pd<sup>IV</sup>F vs MeCN concentration = 1:1532**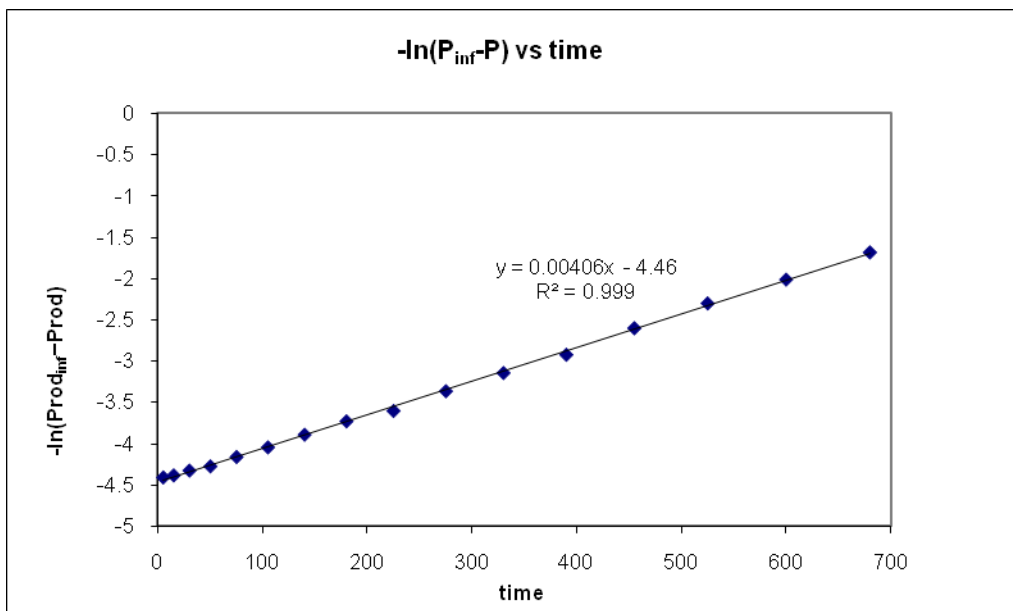**Pd<sup>IV</sup>F vs MeCN concentration = 1:1149**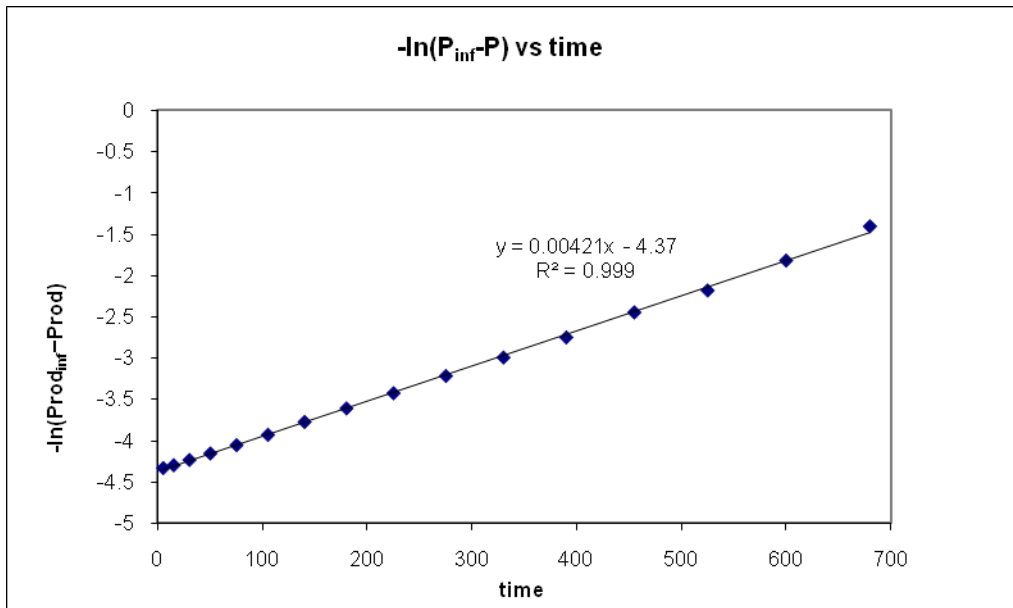

**Pd<sup>IV</sup>F vs MeCN concentration = 1:766**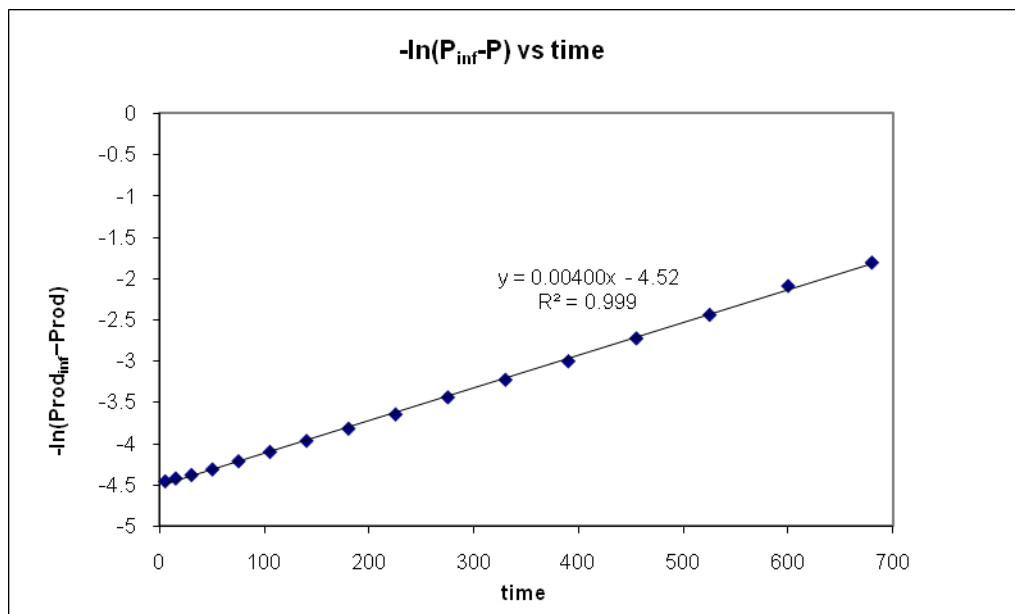**Pd<sup>IV</sup>F vs MeCN concentration = 1:574**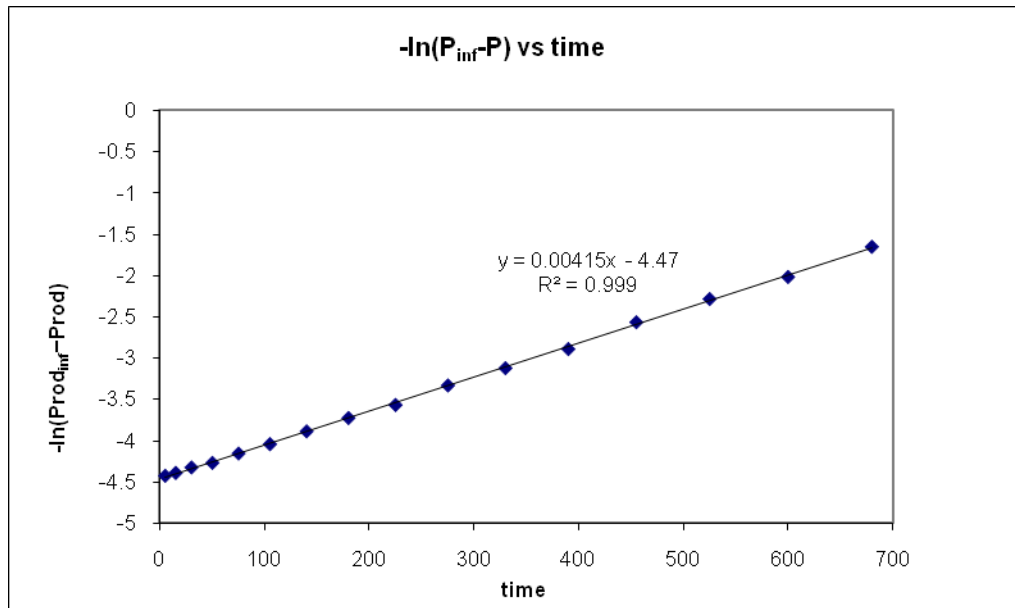

**Pd<sup>IV</sup>F vs MeCN concentration = 1:460**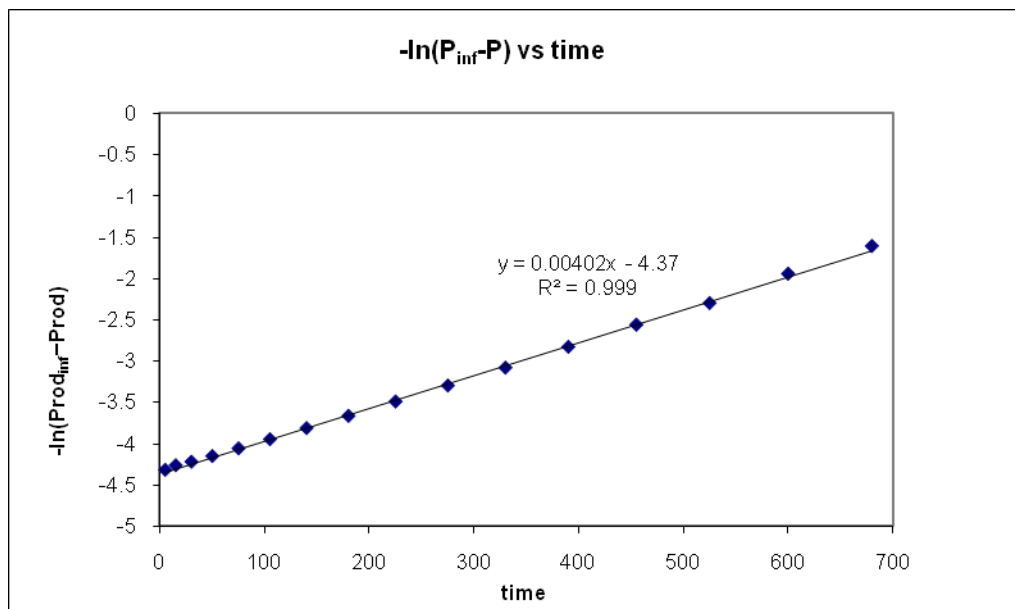**Relationship of rate vs. pyridine concentration**

| MeCN (equiv)<br>(vs. Pd <sup>IV</sup> F) | k (s <sup>-1</sup> ) | 1/k (s) | Fluorination<br>Yield (%) |
|------------------------------------------|----------------------|---------|---------------------------|
| 460                                      | 0.00402              | 249     | 95                        |
| 574                                      | 0.00415              | 241     | 96                        |
| 766                                      | 0.00400              | 250     | 95                        |
| 1149                                     | 0.00421              | 237     | 97                        |
| 1532                                     | 0.00406              | 246     | 94                        |
| 2298                                     | 0.00416              | 240     | 93                        |

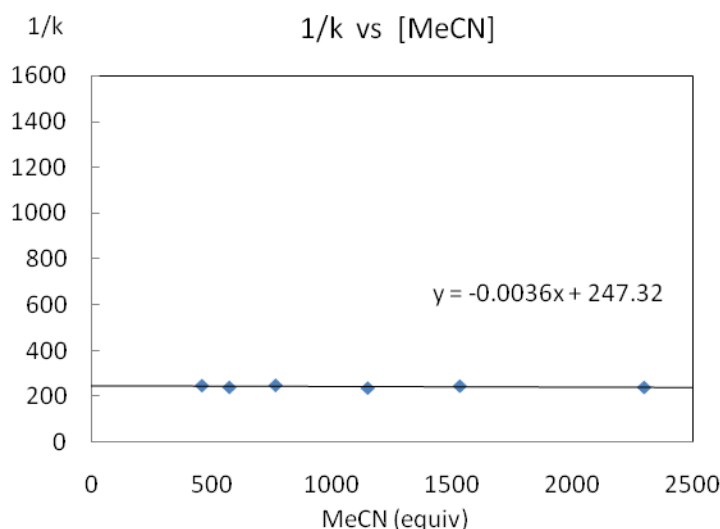

### Dependence on pyridine concentration

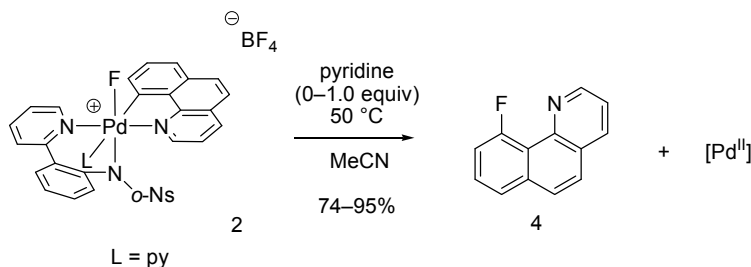

Solutions (33.3 mM) of compound **2** were prepared by reacting compound **S4** (12.8 mg, 0.0200 mmol, 1.00 equiv) with 1-chloromethyl-4-fluoro-1,4-diazoniabicyclo [2.2.2]octane bis(tetrafluoroborate) (**S5**) (7.1 mg, 0.020 mmol, 1.0 equiv) and pyridine (1.00–2.00 equiv) in NMR tubes under nitrogen. NMR samples were placed in a preheated NMR machine and the disappearance of compound **2** was monitored by integrating the peak at 6.40 ppm relative to the peak of 1-chloromethyl-1,4-diazoniabicyclo [2.2.2]octane (tetrafluoroborate) at 4.91 ppm. Monitoring product formation was difficult because the competing coordination of pyridine and 10-fluorobenzo[*h*]quinoline complicated the  $^1\text{H}$  NMR spectra. Further addition of pyridine resulted in significant decrease in fluorination yield. For example, when complex **2** was heated at 50 °C in the presence of 2.0 equiv of additional pyridine, the yield of **4** was 43%. One of the side reaction observed by  $^1\text{H}$  NMR was reduction of **2** to Pd(II) complex **13** similar to the thermal decomposition of **3**.

**Kinetic data with 0 equiv of pyridine**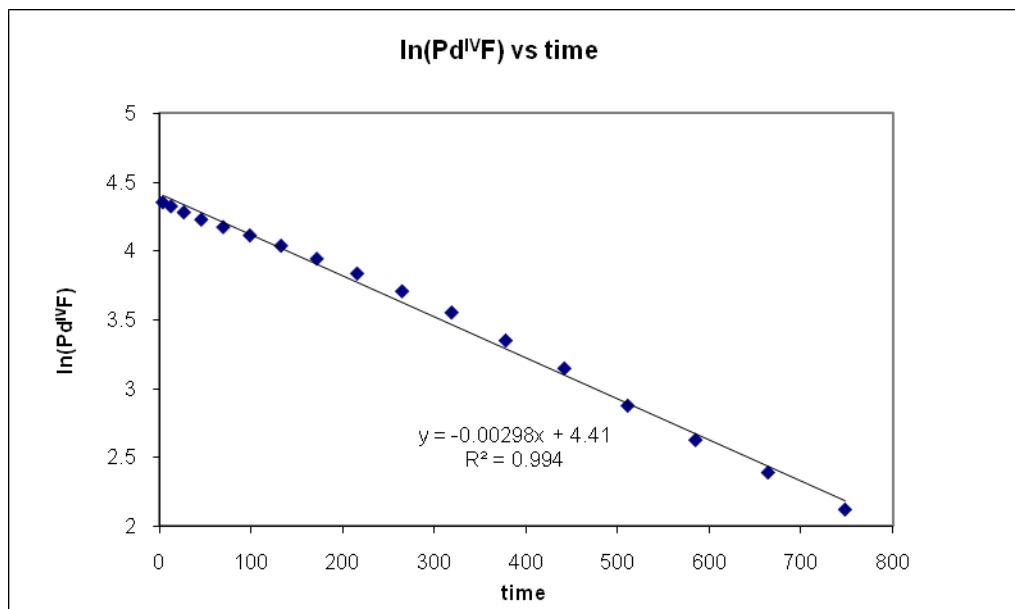**Kinetic data with 0.25 equiv of pyridine**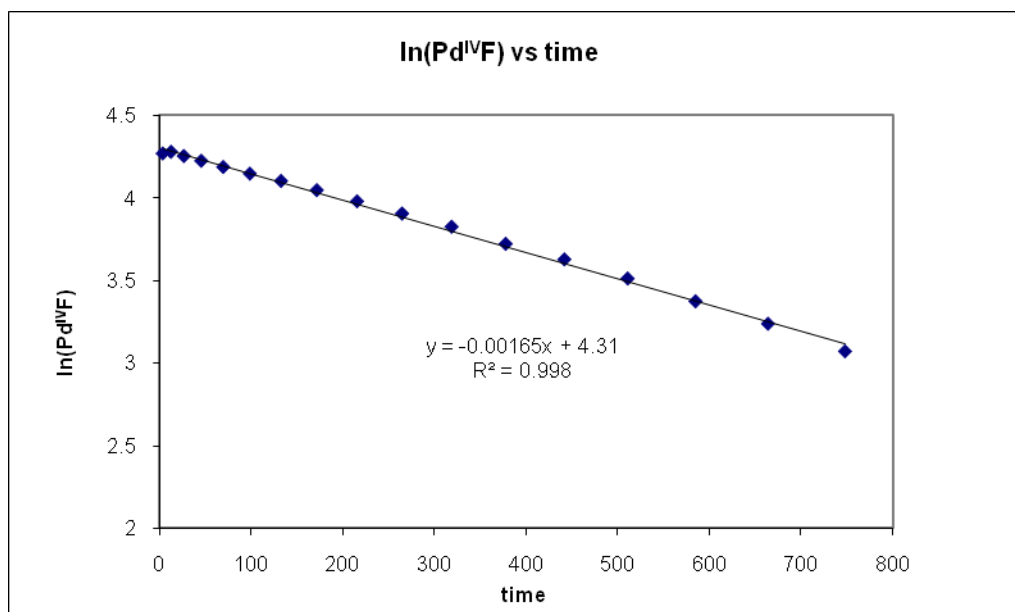

**Kinetic data with 0.50 equiv of pyridine**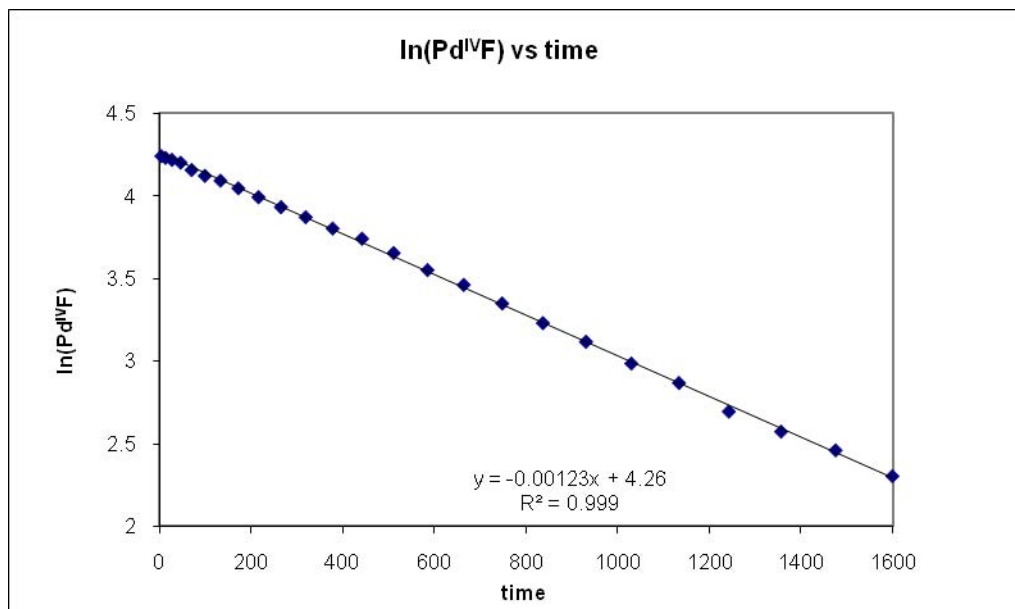**Kinetic data with 0.75 equiv of pyridine**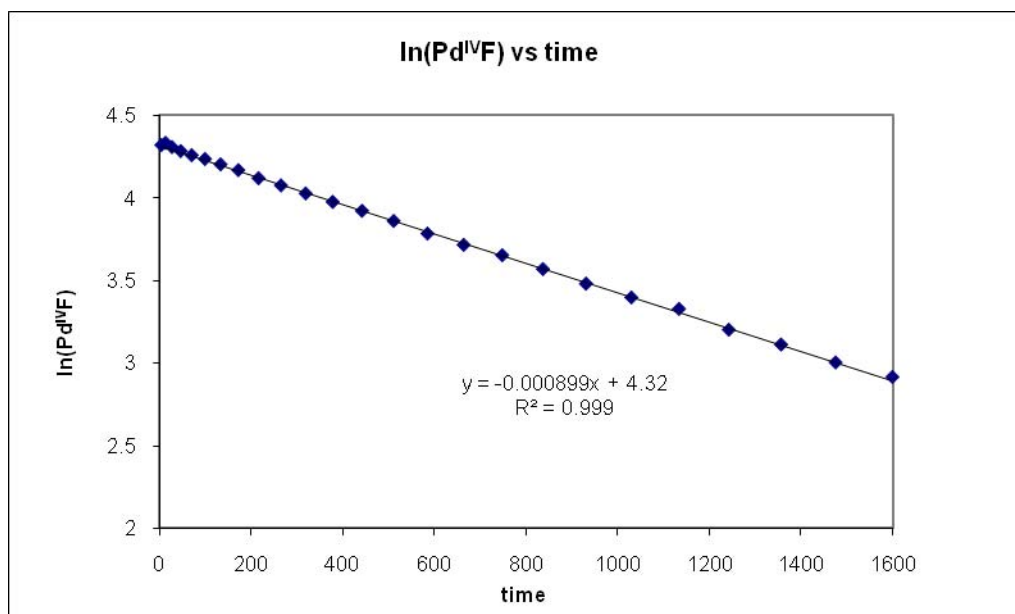

**Kinetic data with 1.00 equiv of pyridine**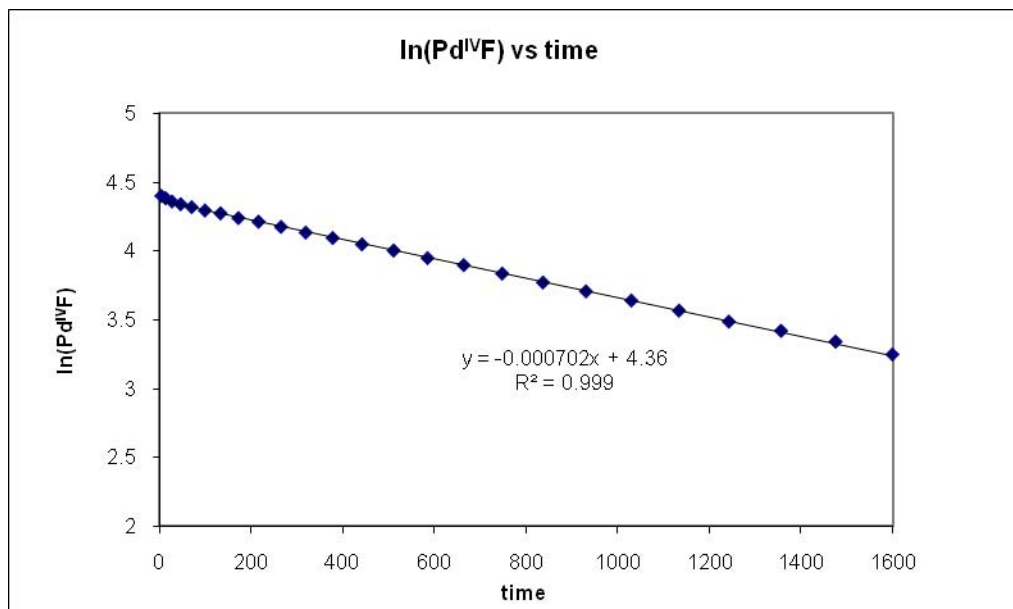**Relationship of rate vs pyridine concentration**

| py (equiv) | k (s <sup>-1</sup> ) | 1/k (s) | Fluorination Yield (%) |
|------------|----------------------|---------|------------------------|
| 0          | 0.00298              | 336     | 95                     |
| 0.25       | 0.00165              | 608     | 90                     |
| 0.50       | 0.00123              | 814     | 86                     |
| 0.75       | 0.000899             | 1112    | 80                     |
| 1.00       | 0.000702             | 1425    | 74                     |



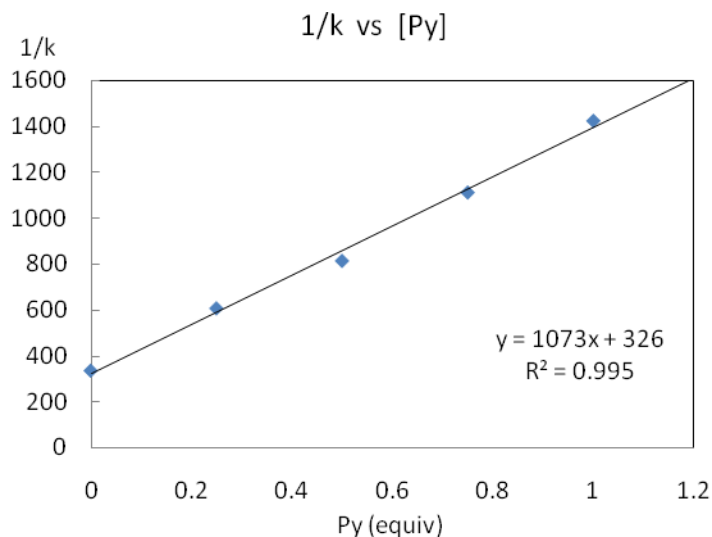

### Rate dependence on *n*-Bu<sub>4</sub>NBF<sub>4</sub>

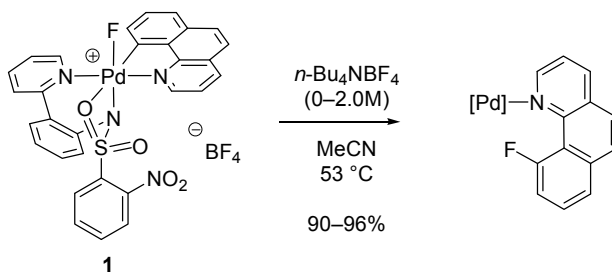

Solutions (16.7 mM) of compound **1** in acetonitrile (0.6 mL) were prepared by reacting compound **S4** (6.4 mg, 0.010 mmol, 1.0 equiv) with 1-chloromethyl-4-fluoro-1,4-diazoniabicyclo [2.2.2]octane bis(tetrafluoroborate) (**S5**) (3.5 mg, 0.010 mmol, 1.0 equiv) and *n*-BuNBF<sub>4</sub> (0–2.0 M) in NMR tubes under nitrogen. NMR samples were placed in a preheated NMR machine (53 °C) and the formation of the product was monitored by integrating the peak at –109 ppm (10-fluoro[*h*]benzoquinoline coordinated to Pd<sup>II</sup>) relative to the peak at –115 ppm (4-fluorotoluene, internal standard, 1.1 μL, 0.010 mmol) in <sup>19</sup>F NMR.

**Kinetic data with 0 M of  $n\text{-Bu}_4\text{NBF}_4$** 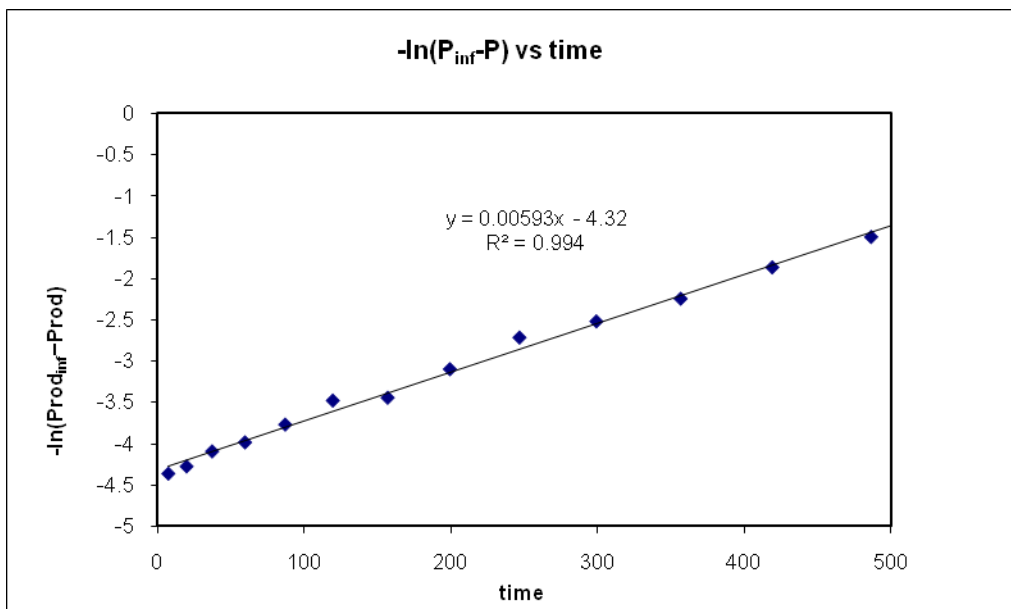**Kinetic data with 0.5 M of  $n\text{-Bu}_4\text{NBF}_4$** 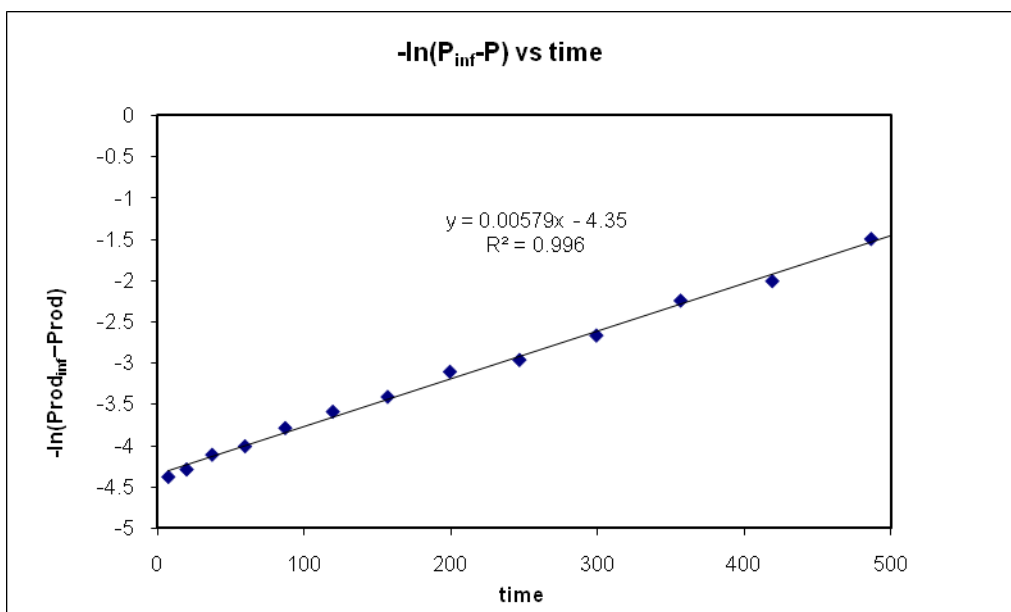

**Kinetic data with 1.0 M of  $n\text{-Bu}_4\text{NBF}_4$** 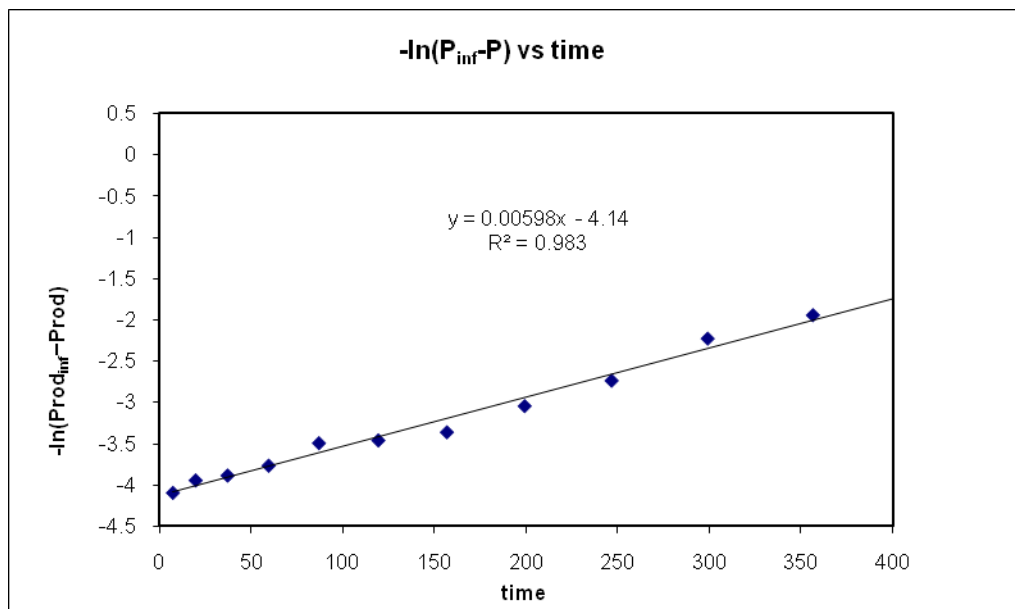**Kinetic data with 1.5 M of  $n\text{-Bu}_4\text{NBF}_4$** 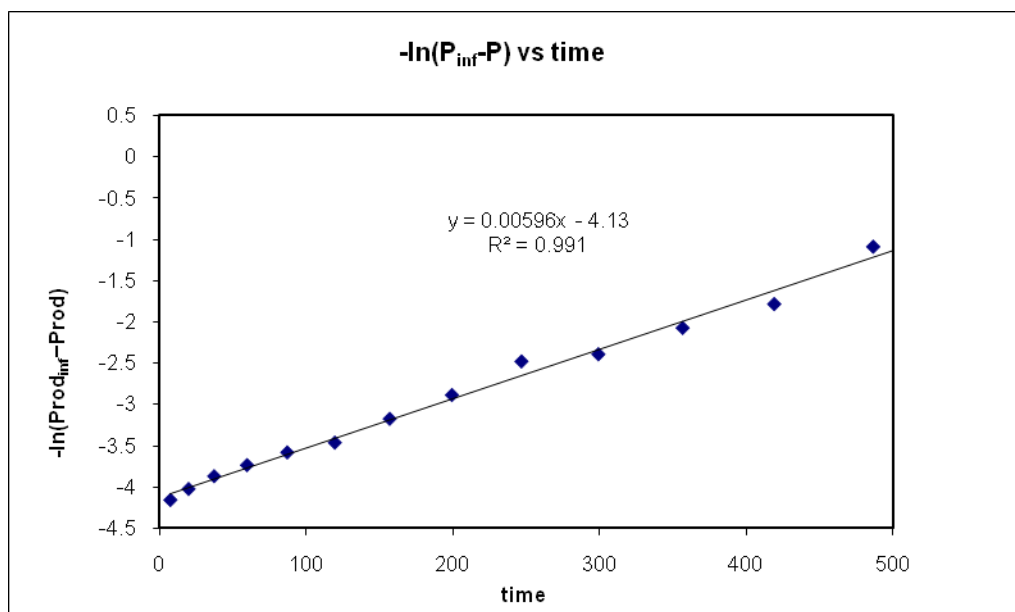

**Kinetic data with 2.0 M of  $n\text{-Bu}_4\text{NBF}_4$** 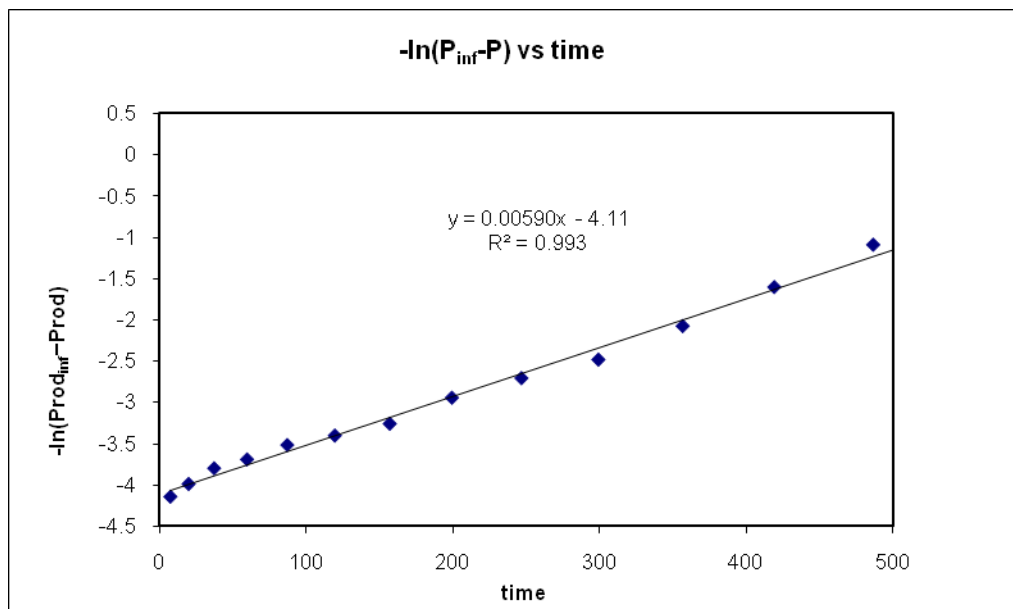**Relationship of rate vs  $n\text{-Bu}_4\text{NBF}_4$  concentration**

| $n\text{-Bu}_4\text{NBF}_4$ (M) | $k$ ( $\text{s}^{-1}$ ) | Fluorination Yield (%) |
|---------------------------------|-------------------------|------------------------|
| 0                               | 0.00593                 | 96                     |
| 0.5                             | 0.00579                 | 93                     |
| 1.0                             | 0.00598                 | 93                     |
| 1.5                             | 0.00596                 | 93                     |
| 2.0                             | 0.00590                 | 90                     |

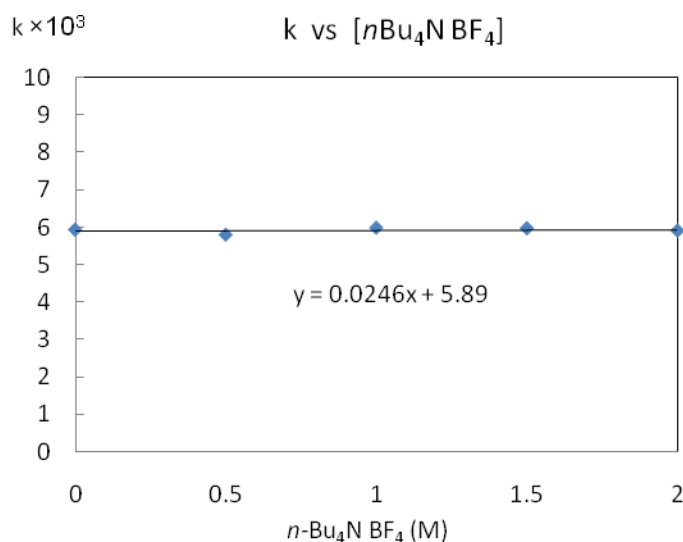

### Hammett plot for sulfonanilide substitution

### Synthesis of pyridinylsulfonanilide ligands with different sulfonanilide substitution

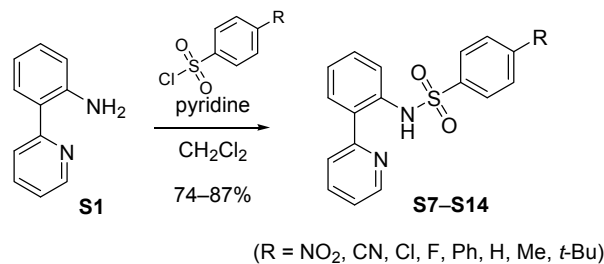

To 2-(2-pyridinyl)aniline (**S1**) (1.00 mmol, 1.00 equiv) in CH<sub>2</sub>Cl<sub>2</sub> (3 mL) at 0 °C was added pyridine (121 μL, 1.50 mmol, 1.50 equiv) and a substituted sulfonyl chloride (1.40 mmol, 1.40 equiv). The reaction mixture was warmed to 23 °C and stirred for 2.0 hr before the addition of water (3 mL). The phases were separated and the aqueous layer was extracted with CH<sub>2</sub>Cl<sub>2</sub> (3 × 2 mL). The combined organic phases were washed with brine (5 mL) and dried (Na<sub>2</sub>SO<sub>4</sub>). The filtrate was concentrated in vacuo and the residue was purified by chromatography on silica gel to afford the correspondingly substituted 2-(2-pyridinyl)benzenesulfonanilide (74–87% yield).

**2-(2-Pyridinyl)-4-nitrobenzenesulfonamide (S7)**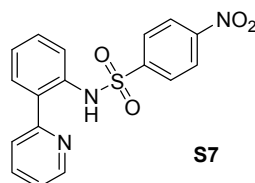

$R_f = 0.12$  (hexanes/EtOAc 7:3 (v/v)). 87% yield. NMR Spectroscopy:  $^1\text{H}$  NMR (500 MHz,  $\text{CDCl}_3$ , 25 °C,  $\delta$ ): 12.47 (br s, 1H), 8.60 (dd,  $J = 4.0$  Hz,  $J = 1.0$  Hz, 1H), 7.97 (d,  $J = 8.5$  Hz, 2H), 7.73–7.68 (m, 2H), 7.60 (d,  $J = 8.5$  Hz, 2H), 7.55 (dd,  $J = 7.5$  Hz,  $J = 1.0$  Hz, 1H), 7.41–7.37 (m, 2H), 7.28 (dd,  $J = 5.0$  Hz,  $J = 2.5$  Hz, 1H), 7.22 (dd,  $J = 8.0$  Hz,  $J = 8.0$  Hz, 1H).  $^{13}\text{C}$  NMR (125 MHz,  $\text{CDCl}_3$ , 25 °C,  $\delta$ ): 156.6, 149.6, 147.3, 144.8, 137.8, 135.7, 130.4, 128.5, 127.8, 127.6, 125.7, 124.0, 123.6, 122.4, 122.2. Mass Spectrometry: HRMS-FIA ( $m/z$ ): Calcd for  $[\text{C}_{17}\text{H}_{13}\text{N}_3\text{O}_4\text{S} + \text{Na}]$ , 378.05190. Found, 378.05196.

**2-(2-Pyridinyl)-4-cyanobenzenesulfonamide (S8)**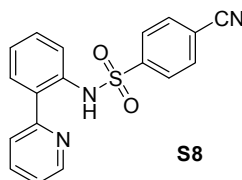

$R_f = 0.25$  (hexanes/EtOAc 4:1 (v/v)). 75% yield. NMR Spectroscopy:  $^1\text{H}$  NMR (500 MHz,  $\text{CDCl}_3$ , 25 °C,  $\delta$ ): 12.39 (br s, 1H), 7.73 (ddd,  $J = 8.0$  Hz,  $J = 8.0$  Hz,  $J = 2.0$  Hz, 1H), 7.70 (dd,  $J = 8.5$  Hz,  $J = 1.5$  Hz, 1H), 7.56–7.52 (m, 3H), 7.44–7.36 (m, 5H), 7.29–7.27 (m, 1H), 7.21 (ddd,  $J = 7.5$  Hz,  $J = 7.5$  Hz,  $J = 1.0$  Hz, 1H).  $^{13}\text{C}$  NMR (125 MHz,  $\text{CDCl}_3$ , 25 °C,  $\delta$ ): 156.5, 147.3, 143.2, 137.8, 135.8, 132.2, 130.3, 128.5, 127.6, 127.2, 125.6, 124.0, 122.3, 122.1, 117.2, 115.7. Mass Spectrometry: HRMS-FIA ( $m/z$ ): Calcd for  $[\text{C}_{18}\text{H}_{13}\text{N}_3\text{O}_2\text{S} + \text{Na}]$ , 358.06207. Found, 358.06245.

**2-(2-Pyridinyl)-4-chlorobenzenesulfonamide (S9)**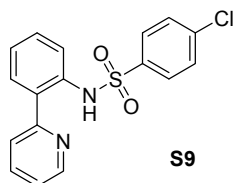

$R_f = 0.20$  (hexanes/EtOAc 7:3 (v/v)). 87% yield. NMR Spectroscopy:  $^1\text{H}$  NMR (500 MHz,  $\text{CDCl}_3$ , 25 °C,  $\delta$ ): 12.13 (br s, 1H), 8.58 (d,  $J = 5.0$  Hz, 1H), 7.74–7.69 (m, 2H), 7.53 (d,  $J = 8.0$  Hz, 1H), 7.39–7.34 (m,

4H), 7.26 (dd,  $J = 6.5$  Hz,  $J = 6.5$  Hz, 1H) 7.20 (dd,  $J = 7.5$  Hz,  $J = 7.5$  Hz, 1H), 7.10 (d,  $J = 8.5$  Hz, 2H).  $^{13}\text{C}$  NMR (125 MHz,  $\text{CDCl}_3$ , 25 °C,  $\delta$ ): 156.8, 147.3, 138.6, 137.6, 137.5, 136.2, 130.2, 128.6, 128.5, 128.0, 128.0, 125.3, 124.1, 122.3, 122.2. Mass Spectrometry: HRMS-FIA ( $m/z$ ): Calcd for  $[\text{C}_{17}\text{H}_{13}\text{ClN}_2\text{O}_2\text{S} + \text{Na}]$ , 367.02785. Found, 367.02687.

### 2-(2-Pyridinyl)-4-fluorobenzenesulfonanilide (S10)

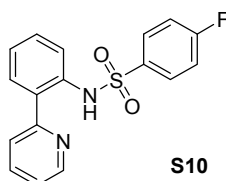

$R_f = 0.12$  (hexanes/EtOAc 7:3 (v/v)). 74% yield. NMR Spectroscopy:  $^1\text{H}$  NMR (500 MHz,  $\text{CDCl}_3$ , 25 °C,  $\delta$ ): 12.15 (br s, 1H), 8.59 (dd,  $J = 5.5$  Hz,  $J = 1.0$  Hz, 1H), 7.74–7.70 (m, 2H), 7.53 (dd,  $J = 9.0$  Hz,  $J = 1.0$  Hz, 1H), 7.45–7.35 (m, 5H), 7.26–7.24 (m, 1H), 7.20 (ddd,  $J = 7.5$  Hz,  $J = 7.5$  Hz,  $J = 1.0$  Hz, 1H).  $^{13}\text{C}$  NMR (125 MHz,  $\text{CDCl}_3$ , 25 °C,  $\delta$ ): 164.7 (d,  $J = 253.0$  Hz), 156.8, 147.3, 137.6, 136.3, 135.2 (d,  $J = 3.6$  Hz), 130.2, 129.3 (d,  $J = 9.2$  Hz), 128.5, 127.8, 125.2, 124.0, 122.2, 122.2, 115.6 (d,  $J = 22.0$  Hz).  $^{19}\text{F}$  NMR (375 MHz,  $\text{CDCl}_3$ , 23 °C,  $\delta$ ): –106.2. Mass Spectrometry: HRMS-FIA ( $m/z$ ): Calcd for  $[\text{C}_{17}\text{H}_{13}\text{FN}_2\text{O}_2\text{S} + \text{H}]$ , 329.07545. Found, 329.07554.

### 2-(2-Pyridinyl)-4-phenylbenzenesulfonanilide (S11)

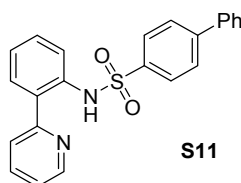

$R_f = 0.25$  (hexanes/EtOAc 4:1 (v/v)). 83% yield. NMR Spectroscopy:  $^1\text{H}$  NMR (500 MHz,  $\text{CDCl}_3$ , 25 °C,  $\delta$ ): 12.15 (br s, 1H), 8.59 (dd,  $J = 5.5$  Hz,  $J = 1.0$  Hz, 1H), 7.77 (dd,  $J = 8.0$  Hz,  $J = 1.5$  Hz, 1H), 7.63 (ddd,  $J = 8.0$  Hz,  $J = 8.0$  Hz,  $J = 2.0$  Hz, 1H), 7.52–7.31 (m, 11H), 7.23 (ddd,  $J = 4.5$  Hz,  $J = 7.0$  Hz,  $J = 1.0$  Hz, 1H), 7.18 (ddd,  $J = 7.5$  Hz,  $J = 7.5$  Hz,  $J = 1.0$  Hz, 1H).  $^{13}\text{C}$  NMR (125 MHz,  $\text{CDCl}_3$ , 25 °C,  $\delta$ ): 156.8, 147.2, 144.9, 139.1, 137.5, 137.4, 136.4, 130.0, 128.9, 128.4, 128.3, 128.0, 127.0, 127.0, 126.9, 125.0, 124.0, 122.2, 122.0. Mass Spectrometry: HRMS-FIA ( $m/z$ ): Calcd for  $[\text{C}_{23}\text{H}_{18}\text{N}_2\text{O}_2\text{S} + \text{Na}]$ , 409.09812. Found, 409.09709.

**2-(2-Pyridinyl)-4-benzenesulfonanilide (S12)**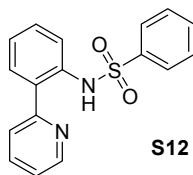

$R_f = 0.25$  (hexanes/EtOAc 7:3 (v/v)). 74% yield. NMR Spectroscopy:  $^1\text{H}$  NMR (500 MHz,  $\text{CDCl}_3$ , 25 °C,  $\delta$ ): 12.20 (br s, 1H), 8.59 (d,  $J = 5.5$  Hz, 1H), 7.72–7.67 (m, 2H), 7.52 (d,  $J = 8.5$  Hz, 1H), 7.46–7.45 (m, 2H), 7.37–7.31 (m, 3H), 7.23 (dd,  $J = 7.5$  Hz,  $J = 5.0$  Hz, 1H), 7.18–7.14 (m, 3H).  $^{13}\text{C}$  NMR (125 MHz,  $\text{CDCl}_3$ , 25 °C,  $\delta$ ): 156.9, 147.3, 139.1, 137.6, 136.6, 132.1, 130.1, 128.5, 128.5, 127.6, 126.6, 124.8, 123.6, 122.2, 122.0. Mass Spectrometry: HRMS-FIA ( $m/z$ ): Calcd for  $[\text{C}_{17}\text{H}_{14}\text{N}_2\text{O}_2\text{S} + \text{Na}]$ , 333.06682. Found, 333.06713.

**2-(2-Pyridinyl)-4-toluenesulfonanilide (S13)**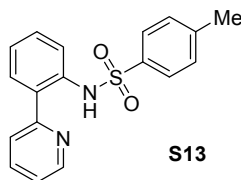

$R_f = 0.30$  (hexanes/EtOAc 7:3 (v/v)). 80% yield. NMR Spectroscopy:  $^1\text{H}$  NMR (500 MHz,  $\text{CDCl}_3$ , 25 °C,  $\delta$ ): 12.17 (s, 1H), 8.61 (d,  $J = 4.5$  Hz, 1H), 7.74–7.71 (m, 2H), 7.54 (d,  $J = 7.5$  Hz, 1H), 7.42–7.34 (m, 4H), 7.28–7.25 (m, 1H), 7.17 (dd,  $J = 8.5$  Hz,  $J = 8.5$  Hz, 1H), 6.98 (d,  $J = 8.0$  Hz, 2H), 2.28 (s, 3H).  $^{13}\text{C}$  NMR (125 MHz,  $\text{CDCl}_3$ , 25 °C,  $\delta$ ): 157.0, 147.3, 142.9, 137.4, 136.7, 136.3, 130.1, 129.1, 128.4, 127.4, 126.7, 124.6, 123.3, 122.2, 122.0, 21.3. Mass Spectrometry: HRMS-FIA ( $m/z$ ): Calcd for  $[\text{C}_{18}\text{H}_{16}\text{N}_2\text{O}_2\text{S} + \text{Na}]$ , 347.08247. Found, 347.08296.

**2-(2-Pyridinyl)-4-tert-butylbenzenesulfonanilide (S14)**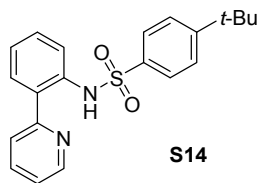

$R_f = 0.25$  (hexanes/EtOAc 4:1 (v/v)). 86% yield. NMR Spectroscopy:  $^1\text{H}$  NMR (500 MHz,  $\text{CDCl}_3$ , 25 °C,  $\delta$ ): 12.02 (s, 1H), 8.57 (dd,  $J = 5.0$  Hz,  $J = 1.0$  Hz, 1H), 7.71 (dd,  $J = 7.5$  Hz,  $J = 1.0$  Hz, 1H), (ddd,  $J = 8.0$  Hz,  $J = 8.0$  Hz,  $J = 2.0$  Hz, 1H), 7.50 (dd,  $J = 7.5$  Hz,  $J = 1.0$  Hz, 1H), 7.38–7.28 (m, 4H), 7.23–7.13



(m, 3H), 1.21 (s, 9H).  $^{13}\text{C}$  NMR (125 MHz,  $\text{CDCl}_3$ , 25 °C,  $\delta$ ): 156.9, 155.8, 147.3, 137.4, 136.6, 136.1, 130.0, 128.4, 128.0, 126.4, 125.4, 124.9, 124.1, 122.1, 121.9, 34.8, 30.9. Mass Spectrometry: HRMS-FIA (m/z): Calcd for  $[\text{C}_{21}\text{H}_{22}\text{N}_2\text{O}_2\text{S} + \text{H}]$ , 367.14748. Found, 367.14798.

## Synthesis of Pd(II) complexes with different sulfonanilide substitution

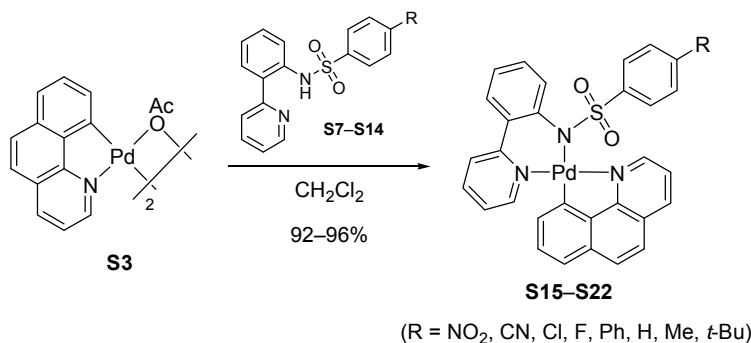

To benzo[*h*]quinolinyll palladium acetate dimer (**S3**) (100 mg, 0.145 mmol, 1.00 equiv) in  $\text{CH}_2\text{Cl}_2$  (2 mL) at 23 °C was added a substituted pyridinylsulfonanilide ligand **S7–S14** (0.291 mmol, 2.00 equiv). After stirring for 1.0 hr the reaction mixture was concentrated in vacuo. The resulting residue was triturated with  $\text{Et}_2\text{O}$  ( $3 \times 1$  mL) to afford the corresponding substituted palladium(II) complex (92–96% yield).

### 4-Nitrobenzenesulfonanilido palladium(II) complex S15

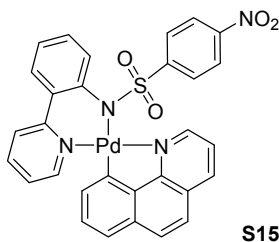

92% yield. NMR Spectroscopy:  $^1\text{H}$  NMR (500 MHz,  $\text{CDCl}_3$ , 25 °C,  $\delta$ ): 9.59 (dd,  $J = 5.5$  Hz,  $J = 1.5$  Hz, 1H), 8.89 (dd,  $J = 6.0$  Hz,  $J = 1.5$  Hz, 1H), 8.33 (dd,  $J = 8.0$  Hz,  $J = 1.5$  Hz, 1H), 7.81–7.74 (m, 3H), 7.68–7.58 (m, 5H), 7.52–7.50 (m, 3H), 7.38–7.35 (m, 2H), 7.30 (dd,  $J = 7.0$  Hz,  $J = 7.0$  Hz, 1H), 7.22 (ddd,  $J = 8.0$  Hz,  $J = 8.0$  Hz,  $J = 1.0$  Hz, 1H), 7.06 (d,  $J = 10.5$ , 1H), 6.95 (d,  $J = 6.5$  Hz, 1H).  $^{13}\text{C}$  NMR (125 MHz,  $\text{CDCl}_3$ , 25 °C,  $\delta$ ): 157.9, 155.3, 154.4, 153.7, 150.8, 149.8, 147.9, 142.2, 142.2, 138.4, 137.5, 135.7, 133.2, 131.9, 130.9, 130.3, 129.3, 128.8, 128.3, 126.7, 126.6, 124.8, 124.7, 123.6, 123.4, 123.3, 123.2, 121.7. Mass Spectrometry: HRMS-FIA (m/z): Calcd for  $[\text{C}_{30}\text{H}_{20}\text{N}_4\text{O}_4\text{PdS} + \text{H}]$ , 639.03183. Found, 639.03155.

**4-Cyanobenzenesulfonanilido palladium(II) complex S16**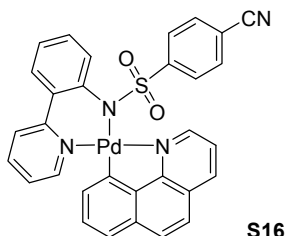

93% yield. NMR Spectroscopy:  $^1\text{H}$  NMR (500 MHz,  $\text{CDCl}_3$ , 25  $^\circ\text{C}$ ,  $\delta$ ): 9.58 (dd,  $J = 1.5$  Hz,  $J = 5.5$  Hz, 1H), 8.88 (dd,  $J = 1.0$  Hz,  $J = 5.5$  Hz, 1H), 8.32 (dd,  $J = 1.5$  Hz,  $J = 8.0$  Hz, 1H), 7.80–7.73 (m, 3H), 7.66 (dd,  $J = 5.0$  Hz,  $J = 8.0$  Hz, 1H), 7.60 (dd,  $J = 8.5$  Hz,  $J = 12.5$  Hz, 2H), 7.50 (dd,  $J = 7.5$  Hz,  $J = 7.5$  Hz, 1H), 7.43 (d,  $J = 7.0$  Hz, 2H), 7.38–7.33 (m, 3H), 7.26–7.20 (m, 3H), 7.08 (d,  $J = 8.0$  Hz, 1H), 6.96 (d,  $J = 7.0$  Hz, 1H).  $^{13}\text{C}$  NMR (125 MHz,  $\text{CDCl}_3$ , 25  $^\circ\text{C}$ ,  $\delta$ ): 157.8, 155.4, 154.4, 153.7, 150.8, 148.1, 142.3, 142.1, 138.5, 137.4, 135.7, 133.2, 131.9, 131.7, 130.9, 130.3, 129.2, 128.8, 128.3, 126.7, 126.3, 124.8, 124.6, 123.5, 123.4, 123.3, 121.6, 118.1, 112.7. Anal: calcd for  $\text{C}_{31}\text{H}_{20}\text{N}_4\text{O}_2\text{PdS}$ : C, 60.15; H, 3.26; N, 9.05; found: C, 59.89; H, 3.09; N, 8.94.

**4-Chlorobenzenesulfonanilido palladium(II) complex S17**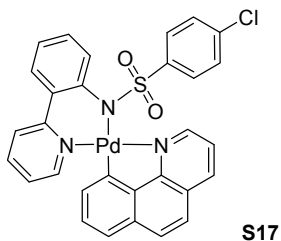

94% yield. NMR Spectroscopy:  $^1\text{H}$  NMR (500 MHz,  $\text{CDCl}_3$ , 25  $^\circ\text{C}$ ,  $\delta$ ): 9.63 (dd,  $J = 1.5$  Hz,  $J = 5.5$  Hz, 1H), 8.88 (dd,  $J = 2.0$  Hz,  $J = 5.5$  Hz, 1H), 8.31 (dd,  $J = 1.5$  Hz,  $J = 8.0$  Hz, 1H), 7.80–7.72 (m, 3H), 7.63 (dd,  $J = 8.0$  Hz,  $J = 8.0$  Hz, 1H), 7.60 (dd,  $J = 5.5$  Hz,  $J = 8.0$  Hz, 1H), 7.59 (dd,  $J = 9.0$  Hz,  $J = 12.5$  Hz, 2H), 7.48 (dd,  $J = 7.5$  Hz,  $J = 7.5$  Hz, 1H), 7.38–7.33 (m, 3H), 7.32 (dd,  $J = 8.0$  Hz,  $J = 8.0$  Hz, 1H), 7.19 (dd,  $J = 7.5$  Hz,  $J = 7.5$  Hz, 1H), 7.08 (d,  $J = 3.0$ , 1H), 6.99 (d,  $J = 7.0$  Hz, 1H), 6.90–6.89 (m, 2H).  $^{13}\text{C}$  NMR (125 MHz,  $\text{CDCl}_3$ , 25  $^\circ\text{C}$ ,  $\delta$ ): 157.8, 155.4, 154.9, 153.6, 150.9, 142.8, 142.4, 142.2, 138.4, 137.3, 136.2, 135.3, 133.2, 131.7, 130.9, 130.5, 129.2, 128.7, 128.3, 128.0, 127.1, 126.6, 124.9, 124.3, 123.5, 123.4, 123.2, 121.6. Mass Spectrometry: HRMS-FIA ( $m/z$ ): Calcd for  $[\text{C}_{30}\text{H}_{20}\text{ClN}_3\text{O}_2\text{PdS} + \text{H}]$ , 628.00723. Found, 628.00483.

**4-Fluorobenzenesulfonanilido palladium(II) complex S18**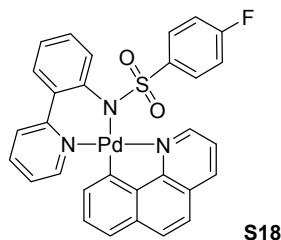

94% yield. NMR Spectroscopy:  $^1\text{H}$  NMR (500 MHz,  $\text{CDCl}_3$ , 25  $^\circ\text{C}$ ,  $\delta$ ): 9.64 (dd,  $J = 1.5$  Hz,  $J = 5.5$  Hz, 1H), 8.90 (dd,  $J = 1.0$  Hz,  $J = 6.0$  Hz, 1H), 8.30 (dd,  $J = 1.5$  Hz,  $J = 8.0$  Hz, 1H), 7.80 (d,  $J = 8.0$  Hz, 1H), 7.75–7.71 (m, 2H), 7.64 (dd,  $J = 8.0$  Hz,  $J = 5.5$  Hz, 1H), 7.58 (dd,  $J = 8.5$  Hz,  $J = 8.5$  Hz, 2H), 7.47 (ddd,  $J = 8.0$  Hz,  $J = 8.0$  Hz,  $J = 1.5$ , 1H), 7.38–7.28 (m, 5H), 7.19 (td,  $J = 7.5$  Hz,  $J = 1.0$  Hz, 1H), 7.08 (d,  $J = 8.5$ , 1H), 6.99 (d,  $J = 7.0$  Hz, 1H), 6.61 (dd,  $J = 8.5$  Hz,  $J = 8.5$  Hz, 2H).  $^{13}\text{C}$  NMR (125 MHz,  $\text{CDCl}_3$ , 25  $^\circ\text{C}$ ,  $\delta$ ): 163.1 (d,  $J = 248.5$  Hz), 157.9, 155.4, 154.9, 153.6, 150.9, 142.9, 142.2, 140.1 (d,  $J = 2.8$  Hz), 138.4, 137.3, 136.2, 133.1, 131.7, 130.9, 130.4, 129.1, 128.7, 128.2, 127.9 (d,  $J = 8.3$  Hz), 126.6, 124.8, 124.2, 123.5, 123.3, 123.1, 121.6, 114.7 (d,  $J = 21.9$  Hz).  $^{19}\text{F}$  NMR (375 MHz,  $\text{CDCl}_3$ , 23  $^\circ\text{C}$ ,  $\delta$ ): -111.7. Anal: calcd for  $\text{C}_{30}\text{H}_{20}\text{FN}_3\text{O}_2\text{PdS}$ : C, 58.88; H, 3.29; N, 6.87; found: C, 58.64; H, 3.15; N, 6.69.

**4-Phenylbenzenesulfonanilido palladium(II) complex S19**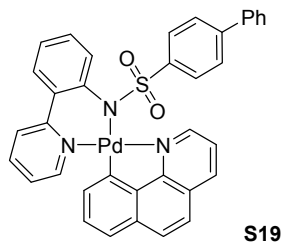

96% yield. NMR Spectroscopy:  $^1\text{H}$  NMR (500 MHz,  $\text{CDCl}_3$ , 25  $^\circ\text{C}$ ,  $\delta$ ): 9.68 (dd,  $J = 5.5$  Hz,  $J = 1.5$  Hz, 1H), 8.87 (d,  $J = 5.5$  Hz, 1H), 8.27 (dd,  $J = 8.0$  Hz,  $J = 1.5$  Hz, 1H), 7.85 (d,  $J = 8.0$  Hz, 1H), 7.70 (d,  $J = 9.0$  Hz, 1H), 7.63 (dd,  $J = 8.0$  Hz,  $J = 5.0$  Hz, 1H), 7.58–7.45 (m, 8H), 7.39–7.33 (m, 3H), 7.26–7.14 (m, 5H), 7.02 (d,  $J = 7.5$  Hz, 1H), 6.98 (d,  $J = 7.5$  Hz, 1H).  $^{13}\text{C}$  NMR (125 MHz,  $\text{CDCl}_3$ , 25  $^\circ\text{C}$ ,  $\delta$ ): 160.3, 155.4, 155.1, 153.6, 150.9, 143.1, 142.6, 142.2, 141.9, 140.1, 138.2, 137.2, 136.3, 133.1, 131.6, 130.9, 130.6, 129.1, 128.9, 128.6, 128.2, 127.8, 126.9, 126.6, 126.5, 126.1, 124.8, 124.2, 123.5, 123.1, 123.1, 121.6. Mass Spectrometry: HRMS-FIA ( $m/z$ ): Calcd for  $[\text{C}_{36}\text{H}_{25}\text{N}_3\text{O}_2\text{PdS} + \text{H}]$ , 670.07661. Found, 670.07661.

**Benzenesulfonanilido palladium(II) complex S20**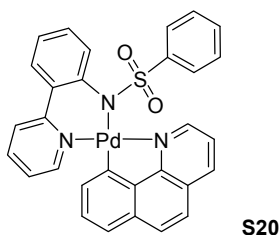

92% yield. NMR Spectroscopy:  $^1\text{H}$  NMR (500 MHz,  $\text{CDCl}_3$ , 25  $^\circ\text{C}$ ,  $\delta$ ): 9.67 (d,  $J = 5.0$  Hz, 1H), 8.87 (d,  $J = 5.5$  Hz, 1H), 8.27 (d,  $J = 8.0$  Hz, 1H), 7.82 (d,  $J = 8.0$  Hz, 1H), 7.71–7.55 (m, 5H), 7.47 (dd,  $J = 7.5$  Hz,  $J = 7.5$  Hz, 1H), 7.36–7.21 (m, 5H), 7.16 (dd,  $J = 7.5$  Hz,  $J = 7.5$  Hz, 1H), 7.06–6.98 (m, 3H), 6.95–6.92 (m, 2H).  $^{13}\text{C}$  NMR (125 MHz,  $\text{CDCl}_3$ , 25  $^\circ\text{C}$ ,  $\delta$ ): 157.8, 155.4, 155.1, 153.5, 151.0, 143.9, 143.2, 142.2, 138.4, 137.2, 136.3, 133.1, 131.5, 130.9, 130.3, 129.2, 129.0, 128.7, 128.2, 127.9, 126.6, 125.6, 124.7, 124.1, 123.5, 123.2, 123.1, 121.6. Anal: calcd for  $\text{C}_{30}\text{H}_{21}\text{N}_3\text{O}_2\text{PdS}$ : C, 60.66; H, 3.56; N, 7.07; found: C, 60.88; H, 3.39; N, 6.96.

**4-Toluenesulfonanilido palladium(II) complex S21**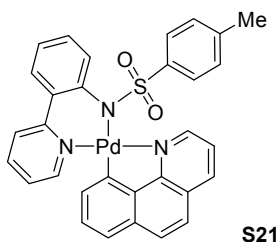

93% yield. NMR Spectroscopy:  $^1\text{H}$  NMR (500 MHz,  $\text{CDCl}_3$ , 25  $^\circ\text{C}$ ,  $\delta$ ): 9.68 (dd,  $J = 5.5$  Hz,  $J = 1.5$  Hz, 1H), 8.88 (dd,  $J = 6.0$  Hz,  $J = 1.5$  Hz, 1H), 8.29 (dd,  $J = 8.5$  Hz,  $J = 1.5$  Hz, 1H), 7.80 (dd,  $J = 8.5$  Hz,  $J = 1.5$  Hz, 1H), 7.71 (dd,  $J = 8.5$  Hz,  $J = 1.5$  Hz, 1H), 7.72 (d,  $J = 8.5$  Hz, 1H), 7.66–7.63 (m, 2H), 7.60–7.56 (m, 2H), 7.46–7.44 (m, 1H), 7.37–7.33 (m, 2H), 7.27–7.14 (m, 4H), 7.04 (d,  $J = 8.5$  Hz, 1H), 7.00 (d,  $J = 5.0$  Hz, 1H), 6.72 (d,  $J = 8.0$  Hz, 2H), 2.21 (s, 3H).  $^{13}\text{C}$  NMR (125 MHz,  $\text{CDCl}_3$ , 25  $^\circ\text{C}$ ,  $\delta$ ): 158.1, 155.7, 155.5, 153.8, 151.3, 143.6, 142.5, 141.3, 139.4, 138.2, 137.4, 136.6, 133.3, 131.8, 131.2, 130.7, 129.3, 128.9, 128.7, 128.4, 126.8, 125.9, 124.9, 124.2, 123.7, 123.4, 123.3, 121.8, 21.4. Mass Spectrometry: HRMS-FIA ( $m/z$ ): Calcd for  $[\text{C}_{31}\text{H}_{23}\text{N}_3\text{O}_2\text{PdS} + \text{H}]$ , 608.06186. Found, 608.05922.

**4-*tert*-Butylbenzenesulfonanilido palladium(II) complex S22**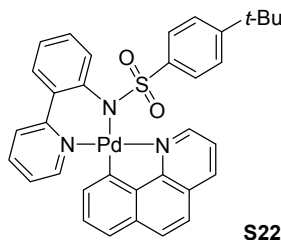

92% yield. NMR Spectroscopy:  $^1\text{H}$  NMR (500 MHz,  $\text{CDCl}_3$ , 25  $^\circ\text{C}$ ,  $\delta$ ): 9.68 (d,  $J = 5.5$  Hz, 1H), 8.90 (d,  $J = 5.5$  Hz, 1H), 8.29 (d,  $J = 8.0$  Hz, 1H), 7.83 (d,  $J = 7.5$  Hz, 1H), 7.72 (d,  $J = 8.5$  Hz, 1H), 7.66–7.55 (m, 4H), 7.47 (dd,  $J = 7.5$  Hz,  $J = 7.5$  Hz, 1H), 7.38–7.32 (m, 2H), 7.25–7.20 (m, 3H), 7.16 (dd,  $J = 7.5$  Hz,  $J = 7.5$  Hz, 1H), 7.04 (d,  $J = 8.5$  Hz, 1H), 7.00 (d,  $J = 5.0$  Hz, 1H), 6.95 (d,  $J = 8.0$  Hz, 2H), 1.23 (s, 9H).  $^{13}\text{C}$  NMR (125 MHz,  $\text{CDCl}_3$ , 25  $^\circ\text{C}$ ,  $\delta$ ): 157.9, 155.5, 155.3, 153.6, 152.2, 151.0, 143.3, 142.2, 141.1, 138.2, 137.2, 136.3, 133.1, 131.6, 130.9, 130.5, 129.0, 128.6, 128.2, 126.6, 125.4, 124.8, 124.5, 124.0, 123.5, 123.0, 123.0, 121.6, 34.5, 31.2. Mass Spectrometry: HRMS-FIA ( $m/z$ ): Calcd for  $[\text{C}_{34}\text{H}_{29}\text{N}_3\text{O}_2\text{PdS} + \text{H}]$ , 650.10936. Found, 650.10911.

**Synthesis of monofluoro Pd(IV) complexes with different sulfonanilide substitution**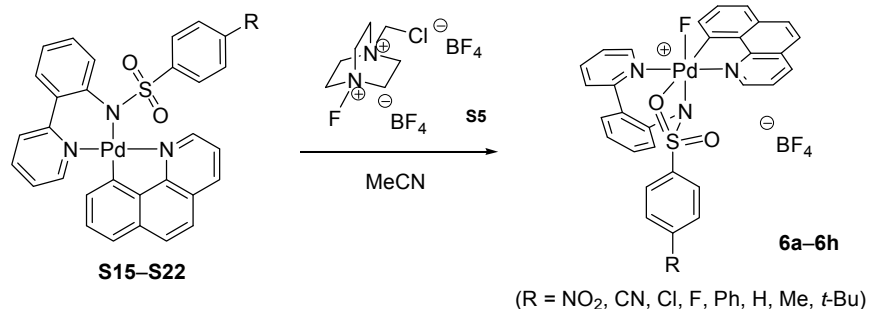

To benzo[*h*]quinolynyl palladium(II) pyridine-sulfonamido complex **S15–S22** (0.020 mmol, 1.0 equiv) in acetonitrile-*d*<sub>3</sub> (0.6 mL) at 23  $^\circ\text{C}$  was added 1-chloromethyl-4-fluoro-1,4-diazoniabicyclo [2.2.2]octane bis(tetrafluoroborate) (**S5**) (7.1 mg, 0.020 mmol, 1.0 equiv). After stirring for 10 min at 23  $^\circ\text{C}$ , the colorless suspension formed a dark purple solution. Compounds **6a–6h** were characterized by NMR spectroscopy in acetonitrile solution without purification.

**4-Nitrobenzenesulfonanilido palladium(IV) complex 6a**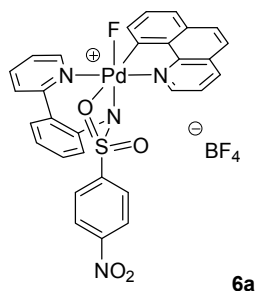

NMR Spectroscopy: <sup>1</sup>H NMR (600 MHz, acetonitrile-*d*<sub>3</sub>, 25 °C, δ): 9.66 (d, *J* = 6.0 Hz, 1H), 9.33 (d, *J* = 6.0 Hz, 1H), 8.89 (d, *J* = 7.8 Hz, 1H), 8.25 (dd, *J* = 8.4 Hz, *J* = 8.4 Hz, 1H), 8.07–7.96 (m, 6H), 7.83–7.78 (m, 2H), 7.75 (d, *J* = 7.8 Hz, 1H), 7.66 (dd, *J* = 7.8 Hz, *J* = 1.8 Hz, 1H), 7.40 (d, *J* = 9.0 Hz, 1H), 7.28 (ddd, *J* = 9.0 Hz, *J* = 9.0 Hz, *J* = 1.2 Hz, 1H), 7.03–7.00 (m, 2H), 6.74 (d, *J* = 7.8 Hz, 1H), 6.22 (d, *J* = 8.4 Hz, 1H). <sup>19</sup>F NMR (375 MHz, CDCl<sub>3</sub>, 23 °C, δ): –152.0 (s), –281.1 (br, s).

**4-Cyanobenzenesulfonanilido palladium(IV) complex 6b**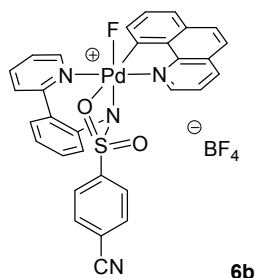

NMR Spectroscopy: <sup>1</sup>H NMR (600 MHz, acetonitrile-*d*<sub>3</sub>, 25 °C, δ): 9.65 (d, *J* = 5.4 Hz, 1H), 9.32 (d, *J* = 5.4 Hz, 1H), 8.88 (d, *J* = 8.4 Hz, 1H), 8.30 (dd, *J* = 7.8 Hz, *J* = 7.8, 1H), 8.06–8.04 (m, 3H), 7.99 (d, *J* = 8.4 Hz, 1H), 8.82 (ddd, *J* = 7.8 Hz, *J* = 7.8 Hz, *J* = 1.8 Hz, 1H), 7.74 (d, *J* = 7.8 Hz, 1H), 7.66 (dd, *J* = 7.8 Hz, *J* = 1.2 Hz, 1H), 7.54 (d, *J* = 8.4 Hz, 2H), 7.34–7.31 (m, 2H), 7.27 (ddd, *J* = 7.8 Hz, *J* = 7.8 Hz, *J* = 1.2 Hz, 1H), 7.02–6.98 (m, 2H), 6.72 (d, *J* = 6.72 Hz, 1H), 6.21 (d, *J* = 8.4 Hz, 1H). <sup>19</sup>F NMR (375 MHz, CDCl<sub>3</sub>, 23 °C, δ): –152.1 (s), –280.7 (br, s).

**4-Chlorobenzenesulfonanilido palladium(IV) complex 6c**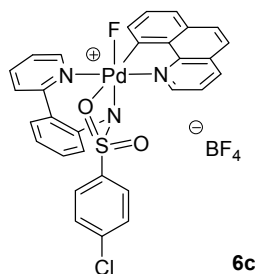

NMR Spectroscopy:  $^1\text{H}$  NMR (600 MHz, acetonitrile- $d_3$ , 25 °C,  $\delta$ ): 9.65 (d,  $J = 5.4$ , 1H), 9.36 (d,  $J = 6.0$  Hz, 1H), 8.87 (dd,  $J = 8.4$  Hz,  $J = 1.2$  Hz, 1H), 8.31 (dd,  $J = 7.2$  Hz,  $J = 7.2$  Hz, 1H), 8.05–8.03 (m, 2H), 7.98 (d,  $J = 9.0$ , 1H), 7.83 (ddd,  $J = 7.2$  Hz,  $J = 7.2$  Hz,  $J = 1.2$  Hz, 1H), 7.74 (d,  $J = 7.2$  Hz, 1H), 7.66 (dd,  $J = 7.8$  Hz,  $J = 1.8$  Hz, 1H), 7.24 (ddd,  $J = 7.8$  Hz,  $J = 7.8$  Hz,  $J = 0.6$  Hz, 1H), 7.20–7.19 (m, 5H), 7.02–6.95 (m, 2H), 6.73 (d,  $J = 8.4$  Hz, 1H), 6.21 (d,  $J = 8.4$  Hz, 1H).  $^{19}\text{F}$  NMR (375 MHz,  $\text{CDCl}_3$ , 23 °C,  $\delta$ ): –152.0 (s), –279.1 (br, s).

**4-Fluorobenzenesulfonanilido palladium(IV) complex 6d**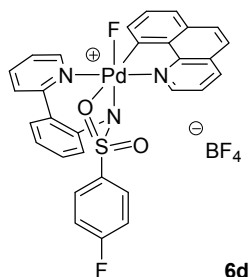

NMR Spectroscopy:  $^1\text{H}$  NMR (600 MHz, acetonitrile- $d_3$ , 25 °C,  $\delta$ ): 9.66 (d,  $J = 5.4$  Hz, 1H), 9.37 (d,  $J = 6.0$  Hz, 1H), 8.87 (d,  $J = 7.8$  Hz, 1H), 8.31 (dd,  $J = 7.8$  Hz,  $J = 7.8$  Hz, 1H), 8.10 (d,  $J = 7.8$  Hz, 1H), 8.05–8.03 (m, 2H), 7.98 (d,  $J = 9.0$  Hz, 1H), 7.83 (dd,  $J = 7.2$  Hz,  $J = 7.2$  Hz, 1H), 7.66 (dd,  $J = 8.4$  Hz,  $J = 4.8$  Hz, 1H), 7.27 (dd,  $J = 8.4$  Hz,  $J = 8.4$  Hz, 2H), 7.23 (dd,  $J = 7.2$  Hz,  $J = 7.2$  Hz, 1H), 7.01 (dd,  $J = 7.2$  Hz,  $J = 7.2$  Hz, 1H), 6.97–6.90 (m, 4H), 6.73 (d,  $J = 7.8$  Hz, 1H), 6.21 (d,  $J = 7.8$  Hz, 1H).  $^{19}\text{F}$  NMR (375 MHz,  $\text{CDCl}_3$ , 23 °C,  $\delta$ ): –107.9 (s), –152.1 (s), –278.6 (br, s).

**4-Phenylbenzenesulfonanilido palladium(IV) complex 6e**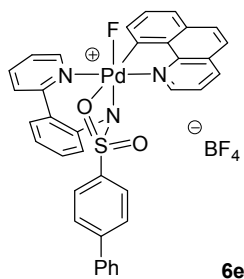

NMR Spectroscopy:  $^1\text{H}$  NMR (600 MHz, acetonitrile- $d_3$ , 25 °C,  $\delta$ ): 9.76 (d,  $J = 6.0$  Hz, 1H), 9.43 (d,  $J = 6.0$  Hz, 1H), 8.94 (d,  $J = 7.8$  Hz, 1H), 8.27 (dd,  $J = 7.2$  Hz,  $J = 7.2$  Hz, 1H), 8.13–8.09 (m, 3H), 8.05 (d,  $J = 8.4$  Hz, 1H), 7.87 (dd,  $J = 6.0$  Hz,  $J = 6.0$  Hz, 1H), 7.81 (d,  $J = 7.8$  Hz, 1H), 7.72 (d,  $J = 7.8$  Hz, 1H), 7.61 (d,  $J = 7.2$  Hz, 2H), 7.56–7.53 (m, 2H), 7.51–7.48 (m, 3H), 7.34–7.30 (m, 3H), 7.09–7.04 (m, 2H), 6.84 (d,  $J = 7.8$  Hz, 1H), 6.28 (d,  $J = 8.4$  Hz, 1H).  $^{19}\text{F}$  NMR (375 MHz,  $\text{CDCl}_3$ , 23 °C,  $\delta$ ): -152.1 (s), -278.5 (br, s).

**Benzenesulfonanilido palladium(IV) complex 6f**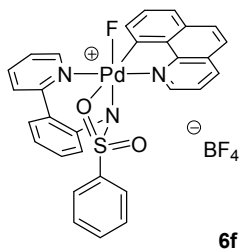

NMR Spectroscopy:  $^1\text{H}$  NMR (600 MHz, acetonitrile- $d_3$ , 25 °C,  $\delta$ ): 9.74 (d,  $J = 5.4$  Hz, 1H), 9.44 (d,  $J = 6.0$  Hz, 1H), 8.94 (d,  $J = 7.2$  Hz, 1H), 8.36 (dd,  $J = 7.8$  Hz,  $J = 7.8$  Hz, 1H), 8.14–8.10 (m, 3H), 8.05 (d,  $J = 9.0$  Hz, 1H), 7.89 (dd,  $J = 7.2$  Hz,  $J = 1.2$  Hz, 1H), 7.81 (d,  $J = 7.8$  Hz, 1H), 7.71 (dd,  $J = 8.4$  Hz,  $J = 1.8$  Hz, 1H), 7.45 (dd,  $J = 7.2$  Hz,  $J = 7.2$  Hz, 1H), 7.32–7.24 (m, 5H), 7.07 (t,  $J = 8.4$  Hz, 1H), 7.01 (ddd,  $J = 7.2$  Hz,  $J = 7.2$  Hz,  $J = 1.2$  Hz, 1H), 6.83 (d,  $J = 7.8$  Hz, 1H), 6.23 (d,  $J = 8.4$  Hz, 1H).  $^{19}\text{F}$  NMR (375 MHz,  $\text{CDCl}_3$ , 23 °C,  $\delta$ ): -152.1 (s), -278.2 (br, s).



**4-Toluenesulfonanilido palladium(IV) complex 6g**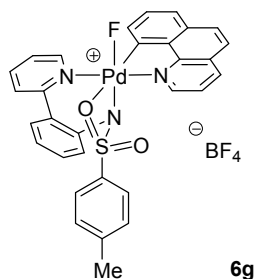

NMR Spectroscopy: <sup>1</sup>H NMR (600 MHz, acetonitrile-*d*<sub>3</sub>, 25 °C, δ): 9.73 (dd, *J* = 5.4 Hz, *J* = 0.6 Hz, 1H), 9.45 (d, *J* = 6.6 Hz, 1H), 8.93 (dd, *J* = 8.4 Hz, *J* = 1.2 Hz, 1H), 8.37 (dd, *J* = 7.8 Hz, *J* = 7.8 Hz, 1H), 8.13–8.09 (m, 3H), 8.04 (d, *J* = 9.0 Hz, 1H), 7.89 (dd, *J* = 7.8 Hz, *J* = 1.8 Hz, 1H), 7.80 (d, *J* = 7.8 Hz, 1H), 7.70 (dd, *J* = 7.8 Hz, *J* = 1.2 Hz, 1H), 7.26 (dd, *J* = 7.2 Hz, *J* = 7.2 Hz, 1H), 7.19 (d, *J* = 8.4 Hz, 2H), 7.08–7.04 (m, 3H), 6.99 (ddd, *J* = 8.4 Hz, *J* = 8.4 Hz, *J* = 1.8 Hz, 1H), 6.83 (d, *J* = 8.4 Hz, 1H), 6.27 (d, *J* = 9.0 Hz, 1H), 2.37 (s, 3H). <sup>19</sup>F NMR (375 MHz, CDCl<sub>3</sub>, 23 °C, δ): -152.0 (s), -277.6 (br, s).

**4-*tert*-Butylbenzenesulfonanilido palladium(IV) complex 6h**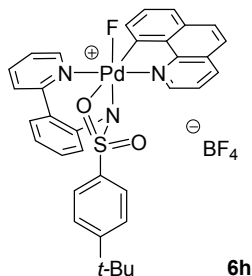

NMR Spectroscopy: <sup>1</sup>H NMR (500 MHz, acetonitrile-*d*<sub>3</sub>, 25 °C, δ): 9.67 (d, *J* = 5.5 Hz, 1H), 9.34 (d, *J* = 6.0 Hz, 1H), 8.86 (d, *J* = 8.0 Hz, 1H), 8.24 (dd, *J* = 7.0 Hz, *J* = 7.0 Hz, 1H), 8.05–7.96 (m, 4H), 7.78 (dd, *J* = 6.0 Hz, *J* = 6.0 Hz, 1H), 7.73 (d, *J* = 8.0 Hz, 1H), 7.64 (d, *J* = 8.0 Hz, 1H), 7.38–7.29 (m, 3H), 7.10 (d, *J* = 8.5 Hz, 2H), 7.03–6.95 (m, 2H), 6.73 (d, *J* = 8.5 Hz, 1H), 6.19 (d, *J* = 8.0 Hz, 1H), 1.22 (s, 9H). <sup>19</sup>F NMR (375 MHz, CDCl<sub>3</sub>, 23 °C, δ): -152.0 (s), -278.1 (br, s).

## Kinetic experiment of C–F reductive elimination from monofluoro palladium(IV) complexes

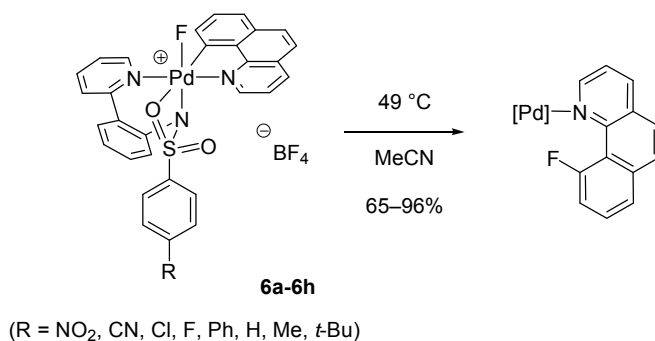

Solutions (33.3 mM) of compound **6a-6h** were prepared by reacting compounds **S15-S22** (0.020 mmol, 1.0 equiv) with 1-chloromethyl-4-fluoro-1,4-diazoniabicyclo [2.2.2]octane bis(tetrafluoroborate) (**S5**) (7.1 mg, 0.020 mmol, 1.0 equiv) in NMR tubes under nitrogen. NMR samples were placed in the preheated NMR machine (49 °C) and the disappearance of the compounds **6a-6h** and the formation of the product were monitored by integrating the peak at around 6.3 ppm and 9.1 ppm, respectively, relative to the peak of 1-chloromethyl-1,4-diazoniabicyclo [2.2.2]octane (tetrafluoroborate) at 4.91 ppm. Rates of starting material decomposition and rates of product formation corrected for the appropriate yield at time infinity were identical. The plots for product formation are shown below.

**R = NO<sub>2</sub>**

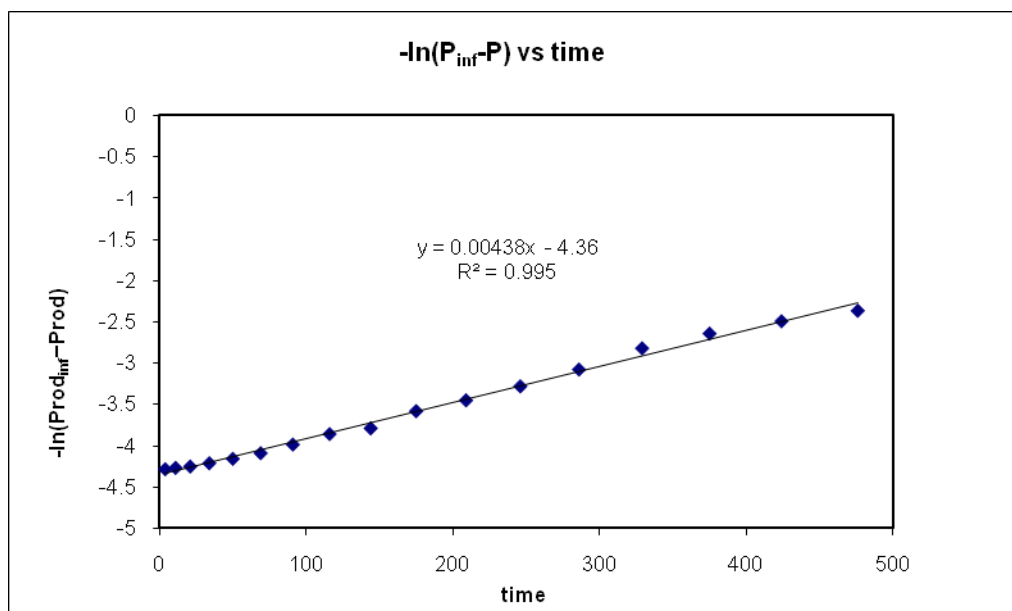

R = CN

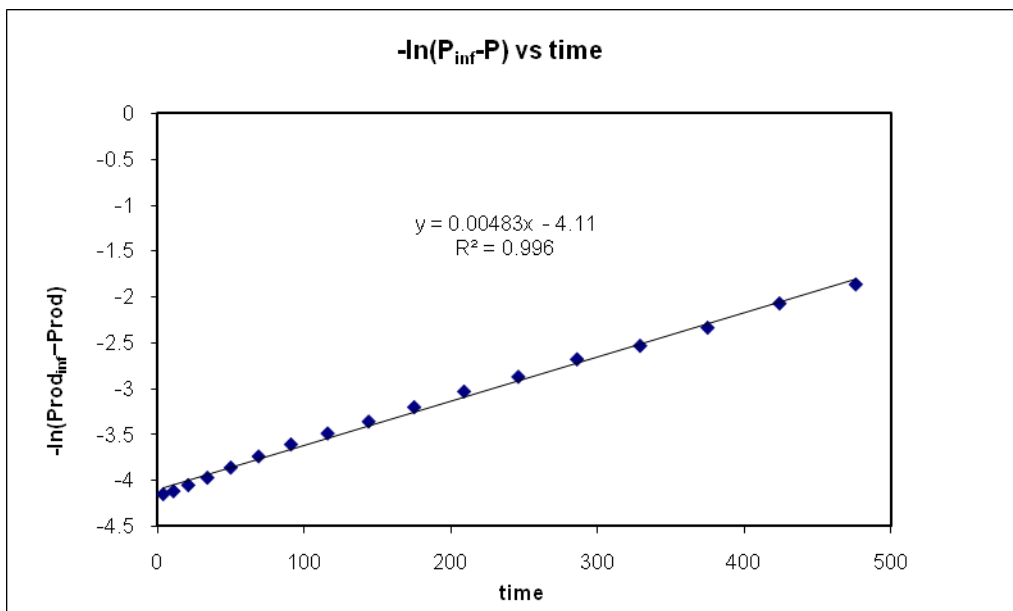

R = Cl

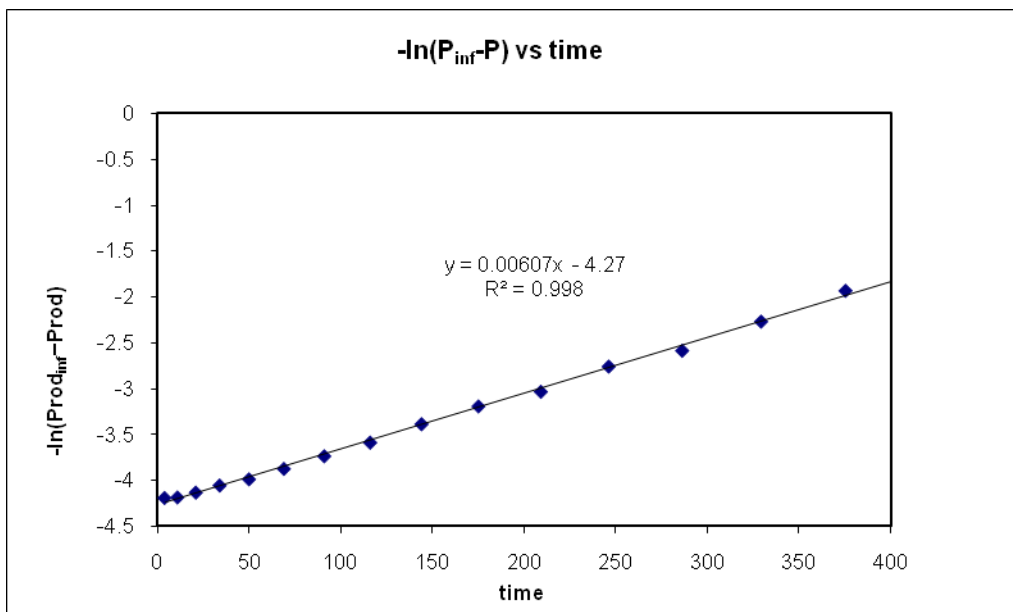

**R = F**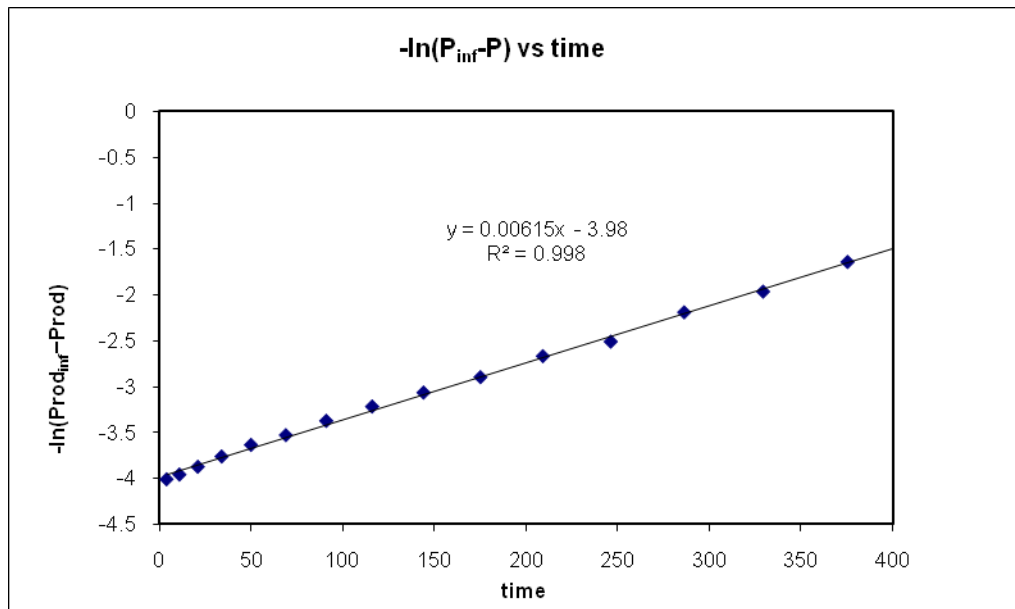**R = Ph**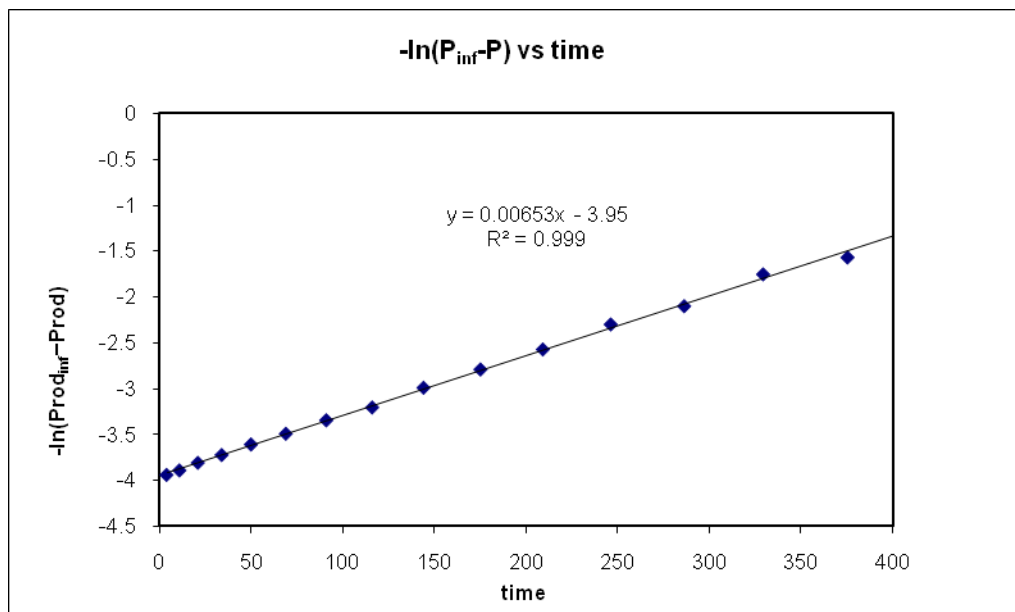

**R = H**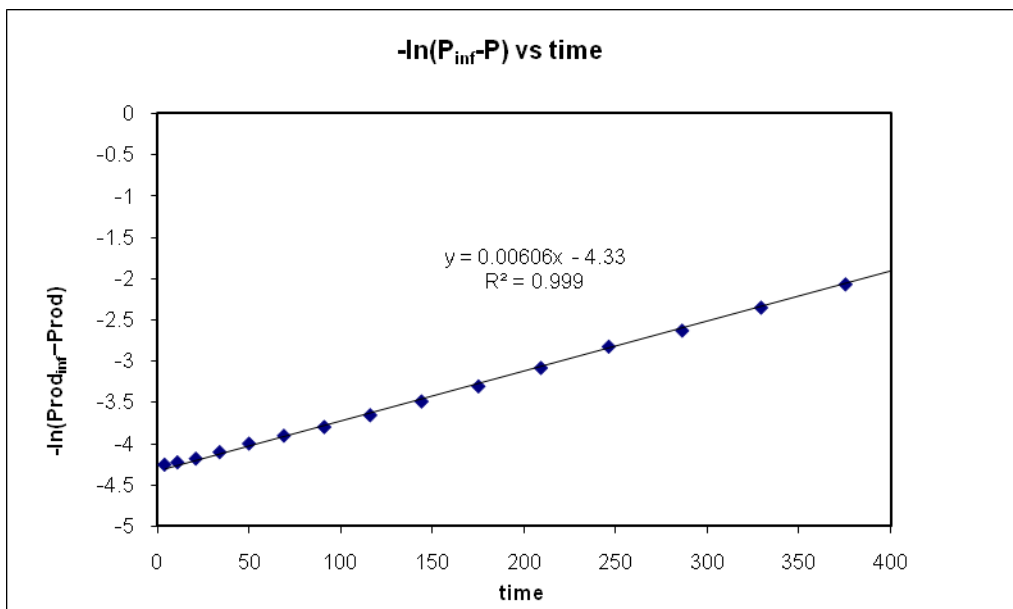**R = Me**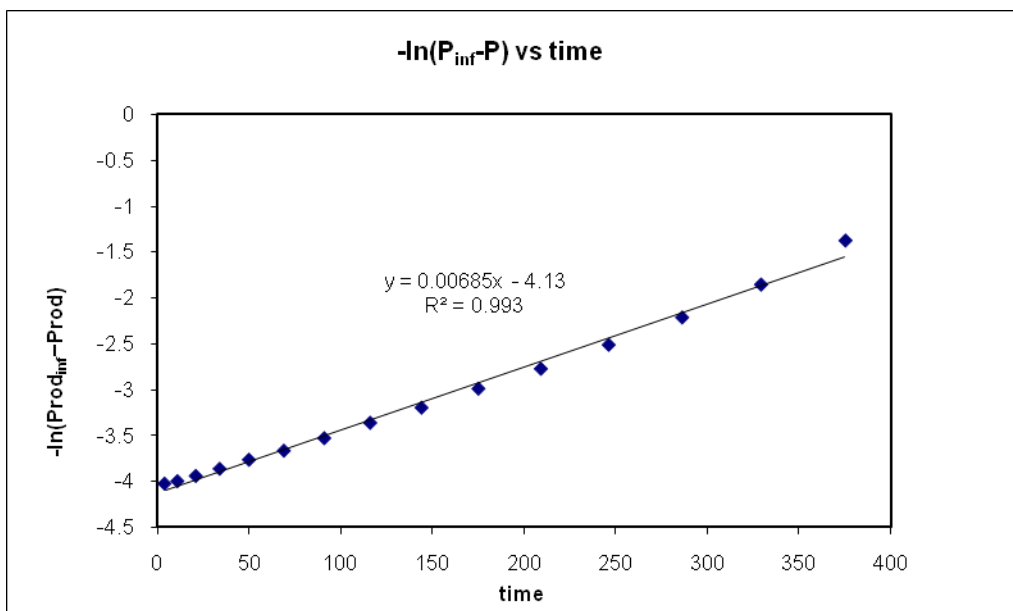

**R = *t*-Bu**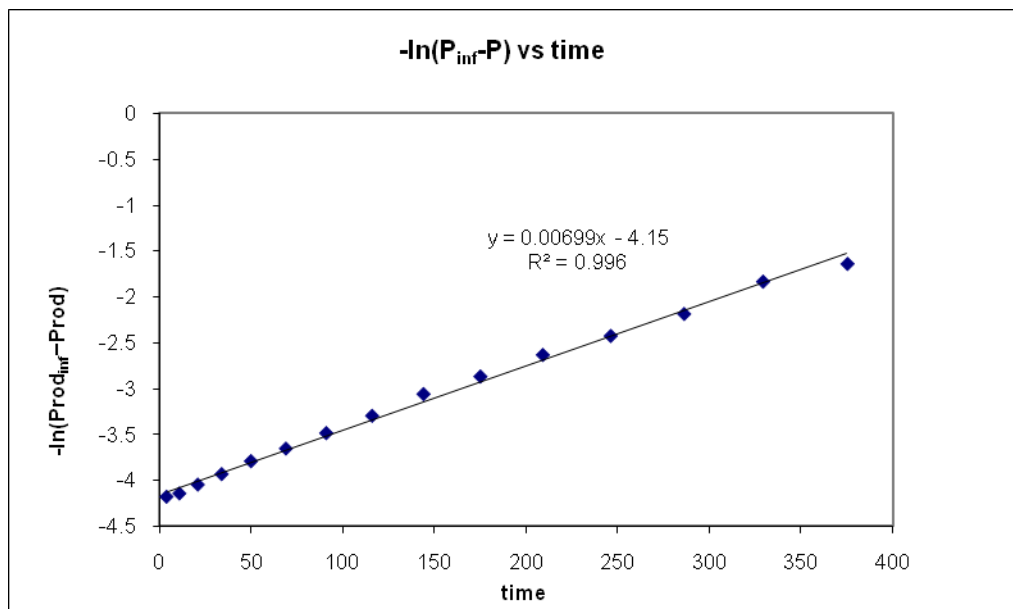

| R               | $\sigma$ | k       | $\ln(k_X/k_H)$ | Fluorination Yield (%) |
|-----------------|----------|---------|----------------|------------------------|
| NO <sub>2</sub> | 0.78     | 0.00438 | -0.325         | 96                     |
| CN              | 0.66     | 0.00483 | -0.228         | 92                     |
| Cl              | 0.23     | 0.00607 | 0.00150        | 85                     |
| F               | 0.15     | 0.00615 | 0.0134         | 87                     |
| Ph              | -0.01    | 0.00653 | 0.0736         | 89                     |
| H               | 0        | 0.00606 | 0.0000         | 75                     |
| Me              | -0.17    | 0.00685 | 0.122          | 71                     |
| <i>t</i> -Bu    | -0.20    | 0.00699 | 0.142          | 65                     |

A lower fluorination yield was observed for more electron-donating substituents. This may be due to the competing N-F reductive elimination because more nucleophilic amides undergo reductive elimination more readily (for example, see: Hartwig, J. F. *Synlett* **2006**, 1283–1294). From the reaction of **6h**, free ligand **S14** was isolated in ca. 10%, whereas no free ligand **S7** was observed from the reaction of **6a**. The formation of the free ligand may be due to the N-F reductive elimination and subsequent decomposition of N-fluoro compounds.

## Hammett plot for pyridine substitution

### Synthesis of pyridinylsulfonanilide ligands with different pyridine substitution

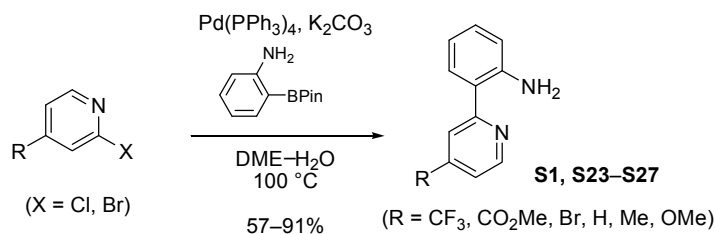

Under air, to a substituted 2-bromopyridine<sup>10</sup> (1.00 mmol, 1.00 equiv) in DME–H<sub>2</sub>O (1:1, 5 mL) at 23 °C was added K<sub>2</sub>CO<sub>3</sub> (207 mg, 1.50 mmol, 1.50 equiv), 2-aminophenylboronic acid pinacol ester (219 mg, 1.00 mmol, 1.00 equiv), and tetrakis(triphenylphosphine)palladium (57.8 mg, 0.0500 mmol, 5.00 mol%). The reaction mixture was stirred at 100 °C for 3.0 h. After cooling to 23 °C, the phases were separated and the aqueous phase was extracted with EtOAc (3 × 2 mL). The combined organic phases were washed with brine (5 mL) and dried (Na<sub>2</sub>SO<sub>4</sub>). The filtrate was concentrated in vacuo and the residue was purified by chromatography on silica gel to afford the correspondingly substituted 2-(2-pyridinyl)aniline (57–91% yield).

#### 2-(2-(4-trifluoromethylpyridinyl)aniline) (S23)

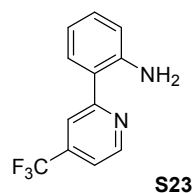

R<sub>f</sub> = 0.20 (hexanes/EtOAc 85:15 (v/v)). 91% yield. NMR Spectroscopy: <sup>1</sup>H NMR (500 MHz, CDCl<sub>3</sub>, 25 °C, δ): 8.77 (d, *J* = 6.5 Hz, 1H), 7.91 (s, 1H), 7.58 (d, *J* = 9.5 Hz, 1H), 7.38 (d, *J* = 6.0 Hz, 1H), 7.23 (dd, *J* = 5.0 Hz, 5.0 Hz, 1H), 6.84–6.77 (m, 2H) 5.80 (br s, 2H). <sup>13</sup>C NMR (125 MHz, CDCl<sub>3</sub>, 25 °C, δ): 160.6, 148.7, 146.8, 138.9 (q, 33.5 Hz), 130.74, 129.3, 122.9 (q, 273 Hz), 120.4, 117.7, 117.5 (q, *J* = 3.6 Hz) 117.4, 116.0 (q, *J* = 3.6 Hz). <sup>19</sup>F NMR (375 MHz, CDCl<sub>3</sub>, 23 °C, δ): –65.2. Mass Spectrometry: HRMS-FIA (m/z): Calcd for [C<sub>12</sub>H<sub>9</sub>F<sub>3</sub>N<sub>2</sub> + H], 239.07906. Found, 239.07887.

<sup>10</sup> 2-Chloro-4-methoxypyridine was used for the synthesis of S27

**Methyl 2-(2-aminophenyl)pyridine-4-carboxylate (S24)**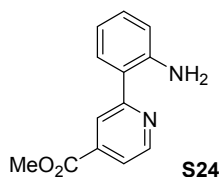

$R_f$  = 0.50 (hexanes/EtOAc 7:3 (v/v)). 57% yield. NMR Spectroscopy:  $^1\text{H}$  NMR (500 MHz,  $\text{CDCl}_3$ , 25 °C,  $\delta$ ): 8.74 (d,  $J$  = 5.5 Hz, 1H), 8.26 (s, 1H), 7.70 (dd,  $J$  = 5.0 Hz,  $J$  = 1.5 Hz, 1H), 7.62 (dd,  $J$  = 8.0 Hz,  $J$  = 1.5 Hz, 1H), 7.20 (ddd,  $J$  = 7.5 Hz,  $J$  = 7.5 Hz,  $J$  = 1.0 Hz, 1H), 6.82–6.76 (m, 2H), 5.79 (br s, 2H), 3.98 (s, 3H).  $^{13}\text{C}$  NMR (125 MHz,  $\text{CDCl}_3$ , 25 °C,  $\delta$ ): 165.7, 160.4, 148.5, 146.7, 138.1, 130.4, 129.4, 121.4, 121.0, 119.7, 117.6, 117.3, 52.7. Mass Spectrometry: HRMS-FIA ( $m/z$ ): Calcd for  $[\text{C}_{13}\text{H}_{12}\text{N}_2\text{O}_2 + \text{H}]$ , 229.09715. Found, 229.09741.

**2-(2-(4-bromopyridinyl)aniline (S25)**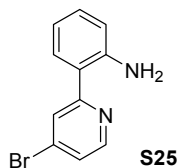

$R_f$  = 0.20 (hexanes/EtOAc 9:1 (v/v)). 80% yield. NMR Spectroscopy:  $^1\text{H}$  NMR (500 MHz,  $\text{CDCl}_3$ , 25 °C,  $\delta$ ): 8.41 (d,  $J$  = 5.0 Hz, 1H), 7.85 (d,  $J$  = 1.5 Hz, 1H), 7.50 (dd,  $J$  = 8.0 Hz,  $J$  = 1.5 Hz, 1H), 7.33 (dd,  $J$  = 5.5 Hz,  $J$  = 2.0 Hz, 1H), 7.19 (ddd,  $J$  = 8.5 Hz,  $J$  = 7.0 Hz,  $J$  = 1.5 Hz, 1H), 6.80–6.74 (m, 2H), 5.74 (br s, 2H).  $^{13}\text{C}$  NMR (125 MHz,  $\text{CDCl}_3$ , 25 °C,  $\delta$ ): 160.6, 148.4, 146.7, 133.4, 130.4, 129.2, 125.1, 123.9, 120.4, 117.5, 117.2. Mass Spectrometry: HRMS-FIA ( $m/z$ ): Calcd for  $[\text{C}_{11}\text{H}_9\text{BrN}_2 + \text{H}]$ , 249.00219. Found, 249.00219.

**2-(2-(4-methylpyridinyl)aniline (S26)**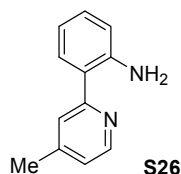

$R_f$  = 0.15 (hexanes/EtOAc 9:1 (v/v)). 65% yield. NMR Spectroscopy:  $^1\text{H}$  NMR (500 MHz,  $\text{CDCl}_3$ , 25 °C,  $\delta$ ): 8.48 (d,  $J$  = 5.0 Hz, 1H), 7.52 (dd,  $J$  = 8.0 Hz,  $J$  = 1.5 Hz, 1H), 7.47 (s, 1H), 7.18 (ddd,  $J$  = 6.5 Hz,  $J$  = 6.5 Hz,  $J$  = 1.0 Hz, 1H), 7.00 (d,  $J$  = 5.0 Hz, 1H), 6.82–6.75 (m, 2H), 5.79 (br s, 2H), 2.39 (s, 3H).  $^{13}\text{C}$  NMR (125 MHz,  $\text{CDCl}_3$ , 25 °C,  $\delta$ ): 159.1, 147.7, 147.5, 146.5, 129.6, 129.2, 122.9, 122.3, 121.9, 117.4,



117.0, 21.1. Mass Spectrometry: HRMS-FIA (m/z): Calcd for [C<sub>12</sub>H<sub>12</sub>N<sub>2</sub> + H], 185.10732. Found, 185.10766.

### 2-(2-(4-methoxypyridinyl)aniline (S27)

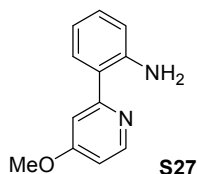

R<sub>f</sub> = 0.20 (hexanes/EtOAc 7:3 (v/v)). 80% yield. NMR Spectroscopy: <sup>1</sup>H NMR (500 MHz, CDCl<sub>3</sub>, 25 °C, δ): 8.42 (d, *J* = 6.0 Hz, 1H), 7.46 (d, *J* = 7.5 Hz, 1H), 7.16 (dd, *J* = 7.5 Hz, *J* = 7.5 Hz, 1H), 7.12 (d, *J* = 2.0 Hz, 1H), 6.80–6.72 (m, 3H), 5.50 (br s, 2H), 3.88 (s, 3H). <sup>13</sup>C NMR (125 MHz, CDCl<sub>3</sub>, 25 °C, δ): 166.4, 161.0, 149.2, 146.3, 129.8, 129.3, 122.6, 117.6, 117.0, 108.0, 107.7, 55.0. Mass Spectrometry: HRMS-FIA (m/z): Calcd for [C<sub>12</sub>H<sub>12</sub>N<sub>2</sub>O + H], 201.10224. Found, 201.10255.

### Synthesis of pyridinylsulfonanilide ligands with different pyridine substitution

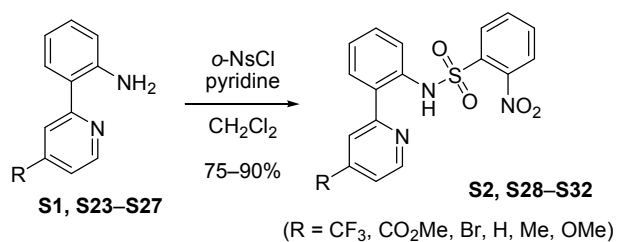

To a substituted 2-(2-pyridinyl)aniline **S1**, **S23–S26** (1.00 mmol, 1.00 equiv) in CH<sub>2</sub>Cl<sub>2</sub> (3 mL) at 0 °C was added pyridine (119 mg, 121 μL, 1.50 mmol, 1.50 equiv) and a 2-nitrobenzenesulfonyl chloride (310 mg, 1.40 mmol, 1.40 equiv). The reaction mixture was warmed to 23 °C and stirred for 2.0 hr before the addition of water (3 mL). The phases were separated and the aqueous layer was extracted with CH<sub>2</sub>Cl<sub>2</sub> (3 × 2 mL). The combined organic phases were washed with brine (5 mL) and dried (Na<sub>2</sub>SO<sub>4</sub>). The filtrate was concentrated in vacuo and the residue was purified by chromatography on silica gel to afford the corresponding substituted 2-(2-pyridinyl)-2-nitrobenzenesulfonanilide (75–90% yield).

**2-(2-(4-trifluoromethylpyridinyl)-2-nitrobenzenesulfonamide) (S28)**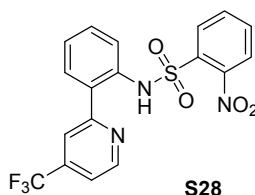

$R_f = 0.35$  (hexanes/EtOAc 7:3 (v/v)). 90% yield. NMR Spectroscopy:  $^1\text{H}$  NMR (500 MHz,  $\text{CDCl}_3$ , 25 °C,  $\delta$ ): 12.00 (s, 1H), 8.92 (d,  $J = 5.5$  Hz, 1H), 7.87–7.85 (m, 2H), 7.64 (s, 1H), 7.61–7.54 (m, 4H), 7.48–7.44 (m, 2H), 7.26 (ddd,  $J = 6.5$  Hz,  $J = 6.5$  Hz,  $J = 1.0$  Hz, 1H).  $^{13}\text{C}$  NMR (125 MHz,  $\text{CDCl}_3$ , 25 °C,  $\delta$ ): 158.0, 149.3, 147.6, 139.8 (q,  $J = 16.8$ ), 135.8, 133.6, 132.7, 132.0, 131.0, 130.8, 129.1, 127.0, 125.2, 124.7, 123.6, 122.9, 121.4, 117.6. Mass Spectrometry: HRMS-FIA ( $m/z$ ): Calcd for  $[\text{C}_{18}\text{H}_{12}\text{F}_3\text{N}_3\text{O}_4\text{S} + \text{Na}]$ , 446.03928. Found, 446.03807.

**Methyl 2-(2-(2-nitrobenzenesulfonylamidophenyl)pyridine-4-carboxylate) (S29)**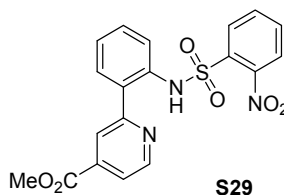

$R_f = 0.12$  (hexanes/EtOAc 7:3 (v/v)). 83% yield. NMR Spectroscopy:  $^1\text{H}$  NMR (500 MHz,  $\text{CDCl}_3$ , 25 °C,  $\delta$ ): 12.48 (s, 1H), 8.87 (d,  $J = 5.0$  Hz, 1H), 8.07 (s, 1H), 7.91 (dd,  $J = 6.5$  Hz,  $J = 3.0$  Hz, 1H), 7.84 (d,  $J = 8.5$  Hz, 1H), 7.77 (dd,  $J = 5.0$  Hz,  $J = 1.5$  Hz, 1H), 7.67 (dd,  $J = 8.0$  Hz,  $J = 1.5$  Hz, 1H), 7.57–7.54 (m, 3H), 7.41 (ddd,  $J = 8.8$  Hz,  $J = 8.8$  Hz,  $J = 1.5$  Hz, 1H), 7.22 (ddd,  $J = 8.0$  Hz,  $J = 8.0$  Hz,  $J = 1.0$  Hz, 1H), 3.97 (s, 3H).  $^{13}\text{C}$  NMR (125 MHz,  $\text{CDCl}_3$ , 25 °C,  $\delta$ ): 165.1, 157.6, 148.8, 147.6, 138.8, 135.8, 135.9, 133.5, 132.9, 132.0, 130.6, 129.1, 126.6, 124.8, 124.8, 121.9, 121.3, 121.1, 52.9. Mass Spectrometry: HRMS-FIA ( $m/z$ ): Calcd for  $[\text{C}_{19}\text{H}_{15}\text{N}_3\text{O}_6\text{S} + \text{H}]$ , 414.07543. Found, 414.07512.

**2-(2-(4-bromopyridinyl)-2-nitrobenzenesulfonamide) (S30)**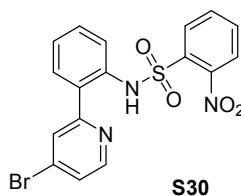

$R_f = 0.30$  (hexanes/EtOAc 7:3 (v/v)). 80% yield. NMR Spectroscopy:  $^1\text{H}$  NMR (500 MHz,  $\text{CDCl}_3$ , 25 °C,

$\delta$ ): 12.22 (s, 1H), 8.54 (d,  $J = 5.5$  Hz, 1H), 7.87 (d,  $J = 7.5$  Hz, 1H), 7.83 (dd,  $J = 8.5$  Hz,  $J = 1.0$  Hz, 1H), 7.62–7.53 (m, 5H), 7.44–7.40 (m, 2H), 7.21 (ddd,  $J = 8.0$  Hz,  $J = 8.0$  Hz,  $J = 1.0$  Hz, 1H).  $^{13}\text{C}$  NMR (125 MHz,  $\text{CDCl}_3$ , 25 °C,  $\delta$ ): 157.8, 148.8, 147.6, 135.9, 134.2, 133.5, 132.9, 132.0, 130.8, 130.7, 128.9, 126.7, 125.4, 125.2, 125.0, 124.8, 122.6. Mass Spectrometry: HRMS-FIA ( $m/z$ ): Calcd for  $[\text{C}_{17}\text{H}_{12}\text{BrN}_3\text{O}_4\text{S} + \text{H}]$ , 433.98047. Found, 433.98002.

### 2-(2-(4-methylpyridinyl)-2-nitrobenzenesulfonamide (S31)

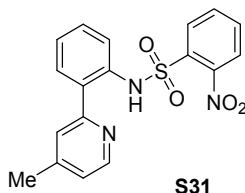

$R_f = 0.15$  (hexanes/EtOAc 7:3 (v/v)). 75% yield. NMR Spectroscopy:  $^1\text{H}$  NMR (500 MHz,  $\text{CDCl}_3$ , 25 °C,  $\delta$ ): 13.18 (s, 1H), 8.52 (d,  $J = 5.0$  Hz, 1H), 7.90 (dd,  $J = 7.0$  Hz,  $J = 1.5$  Hz, 1H), 7.78 (dd,  $J = 8.5$  Hz,  $J = 1.5$  Hz, 1H), 7.62–7.52 (m, 4H), 7.37–7.33 (m, 2H), 7.16 (ddd,  $J = 7.5$  Hz,  $J = 7.5$  Hz,  $J = 1.5$  Hz, 1H), 7.05 (dd,  $J = 5.5$  Hz,  $J = 1.5$  Hz, 1H), 3.35 (s, 3H).  $^{13}\text{C}$  NMR (125 MHz,  $\text{CDCl}_3$ , 25 °C,  $\delta$ ): 156.3, 149.0, 147.7, 147.3, 136.2, 133.2, 133.1, 131.9, 130.6, 129.9, 128.6, 126.8, 124.6, 124.4, 123.2, 122.4, 121.5, 21.3. Mass Spectrometry: HRMS-FIA ( $m/z$ ): Calcd for  $[\text{C}_{18}\text{H}_{15}\text{N}_3\text{O}_4\text{S} + \text{Na}]$ , 392.06755. Found, 392.06758.

### 2-(2-(4-methoxypyridinyl)-2-nitrobenzenesulfonamide (S32)

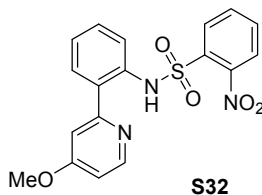

$R_f = 0.15$  (hexanes/EtOAc 7:3 (v/v)). 70% yield. NMR Spectroscopy:  $^1\text{H}$  NMR (500 MHz,  $\text{CDCl}_3$ , 25 °C,  $\delta$ ): 13.22 (s, 1H), 8.54 (d,  $J = 6.0$  Hz, 1H), 7.93 (dd,  $J = 7.0$  Hz,  $J = 1.5$  Hz, 1H), 7.79 (d,  $J = 8.0$  Hz, 1H), 7.63–7.53 (m, 4H), 7.36 (dd,  $J = 7.5$  Hz,  $J = 7.5$  Hz, 1H), 7.16 (dd,  $J = 7.5$  Hz,  $J = 7.5$  Hz, 1H), 7.01 (d,  $J = 2.0$  Hz, 1H), 6.78 (dd,  $J = 7.0$  Hz,  $J = 2.0$  Hz, 1H), 3.87 (s, 3H).  $^{13}\text{C}$  NMR (125 MHz,  $\text{CDCl}_3$ , 25 °C,  $\delta$ ): 166.8, 158.2, 149.2, 147.8, 136.4, 133.4, 133.2, 131.9, 130.7, 130.2, 128.6, 126.8, 124.7, 124.3, 121.5, 108.2, 107.9, 55.3. Mass Spectrometry: HRMS-FIA ( $m/z$ ): Calcd for  $[\text{C}_{18}\text{H}_{15}\text{N}_3\text{O}_5\text{S} + \text{H}]$ , 386.08052. Found, 386.08000.

## Synthesis of Pd(II) complexes with different pyridine substitution

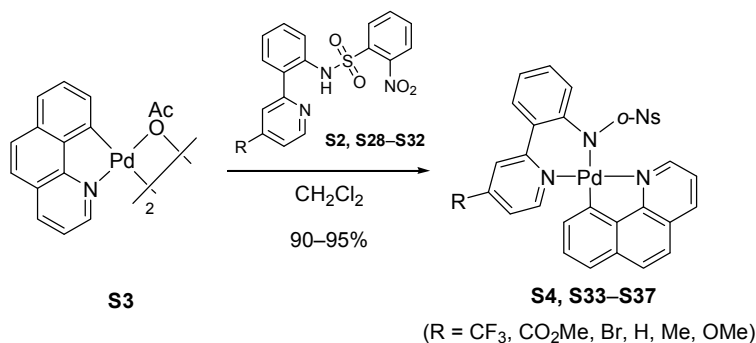

To benzo[*h*]quinolinyne palladium acetate dimer (**S3**) (100 mg, 0.145 mmol, 1.00 equiv) in CH<sub>2</sub>Cl<sub>2</sub> (2 mL) at 23 °C was added a substituted pyridinylsulfonanilide ligand **S2**, **S28–S32** (0.291 mmol, 2.00 equiv). After stirring for 1.0 hr the reaction mixture was concentrated in vacuo. The resulting residue was triturated with Et<sub>2</sub>O (3 × 1 mL) to afford the corresponding substituted palladium(II) complex (90–95% yield).

### 4-Trifluoromethylpyridinyl palladium(II) complex S33

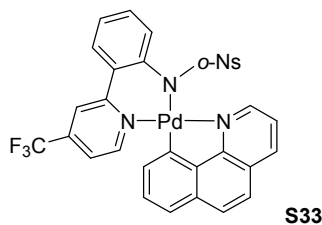

90% yield. NMR Spectroscopy: <sup>1</sup>H NMR (500 MHz, CDCl<sub>3</sub>, 25 °C, δ): 9.52 (dd, *J* = 5.0 Hz, *J* = 1.0 Hz, 1H), 9.23 (d, *J* = 6.0 Hz, 1H), 8.32 (dd, *J* = 8.0 Hz, *J* = 1.0 Hz, 1H), 7.78 (d, *J* = 8.0 Hz, 1H), 7.74 (d, *J* = 8.5 Hz, 1H), 7.64–7.57 (m, 3H), 7.47–7.42 (m, 2H), 7.39–7.34 (m, 3H), 7.30–7.21 (m, 3H), 7.16 (ddd, *J* = 7.5 Hz, *J* = 7.5 Hz, *J* = 1.0 Hz, 1H), 7.03 (dd, *J* = 6.5 Hz, *J* = 6.5 Hz, 1H), 6.93 (d, *J* = 7.0 Hz, 1H). <sup>19</sup>F NMR (375 MHz, CDCl<sub>3</sub>, 23 °C, δ): –65.2. Anal: calcd for C<sub>31</sub>H<sub>19</sub>F<sub>3</sub>N<sub>4</sub>O<sub>2</sub>PdS: C, 52.66; H, 2.71; N, 7.92; found: C, 52.41; H, 2.48; N, 7.73.<sup>11</sup>

<sup>11</sup> The <sup>13</sup>C NMR spectrum of this compound has a low signal-to-noise ratio due to the low solubility in common organic solvents.

**4-Methoxycarbonylpyridinyl palladium(II) complex S34**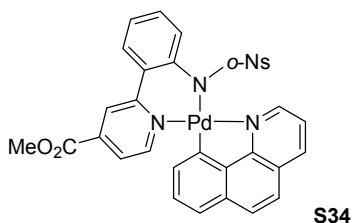

93% yield. NMR Spectroscopy:  $^1\text{H}$  NMR (500 MHz,  $\text{CDCl}_3$ , 23 °C,  $\delta$ ): 9.56 (dd,  $J = 5.5$  Hz,  $J = 1.0$  Hz, 1H), 9.15 (d,  $J = 7.0$  Hz, 1H), 8.30 (dd,  $J = 8.5$  Hz,  $J = 1.0$  Hz, 1H), 7.76–7.72 (m, 2H), 7.69–7.68 (m, 2H), 7.63–7.58 (m, 3H), 7.53 (ddd,  $J = 8.5$  Hz,  $J = 8.5$  Hz,  $J = 1.0$  Hz, 1H), 7.47–7.45 (m, 2H), 7.36 (dd,  $J = 8.0$  Hz,  $J = 8.0$  Hz, 1H), 7.28–7.27 (m, 1H), 7.15–7.12 (m, 2H), 7.01–6.99 (m, 1H), 6.96 (d,  $J = 7.0$  Hz, 1H), 4.02 (s, 3H). Anal: calcd for  $\text{C}_{32}\text{H}_{22}\text{N}_4\text{O}_6\text{PdS}$ : C, 55.14; H, 3.18; N, 8.04; found: C, 55.28; H, 3.06; N, 7.99.<sup>11</sup>

**4-Bromopyridinyl palladium(II) complex S35**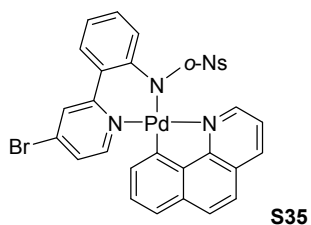

95% yield. NMR Spectroscopy:  $^1\text{H}$  NMR (500 MHz,  $\text{CDCl}_3$ , 25 °C,  $\delta$ ): 9.51 (d,  $J = 5.5$  Hz, 1H), 8.83 (d,  $J = 6.0$  Hz, 1H), 8.30 (d,  $J = 8.0$  Hz, 1H), 7.74–7.72 (m, 2H), 7.62–7.58 (m, 3H), 7.50 (dd,  $J = 7.5$  Hz,  $J = 7.5$  Hz, 1H), 7.39–7.34 (m, 3H), 7.23–7.19 (m, 2H), 7.15 (dd,  $J = 8.0$  Hz,  $J = 8.0$  Hz, 1H), 7.05–7.02 (m, 2H), 6.98–6.97 (m, 2H). Anal: calcd for  $\text{C}_{30}\text{H}_{19}\text{BrN}_4\text{O}_4\text{PdS}$ : C, 50.19; H, 2.67; N, 7.80; found: C, 49.95; H, 2.39; N, 7.69.<sup>11</sup>

**4-Methylpyridinyl palladium(II) complex S36**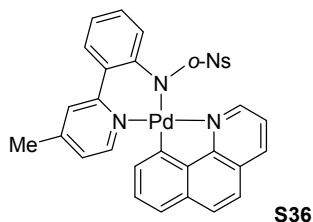

91% yield. NMR Spectroscopy:  $^1\text{H}$  NMR (500 MHz,  $\text{CDCl}_3$ , 23 °C,  $\delta$ ): 9.54 (d,  $J = 5.5$  Hz, 1H), 8.82 (d,  $J = 5.5$  Hz, 1H), 8.29 (d,  $J = 8.0$  Hz, 1H), 7.74–7.71 (m, 2H), 7.63–7.54 (m, 4H), 7.48 (dd,  $J = 7.0$  Hz,  $J = 7.0$  Hz, 1H), 7.39–7.34 (m, 2H), 7.23–7.19 (m, 2H), 7.15 (dd,  $J = 8.0$  Hz,  $J = 8.0$  Hz, 1H), 7.05–7.02 (m,

2H), 6.98–6.97 (m, 2H), 2.30 (s, 3H). Mass Spectrometry: HRMS-FIA (m/z): Calcd for  $[\text{C}_{31}\text{H}_{22}\text{N}_4\text{O}_4\text{PdS} + \text{H}]$ , 653.04748. Found, 653.04758.<sup>11</sup>

#### 4-Methoxypyridinyl palladium(II) complex **S37**

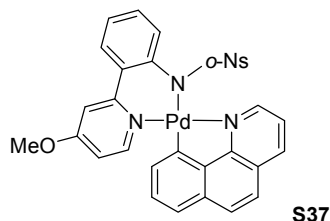

90% yield. NMR Spectroscopy:  $^1\text{H}$  NMR (500 MHz,  $\text{CDCl}_3$ , 23 °C,  $\delta$ ): 9.54 (d,  $J = 5.0$  Hz, 1H), 8.77 (d,  $J = 6.5$  Hz, 1H), 8.28 (d,  $J = 8.0$  Hz, 1H), 7.74–7.71 (m, 2H), 7.61–7.55 (m, 4H), 7.49 (dd,  $J = 8.0$  Hz,  $J = 7.5$  Hz, 1H), 7.38–7.34 (m, 2H), 7.23–7.14 (m, 3H), 7.07–7.02 (m, 2H), 6.68 (dd,  $J = 6.5$  Hz,  $J = 3.0$  Hz, 1H), 6.60 (d,  $J = 3.0$  Hz, 1H), 3.84 (s, 3H). Mass Spectrometry: HRMS-FIA (m/z): Calcd for  $[\text{C}_{31}\text{H}_{22}\text{N}_4\text{O}_5\text{PdS} + \text{H}]$ , 669.04240. Found, 669.04260.<sup>11</sup>

### Synthesis of monofluoro Pd(IV) complexes with different pyridine substitution

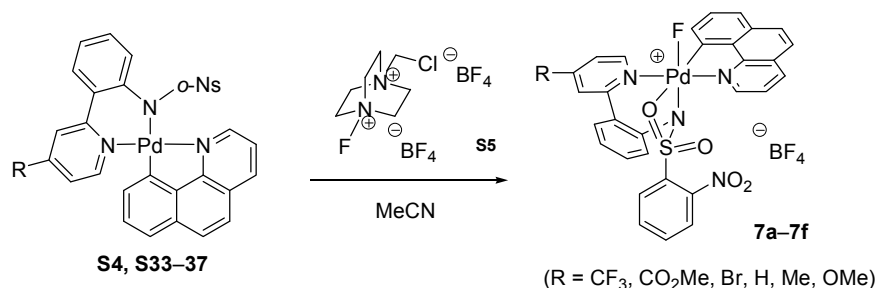

To benzo[*h*]quinolinyl palladium(II) pyridine-sulfonamido complex **S4**, **S33–S37** (0.020 mmol, 1.0 equiv) in acetonitrile-*d*<sub>3</sub> (0.6 mL) at 23 °C was added 1-chloromethyl-4-fluoro-1,4-diazoniabicyclo [2.2.2]octane bis(tetrafluoroborate) (**S5**) (7.1 mg, 0.020 mmol, 1.0 equiv). After stirring for 10 min at 23 °C, the colorless suspension formed a dark purple solution. Compounds **7a–7f** were characterized by NMR spectroscopy as acetonitrile solution without purification.<sup>12</sup>

<sup>12</sup> Compound **7d** and **1** are identical, but labeled like this for clarity.

**4-Trifluoromethylpyridinyl palladium(IV) complex 7a**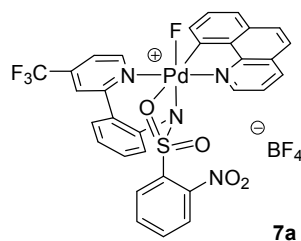

NMR Spectroscopy:  $^1\text{H}$  NMR (600 MHz, acetonitrile- $d_3$ , 25 °C,  $\delta$ ): 9.65 (d,  $J$  = 6.0 Hz, 1H), 9.58 (d,  $J$  = 5.4 Hz, 1H), 8.87 (d,  $J$  = 7.8 Hz, 1H), 8.68 (s, 1H), 8.19 (d,  $J$  = 6.0 Hz, 1H), 8.04–7.98 (m, 3H), 7.82 (dd,  $J$  = 7.8 Hz,  $J$  = 1.2 Hz, 1H), 7.77 (d,  $J$  = 7.8 Hz, 1H), 7.60–7.58 (m, 2H), 7.43–7.38 (m, 2H), 7.19 (dd,  $J$  = 7.8 Hz,  $J$  = 7.8 Hz, 1H), 7.03 (dd,  $J$  = 8.4 Hz,  $J$  = 8.4 Hz, 1H), 6.90 (ddd,  $J$  = 9.0 Hz,  $J$  = 9.0 Hz,  $J$  = 1.2 Hz, 1H), 6.79 (d,  $J$  = 8.4 Hz, 1H), 6.30 (d,  $J$  = 8.4 Hz, 1H).  $^{19}\text{F}$  NMR (375 MHz,  $\text{CDCl}_3$ , 23 °C,  $\delta$ ): –65.9 (s), –152.3 (s), –278.4 (br s).

**4-Methoxycarbonylpyridinyl palladium(IV) complex 7b**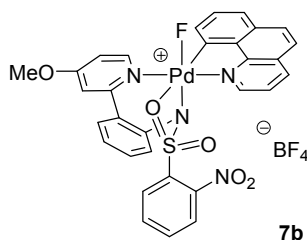

NMR Spectroscopy:  $^1\text{H}$  NMR (600 MHz, acetonitrile- $d_3$ , 25 °C,  $\delta$ ): 9.66–9.64 (m, 2H), 8.94 (d,  $J$  = 8.4 Hz, 1H), 8.86 (d,  $J$  = 1.2 Hz, 1H), 8.38 (dd,  $J$  = 6.6 Hz,  $J$  = 1.8 Hz, 1H), 8.12–8.06 (m, 3H), 7.86 (d,  $J$  = 8.4 Hz, 1H), 7.83 (d,  $J$  = 7.8 Hz, 1H), 7.66–7.64 (m, 2H), 7.49–7.45 (m, 2H), 7.25 (dd,  $J$  = 7.8 Hz,  $J$  = 7.8 Hz, 1H), 7.10 (dd,  $J$  = 7.8 Hz,  $J$  = 7.8 Hz, 1H), 6.95 (dd,  $J$  = 7.8 Hz,  $J$  = 7.8 Hz, 1H), 6.83 (d,  $J$  = 8.4 Hz, 1H), 6.35 (d,  $J$  = 8.4 Hz, 1H), 4.18 (s, 3H).  $^{19}\text{F}$  NMR (375 MHz,  $\text{CDCl}_3$ , 23 °C,  $\delta$ ): –152.3 (s), –278.6 (br s).

**4-Bromopyridinyl palladium(II) complex 7c**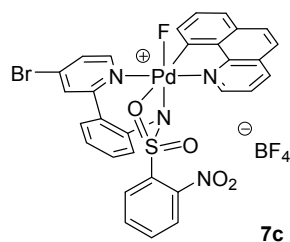

NMR Spectroscopy: <sup>1</sup>H NMR (600 MHz, acetonitrile-*d*<sub>3</sub>, 25 °C, δ): 9.63 (d, *J* = 5.4 Hz, 1H), 9.33 (d, *J* = 7.2 Hz, 1H), 8.93 (d, *J* = 7.8 Hz, 1H), 8.67 (s, 1H), 8.18–8.17 (m, 2H), 8.11–8.05 (m, 2H), 7.84–7.80 (m, 2H), 7.69–7.63 (m, 2H), 7.52–7.46 (m, 2H), 7.23 (dd, *J* = 7.8 Hz, *J* = 7.8 Hz, 1H), 7.10 (dd, *J* = 7.8 Hz, *J* = 7.8 Hz, 1H), 6.94 (dd, *J* = 7.8 Hz, *J* = 7.8 Hz, 1H), 6.82 (d, *J* = 9.0 Hz, 1H), 6.37 (d, *J* = 9.0 Hz, *J* = 9.0 Hz, 1H). <sup>19</sup>F NMR (375 MHz, CDCl<sub>3</sub>, 23 °C, δ): -152.3 (s), -279.8 (br s).

**4-Methylpyridinyl palladium(II) complex 7e**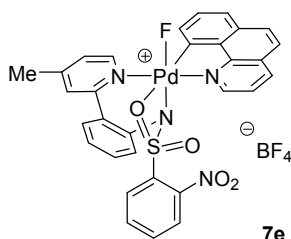

NMR Spectroscopy: <sup>1</sup>H NMR (600 MHz, acetonitrile-*d*<sub>3</sub>, 25 °C, δ): 9.61 (d, *J* = 5.4 Hz, 1H), 9.29 (d, *J* = 6.6 Hz, 1H), 8.92 (d, *J* = 7.8 Hz, 1H), 8.25 (s, 1H), 8.11–8.04 (m, 3H), 7.83 (dd, *J* = 6.0 Hz, *J* = 6.0 Hz, 1H), 7.78 (d, *J* = 6.0 Hz, 1H), 7.66 (d, *J* = 7.8 Hz, *J* = 7.8 Hz, 1H), 7.58 (d, *J* = 7.8 Hz, 1H), 7.51 (d, *J* = 8.4 Hz, 1H), 7.46 (dd, *J* = 7.8 Hz, *J* = 7.8 Hz, 1H), 7.25 (dd, *J* = 7.2 Hz, *J* = 7.2 Hz, 1H), 7.10 (dd, *J* = 7.8 Hz, *J* = 7.8 Hz, 1H), 6.93 (dd, *J* = 7.8 Hz, *J* = 7.8 Hz, 1H), 6.79 (d, *J* = 8.4 Hz, 1H), 6.32 (d, *J* = 8.4 Hz, 1H), 2.78 (s, 3H). <sup>19</sup>F NMR (375 MHz, CDCl<sub>3</sub>, 23 °C, δ): -152.1 (s), -278.5 (br s).



**4-Methoxypyridinyl palladium(II) complex 7f**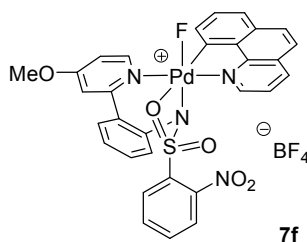

NMR Spectroscopy:  $^1\text{H}$  NMR (500 MHz, acetonitrile- $d_3$ , 25 °C,  $\delta$ ): 9.53 (d,  $J$  = 5.5 Hz, 1H), 9.17 (d,  $J$  = 7.0 Hz, 1H), 8.85 (d,  $J$  = 8.0 Hz, 1H), 8.05–7.98 (m, 3H), 7.80–7.73 (m, 3H), 7.59 (dd,  $J$  = 8.0 Hz,  $J$  = 7.5 Hz, 1H), 7.50 (d,  $J$  = 8.0 Hz, 1H), 7.46 (d,  $J$  = 8.0 Hz, 1H), 7.58 (d,  $J$  = 7.8 Hz,  $J$  = 7.8 Hz, 1H), 7.51 (d,  $J$  = 8.4 Hz, 1H), 7.46 (dd,  $J$  = 7.8 Hz,  $J$  = 7.8 Hz, 1H), 7.43–7.36 (m, 2H), 7.17 (dd,  $J$  = 7.5 Hz,  $J$  = 7.5 Hz, 1H), 7.04 (dd,  $J$  = 8.0 Hz,  $J$  = 8.0 Hz, 1H), 6.87 (dd,  $J$  = 7.5 Hz,  $J$  = 7.0 Hz, 1H), 6.70 (d,  $J$  = 8.0 Hz, 1H), 6.29 (d,  $J$  = 9.0 Hz, 1H), 4.17 (s, 3H).  $^{19}\text{F}$  NMR (375 MHz,  $\text{CDCl}_3$ , 23 °C,  $\delta$ ): -152.1 (s), -280.0 (br s).

**Kinetic experiment of C–F reductive elimination from monofluoro Pd(IV) complexes**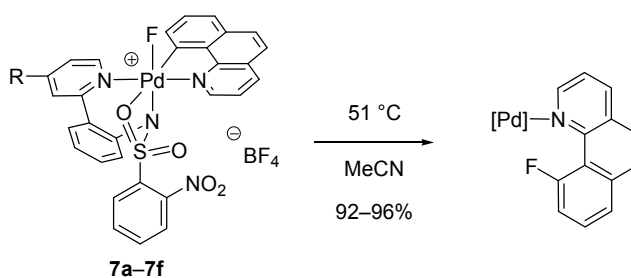

**7a–7f**  
(R =  $\text{CF}_3$ ,  $\text{CO}_2\text{Me}$ , Br, H, Me, OMe)

Solutions (33.3 mM) of compounds **7a–7f** were prepared by reacting compound **S4**, **S33–S37** (0.020 mmol, 1.0 equiv) with 1-chloromethyl-4-fluoro-1,4-diazoniabicyclo [2.2.2]octane bis(tetrafluoroborate) (**S5**) (7.1 mg, 0.020 mmol, 1.0 equiv) in NMR tubes under nitrogen. NMR samples were placed in the preheated NMR machine (51 °C) and the disappearance of the compounds **7a–7f** and the formation of product were monitored by integrating the peak at around 6.3 ppm and 9.1 ppm, respectively, relative to the peak of 1-chloromethyl-1,4-diazoniabicyclo [2.2.2]octane (tetrafluoroborate) at 4.91 ppm.

**R = CF<sub>3</sub>**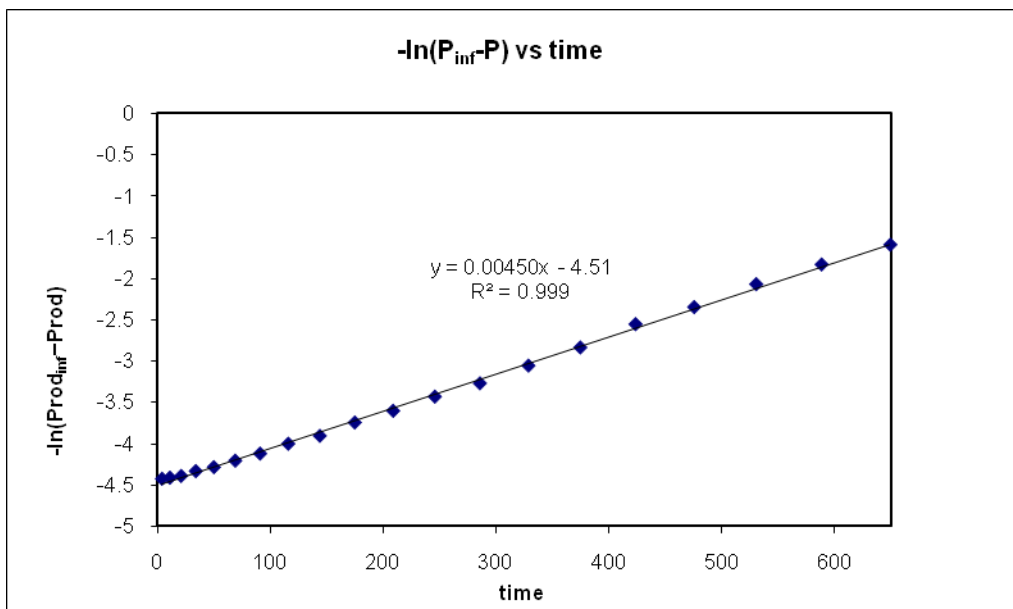**R = CO<sub>2</sub>Me**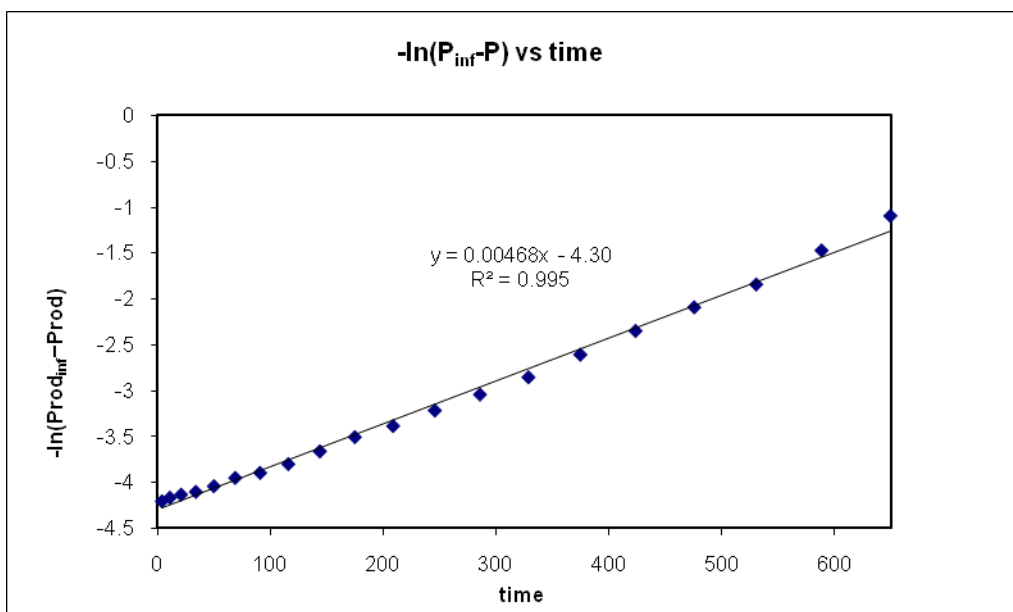

**R = Br**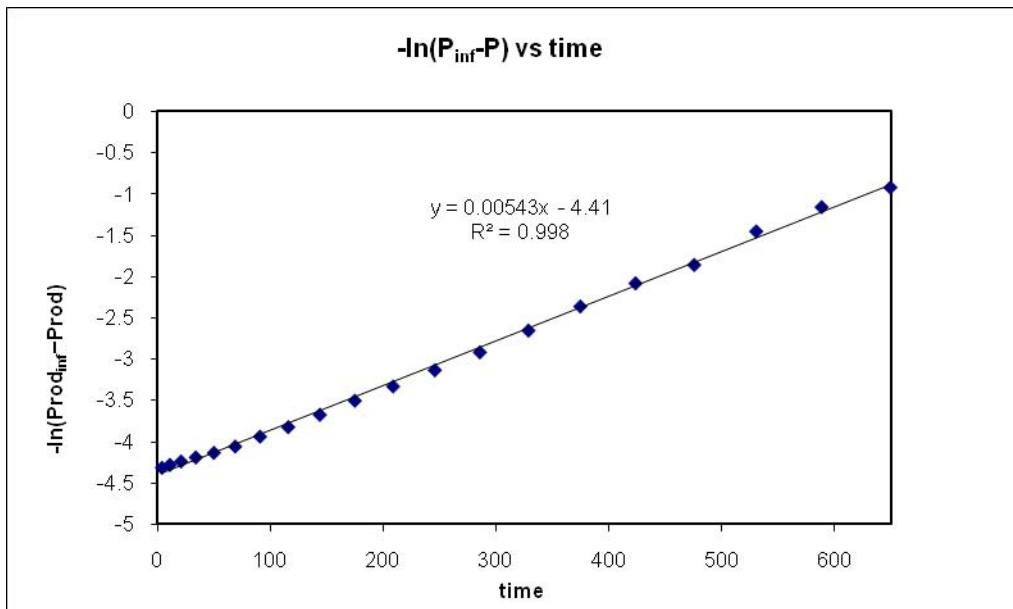**R = H**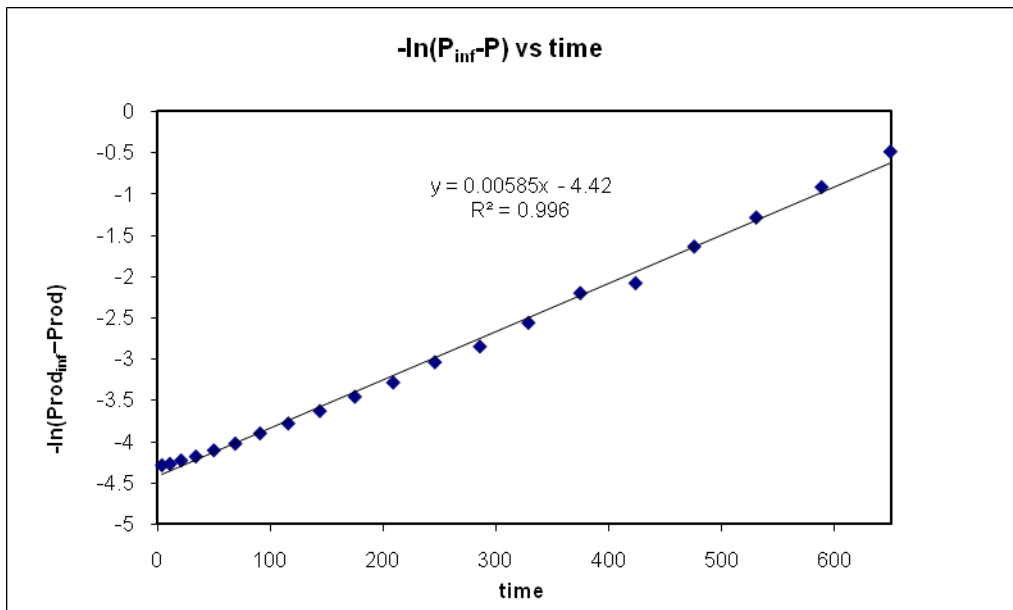

**R = Me**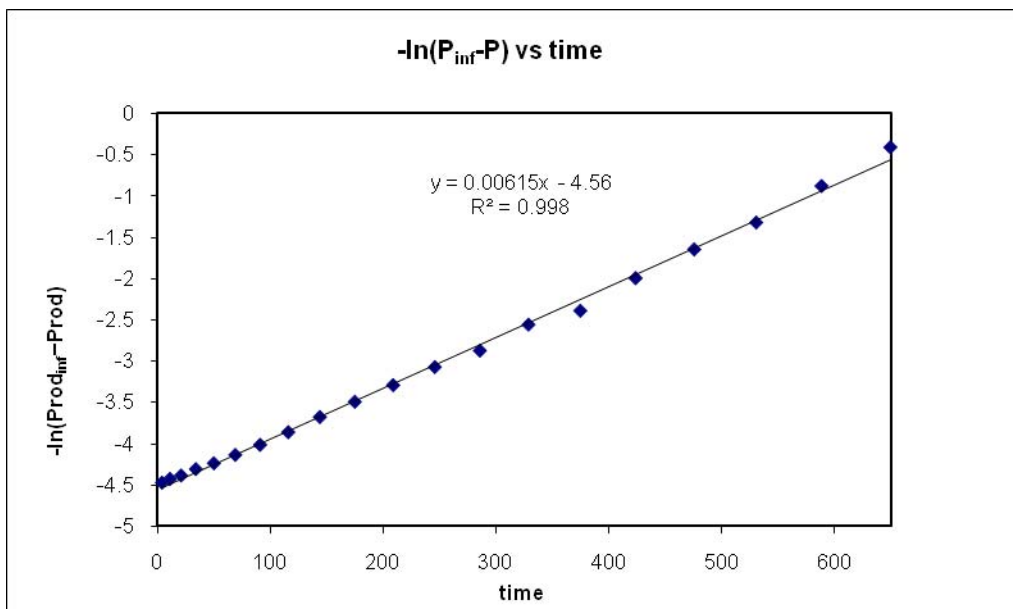**R = OMe**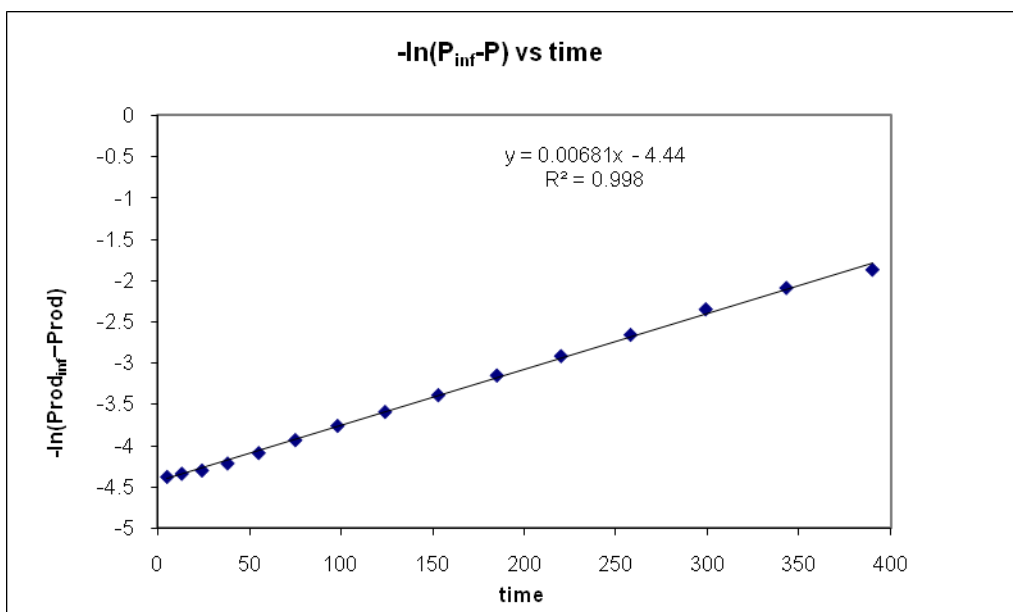

| R                  | $\sigma$ | k       | $\ln(k_X/k_H)$ | Fluorination Yield (%) |
|--------------------|----------|---------|----------------|------------------------|
| CF <sub>3</sub>    | 0.53     | 0.00450 | -0.262         | 94                     |
| CO <sub>2</sub> Me | 0.39     | 0.00468 | -0.223         | 96                     |
| Br                 | 0.23     | 0.00543 | -0.0747        | 95                     |
| H                  | 0        | 0.00585 | 0.0000         | 95                     |
| Me                 | -0.17    | 0.00615 | 0.0510         | 92                     |
| OMe                | -0.27    | 0.00681 | 0.152          | 93                     |

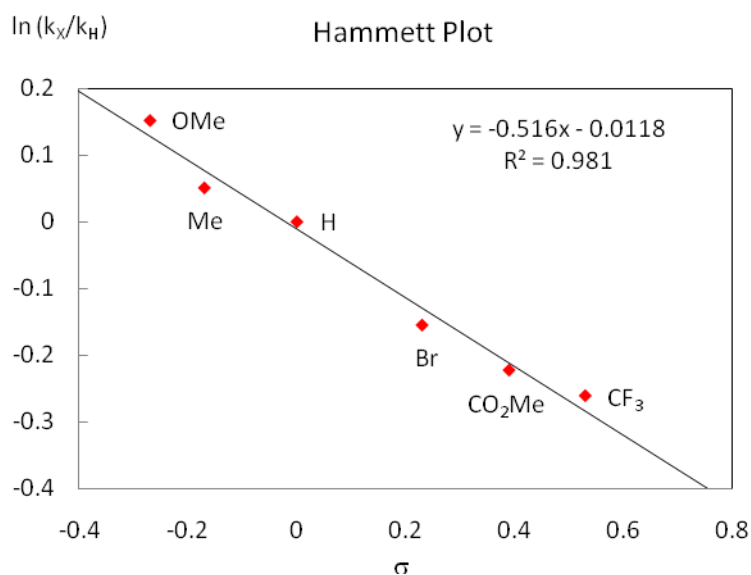

## Hammett plot for benzo[*h*]quinoline substitution

### Synthesis of substituted benzo[*h*]quinolines

#### 7-Nitrobenzo[*h*]quinoline (S38)

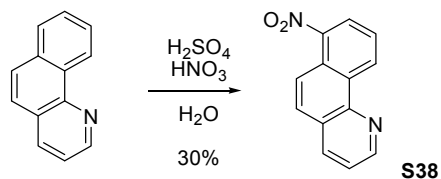

Under air, benzo[*h*]quinoline (5.00 g, 27.9 mmol, 1.00 equiv) was dissolved in conc. H<sub>2</sub>SO<sub>4</sub> (10 mL) at 23 °C. The reaction mixture was cooled to 0 °C and the mixture of conc. H<sub>2</sub>SO<sub>4</sub> (3.3 mL) and HNO<sub>3</sub> (5.3 mL) (prepared with cooling) was added dropwise over 20 min. The reaction mixture was stirred at 0 °C

for 15 min and was subsequently poured onto water (300 mL). The precipitate was filtered, dried and purified by chromatography on silica gel eluting with CH<sub>2</sub>Cl<sub>2</sub>/hexanes 1:1 (v/v) to afford 1.88 g of the title compound as a pale yellow solid (30% yield).

$R_f = 0.78$  (CH<sub>2</sub>Cl<sub>2</sub>). NMR Spectroscopy: <sup>1</sup>H NMR (500 MHz, CDCl<sub>3</sub>, 25 °C,  $\delta$ ): 9.65 (d,  $J = 8.0$  Hz, 1H), 9.03 (dd,  $J = 4.5$  Hz,  $J = 2.0$  Hz, 1H), 8.43 (d,  $J = 9.5$  Hz, 1H), 8.32 (dd,  $J = 7.5$  Hz,  $J = 1.0$  Hz, 1H), 8.21 (dd,  $J = 8.0$  Hz,  $J = 1.5$  Hz, 1H), 7.88 (d,  $J = 9.0$  Hz, 1H), 7.77 (dd,  $J = 8.0$  Hz,  $J = 8.0$  Hz, 1H), 7.61 (dd,  $J = 8.0$  Hz,  $J = 4.5$  Hz, 1H). <sup>13</sup>C NMR (125 MHz, CDCl<sub>3</sub>, 25 °C,  $\delta$ ): 149.9, 146.9, 145.3, 135.9, 132.9, 130.4, 129.0, 125.9, 125.6, 125.6, 125.1, 123.0, 121.3. Mass Spectrometry: HRMS-FIA ( $m/z$ ): Calcd for [C<sub>13</sub>H<sub>8</sub>N<sub>2</sub>O<sub>2</sub> + H], 225.06585. Found, 225.06650.<sup>13</sup>

### 7-Aminobenzo[*h*]quinoline (S39)

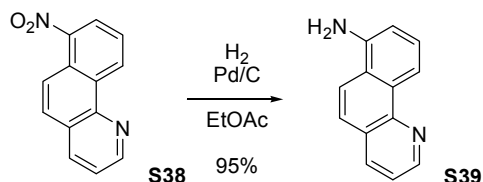

To 7-nitrobenzo[*h*]quinoline (S38) (1.00 g, 4.46 mmol, 1.00 equiv) in EtOAc (45 mL) at 23 °C was added 10% Pd/C (446 mg). H<sub>2</sub> gas (1 atm) was introduced using a balloon and the reaction mixture was stirred for 1.0 hr at 23 °C. The reaction mixture was filtered through a pad of celite and the filtrate was concentrated to afford 820 mg of the title compound as a brown solid (95% yield).

$R_f = 0.30$  (CH<sub>2</sub>Cl<sub>2</sub>). NMR Spectroscopy: <sup>1</sup>H NMR (500 MHz, CDCl<sub>3</sub>, 23 °C,  $\delta$ ): 8.99 (dd,  $J = 4.0$  Hz,  $J = 1.5$  Hz, 1H), 8.79 (d,  $J = 8.5$  Hz, 1H), 8.13 (dd,  $J = 8.0$  Hz,  $J = 1.5$  Hz, 1H), 7.82 (d,  $J = 9.0$  Hz, 1H), 7.62 (d,  $J = 9.5$  Hz, 1H), 7.54 (dd,  $J = 7.5$  Hz,  $J = 7.5$  Hz, 1H), 7.49 (dd,  $J = 8.0$  Hz,  $J = 4.5$  Hz, 1H), 7.02 (dd,  $J = 7.5$  Hz,  $J = 1.0$  Hz, 1H), 4.19 (br s, 2H). <sup>13</sup>C NMR (125 MHz, CDCl<sub>3</sub>, 25 °C,  $\delta$ ): 146.8, 146.7, 142.4, 135.7, 132.5, 127.5, 126.1, 124.0, 122.4, 121.7, 120.5, 115.3, 113.5. Mass Spectrometry: HRMS-FIA ( $m/z$ ): Calcd for [C<sub>13</sub>H<sub>10</sub>N<sub>2</sub> + H], 195.09222. Found, 195.09235.

### 7-Chlorobenzo[*h*]quinoline (S40)

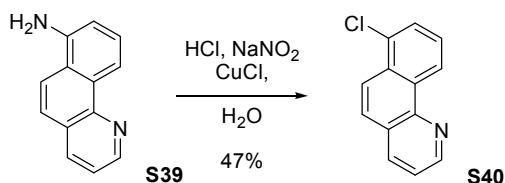

<sup>13</sup> Barltrop, J. A.; MacPhee, K. E. *J. Chem. Soc.* **1952**, 638–642.

Under air, 7-aminobenzo[*h*]quinoline (**S39**) (39.0 mg, 0.200 mmol, 1.00 equiv) was dissolved in 2N HCl (1.2 mL) at 0 °C. To the reaction mixture was added a solution of NaNO<sub>2</sub> (16.6 mg, 0.240 mmol, 1.20 equiv) in H<sub>2</sub>O (0.5 mL) dropwise over 2 min. The reaction mixture was stirred for 30 min at 0 °C and a solution of CuCl (19.8 mg, 0.200 mmol, 1.00 equiv) in conc. HCl (0.5 mL) was added dropwise over 2 min. The reaction mixture was warmed to 23 °C and further stirred for 1.0 hr before aqueous NaHCO<sub>3</sub> (3.0 mL) was added. To the reaction mixture was added CH<sub>2</sub>Cl<sub>2</sub> (2.0 mL) and the phases were separated. The aqueous layer was extracted with CH<sub>2</sub>Cl<sub>2</sub> (3 × 2 mL). The combined organic phases were washed with brine (5 mL) and dried (Na<sub>2</sub>SO<sub>4</sub>). The filtrate was concentrated in vacuo and the residue was purified by preparative TLC eluting with hexanes/CH<sub>2</sub>Cl<sub>2</sub> 1:2 (v/v) to afford 20 mg of the title compound as a pale-yellow solid (47% yield).

$R_f$  = 0.79 (CH<sub>2</sub>Cl<sub>2</sub>). NMR Spectroscopy: <sup>1</sup>H NMR (500 MHz, CDCl<sub>3</sub>, 25 °C,  $\delta$ ): 9.26 (d,  $J$  = 8.5 Hz, 1H), 9.02 (dd,  $J$  = 4.5 Hz,  $J$  = 2.0 Hz, 1H), 8.27 (d,  $J$  = 9.5 Hz, 1H), 8.19 (dd,  $J$  = 8.0 Hz,  $J$  = 2.0 Hz, 1H), 7.79–7.76 (m, 2H), 7.64 (dd,  $J$  = 8.5 Hz,  $J$  = 8.5 Hz, 1H), 7.55 (dd,  $J$  = 8.0 Hz,  $J$  = 4.5 Hz, 1H). <sup>13</sup>C NMR (125 MHz, CDCl<sub>3</sub>, 25 °C,  $\delta$ ): 149.3, 146.1, 135.9, 133.1, 131.9, 130.8, 128.6, 127.0, 126.5, 126.2, 123.4, 123.4, 122.3. Mass Spectrometry: HRMS-FIA ( $m/z$ ): Calcd for [C<sub>13</sub>H<sub>8</sub>ClN + H], 214.04235. Found, 214.04200.

### 7-Cyanobenzo[*h*]quinoline (**S41**)

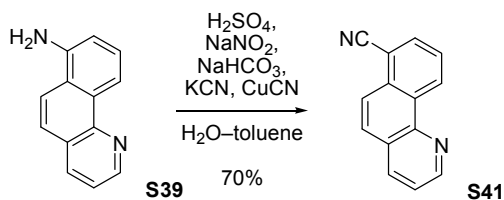

Under air, to 7-aminobenzo[*h*]quinoline (**S39**) (194 mg, 1.00 mmol, 1.00 equiv) in H<sub>2</sub>O (4.0 mL), sulfuric acid (106  $\mu$ L, 2.00 mmol, 2.00 equiv) was added dropwise at 0 °C. After stirring for 10 min, a solution of NaNO<sub>2</sub> (83.0 mg, 1.20 mmol, 1.20 equiv) in H<sub>2</sub>O (2.0 mL) was added dropwise and the reaction mixture was stirred for 30 min at 0 °C. NaHCO<sub>3</sub> (336 mg, 4.00 mmol, 4.00 equiv), H<sub>2</sub>O (5.0 mL), and toluene (5.0 mL) were added and the reaction mixture was warmed to 23 °C over 15 min. A solution of KCN (446 mg, 6.85 mmol, 6.85 equiv) and CuCN (224 mg, 2.50 mmol, 2.50 equiv) in H<sub>2</sub>O (2.0 mL) was added dropwise. The reaction mixture was warmed to 70 °C, stirred for 2.0 hr, and cooled to 23 °C. The cooled mixture was extracted with EtOAc (3 x 15 mL). The combined organic phases were washed with brine, dried (MgSO<sub>4</sub>), and concentrated in vacuo. The crude product was purified by chromatography on silica gel eluting with EtOAc/hexanes 1:9 (v/v) to afford 143 mg of the title compound as a brown solid (70% yield).

$R_f$  = 0.15 (hexanes/EtOAc 14 :1 (v/v)). NMR Spectroscopy: <sup>1</sup>H NMR (500 MHz, CDCl<sub>3</sub>, 23 °C,  $\delta$ ): 9.55 (d,  $J$  = 8.5 Hz, 1H), 9.05 (d,  $J$  = 4.5 Hz, 1H), 8.24 (d,  $J$  = 8.0 Hz, 1H), 8.20 (d,  $J$  = 9.0 Hz, 1H), 8.07 (d,  $J$  = 7.5 Hz, 1H), 7.90 (d,  $J$  = 9.0 Hz, 1H), 7.77 (ddd,  $J$  = 8.0 Hz,  $J$  = 8.0 Hz,  $J$  = 1.0 Hz, 1H), 7.61 (ddd,  $J$  =

8.0 Hz,  $J = 4.0$  Hz,  $J = 2.0$  Hz, 1H).  $^{13}\text{C}$  NMR (125 MHz,  $\text{CDCl}_3$ , 25 °C,  $\delta$ ): 149.8, 145.7, 136.1, 133.8, 133.4, 131.7, 129.6, 128.5, 126.4, 126.3, 123.9, 122.8, 117.9, 110.1. Mass Spectrometry: HRMS-FIA ( $m/z$ ): Calcd for  $[\text{C}_{14}\text{H}_8\text{N}_2 + \text{H}]$ , 205.07657. Found, 205.07669.

### 7-Formylbenzo[*h*]quinoline (S42)

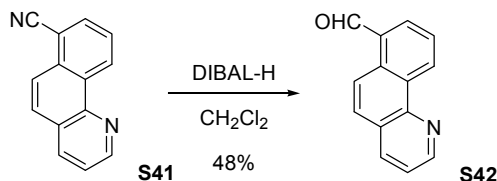

To 7-cyanobenzo[*h*]quinoline (**S41**) (84.6 mg, 0.414 mmol, 1.00 equiv) in  $\text{CH}_2\text{Cl}_2$  (5.0 mL) at  $-78$  °C, diisobutylaluminum hydride (1.0 M in hexanes, 0.83 mL, 0.83 mmol, 2.0 equiv) was added dropwise and the reaction mixture was stirred for 1.5 hr. An additional equivalent of diisobutylaluminum hydride (1.0 M in hexanes, 0.42 mL, 0.42 mmol, 2.0 equiv) was added dropwise. The reaction mixture was stirred for 30 min and warmed to 23 °C. The reaction was quenched with 1N HCl (5.0 mL), and extracted with  $\text{CH}_2\text{Cl}_2$  ( $3 \times 10$  mL). The combined organic phases were washed with  $\text{NaHCO}_3$  (aq) and brine, dried ( $\text{MgSO}_4$ ), and concentrated in vacuo. The crude mixture was filtered through a plug of silica gel eluting with  $\text{CH}_2\text{Cl}_2$  and concentrated in vacuo to afford 41.3 mg of the title compound as a tan solid (48 % yield).  $R_f = 0.33$  (hexanes/EtOAc 5:1 (v/v)). NMR Spectroscopy:  $^1\text{H}$  NMR (500 MHz,  $\text{CDCl}_3$ , 25 °C,  $\delta$ ): 10.51 (s, 1H), 9.68 (d,  $J = 8.5$  Hz, 1H), 9.26 (d,  $J = 9.5$  Hz, 1H), 9.05 (dd,  $J = 4.5$  Hz,  $J = 1.5$  Hz, 1H), 8.25 (dd,  $J = 8.0$  Hz, 2.0 Hz, 1H), 8.19 (dd,  $J = 7.0$  Hz,  $J = 1.0$  Hz, 1H), 7.93–7.89 (m, 2H), 7.60 (dd,  $J = 8.0$  Hz,  $J = 4.5$  Hz, 1H).  $^{13}\text{C}$  NMR (125 MHz,  $\text{CDCl}_3$ , 25 °C,  $\delta$ ): 193.6, 149.4, 145.8, 137.2, 135.8, 132.2, 131.7, 131.2, 131.1, 128.7, 126.3, 126.2, 123.5, 122.5. Mass Spectrometry: HRMS-FIA ( $m/z$ ): Calcd for  $[\text{C}_{14}\text{H}_9\text{NO} + \text{H}]$ , 208.07624. Found, 208.07655.

### 7-Hydroxybenzo[*h*]quinoline (S43)

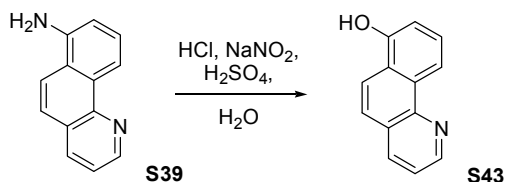

Under air, to 7-aminobenzo[*h*]quinoline (**S39**) (400 mg, 2.06 mmol, 1.00 equiv) in 2N HCl (3.8 mL) and water (5.8 mL) at 0 °C was added sodium nitrite (156 mg, 2.27 mmol, 1.10 equiv) in  $\text{H}_2\text{O}$  (1.4 mL). The reaction mixture was stirred at 0 °C for 1.0 hr. The reaction mixture was added dropwise to a stirring solution of sulfuric acid (3.3 mL) in  $\text{H}_2\text{O}$  (7.9 mL) at 88 °C, and subsequently heated to 100 °C for 1.0 hr. The reaction was cooled to 23 °C and neutralized to pH 7 with 3N NaOH (aq), and extracted with EtOAc



(3 × 150 mL). The combined organic extracts were dried (Na<sub>2</sub>SO<sub>4</sub>) and concentrated in vacuo to afford a crude solid (370 mg), which was used in the next step without further purification.<sup>14</sup>

### 7-Methoxybenzo[*h*]quinoline (S44)

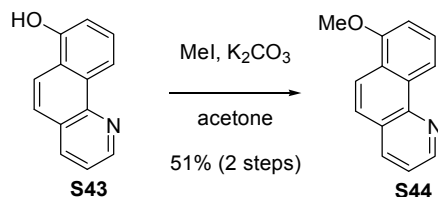

Under air, to crude 7-hydroxybenzo[*h*]quinoline (S43) (370 mg, 1.90 mmol, 1.00 equiv) in acetone (50 mL) were added potassium carbonate (524 mg, 3.79 mmol, 2.00 equiv) and iodomethane (0.180 mL, 2.84 mmol, 1.50 equiv). The mixture was heated at reflux and stirred for 11 hr. The reaction mixture was cooled to 23 °C and concentrated in vacuo. The concentrate was diluted with EtOAc (15 mL), washed with H<sub>2</sub>O (10 mL) and brine (10 mL), and the aqueous phase was extracted with EtOAc (2 × 15 mL). The combined organic phases were dried (Na<sub>2</sub>SO<sub>4</sub>) and concentrated in vacuo. The residue was purified by chromatography on silica gel eluting with hexanes/EtOAc 9:1 (v/v) to afford 218 mg of the title compound as a light yellow solid (51% yield, 2 steps).

R<sub>f</sub> = 0.34 (hexanes/EtOAc 9:1 (v/v)). NMR Spectroscopy: <sup>1</sup>H NMR (500 MHz, CDCl<sub>3</sub>, 25 °C, δ): 9.00 (dd, *J* = 4.5 Hz, *J* = 1.5 Hz, 1H), 8.89 (d, *J* = 8.0 Hz, 1H), 8.30 (d, *J* = 9.0 Hz, 1H), 8.18 (dd, *J* = 8.0 Hz, *J* = 1.5 Hz, 1H), 7.69–7.65 (m, 2H), 7.52 (dd, *J* = 8.0 Hz, *J* = 4.5 Hz, 1H), 7.11 (d, *J* = 8.0 Hz, 1H), 4.05 (s, 3H). <sup>13</sup>C NMR (125 MHz, CDCl<sub>3</sub>, 25 °C, δ): 155.6, 148.9, 146.4, 136.0, 132.8, 127.4, 126.7, 125.0, 124.5, 122.0, 121.6, 116.6, 107.5, 55.9. Mass Spectrometry: HRMS-FIA (m/z): Calcd for [C<sub>14</sub>H<sub>11</sub>NO + H], 210.09189. Found, 210.09207.

### 7-Iodobenzo[*h*]quinoline (S45)

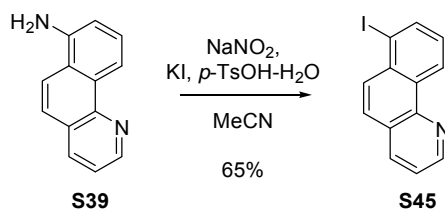

To a solution of *p*-toluenesulfonic acid monohydrate (588 mg, 3.09 mmol, 3.00 equiv) in acetonitrile (4.0 mL) under air was added 7-aminobenzo[*h*]quinoline (S39) (200 mg, 1.03 mmol, 1.00 equiv). The reaction mixture was cooled to 10 °C and a solution of NaNO<sub>2</sub> (142 mg, 2.06 mmol, 2.00 equiv) and KI

<sup>14</sup> Aramoto, H.; Obora, Y.; Ishii, Y. *J. Org. Chem.* **2009**, *74*, 628–633.

(427 mg, 2.57 mmol, 2.50 equiv) in H<sub>2</sub>O (0.6 mL) was added dropwise, and the reaction was stirred for 10 min, warmed to 23 °C, and stirred for an additional 1.5 hr. H<sub>2</sub>O (15 mL), Na<sub>2</sub>S<sub>2</sub>O<sub>3</sub> (2 mL) and sat NaHCO<sub>3</sub> (aq) were added to basify the solution. The reaction mixture was extracted with EtOAc (10 mL) and CH<sub>2</sub>Cl<sub>2</sub> (2 × 10 mL). The combined organic phases were dried (Na<sub>2</sub>SO<sub>4</sub>) and concentrated in vacuo. The residue was purified by chromatography on silica gel eluting with CH<sub>2</sub>Cl<sub>2</sub>/ hexanes 2:1 (v/v) to afford 204 mg of the title compound as a light yellow crystalline solid (65% yield).

R<sub>f</sub> = 0.52 (CH<sub>2</sub>Cl<sub>2</sub>/hexanes 2:1 (v/v)). NMR Spectroscopy: <sup>1</sup>H NMR (500 MHz, CDCl<sub>3</sub>, 25 °C, δ): 9.37 (dd, *J* = 9.5 Hz, *J* = 1.0 Hz, 1H), 9.03 (dd, *J* = 4.5 Hz, *J* = 1.5 Hz, 1H), 8.28 (dd, *J* = 7.5 Hz, *J* = 1.5 Hz, 1H), 8.22 (dd, *J* = 8.0 Hz, *J* = 1.5 Hz, 1H), 8.13 (d, *J* = 9.5 Hz, 1H), 7.79 (d, *J* = 9.5 Hz, 1H), 7.57 (dd, *J* = 8.5 Hz, *J* = 4.5 Hz, 1H), 7.44 (dd, *J* = 7.5 Hz, *J* = 7.5 Hz, 1H). <sup>13</sup>C NMR (125 MHz, CDCl<sub>3</sub>, 25 °C, δ): 149.5, 146.2, 139.7, 136.0, 134.7, 132.9, 131.5, 128.2, 127.2, 126.2, 125.3, 122.5, 99.4. Mass Spectrometry: HRMS-FIA (m/z): Calcd for [C<sub>13</sub>H<sub>8</sub>IN + H], 305.97797. Found, 305.97765.

### 7-Methylbenzo[*h*]quinoline (S46)

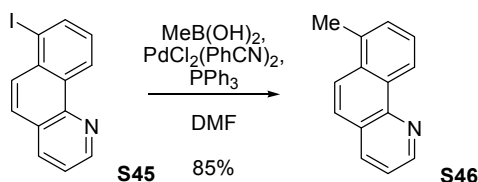

Under air, to 7-iodobenzo[*h*]quinoline (S45) (289 mg, 0.950 mmol, 1.00 equiv), methylboronic acid (623 mg, 2.84 mmol, 3.00 equiv), PdCl<sub>2</sub>(PhCN)<sub>2</sub> (36.0 mg, 0.095 mmol, 10.0 mol%), PPh<sub>3</sub> (50.0 mg, 0.190 mmol, 20.0 mol%), and potassium carbonate (393 mg, 2.84 mmol, 3.00 equiv), was added DMF (7.2 mL). The reaction mixture was heated to 110 °C for 5.5 hr. After cooling to 23 °C, the reaction mixture was diluted with H<sub>2</sub>O and extracted with CH<sub>2</sub>Cl<sub>2</sub> (3 × 10 mL). The combined organic extracts were dried with Na<sub>2</sub>SO<sub>4</sub> and concentrated in vacuo. The crude product was purified by chromatography on silica gel eluting with CH<sub>2</sub>Cl<sub>2</sub> to afford 155 mg of the title compound as a light yellow solid (85% yield).

R<sub>f</sub> = 0.57 (CH<sub>2</sub>Cl<sub>2</sub>). NMR Spectroscopy: <sup>1</sup>H NMR (500 MHz, CDCl<sub>3</sub>, 25 °C, δ): 9.22 (d, *J* = 8.0 Hz, 1H), 9.01 (dd, *J* = 4.5 Hz, *J* = 2.0 Hz, 1H), 8.18 (dd, *J* = 8.0 Hz, 1.5 Hz, 1H), 8.03 (d, *J* = 9.5 Hz, 1H), 7.73 (d, *J* = 9.5 Hz, 1H), 7.64 (dd, *J* = 8.0 Hz, *J* = 7.0 Hz, 1H), 7.56–7.51 (m, 2H), 2.78 (s, 3H). <sup>13</sup>C NMR (125 MHz, CDCl<sub>3</sub>, 25 °C, δ): 149.0, 147.0, 135.9, 134.4, 132.6, 131.8, 129.5, 126.8, 126.1, 125.2, 124.0, 122.7, 121.8, 19.9. Mass Spectrometry: HRMS-FIA (m/z): Calcd for [C<sub>14</sub>H<sub>11</sub>N + H], 194.09697. Found, 194.09667.

## Synthesis of Pd(II) complexes with different benzo[*h*]quinoline substitution

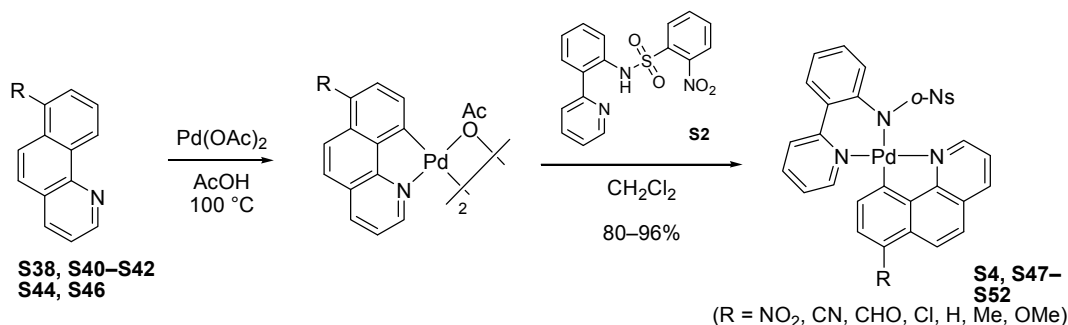

To a substituted benzo[*h*]quinoline **S38**, **S40–S42**, **S44**, **S46** (0.100 mmol, 1.00 equiv) in AcOH (1 mL) at 23 °C was added Pd(OAc)<sub>2</sub> (22.4 mg, 0.100 mmol, 1.00 equiv) and the reaction mixture was heated to 100 °C for 10 min. After being cooled to 23 °C, the reaction mixture was concentrated in vacuo and triturated with Et<sub>2</sub>O (3 × 1 mL) to afford the corresponding cyclopalladation product, which was used in the next step without further purification.

To the crude benzo[*h*]quinoline palladium(II) acetate dimer in CH<sub>2</sub>Cl<sub>2</sub> (1 mL) at 23 °C was added pyridinylsulfonamide ligand **S2** (35.5 mg, 0.100 mmol, 1.00 equiv). After stirring for 1.0 hours the reaction mixture was concentrated in vacuo. The resulting residue was triturated with Et<sub>2</sub>O (3 × 1 mL) to afford the corresponding substituted palladium(II) complex (80–96% yield).

### 7-Nitrobenzo[*h*]quinolinyl palladium(II) complex **S47**

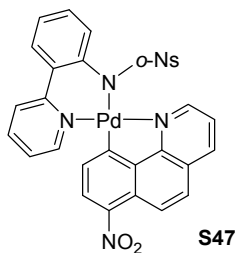

92% yield. NMR Spectroscopy: <sup>1</sup>H NMR (500 MHz, CDCl<sub>3</sub>, 23 °C, δ): 9.66 (d, *J* = 5.0 Hz, 1H), 8.74 (d, *J* = 5.5 Hz, 1H), 8.50 (d, *J* = 9.5 Hz, 1H), 8.29 (d, *J* = 7.5 Hz, 1H), 8.07 (d, *J* = 8.0 Hz, 1H), 7.86 (d, *J* = 8.0 Hz, 1H), 7.71–7.65 (m, 2H), 7.53 (dd, *J* = 8.0 Hz, *J* = 8.0 Hz, 1H), 7.34–7.22 (m, 5H), 7.11–7.06 (m, 2H), 6.99–6.94 (m, 2H). <sup>13</sup>C NMR (125 MHz, CDCl<sub>3</sub>, 23 °C, δ)<sup>15</sup>: 167.5, 157.6, 153.9, 153.1, 151.7, 143.2, 142.7, 142.0, 141.9, 138.9, 137.6, 136.2, 131.8, 130.2, 130.0, 129.5, 129.2, 128.0, 127.5, 126.4, 125.6, 125.3, 125.0, 124.9, 124.5, 124.0, 123.7, 122.9. Mass Spectrometry: HRMS-FIA (m/z): Calcd for

<sup>15</sup> Due to the low solubility of the palladium complex, only 28 carbon resonances were observed in the <sup>13</sup>C spectrum.

[C<sub>30</sub>H<sub>19</sub>N<sub>5</sub>O<sub>6</sub>PdS + H], 684.01636. Found, 684.01552.

### 7-Cyanobenzo[*h*]quinolinyl palladium(II) complex S48

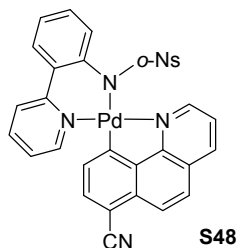

90% yield. NMR Spectroscopy: <sup>1</sup>H NMR (500 MHz, CDCl<sub>3</sub>, 25 °C, δ): 9.55 (d, *J* = 5.5 Hz, 1H), 8.99 (d, *J* = 5.0 Hz, 1H), 8.30 (d, *J* = 7.5 Hz, 1H), 7.75–7.72 (m, 2H), 7.63–7.55 (m, 4H), 7.49 (dd, *J* = 7.0 Hz, *J* = 7.0 Hz, *J* = 1.0 Hz, 1H), 7.41 (d, *J* = 7.5 Hz, 1H), 7.36 (dd, *J* = 7.0 Hz, *J* = 7.0 Hz, 1H), 7.24–7.14 (m, 5H), 7.04 (d, *J* = 8.0 Hz, 1H), 7.00 (d, *J* = 7.5 Hz, 1H). Mass Spectrometry: HRMS-FIA (m/z): Calcd for [C<sub>31</sub>H<sub>19</sub>N<sub>5</sub>O<sub>4</sub>PdS + H], 664.02653. Found, 664.02440.<sup>10</sup>

### 7-Formylbenzo[*h*]quinolinyl palladium(II) complex S49

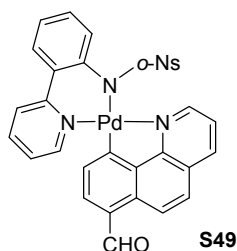

88% yield. NMR Spectroscopy: <sup>1</sup>H NMR (500 MHz, CDCl<sub>3</sub>, 25 °C, δ): 10.30 (s, 1H), 9.63 (d, *J* = 5.5 Hz, 1H), 9.14 (d, *J* = 9.0 Hz, 1H), 8.96 (d, *J* = 6.0 Hz, 1H), 8.39 (d, *J* = 8.0 Hz, 1H), 7.84 (d, *J* = 9.0 Hz, 1H), 7.78–7.76 (m, 2H), 7.71 (dd, *J* = 8.0 Hz, *J* = 5.5 Hz, 1H), 7.66 (dd, *J* = 8.0 Hz, *J* = 8.0 Hz, 1H), 7.52–7.44 (m, 3H), 7.28–7.21 (M, 5H), 7.15 (d, *J* = 7.0 Hz, 1H), 7.06 (d, *J* = 8.5 Hz, 1H). Mass Spectrometry: HRMS-FIA (m/z): Calcd for [C<sub>31</sub>H<sub>20</sub>N<sub>4</sub>O<sub>5</sub>PdS + H], 667.02620. Found, 667.02289.<sup>10</sup>

**7-Chlorobenzo[*h*]quinolinyll palladium(II) complex S50**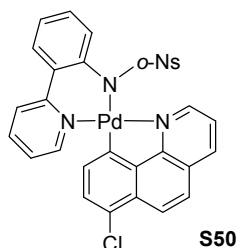

96% yield. NMR Spectroscopy:  $^1\text{H}$  NMR (500 MHz,  $\text{CDCl}_3$ , 23  $^\circ\text{C}$ ,  $\delta$ ): 9.71 (d,  $J = 5.5$ , 1H), 8.82 (d,  $J = 5.5$ , 1H), 8.33 (d,  $J = 8.0$ , 1H), 8.10 (d,  $J = 8.5$ , 1H), 7.83 (d,  $J = 8.5$ , 1H), 7.71–7.68 (m, 2H), 7.64 (ddd,  $J = 8.5$  Hz,  $J = 8.5$  Hz,  $J = 1.5$  Hz, 1H), 7.48 (ddd,  $J = 9.0$  Hz,  $J = 9.0$  Hz, 1.5 Hz, 1H), 7.40 (d,  $J = 8.0$  Hz, 1H), 7.35 (dd,  $J = 7.5$  Hz,  $J = 1.5$  Hz, 1H), 7.31 (d,  $J = 7.0$  Hz, 1H), 7.25–7.23 (m, 2H), 7.18 (dd,  $J = 7.5$  Hz,  $J = 7.5$  Hz, 1H), 7.09–7.02 (m, 2H), 6.96–6.89 (m, 2H).  $^{13}\text{C}$  NMR (125 MHz,  $\text{CDCl}_3$ , 23  $^\circ\text{C}$ ,  $\delta$ )<sup>16</sup>: 157.8, 154.9, 153.7, 153.3, 151.5, 143.7, 138.5, 137.5, 136.2, 131.7, 131.3, 130.4, 130.3, 129.3, 129.1, 127.9, 127.5, 126.8, 126.0, 125.7, 125.0, 124.8, 124.7, 124.2, 123.3, 122.3. Mass Spectrometry: HRMS-FIA (m/z): Calcd for  $[\text{C}_{30}\text{H}_{19}\text{ClN}_4\text{O}_4\text{PdS} + \text{H}]$ , 672.99231. Found, 672.99188.<sup>10</sup>

**7-Methylbenzo[*h*]quinolinyll palladium(II) complex S51**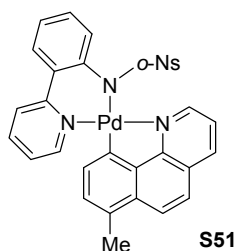

80% yield. NMR Spectroscopy:  $^1\text{H}$  NMR (500 MHz,  $\text{CDCl}_3$ , 25  $^\circ\text{C}$ ,  $\delta$ ): 9.56 (d,  $J = 5.0$  Hz, 1H), 8.97 (d,  $J = 6.0$  Hz, 1H), 8.30 (d,  $J = 8.5$  Hz, 1H), 7.91 (d,  $J = 9.0$  Hz, 1H), 7.73 (d,  $J = 8.0$  Hz, 1H), 7.65–7.56 (m, 4H), 7.49 (dd,  $J = 7.0$  Hz,  $J = 7.0$  Hz, 1H), 7.41 (d,  $J = 7.5$  Hz,  $J = 7.5$  Hz, 1H), 7.26–7.14 (m, 6H), 7.03 (d,  $J = 8.0$  Hz, 1H), 6.88 (d,  $J = 7.5$  Hz, 1H), 2.65 (s, 3H). Anal: calcd for  $\text{C}_{31}\text{H}_{22}\text{N}_4\text{O}_4\text{PdS}$ : C, 57.02; H, 3.40; N, 8.58; found: C, 56.75; H, 3.23; N, 8.41.<sup>10</sup>

<sup>16</sup> Due to the low solubility of the palladium complex, only 26 carbon resonances were observed in the  $^{13}\text{C}$  spectrum.

7-Methoxybenzo[*h*]quinolinyll palladium(II) complex **S52**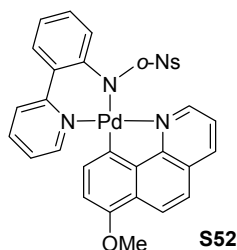

95% yield. NMR Spectroscopy:  $^1\text{H}$  NMR (500 MHz,  $\text{CDCl}_3$ , 25 °C,  $\delta$ ): 9.55 (d,  $J$  = 5.0 Hz, 1H), 8.99 (d,  $J$  = 5.5 Hz, 1H), (d,  $J$  = 8.5 Hz, 1H), 8.13 (d,  $J$  = 9.0 Hz, 1H), 7.30 (d,  $J$  = 8.0 Hz, 1H), 7.64–7.58 (m, 4H), 7.49 (dd,  $J$  = 7.0 Hz,  $J$  = 7.0 Hz, 1H), 7.41 (d,  $J$  = 7.5 Hz, 1H), 7.24–7.13 (m, 5H), 7.03 (d,  $J$  = 8.0 Hz, 1H), 6.88 (d,  $J$  = 8.0 Hz, 1H), 6.82 (d,  $J$  = 8.0 Hz, 1H), 3.96 (s, 3H). Mass Spectrometry: HRMS-FIA ( $m/z$ ): Calcd for  $[\text{C}_{31}\text{H}_{22}\text{N}_4\text{O}_5\text{PdS} + \text{H}]$ , 669.04240. Found, 669.04268.<sup>10</sup>

Synthesis of monofluoro Pd(IV) complexes with different benzo[*h*]quinoline substitution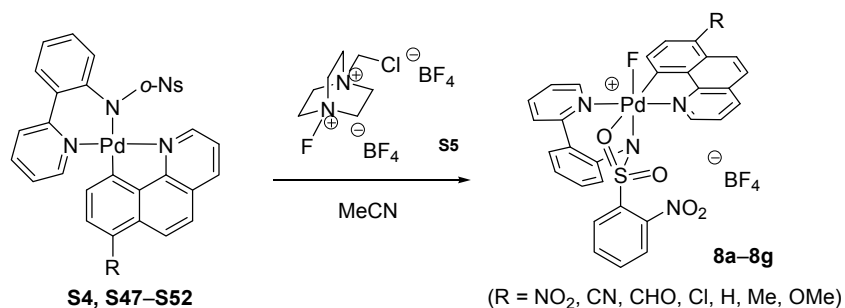

To benzo[*h*]quinolinyll palladium(II) pyridine-sulfonamido complex **S4**, **S47–S52** (0.020 mmol, 1.0 equiv) in acetonitrile-*d*<sub>3</sub> (0.6 mL) at 23 °C was added 1-chloromethyl-4-fluoro-1,4-diazoniabicyclo [2.2.2]octane bis(tetrafluoroborate) (**S5**) (7.1 mg, 0.020 mmol, 1.0 equiv). After stirring for 10 min at 23 °C, the colorless suspension formed a dark purple solution. Compounds **8a–8g** were characterized by NMR spectroscopy in acetonitrile solution without purification.<sup>17</sup>

<sup>17</sup> Compound **8e** and **1** are identical, but labeled like this for clarity.

**7-Nitrobenzo[*h*]quinolinyl palladium(IV) complex 8a**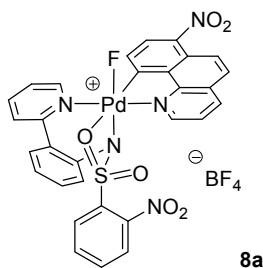

NMR Spectroscopy:  $^1\text{H}$  NMR (500 MHz, acetonitrile- $d_3$ , 25 °C,  $\delta$ ): 9.69 (d,  $J = 5.5$  Hz, 1H), 9.45 (d,  $J = 6.0$  Hz, 1H), 8.97 (d,  $J = 8.0$  Hz, 1H), 8.64 (d,  $J = 9.5$  Hz, 1H), 8.50 (d,  $J = 8.0$  Hz, 1H), 8.43 (d,  $J = 7.5$  Hz, 1H), 8.29 (d,  $J = 9.5$  Hz, 1H), 8.14 (dd,  $J = 8.5$  Hz,  $J = 6.0$  Hz, 1H), 7.96 (d,  $J = 6.5$  Hz, 1H), 7.79–7.74 (m, 2H), 7.61–7.56 (m, 2H), 7.43–7.37 (m, 2H), 7.18 (dd,  $J = 8.0$  Hz,  $J = 8.0$  Hz, 1H), 6.85 (dd,  $J = 7.5$  Hz,  $J = 7.5$  Hz, 1H), 6.71 (d,  $J = 8.5$  Hz, 1H), 6.48 (d,  $J = 9.0$  Hz, 1H).  $^{19}\text{F}$  NMR (375 MHz,  $\text{CDCl}_3$ , 23 °C,  $\delta$ ): –151.8 (s), –277.4 (br s).

**7-Cyanobenzo[*h*]quinolinyl palladium(IV) complex 8b**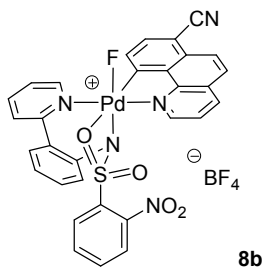

NMR Spectroscopy:  $^1\text{H}$  NMR (500 MHz, acetonitrile- $d_3$ , 25 °C,  $\delta$ ): 9.57 (d,  $J = 5.5$  Hz, 1H), 9.42 (d,  $J = 6.5$  Hz, 1H), 8.85 (d,  $J = 7.5$  Hz, 1H), 8.45 (dd,  $J = 7.5$  Hz, 1H), 8.37 (d,  $J = 7.5$  Hz, 1H), 8.04–7.97 (m, 2H), 7.92 (ddd,  $J = 7.5$  Hz,  $J = 7.5$  Hz,  $J = 1.5$  Hz, 1H), 7.76–7.74 (m, 2H), 7.60–7.54 (m, 2H), 7.43–7.37 (m, 2H), 7.17 (dd,  $J = 8.0$  Hz,  $J = 8.0$  Hz, 1H), 7.02 (dd,  $J = 8.0$  Hz,  $J = 8.0$  Hz, 1H), 6.86 (ddd,  $J = 8.5$  Hz,  $J = 8.5$  Hz,  $J = 1.5$  Hz, 1H), 6.75 (d,  $J = 8.5$  Hz, 1H), 6.27 (d,  $J = 8.5$  Hz, 1H).  $^{19}\text{F}$  NMR (375 MHz,  $\text{CDCl}_3$ , 23 °C,  $\delta$ ): –152.0 (s), –278.5 (br s).

**7-Formylbenzo[*h*]quinolinyl palladium(IV) complex 8c**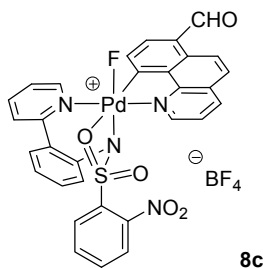

NMR Spectroscopy:  $^1\text{H}$  NMR (500 MHz, acetonitrile- $d_3$ , 25 °C,  $\delta$ ): 10.22 (s, 1H), 9.65 (d,  $J = 5.5$  Hz, 1H), 9.45 (d,  $J = 6.0$  Hz, 1H), 9.07 (d,  $J = 9.5$  Hz, 1H), 8.93 (d,  $J = 7.5$  Hz, 1H), 8.49 (d,  $J = 7.5$  Hz, 1H), 8.42 (d,  $J = 6.5$  Hz, 1H), 8.23 (d,  $J = 9.5$  Hz, 1H), 8.09 (dd,  $J = 8.0$  Hz,  $J = 8.0$  Hz, 1H), 7.96 (ddd,  $J = 8.0$  Hz,  $J = 8.0$  Hz,  $J = 1.5$  Hz, 1H), 7.76 (dd,  $J = 7.5$  Hz,  $J = 0.5$  Hz, 1H), 7.60–7.52 (m, 3H), 7.43–7.37 (m, 2H), 7.17 (dd,  $J = 8.0$  Hz,  $J = 8.0$  Hz, 1H), 6.82 (ddd,  $J = 8.5$  Hz,  $J = 8.5$  Hz,  $J = 1.0$  Hz, 1H), 6.71 (d,  $J = 8.0$  Hz, 1H), 6.51 (d,  $J = 9.0$  Hz, 1H).  $^{19}\text{F}$  NMR (375 MHz,  $\text{CDCl}_3$ , 23 °C,  $\delta$ ): -151.9 (s), -278.2 (br s).

**7-Chlorobenzo[*h*]quinolinyl palladium(IV) complex 8d**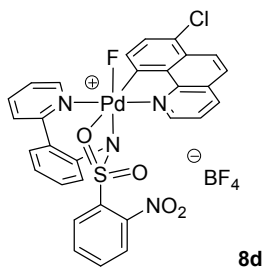

NMR Spectroscopy:  $^1\text{H}$  NMR (500 MHz, acetonitrile- $d_3$ , 25 °C,  $\delta$ ): 9.62 (d,  $J = 5.0$  Hz, 1H), 9.42 (d,  $J = 6.0$  Hz, 1H), 8.91 (d,  $J = 8.0$  Hz, 1H), 8.46 (dd,  $J = 8.0$  Hz,  $J = 8.0$  Hz, 1H), 8.39 (d,  $J = 8.5$  Hz, 1H), 8.21–8.15 (m, 2H), 8.07 (dd,  $J = 8.0$  Hz,  $J = 5.5$  Hz, 1H), 7.93 (dd,  $J = 5.5$  Hz,  $J = 5.5$  Hz, 1H), 7.74 (dd,  $J = 8.0$  Hz,  $J = 1.0$  Hz, 1H), 7.60–7.55 (m, 2H), 7.43–7.37 (m, 2H), 7.19 (dd,  $J = 7.5$  Hz,  $J = 7.5$  Hz, 1H), 7.12 (d,  $J = 8.5$  Hz, 1H), 6.88 (ddd,  $J = 9.0$  Hz,  $J = 9.0$  Hz, 1H), 6.75 (d,  $J = 8.0$  Hz, 1H), 6.26 (d,  $J = 9.0$  Hz, 1H).  $^{19}\text{F}$  NMR (375 MHz,  $\text{CDCl}_3$ , 23 °C,  $\delta$ ): -151.8 (s), -277.9 (br s).



**7-Methylbenzo[*h*]quinolinyll palladium(IV) complex 8f**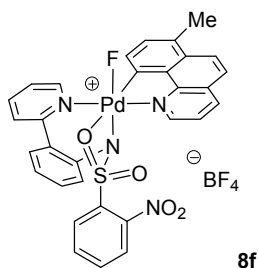

NMR Spectroscopy:  $^1\text{H}$  NMR (500 MHz, acetonitrile- $d_3$ , 25 °C,  $\delta$ ): 9.57 (d,  $J = 6.0$  Hz, 1H), 9.41 (d,  $J = 6.0$  Hz, 1H), 8.84 (d,  $J = 8.0$  Hz, 1H), 8.43 (dd,  $J = 8.0$  Hz,  $J = 8.0$  Hz, 1H), 8.35 (d,  $J = 7.5$  Hz, 1H), 8.08–7.98 (m, 3H), 7.90 (ddd,  $J = 7.5$  Hz,  $J = 7.5$  Hz,  $J = 1.5$  Hz, 1H), 7.75 (d,  $J = 8.0$  Hz, 1H), 7.59–7.54 (m, 2H), 7.43–7.36 (m, 2H), 7.17 (dd,  $J = 7.5$  Hz,  $J = 7.5$  Hz, 1H), 6.89–6.84 (m, 2H), 6.75 (d,  $J = 8.5$  Hz, 1H), 6.16 (d,  $J = 8.5$  Hz, 1H), 2.59 (s, 3H).  $^{19}\text{F}$  NMR (375 MHz,  $\text{CDCl}_3$ , 23 °C,  $\delta$ ): -151.9 (s), -276.8 (br s).

**7-Methoxybenzo[*h*]quinolinyll palladium(IV) complex 8g**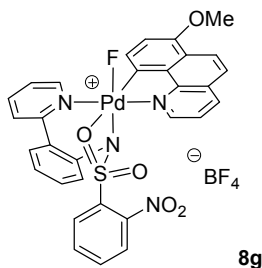

NMR Spectroscopy:  $^1\text{H}$  NMR (500 MHz, acetonitrile- $d_3$ , 25 °C,  $\delta$ ): 9.55 (d,  $J = 5.5$  Hz, 1H), 9.41 (d,  $J = 5.5$  Hz, 1H), 8.83 (d,  $J = 8.0$  Hz, 1H), 8.44 (dd,  $J = 8.0$  Hz, 1H), 8.35 (d,  $J = 7.5$  Hz, 1H), 8.14 (d,  $J = 9.0$  Hz, 1H), 8.01–7.97 (m, 2H), 7.91 (ddd,  $J = 8.0$  Hz,  $J = 8.0$  Hz,  $J = 1.5$  Hz, 1H), 7.75 (d,  $J = 8.0$  Hz, 1H), 7.59–7.52 (m, 2H), 7.43–7.36 (m, 2H), 7.18 (dd,  $J = 8.0$  Hz,  $J = 8.0$  Hz, 1H), 6.90 (dd,  $J = 7.0$  Hz,  $J = 7.0$  Hz, 1H), 6.78 (d,  $J = 8.0$  Hz,  $J = 8.0$  Hz, 1H), 6.48 (d,  $J = 9.0$  Hz, 1H), 6.19 (d,  $J = 9.0$  Hz, 1H), 3.86 (s, 3H).  $^{19}\text{F}$  NMR (375 MHz,  $\text{CDCl}_3$ , 23 °C,  $\delta$ ): -151.9 (s), -276.3 (br s).

## Kinetic experiments of C–F reductive elimination from Pd(IV) complexes

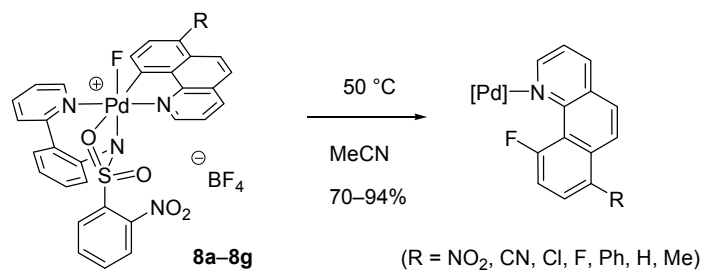

Solutions (33.3 mM) of compound **8a–8g** were prepared by reacting compound **S4**, **S42–S47** (0.020 mmol, 1.0 equiv) with 1-chloromethyl-4-fluoro-1,4-diazoniabicyclo [2.2.2]octane bis(tetrafluoroborate) (**S5**) (7.1 mg, 0.020 mmol, 1.0 equiv) in NMR tubes under nitrogen. NMR samples were placed in the preheated NMR machine (50 °C) and the disappearance of the compounds **8a–8g** and formation of the product were monitored by integrating the peak at around 6.3 ppm and 9.1 ppm, respectively, relative to the peak of 1-chloromethyl-1,4-diazoniabicyclo [2.2.2]octane (tetrafluoroborate) at 4.91 ppm.

**R = NO<sub>2</sub>**

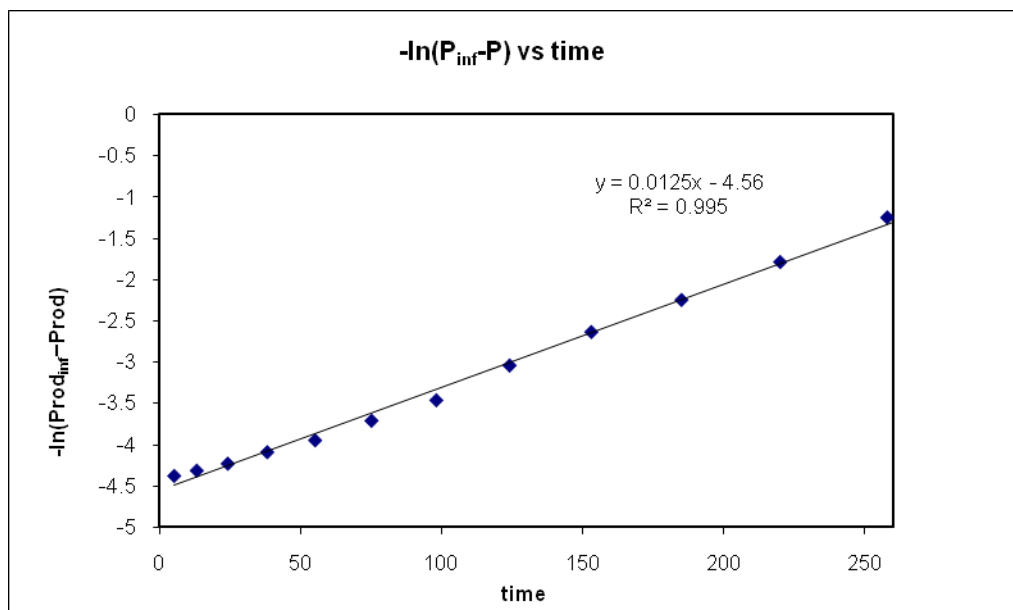

**R = CN**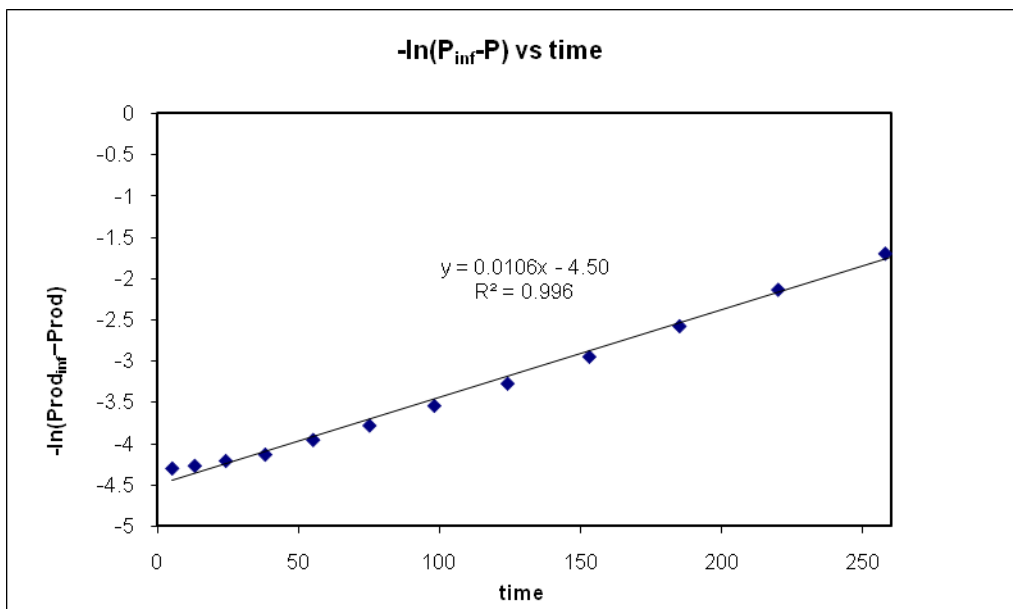**R = CHO**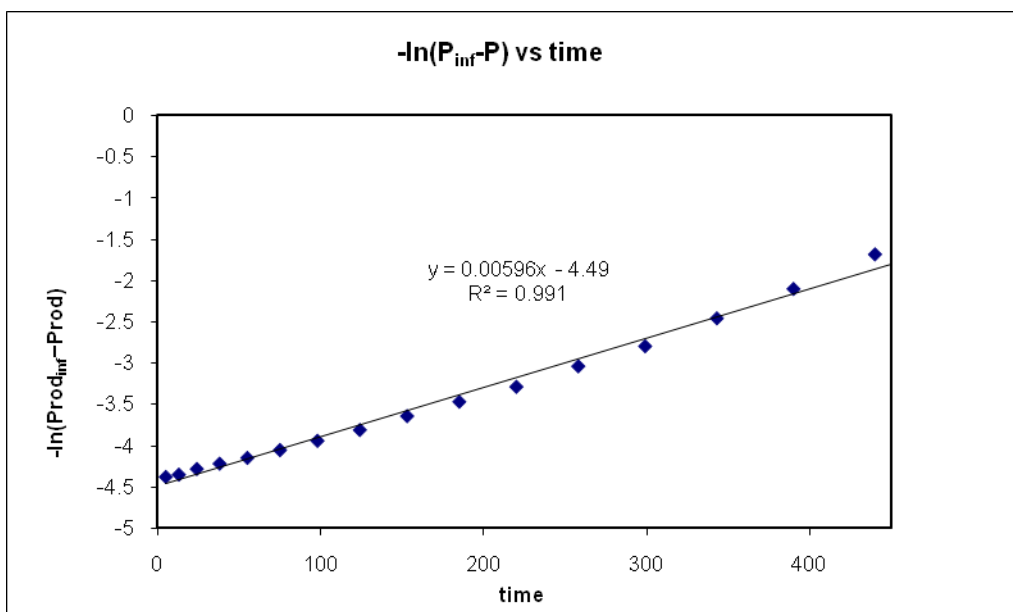

**R = Cl**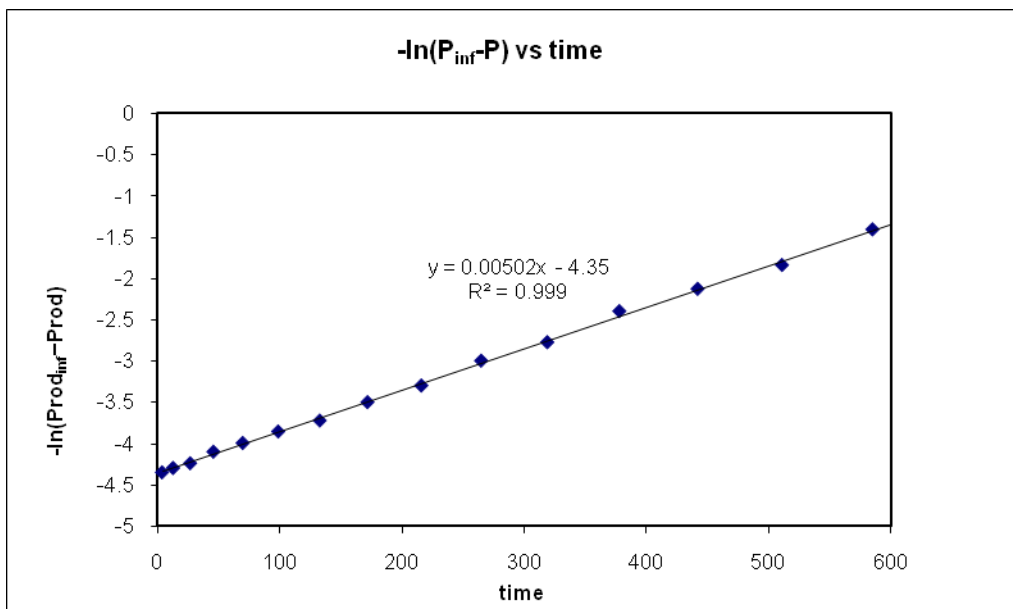**R = H**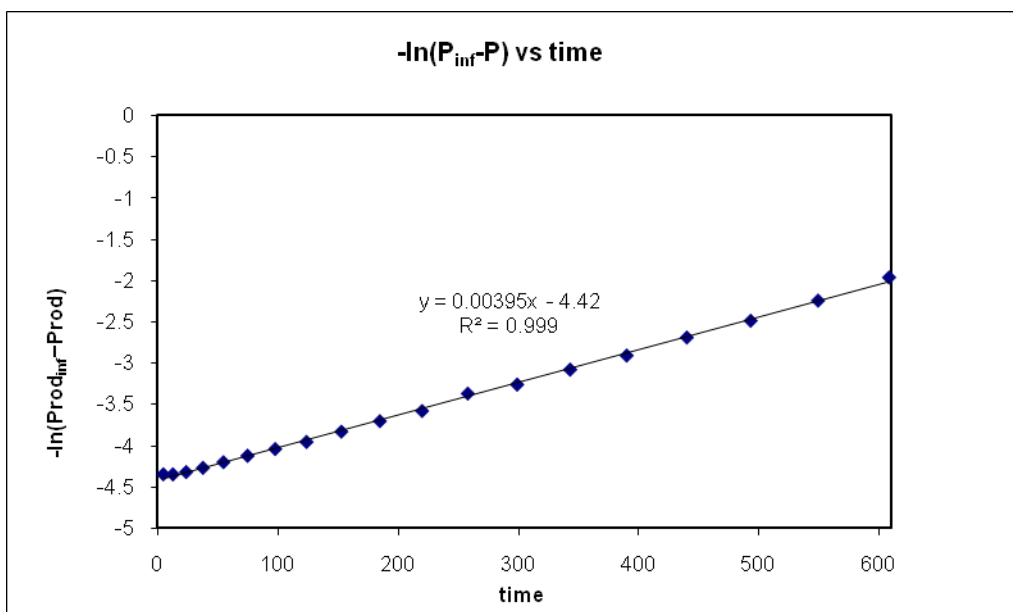

**R = Me**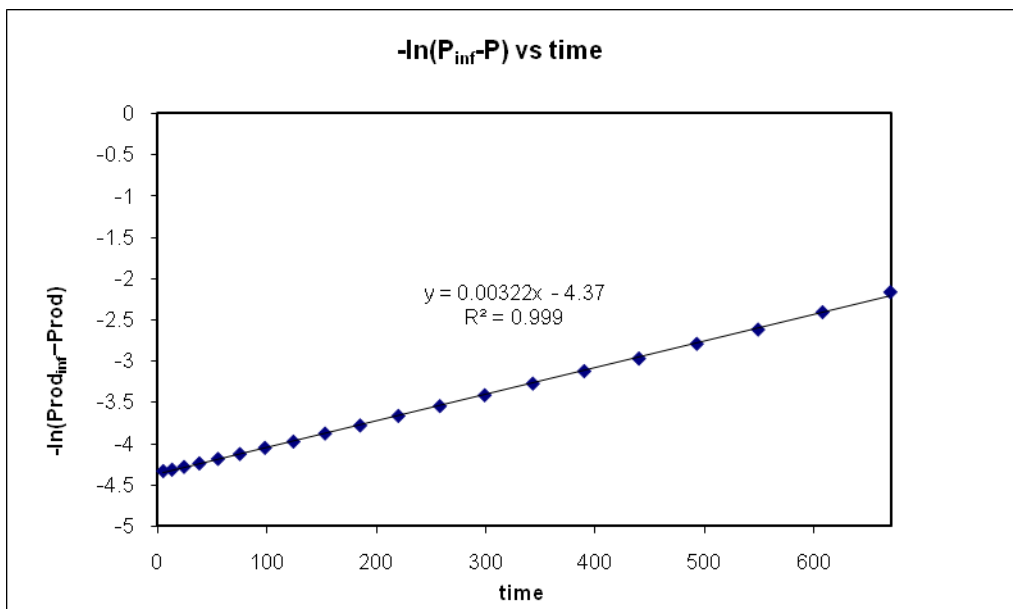**R = OMe**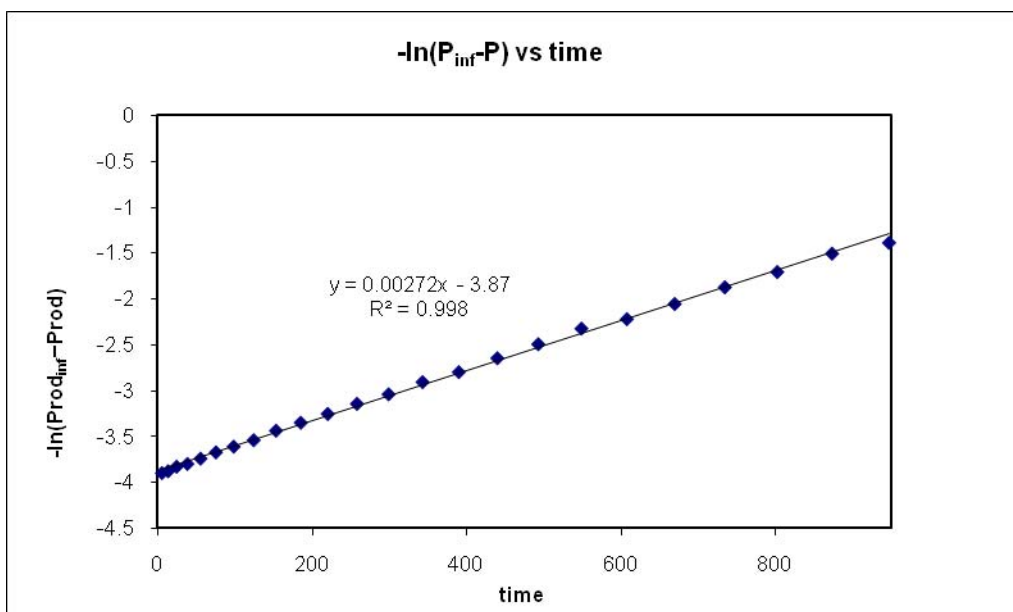

|                 | $\sigma$ | k       | $\ln(k_x/k_H)$ | Fluorination Yield (%) |
|-----------------|----------|---------|----------------|------------------------|
| NO <sub>2</sub> | 0.78     | 0.0125  | 1.15           | 94                     |
| CN              | 0.66     | 0.0106  | 0.990          | 92                     |
| CHO             | 0.44     | 0.00596 | 0.412          | 91                     |
| Cl              | 0.23     | 0.00502 | 0.239          | 71                     |
| H               | 0        | 0.00395 | 0              | 94                     |
| Me              | -0.17    | 0.00322 | -0.204         | 86                     |
| OMe             | -0.27    | 0.00272 | -0.374         | 70                     |

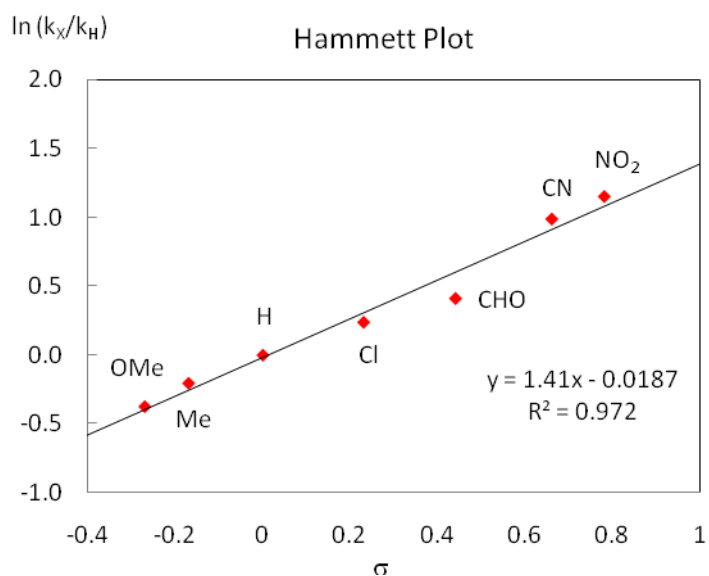

### Synthesis of monofluoro Pd(IV) pyridine complexes with different benzo[*h*]quinoline substitution

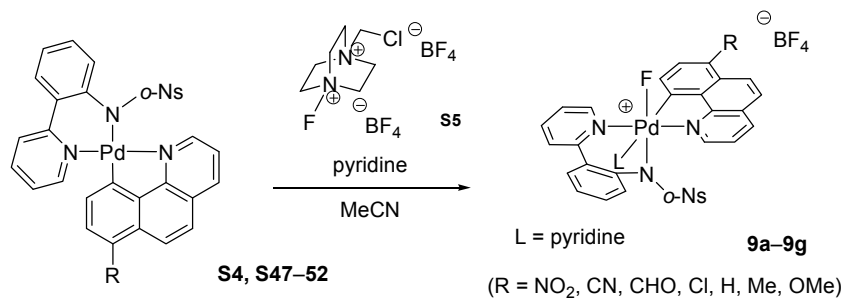

Solutions (33.3 mM) of compound **9a-9g** were prepared by reacting compound **S4, S47-S52** (0.020 mmol, 1.0 equiv) with 1-chloromethyl-4-fluoro-1,4-diazoniabicyclo [2.2.2]octane bis(tetrafluoroborate) (**S5**) (7.1 mg, 0.020 mmol, 1.0 equiv) and pyridine (2.4  $\mu$ L, 0.030 mmol, 1.50 equiv) in NMR tubes under

nitrogen. Compounds **9a–9g** were characterized by NMR spectroscopy in acetonitrile solution without purification.<sup>18</sup>

### 7-Nitrobenzo[*h*]quinolinyll palladium(IV) pyridine complex **9a**

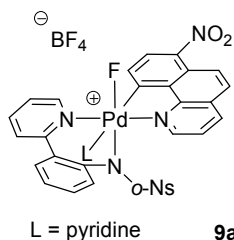

NMR Spectroscopy: <sup>1</sup>H NMR (500 MHz, acetonitrile-*d*<sub>3</sub>, 25 °C, δ): 8.96 (d, *J* = 6.0 Hz, 1H), 8.89 (d, *J* = 8.0 Hz, 1H), 8.72 (d, *J* = 9.0 Hz, 1H), 8.61–8.58 (m, 2H), 8.38 (dd, *J* = 7.5 Hz, *J* = 7.5 Hz, 1H), 8.28 (d, *J* = 9.0 Hz, 1H), 7.98 (dd, *J* = 7.5 Hz, *J* = 5.5 Hz, 1H), 7.87 (d, *J* = 9.0 Hz, 1H), 7.81 (d, *J* = 7.0 Hz, 1H), 7.60–7.57 (m, 2H), 7.50 (dd, *J* = 7.5 Hz, *J* = 7.5 Hz, 1H), 7.44 (d, *J* = 7.5 Hz, 1H), 7.35 (dd, *J* = 8.0 Hz, *J* = 8.0 Hz, 1H), 7.22 (dd, *J* = 7.5 Hz, *J* = 7.5 Hz, 1H), 6.87 (dd, *J* = 7.5 Hz, *J* = 7.5 Hz, 1H), 6.75 (d, *J* = 8.5 Hz, 1H), 6.55 (d, *J* = 9.0 Hz, 1H). <sup>19</sup>F NMR (375 MHz, CDCl<sub>3</sub>, 23 °C, δ): –151.8 (s), –264.1 (br s).

### 7-Cyanobenzo[*h*]quinolinyll palladium(IV) pyridine complex **9b**

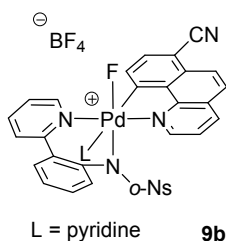

NMR Spectroscopy: <sup>1</sup>H NMR (500 MHz, acetonitrile-*d*<sub>3</sub>, 25 °C, δ): 8.93 (d, *J* = 5.5 Hz, 1H), 8.89 (d, *J* = 7.5 Hz, 1H), 8.60–8.56 (m, 2H), 8.38 (dd, *J* = 7.5 Hz, *J* = 7.5 Hz, 1H), 8.27–8.22 (m, 2H), 7.96 (dd, *J* = 8.0 Hz, *J* = 6.0 Hz, 1H), 7.80 (d, *J* = 7.5 Hz, 1H), 7.59–7.53 (m, 3H), 7.49 (dd, *J* = 6.0 Hz, *J* = 6.0 Hz, 1H), 7.43 (d, *J* = 8.0 Hz, 1H), 7.34 (dd, *J* = 8.0 Hz, *J* = 8.0 Hz, 1H), 7.21 (dd, *J* = 8.0 Hz, *J* = 8.0 Hz, 1H), 6.87 (dd, *J* = 6.5 Hz, *J* = 6.5 Hz, 1H), 6.74 (d, *J* = 8.5 Hz, 1H), 6.50 (d, *J* = 8.0 Hz, 1H). <sup>19</sup>F NMR (375 MHz, CDCl<sub>3</sub>, 23 °C, δ): –151.8 (s), –264.9 (br s).

<sup>18</sup> Compound **9e** and **2** are identical, but labeled like this for clarity

**7-Formylbenzo[*h*]quinolinyll palladium(IV) pyridine complex 9c**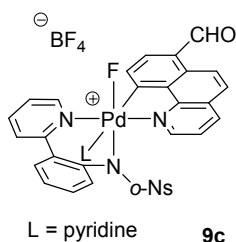

NMR Spectroscopy:  $^1\text{H}$  NMR (500 MHz, acetonitrile- $d_3$ , 25 °C,  $\delta$ ): 10.28 (s, 1H), 9.17 (d,  $J = 9.5$  Hz, 1H), 8.92 (d,  $J = 6.5$  Hz, 1H), 8.84 (d,  $J = 7.5$  Hz, 1H), 8.61 (d,  $J = 6.0$  Hz, 1H), 8.58 (d,  $J = 8.0$  Hz, 1H), 8.38 (dd,  $J = 8.0$  Hz,  $J = 8.0$  Hz, 1H), 8.21 (d,  $J = 8.5$  Hz, 1H), 7.92 (d,  $J = 7.5$  Hz, 1H), 7.82 (d,  $J = 8.0$  Hz, 1H), 7.63 (d,  $J = 8.5$  Hz, 1H), 7.58–7.54 (m, 2H), 7.49 (dd,  $J = 6.5$  Hz,  $J = 6.5$  Hz, 1H), 7.43 (d,  $J = 7.5$  Hz, 1H), 7.31 (dd,  $J = 8.0$  Hz,  $J = 8.0$  Hz, 1H), 7.20 (dd,  $J = 7.5$  Hz,  $J = 7.5$  Hz, 1H), 6.84 (dd,  $J = 8.0$  Hz,  $J = 8.0$  Hz, 1H), 6.74 (d,  $J = 8.0$  Hz, 1H), 6.60 (d,  $J = 8.0$  Hz, 1H).  $^{19}\text{F}$  NMR (375 MHz,  $\text{CDCl}_3$ , 23 °C,  $\delta$ ): -151.8 (s), -264.6 (br s).

**7-Chlorobenzo[*h*]quinolinyll palladium(IV) pyridine complex 9d**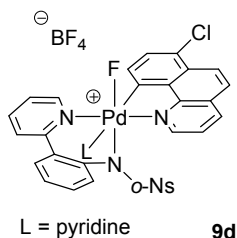

NMR Spectroscopy:  $^1\text{H}$  NMR (500 MHz, acetonitrile- $d_3$ , 25 °C,  $\delta$ ): 8.90 (d,  $J = 5.5$  Hz, 1H), 8.82 (d,  $J = 8.0$  Hz, 1H), 8.60 (d,  $J = 6.0$  Hz, 1H), 8.55 (d,  $J = 7.5$  Hz, 1H), 8.36 (dd,  $J = 8.0$  Hz,  $J = 8.0$  Hz, 1H), 8.28 (d,  $J = 9.0$  Hz, 1H), 8.14 (d,  $J = 9.5$  Hz, 1H), 7.90 (dd,  $J = 7.0$  Hz,  $J = 7.0$  Hz, 1H), 7.80 (d,  $J = 8.0$  Hz, 1H), 7.57–7.52 (m, 3H), 7.47 (dd,  $J = 6.0$  Hz,  $J = 6.0$  Hz, 1H), 7.43 (d,  $J = 7.5$  Hz, 1H), 7.30 (dd,  $J = 7.5$  Hz,  $J = 7.5$  Hz, 1H), 7.21 (dd,  $J = 9.5$  Hz,  $J = 9.5$  Hz, 1H), 6.89 (dd,  $J = 7.0$  Hz,  $J = 7.0$  Hz, 1H), 6.78 (d,  $J = 8.0$  Hz, 1H), 6.35 (d,  $J = 8.0$  Hz, 1H).  $^{19}\text{F}$  NMR (375 MHz,  $\text{CDCl}_3$ , 23 °C,  $\delta$ ): -151.8 (s), -264.3 (br s).



**7-Methylbenzo[*h*]quinolinyl palladium(IV) pyridine complex 9f**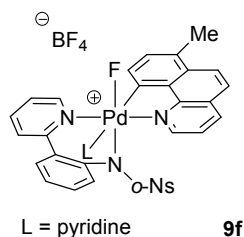

NMR Spectroscopy:  $^1\text{H}$  NMR (500 MHz, acetonitrile- $d_3$ , 25 °C,  $\delta$ ): 8.84 (d,  $J = 4.0$  Hz, 1H), 8.73 (d,  $J = 7.5$  Hz, 1H), 8.62 (s, 1H), 8.54 (d,  $J = 8.0$  Hz, 1H), 8.34 (dd,  $J = 7.0$  Hz,  $J = 7.0$  Hz, 1H), 8.15 (d,  $J = 8.0$  Hz, 1H), 8.01 (d,  $J = 9.0$  Hz, 1H), 7.83–7.81 (m, 2H), 7.53 (dd,  $J = 7.5$  Hz,  $J = 7.5$  Hz, 1H), 7.45–7.41 (m, 3H), 7.22–7.19 (m, 2H), 6.97 (d,  $J = 8.0$  Hz, 1H), 6.90 (dd,  $J = 8.0$  Hz,  $J = 8.0$  Hz, 1H), 6.79 (d,  $J = 7.5$  Hz, 1H), 6.27 (d,  $J = 8.5$  Hz, 1H), 2.65 (s, 3H).  $^{19}\text{F}$  NMR (375 MHz,  $\text{CDCl}_3$ , 23 °C,  $\delta$ ): -151.8 (s), -263.1 (br s).

**7-Methoxybenzo[*h*]quinolinyl palladium(IV) pyridine complex 9g**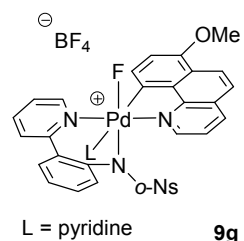

NMR Spectroscopy:  $^1\text{H}$  NMR (500 MHz, acetonitrile- $d_3$ , 25 °C,  $\delta$ ): 8.83 (d,  $J = 5.5$  Hz, 1H), 8.72 (d,  $J = 7.0$  Hz, 1H), 8.60 (s, 1H), 8.54 (dd,  $J = 7.0$  Hz,  $J = 7.0$  Hz, 1H), 8.34 (dd,  $J = 7.0$  Hz,  $J = 7.0$  Hz, 1H), 8.23 (d,  $J = 9.5$  Hz, 1H), 7.95 (d,  $J = 8.5$  Hz, 1H), 7.83–7.81 (m, 2H), 7.52 (dd,  $J = 12.5$  Hz,  $J = 7.5$  Hz, 1H), 7.47–7.41 (m, 3H), 7.23–7.20 (m, 2H), 6.92 (dd,  $J = 8.0$  Hz, 1H), 6.82 (d,  $J = 8.0$  Hz, 1H), 6.61 (d,  $J = 8.5$  Hz, 1H), 6.29 (d,  $J = 8.5$  Hz, 1H), 3.96 (s, 3H).  $^{19}\text{F}$  NMR (375 MHz,  $\text{CDCl}_3$ , 23 °C,  $\delta$ ): -151.8 (s), -262.8 (br s).

## Kinetic experiments of C–F reductive elimination from Pd(IV) pyridine complexes with different benzo[*h*]quinoline substitution

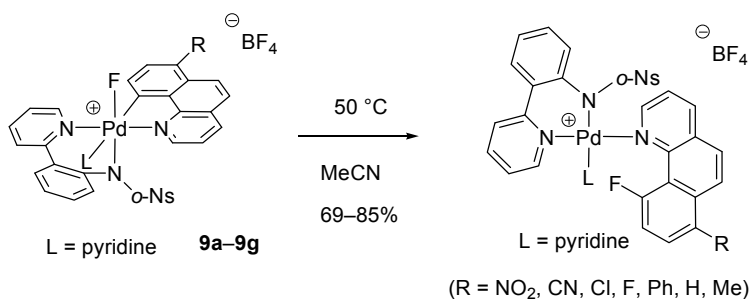

Solutions (33.3 mM) of compound **9a–9g** were prepared by reacting compound **S4**, **S47–S52** (0.020 mmol, 1.0 equiv) with 1-chloromethyl-4-fluoro-1,4-diazoniabicyclo [2.2.2]octane bis(tetrafluoroborate) (**S5**) (7.1 mg, 0.020 mmol, 1.0 equiv) and pyridine (2.4  $\mu$ L, 0.030 mmol, 1.50 equiv) in NMR tubes under nitrogen. NMR samples were placed in a preheated NMR machine and using array program, disappearance of the compound **9a–9g** was monitored by integrating the peak at around 6.40 ppm relative to the peak of 1-chloromethyl-1,4-diazoniabicyclo [2.2.2]octane (tetrafluoroborate) at 4.91 ppm. Monitoring product formation was difficult because the competing coordination of pyridine and 10-fluorobenzo[*h*]quinoline derivatives complicates the <sup>1</sup>H NMR spectra.

R = NO<sub>2</sub>

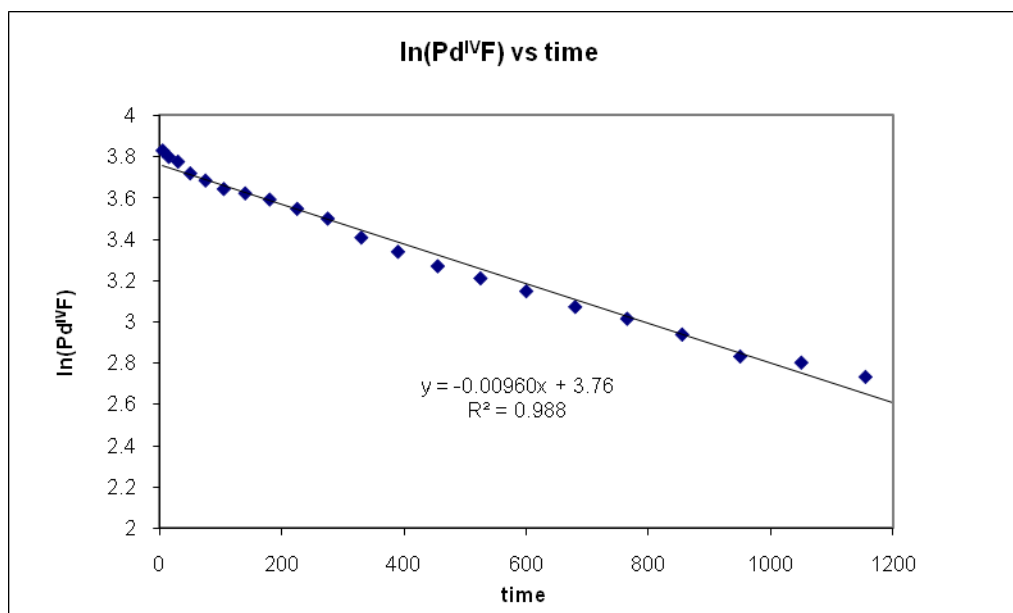

**R = CN**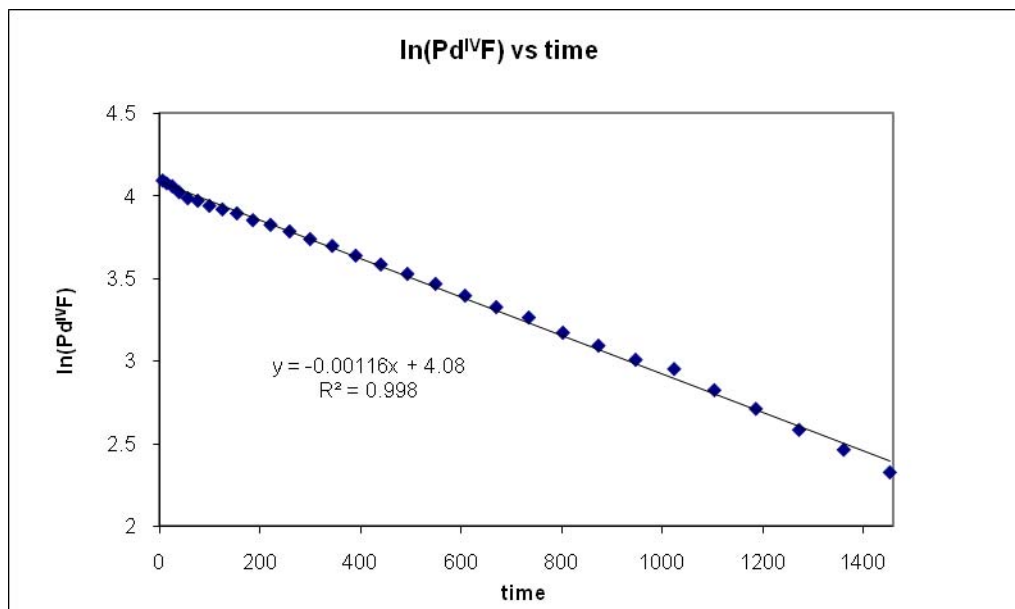**R = CHO**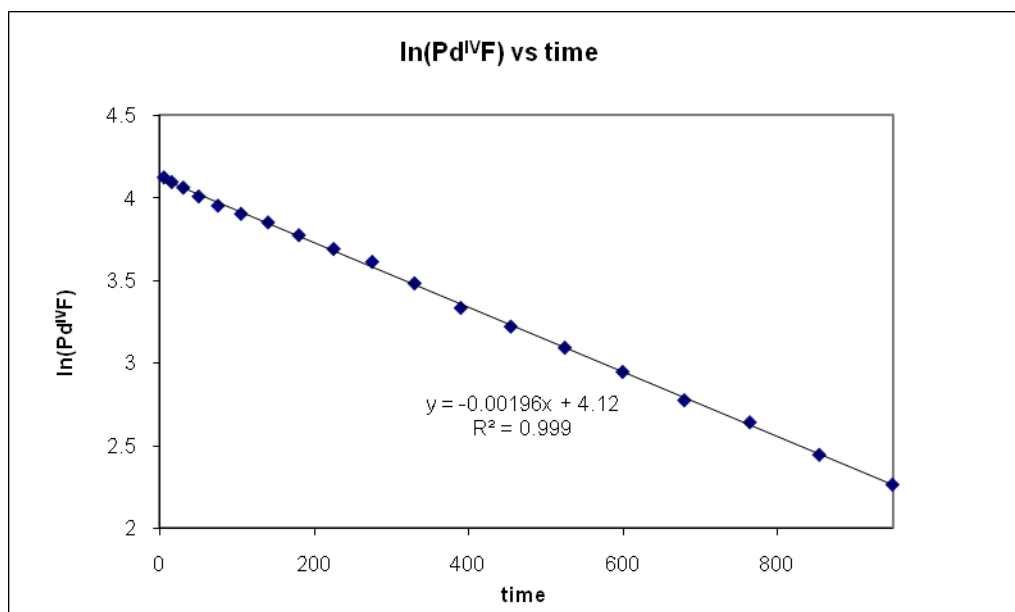

**R = Cl**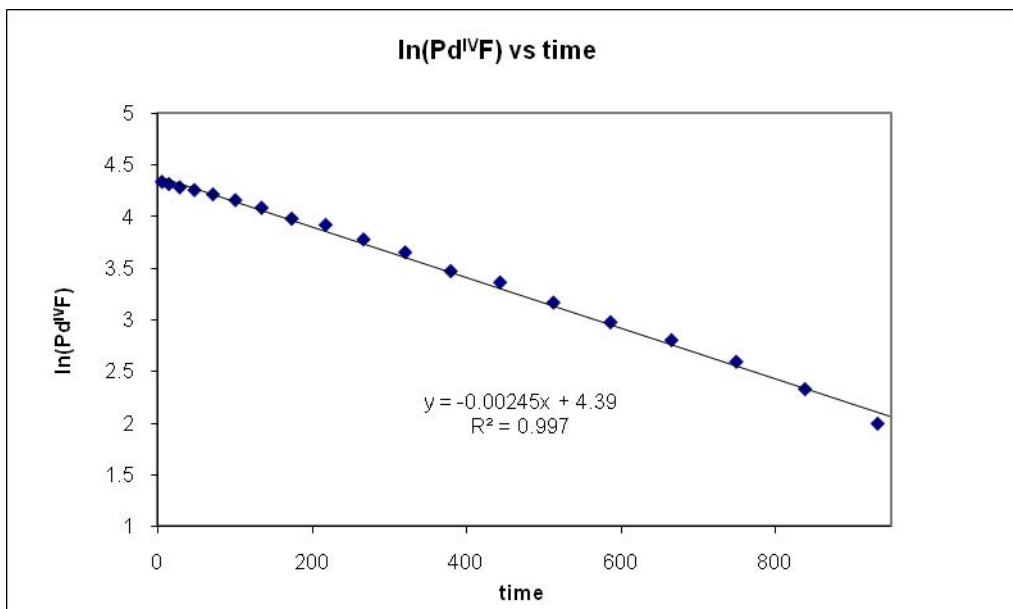**R = H**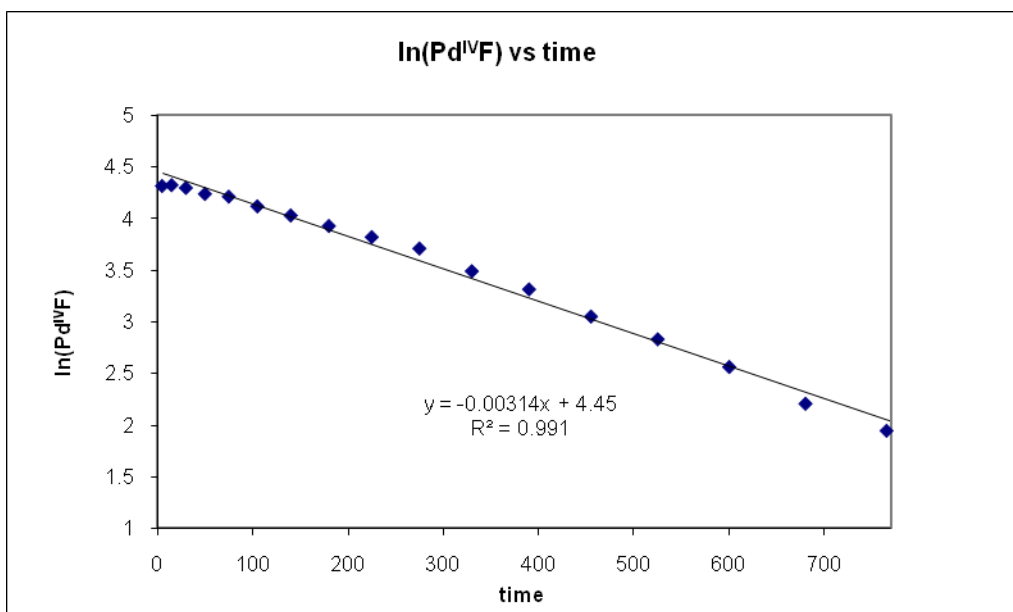

**R = Me**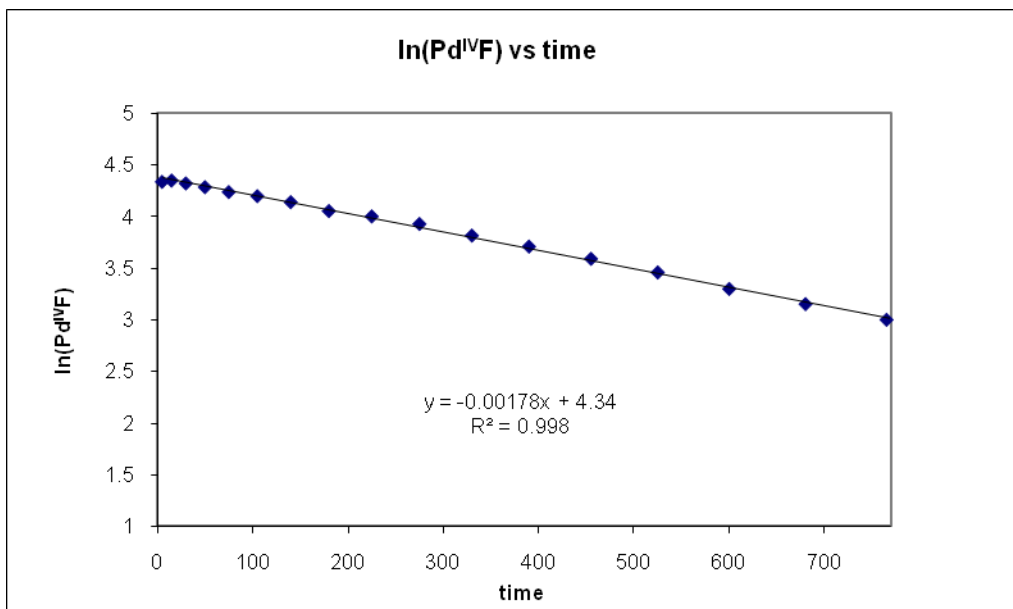**R = OMe**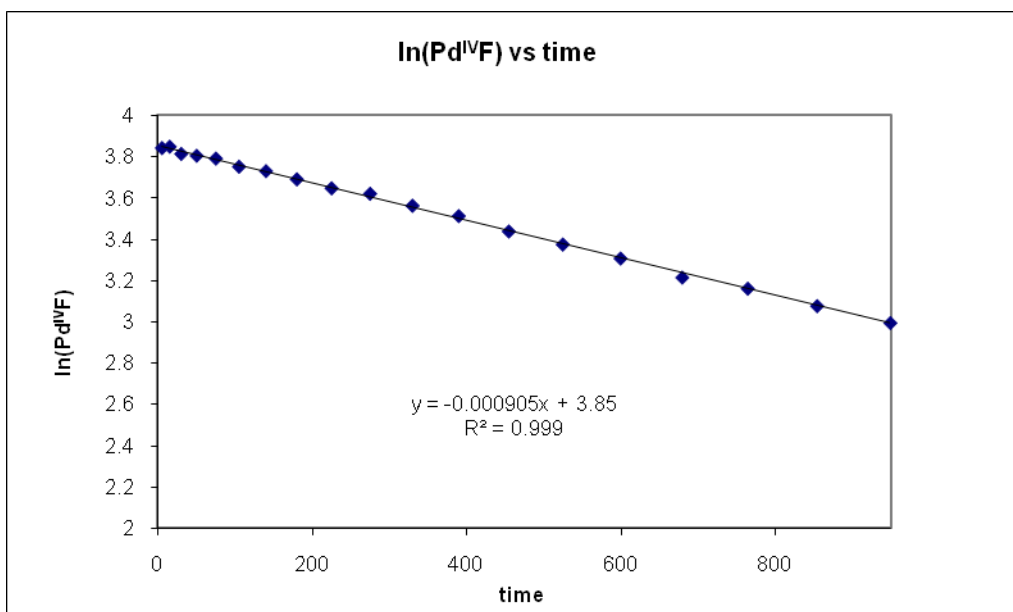

|                 | $\sigma$ | k        | $\ln(k_x/k_H)$ | Fluorination Yield (%) |
|-----------------|----------|----------|----------------|------------------------|
| NO <sub>2</sub> | 0.78     | 0.00960  | -1.19          | 85                     |
| CN              | 0.66     | 0.00116  | -0.996         | 83                     |
| CHO             | 0.44     | 0.00196  | -0.474         | 83                     |
| Cl              | 0.23     | 0.00245  | -0.248         | 69                     |
| H               | 0        | 0.00314  | 0              | 85                     |
| Me              | -0.17    | 0.00179  | -0.565         | 80                     |
| OMe             | -0.27    | 0.000905 | -1.24          | 72                     |

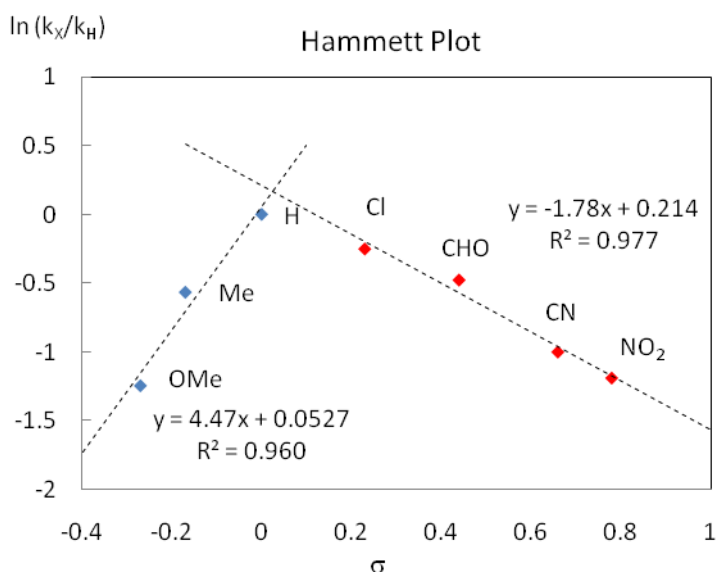

## Synthesis of substituted 10-fluorobenzo[*h*]quinolines

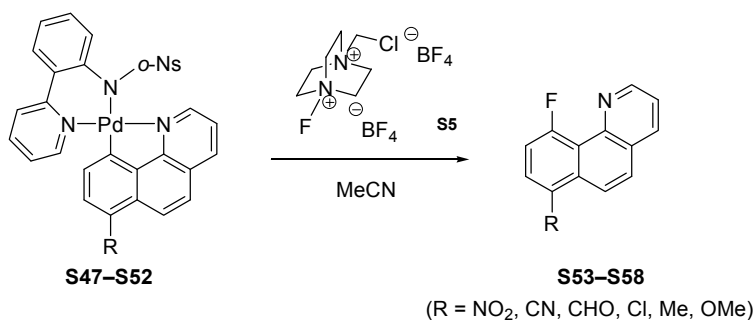

To benzo[*h*]quinolinyl palladium(II) pyridine-sulfonamido complex **S47–S52** (0.0500 mmol, 1.00 equiv) in acetonitrile (1.5 mL) at 23 °C was added 1-chloromethyl-4-fluoro-1,4-diazoniabicyclo [2.2.2]octane bis(tetrafluoroborate) (**S5**) (17.8 mg, 0.0500 mmol, 1.00 equiv). After being stirred for 10 min at 23 °C, the reaction mixture was warmed to 50 °C and further stirred for 1.0 hr. After being cooled to 23 °C, the

reaction mixture was added pyridine (19.8 mg, 20.0  $\mu\text{L}$ , 0.250 mmol, 5.00 equiv) and concentrated in vacuo. The resulting solid was dissolved in  $\text{CH}_2\text{Cl}_2$  (2 mL) and was added  $\text{H}_2\text{O}$  (2 mL). The phases were separated and the aqueous layer was extracted with  $\text{CH}_2\text{Cl}_2$  ( $3 \times 1$  mL). The combined organic phases were washed with brine (3 mL) and dried ( $\text{Na}_2\text{SO}_4$ ). The filtrate was concentrated in vacuo and the residue was purified by preparative TLC.

### 7-Nitro-10-fluorobenzo[*h*]quinoline (S53)

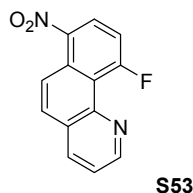

$R_f = 0.10$  (EtOAc/hexanes 1:9 (v/v)). NMR Spectroscopy:  $^1\text{H}$  NMR (500 MHz,  $\text{CDCl}_3$ , 25  $^\circ\text{C}$ ,  $\delta$ ): 9.20–9.19 (m, 1H), 8.48 (dd,  $J = 11.5$  Hz,  $J = 2.0$  Hz, 1H), 8.34 (dd,  $J = 11.0$  Hz,  $J = 5.0$  Hz, 1H), 8.29 (dd,  $J = 10.0$  Hz,  $J = 2.5$  Hz, 1H), 7.97 (d,  $J = 9.2$  Hz, 1H), 7.68 (dd,  $J = 8.4$  Hz,  $J = 4.4$  Hz, 1H), 7.52 (dd,  $J = 12.0$  Hz,  $J = 8.8$  Hz, 1H).  $^{13}\text{C}$  NMR (125 MHz,  $\text{CDCl}_3$ , 25  $^\circ\text{C}$ ,  $\delta$ ): 163.8 (d,  $J = 271.4$ ), 150.3, 145.2 (d,  $J = 8.3$  Hz), 143.4, 136.0, 130.4, 129.0, 126.9, 126.3, 126.2, 123.0, 121.2, 113.7 (d,  $J = 12.8$ ).  $^{19}\text{F}$  NMR (375 MHz,  $\text{CDCl}_3$ , 23  $^\circ\text{C}$ ,  $\delta$ ): –96.0 (d,  $J = 12.4$  Hz). Mass Spectrometry: HRMS-FIA (m/z): Calcd for  $[\text{C}_{13}\text{H}_7\text{FN}_2\text{O}_2 + \text{H}]$ , 243.05643. Found, 243.05637.

### 7-Chloro-10-fluorobenzo[*h*]quinoline (S54)

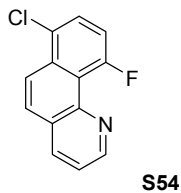

$R_f = 0.25$  (EtOAc/hexanes 1:9 (v/v)). NMR Spectroscopy:  $^1\text{H}$  NMR (400 MHz,  $\text{CDCl}_3$ , 25  $^\circ\text{C}$ ,  $\delta$ ): 9.16 (m, 1H), 8.30 (dd,  $J = 9.2$  Hz,  $J = 2.0$  Hz, 1H), 8.25 (dd,  $J = 8.4$  Hz,  $J = 2.0$  Hz, 1H), 7.85 (d,  $J = 9.2$  Hz, 1H), 7.73 (dd,  $J = 8.4$  Hz,  $J = 4.0$  Hz, 1H), 7.61 (dd,  $J = 8.0$  Hz,  $J = 4.0$  Hz, 1H), 7.40 (dd,  $J = 12.4$  Hz,  $J = 8.4$  Hz, 1H).  $^{13}\text{C}$  NMR (125 MHz,  $\text{CDCl}_3$ , 25  $^\circ\text{C}$ ,  $\delta$ ): 160.0 (d,  $J = 260.2$  Hz, 1H), 149.7, 145.7 (d,  $J = 8.4$  Hz), 135.9, 132.8 (d,  $J = 2.3$  Hz), 128.7 (d,  $J = 9.1$  Hz), 128.0, 127.1, 127.1, 123.6 (d,  $J = 2.3$  Hz), 122.3 (d,  $J = 2.3$  Hz), 121.6 (d,  $J = 6.8$  Hz), 114.7 (d,  $J = 25.0$  Hz).  $^{19}\text{F}$  NMR (375 MHz,  $\text{CDCl}_3$ , 23  $^\circ\text{C}$ ,  $\delta$ ): –109.4 (d,  $J = 12.0$  Hz). Mass Spectrometry: HRMS-FIA (m/z): Calcd for  $[\text{C}_{13}\text{H}_7\text{ClFN} + \text{H}]$ , 232.03238. Found, 232.03256.

**7-Cyano-10-fluorobenzo[*h*]quinoline (S55)**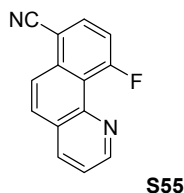

$R_f = 0.10$  (EtOAc/hexanes 1:9 (v/v)). NMR Spectroscopy:  $^1\text{H}$  NMR (500 MHz,  $\text{CDCl}_3$ , 25 °C,  $\delta$ ): 9.20–9.19 (m, 1H), 8.30 (dd,  $J = 8.0$  Hz,  $J = 2.0$  Hz, 1H), 8.26 (dd,  $J = 9.0$  Hz,  $J = 2.0$  Hz, 1H), 8.07 (dd,  $J = 8.0$  Hz,  $J = 4.5$  Hz, 1H), 7.97 (d,  $J = 9.0$  Hz, 1H), 7.66 (dd,  $J = 8.0$  Hz,  $J = 4.5$  Hz, 1H), 7.52 (dd,  $J = 12.0$  Hz,  $J = 8.0$  Hz, 1H).  $^{13}\text{C}$  NMR (125 MHz,  $\text{CDCl}_3$ , 25 °C,  $\delta$ ): 163.9 (d,  $J = 271.3$  Hz), 150.2, 145.5 (d,  $J = 8.3$  Hz), 137.0, 136.2, 134.5 (d,  $J = 10.9$  Hz), 130.0, 127.3, 124.0, 122.8, 120.9, 117.4, 114.7 (d,  $J = 24.5$  Hz), 106.5.  $^{19}\text{F}$  NMR (375 MHz,  $\text{CDCl}_3$ , 23 °C,  $\delta$ ): –96.8 (d,  $J = 3.6$  Hz). Mass Spectrometry: HRMS-FIA ( $m/z$ ): Calcd for  $[\text{C}_{14}\text{H}_7\text{FN}_2 + \text{H}]$ , 223.06660. Found, 223.06637.

**7-Formyl-10-fluorobenzo[*h*]quinoline (S56)**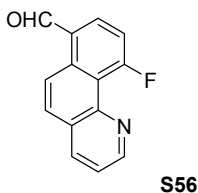

$R_f = 0.08$  (EtOAc/hexanes 1:9 (v/v)). NMR Spectroscopy:  $^1\text{H}$  NMR (500 MHz,  $\text{CDCl}_3$ , 25 °C,  $\delta$ ): 10.54 (s, 1H), 9.34 (dd,  $J = 9.0$  Hz,  $J = 2.0$  Hz, 1H), 9.18–9.17 (m, 1H), 8.27 (dd,  $J = 8.0$  Hz,  $J = 1.5$  Hz, 1H), 8.18 (dd,  $J = 8.0$  Hz,  $J = 4.5$  Hz, 1H), 7.96 (d,  $J = 9.5$  Hz, 1H), 7.65–7.57 (m, 2H).  $^{13}\text{C}$  NMR (125 MHz,  $\text{CDCl}_3$ , 25 °C,  $\delta$ ): 192.1, 165.0 (d,  $J = 272.1$  Hz), 149.9, 138.1, 138.0, 135.8, 135.3, 130.1, 127.1, 123.1, 123.1, 122.5, 120.7, 114.2 (d,  $J = 24.5$  Hz).  $^{19}\text{F}$  NMR (375 MHz,  $\text{CDCl}_3$ , 23 °C,  $\delta$ ): –95.4. Mass Spectrometry: HRMS-FIA ( $m/z$ ): Calcd for  $[\text{C}_{14}\text{H}_8\text{FNO} + \text{H}]$ , 226.06627. Found, 226.06605.

**7-Methyl-10-fluorobenzo[*h*]quinoline (S57)**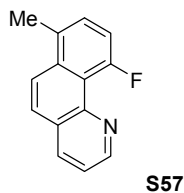

$R_f = 0.25$  (EtOAc/hexanes 1:9 (v/v)). NMR Spectroscopy:  $^1\text{H}$  NMR (500 MHz,  $\text{CDCl}_3$ , 25 °C,  $\delta$ ): 9.14–9.12 (m, 1H), 8.20 (dd,  $J = 8.0$  Hz,  $J = 1.5$  Hz, 1H), 7.98 (dd,  $J = 9.0$  Hz,  $J = 2.0$  Hz, 1H), 7.75 (d,  $J = 8.0$



Hz, 1H), 7.55 (dd,  $J = 8.0$  Hz,  $J = 5.5$  Hz, 1H), 7.48 (ddd,  $J = 8.0$  Hz,  $J = 4.5$  Hz,  $J = 0.5$  Hz, 1H), 7.35 (dd,  $J = 13.0$  Hz,  $J = 8.0$  Hz, 1H), 2.73 (s, 3H).  $^{13}\text{C}$  NMR (125 MHz,  $\text{CDCl}_3$ , 25 °C,  $\delta$ ): 159.9 (d,  $J = 256.8$  Hz), 149.2, 146.3 (d,  $J = 8.3$  Hz), 135.6, 134.4, 130.1 ( $J = 4.6$  Hz), 129.4 (d,  $J = 9.0$  Hz), 126.8, 126.4, 123.9 (d,  $J = 2.8$  Hz), 121.6 (d,  $J = 2.8$  Hz), 120.3 (5.4 Hz), 113.9 ( $J = 22.8$  Hz).  $^{19}\text{F}$  NMR (375 MHz,  $\text{CDCl}_3$ , 23 °C,  $\delta$ ): -112.1 (d,  $J = 4.4$  Hz). Mass Spectrometry: HRMS-FIA ( $m/z$ ): Calcd for  $[\text{C}_{14}\text{H}_{10}\text{FN} + \text{H}]$ , 212.08700. Found, 212.08709.

### 7-Methoxy-10-fluorobenzo[*h*]quinoline (S58)

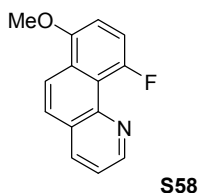

$R_f = 0.20$  (EtOAc/hexanes 1:9 (v/v)). NMR Spectroscopy:  $^1\text{H}$  NMR (500 MHz,  $\text{CDCl}_3$ , 25 °C,  $\delta$ ): 9.13–9.12 (m, 1H), 8.31 (dd,  $J = 8.5$  Hz,  $J = 1.5$  Hz, 1H), 8.21 (d,  $J = 8.0$  Hz, 1H), 7.72 (d,  $J = 8.0$  Hz, 1H), 7.56 (d,  $J = 8.0$  Hz,  $J = 4.5$  Hz, 1H), 7.38 (dd,  $J = 13.0$  Hz,  $J = 8.5$  Hz, 1H), 7.04 (dd,  $J = 8.5$  Hz,  $J = 3.0$  Hz, 1H), 4.04 (s, 3H).  $^{13}\text{C}$  NMR (125 MHz,  $\text{CDCl}_3$ , 25 °C,  $\delta$ ): 155.5 ( $J = 256.3$  Hz), 151.7, 149.4, 146.0, 136.0, 127.7, 126.6, 126.0, 122.0, 121.7, 121.1, 114.0 ( $J = 25.5$  Hz), 107.6 ( $J = 9.1$  Hz), 56.4.  $^{19}\text{F}$  NMR (375 MHz,  $\text{CDCl}_3$ , 23 °C,  $\delta$ ): -120.0. Mass Spectrometry: HRMS-FIA ( $m/z$ ): Calcd for  $[\text{C}_{14}\text{H}_{10}\text{FNO} + \text{H}]$ , 228.08192. Found, 228.08238.

## Synthesis of Pd(II) complexes with mixed ligands

### 7-Nitrobenzoquinolinyl-benzenesulfonanilido palladium(II) complex (S59)

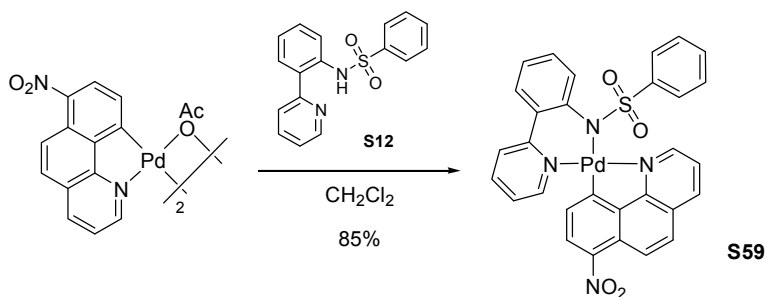

To 7-nitrobenzo[*h*]quinolinyl palladium acetate dimer (38.9 mg, 0.100 mmol, 1.00 equiv) in  $\text{CH}_2\text{Cl}_2$  (1 mL) at 23 °C was added the substituted pyridinylsulfonanilide ligand **S12** (31.0 mg, 0.100 mmol, 1.00 equiv). After stirring for 1.0 hr the reaction mixture was concentrated in vacuo. The resulting residue was triturated with  $\text{Et}_2\text{O}$  ( $3 \times 1$  mL) to afford 54 mg of palladium(II) complex **S59** (85% yield).

NMR Spectroscopy:  $^1\text{H}$  NMR (500 MHz,  $\text{CDCl}_3$ , 23 °C,  $\delta$ ): 9.62 (d,  $J = 5.0$  Hz, 1H), 8.72 (d,  $J = 5.5$  Hz, 1H), 8.42 (d,  $J = 9.0$  Hz, 1H), 8.24 (d,  $J = 7.5$  Hz, 1H), 8.03 (d,  $J = 8.0$  Hz, 1H), 7.87 (d,  $J = 9.0$  Hz, 1H), 7.71–7.60 (m, 3H), 7.53 (dd,  $J = 8.0$  Hz,  $J = 8.0$  Hz, 1H), 7.43 (d,  $J = 8.0$  Hz, 1H), 7.35–7.22 (m, 4H), 7.11–7.05 (m, 2H), 6.98–6.92 (m, 3H).  $^{13}\text{C}$  NMR (125 MHz,  $\text{CDCl}_3$ , 23 °C,  $\delta$ ): 167.5, 157.5, 153.7, 153.1, 151.6, 143.2, 142.8, 141.8, 141.7, 138.9, 137.6, 136.2, 131.8, 130.2, 130.0, 129.5, 129.2, 128.0, 127.4, 126.7, 125.6, 125.3, 125.0, 124.7, 124.5, 124.0, 123.7, 122.8. Mass Spectrometry: HRMS-FIA ( $m/z$ ): Calcd for  $[\text{C}_{34}\text{H}_{28}\text{N}_4\text{O}_4\text{PdS} + \text{H}]$ , 695.09443. Found, 695.09488.

### 7-Nitrobenzoquinolinyl-4-*tert*-butylbenzenesulfonanilido palladium(II) complex (S60)

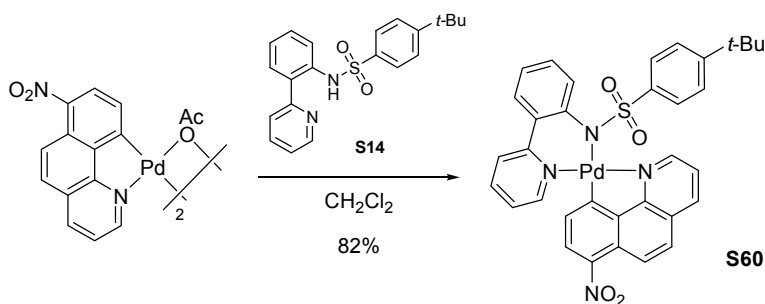

To 7-nitrobenzo[*h*]quinolinyl palladium acetate dimer (38.9 mg, 0.100 mmol, 1.00 equiv) in  $\text{CH}_2\text{Cl}_2$  (1 mL) at 23 °C was added the substituted pyridinylsulfonanilide ligand **S14** (32.4 mg, 0.100 mmol, 1.00 equiv). After stirring for 1.0 hr the reaction mixture was concentrated in vacuo. The resulting residue was triturated with  $\text{Et}_2\text{O}$  ( $3 \times 1$  mL) to afford 57 mg of palladium(II) complex **S60** (82% yield).

NMR Spectroscopy:  $^1\text{H}$  NMR (500 MHz,  $\text{CDCl}_3$ , 23 °C,  $\delta$ ): 9.64 (d,  $J = 5.0$  Hz, 1H), 8.75 (d,  $J = 5.5$  Hz, 1H), 8.44 (d,  $J = 9.0$  Hz, 1H), 8.26 (d,  $J = 7.5$  Hz, 1H), 8.04 (d,  $J = 8.0$  Hz, 1H), 7.87 (d,  $J = 9.0$  Hz, 1H), 7.67–7.61 (m, 3H), 7.53 (dd,  $J = 8.0$  Hz,  $J = 7.5$  Hz, 1H), 7.43 (d,  $J = 8.0$  Hz, 1H), 7.32 (dd,  $J = 7.0$  Hz,  $J = 6.5$  Hz, 1H), 7.26–7.19 (m, 3H), 7.08 (d,  $J = 8.0$  Hz, 1H), 6.99–6.93 (m, 3H), 1.23 (s, 9H).  $^{13}\text{C}$  NMR (125 MHz,  $\text{CDCl}_3$ , 23 °C,  $\delta$ ): 167.7, 157.6, 153.8, 153.2, 151.7, 142.9, 141.9, 141.8, 140.5, 138.7, 137.6, 136.2, 131.8, 130.4, 130.0, 129.2, 127.4, 126.4, 125.4, 125.3, 124.9, 124.8, 124.4, 124.0, 123.5, 122.8, 34.6, 31.2. Mass Spectrometry: HRMS-FIA ( $m/z$ ): Calcd for  $[\text{C}_{34}\text{H}_{28}\text{N}_4\text{O}_4\text{PdS} + \text{H}]$ , 695.09443. Found, 695.09488.

### 7-Nitrobenzoquinolinyl-4-methylpyridylsulfonanilido palladium(II) complex (**S61**)

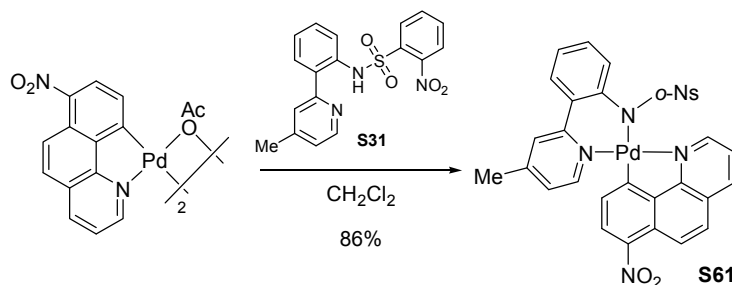

To 7-nitrobenzo[*h*]quinolinyl palladium acetate dimer (38.9 mg, 0.100 mmol, 1.00 equiv) in CH<sub>2</sub>Cl<sub>2</sub> (1 mL) at 23 °C was added the substituted pyridinylsulfonanilide ligand **S31** (36.9 mg, 0.100 mmol, 1.00 equiv). After stirring for 1.0 hr the reaction mixture was concentrated in vacuo. The resulting residue was triturated with Et<sub>2</sub>O (3 × 1 mL) to afford 60 mg of palladium(II) complex **S61** (86% yield).

NMR Spectroscopy: <sup>1</sup>H NMR (500 MHz, CDCl<sub>3</sub>, 25 °C, δ): 9.65 (d, *J* = 5.0 Hz, 1H), 8.74 (d, *J* = 3.0 Hz, 1H), 8.73 (s, 1H), 8.40 (d, *J* = 9.0 Hz, 1H), 8.20 (d, *J* = 8.5 Hz, 1H), 7.88 (d, *J* = 9.0 Hz, 1H), 7.77–7.72 (m, 2H), 7.52 (dd, *J* = 8.0 Hz, *J* = 8.0 Hz, 1H), 7.45–7.40 (m, 2H), 7.30–7.22 (m, 2H), 7.18–7.13 (m, 2H), 7.08–6.98 (m, 3H), 2.33 (s, 3H). Mass Spectrometry: HRMS-FIA (*m/z*): Calcd for [C<sub>14</sub>H<sub>10</sub>FNO + H], 698.03256. Found, 698.03190.<sup>19</sup>

### Synthesis of Pd(IV) complexes with mixed ligands

#### 7-Nitrobenzoquinolinyl-benzenesulfonanilido palladium(IV) complex (**S62**)

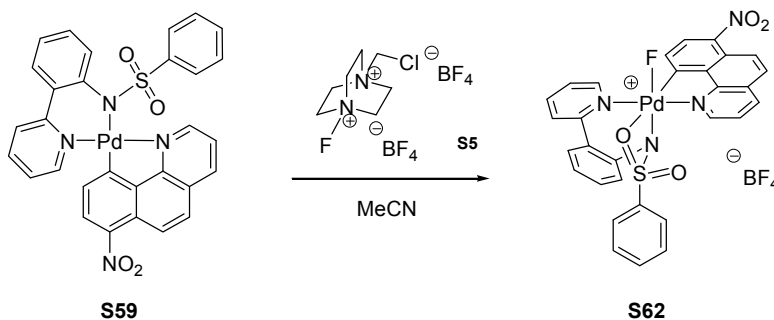

A solution (33.3 mM) of compound **S62** was prepared by reacting compound **S59** (12.8 mg, 0.0200 mmol, 1.00 equiv) with 1-chloromethyl-4-fluoro-1,4-diazoniabicyclo [2.2.2]octane bis(tetrafluoroborate) (**S5**) (7.1 mg, 0.020 mmol, 1.0 equiv) in NMR tubes under nitrogen. Compound **S62** was characterized by NMR spectroscopy in acetonitrile solution without purification.

<sup>19</sup> The <sup>13</sup>C NMR spectrum of this compound has a low signal-to-noise ratio due to the low solubility in common organic solvents.

NMR Spectroscopy:  $^1\text{H}$  NMR (500 MHz, acetonitrile- $d_3$ , 5 °C,  $\delta$ ): 9.83 (d,  $J$  = 6.0 Hz, 1H), 9.42 (d,  $J$  = 6.0 Hz, 1H), 9.03 (d,  $J$  = 8.0 Hz, 1H), 8.69 (d,  $J$  = 9.0 Hz, 1H), 8.35(d,  $J$  = 9.0 Hz, 1H), 8.24–8.15 (m, 2H), 7.90 (dd,  $J$  = 8.0 Hz,  $J$  = 7.5 Hz, 1H), 7.82 (d,  $J$  = 9.0 Hz, 1H), 7.70 (d,  $J$  = 7.5 Hz, 1H), 7.45–7.40 (m, 1H), 7.33–7.20 (m, 4H), 7.12–7.05 (m, 2H), 6.99 (dd,  $J$  = 8.0 Hz,  $J$  = 7.5 Hz, 1H), 6.81 (d,  $J$  = 8.5 Hz, 1H), 6.48 (d,  $J$  = 9.0 Hz, 1H).  $^{19}\text{F}$  NMR (375 MHz, acetonitrile- $d_3$ , 5 °C,  $\delta$ ): -152.0 (s), -276.2 (s).

### 7-Nitrobenzoquinolinyl-4-*tert*-butylbenzenesulfonanilido palladium(IV) complex (S63)

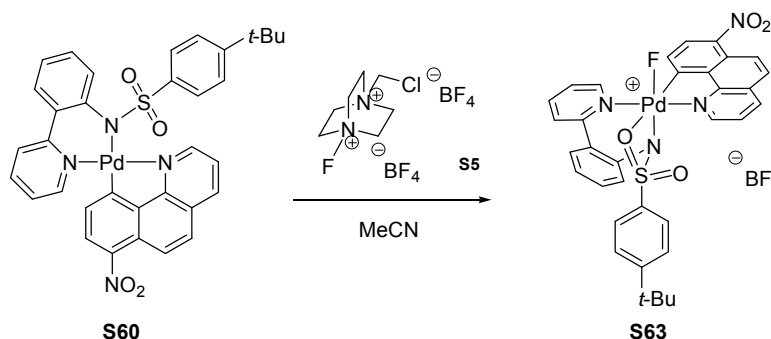

Solution (33.3 mM) of compound **S63** was prepared by reacting compound **S60** (13.9 mg, 0.0200 mmol, 1.00 equiv) with 1-chloromethyl-4-fluoro-1,4-diazoniabicyclo [2.2.2]octane bis(tetrafluoroborate) (**S5**) (7.1 mg, 0.020 mmol, 1.0 equiv) in NMR tubes under nitrogen. Compound **S63** was characterized by NMR spectroscopy in acetonitrile solution without purification.

NMR Spectroscopy:  $^1\text{H}$  NMR (500 MHz, acetonitrile- $d_3$ , 25 °C,  $\delta$ ): 9.77 (d,  $J$  = 6.0 Hz, 1H), 9.35 (d,  $J$  = 6.0 Hz, 1H), 8.98 (d,  $J$  = 8.0 Hz, 1H), 8.64 (d,  $J$  = 9.0 Hz, 1H), 8.32 (d,  $J$  = 9.0 Hz, 1H), 8.28 (dd,  $J$  = 8.0 Hz,  $J$  = 8.0 Hz, 1H), 8.17 (dd,  $J$  = 8.0 Hz,  $J$  = 6.0 Hz, 1H), 8.04 (d,  $J$  = 7.0 Hz, 1H), 7.82–7.75 (m, 2H), 7.65 (d,  $J$  = 6.5 Hz, 1H), 7.30–7.20 (m, 3H), 7.11 (d,  $J$  = 8.5 Hz, 2H), 6.99 (dd,  $J$  = 8.0 Hz,  $J$  = 7.5 Hz, 1H), 6.73 (d,  $J$  = 8.5 Hz, 1H), 6.41 (d,  $J$  = 9.0 Hz, 1H), 1.22 (s, 9H).  $^{19}\text{F}$  NMR (375 MHz, acetonitrile- $d_3$ , 23 °C,  $\delta$ ): -152.0 (s), -276.4 (br s).

### 7-Nitrobenzoquinolinyl-4-methylpyridylsulfonanilido palladium(IV) complex (S64)

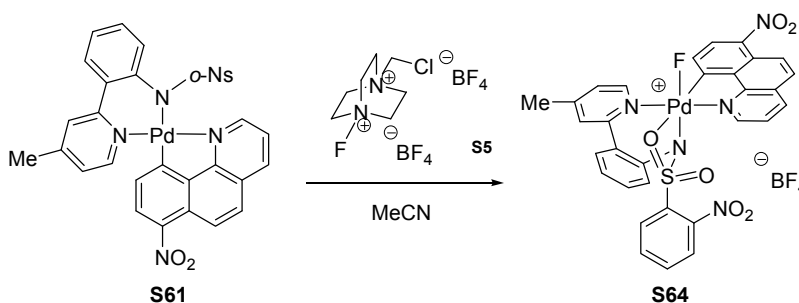

Solution (33.3 mM) of compound **S64** was prepared by reacting compound **S61** (14.0 mg, 0.0200 mmol, 1.00 equiv) with 1-chloromethyl-4-fluoro-1,4-diazoniabicyclo [2.2.2]octane bis(tetrafluoroborate) (**S5**) (7.1 mg, 0.020 mmol, 1.0 equiv) in NMR tubes under nitrogen. Compound **S64** was characterized by NMR spectroscopy in acetonitrile solution without purification.

NMR Spectroscopy:  $^1\text{H}$  NMR (500 MHz, acetonitrile- $d_3$ , 25 °C,  $\delta$ ): 9.68 (d,  $J = 6.0$  Hz, 1H), 9.25 (d,  $J = 6.0$  Hz, 1H), 8.98 (d,  $J = 7.0$  Hz, 1H), 8.66 (d,  $J = 9.0$  Hz, 1H), 8.32 (d,  $J = 9.0$  Hz, 1H), 8.26 (s, 1H), 8.14 (dd,  $J = 8.0$  Hz,  $J = 6.0$  Hz, 1H), 7.81–7.75 (m, 3H), 7.60 (dd,  $J = 7.5$  Hz,  $J = 7.5$  Hz, 1H), 7.54 (d,  $J = 8.5$  Hz, 1H), 7.43 (d,  $J = 7.0$  Hz, 1H), 7.39 (dd,  $J = 7.5$  Hz,  $J = 7.5$  Hz, 1H), 7.19 (dd,  $J = 7.5$  Hz,  $J = 7.5$  Hz, 1H), 6.85 (dd,  $J = 8.0$  Hz,  $J = 7.5$  Hz, 1H), 6.68 (d,  $J = 8.0$  Hz, 1H), 6.46 (d,  $J = 9.0$  Hz, 1H), 2.73 (s, 3H).  $^{19}\text{F}$  NMR (375 MHz, acetonitrile- $d_3$ , 23 °C,  $\delta$ ): -152.0 (s), -278.1 (br s).

### Kinetic experiments of C–F reductive elimination from Pd(IV) complexes with mixed ligands

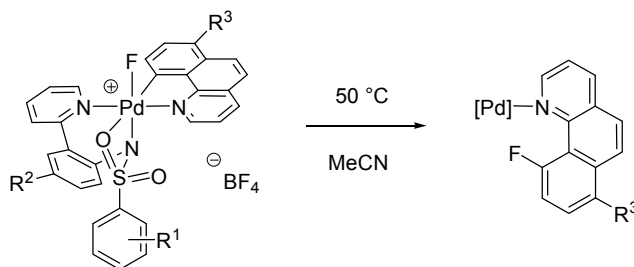

Solutions (16.7 mM) of compound **S62–S64** were prepared by reacting compound **S59–S61** (0.010 mmol, 1.0 equiv) with 1-chloromethyl-4-fluoro-1,4-diazoniabicyclo [2.2.2]octane bis(tetrafluoroborate) (**S5**) (3.5 mg, 0.010 mmol, 1.0 equiv) in NMR tubes under nitrogen. NMR samples were placed in the preheated NMR machine (50 °C) and the disappearance of the compounds **S62–S64** and formation of the product were monitored by integrating the peak at around 6.3 ppm and 9.1 ppm, respectively, relative to the peak of 1-chloromethyl-1,4-diazoniabicyclo [2.2.2]octane (tetrafluoroborate) at 4.91 ppm.

**Kinetic data of S62**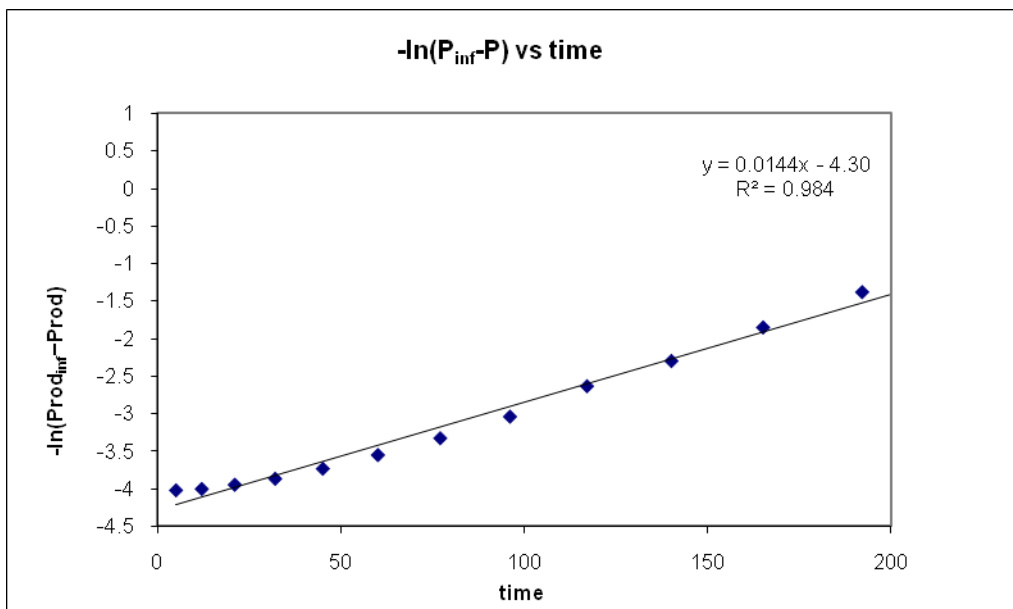**Kinetic data of S63**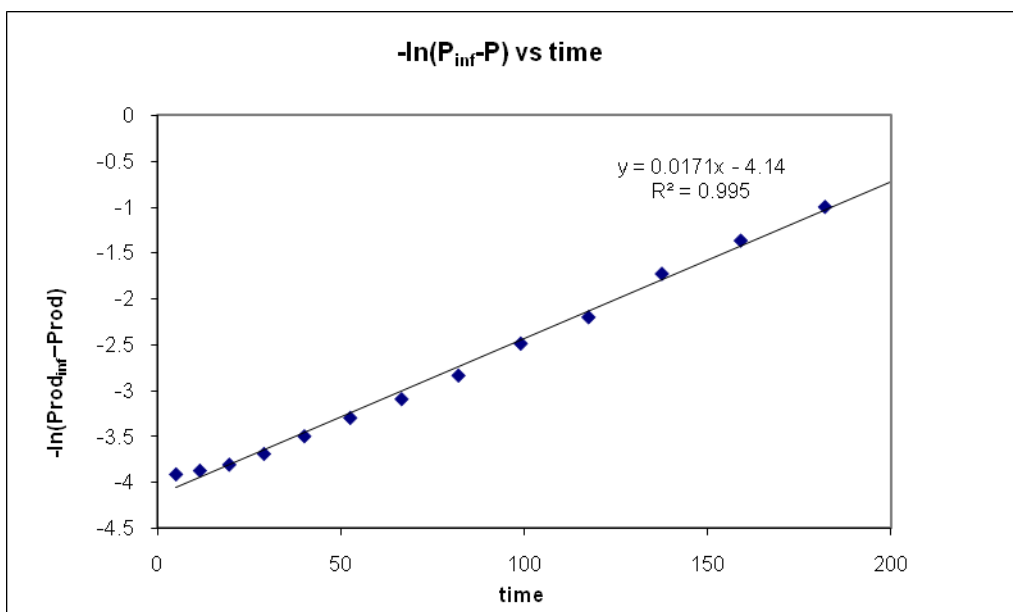

| Pd(IV) complex                     | <b>6f</b> | <b>S62</b> | <b>6h</b> | <b>S63</b> |
|------------------------------------|-----------|------------|-----------|------------|
| rate (s <sup>-1</sup> ) at 49.5 °C | 0.00536   | 0.0144     | 0.00611   | 0.0171     |
| relative rate at 49.5 °C           | 1.00      | 2.69       | 1.14      | 3.19       |

## Kinetic data of S64

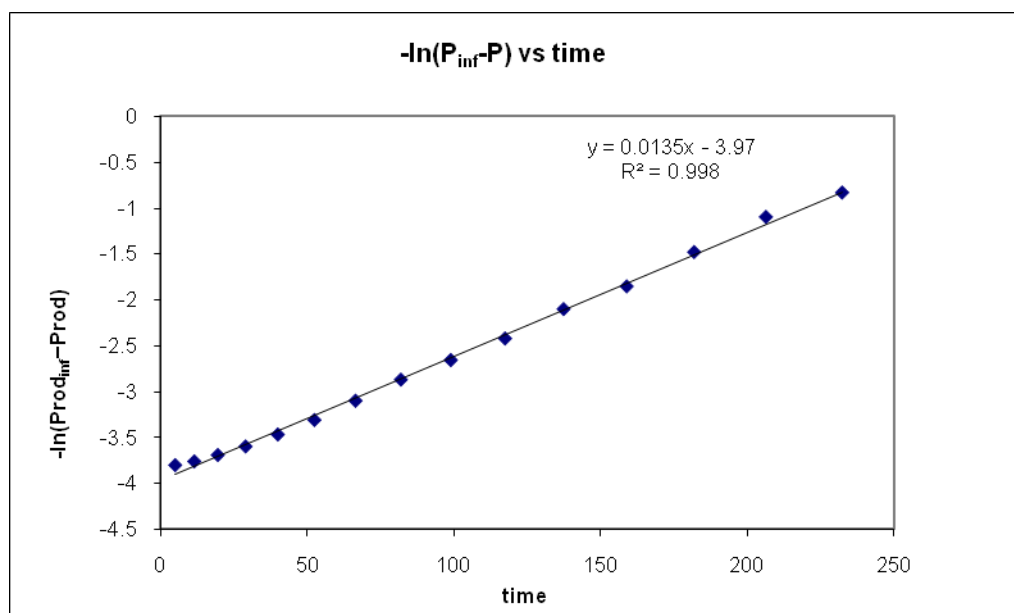

| Pd(IV) complex                     | <b>1</b> | <b>8a</b> | <b>7e</b> | <b>S62</b> |
|------------------------------------|----------|-----------|-----------|------------|
| rate (s <sup>-1</sup> ) at 49.5 °C | 0.00343  | 0.0115    | 0.00389   | 0.0135     |
| relative rate at 49.5 °C           | 1.00     | 3.35      | 1.13      | 3.94       |

## Dependence on pyridine concentration for 7-nitrobenzoquinolynyl Pd(IV) fluoride complex **9a**

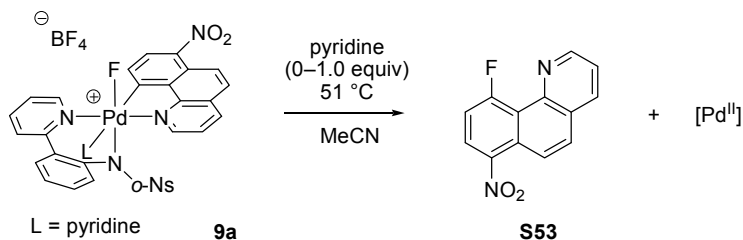

Solutions (33.3 mM) of compound **9a** were prepared by reacting compound **S47** (14 mg, 0.020 mmol, 1.0 equiv) with 1-chloromethyl-4-fluoro-1,4-diazoniabicyclo [2.2.2]octane bis(tetrafluoroborate) (**S5**) (7.1 mg, 0.020 mmol, 1.0 equiv) and pyridine (1.0–2.0 equiv) in NMR tubes under nitrogen. NMR samples were placed in a preheated NMR machine and the disappearance of compound **9a** was monitored by integrating the peak at 6.60 ppm relative to the peak of 1-chloromethyl-1,4-diazoniabicyclo [2.2.2]octane (tetrafluoroborate) at 4.91 ppm.

### Kinetic data with 0 equiv of pyridine

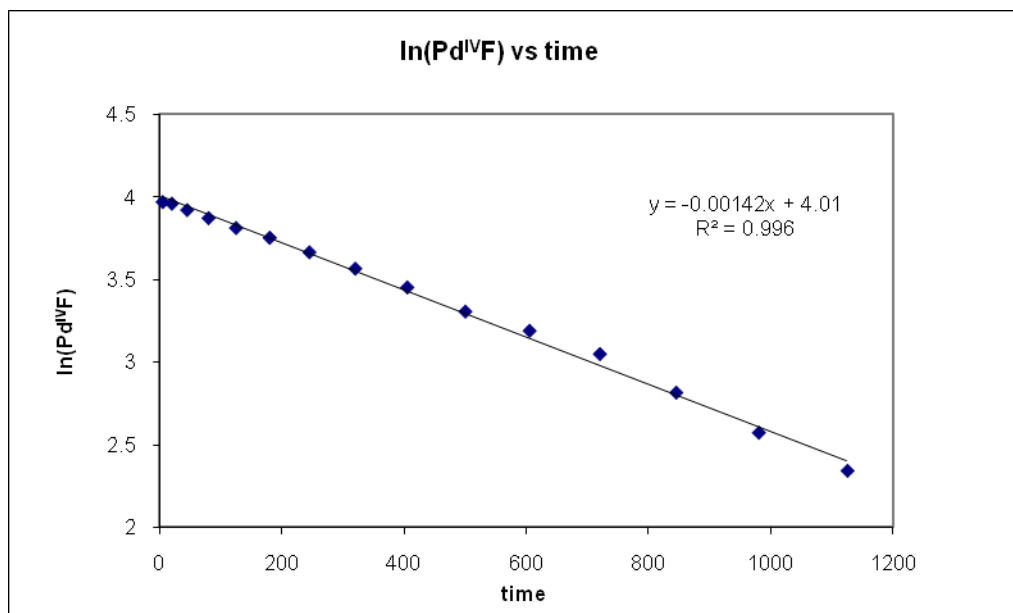



**Kinetic data with 0.25 equiv of pyridine**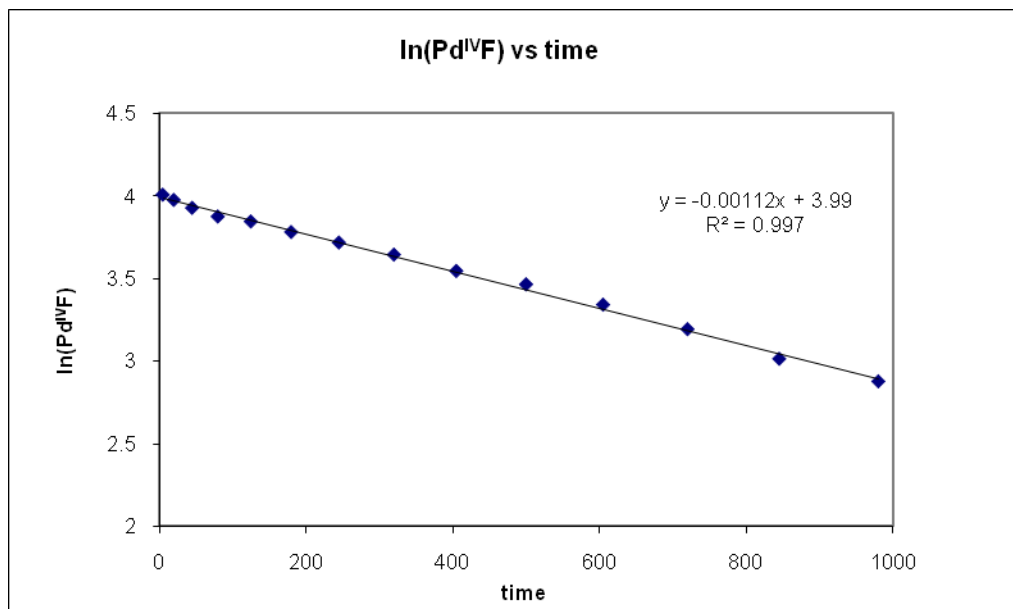**Kinetic data with 0.50 equiv of pyridine**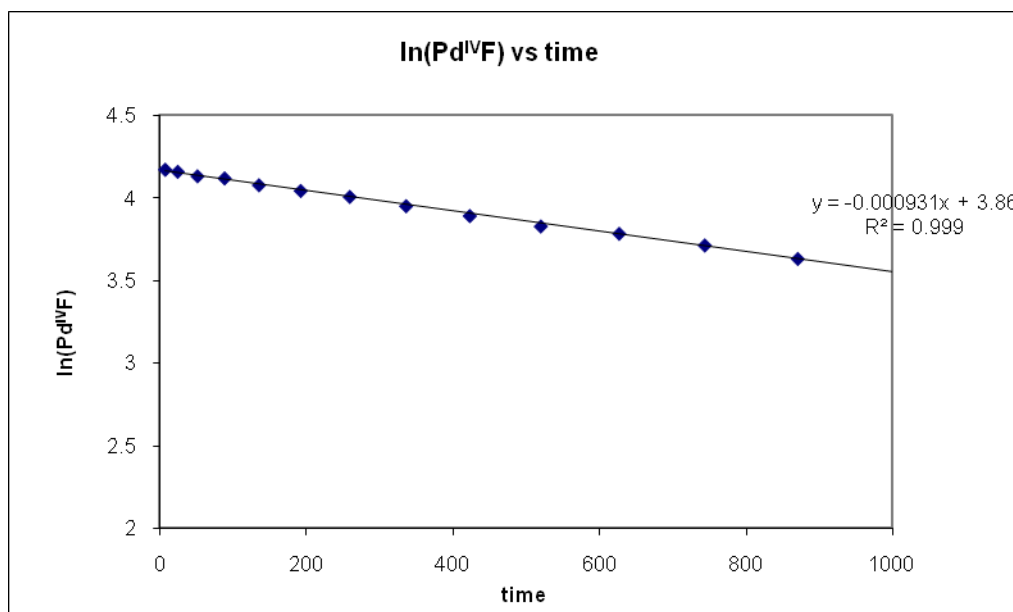

**Kinetic data with 0.75 equiv of pyridine**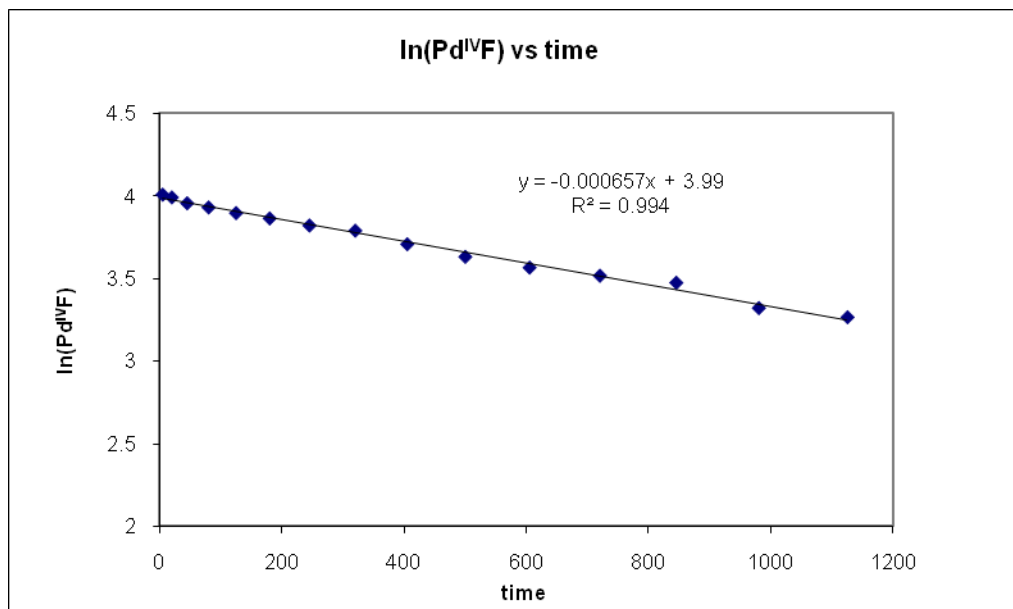**Kinetic data with 1.00 equiv of pyridine**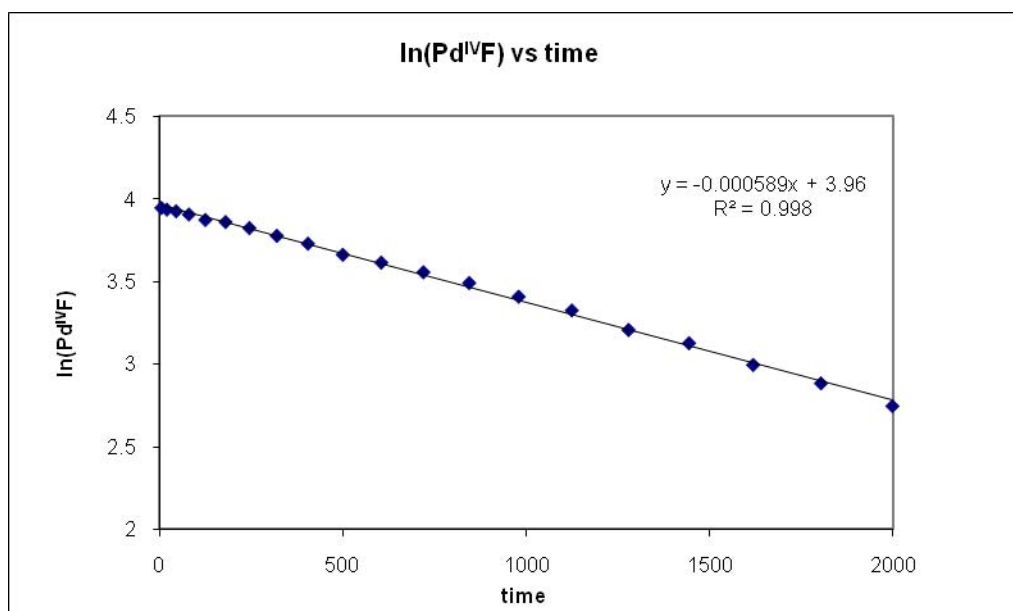

### Relationship of rate vs pyridine concentration

| py (equiv) | k (s <sup>-1</sup> ) | 1/k (s) |
|------------|----------------------|---------|
| 0          | 0.00142              | 704     |
| 0.25       | 0.00112              | 890     |
| 0.50       | 0.000931             | 1074    |
| 0.75       | 0.000657             | 1522    |
| 1.00       | 0.000589             | 1698    |

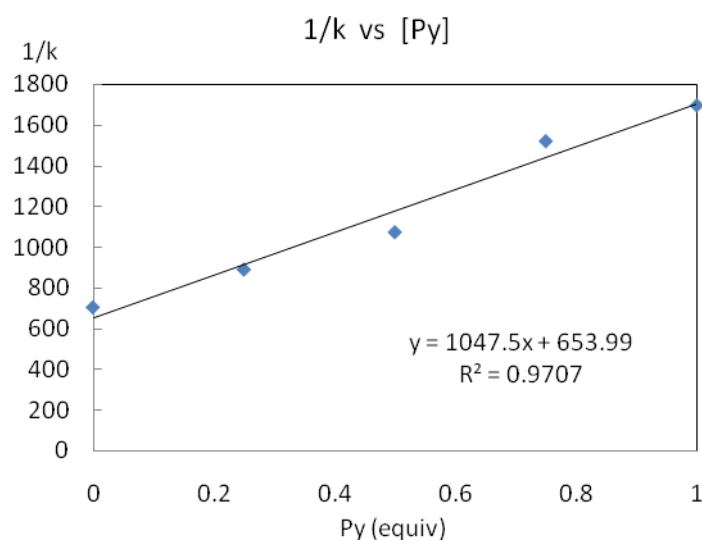

### Dependence on pyridine concentration for 7-methoxybenzoquinolinyl Pd(IV) fluoride complex **9g**

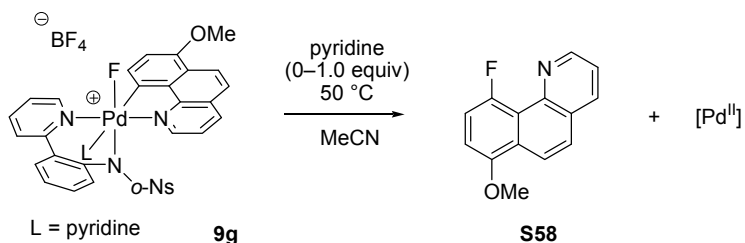

Solutions (33.3 mM) of compound **9g** were prepared by reacting compound **S52** (13 mg, 0.020 mmol, 1.0 equiv) with 1-chloromethyl-4-fluoro-1,4-diazoniabicyclo [2.2.2]octane bis(tetrafluoroborate) (**S5**) (7.1 mg, 0.020 mmol, 1.0 equiv) and pyridine (1.0–2.0 equiv) in NMR tubes under nitrogen. NMR samples were placed in a preheated NMR machine and the disappearance of compound **9g** was monitored by integrating

the peak at 6.30 ppm relative to the peak of 1-chloromethyl-1,4-diazoniabicyclo [2.2.2]octane (tetrafluoroborate) at 4.91 ppm.

### Kinetic data with 0 equiv of pyridine

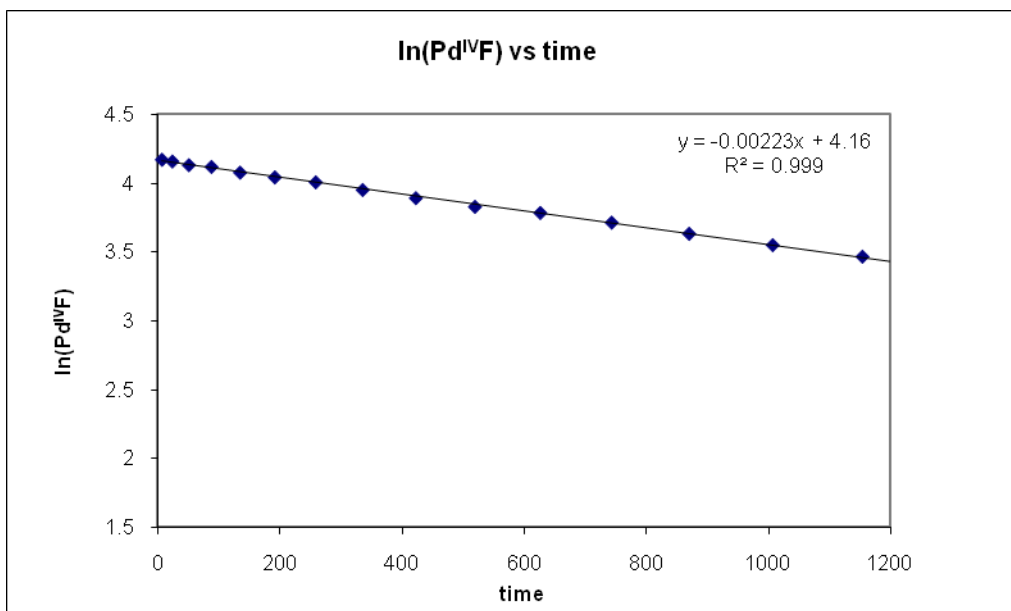

### Kinetic data with 0.25 equiv of pyridine

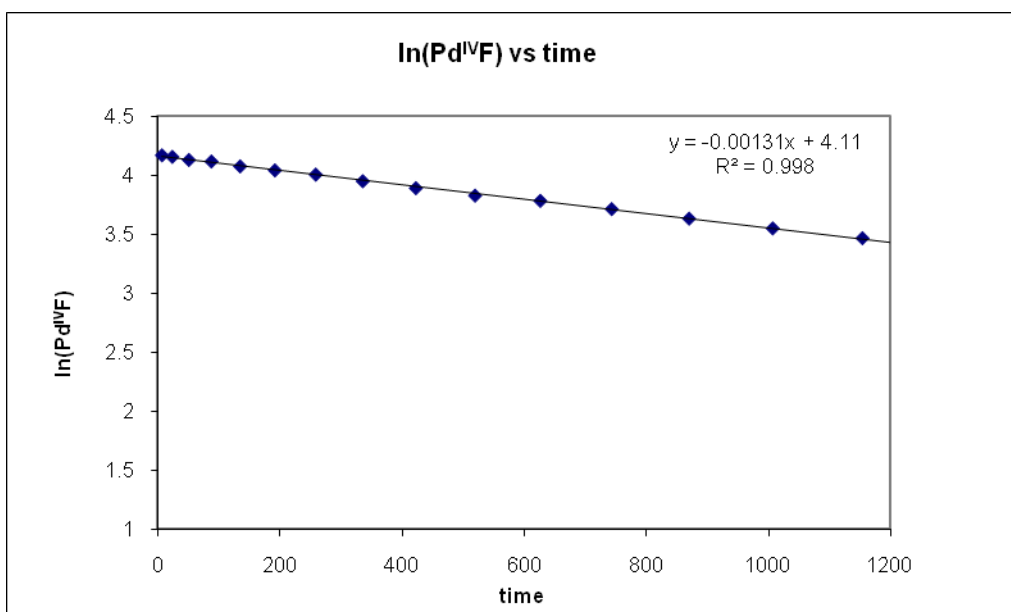

**Kinetic data with 0.50 equiv of pyridine**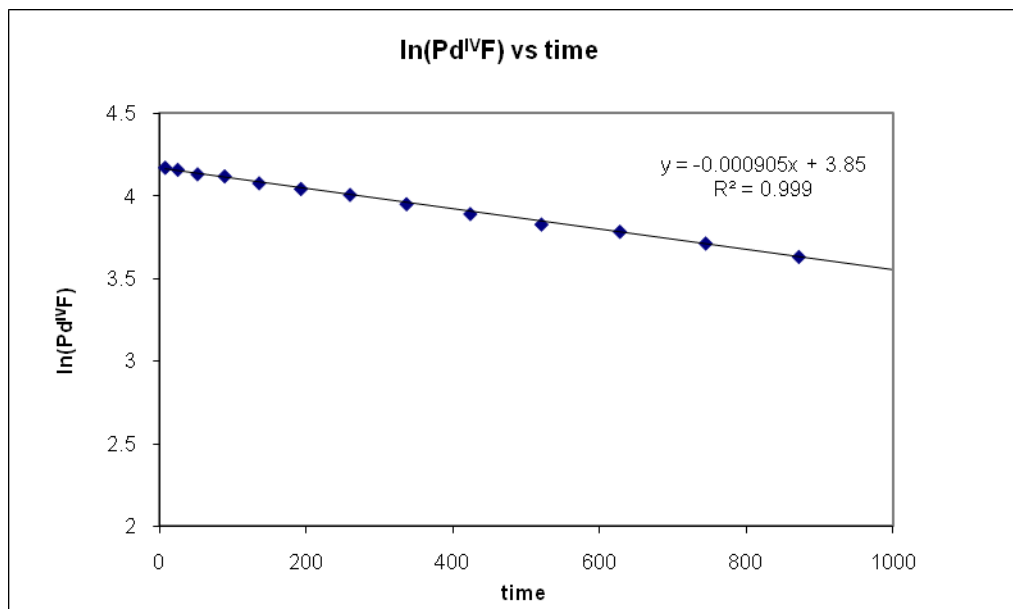**Kinetic data with 0.75 equiv of pyridine**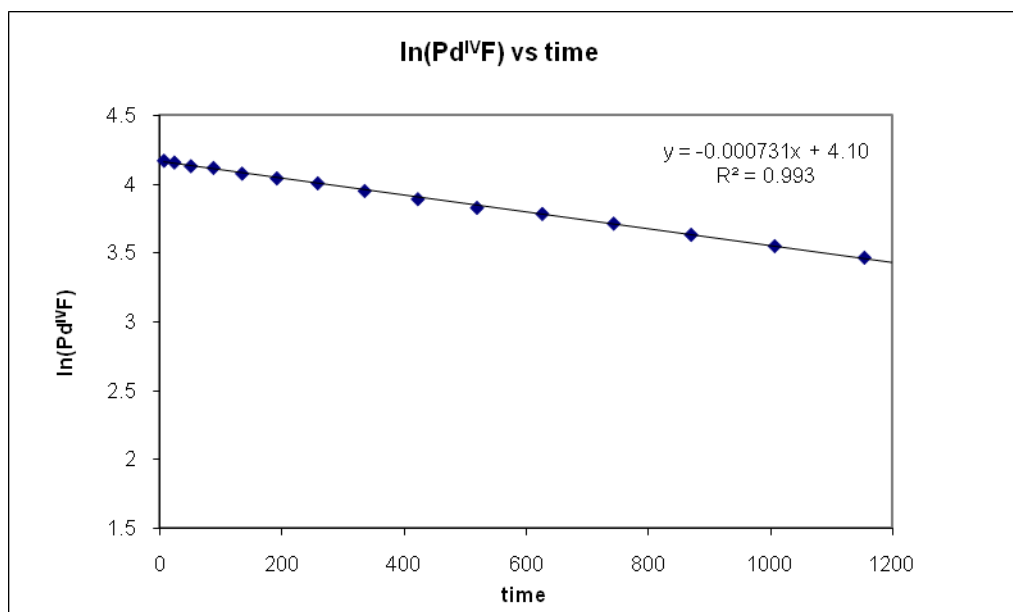

**Kinetic data with 1.00 equiv of pyridine**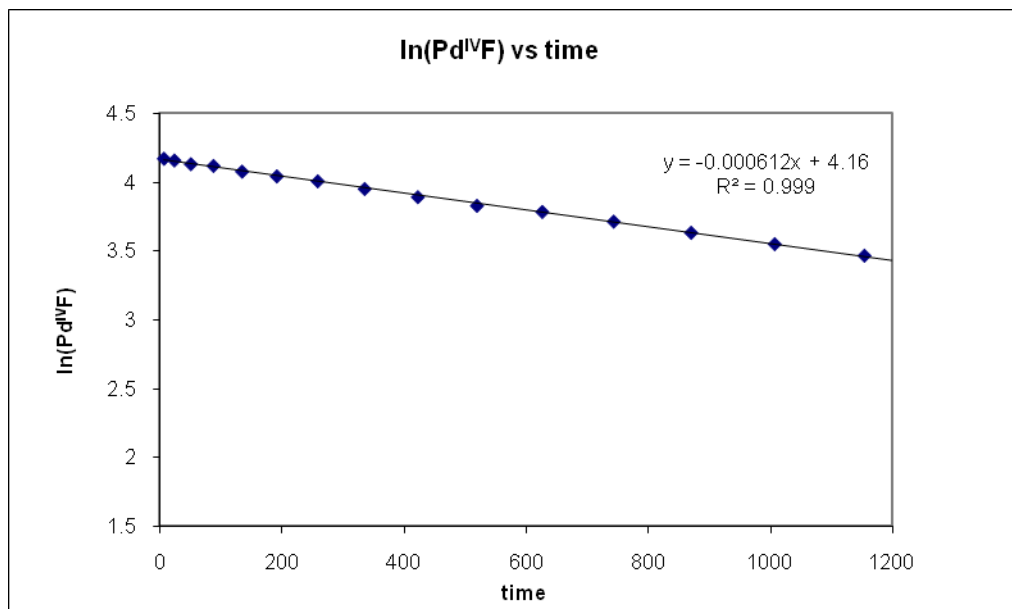**Relationship of rate vs pyridine concentration**

| py (equiv) | k (s <sup>-1</sup> ) | 1/k (s) |
|------------|----------------------|---------|
| 0          | 0.00232              | 431     |
| 0.25       | 0.00131              | 763     |
| 0.50       | 0.000905             | 1105    |
| 0.75       | 0.000731             | 1366    |
| 1.00       | 0.000612             | 1634    |

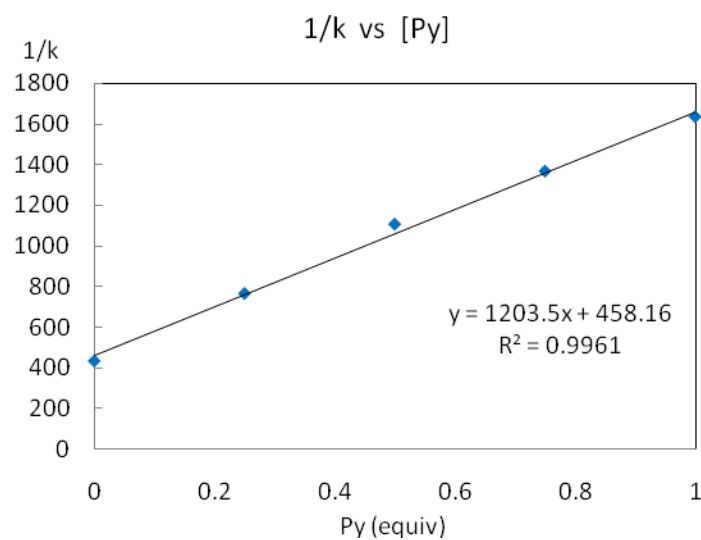

## Model of reductive elimination from **2**

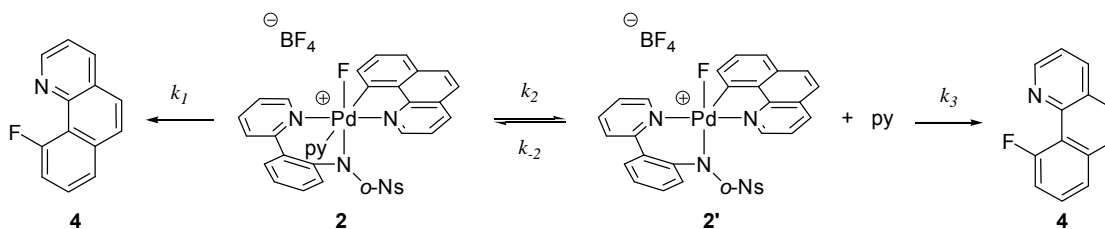

The rate law for reductive elimination from **2** via C–F bond formation with direct mechanism and from a pentacoordinate complex **2'** with pre-equilibrium pyridine dissociation is as follows:

$k_1$ : rate of C–F bond formation form hexacoordinate complex **2**

$k_2$ : rate of pyridine dissociation to form pentacoordinate complex **2'**

$k_{-2}$ : rate of pyridine association to form hexacoordinate complex **2**

$k_3$ : rate of C–F bond formation form hexacoordinate complex **2'**

Rate of the reaction is given in eq. 1,

$$\frac{d[P]}{dt} = k_1[2] + k_3[2'] \quad (1)$$

Based on the steady state approximation for **2'**

$$\begin{aligned} \frac{d[2']}{dt} = 0 \quad \therefore k_2[2] - k_{-2}[2'][py] - k_3[2'] &= 0 \\ \therefore [2'] &= \frac{k_2}{k_{-2}[py] + k_3}[2] \end{aligned} \quad (2)$$

From eq.1 and eq.2,

$$\begin{aligned} \frac{d[P]}{dt} &= k_1[2] + \frac{k_2 k_3}{k_{-2}[py] + k_3}[2] \\ &= \left\{ k_1 + \frac{k_2 k_3}{k_{-2}[py] + k_3} \right\} [2] \end{aligned}$$

Therefore, the rate expression is

$$\frac{d[P]}{dt} = k_{obs}[2]$$

$$\text{where } k_{obs} = k_1 + \frac{k_2 k_3}{k_{-2}[py] + k_3} \quad (3)$$

When  $k_1 \ll k_3$ , eq. 3 can be simplified to

$$k_{obs} = \frac{k_2 k_3}{k_{-2}[py] + k_3} \quad (4)$$

An alternative form of eq. 4 is eq. 5, which was used to fit the pyridine inhibition data

$$\frac{1}{k_{obs}} = \frac{1}{k_2} + \frac{k_{-2}[py]}{k_2 k_3} \quad (5)$$

### C–F Reductive elimination from difluoro Pd(IV) complex **3**

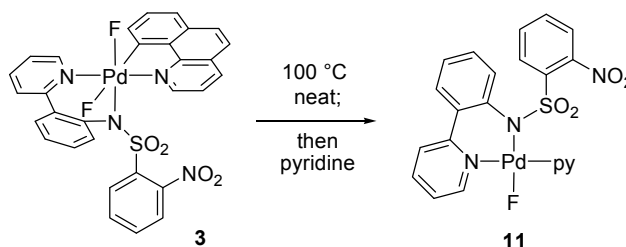

Difluoro palladium(IV) complex **3** (20.3 mg, 0.0300 mmol, 1.00 equiv) was heated at 100 °C for 6.0 hr without solvent. After cooling to 23 °C, 1.0 mL of MeCN containing pyridine (2.4  $\mu$ L, 0.030 mmol, 1.0 equiv) was added to the residue with vigorous stirring. The mixture was concentrated in vacuo and washed with Et<sub>2</sub>O (3  $\times$  1.0 mL). The remaining solid was dissolved in CH<sub>2</sub>Cl<sub>2</sub> and filtered through a pad of celite. The filtrate was concentrated in vacuo to afford 10 mg of the title compound as a yellow solid (60% yield).

NMR Spectroscopy: <sup>1</sup>H NMR (500 MHz, CDCl<sub>3</sub>, 23 °C,  $\delta$ ): 8.84–8.79 (m, 3H), 7.85 (dd,  $J$  = 7.5 Hz, 7.5 Hz, 1H), 7.67 (d,  $J$  = 7.5 Hz, 1H), 7.59 (ddd,  $J$  = 7.5 Hz, 7.5 Hz, 1.5 Hz, 1H), 7.56–7.52 (m, 2H), 7.48 (dd,  $J$  = 7.5 Hz, 1.5 Hz, 1H), 7.32 (dd,  $J$  = 7.0 Hz, 7.0 Hz, 2H), 7.38 (t,  $J$  = 7.0 Hz, 1H), 7.28 (d,  $J$  = 7.5 Hz, 1H), 7.21 (ddd,  $J$  = 7.5 Hz, 7.0 Hz, 1.0 Hz, 1H), 7.16–7.11 (m, 2H), 7.05 (d,  $J$  = 7.5 Hz, 1H). <sup>13</sup>C NMR (125 MHz, CDCl<sub>3</sub>, 23 °C,  $\delta$ ): 154.2, 151.0 (d,  $J$  = 13.8 Hz), 150.7 (d,  $J$  = 6.9 Hz), 147.1, 139.9, 138.8, 138.7, 136.2, 134.0, 131.7, 131.4, 130.4, 130.1, 129.9, 129.5, 126.2, 124.8, 122.9, 122.7, 122.4. <sup>19</sup>F NMR (375 MHz, CDCl<sub>3</sub>, 23 °C,  $\delta$ ): –323.3. Mass Spectrometry: HRMS-FIA ( $m/z$ ): Calcd for [C<sub>22</sub>H<sub>17</sub>FN<sub>4</sub>O<sub>4</sub>PdS + H], 557.9989 Found, 557.9977.



## Independent synthesis of monofluoro Pd(II) complex 11

### Iodo palladium(II) complex 12

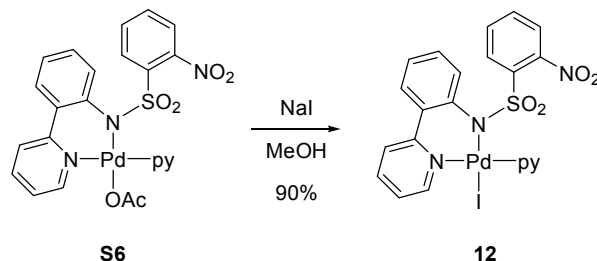

To acetato palladium complex **S6** (299 mg, 0.500 mmol, 1.00 equiv) in MeOH (5.0 mL) at 23 °C was added NaI (749 mg, 5.00 mmol, 10.0 equiv). After stirring for 2.0 hr at 23 °C, the reaction mixture was concentrated in vacuo. The residue was dissolved in CH<sub>2</sub>Cl<sub>2</sub> and filtered through a pad of celite. The filtrate was concentrated in vacuo to afford 300 mg of the title compound as a orange solid (90% yield).

NMR Spectroscopy: <sup>1</sup>H NMR (500 MHz, CDCl<sub>3</sub>, 23 °C, δ): 9.42 (dd, *J* = 6.0 Hz, 1.0 Hz, 1H), 7.45 (dd, *J* = 6.0 Hz, 1.5 Hz, 2H), 7.79 (dd, *J* = 7.5 Hz, 7.5 Hz, 1H), 7.61–7.50 (m, 3H), 7.79 (dd, *J* = 8.0 Hz, 1.5 Hz, 1H), 7.39–7.33 (m, 4H), 7.25–7.20 (m, 2H), 7.14–7.09 (m, 2H), 6.98 (ddd, *J* = 7.5 Hz, 7.5 Hz, 1.5 Hz, 1H). <sup>13</sup>C NMR (125 MHz, CDCl<sub>3</sub>, 23 °C, δ): 157.9, 155.6, 153.8, 146.9, 140.2, 138.7, 138.4, 136.8, 134.9, 131.8, 131.1, 130.3, 129.6, 129.4, 129.2, 125.2, 125.0, 123.7, 122.8, 122.6. Mass Spectrometry: HRMS-FIA (*m/z*): Calcd for [C<sub>22</sub>H<sub>17</sub>IN<sub>4</sub>O<sub>4</sub>PdS + H], 665.9050. Found, 665.9079.

### Fluoro palladium(II) complex 11

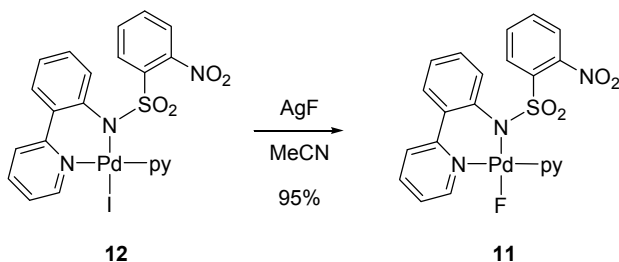

To iodo palladium complex **12** (200 mg, 0.300 mmol, 1.00 equiv) in MeCN (3.0 mL) at 23 °C was added AgF (76.1 mg, 0.600 mmol, 2.00 equiv). After stirring for 20 min at 23 °C, the reaction mixture was concentrated in vacuo. The residue was dissolved in CH<sub>2</sub>Cl<sub>2</sub> and filtered through a pad of celite. The filtrate was concentrated in vacuo to afford 159 mg of the title compound as a yellow solid (95% yield).

### Temperature and solvent dependency of C–F reductive elimination from **3**.

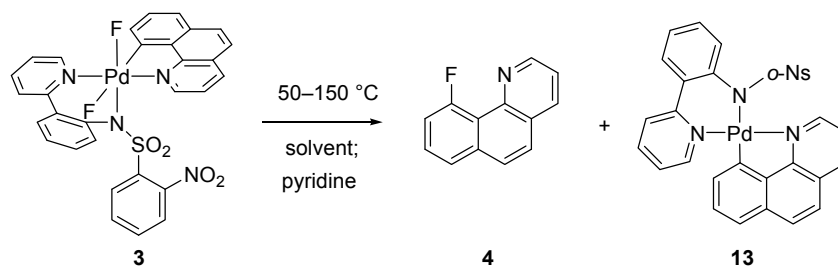

Difluoro palladium(IV) complex **3** (6.8 mg, 0.010 mmol, 1.0 equiv) was heated at 50–150 °C until complete conversion of the starting material. The yield of **4** and **13** was determined by  $^1\text{H}$  NMR and  $^{19}\text{F}$  NMR using 4-fluorotoluene as a standard. The results are summarized in the table below.

| entry | conditions         | <b>4</b> : <b>13</b> (% yield) |
|-------|--------------------|--------------------------------|
| 1     | pyridine, 50 °C    | <1:50                          |
| 2     | pyridine, 75 °C    | <1:57                          |
| 3     | pyridine, 100 °C   | <1:72                          |
| 4     | DMSO, 50 °C        | 38:60                          |
| 5     | DMSO, 75 °C        | 48:50                          |
| 6     | DMSO, 100 °C       | 66:32                          |
| 7     | DMSO, 150 °C       | 97:1                           |
| 8     | chloroform, 50 °C  | 54:44                          |
| 9     | chloroform, 75 °C  | 64:33                          |
| 10    | chloroform, 100 °C | 70:27                          |
| 11    | neat, 75 °C        | 95:<1                          |
| 12    | neat, 100 °C       | 97: <1                         |
| 13    | neat, 150 °C       | 98: <1                         |

### Kinetic experiments for C–F reductive elimination from **3**

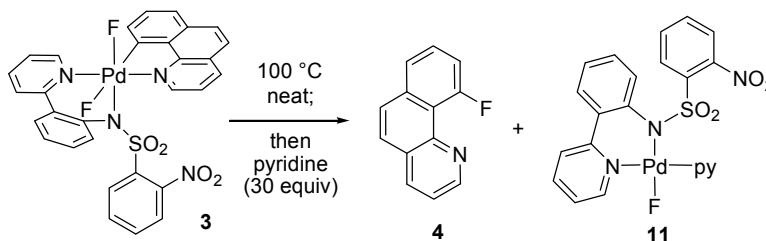

Nine vials, which contain difluoro palladium(IV) complex **3** (3.4 mg, 0.0050 mmol, 1.0 equiv), were heated at 100 °C without solvent in the presence/absence of **4** (0.97 mg, 0.0050 mmol, 1.0 equiv). At each data point, one vial was taken and cooled to 23 °C using a dry ice/isopropanol bath. To each vial was added  $\text{CDCl}_3$  and pyridine- $d_5$  (12  $\mu\text{L}$ , 0.15 mol, 30 equiv) and the ratio of **3** and **4** was determined by

$^1\text{H NMR}$ .

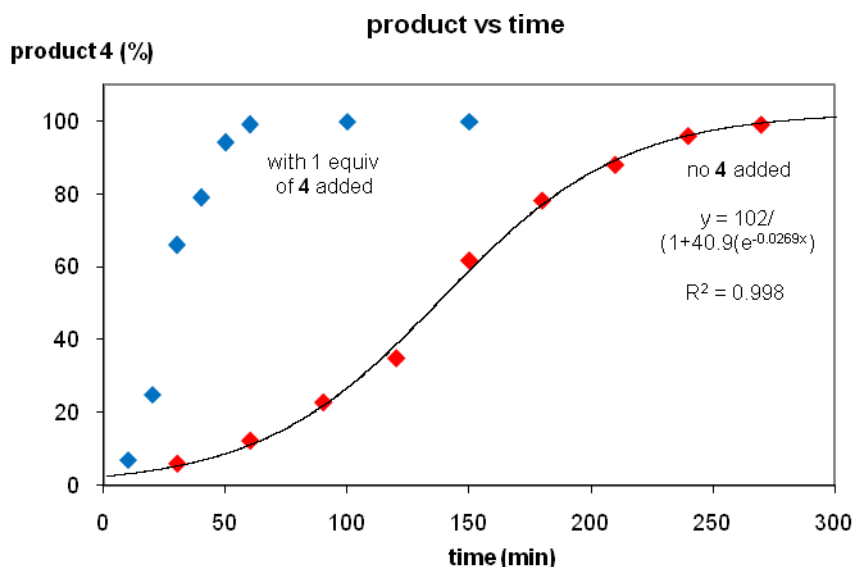

## Model of autocatalytic reactions

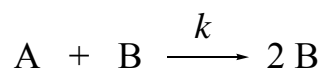

For an autocatalytic model reaction shown above, write  $[\text{A}] = [\text{A}]_0 - x$ ,  $[\text{B}] = [\text{B}]_0 + x$ , when the rate law becomes

$$\frac{dx}{dt} = k([\text{A}]_0 - x)([\text{B}]_0 + x)$$

Integration by partial fractions using

$$\frac{1}{([\text{A}]_0 - x)([\text{B}]_0 + x)} = \frac{1}{[\text{A}]_0 + [\text{B}]_0} \left\{ \frac{1}{[\text{A}]_0 - x} + \frac{1}{[\text{B}]_0 + x} \right\}$$

gives

$$\frac{1}{[\text{A}]_0 + [\text{B}]_0} \ln \left\{ \frac{[\text{A}]_0([\text{B}]_0 + x)}{[\text{B}]_0([\text{A}]_0 - x)} \right\} = kt$$

hence

$$x = \frac{[B]_0 (e^{at} - 1)}{1 + b e^{at}} \quad a = k([A]_0 + [B]_0), \quad b = \frac{[B]_0}{[A]_0}$$

$$\therefore [B] = [B]_0 + x = \frac{[A]_0 + [B]_0}{1 + \frac{[A]_0}{[B]_0} e^{-([A]_0 + [B]_0)kt}}$$

For the C–F reductive elimination from **3** (= A) with no **4** (= B) added as shown in red, the data were fitted to  $[A]_0 + [B]_0 = 102$ ,  $[A]_0/[B]_0 = 40.9$ ,  $k([A]_0 + [B]_0) = 0.0269$ .

### Analysis of typical Pd–N (pyridine) bond lengths

Typical Pd–N (pyridine) bond lengths were determined by calculating 95% confidence interval for 1454 samples obtained from Cambridge Crystallographic Database Center. Distribution is shown below.

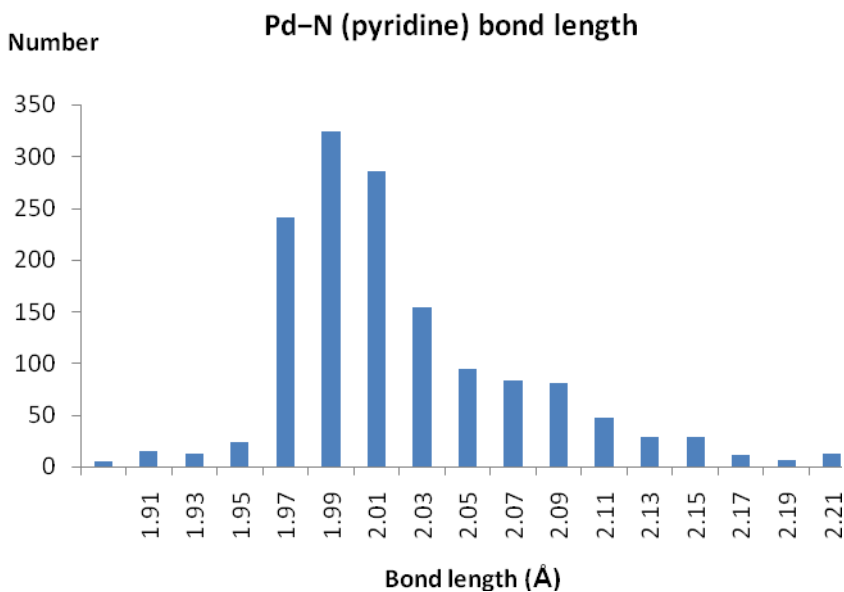

## X-ray Crystallographic Analysis

### Difluoro Pd(IV) complex 3 (CCDC 686490)

#### Experimental

The compound was crystallized from an acetonitrile solution as orange prisms. A crystal 0.025 mm x 0.050 mm x 0.075 mm in size was selected, mounted on a nylon loop with Paratone-N oil, and transferred to a Bruker SMART APEX II diffractometer equipped with an Oxford Cryosystems 700 Series Cryostream Cooler and Mo K $\alpha$  radiation ( $\lambda = 0.71073 \text{ \AA}$ ). A total of 2147 frames were collected at 193 (2) K to  $\theta_{\text{max}} = 22.49^\circ$  with an oscillation range of  $0.5^\circ/\text{frame}$ , and an exposure time of 15 s/frame using the APEX2 suite of software. (Bruker AXS, 2006a) Data were collected to  $\theta_{\text{max}} = 22.49^\circ$  rather than the routine value of  $\theta_{\text{max}} = 27.50^\circ$  because the crystal examined did not exhibit usable diffraction beyond  $22.49^\circ$ . Unit cell refinement on all observed reflections, and data reduction with corrections for Lp and decay were performed using SAINT. (Bruker AXS, 2006b) Scaling and a multi-scan absorption correction were done using SADABS. (Bruker AXS, 2004) The minimum and maximum transmission factors were 0.9421 and 0.9802, respectively. A total of 34170 reflections were collected, 3643 were unique ( $R_{\text{int}} = 0.147$ ), and 2584 had  $I > 2\sigma(I)$ . Systematic absences were consistent with the compound having crystallized in the monoclinic space group  $P2_1/n$ . The observed mean  $|E^2-1|$  value was 0.912 (versus the expectation values of 0.968 and 0.736 for centric and noncentric data, respectively).

The structure was solved by direct methods and refined by full-matrix least-squares on  $F^2$  using SHELXTL. (Bruker AXS, 2001) The asymmetric unit was found to contain one molecule of (Benzo[*h*]quinolinato){(2-nitrophenyl-sulfonyl)[(2-(pyridin-2-yl)phenyl)amido]difluoropalladium(IV) and one molecule of acetonitrile. All of the nonhydrogen atoms were refined with anisotropic displacement coefficients. The hydrogen atoms were assigned isotropic displacement coefficients  $U(\text{H}) = 1.2U(\text{C})$  or  $1.5U(\text{C}_{\text{methyl}})$ , and their coordinates were allowed to ride on their respective carbons. The acetonitrile was treated with a two-site disorder model consisting of partial atoms with fixed site occupancy factors of a half. The atoms associated with one of the two sites were specified with an asterisk, e.g. N1S and N1S\*, and included in the least-squares refinement with 1,2-distance, rigid-bond and similar  $U_{ij}$  restraints. The refinement converged to  $R(F) = 0.0383$ ,  $wR(F^2) = 0.0703$ , and  $S = 1.042$  for 2584 reflections with  $I > 2\sigma(I)$ , and  $R(F) = 0.0728$ ,  $wR(F^2) = 0.0829$ , and  $S = 1.042$  for 3643 unique reflections, 424 parameters, and 58 restraints. The maximum  $|\Delta/\sigma|$  in the final cycle of least-squares was 0.001, and the residual peaks on the final difference-Fourier map ranged from -0.505 to  $0.392 \text{ e\AA}^{-3}$ . Scattering factors were taken from the International Tables for Crystallography, Volume C. (Maslen et al., 1992, and Creagh & McAuley, 1992)

**References**

- Bruker AXS (2001). *SHELXTL v6.12*. Bruker Analytical X-ray Systems Inc., Madison, Wisconsin, USA.
- Bruker AXS (2004). *SADABS*. Bruker Analytical X-ray Systems Inc., Madison, Wisconsin, USA.
- Bruker AXS (2006a). *APEX2 v2.1-0*. Bruker Analytical X-ray Systems Inc., Madison, Wisconsin, USA.
- Bruker AXS (2006b). *SAINT V7.34A*. Bruker Analytical X-ray Systems Inc., Madison, Wisconsin, USA.
- Creagh, D. C. & McAuley, W. J. (1992). *International Tables for Crystallography: Mathematical, Physical and Chemical Tables*, Vol C, edited by A. J. C. Wilson, pp. 206-222. Dordrecht, The Netherlands: Kluwer.
- Maslen, E. N., Fox, A. G. & O'Keefe, M. A. (1992). *International Tables for Crystallography: Mathematical, Physical and Chemical Tables*, Vol C, edited by A. J. C. Wilson, pp. 476-516. Dordrecht, The Netherlands: Kluwer.

$R(F) = R1 = \sum ||F_o| - |F_c|| / \sum |F_o|$ ,  $wR(F^2) = wR2 = [ \sum w (F_o^2 - F_c^2)^2 / \sum w (F_o^2)^2 ]^{1/2}$ , and  $S = \text{Goodness-of-fit on } F^2 = [ \sum w (F_o^2 - F_c^2)^2 / (n-p) ]^{1/2}$ , where  $n$  is the number of reflections and  $p$  is the number of parameters refined.

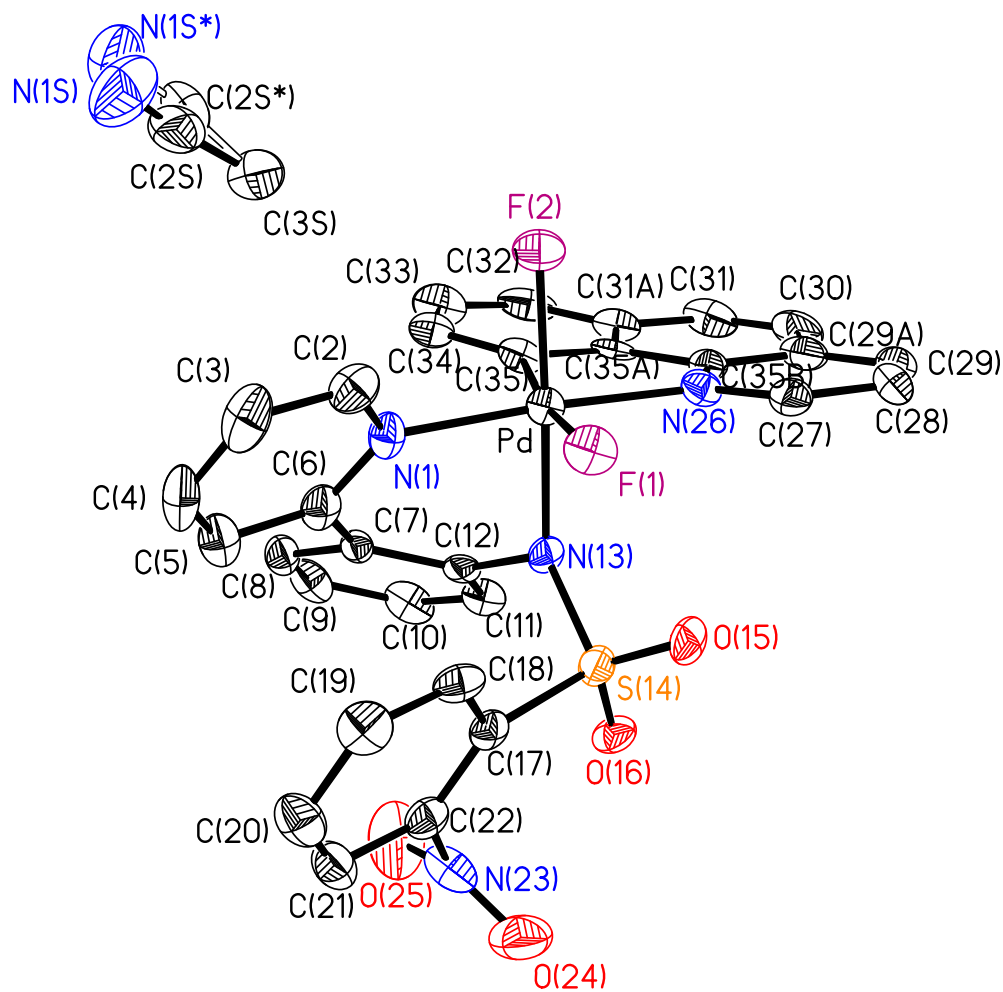

The structure of the difluoro palladium(IV) complex **3** without hydrogens.

The nonhydrogen atoms are depicted with 50% probability ellipsoids.

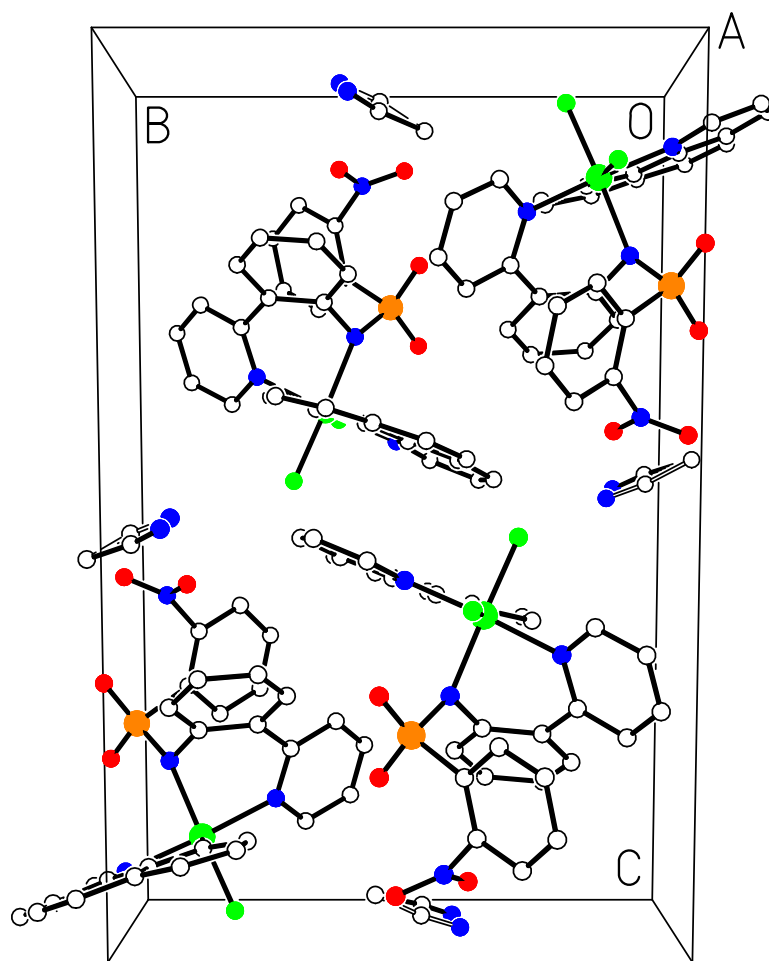

A unit cell diagram for the difluoro palladium(IV) complex **3** viewed down the crystallographic *a*-axis. Hydrogen atoms have been removed for clarity.



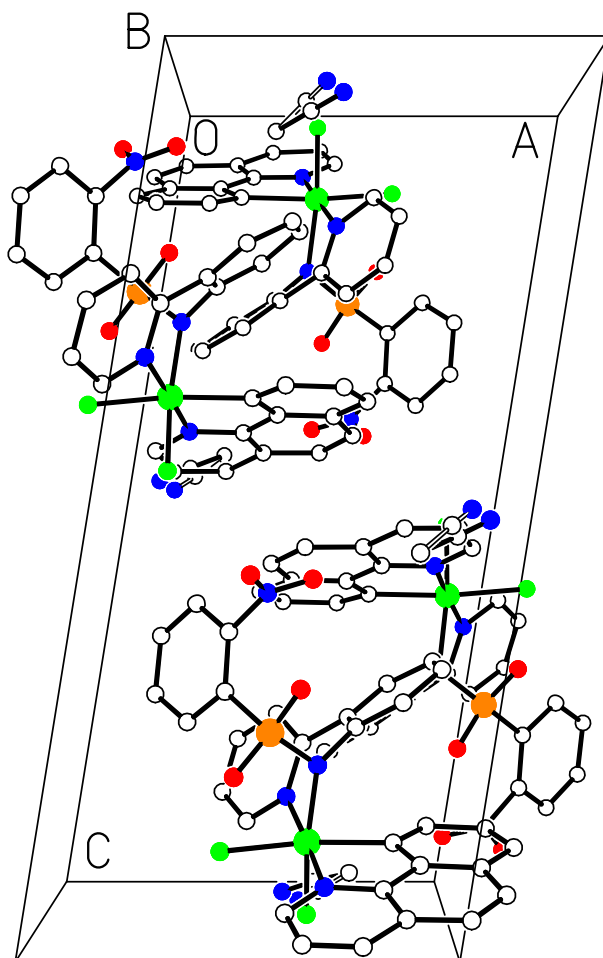

A unit cell diagram for the difluoro palladium(IV) complex **3** viewed down the crystallographic *b*-axis. Hydrogen atoms have been removed for clarity.

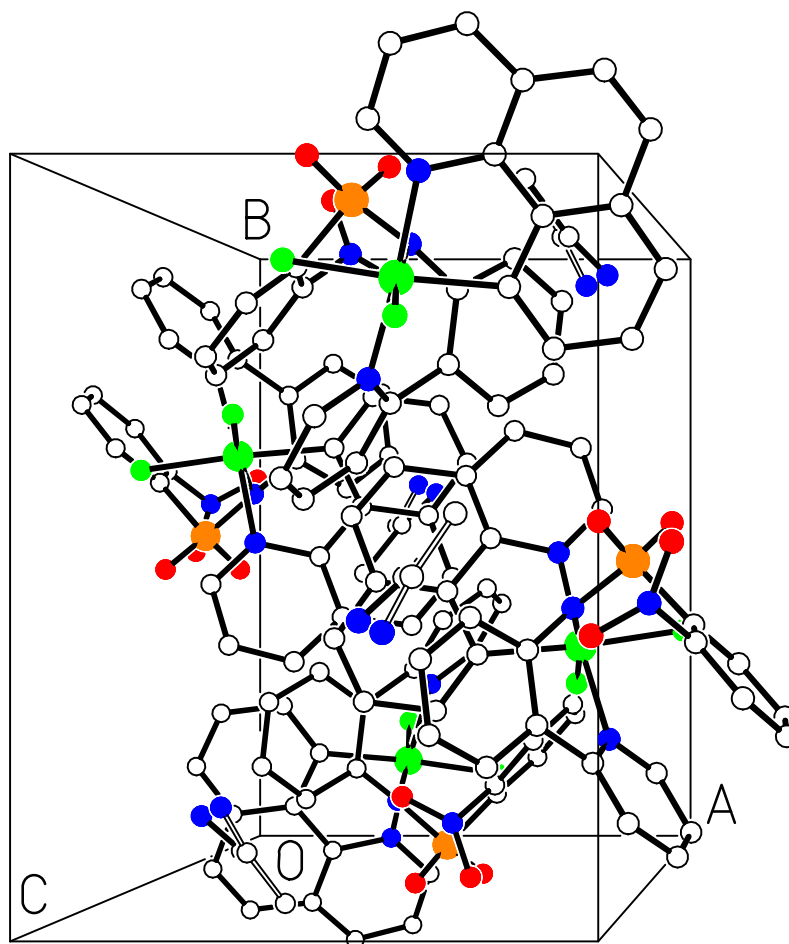

A unit cell diagram for the difluoro palladium(IV) complex **3** viewed down the crystallographic *c*-axis. Hydrogen atoms have been removed for clarity.

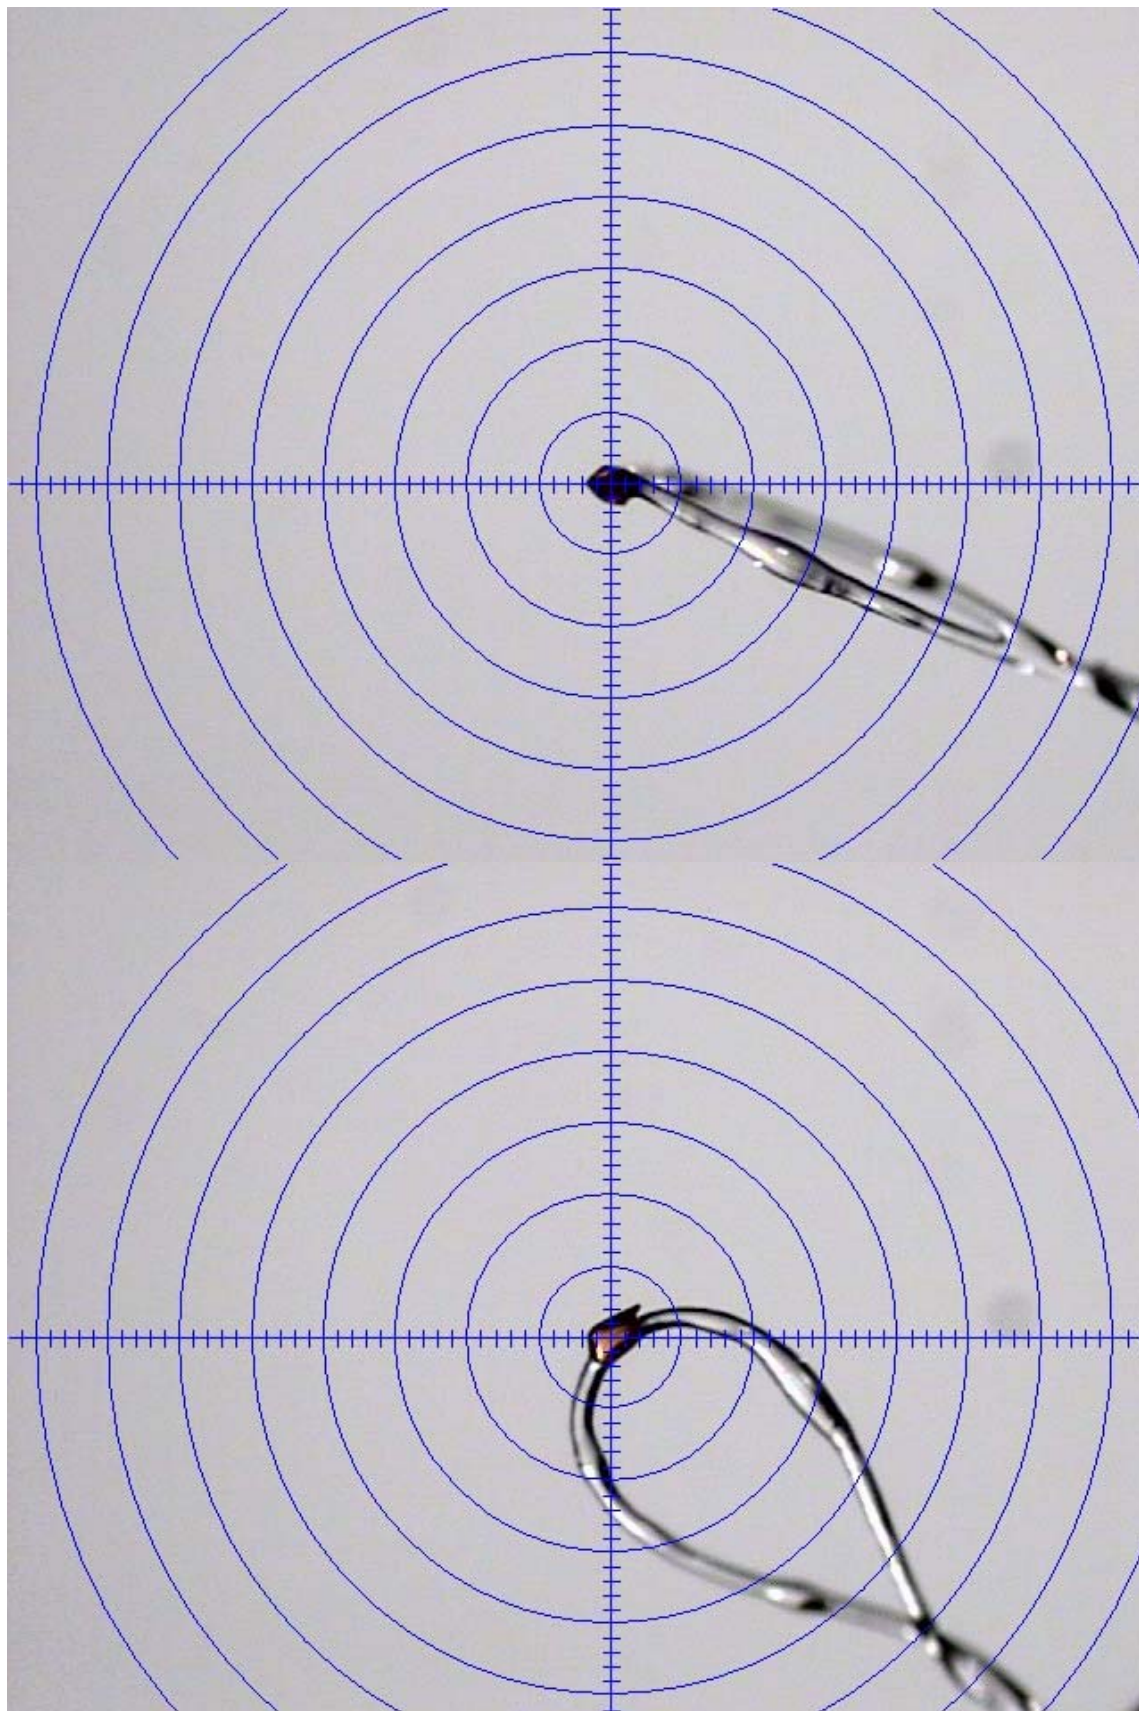

Table 1. Crystal data and structure refinement for the difluoro palladium(IV) complex **3**.

---

|                                   |                                                                                   |                  |
|-----------------------------------|-----------------------------------------------------------------------------------|------------------|
| Identification code               | difluoro palladium(IV) complex <b>3</b> (CCDC 686490)                             |                  |
| Empirical formula                 | C <sub>32</sub> H <sub>23</sub> F <sub>2</sub> N <sub>5</sub> O <sub>4</sub> Pd S |                  |
| Formula weight                    | 718.01                                                                            |                  |
| Temperature                       | 193(2) K                                                                          |                  |
| Wavelength                        | 0.71073 Å                                                                         |                  |
| Crystal system                    | Monoclinic                                                                        |                  |
| Space group                       | P 21/n                                                                            |                  |
| Unit cell dimensions              | a = 10.0089(3) Å                                                                  | α = 90°.         |
|                                   | b = 13.3937(4) Å                                                                  | β = 99.197(3) °. |
|                                   | c = 21.0503(7) Å                                                                  | γ = 90°.         |
| Volume                            | 2785.65(15) Å <sup>3</sup>                                                        |                  |
| Z                                 | 4                                                                                 |                  |
| Density (calculated)              | 1.712 Mg/m <sup>3</sup>                                                           |                  |
| Absorption coefficient            | 0.805 mm <sup>-1</sup>                                                            |                  |
| F(000)                            | 1448                                                                              |                  |
| Crystal size                      | 0.075 x 0.050 x 0.025 mm <sup>3</sup>                                             |                  |
| Theta range for data collection   | 1.81 to 22.49°.                                                                   |                  |
| Index ranges                      | -10 ≤ h ≤ 10, -14 ≤ k ≤ 14, -22 ≤ l ≤ 22                                          |                  |
| Reflections collected             | 34170                                                                             |                  |
| Independent reflections           | 3643 [R(int) = 0.1469]                                                            |                  |
| Completeness to theta = 22.49°    | 100.0 %                                                                           |                  |
| Absorption correction             | Semi-empirical from equivalents                                                   |                  |
| Max. and min. transmission        | 0.9802 and 0.9421                                                                 |                  |
| Refinement method                 | Full-matrix least-squares on F <sup>2</sup>                                       |                  |
| Data / restraints / parameters    | 3643 / 58 / 424                                                                   |                  |
| Goodness-of-fit on F <sup>2</sup> | 1.042                                                                             |                  |
| Final R indices [I > 2σ(I)]       | R1 = 0.0383, wR2 = 0.0703                                                         |                  |

---

R indices (all data)

$R1 = 0.0728$ ,  $wR2 = 0.0829$

Largest diff. peak and hole

0.392 and -0.505 e. Å<sup>-3</sup>

---

Table 2. Atomic coordinates ( $\times 10^4$ ) and equivalent isotropic displacement parameters ( $\text{\AA}^2 \times 10^3$ ) for the difluoro palladium(IV) complex **3**.  $U(\text{eq})$  is defined as one third of the trace of the orthogonalized  $U_{ij}$  tensor.

|       | x       | y       | z       | $U(\text{eq})$ |
|-------|---------|---------|---------|----------------|
| Pd    | 3838(1) | 1424(1) | 1183(1) | 22(1)          |
| F(1)  | 5817(3) | 1199(2) | 1097(1) | 32(1)          |
| F(2)  | 3569(3) | 2017(2) | 324(1)  | 34(1)          |
| N(1)  | 4481(4) | 2737(3) | 1604(2) | 26(1)          |
| C(2)  | 5333(6) | 3254(4) | 1286(3) | 33(2)          |
| C(3)  | 6042(6) | 4070(5) | 1567(4) | 41(2)          |
| C(4)  | 5884(6) | 4335(5) | 2178(3) | 41(2)          |
| C(5)  | 5021(6) | 3826(4) | 2496(3) | 33(2)          |
| C(6)  | 4298(5) | 3020(4) | 2202(3) | 27(2)          |
| C(7)  | 3327(5) | 2461(4) | 2521(2) | 20(1)          |
| C(8)  | 2497(5) | 3008(4) | 2879(3) | 27(2)          |
| C(9)  | 1528(6) | 2546(5) | 3150(3) | 33(2)          |
| C(10) | 1354(6) | 1517(5) | 3100(3) | 35(2)          |
| C(11) | 2160(5) | 960(5)  | 2757(3) | 26(2)          |
| C(12) | 3140(5) | 1421(5) | 2464(2) | 21(1)          |
| N(13) | 3895(4) | 854(3)  | 2075(2) | 21(1)          |
| S(14) | 5103(1) | 186(1)  | 2466(1) | 25(1)          |
| O(15) | 5754(4) | -350(3) | 2017(2) | 31(1)          |
| O(16) | 4573(4) | -359(3) | 2957(2) | 29(1)          |
| C(17) | 6294(5) | 1061(4) | 2875(3) | 23(1)          |
| C(18) | 7074(5) | 1609(4) | 2510(3) | 26(2)          |
| C(19) | 7959(6) | 2328(5) | 2790(3) | 34(2)          |
| C(20) | 8057(6) | 2534(5) | 3443(3) | 36(2)          |
| C(21) | 7315(6) | 1998(5) | 3822(3) | 34(2)          |
| C(22) | 6435(5) | 1268(4) | 3528(3) | 27(2)          |

---

|        |          |          |         |       |
|--------|----------|----------|---------|-------|
| N(23)  | 5678(6)  | 732(5)   | 3970(2) | 39(1) |
| O(24)  | 6112(5)  | -78(4)   | 4178(2) | 54(1) |
| O(25)  | 4687(5)  | 1156(4)  | 4113(2) | 63(2) |
| N(26)  | 3319(4)  | 74(3)    | 802(2)  | 24(1) |
| C(27)  | 4128(6)  | -563(5)  | 580(3)  | 30(2) |
| C(28)  | 3656(6)  | -1483(5) | 337(3)  | 34(2) |
| C(29)  | 2333(7)  | -1735(5) | 339(3)  | 38(2) |
| C(29A) | 1433(6)  | -1060(5) | 560(3)  | 34(2) |
| C(30)  | 12(7)    | -1190(5) | 562(3)  | 41(2) |
| C(31)  | -753(7)  | -461(5)  | 763(3)  | 38(2) |
| C(31A) | -199(6)  | 495(5)   | 976(3)  | 32(2) |
| C(32)  | -953(6)  | 1317(6)  | 1133(3) | 39(2) |
| C(33)  | -330(6)  | 2224(6)  | 1277(3) | 40(2) |
| C(34)  | 1070(6)  | 2354(5)  | 1295(3) | 28(2) |
| C(35)  | 1834(5)  | 1549(5)  | 1167(2) | 25(1) |
| C(35A) | 1193(5)  | 636(5)   | 991(2)  | 23(1) |
| C(35B) | 1984(6)  | -138(4)  | 791(3)  | 23(1) |
| N(1S)  | 4160(20) | 5940(20) | 230(20) | 65(8) |
| C(2S)  | 3430(50) | 5390(30) | 400(30) | 47(8) |
| C(3S)  | 2607(7)  | 4559(5)  | 577(3)  | 52(2) |
| N(1S*) | 3720(20) | 6080(20) | 110(20) | 55(7) |
| C(2S*) | 3270(60) | 5370(30) | 290(30) | 48(8) |

---

Table 3. Bond lengths [ $\text{\AA}$ ] and angles [ $^\circ$ ] for the difluoro palladium(IV) complex **3**.

|             |          |               |          |
|-------------|----------|---------------|----------|
| Pd-F(2)     | 1.955(3) | N(13)-S(14)   | 1.619(4) |
| Pd-C(35)    | 2.008(5) | S(14)-O(15)   | 1.426(4) |
| Pd-N(26)    | 2.012(5) | S(14)-O(16)   | 1.435(4) |
| Pd-N(13)    | 2.019(4) | S(14)-C(17)   | 1.791(6) |
| Pd-N(1)     | 2.027(5) | C(17)-C(22)   | 1.386(8) |
| Pd-F(1)     | 2.040(3) | C(17)-C(18)   | 1.389(7) |
| N(1)-C(6)   | 1.354(7) | C(18)-C(19)   | 1.376(8) |
| N(1)-C(2)   | 1.355(7) | C(18)-H(18)   | 0.9500   |
| C(2)-C(3)   | 1.385(8) | C(19)-C(20)   | 1.389(8) |
| C(2)-H(2)   | 0.9500   | C(19)-H(19)   | 0.9500   |
| C(3)-C(4)   | 1.367(9) | C(20)-C(21)   | 1.376(8) |
| C(3)-H(3)   | 0.9500   | C(20)-H(20)   | 0.9500   |
| C(4)-C(5)   | 1.357(8) | C(21)-C(22)   | 1.393(8) |
| C(4)-H(4)   | 0.9500   | C(21)-H(21)   | 0.9500   |
| C(5)-C(6)   | 1.389(8) | C(22)-N(23)   | 1.477(7) |
| C(5)-H(5)   | 0.9500   | N(23)-O(25)   | 1.222(6) |
| C(6)-C(7)   | 1.471(8) | N(23)-O(24)   | 1.224(7) |
| C(7)-C(12)  | 1.408(8) | N(26)-C(27)   | 1.314(7) |
| C(7)-C(8)   | 1.412(7) | N(26)-C(35B)  | 1.363(7) |
| C(8)-C(9)   | 1.351(8) | C(27)-C(28)   | 1.388(8) |
| C(8)-H(8)   | 0.9500   | C(27)-H(27)   | 0.9500   |
| C(9)-C(10)  | 1.390(8) | C(28)-C(29)   | 1.367(8) |
| C(9)-H(9)   | 0.9500   | C(28)-H(28)   | 0.9500   |
| C(10)-C(11) | 1.383(8) | C(29)-C(29A)  | 1.408(8) |
| C(10)-H(10) | 0.9500   | C(29)-H(29)   | 0.9500   |
| C(11)-C(12) | 1.385(7) | C(29A)-C(35B) | 1.407(8) |
| C(11)-H(11) | 0.9500   | C(29A)-C(30)  | 1.433(8) |
| C(12)-N(13) | 1.421(7) | C(30)-C(31)   | 1.350(9) |



---

|                |            |                 |           |
|----------------|------------|-----------------|-----------|
| C(30)-H(30)    | 0.9500     | C(35A)-C(35B)   | 1.408(8)  |
| C(31)-C(31A)   | 1.438(8)   | N(1S)-C(2S)     | 1.139(10) |
| C(31)-H(31)    | 0.9500     | C(2S)-C(3S)     | 1.462(10) |
| C(31A)-C(35A)  | 1.401(8)   | C(3S)-C(2S*)    | 1.458(10) |
| C(31A)-C(32)   | 1.403(8)   | C(3S)-H(3SA)    | 0.9800    |
| C(32)-C(33)    | 1.378(9)   | C(3S)-H(3SB)    | 0.9800    |
| C(32)-H(32)    | 0.9500     | C(3S)-H(3SC)    | 0.9800    |
| C(33)-C(34)    | 1.406(8)   | C(3S)-H(3SD)    | 0.9800    |
| C(33)-H(33)    | 0.9500     | C(3S)-H(3SE)    | 0.9800    |
| C(34)-C(35)    | 1.374(8)   | C(3S)-H(3SF)    | 0.9800    |
| C(34)-H(34)    | 0.9500     | N(1S*)-C(2S*)   | 1.136(10) |
| C(35)-C(35A)   | 1.403(8)   |                 |           |
|                |            | C(2)-N(1)-Pd    | 114.1(4)  |
| F(2)-Pd-C(35)  | 87.81(18)  | N(1)-C(2)-C(3)  | 120.8(6)  |
| F(2)-Pd-N(26)  | 90.47(15)  | N(1)-C(2)-H(2)  | 119.6     |
| C(35)-Pd-N(26) | 82.8(2)    | C(3)-C(2)-H(2)  | 119.6     |
| F(2)-Pd-N(13)  | 173.48(15) | C(4)-C(3)-C(2)  | 118.5(6)  |
| C(35)-Pd-N(13) | 85.77(19)  | C(4)-C(3)-H(3)  | 120.7     |
| N(26)-Pd-N(13) | 89.85(18)  | C(2)-C(3)-H(3)  | 120.7     |
| F(2)-Pd-N(1)   | 92.23(17)  | C(5)-C(4)-C(3)  | 120.8(6)  |
| C(35)-Pd-N(1)  | 100.5(2)   | C(5)-C(4)-H(4)  | 119.6     |
| N(26)-Pd-N(1)  | 175.84(18) | C(3)-C(4)-H(4)  | 119.6     |
| N(13)-Pd-N(1)  | 87.82(18)  | C(4)-C(5)-C(6)  | 119.9(6)  |
| F(2)-Pd-F(1)   | 88.27(13)  | C(4)-C(5)-H(5)  | 120.1     |
| C(35)-Pd-F(1)  | 172.95(18) | C(6)-C(5)-H(5)  | 120.1     |
| N(26)-Pd-F(1)  | 91.38(16)  | N(1)-C(6)-C(5)  | 119.5(5)  |
| N(13)-Pd-F(1)  | 98.24(14)  | N(1)-C(6)-C(7)  | 118.7(5)  |
| N(1)-Pd-F(1)   | 85.54(15)  | C(5)-C(6)-C(7)  | 121.8(5)  |
| C(6)-N(1)-C(2) | 120.3(5)   | C(12)-C(7)-C(8) | 118.5(5)  |
| C(6)-N(1)-Pd   | 124.6(4)   | C(12)-C(7)-C(6) | 123.5(5)  |

---

|                   |          |                     |          |
|-------------------|----------|---------------------|----------|
| C(8)-C(7)-C(6)    | 117.9(5) | C(17)-C(18)-H(18)   | 119.6    |
| C(9)-C(8)-C(7)    | 120.7(6) | C(18)-C(19)-C(20)   | 120.1(6) |
| C(9)-C(8)-H(8)    | 119.6    | C(18)-C(19)-H(19)   | 119.9    |
| C(7)-C(8)-H(8)    | 119.6    | C(20)-C(19)-H(19)   | 119.9    |
| C(8)-C(9)-C(10)   | 120.8(6) | C(21)-C(20)-C(19)   | 120.7(6) |
| C(8)-C(9)-H(9)    | 119.6    | C(21)-C(20)-H(20)   | 119.7    |
| C(10)-C(9)-H(9)   | 119.6    | C(19)-C(20)-H(20)   | 119.7    |
| C(11)-C(10)-C(9)  | 119.8(6) | C(20)-C(21)-C(22)   | 118.0(6) |
| C(11)-C(10)-H(10) | 120.1    | C(20)-C(21)-H(21)   | 121.0    |
| C(9)-C(10)-H(10)  | 120.1    | C(22)-C(21)-H(21)   | 121.0    |
| C(10)-C(11)-C(12) | 120.4(6) | C(17)-C(22)-C(21)   | 122.5(6) |
| C(10)-C(11)-H(11) | 119.8    | C(17)-C(22)-N(23)   | 123.1(5) |
| C(12)-C(11)-H(11) | 119.8    | C(21)-C(22)-N(23)   | 114.3(5) |
| C(11)-C(12)-C(7)  | 119.8(5) | O(25)-N(23)-O(24)   | 125.4(6) |
| C(11)-C(12)-N(13) | 119.9(5) | O(25)-N(23)-C(22)   | 116.6(6) |
| C(7)-C(12)-N(13)  | 120.2(5) | O(24)-N(23)-C(22)   | 117.9(6) |
| C(12)-N(13)-S(14) | 115.2(3) | C(27)-N(26)-C(35B)  | 121.2(5) |
| C(12)-N(13)-Pd    | 113.3(3) | C(27)-N(26)-Pd      | 126.2(4) |
| S(14)-N(13)-Pd    | 126.1(2) | C(35B)-N(26)-Pd     | 112.6(4) |
| O(15)-S(14)-O(16) | 118.9(2) | N(26)-C(27)-C(28)   | 121.0(6) |
| O(15)-S(14)-N(13) | 108.9(2) | N(26)-C(27)-H(27)   | 119.5    |
| O(16)-S(14)-N(13) | 108.4(2) | C(28)-C(27)-H(27)   | 119.5    |
| O(15)-S(14)-C(17) | 108.0(2) | C(29)-C(28)-C(27)   | 119.4(6) |
| O(16)-S(14)-C(17) | 106.3(3) | C(29)-C(28)-H(28)   | 120.3    |
| N(13)-S(14)-C(17) | 105.6(2) | C(27)-C(28)-H(28)   | 120.3    |
| C(22)-C(17)-C(18) | 117.7(5) | C(28)-C(29)-C(29A)  | 120.9(6) |
| C(22)-C(17)-S(14) | 124.2(4) | C(28)-C(29)-H(29)   | 119.5    |
| C(18)-C(17)-S(14) | 118.0(4) | C(29A)-C(29)-H(29)  | 119.5    |
| C(19)-C(18)-C(17) | 120.8(5) | C(35B)-C(29A)-C(29) | 116.2(6) |
| C(19)-C(18)-H(18) | 119.6    | C(35B)-C(29A)-C(30) | 116.1(6) |

---

|                      |          |                     |        |
|----------------------|----------|---------------------|--------|
| C(29)-C(29A)-C(30)   | 127.6(6) | N(1S)-C(2S)-C(3S)   | 171(6) |
| C(31)-C(30)-C(29A)   | 121.7(6) | C(2S*)-C(3S)-H(3SA) | 99.0   |
| C(31)-C(30)-H(30)    | 119.2    | C(2S)-C(3S)-H(3SA)  | 109.5  |
| C(29A)-C(30)-H(30)   | 119.2    | C(2S*)-C(3S)-H(3SB) | 112.8  |
| C(30)-C(31)-C(31A)   | 122.2(6) | C(2S)-C(3S)-H(3SB)  | 109.5  |
| C(30)-C(31)-H(31)    | 118.9    | H(3SA)-C(3S)-H(3SB) | 109.5  |
| C(31A)-C(31)-H(31)   | 118.9    | C(2S*)-C(3S)-H(3SC) | 116.1  |
| C(35A)-C(31A)-C(32)  | 117.4(6) | C(2S)-C(3S)-H(3SC)  | 109.5  |
| C(35A)-C(31A)-C(31)  | 117.3(6) | H(3SA)-C(3S)-H(3SC) | 109.5  |
| C(32)-C(31A)-C(31)   | 125.2(6) | H(3SB)-C(3S)-H(3SC) | 109.5  |
| C(33)-C(32)-C(31A)   | 120.1(6) | C(2S*)-C(3S)-H(3SD) | 109.5  |
| C(33)-C(32)-H(32)    | 119.9    | C(2S)-C(3S)-H(3SD)  | 99.5   |
| C(31A)-C(32)-H(32)   | 119.9    | H(3SA)-C(3S)-H(3SD) | 149.6  |
| C(32)-C(33)-C(34)    | 121.9(6) | H(3SB)-C(3S)-H(3SD) | 49.8   |
| C(32)-C(33)-H(33)    | 119.0    | H(3SC)-C(3S)-H(3SD) | 67.5   |
| C(34)-C(33)-H(33)    | 119.0    | C(2S*)-C(3S)-H(3SE) | 109.5  |
| C(35)-C(34)-C(33)    | 118.8(6) | C(2S)-C(3S)-H(3SE)  | 110.9  |
| C(35)-C(34)-H(34)    | 120.6    | H(3SA)-C(3S)-H(3SE) | 69.0   |
| C(33)-C(34)-H(34)    | 120.6    | H(3SB)-C(3S)-H(3SE) | 137.3  |
| C(34)-C(35)-C(35A)   | 119.4(5) | H(3SD)-C(3S)-H(3SE) | 109.5  |
| C(34)-C(35)-Pd       | 130.4(5) | C(2S*)-C(3S)-H(3SF) | 109.5  |
| C(35A)-C(35)-Pd      | 110.2(4) | C(2S)-C(3S)-H(3SF)  | 117.5  |
| C(31A)-C(35A)-C(35)  | 122.2(6) | H(3SA)-C(3S)-H(3SF) | 48.7   |
| C(31A)-C(35A)-C(35B) | 119.9(6) | H(3SB)-C(3S)-H(3SF) | 61.5   |
| C(35)-C(35A)-C(35B)  | 117.7(5) | H(3SC)-C(3S)-H(3SF) | 132.5  |
| N(26)-C(35B)-C(29A)  | 121.2(5) | H(3SD)-C(3S)-H(3SF) | 109.5  |
| N(26)-C(35B)-C(35A)  | 116.0(5) | H(3SE)-C(3S)-H(3SF) | 109.5  |
| C(29A)-C(35B)-C(35A) | 122.7(5) | N(1S*)-C(2S*)-C(3S) | 172(6) |

---

Table 4. Anisotropic displacement parameters ( $\text{\AA}^2 \times 10^3$ ) for the difluoro palladium(IV) complex **3**.The anisotropic displacement factor exponent takes the form:  $-2\pi^2 [ h^2 a^{*2} U_{11} + \dots + 2 h k a^* b^* U_{12} ]$ 

|       | $U_{11}$ | $U_{22}$ | $U_{33}$ | $U_{23}$ | $U_{13}$ | $U_{12}$ |
|-------|----------|----------|----------|----------|----------|----------|
| Pd    | 19(1)    | 24(1)    | 22(1)    | 0(1)     | 4(1)     | 0(1)     |
| F(1)  | 21(2)    | 42(2)    | 33(2)    | 0(2)     | 8(2)     | 1(2)     |
| F(2)  | 36(2)    | 40(2)    | 26(2)    | 6(2)     | 8(2)     | -1(2)    |
| N(1)  | 23(3)    | 20(3)    | 34(3)    | -3(2)    | 5(2)     | -2(2)    |
| C(2)  | 33(4)    | 31(4)    | 36(4)    | 7(3)     | 13(3)    | 0(3)     |
| C(3)  | 27(4)    | 27(4)    | 72(6)    | 4(4)     | 13(4)    | -10(3)   |
| C(4)  | 38(4)    | 23(4)    | 61(5)    | -13(4)   | 10(4)    | -2(3)    |
| C(5)  | 28(4)    | 31(4)    | 41(4)    | -9(3)    | 5(3)     | -1(3)    |
| C(6)  | 17(3)    | 25(4)    | 38(4)    | -2(3)    | 1(3)     | 5(3)     |
| C(7)  | 18(3)    | 20(4)    | 19(3)    | -3(3)    | -1(3)    | 3(3)     |
| C(8)  | 23(3)    | 24(4)    | 32(4)    | -6(3)    | -2(3)    | 3(3)     |
| C(9)  | 19(3)    | 46(5)    | 32(4)    | -14(3)   | 1(3)     | 2(3)     |
| C(10) | 25(3)    | 52(5)    | 28(4)    | -3(4)    | 7(3)     | -8(4)    |
| C(11) | 19(3)    | 35(4)    | 25(4)    | 1(3)     | 4(3)     | -2(3)    |
| C(12) | 14(3)    | 27(3)    | 19(3)    | -1(3)    | -5(2)    | 6(3)     |
| N(13) | 15(2)    | 21(3)    | 26(3)    | 0(2)     | 2(2)     | 6(2)     |
| S(14) | 24(1)    | 20(1)    | 31(1)    | -1(1)    | 0(1)     | 1(1)     |
| O(15) | 28(2)    | 26(2)    | 39(3)    | -6(2)    | 4(2)     | 13(2)    |
| O(16) | 30(2)    | 23(2)    | 31(2)    | 10(2)    | 0(2)     | -5(2)    |
| C(17) | 16(3)    | 23(4)    | 31(4)    | 0(3)     | 2(3)     | 6(3)     |
| C(18) | 18(3)    | 35(4)    | 27(3)    | 8(3)     | 5(3)     | 8(3)     |
| C(19) | 18(3)    | 39(4)    | 45(4)    | 2(3)     | 6(3)     | -3(3)    |
| C(20) | 24(4)    | 43(5)    | 39(4)    | -8(4)    | 1(3)     | -7(3)    |
| C(21) | 29(4)    | 38(4)    | 34(4)    | -11(3)   | 0(3)     | 1(3)     |
| C(22) | 24(3)    | 27(4)    | 31(4)    | 3(3)     | 7(3)     | 8(3)     |

---

|        |        |        |        |         |        |        |
|--------|--------|--------|--------|---------|--------|--------|
| N(23)  | 38(4)  | 53(4)  | 26(3)  | -7(3)   | 3(3)   | -11(3) |
| O(24)  | 59(3)  | 54(4)  | 44(3)  | 18(3)   | -6(2)  | -6(3)  |
| O(25)  | 64(4)  | 62(4)  | 77(4)  | -13(3)  | 48(3)  | -10(3) |
| N(26)  | 25(3)  | 29(3)  | 19(3)  | -1(2)   | 5(2)   | 0(2)   |
| C(27)  | 39(4)  | 30(4)  | 20(3)  | 3(3)    | 7(3)   | 6(3)   |
| C(28)  | 44(4)  | 33(4)  | 22(3)  | -7(3)   | 0(3)   | 5(4)   |
| C(29)  | 63(5)  | 25(4)  | 22(4)  | 1(3)    | -5(3)  | -3(4)  |
| C(29A) | 43(4)  | 34(4)  | 22(4)  | 5(3)    | -4(3)  | -10(3) |
| C(30)  | 43(4)  | 44(5)  | 29(4)  | 0(3)    | -11(3) | -20(4) |
| C(31)  | 33(4)  | 55(5)  | 26(4)  | 5(4)    | 3(3)   | -19(4) |
| C(31A) | 31(4)  | 44(5)  | 20(4)  | 4(3)    | 1(3)   | -1(3)  |
| C(32)  | 21(3)  | 74(5)  | 21(3)  | 8(4)    | 1(3)   | 2(4)   |
| C(33)  | 28(4)  | 62(5)  | 32(4)  | -1(4)   | 7(3)   | 17(4)  |
| C(34)  | 23(3)  | 37(4)  | 23(3)  | 2(3)    | 1(3)   | 0(3)   |
| C(35)  | 18(3)  | 39(4)  | 18(3)  | -1(3)   | 4(2)   | -2(3)  |
| C(35A) | 19(3)  | 40(4)  | 7(3)   | 4(3)    | -2(2)  | 1(3)   |
| C(35B) | 26(4)  | 27(4)  | 16(3)  | 2(3)    | 2(3)   | 2(3)   |
| N(1S)  | 70(17) | 51(11) | 80(20) | 13(10)  | 26(17) | 23(12) |
| C(2S)  | 66(17) | 51(13) | 26(16) | -3(11)  | 11(15) | 15(10) |
| C(3S)  | 66(5)  | 48(5)  | 42(4)  | 4(4)    | 4(4)   | 9(4)   |
| N(1S*) | 55(14) | 42(12) | 69(16) | -2(9)   | 10(14) | 6(11)  |
| C(2S*) | 58(14) | 44(12) | 40(20) | -14(11) | -4(11) | -3(10) |

---

Table 5. Hydrogen coordinates ( $\times 10^4$ ) and isotropic displacement parameters ( $\text{\AA}^2 \times 10^3$ ) for the difluoro palladium(IV) complex **3**.

|        | x     | y     | z    | U(eq) |
|--------|-------|-------|------|-------|
| H(2)   | 5444  | 3054  | 865  | 39    |
| H(3)   | 6627  | 4439  | 1341 | 50    |
| H(4)   | 6383  | 4881  | 2382 | 49    |
| H(5)   | 4911  | 4021  | 2918 | 40    |
| H(8)   | 2622  | 3708  | 2930 | 33    |
| H(9)   | 957   | 2928  | 3376 | 39    |
| H(10)  | 684   | 1198  | 3301 | 41    |
| H(11)  | 2040  | 258   | 2723 | 32    |
| H(18)  | 6995  | 1486  | 2061 | 32    |
| H(19)  | 8505  | 2684  | 2537 | 41    |
| H(20)  | 8643  | 3050  | 3630 | 43    |
| H(21)  | 7400  | 2122  | 4271 | 41    |
| H(27)  | 5051  | -392  | 585  | 36    |
| H(28)  | 4247  | -1934 | 170  | 40    |
| H(29)  | 2017  | -2376 | 190  | 45    |
| H(30)  | -402  | -1805 | 418  | 49    |
| H(31)  | -1687 | -583  | 764  | 46    |
| H(32)  | -1896 | 1248  | 1139 | 47    |
| H(33)  | -861  | 2779  | 1368 | 48    |
| H(34)  | 1479  | 2987  | 1394 | 33    |
| H(3SA) | 2038  | 4302  | 189  | 78    |
| H(3SB) | 2030  | 4792  | 882  | 78    |
| H(3SC) | 3201  | 4026  | 776  | 78    |
| H(3SD) | 2798  | 4616  | 1047 | 78    |
| H(3SE) | 2951  | 3919  | 445  | 78    |
| H(3SF) | 1627  | 4593  | 433  | 78    |

Table 6. Torsion angles [°] for the difluoro palladium(IV) complex **3**.

|                        |           |                         |           |
|------------------------|-----------|-------------------------|-----------|
| F(2)-Pd-N(1)-C(6)      | 149.0(4)  | C(10)-C(11)-C(12)-N(13) | -175.5(5) |
| C(35)-Pd-N(1)-C(6)     | 60.8(5)   | C(8)-C(7)-C(12)-C(11)   | -0.1(7)   |
| N(13)-Pd-N(1)-C(6)     | -24.5(4)  | C(6)-C(7)-C(12)-C(11)   | -177.0(5) |
| F(1)-Pd-N(1)-C(6)      | -122.9(4) | C(8)-C(7)-C(12)-N(13)   | 176.0(4)  |
| F(2)-Pd-N(1)-C(2)      | -42.1(4)  | C(6)-C(7)-C(12)-N(13)   | -0.9(8)   |
| C(35)-Pd-N(1)-C(2)     | -130.3(4) | C(11)-C(12)-N(13)-S(14) | -78.2(5)  |
| N(13)-Pd-N(1)-C(2)     | 144.4(4)  | C(7)-C(12)-N(13)-S(14)  | 105.6(5)  |
| F(1)-Pd-N(1)-C(2)      | 46.0(4)   | C(11)-C(12)-N(13)-Pd    | 126.1(4)  |
| C(6)-N(1)-C(2)-C(3)    | 0.8(8)    | C(7)-C(12)-N(13)-Pd     | -50.0(5)  |
| Pd-N(1)-C(2)-C(3)      | -168.6(4) | C(35)-Pd-N(13)-C(12)    | -46.7(4)  |
| N(1)-C(2)-C(3)-C(4)    | 1.1(9)    | N(26)-Pd-N(13)-C(12)    | -129.5(4) |
| C(2)-C(3)-C(4)-C(5)    | -1.8(10)  | N(1)-Pd-N(13)-C(12)     | 54.0(4)   |
| C(3)-C(4)-C(5)-C(6)    | 0.7(9)    | F(1)-Pd-N(13)-C(12)     | 139.1(3)  |
| C(2)-N(1)-C(6)-C(5)    | -2.0(8)   | C(35)-Pd-N(13)-S(14)    | 160.8(3)  |
| Pd-N(1)-C(6)-C(5)      | 166.2(4)  | N(26)-Pd-N(13)-S(14)    | 78.0(3)   |
| C(2)-N(1)-C(6)-C(7)    | 177.8(5)  | N(1)-Pd-N(13)-S(14)     | -98.5(3)  |
| Pd-N(1)-C(6)-C(7)      | -14.0(7)  | F(1)-Pd-N(13)-S(14)     | -13.4(3)  |
| C(4)-C(5)-C(6)-N(1)    | 1.2(9)    | C(12)-N(13)-S(14)-O(15) | 179.1(4)  |
| C(4)-C(5)-C(6)-C(7)    | -178.5(5) | Pd-N(13)-S(14)-O(15)    | -28.8(4)  |
| N(1)-C(6)-C(7)-C(12)   | 36.8(8)   | C(12)-N(13)-S(14)-O(16) | 48.5(5)   |
| C(5)-C(6)-C(7)-C(12)   | -143.4(6) | Pd-N(13)-S(14)-O(16)    | -159.5(3) |
| N(1)-C(6)-C(7)-C(8)    | -140.1(5) | C(12)-N(13)-S(14)-C(17) | -65.1(4)  |
| C(5)-C(6)-C(7)-C(8)    | 39.6(8)   | Pd-N(13)-S(14)-C(17)    | 86.9(3)   |
| C(12)-C(7)-C(8)-C(9)   | -1.3(8)   | O(15)-S(14)-C(17)-C(22) | -139.7(5) |
| C(6)-C(7)-C(8)-C(9)    | 175.8(5)  | O(16)-S(14)-C(17)-C(22) | -11.0(5)  |
| C(7)-C(8)-C(9)-C(10)   | 2.2(9)    | N(13)-S(14)-C(17)-C(22) | 103.9(5)  |
| C(8)-C(9)-C(10)-C(11)  | -1.6(9)   | O(15)-S(14)-C(17)-C(18) | 44.1(5)   |
| C(9)-C(10)-C(11)-C(12) | 0.1(8)    | O(16)-S(14)-C(17)-C(18) | 172.7(4)  |
| C(10)-C(11)-C(12)-C(7) | 0.7(8)    | N(13)-S(14)-C(17)-C(18) | -72.3(5)  |

---

|                           |           |                            |           |
|---------------------------|-----------|----------------------------|-----------|
| C(22)-C(17)-C(18)-C(19)   | 0.3(8)    | C(29)-C(29A)-C(30)-C(31)   | -177.1(6) |
| S(14)-C(17)-C(18)-C(19)   | 176.8(4)  | C(29A)-C(30)-C(31)-C(31A)  | 1.2(9)    |
| C(17)-C(18)-C(19)-C(20)   | -1.7(9)   | C(30)-C(31)-C(31A)-C(35A)  | -2.3(9)   |
| C(18)-C(19)-C(20)-C(21)   | 2.6(9)    | C(30)-C(31)-C(31A)-C(32)   | 173.5(6)  |
| C(19)-C(20)-C(21)-C(22)   | -2.0(9)   | C(35A)-C(31A)-C(32)-C(33)  | 1.6(8)    |
| C(18)-C(17)-C(22)-C(21)   | 0.2(8)    | C(31)-C(31A)-C(32)-C(33)   | -174.3(6) |
| S(14)-C(17)-C(22)-C(21)   | -176.0(4) | C(31A)-C(32)-C(33)-C(34)   | -2.1(9)   |
| C(18)-C(17)-C(22)-N(23)   | -179.3(5) | C(32)-C(33)-C(34)-C(35)    | -0.3(9)   |
| S(14)-C(17)-C(22)-N(23)   | 4.5(8)    | C(33)-C(34)-C(35)-C(35A)   | 3.2(8)    |
| C(20)-C(21)-C(22)-C(17)   | 0.6(9)    | C(33)-C(34)-C(35)-Pd       | -177.1(4) |
| C(20)-C(21)-C(22)-N(23)   | -179.9(5) | F(2)-Pd-C(35)-C(34)        | -81.6(5)  |
| C(17)-C(22)-N(23)-O(25)   | -100.3(7) | N(26)-Pd-C(35)-C(34)       | -172.3(5) |
| C(21)-C(22)-N(23)-O(25)   | 80.1(7)   | N(13)-Pd-C(35)-C(34)       | 97.3(5)   |
| C(17)-C(22)-N(23)-O(24)   | 81.9(7)   | N(1)-Pd-C(35)-C(34)        | 10.3(5)   |
| C(21)-C(22)-N(23)-O(24)   | -97.7(6)  | F(2)-Pd-C(35)-C(35A)       | 98.2(4)   |
| F(2)-Pd-N(26)-C(27)       | 85.0(4)   | N(26)-Pd-C(35)-C(35A)      | 7.4(4)    |
| C(35)-Pd-N(26)-C(27)      | 172.8(5)  | N(13)-Pd-C(35)-C(35A)      | -83.0(4)  |
| N(13)-Pd-N(26)-C(27)      | -101.5(5) | N(1)-Pd-C(35)-C(35A)       | -170.0(4) |
| F(1)-Pd-N(26)-C(27)       | -3.2(5)   | C(32)-C(31A)-C(35A)-C(35)  | 1.4(8)    |
| F(2)-Pd-N(26)-C(35B)      | -94.7(4)  | C(31)-C(31A)-C(35A)-C(35)  | 177.6(5)  |
| C(35)-Pd-N(26)-C(35B)     | -7.0(4)   | C(32)-C(31A)-C(35A)-C(35B) | -175.1(5) |
| N(13)-Pd-N(26)-C(35B)     | 78.7(4)   | C(31)-C(31A)-C(35A)-C(35B) | 1.0(8)    |
| F(1)-Pd-N(26)-C(35B)      | 177.0(4)  | C(34)-C(35)-C(35A)-C(31A)  | -3.8(8)   |
| C(35B)-N(26)-C(27)-C(28)  | -1.3(8)   | Pd-C(35)-C(35A)-C(31A)     | 176.4(4)  |
| Pd-N(26)-C(27)-C(28)      | 179.0(4)  | C(34)-C(35)-C(35A)-C(35B)  | 172.8(5)  |
| N(26)-C(27)-C(28)-C(29)   | -1.0(9)   | Pd-C(35)-C(35A)-C(35B)     | -7.0(6)   |
| C(27)-C(28)-C(29)-C(29A)  | 2.6(9)    | C(27)-N(26)-C(35B)-C(29A)  | 2.1(8)    |
| C(28)-C(29)-C(29A)-C(35B) | -1.8(8)   | Pd-N(26)-C(35B)-C(29A)     | -178.1(4) |
| C(28)-C(29)-C(29A)-C(30)  | 176.4(6)  | C(27)-N(26)-C(35B)-C(35A)  | -174.7(5) |
| C(35B)-C(29A)-C(30)-C(31) | 1.2(9)    | Pd-N(26)-C(35B)-C(35A)     | 5.1(6)    |



---

|                             |           |
|-----------------------------|-----------|
| C(29)-C(29A)-C(35B)-N(26)   | -0.5(8)   |
| C(30)-C(29A)-C(35B)-N(26)   | -178.9(5) |
| C(29)-C(29A)-C(35B)-C(35A)  | 176.0(5)  |
| C(30)-C(29A)-C(35B)-C(35A)  | -2.4(8)   |
| C(31A)-C(35A)-C(35B)-N(26)  | 178.0(5)  |
| C(35)-C(35A)-C(35B)-N(26)   | 1.3(7)    |
| C(31A)-C(35A)-C(35B)-C(29A) | 1.3(8)    |
| C(35)-C(35A)-C(35B)-C(29A)  | -175.3(5) |

---

## Monofluoro Pd(II) complex 11 (CCDC749260)

### Experimental

The compound was crystallized from a dichloromethane / diethyl ether solution as colorless prisms. One of the prisms was cut to 0.120 mm x 0.180 mm x 0.230 mm in size, mounted on a nylon loop with Paratone-N oil, and transferred to a Bruker SMART APEX II diffractometer equipped with an Oxford Cryosystems 700 Series Cryostream Cooler and Mo K $\alpha$  radiation ( $\lambda = 0.71073 \text{ \AA}$ ). A total of 3064 frames were collected at 193 (2) K to  $\theta_{\text{max}} = 27.50^\circ$  with an oscillation range of  $0.5^\circ/\text{frame}$ , and an exposure time of 20 s/frame using the APEX2 suite of software. (Bruker AXS, 2006a) Unit cell refinement on all observed reflections, and data reduction with corrections for Lp and decay were performed using SAINT. (Bruker AXS, 2006b) Scaling was done using SADABS. (Bruker AXS, 2004) The minimum and maximum transmission factors were 0.7875 and 0.8802, respectively. A total of 95236 reflections were collected, 9929 were unique ( $R_{\text{int}} = 0.0382$ ), and 8417 had  $I > 2\sigma(I)$ . Systematic absences were consistent with the compound having crystallized in the monoclinic space group  $P2_1/c$  (No. 14). The observed mean  $|E^2-1|$  value was 0.875 (versus the expectation values of 0.968 and 0.736 for centric and noncentric data, respectively).

The structure was solved by direct methods and refined by full-matrix least-squares on  $F^2$  using SHELXTL. (Bruker AXS, 2001) The asymmetric unit was found to contain one molecule of [(2-Nitrophenylsulfonyl)(2-(pyridin-2-yl)phenyl)amido](pyridine)palladium(II) fluoride and one molecule of dichloromethane. The pyridine ligand was found to be mildly disordered; this disorder was not treated since treatment of the disorder would not significantly improve the  $R(F)$  and  $wR(F^2)$  values. All of the nonhydrogen atoms were refined with anisotropic displacement coefficients. The hydrogen atoms were assigned isotropic displacement coefficients  $U(\text{H}) = 1.2U(\text{C})$  and their coordinates were allowed to ride on their respective carbons. The refinement converged to  $R(F) = 0.0257$ ,  $wR(F^2) = 0.0625$ , and  $S = 1.048$  for 8417 reflections with  $I > 2\sigma(I)$ , and  $R(F) = 0.0347$ ,  $wR(F^2) = 0.0674$ , and  $S = 1.048$  for 9929 unique reflections, 325 parameters, and 0 restraints. The maximum  $|\Delta/\sigma|$  in the final cycle of least-squares was 0.003, and the residual peaks on the final difference-Fourier map ranged from  $-0.730$  to  $0.819 \text{ e\AA}^{-3}$ . Scattering factors were taken from the International Tables for Crystallography, Volume C. (Maslen *et al.*, 1992, and Creagh & McAuley, 1992)

### References

- Bruker AXS (2001). *SHELXTL v6.12*. Bruker Analytical X-ray Systems Inc., Madison, Wisconsin, USA.
- Bruker AXS (2004). *SADABS*. Bruker Analytical X-ray Systems Inc., Madison, Wisconsin, USA.
- Bruker AXS (2006a). *APEX2 v2.1-0*. Bruker Analytical X-ray Systems Inc., Madison, Wisconsin, USA.
- Bruker AXS (2006b). *SAINTE V7.34A*. Bruker Analytical X-ray Systems Inc., Madison, Wisconsin, USA.
- Creagh, D. C. & McAuley, W. J. (1992). *International Tables for Crystallography: Mathematical,*

*Physical and Chemical Tables*, Vol C, edited by A. J. C. Wilson, pp. 206-222. Dordrecht, The Netherlands: Kluwer.

Maslen, E. N., Fox, A. G. & O'Keefe, M. A. (1992). *International Tables for Crystallography: Mathematical, Physical and Chemical Tables*, Vol C, edited by A. J. C. Wilson, pp. 476-516. Dordrecht, The Netherlands: Kluwer.

$R(F) = R1 = \Sigma ||F_o| - |F_c|| / \Sigma |F_o|$ ,  $wR(F^2) = wR2 = [ \Sigma w (F_o^2 - F_c^2)^2 / \Sigma w (F_o^2)^2 ]^{1/2}$ , and  $S = \text{Goodness-of-fit on } F^2 = [ \Sigma w (F_o^2 - F_c^2)^2 / (n-p) ]^{1/2}$ , where  $n$  is the number of reflections and  $p$  is the number of parameters refined.

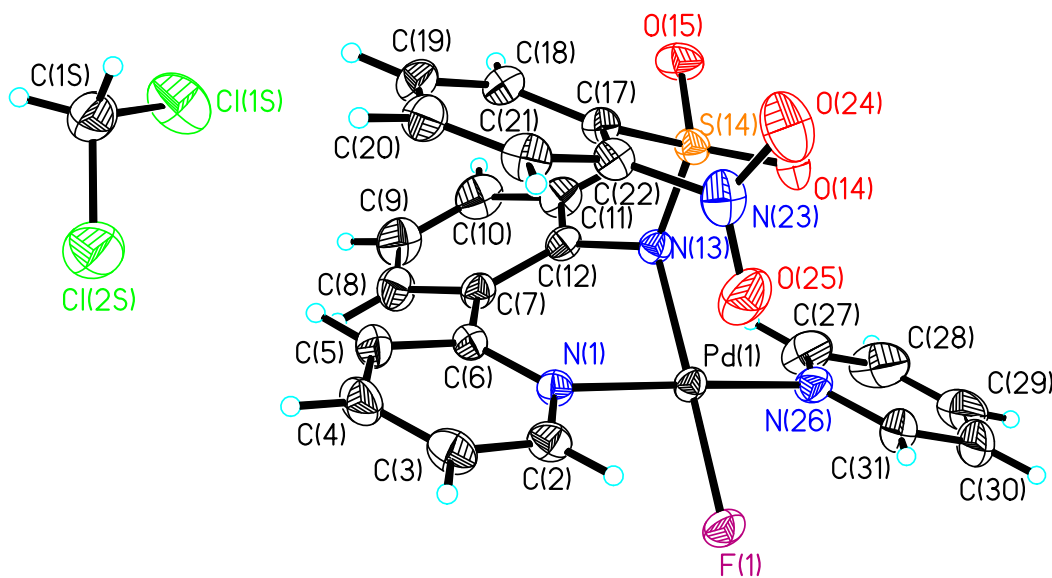

The structure of monofluoro Pd complex **11** dichloromethane solvate with hydrogens and atom labels. The nonhydrogen atoms are depicted with 50% probability ellipsoids.

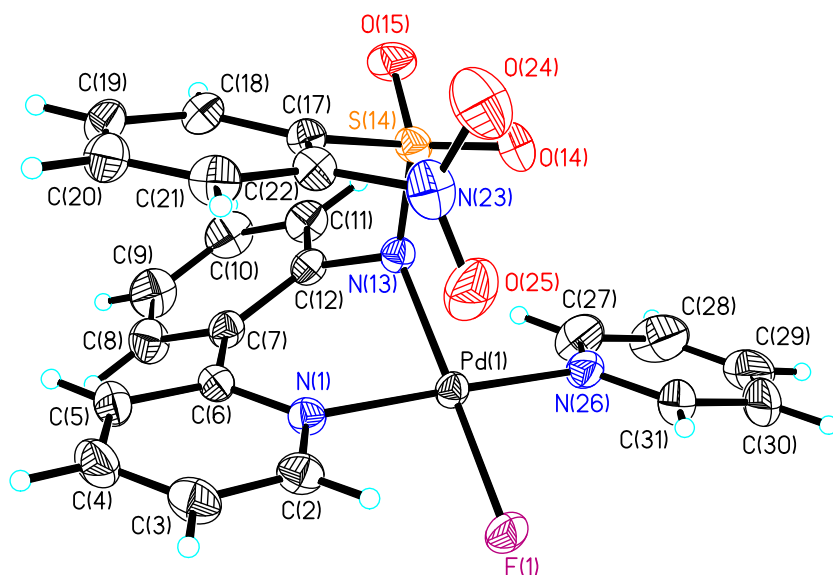

The structure of complex **11** with hydrogens and atom labels. The nonhydrogen atoms are depicted with 50% probability ellipsoids.

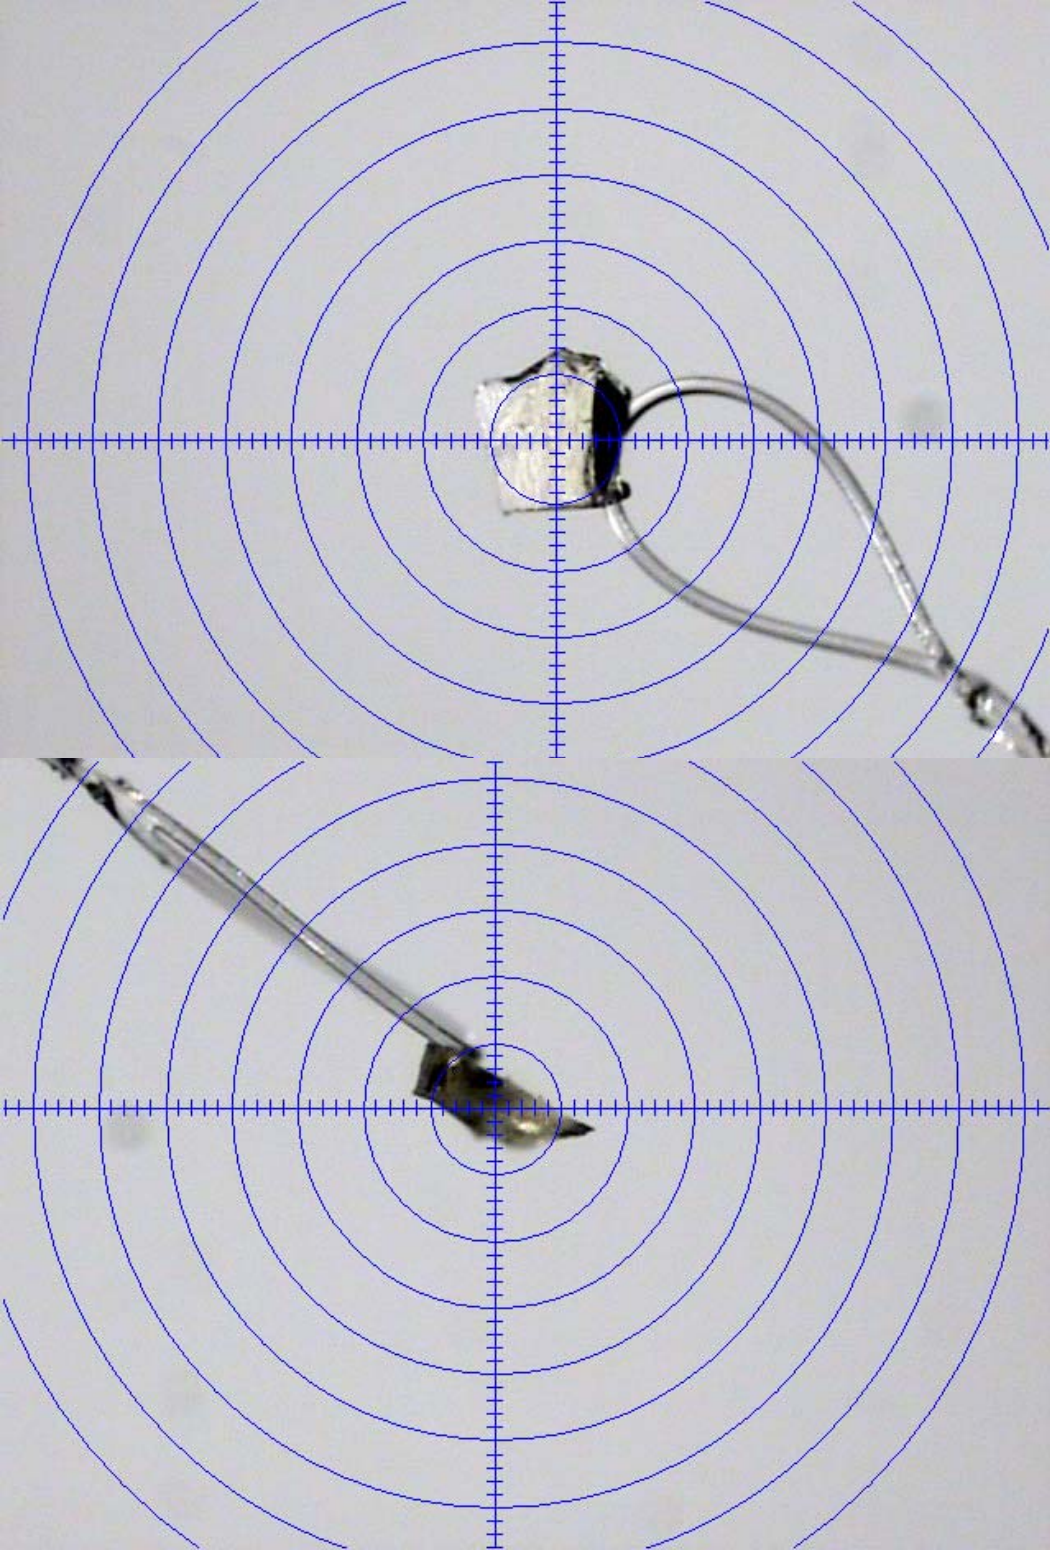

Table 1. Crystal data and structure refinement for compound **11**.

|                                   |                                                                                      |                   |
|-----------------------------------|--------------------------------------------------------------------------------------|-------------------|
| Identification code               | compound <b>11</b> (CCDC749260)                                                      |                   |
| Empirical formula                 | C <sub>23</sub> H <sub>19</sub> Cl <sub>2</sub> F N <sub>4</sub> O <sub>4</sub> Pd S |                   |
| Formula weight                    | 643.78                                                                               |                   |
| Temperature                       | 193(2) K                                                                             |                   |
| Wavelength                        | 0.71073 Å                                                                            |                   |
| Crystal system                    | Monoclinic                                                                           |                   |
| Space group                       | P 2 <sub>1</sub> /c                                                                  |                   |
| Unit cell dimensions              | a = 15.2325(5) Å                                                                     | α = 90°           |
|                                   | b = 11.9436(4) Å                                                                     | β = 101.9750(10)° |
|                                   | c = 13.9760(5) Å                                                                     | γ = 90°           |
| Volume                            | 2487.33(15) Å <sup>3</sup>                                                           |                   |
| Z                                 | 4                                                                                    |                   |
| Density (calculated)              | 1.719 mg/m <sup>3</sup>                                                              |                   |
| Absorption coefficient            | 1.091 mm <sup>-1</sup>                                                               |                   |
| F(000)                            | 1288                                                                                 |                   |
| Crystal size                      | 0.230 x 0.180 x 0.120 mm <sup>3</sup>                                                |                   |
| Theta range for data collection   | 2.19 to 33.73°.                                                                      |                   |
| Index ranges                      | -23 ≤ h ≤ 23, -18 ≤ k ≤ 18, -21 ≤ l ≤ 21                                             |                   |
| Reflections collected             | 95236                                                                                |                   |
| Independent reflections           | 9929 [R(int) = 0.0382]                                                               |                   |
| Completeness to theta = 33.73°    | 99.9 %                                                                               |                   |
| Absorption correction             | Semi-empirical from equivalents                                                      |                   |
| Max. and min. transmission        | 0.8802 and 0.7875                                                                    |                   |
| Refinement method                 | Full-matrix least-squares on F <sup>2</sup>                                          |                   |
| Data / restraints / parameters    | 9929 / 0 / 325                                                                       |                   |
| Goodness-of-fit on F <sup>2</sup> | 1.048                                                                                |                   |
| Final R indices [I > 2σ(I)]       | R1 = 0.0257, wR2 = 0.0625                                                            |                   |
| R indices (all data)              | R1 = 0.0347, wR2 = 0.0674                                                            |                   |
| Largest diff. peak and hole       | 0.819 and -0.730 e.Å <sup>-3</sup>                                                   |                   |

Table 2. Atomic coordinates ( $\times 10^4$ ) and equivalent isotropic displacement parameters ( $\text{\AA}^2 \times 10^3$ ) for Compound **11**.  $U(\text{eq})$  is defined as one third of the trace of the orthogonalized  $U_{ij}$  tensor.

|       | x       | y        | z       | $U(\text{eq})$ |
|-------|---------|----------|---------|----------------|
| Pd(1) | 2696(1) | 9893(1)  | 2172(1) | 20(1)          |
| F(1)  | 3641(1) | 10458(1) | 1513(1) | 31(1)          |
| N(1)  | 3388(1) | 8472(1)  | 2560(1) | 22(1)          |
| C(2)  | 4289(1) | 8544(1)  | 2808(1) | 27(1)          |
| C(3)  | 4823(1) | 7616(1)  | 3072(1) | 33(1)          |
| C(4)  | 4421(1) | 6582(1)  | 3091(1) | 35(1)          |
| C(5)  | 3497(1) | 6510(1)  | 2847(1) | 31(1)          |
| C(6)  | 2978(1) | 7465(1)  | 2567(1) | 23(1)          |
| C(7)  | 1985(1) | 7380(1)  | 2277(1) | 24(1)          |
| C(8)  | 1608(1) | 6379(1)  | 1856(1) | 34(1)          |
| C(9)  | 690(1)  | 6220(2)  | 1624(1) | 41(1)          |
| C(10) | 122(1)  | 7058(2)  | 1799(1) | 39(1)          |
| C(11) | 472(1)  | 8071(1)  | 2194(1) | 31(1)          |
| C(12) | 1398(1) | 8238(1)  | 2435(1) | 23(1)          |
| N(13) | 1735(1) | 9300(1)  | 2805(1) | 21(1)          |
| S(14) | 1739(1) | 9579(1)  | 3927(1) | 23(1)          |
| O(14) | 2081(1) | 10694(1) | 4124(1) | 32(1)          |
| O(15) | 887(1)  | 9304(1)  | 4155(1) | 33(1)          |
| C(17) | 2515(1) | 8622(1)  | 4617(1) | 23(1)          |
| C(18) | 2227(1) | 7517(1)  | 4679(1) | 28(1)          |
| C(19) | 2828(1) | 6687(1)  | 5072(1) | 32(1)          |
| C(20) | 3726(1) | 6939(1)  | 5406(1) | 33(1)          |
| C(21) | 4024(1) | 8033(1)  | 5386(1) | 32(1)          |
| C(22) | 3413(1) | 8856(1)  | 4996(1) | 25(1)          |
| N(23) | 3762(1) | 10011(1) | 5030(1) | 34(1)          |

|        |         |          |         |       |
|--------|---------|----------|---------|-------|
| O(24)  | 3747(1) | 10546(1) | 5768(1) | 55(1) |
| O(25)  | 4061(1) | 10351(1) | 4342(1) | 47(1) |
| N(26)  | 1956(1) | 11264(1) | 1692(1) | 28(1) |
| C(27)  | 1082(1) | 11173(2) | 1287(1) | 43(1) |
| C(28)  | 593(1)  | 12071(2) | 826(2)  | 57(1) |
| C(29)  | 1009(2) | 13085(2) | 790(2)  | 55(1) |
| C(30)  | 1895(2) | 13183(2) | 1220(2) | 51(1) |
| C(31)  | 2356(1) | 12255(1) | 1662(1) | 37(1) |
| C(1S)  | 3028(1) | 3293(2)  | 4461(2) | 46(1) |
| Cl(1S) | 2004(1) | 3921(1)  | 3904(1) | 62(1) |
| Cl(2S) | 3866(1) | 3582(1)  | 3793(1) | 59(1) |

---



Table 3. Bond lengths [ $\text{\AA}$ ] and angles [ $^\circ$ ] for compound **11**.

|             |            |              |            |
|-------------|------------|--------------|------------|
| Pd(1)-F(1)  | 1.9806(9)  | S(14)-O(15)  | 1.4377(11) |
| Pd(1)-N(13) | 1.9917(11) | S(14)-C(17)  | 1.7780(13) |
| Pd(1)-N(1)  | 2.0112(11) | C(17)-C(22)  | 1.3888(19) |
| Pd(1)-N(26) | 2.0218(12) | C(17)-C(18)  | 1.3984(19) |
| N(1)-C(2)   | 1.3476(18) | C(18)-C(19)  | 1.383(2)   |
| N(1)-C(6)   | 1.3561(16) | C(18)-H(18)  | 0.9500     |
| C(2)-C(3)   | 1.380(2)   | C(19)-C(20)  | 1.383(2)   |
| C(2)-H(2)   | 0.9500     | C(19)-H(19)  | 0.9500     |
| C(3)-C(4)   | 1.380(2)   | C(20)-C(21)  | 1.385(2)   |
| C(3)-H(3)   | 0.9500     | C(20)-H(20)  | 0.9500     |
| C(4)-C(5)   | 1.382(2)   | C(21)-C(22)  | 1.386(2)   |
| C(4)-H(4)   | 0.9500     | C(21)-H(21)  | 0.9500     |
| C(5)-C(6)   | 1.3961(19) | C(22)-N(23)  | 1.4756(18) |
| C(5)-H(5)   | 0.9500     | N(23)-O(24)  | 1.217(2)   |
| C(6)-C(7)   | 1.4862(19) | N(23)-O(25)  | 1.217(2)   |
| C(7)-C(8)   | 1.4008(19) | N(26)-C(31)  | 1.337(2)   |
| C(7)-C(12)  | 1.4077(19) | N(26)-C(27)  | 1.339(2)   |
| C(8)-C(9)   | 1.381(2)   | C(27)-C(28)  | 1.386(2)   |
| C(8)-H(8)   | 0.9500     | C(27)-H(27)  | 0.9500     |
| C(9)-C(10)  | 1.378(3)   | C(28)-C(29)  | 1.372(3)   |
| C(9)-H(9)   | 0.9500     | C(28)-H(28)  | 0.9500     |
| C(10)-C(11) | 1.390(2)   | C(29)-C(30)  | 1.363(3)   |
| C(10)-H(10) | 0.9500     | C(29)-H(29)  | 0.9500     |
| C(11)-C(12) | 1.3937(19) | C(30)-C(31)  | 1.386(2)   |
| C(11)-H(11) | 0.9500     | C(30)-H(30)  | 0.9500     |
| C(12)-N(13) | 1.4249(16) | C(31)-H(31)  | 0.9500     |
| N(13)-S(14) | 1.6023(11) | C(1S)-Cl(1S) | 1.760(2)   |
| S(14)-O(14) | 1.4356(11) | C(1S)-Cl(2S) | 1.764(2)   |

|                   |            |                   |            |
|-------------------|------------|-------------------|------------|
| C(1S)-H(2S)       | 0.9900     | C(1S)-H(1S)       | 0.9900     |
| F(1)-Pd(1)-N(13)  | 178.59(4)  | C(9)-C(8)-H(8)    | 119.3      |
| F(1)-Pd(1)-N(1)   | 91.32(4)   | C(7)-C(8)-H(8)    | 119.3      |
| N(13)-Pd(1)-N(1)  | 88.40(4)   | C(10)-C(9)-C(8)   | 120.08(15) |
| F(1)-Pd(1)-N(26)  | 88.78(4)   | C(10)-C(9)-H(9)   | 120.0      |
| N(13)-Pd(1)-N(26) | 91.41(5)   | C(8)-C(9)-H(9)    | 120.0      |
| N(1)-Pd(1)-N(26)  | 175.88(5)  | C(9)-C(10)-C(11)  | 119.93(15) |
| C(2)-N(1)-C(6)    | 120.07(12) | C(9)-C(10)-H(10)  | 120.0      |
| C(2)-N(1)-Pd(1)   | 117.64(9)  | C(11)-C(10)-H(10) | 120.0      |
| C(6)-N(1)-Pd(1)   | 122.28(9)  | C(10)-C(11)-C(12) | 120.38(15) |
| N(1)-C(2)-C(3)    | 122.00(14) | C(10)-C(11)-H(11) | 119.8      |
| N(1)-C(2)-H(2)    | 119.0      | C(12)-C(11)-H(11) | 119.8      |
| C(3)-C(2)-H(2)    | 119.0      | C(11)-C(12)-C(7)  | 120.15(12) |
| C(2)-C(3)-C(4)    | 119.01(14) | C(11)-C(12)-N(13) | 119.03(12) |
| C(2)-C(3)-H(3)    | 120.5      | C(7)-C(12)-N(13)  | 120.78(12) |
| C(4)-C(3)-H(3)    | 120.5      | C(12)-N(13)-S(14) | 117.94(9)  |
| C(3)-C(4)-C(5)    | 118.96(14) | C(12)-N(13)-Pd(1) | 113.48(8)  |
| C(3)-C(4)-H(4)    | 120.5      | S(14)-N(13)-Pd(1) | 120.48(6)  |
| C(5)-C(4)-H(4)    | 120.5      | O(14)-S(14)-O(15) | 118.61(7)  |
| C(4)-C(5)-C(6)    | 120.47(14) | O(14)-S(14)-N(13) | 107.94(6)  |
| C(4)-C(5)-H(5)    | 119.8      | O(15)-S(14)-N(13) | 110.43(6)  |
| C(6)-C(5)-H(5)    | 119.8      | O(14)-S(14)-C(17) | 108.60(7)  |
| N(1)-C(6)-C(5)    | 119.47(13) | O(15)-S(14)-C(17) | 105.18(7)  |
| N(1)-C(6)-C(7)    | 120.20(11) | N(13)-S(14)-C(17) | 105.27(6)  |
| C(5)-C(6)-C(7)    | 120.34(12) | C(22)-C(17)-C(18) | 117.57(12) |
| C(8)-C(7)-C(12)   | 117.94(13) | C(22)-C(17)-S(14) | 124.64(10) |
| C(8)-C(7)-C(6)    | 118.57(13) | C(18)-C(17)-S(14) | 117.32(10) |
| C(12)-C(7)-C(6)   | 123.45(11) | C(19)-C(18)-C(17) | 120.71(14) |
| C(9)-C(8)-C(7)    | 121.50(15) | C(19)-C(18)-H(18) | 119.6      |

|                   |            |                     |            |
|-------------------|------------|---------------------|------------|
| C(17)-C(18)-H(18) | 119.6      | N(26)-C(27)-H(27)   | 119.2      |
| C(18)-C(19)-C(20) | 120.29(14) | C(28)-C(27)-H(27)   | 119.2      |
| C(18)-C(19)-H(19) | 119.9      | C(29)-C(28)-C(27)   | 119.5(2)   |
| C(20)-C(19)-H(19) | 119.9      | C(29)-C(28)-H(28)   | 120.3      |
| C(19)-C(20)-C(21) | 120.27(14) | C(27)-C(28)-H(28)   | 120.3      |
| C(19)-C(20)-H(20) | 119.9      | C(30)-C(29)-C(28)   | 118.81(17) |
| C(21)-C(20)-H(20) | 119.9      | C(30)-C(29)-H(29)   | 120.6      |
| C(20)-C(21)-C(22) | 118.69(14) | C(28)-C(29)-H(29)   | 120.6      |
| C(20)-C(21)-H(21) | 120.7      | C(29)-C(30)-C(31)   | 119.44(19) |
| C(22)-C(21)-H(21) | 120.7      | C(29)-C(30)-H(30)   | 120.3      |
| C(21)-C(22)-C(17) | 122.38(13) | C(31)-C(30)-H(30)   | 120.3      |
| C(21)-C(22)-N(23) | 116.25(13) | N(26)-C(31)-C(30)   | 121.99(18) |
| C(17)-C(22)-N(23) | 121.35(12) | N(26)-C(31)-H(31)   | 119.0      |
| O(24)-N(23)-O(25) | 124.74(15) | C(30)-C(31)-H(31)   | 119.0      |
| O(24)-N(23)-C(22) | 116.70(15) | Cl(1S)-C(1S)-Cl(2S) | 110.76(11) |
| O(25)-N(23)-C(22) | 118.53(14) | Cl(1S)-C(1S)-H(2S)  | 109.5      |
| C(31)-N(26)-C(27) | 118.56(14) | Cl(2S)-C(1S)-H(2S)  | 109.5      |
| C(31)-N(26)-Pd(1) | 120.11(11) | Cl(1S)-C(1S)-H(1S)  | 109.5      |
| C(27)-N(26)-Pd(1) | 120.79(11) | Cl(2S)-C(1S)-H(1S)  | 109.5      |
| N(26)-C(27)-C(28) | 121.68(19) | H(2S)-C(1S)-H(1S)   | 108.1      |

---

Table 4. Anisotropic displacement parameters ( $\text{\AA}^2 \times 10^3$ ) for compound **11**. The anisotropic displacement factor exponent takes the form:  $-2\pi^2 [ h^2 a^{*2} U_{11} + \dots + 2 h k a^* b^* U_{12} ]$

|       | $U_{11}$ | $U_{22}$ | $U_{33}$ | $U_{23}$ | $U_{13}$ | $U_{12}$ |
|-------|----------|----------|----------|----------|----------|----------|
| Pd(1) | 18(1)    | 19(1)    | 24(1)    | 1(1)     | 4(1)     | -1(1)    |
| F(1)  | 26(1)    | 29(1)    | 40(1)    | 4(1)     | 13(1)    | -5(1)    |
| N(1)  | 20(1)    | 23(1)    | 24(1)    | 0(1)     | 5(1)     | 0(1)     |
| C(2)  | 20(1)    | 32(1)    | 30(1)    | -2(1)    | 6(1)     | -1(1)    |
| C(3)  | 22(1)    | 42(1)    | 36(1)    | -1(1)    | 6(1)     | 6(1)     |
| C(4)  | 32(1)    | 35(1)    | 39(1)    | 2(1)     | 8(1)     | 13(1)    |
| C(5)  | 32(1)    | 24(1)    | 38(1)    | 2(1)     | 10(1)    | 5(1)     |
| C(6)  | 23(1)    | 22(1)    | 24(1)    | -1(1)    | 6(1)     | 1(1)     |
| C(7)  | 24(1)    | 22(1)    | 25(1)    | -1(1)    | 5(1)     | -4(1)    |
| C(8)  | 36(1)    | 26(1)    | 39(1)    | -7(1)    | 7(1)     | -7(1)    |
| C(9)  | 40(1)    | 37(1)    | 44(1)    | -10(1)   | 3(1)     | -18(1)   |
| C(10) | 27(1)    | 45(1)    | 41(1)    | -3(1)    | 0(1)     | -14(1)   |
| C(11) | 20(1)    | 35(1)    | 35(1)    | 1(1)     | 2(1)     | -5(1)    |
| C(12) | 21(1)    | 24(1)    | 23(1)    | 1(1)     | 3(1)     | -3(1)    |
| N(13) | 18(1)    | 21(1)    | 24(1)    | 1(1)     | 4(1)     | -1(1)    |
| S(14) | 20(1)    | 23(1)    | 26(1)    | 0(1)     | 5(1)     | 3(1)     |
| O(14) | 36(1)    | 22(1)    | 38(1)    | -6(1)    | 6(1)     | 3(1)     |
| O(15) | 22(1)    | 44(1)    | 35(1)    | 4(1)     | 11(1)    | 5(1)     |
| C(17) | 21(1)    | 25(1)    | 22(1)    | 1(1)     | 5(1)     | 1(1)     |
| C(18) | 28(1)    | 28(1)    | 27(1)    | 4(1)     | 7(1)     | -3(1)    |
| C(19) | 40(1)    | 27(1)    | 29(1)    | 6(1)     | 8(1)     | 0(1)     |
| C(20) | 35(1)    | 34(1)    | 30(1)    | 8(1)     | 5(1)     | 10(1)    |
| C(21) | 25(1)    | 39(1)    | 30(1)    | 2(1)     | 1(1)     | 4(1)     |
| C(22) | 24(1)    | 26(1)    | 25(1)    | -2(1)    | 3(1)     | 0(1)     |
| N(23) | 25(1)    | 31(1)    | 41(1)    | -5(1)    | -3(1)    | -4(1)    |

|        |       |       |       |        |       |        |
|--------|-------|-------|-------|--------|-------|--------|
| O(24)  | 62(1) | 47(1) | 52(1) | -24(1) | 0(1)  | -9(1)  |
| O(25)  | 43(1) | 39(1) | 61(1) | 5(1)   | 13(1) | -13(1) |
| N(26)  | 28(1) | 26(1) | 31(1) | 6(1)   | 11(1) | 4(1)   |
| C(27)  | 28(1) | 48(1) | 53(1) | 20(1)  | 10(1) | 9(1)   |
| C(28)  | 39(1) | 73(1) | 63(1) | 30(1)  | 18(1) | 27(1)  |
| C(29)  | 72(2) | 50(1) | 53(1) | 24(1)  | 34(1) | 37(1)  |
| C(30)  | 80(2) | 26(1) | 54(1) | 9(1)   | 31(1) | 14(1)  |
| C(31)  | 49(1) | 25(1) | 41(1) | 2(1)   | 16(1) | 1(1)   |
| C(1S)  | 56(1) | 38(1) | 45(1) | 1(1)   | 15(1) | -5(1)  |
| Cl(1S) | 40(1) | 73(1) | 73(1) | -19(1) | 11(1) | -6(1)  |
| Cl(2S) | 44(1) | 66(1) | 70(1) | 12(1)  | 18(1) | 6(1)   |

---

Table 5. Hydrogen coordinates ( $\times 10^4$ ) and isotropic displacement parameters ( $\text{\AA}^2 \times 10^3$ ) for compound **11**.

|       | x    | y     | z    | U(eq) |
|-------|------|-------|------|-------|
| H(2)  | 4566 | 9257  | 2801 | 33    |
| H(3)  | 5458 | 7686  | 3237 | 40    |
| H(4)  | 4775 | 5930  | 3269 | 42    |
| H(5)  | 3211 | 5806  | 2869 | 37    |
| H(8)  | 1993 | 5797  | 1727 | 40    |
| H(9)  | 451  | 5532  | 1343 | 49    |
| H(10) | -509 | 6944  | 1650 | 46    |
| H(11) | 79   | 8654  | 2301 | 37    |
| H(18) | 1612 | 7335  | 4449 | 33    |
| H(19) | 2623 | 5941  | 5112 | 38    |
| H(20) | 4139 | 6360  | 5650 | 40    |
| H(21) | 4636 | 8215  | 5635 | 38    |
| H(27) | 790  | 10475 | 1315 | 51    |
| H(28) | -25  | 11986 | 538  | 68    |
| H(29) | 686  | 13707 | 471  | 66    |
| H(30) | 2193 | 13881 | 1218 | 61    |
| H(31) | 2976 | 12327 | 1952 | 45    |
| H(2S) | 2946 | 2473  | 4497 | 55    |
| H(1S) | 3220 | 3580  | 5137 | 55    |

Table 6. Torsion angles [°] for compound **11**.

|                         |             |                         |             |
|-------------------------|-------------|-------------------------|-------------|
| F(1)-Pd(1)-N(1)-C(2)    | 36.39(10)   | C(8)-C(7)-C(12)-N(13)   | -176.17(13) |
| N(13)-Pd(1)-N(1)-C(2)   | -145.00(10) | C(6)-C(7)-C(12)-N(13)   | 6.2(2)      |
| F(1)-Pd(1)-N(1)-C(6)    | -142.81(10) | C(11)-C(12)-N(13)-S(14) | 77.79(14)   |
| N(13)-Pd(1)-N(1)-C(6)   | 35.81(11)   | C(7)-C(12)-N(13)-S(14)  | -104.68(13) |
| C(6)-N(1)-C(2)-C(3)     | 0.2(2)      | C(11)-C(12)-N(13)-Pd(1) | -133.30(11) |
| Pd(1)-N(1)-C(2)-C(3)    | -179.04(11) | C(7)-C(12)-N(13)-Pd(1)  | 44.23(14)   |
| N(1)-C(2)-C(3)-C(4)     | -0.6(2)     | N(1)-Pd(1)-N(13)-C(12)  | -56.02(9)   |
| C(2)-C(3)-C(4)-C(5)     | -0.1(2)     | N(26)-Pd(1)-N(13)-C(12) | 119.86(9)   |
| C(3)-C(4)-C(5)-C(6)     | 1.2(2)      | N(1)-Pd(1)-N(13)-S(14)  | 92.02(7)    |
| C(2)-N(1)-C(6)-C(5)     | 1.0(2)      | N(26)-Pd(1)-N(13)-S(14) | -92.10(7)   |
| Pd(1)-N(1)-C(6)-C(5)    | -179.84(10) | C(12)-N(13)-S(14)-O(14) | -178.41(10) |
| C(2)-N(1)-C(6)-C(7)     | -178.91(12) | Pd(1)-N(13)-S(14)-O(14) | 34.92(9)    |
| Pd(1)-N(1)-C(6)-C(7)    | 0.26(17)    | C(12)-N(13)-S(14)-O(15) | -47.29(11)  |
| C(4)-C(5)-C(6)-N(1)     | -1.7(2)     | Pd(1)-N(13)-S(14)-O(15) | 166.04(7)   |
| C(4)-C(5)-C(6)-C(7)     | 178.20(14)  | C(12)-N(13)-S(14)-C(17) | 65.75(11)   |
| N(1)-C(6)-C(7)-C(8)     | 150.72(14)  | Pd(1)-N(13)-S(14)-C(17) | -80.92(8)   |
| C(5)-C(6)-C(7)-C(8)     | -29.2(2)    | O(14)-S(14)-C(17)-C(22) | -20.39(14)  |
| N(1)-C(6)-C(7)-C(12)    | -31.7(2)    | O(15)-S(14)-C(17)-C(22) | -148.32(12) |
| C(5)-C(6)-C(7)-C(12)    | 148.40(14)  | N(13)-S(14)-C(17)-C(22) | 95.00(13)   |
| C(12)-C(7)-C(8)-C(9)    | -1.6(2)     | O(14)-S(14)-C(17)-C(18) | 167.70(11)  |
| C(6)-C(7)-C(8)-C(9)     | 176.07(15)  | O(15)-S(14)-C(17)-C(18) | 39.76(13)   |
| C(7)-C(8)-C(9)-C(10)    | 0.4(3)      | N(13)-S(14)-C(17)-C(18) | -76.91(12)  |
| C(8)-C(9)-C(10)-C(11)   | 1.1(3)      | C(22)-C(17)-C(18)-C(19) | -2.4(2)     |
| C(9)-C(10)-C(11)-C(12)  | -1.4(3)     | S(14)-C(17)-C(18)-C(19) | 170.11(11)  |
| C(10)-C(11)-C(12)-C(7)  | 0.1(2)      | C(17)-C(18)-C(19)-C(20) | -0.3(2)     |
| C(10)-C(11)-C(12)-N(13) | 177.69(14)  | C(18)-C(19)-C(20)-C(21) | 2.6(2)      |
| C(8)-C(7)-C(12)-C(11)   | 1.3(2)      | C(19)-C(20)-C(21)-C(22) | -2.2(2)     |
| C(6)-C(7)-C(12)-C(11)   | -176.26(13) | C(20)-C(21)-C(22)-C(17) | -0.6(2)     |

|                         |             |
|-------------------------|-------------|
| C(20)-C(21)-C(22)-N(23) | 177.62(14)  |
| C(18)-C(17)-C(22)-C(21) | 2.8(2)      |
| S(14)-C(17)-C(22)-C(21) | -169.05(12) |
| C(18)-C(17)-C(22)-N(23) | -175.30(13) |
| S(14)-C(17)-C(22)-N(23) | 12.8(2)     |
| C(21)-C(22)-N(23)-O(24) | -87.84(18)  |
| C(17)-C(22)-N(23)-O(24) | 90.41(18)   |
| C(21)-C(22)-N(23)-O(25) | 90.40(18)   |
| C(17)-C(22)-N(23)-O(25) | -91.35(19)  |
| F(1)-Pd(1)-N(26)-C(31)  | -37.49(12)  |
| N(13)-Pd(1)-N(26)-C(31) | 143.91(12)  |
| F(1)-Pd(1)-N(26)-C(27)  | 133.99(13)  |
| N(13)-Pd(1)-N(26)-C(27) | -44.60(13)  |
| C(31)-N(26)-C(27)-C(28) | 1.1(3)      |
| Pd(1)-N(26)-C(27)-C(28) | -170.47(16) |
| N(26)-C(27)-C(28)-C(29) | -0.6(3)     |
| C(27)-C(28)-C(29)-C(30) | -0.8(3)     |
| C(28)-C(29)-C(30)-C(31) | 1.5(3)      |
| C(27)-N(26)-C(31)-C(30) | -0.4(3)     |
| Pd(1)-N(26)-C(31)-C(30) | 171.30(14)  |
| C(29)-C(30)-C(31)-N(26) | -1.0(3)     |

---



## Computational Method Details

Calculations were performed using density functional theory (DFT) with the M06 functional, as implemented in Jaguar 7.6 release 110.<sup>20</sup> All calculations used the Hay and Wadt small core-valence relativistic effective-core-potential (ECP).<sup>21</sup> The LACV3P\*\* basis set was used for Pd and the 6-311G\*\* basis set was used for F for all geometry optimizations and LACV3P+\*\*\* (2f) and 6-311++G\*\* basis sets for energies. LACV3P+\*\*\* (2f) utilizes the LACV3P+\*\*\* basis set as implemented in Jaguar plus a double-zeta f-shell with exponents from Martin and Sundermann.<sup>22</sup> All electrons were described for all other atoms using the 6-31G\*\* or 6-311++G\*\* basis sets for geometry optimizations and energies, respectively.<sup>23,24</sup> For each optimized structure, the M06 analytic Hessian was calculated to obtain the vibrational frequencies, which in turn were used to obtain the zero point energies and free energy corrections (without translational or rotational components). Solvent corrections were based on single point self-consistent Poisson-Boltzmann continuum solvation calculations for MeCN ( $\epsilon = 37.5$  and  $R_0 = 2.18 \text{ \AA}$ ) using the PBF<sup>25</sup> module in Jaguar. Natural population analyses were obtained from NBO 5.0<sup>26</sup> as implemented in Jaguar.

---

<sup>20</sup> Jaguar 7.6, Schrodinger, LLC, New York, NY (2006).

<sup>21</sup> Hay, P. J.; Wadt, W. R. *J. Chem. Phys.* **1985**, *82*, 299–310.

<sup>22</sup> Martin, J. M. L.; Sundermann, A. *J. Chem. Phys.* **2001**, *114*, 3408–3420.

<sup>23</sup> Krishnan, R.; Binkley, J. S.; Seeger, R.; Pople, J. A. *J. Chem. Phys.* **1980**, *72*, 650–654.

<sup>24</sup> Frisch, M. J.; Pople, J. A.; Binkley, J. S. *J. Chem. Phys.* **1984**, *80*, 3265–3269.

<sup>25</sup> Tannor, D. J. *et al. J. Am. Chem. Soc.* **1994**, *116*, 11875–11882.

<sup>26</sup> (a) *NBO 5.0*. E. D. Glendening, J. K. Badenhoop, A. E. Reed, J. E. Carpenter, J. A. Bohmann, C. M. Morales, and F. Weinhold, Theoretical Chemistry Institute, University of Wisconsin, Madison (2001); (b) Reed, A. E.; Curtiss, L. A.; Weinhold, F. *Chem. Rev.* **1988**, *88*, 899–926.

**Structural Validation for 3. Calculated structure is overlaid in yellow.**

|          |                      |                    |                |           |
|----------|----------------------|--------------------|----------------|-----------|
|          | Structural Parameter | Experiment (X-ray) | M06 calculated | Deviation |
|          | Pd–C                 | 2.008(5) Å         | 2.035 Å        | +0.027 Å  |
|          | Pd–N1                | 2.012(5) Å         | 2.032 Å        | +0.020 Å  |
|          | Pd–F1                | 1.955(3) Å         | 2.000 Å        | +0.045 Å  |
|          | Pd–F2                | 2.039(3) Å         | 2.089 Å        | +0.050 Å  |
|          | Pd–N2                | 2.027(5) Å         | 2.052 Å        | +0.025 Å  |
|          | Pd–N3                | 2.020(4) Å         | 2.051 Å        | +0.031 Å  |
|          | F1–Pd–F2             | 88.3(13)°          | 87.8°          | –0.5°     |
|          | C–Pd–F1              | 87.7(18)°          | 86.5°          | –1.2°     |
|          | C–Pd–F2              | 173.0(18)°         | 170.2°         | –2.8°     |
|          | N1–Pd–N2             | 175.9(18)°         | 176.0°         | +0.1°     |
| N2–Pd–N3 | 87.7(18)°            | 87.8°              | +0.1°          |           |

**Natural charges for transition states**

| Complex              | Natural charge on Pd | Natural charge on F1 | Natural charge on C |
|----------------------|----------------------|----------------------|---------------------|
| <b>1</b>             | 1.07                 | -0.62                | -0.13               |
| <b>1<sup>‡</sup></b> | 0.93                 | -0.51                | 0.32                |
| <b>2</b>             | 1.06                 | -0.63                | 0.12                |
| <b>2<sup>‡</sup></b> | 0.95                 | -0.51                | 0.32                |

**Hammett plot calculations**

(\*values are below the accuracy of the method)

| Complex                       | ( $\Delta E^\ddagger$ kcal mol <sup>-1</sup> ) relative to unsubstituted complexes <b>1</b> and <b>2</b> |
|-------------------------------|----------------------------------------------------------------------------------------------------------|
| <b>7a</b> (CF <sub>3</sub> )  | < - 0.1* relative to <b>1</b>                                                                            |
| <b>7e</b> (OMe)               | + 0.2* relative to <b>1</b>                                                                              |
| <b>8a</b> (NO <sub>2</sub> )  | - 0.6* relative to <b>1</b>                                                                              |
| <b>8g</b> (OMe)               | + 0.2* relative to <b>1</b>                                                                              |
| <b>10a</b> (NO <sub>2</sub> ) | + 2.7 relative to <b>2</b>                                                                               |
| <b>10g</b> (OMe)              | + 3.1 relative to <b>2</b>                                                                               |

**Bond distances in the transition states of reductive elimination from **2**, **10a**, and **10g**.**

|              | <b>2<sup>‡</sup></b> | <b>10a<sup>‡</sup></b> ; 7-NO <sub>2</sub> | <b>10g<sup>‡</sup></b> ; 7-OMe |
|--------------|----------------------|--------------------------------------------|--------------------------------|
| Pd-N(py) [Å] | 2.47                 | 2.42                                       | 2.46                           |
| Pd-F [Å]     | 2.11                 | 2.13                                       | 2.11                           |
| Pd-C [Å]     | 2.19                 | 2.15                                       | 2.20                           |

**Selected metrical parameters of calculated structures**

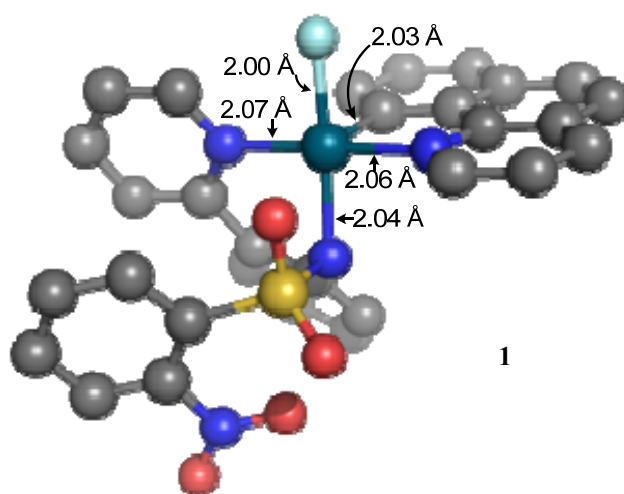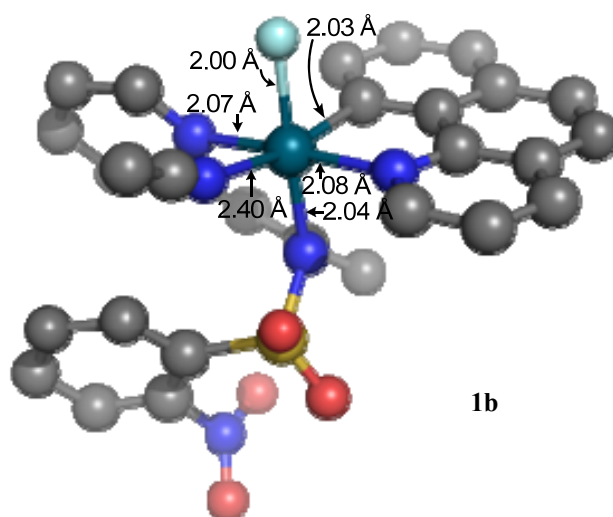

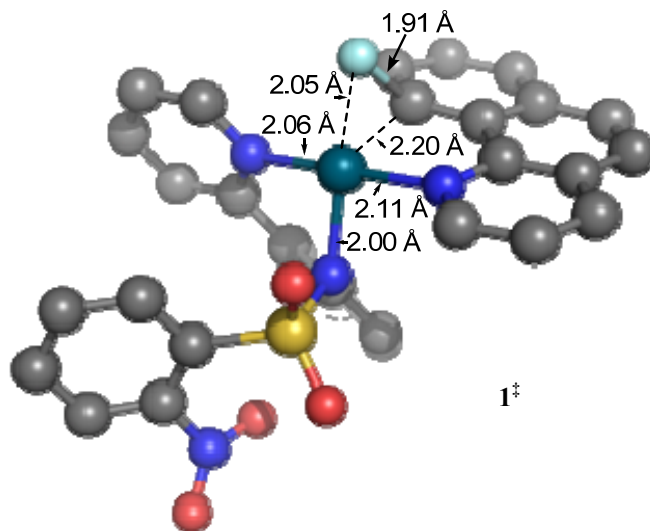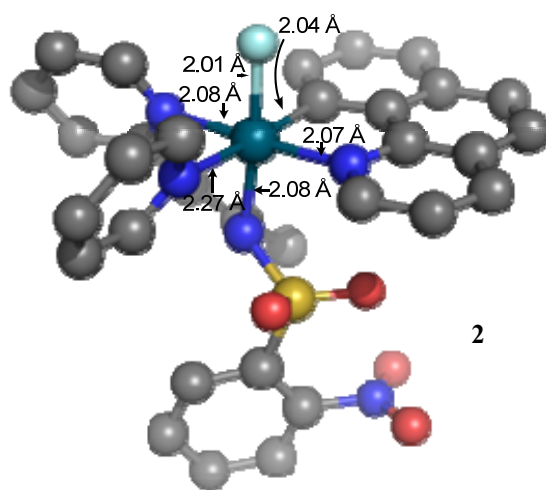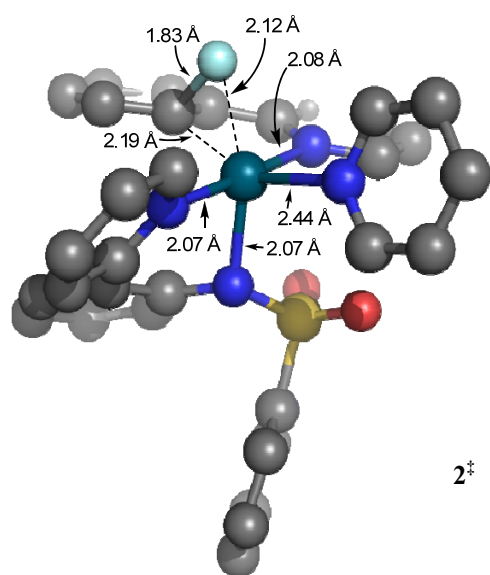

Electrostatic potential (blue is  $\delta^+$ , red is  $\delta^-$ ) and highest occupied molecular orbital for **1** and **1<sup>‡</sup>**.

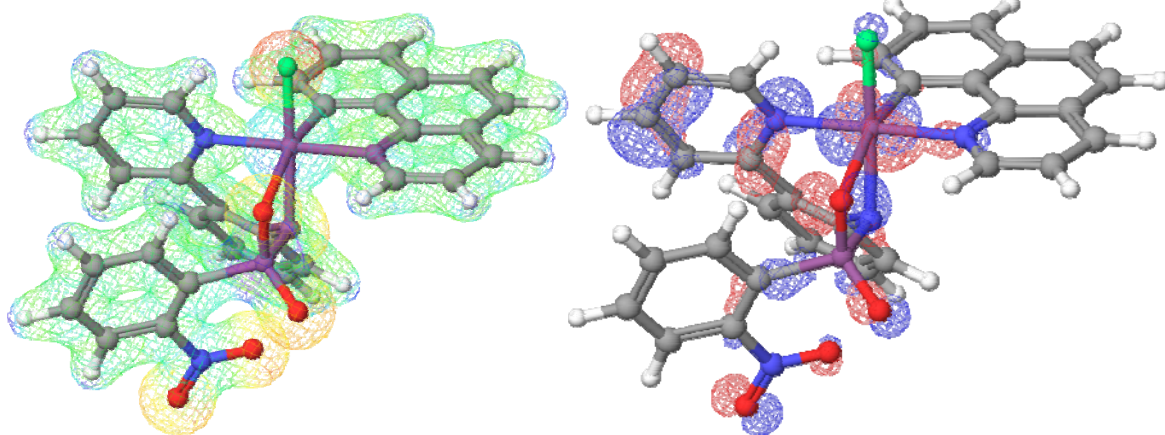

**1**

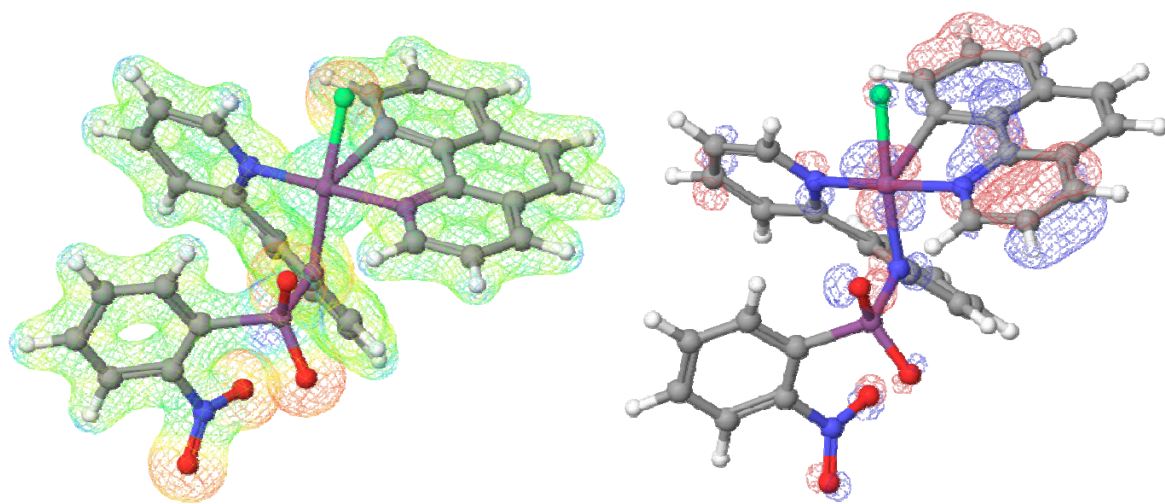

**1<sup>‡</sup>**

## XYZ coordinates from M06 geometry optimizations

**1**

|     |               |               |              |
|-----|---------------|---------------|--------------|
| Pd1 | 3.3732818317  | 1.6272401567  | 2.7398142381 |
| F2  | 3.7390168497  | 2.2863259627  | 0.8897085553 |
| N4  | 3.8333685658  | 3.4862221353  | 3.5263096727 |
| C5  | 4.6677647627  | 4.2137149947  | 2.7625933956 |
| H6  | 4.8368116853  | 3.8200436526  | 1.7596832460 |
| C7  | 5.2272700071  | 5.3899760115  | 3.2274120475 |
| H8  | 5.8832130328  | 5.9643365322  | 2.5812736959 |
| C9  | 4.9278785846  | 5.7984598510  | 4.5222540216 |
| H10 | 5.3663308211  | 6.7060560183  | 4.9296610330 |
| C11 | 4.0683099029  | 5.0371208698  | 5.2977564632 |
| H12 | 3.8460845304  | 5.3211785726  | 6.3224479758 |
| C13 | 3.4981271900  | 3.8694756101  | 4.7828113734 |
| C14 | 2.5081642953  | 3.1078739599  | 5.5663482166 |
| C15 | 1.6156735116  | 3.8132131459  | 6.3840068249 |
| H16 | 1.6782089979  | 4.8982450524  | 6.4359080963 |
| C17 | 0.6120373796  | 3.1574653406  | 7.0817925853 |
| H18 | -0.0730957682 | 3.7296198851  | 7.7014785090 |
| C19 | 0.4672355527  | 1.7774275131  | 6.9642279953 |
| H20 | -0.3229432607 | 1.2611262319  | 7.5020076304 |
| C21 | 1.3353923870  | 1.0613673451  | 6.1547363470 |
| H22 | 1.2675842760  | -0.0187928606 | 6.0588717006 |
| C23 | 2.3699950225  | 1.7074734514  | 5.4782664651 |
| N24 | 3.1964491003  | 0.9192927199  | 4.6468765866 |
| S25 | 4.7902857981  | 0.5190038239  | 4.9449785325 |
| O26 | 5.3622833623  | 0.7706583154  | 3.5830069326 |
| O27 | 4.9691447377  | -0.8170317060 | 5.4635156427 |
| C28 | 5.6252629628  | 1.7322381047  | 6.0096362251 |
| C29 | 6.6453719286  | 2.4396717511  | 5.3791344507 |
| H30 | 6.8407990179  | 2.2527820797  | 4.3273069173 |
| C31 | 7.4145652032  | 3.3614080950  | 6.0852206242 |
| H32 | 8.2098172869  | 3.8942250876  | 5.5701836695 |
| C33 | 7.1737125094  | 3.5919869960  | 7.4319152230 |
| H34 | 7.7725296225  | 4.3083583998  | 7.9871488859 |
| C35 | 6.1671829750  | 2.8847120557  | 8.0790791134 |
| H36 | 5.9566136612  | 3.0227863260  | 9.1352362156 |
| C37 | 5.4085547372  | 1.9612866751  | 7.3775316247 |
| N38 | 4.3769763513  | 1.2417810390  | 8.1420434544 |
| O39 | 4.2701630647  | 1.4887129569  | 9.3266821113 |
| O40 | 3.6972461964  | 0.4399643691  | 7.5228581524 |

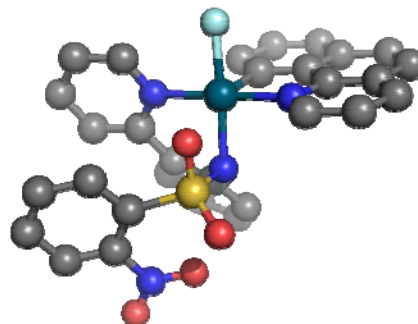

|     |               |               |              |
|-----|---------------|---------------|--------------|
| N41 | 2.8873016157  | -0.2310460348 | 1.9875116883 |
| C42 | 3.6850992649  | -1.2821206246 | 1.8618200655 |
| H43 | 4.7103676666  | -1.1654695306 | 2.2064029216 |
| C44 | 3.1971452215  | -2.4770262473 | 1.3189255497 |
| H45 | 3.8676199098  | -3.3255315749 | 1.2293274332 |
| C46 | 1.8795270231  | -2.5596855646 | 0.9147799088 |
| H47 | 1.4898304398  | -3.4845373937 | 0.4939721994 |
| C48 | 1.0298059605  | -1.4462827322 | 1.0482066508 |
| C49 | -0.3521950641 | -1.3990917866 | 0.6728842496 |
| H50 | -0.8023554918 | -2.2914635481 | 0.2437707789 |
| C51 | -1.0904440589 | -0.2677936280 | 0.8447474471 |
| H52 | -2.1378264798 | -0.2511040554 | 0.5513578236 |
| C53 | -0.5265515618 | 0.9262638258  | 1.4052113122 |
| C54 | -1.2303926123 | 2.1317666767  | 1.5966731772 |
| H55 | -2.2779563685 | 2.1881613624  | 1.3108024629 |
| C56 | -0.5980873995 | 3.2353963021  | 2.1288213397 |
| H57 | -1.1511431114 | 4.1624667833  | 2.2596143647 |
| C58 | 0.7655634040  | 3.2110581711  | 2.5065525981 |
| H59 | 1.2401995100  | 4.1038581146  | 2.9024271283 |
| C60 | 1.4298552986  | 2.0310409112  | 2.3360168262 |
| C61 | 0.8303043956  | 0.8922572335  | 1.7845823514 |
| C62 | 1.5908069171  | -0.2858281326 | 1.6000211060 |

**1b**

|     |               |              |              |
|-----|---------------|--------------|--------------|
| Pd1 | 3.5282646213  | 1.8638575860 | 2.5227180955 |
| F2  | 3.6762893880  | 2.6730557109 | 0.6946296565 |
| N3  | 3.8751263365  | 3.7073805839 | 3.4009559319 |
| C4  | 4.7069389465  | 4.5060263057 | 2.7083244324 |
| H5  | 4.9115461921  | 4.1848110199 | 1.6882780374 |
| C6  | 5.2156752219  | 5.6668629029 | 3.2577173239 |
| H7  | 5.8668004543  | 6.3024563425 | 2.6664914282 |
| C8  | 4.8707741477  | 5.9852165359 | 4.5678970511 |
| H9  | 5.2758371449  | 6.8743191494 | 5.0446907417 |
| C10 | 3.9979350082  | 5.1658159673 | 5.2616724473 |
| H11 | 3.7234781998  | 5.3842662251 | 6.2896543731 |
| C12 | 3.4666243348  | 4.0216800310 | 4.6561920212 |
| C13 | 2.4154855193  | 3.2440463308 | 5.3268973554 |
| C14 | 1.4537803530  | 3.9345197199 | 6.0749185267 |
| H15 | 1.5251096614  | 5.0156747766 | 6.1773981454 |
| C16 | 0.3739764818  | 3.2690395442 | 6.6341524528 |
| H17 | -0.3679081288 | 3.8258072615 | 7.2004301978 |
| C18 | 0.2318779668  | 1.8970233915 | 6.4484601268 |
| H19 | -0.6154523867 | 1.3722325707 | 6.8817402489 |

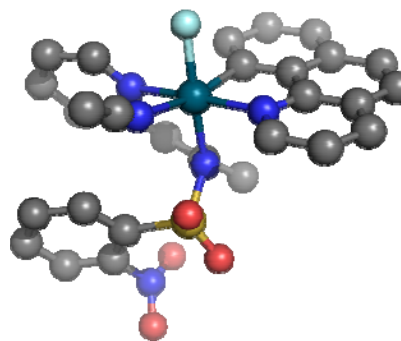

|     |               |               |              |
|-----|---------------|---------------|--------------|
| C20 | 1.1701087871  | 1.1963299332  | 5.7068778518 |
| H21 | 1.0915223162  | 0.1228327550  | 5.5576490499 |
| C22 | 2.2695020840  | 1.8544351247  | 5.1555434273 |
| N23 | 3.1931909129  | 1.1142671545  | 4.3892548623 |
| S24 | 4.3494227078  | 0.2469968289  | 5.2001065997 |
| O25 | 5.2278969578  | -0.3125505121 | 4.1838646459 |
| O26 | 3.6846178946  | -0.5996321925 | 6.1738915499 |
| C27 | 5.2999277235  | 1.4485177392  | 6.1374517130 |
| C28 | 6.3043788819  | 2.1456112201  | 5.4672821684 |
| H29 | 6.4919656688  | 1.9118214881  | 4.4220326447 |
| C30 | 7.0589794682  | 3.1044931413  | 6.1288433189 |
| H31 | 7.8355071503  | 3.6453662053  | 5.5937344635 |
| C32 | 6.8367717559  | 3.3556767139  | 7.4793249183 |
| H33 | 7.4348907764  | 4.0936886000  | 8.0073432964 |
| C34 | 5.8618655644  | 2.6456626297  | 8.1658944912 |
| H35 | 5.6890053827  | 2.8040878446  | 9.2277615264 |
| C36 | 5.0918022827  | 1.7105822906  | 7.4884773083 |
| N37 | 4.0587451558  | 1.0471904384  | 8.3098612680 |
| O38 | 4.4565069711  | 0.2332356659  | 9.1154003209 |
| O39 | 2.9170269166  | 1.4428044628  | 8.1664815797 |
| N40 | 3.0771221966  | -0.0232980222 | 1.7713124476 |
| C41 | 3.9064002120  | -1.0320765006 | 1.5476361813 |
| H42 | 4.9604923560  | -0.8492688338 | 1.7302482481 |
| C43 | 3.4200578893  | -2.2782042960 | 1.1355630472 |
| H44 | 4.1235081839  | -3.0861491939 | 0.9629304813 |
| C45 | 2.0623510102  | -2.4654009801 | 0.9743162996 |
| H46 | 1.6709618552  | -3.4321436969 | 0.6637413874 |
| C47 | 1.1737463913  | -1.4045243333 | 1.2228777293 |
| C48 | -0.2527184445 | -1.4709208707 | 1.1034571897 |
| H49 | -0.7020365313 | -2.4128441179 | 0.7966563765 |
| C50 | -1.0328368287 | -0.3863544572 | 1.3638038644 |
| H51 | -2.1143050038 | -0.4543259396 | 1.2631272035 |
| C52 | -0.4684919513 | 0.8675513142  | 1.7714553737 |
| C53 | -1.2143319487 | 2.0321863272  | 2.0366324486 |
| H54 | -2.2978471537 | 2.0036604768  | 1.9433387166 |
| C55 | -0.5810654774 | 3.2042313746  | 2.3930743773 |
| H56 | -1.1677973936 | 4.1018682890  | 2.5735822081 |
| C57 | 0.8235486091  | 3.2854980956  | 2.5371151031 |
| H58 | 1.2924565432  | 4.2239562060  | 2.8144929444 |
| C59 | 1.5250942647  | 2.1354606383  | 2.3234207568 |
| C60 | 0.9329580237  | 0.9394773325  | 1.9121123941 |
| C61 | 1.7391326964  | -0.1868365901 | 1.6287048599 |
| C62 | 6.8841622389  | 1.4449135698  | 1.5707639027 |



|     |              |              |               |
|-----|--------------|--------------|---------------|
| N63 | 5.8784537520 | 1.5906250279 | 2.1256023876  |
| C64 | 8.1424983476 | 1.2624950016 | 0.8786114618  |
| H65 | 8.7548418205 | 2.1640747362 | 0.9686743777  |
| H66 | 8.6898432692 | 0.4179931067 | 1.3064993255  |
| H67 | 7.9575940819 | 1.0701309997 | -0.1822543039 |

**1<sup>‡</sup>**

|     |               |               |              |
|-----|---------------|---------------|--------------|
| Pd1 | 3.3718843719  | 1.8447621453  | 2.8026686477 |
| F2  | 3.1317114810  | 2.8602076215  | 1.0351059520 |
| N3  | 3.6186547629  | 3.6071790332  | 3.8549759706 |
| C4  | 4.4038442373  | 4.5298696962  | 3.2691925159 |
| H5  | 4.7142546854  | 4.3098683429  | 2.2501393022 |
| C6  | 4.7601736436  | 5.6976490770  | 3.9147473120 |
| H7  | 5.3808373729  | 6.4290047501  | 3.4074416202 |
| C8  | 4.3037682463  | 5.8944810453  | 5.2153430432 |
| H9  | 4.5819446610  | 6.7885734392  | 5.7673718266 |
| C10 | 3.4931579021  | 4.9415213994  | 5.8067818475 |
| H11 | 3.1510461543  | 5.0623836759  | 6.8303001226 |
| C12 | 3.1267539444  | 3.7878306424  | 5.1039033631 |
| C13 | 2.2002251676  | 2.8103102491  | 5.6936232589 |
| C14 | 1.1870672371  | 3.2571645114  | 6.5482363442 |
| H15 | 1.0745112760  | 4.3222292069  | 6.7404598740 |
| C16 | 0.2910367283  | 2.3656459199  | 7.1202335782 |
| H17 | -0.4909929294 | 2.7360825571  | 7.7774486831 |
| C18 | 0.3820843615  | 1.0063326078  | 6.8366419081 |
| H19 | -0.3176689431 | 0.3064999740  | 7.2854644410 |
| C20 | 1.3660132736  | 0.5431908114  | 5.9768533478 |
| H21 | 1.4790790795  | -0.5144064189 | 5.7530142901 |
| C22 | 2.2879315667  | 1.4288349271  | 5.4223585189 |
| N23 | 3.2767963308  | 0.9050304024  | 4.5700139917 |
| S24 | 4.7681711039  | 0.3942700742  | 5.0763615239 |
| O25 | 5.5172590384  | 0.3490917212  | 3.8142825018 |
| O26 | 4.6412993338  | -0.7840361137 | 5.9074148448 |
| C27 | 5.5889950052  | 1.6760511109  | 6.0520239668 |
| C28 | 6.4427803404  | 2.5204079890  | 5.3451465267 |
| H29 | 6.5442510843  | 2.3803737841  | 4.2717653367 |
| C30 | 7.1901951959  | 3.4900159390  | 6.0040896507 |
| H31 | 7.8455917002  | 4.1420991145  | 5.4322378214 |
| C32 | 7.1269116670  | 3.5978585799  | 7.3872087221 |
| H33 | 7.7242449564  | 4.3394750031  | 7.9104496864 |
| C34 | 6.3160436245  | 2.7331465077  | 8.1109043487 |
| H35 | 6.2713091425  | 2.7687232887  | 9.1957198089 |
| C36 | 5.5416496926  | 1.7956656785  | 7.4448527661 |

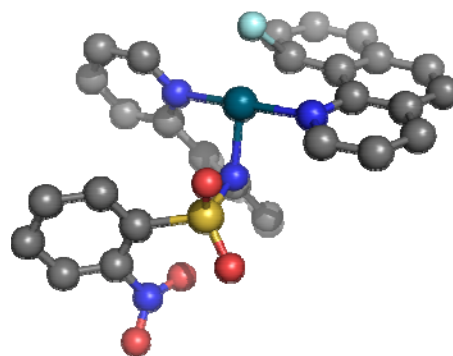

|     |               |               |               |
|-----|---------------|---------------|---------------|
| N37 | 4.6663362194  | 0.9787368320  | 8.3038450002  |
| O38 | 5.1466831768  | 0.5713470713  | 9.3417366270  |
| O39 | 3.5148642991  | 0.8316214450  | 7.9347134768  |
| N40 | 3.0242005083  | 0.0475876713  | 1.7804827103  |
| C41 | 3.8247229842  | -1.0063409476 | 1.6857171640  |
| H42 | 4.8131731819  | -0.9028601359 | 2.1269111829  |
| C43 | 3.3845085901  | -2.1960744111 | 1.0919722216  |
| H44 | 4.0680104273  | -3.0365966277 | 1.0278498086  |
| C45 | 2.0831884893  | -2.2945738875 | 0.6483908970  |
| H46 | 1.7097414983  | -3.2260669920 | 0.2273366505  |
| C47 | 1.2191762453  | -1.1892312161 | 0.7578101913  |
| C48 | -0.1679479990 | -1.2028053047 | 0.4046411647  |
| H49 | -0.5870605552 | -2.1189630209 | -0.0057217243 |
| C50 | -0.9570595979 | -0.1146654177 | 0.6129036259  |
| H51 | -2.0191569670 | -0.1547080871 | 0.3818382698  |
| C52 | -0.4272648408 | 1.1111239024  | 1.1324128937  |
| C53 | -1.2043881721 | 2.2615874554  | 1.3764592502  |
| H54 | -2.2702071446 | 2.2334540066  | 1.1619846410  |
| C55 | -0.6290180413 | 3.4144355376  | 1.8687071698  |
| H56 | -1.2416293630 | 4.2945812011  | 2.0469405971  |
| C57 | 0.7616362122  | 3.5107201836  | 2.0971438672  |
| H58 | 1.2351230298  | 4.4462862898  | 2.3757824803  |
| C59 | 1.4668042587  | 2.3653650892  | 1.8976617203  |
| C60 | 0.9560855898  | 1.1559119030  | 1.4236751617  |
| C61 | 1.7557309017  | -0.0101421968 | 1.3005054593  |

**2**

|     |              |              |              |
|-----|--------------|--------------|--------------|
| Pd1 | 3.5325815628 | 1.9402599083 | 2.5654089398 |
| F2  | 3.6343885140 | 2.4372263248 | 0.6188894811 |
| N3  | 3.8185885030 | 3.9334477872 | 3.1079095816 |
| C4  | 4.5334283508 | 4.6433478637 | 2.2167706048 |
| H5  | 4.6355090386 | 4.1824331962 | 1.2352576122 |
| C6  | 5.0678545745 | 5.8769157676 | 2.5335250443 |
| H7  | 5.6259547252 | 6.4296281767 | 1.7848586920 |
| C8  | 4.8810823651 | 6.3664745950 | 3.8219705097 |
| H9  | 5.3207632117 | 7.3143612405 | 4.1217828178 |
| C10 | 4.1227339775 | 5.6393618606 | 4.7227156474 |
| H11 | 3.9677873858 | 5.9983507198 | 5.7358070582 |
| C12 | 3.5571920532 | 4.4150664757 | 4.3484356302 |
| C13 | 2.6049997528 | 3.7246081143 | 5.2271524359 |
| C14 | 1.7044998553 | 4.5090205157 | 5.9572869906 |
| H15 | 1.7752738173 | 5.5931909849 | 5.8965151951 |
| C16 | 0.6879973533 | 3.9333513664 | 6.7039289131 |

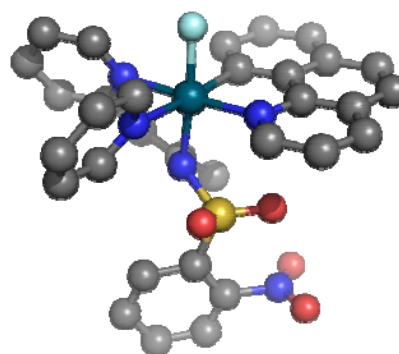

|     |               |               |               |
|-----|---------------|---------------|---------------|
| H17 | -0.0042183993 | 4.5612781262  | 7.2574837158  |
| C18 | 0.5395204353  | 2.5496255619  | 6.6913734300  |
| H19 | -0.2727743381 | 2.0771934395  | 7.2384969178  |
| C20 | 1.4092614429  | 1.7507393992  | 5.9657361862  |
| H21 | 1.2395591283  | 0.6790359865  | 5.9393013032  |
| C22 | 2.4822254749  | 2.3146399968  | 5.2639810638  |
| N23 | 3.4783490667  | 1.5704857727  | 4.6077314336  |
| S24 | 3.6899090483  | -0.0610066930 | 4.9999802987  |
| O25 | 4.9817683391  | -0.4187511136 | 4.4315110997  |
| O26 | 2.5216215667  | -0.8777025920 | 4.6945301357  |
| C27 | 3.8801617669  | 0.0111463109  | 6.7756388435  |
| C28 | 4.8887205569  | 0.8225511951  | 7.2904732976  |
| H29 | 5.5108857074  | 1.3925301852  | 6.6050215522  |
| C30 | 5.0910534712  | 0.9026548858  | 8.6599488606  |
| H31 | 5.8787458274  | 1.5382966047  | 9.0547884659  |
| C32 | 4.2845559011  | 0.1696621539  | 9.5252606191  |
| H33 | 4.4373678845  | 0.2322479556  | 10.5992156588 |
| C34 | 3.2831714145  | -0.6496690095 | 9.0228749053  |
| H35 | 2.6465056059  | -1.2338647699 | 9.6827204193  |
| C36 | 3.0959994479  | -0.7312302353 | 7.6514507481  |
| N37 | 2.0314379641  | -1.6557155898 | 7.2083582078  |
| O38 | 2.3805695069  | -2.7682627133 | 6.8822410445  |
| O39 | 0.8899340006  | -1.2347665314 | 7.2858011595  |
| N40 | 3.2121678577  | -0.0118812068 | 1.9438855111  |
| C41 | 4.1252085470  | -0.9501343465 | 1.7244607832  |
| H42 | 5.1607235118  | -0.6906832291 | 1.9195157889  |
| C43 | 3.7493274841  | -2.2292472864 | 1.3085179883  |
| H44 | 4.5189510670  | -2.9777984621 | 1.1512147191  |
| C45 | 2.4132675188  | -2.5230578775 | 1.1252452186  |
| H46 | 2.1054553011  | -3.5196486250 | 0.8160679835  |
| C47 | 1.4407650683  | -1.5334073631 | 1.3405655165  |
| C48 | 0.0290011561  | -1.7142690412 | 1.1793343839  |
| H49 | -0.3329803977 | -2.6908992847 | 0.8655894657  |
| C50 | -0.8418102767 | -0.6951968062 | 1.4123390122  |
| H51 | -1.9110576782 | -0.8497086008 | 1.2819669614  |
| C52 | -0.3896682928 | 0.6001691347  | 1.8292403142  |
| C53 | -1.2348218948 | 1.7015249058  | 2.0659033076  |
| H54 | -2.3091280539 | 1.5862798953  | 1.9395446845  |
| C55 | -0.7056034978 | 2.9191858418  | 2.4410432493  |
| H56 | -1.3677897496 | 3.7660369797  | 2.6058871181  |
| C57 | 0.6837954401  | 3.1100210653  | 2.6171088105  |
| H58 | 1.0635254201  | 4.0854223720  | 2.9081336870  |
| C59 | 1.4991176803  | 2.0304570840  | 2.4148526163  |

|     |              |               |              |
|-----|--------------|---------------|--------------|
| C60 | 0.9965603939 | 0.7892999369  | 2.0070441545 |
| C61 | 1.8949586896 | -0.2724307551 | 1.7551342725 |
| C62 | 8.5590296516 | 1.7737876680  | 2.2859811838 |
| C63 | 7.9470646086 | 1.9854791374  | 3.5163299133 |
| C64 | 6.5625813710 | 2.0052971236  | 3.5735605479 |
| N65 | 5.8034186577 | 1.8343419373  | 2.4860629787 |
| C66 | 6.3882556957 | 1.6531720509  | 1.2933741340 |
| C67 | 7.7680860490 | 1.6077092202  | 1.1551246392 |
| H68 | 9.6430675242 | 1.7437281674  | 2.2090654548 |
| H69 | 8.5319337476 | 2.1278504843  | 4.4201689264 |
| H70 | 6.0218869041 | 2.1607141159  | 4.5059510607 |
| H71 | 5.7096187929 | 1.5654606050  | 0.4443297354 |
| H72 | 8.2090767834 | 1.4505023701  | 0.1753735179 |

**2<sup>‡</sup>**

|     |               |               |               |
|-----|---------------|---------------|---------------|
| Pd1 | 3.6165377288  | 1.9355267606  | 2.6704617279  |
| F2  | 2.9564464356  | 2.6162562623  | 0.7829947790  |
| N3  | 3.9124829278  | 3.8747674420  | 3.3406342625  |
| C4  | 4.7752023850  | 4.6246814941  | 2.6356280705  |
| H5  | 5.1552535939  | 4.1804480103  | 1.7193683527  |
| C6  | 5.1425438129  | 5.8927833580  | 3.0412043525  |
| H7  | 5.8268096701  | 6.4779980068  | 2.4357111742  |
| C8  | 4.6155307545  | 6.3790518613  | 4.2338644380  |
| H9  | 4.9002768099  | 7.3613253120  | 4.6019483711  |
| C10 | 3.7245611344  | 5.6014224595  | 4.9521488248  |
| H11 | 3.3191255130  | 5.9514078518  | 5.8967763148  |
| C12 | 3.3495061464  | 4.3378482643  | 4.4809475235  |
| C13 | 2.3112114516  | 3.5513413918  | 5.1562806391  |
| C14 | 1.2248431273  | 4.2273950687  | 5.7174170308  |
| H15 | 1.1851852914  | 5.3132844061  | 5.6563516036  |
| C16 | 0.1735660031  | 3.5369605502  | 6.3008762379  |
| H17 | -0.6651310245 | 4.0800160706  | 6.7277252390  |
| C18 | 0.1914306190  | 2.1463465705  | 6.2998072994  |
| H19 | -0.6321466940 | 1.5852994430  | 6.7351294114  |
| C20 | 1.2481911209  | 1.4497127521  | 5.7327741367  |
| H21 | 1.2199794233  | 0.3650980264  | 5.7234834572  |
| C22 | 2.3439124119  | 2.1338799179  | 5.1885077583  |
| N23 | 3.5060183958  | 1.5178719829  | 4.6914999388  |
| S24 | 3.8474323564  | -0.0726394804 | 5.1060321095  |
| O25 | 5.1868892181  | -0.3152381429 | 4.5882899597  |
| O26 | 2.7781717087  | -1.0071607333 | 4.7719162001  |
| C27 | 3.9388979843  | 0.0754338988  | 6.8844280591  |
| C28 | 4.8266577235  | 1.0166468546  | 7.4024017385  |
| H29 | 5.4320281046  | 1.6038492127  | 6.7156414487  |
| C30 | 4.9183820256  | 1.2090777819  | 8.7727628022  |
| H31 | 5.6121693071  | 1.9443642164  | 9.1709863967  |
| C32 | 4.1152838367  | 0.4673715163  | 9.6339587873  |
| H33 | 4.1766787274  | 0.6227881513  | 10.7077099296 |
| C34 | 3.2306601113  | -0.4754576102 | 9.1287040157  |

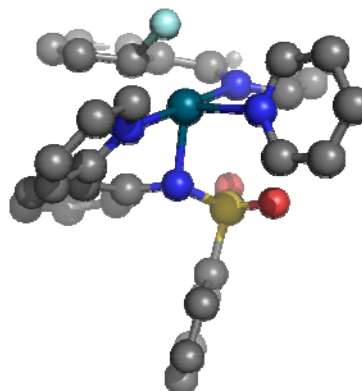

|     |               |               |               |
|-----|---------------|---------------|---------------|
| H35 | 2.5956653593  | -1.0640542173 | 9.7861318329  |
| C36 | 3.1595006274  | -0.6741894801 | 7.7582244199  |
| N37 | 2.2231847158  | -1.7260027065 | 7.3114599790  |
| O38 | 2.7053626088  | -2.8004340328 | 7.0296181545  |
| O39 | 1.0393033259  | -1.4346352136 | 7.3363330304  |
| N40 | 3.2216099934  | 0.0164136867  | 1.9758420450  |
| C41 | 4.0712538313  | -1.0005748713 | 1.8801327227  |
| H42 | 5.1096387148  | -0.7916875054 | 2.1215241658  |
| C43 | 3.6252454804  | -2.2858245728 | 1.5614297769  |
| H44 | 4.3461812101  | -3.0943756569 | 1.4997001844  |
| C45 | 2.2743195884  | -2.5149511124 | 1.4012072750  |
| H46 | 1.9022802044  | -3.5208468700 | 1.2165596078  |
| C47 | 1.3644223985  | -1.4486224051 | 1.4954973223  |
| C48 | -0.0598565185 | -1.5813470994 | 1.4181217944  |
| H49 | -0.4767804929 | -2.5716465051 | 1.2485698938  |
| C50 | -0.8761105996 | -0.5086236896 | 1.6017835642  |
| H51 | -1.9569181982 | -0.6335050608 | 1.5906552173  |
| C52 | -0.3506264610 | 0.8107860889  | 1.8026041444  |
| C53 | -1.1493498835 | 1.9525737684  | 2.0077815960  |
| H54 | -2.2316369767 | 1.8465777996  | 2.0232566932  |
| C55 | -0.5705931332 | 3.1952667474  | 2.1741841786  |
| H56 | -1.2010442353 | 4.0678438887  | 2.3280360135  |
| C57 | 0.8234620585  | 3.3857696975  | 2.0869106513  |
| H58 | 1.2672862124  | 4.3764303356  | 2.1035720190  |
| C59 | 1.5802145554  | 2.2578897769  | 1.9376208753  |
| C60 | 1.0538304501  | 0.9650937746  | 1.8026565650  |
| C61 | 1.8972705554  | -0.1714006209 | 1.7375945876  |
| C62 | 8.7157158446  | 1.6531096173  | 1.5071697389  |
| C63 | 8.3415272502  | 1.6614653366  | 2.8455087869  |
| C64 | 6.9889394177  | 1.6941409615  | 3.1569782501  |
| N65 | 6.0365805636  | 1.7241799053  | 2.2199695618  |
| C66 | 6.4008984186  | 1.7201174205  | 0.9320024726  |
| C67 | 7.7281938836  | 1.6822551554  | 0.5283710676  |
| H68 | 9.7662686734  | 1.6221289061  | 1.2290898064  |
| H69 | 9.0833686563  | 1.6354567099  | 3.6384358860  |
| H70 | 6.6394135721  | 1.6744590369  | 4.1887981730  |
| H71 | 5.5861213244  | 1.7501662892  | 0.2040817536  |
| H72 | 7.9790125568  | 1.6751201299  | -0.5283562592 |

### 3

|     |              |              |              |
|-----|--------------|--------------|--------------|
| Pd1 | 3.3695668195 | 1.9173722437 | 2.5536356138 |
| F2  | 5.4346911601 | 1.6316120060 | 2.4155606738 |
| F3  | 3.4453048155 | 2.7664130325 | 0.7439509436 |
| N4  | 3.7956012707 | 3.7177655762 | 3.4403095017 |
| C5  | 4.7441649072 | 4.4100431832 | 2.7912477108 |
| H6  | 4.9704293214 | 4.0566870490 | 1.7874814701 |
| C7  | 5.3654681363 | 5.4942009344 | 3.3849659655 |
| H8  | 6.1190098956 | 6.0478886335 | 2.8343253442 |
| C9  | 5.0193268622 | 5.8255407729 | 4.6900192862 |
| H10 | 5.5164098852 | 6.6479535889 | 5.1990524898 |

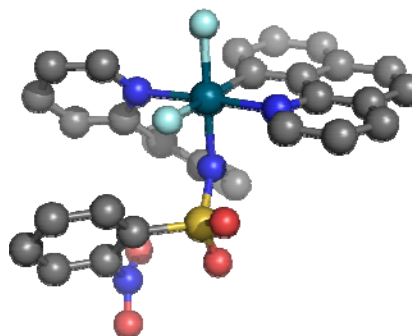

|     |               |               |              |
|-----|---------------|---------------|--------------|
| C11 | 4.0412515587  | 5.0965675343  | 5.3466360334 |
| H12 | 3.7719889033  | 5.3063238584  | 6.3782049195 |
| C13 | 3.4091249700  | 4.0350957181  | 4.6953297900 |
| C14 | 2.3149722785  | 3.2984331050  | 5.3406335882 |
| C15 | 1.3638362565  | 4.0115483853  | 6.0773745044 |
| H16 | 1.4489528227  | 5.0948545911  | 6.1495126970 |
| C17 | 0.2953840017  | 3.3618205867  | 6.6748800497 |
| H18 | -0.4430939440 | 3.9336072584  | 7.2313206181 |
| C19 | 0.1660936001  | 1.9806639447  | 6.5462268786 |
| H20 | -0.6699407966 | 1.4643274369  | 7.0113614435 |
| C21 | 1.0957756328  | 1.2613867989  | 5.8123906325 |
| H22 | 1.0177631579  | 0.1843357073  | 5.6955877495 |
| C23 | 2.1781919907  | 1.9054024538  | 5.2092771004 |
| N24 | 3.0845366405  | 1.1503861288  | 4.4343315429 |
| S25 | 4.2066486694  | 0.2333749599  | 5.2344103618 |
| O26 | 4.8454868531  | -0.6319241117 | 4.2605306932 |
| O27 | 3.5567442647  | -0.3298864145 | 6.4108107492 |
| C28 | 5.4714288924  | 1.3460173222  | 5.8757843033 |
| C29 | 6.5180897272  | 1.6998118186  | 5.0270392117 |
| H30 | 6.4797895077  | 1.3652583737  | 3.9891567934 |
| C31 | 7.5493413212  | 2.5084981614  | 5.4902125994 |
| H32 | 8.3491425396  | 2.7915012568  | 4.8103461566 |
| C33 | 7.5695364771  | 2.9349922048  | 6.8129882999 |
| H34 | 8.3855769594  | 3.5520284552  | 7.1815792253 |
| C35 | 6.5460008527  | 2.5649419987  | 7.6752538161 |
| H36 | 6.5435534111  | 2.8688739579  | 8.7191269295 |
| C37 | 5.4969424841  | 1.7940713242  | 7.1954752916 |
| N38 | 4.4275128950  | 1.5413558322  | 8.1792597153 |
| O39 | 4.7211107374  | 0.8571009288  | 9.1396537811 |
| O40 | 3.3717267963  | 2.1213092749  | 8.0007964929 |
| N41 | 3.0736877867  | 0.0868343991  | 1.7215752950 |
| C42 | 4.0374478390  | -0.7638182499 | 1.4167914056 |
| H43 | 5.0496582170  | -0.4171949563 | 1.6222148443 |
| C44 | 3.7041526983  | -2.0157503341 | 0.8801618043 |
| H45 | 4.5003171304  | -2.7112007178 | 0.6348044826 |
| C46 | 2.3790400666  | -2.3496892424 | 0.6825962916 |
| H47 | 2.1135574021  | -3.3224958910 | 0.2725305172 |
| C48 | 1.3592385501  | -1.4356272944 | 1.0080392284 |
| C49 | -0.0496305813 | -1.6419241997 | 0.8445641626 |
| H50 | -0.3910542272 | -2.5950721440 | 0.4450386970 |
| C51 | -0.9455345690 | -0.6691985677 | 1.1731308771 |
| H52 | -2.0114678873 | -0.8432239251 | 1.0340693964 |
| C53 | -0.5304155230 | 0.6021930978  | 1.6949763449 |

|     |               |               |              |
|-----|---------------|---------------|--------------|
| C54 | -1.4009852963 | 1.6606869468  | 2.0177265664 |
| H55 | -2.4736392393 | 1.5295106912  | 1.8907450670 |
| C56 | -0.8926817751 | 2.8605850927  | 2.4738481735 |
| H57 | -1.5741378235 | 3.6770244131  | 2.7042877415 |
| C58 | 0.4922292933  | 3.0675360976  | 2.6567662036 |
| H59 | 0.8534162573  | 4.0255684797  | 3.0219958517 |
| C60 | 1.3445623341  | 2.0299966823  | 2.3839916870 |
| C61 | 0.8487621292  | 0.8145693837  | 1.8858676039 |
| C62 | 1.7680789654  | -0.2042988820 | 1.5363576189 |

**A**

|     |              |               |              |
|-----|--------------|---------------|--------------|
| Pd1 | 3.1256410206 | 1.7214818488  | 2.9805614298 |
| N4  | 3.6647526867 | 3.4268529261  | 4.0049892486 |
| C5  | 4.4700864731 | 4.3027494037  | 3.3802990691 |
| H6  | 4.6960447363 | 4.0869790430  | 2.3371274135 |
| C7  | 4.9761381993 | 5.4191190756  | 4.0163127341 |
| H8  | 5.6131466778 | 6.1111881100  | 3.4751420991 |
| C9  | 4.6577343475 | 5.6096391164  | 5.3587164541 |
| H10 | 5.0604865235 | 6.4587230975  | 5.9047636753 |
| C11 | 3.8346208467 | 4.7006532417  | 5.9997314936 |
| H12 | 3.6073362361 | 4.7983955662  | 7.0575152882 |
| C13 | 3.3195480370 | 3.6033564888  | 5.3010518560 |
| C14 | 2.4367358614 | 2.6383433724  | 5.9653088106 |
| C15 | 1.5323160448 | 3.0702938433  | 6.9364544242 |
| H16 | 1.4230522234 | 4.1346421464  | 7.1353309169 |
| C17 | 0.7534224982 | 2.1573800346  | 7.6335626321 |
| H18 | 0.0504765969 | 2.5092047407  | 8.3835817270 |
| C19 | 0.8712435312 | 0.7966133572  | 7.3689871542 |
| H20 | 0.2738276234 | 0.0791195466  | 7.9250220179 |
| C21 | 1.7474024098 | 0.3497536240  | 6.3904111975 |
| H22 | 1.8682223003 | -0.7075190976 | 6.1720290846 |
| C23 | 2.5360291500 | 1.2599363902  | 5.6906521473 |
| N24 | 3.4210248752 | 0.7660107129  | 4.7052447260 |
| S25 | 4.9559610386 | 0.2605400483  | 5.1032203379 |
| O26 | 5.5411675961 | -0.1594886511 | 3.8334142176 |
| O27 | 4.8292309888 | -0.6549274952 | 6.2212507386 |
| C28 | 6.0218738323 | 1.6092924063  | 5.6610848543 |
| C29 | 6.8233995809 | 2.2141508667  | 4.6955066161 |
| H30 | 6.7120583940 | 1.9053085171  | 3.6584327881 |
| C31 | 7.7909328627 | 3.1449921811  | 5.0592476120 |
| H32 | 8.4061713520 | 3.6070581020  | 4.2913854395 |
| C33 | 8.0023078511 | 3.4453756163  | 6.3996352939 |
| H34 | 8.7781325480 | 4.1479057261  | 6.6910762855 |

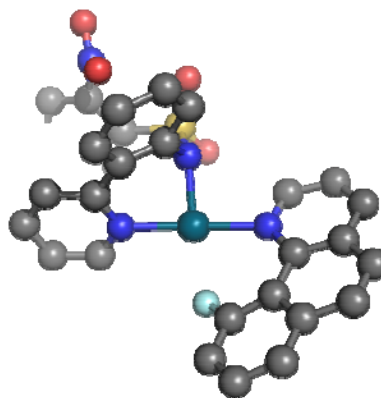

|     |               |               |               |
|-----|---------------|---------------|---------------|
| C35 | 7.2360433379  | 2.8211756805  | 7.3765153691  |
| H36 | 7.3984624184  | 3.0101629419  | 8.4342256755  |
| C37 | 6.2410115781  | 1.9312720959  | 7.0024102856  |
| N38 | 5.4275455224  | 1.3944492903  | 8.1065020603  |
| O39 | 6.0272998886  | 0.9081820734  | 9.0408561785  |
| O40 | 4.2219387800  | 1.5555424936  | 8.0233408515  |
| N41 | 2.4644950062  | 0.0057260728  | 1.9606871060  |
| C42 | 3.1221094815  | -1.1313875844 | 2.1811888270  |
| H43 | 4.0856416142  | -1.0399594968 | 2.6787006837  |
| C44 | 2.6020062231  | -2.3791536143 | 1.8350015954  |
| H45 | 3.1873242663  | -3.2732702461 | 2.0222196630  |
| C46 | 1.3277123494  | -2.4332554539 | 1.3296406947  |
| H47 | 0.8483860276  | -3.3861255252 | 1.1153768604  |
| C48 | 0.6133491218  | -1.2465261602 | 1.0870184627  |
| C49 | -0.7377088951 | -1.2927345815 | 0.6287217893  |
| H50 | -1.1935391362 | -2.2674206051 | 0.4702010396  |
| C51 | -1.4381410700 | -0.1514850935 | 0.4357278551  |
| H52 | -2.4809310887 | -0.1817684793 | 0.1287992899  |
| C53 | -0.8131867221 | 1.1257983417  | 0.5716478455  |
| C54 | -1.5420863409 | 2.2906814485  | 0.2589284575  |
| H55 | -2.5898923557 | 2.1844749005  | -0.0122963939 |
| C56 | -0.9479010940 | 3.5305238261  | 0.2687555731  |
| H57 | -1.5172753283 | 4.4212799530  | 0.0214220453  |
| C58 | 0.4179562693  | 3.6362852949  | 0.5622291680  |
| H59 | 0.9464030298  | 4.5840708011  | 0.5223140962  |
| C60 | 1.1088858065  | 2.5009145204  | 0.8854122294  |
| C61 | 0.5543640157  | 1.2101395491  | 0.9653223055  |
| C62 | 1.2444191483  | -0.0056188694 | 1.3430475105  |
| F62 | 2.4602441428  | 2.6709977047  | 1.0893926430  |

**7a**

|     |              |              |              |
|-----|--------------|--------------|--------------|
| Pd1 | 3.3557410465 | 1.6697278519 | 2.6878442071 |
| F2  | 3.7277566162 | 2.3719944899 | 0.8704857672 |
| N3  | 3.8170458653 | 3.5194311546 | 3.5056097298 |
| C4  | 4.6725426579 | 4.2454445667 | 2.7624528323 |
| H5  | 4.8154604137 | 3.8808733213 | 1.7445332712 |
| C6  | 5.2919206453 | 5.3694572923 | 3.2733519191 |
| H7  | 5.9794035595 | 5.9443573927 | 2.6598096393 |
| C8  | 5.0192612879 | 5.7281521109 | 4.5906133562 |
| C10 | 4.1182947386 | 4.9917253278 | 5.3357297184 |
| H11 | 3.9187406186 | 5.2496008540 | 6.3715713874 |
| C12 | 3.5033249185 | 3.8670948737 | 4.7750548596 |
| C13 | 2.5147681261 | 3.0989298330 | 5.5483236012 |
| C14 | 1.6434085221 | 3.7939789921 | 6.3961880396 |



|     |               |               |              |
|-----|---------------|---------------|--------------|
| H15 | 1.7096576205  | 4.8780061468  | 6.4640039622 |
| C16 | 0.6611594377  | 3.1252565596  | 7.1105083697 |
| H17 | -0.0086207175 | 3.6839289464  | 7.7582332613 |
| C18 | 0.5245494512  | 1.7454973983  | 6.9816189305 |
| H19 | -0.2450053647 | 1.2183590304  | 7.5386815927 |
| C20 | 1.3711350634  | 1.0404051055  | 6.1398207587 |
| H21 | 1.3051129568  | -0.0391210604 | 6.0364586817 |
| C22 | 2.3805166206  | 1.6990225014  | 5.4392821519 |
| N23 | 3.1968736989  | 0.9263255633  | 4.5837907112 |
| S24 | 4.7971136065  | 0.5328650830  | 4.8665688496 |
| O25 | 5.3684297685  | 0.8342554762  | 3.5141786520 |
| O26 | 4.9908615753  | -0.8167919114 | 5.3398166430 |
| C27 | 5.5849248046  | 1.7458581131  | 5.9670605079 |
| C28 | 6.6446167080  | 2.4365481285  | 5.3840648619 |
| H29 | 6.9197966920  | 2.2061479672  | 4.3587841334 |
| C30 | 7.3382547169  | 3.4105751368  | 6.0973765983 |
| H31 | 8.1630424076  | 3.9334302597  | 5.6205834071 |
| C32 | 6.9730921510  | 3.7193506825  | 7.4005071797 |
| H33 | 7.5053492518  | 4.4870934236  | 7.9550548993 |
| C34 | 5.9255995409  | 3.0302250203  | 8.0010824373 |
| H35 | 5.6174024368  | 3.2317853171  | 9.0225849035 |
| C36 | 5.2475106650  | 2.0479523129  | 7.2959819548 |
| N37 | 4.1677955228  | 1.3506587656  | 8.0129489883 |
| O38 | 3.7778961201  | 1.8303811046  | 9.0595993803 |
| O39 | 3.7382201230  | 0.3331269617  | 7.4960682527 |
| N40 | 2.8992661224  | -0.1879316888 | 1.9241267001 |
| C41 | 3.7235526340  | -1.2138069979 | 1.7618452185 |
| H42 | 4.7604523397  | -1.0629842366 | 2.0537702834 |
| C43 | 3.2466390475  | -2.4263569823 | 1.2483539015 |
| H44 | 3.9387491574  | -3.2533491715 | 1.1274821232 |
| C45 | 1.9128604760  | -2.5546945935 | 0.9144159865 |
| H46 | 1.5321860511  | -3.4948136966 | 0.5200288591 |
| C47 | 1.0358267905  | -1.4680244936 | 1.0858241545 |
| C48 | -0.3645576300 | -1.4658779354 | 0.7815502937 |
| H49 | -0.8088050690 | -2.3751806941 | 0.3828681624 |
| C50 | -1.1272048648 | -0.3554278500 | 0.9814755326 |
| H51 | -2.1880140105 | -0.3725161437 | 0.7413166810 |
| C52 | -0.5717965932 | 0.8597808869  | 1.5036803958 |
| C53 | -1.2970067192 | 2.0482860605  | 1.7204229709 |
| C54 | -0.6713344330 | 3.1735437057  | 2.2142444076 |
| H55 | -1.2433860305 | 4.0859890499  | 2.3645962733 |
| C56 | 0.7083488263  | 3.1893605630  | 2.5307714388 |
| H57 | 1.1759340462  | 4.0962948254  | 2.9020462577 |

|     |               |               |              |
|-----|---------------|---------------|--------------|
| C58 | 1.3944450032  | 2.0262510084  | 2.3352489732 |
| C59 | 0.8018678020  | 0.8677739077  | 1.8181912284 |
| C60 | 1.5872021293  | -0.2874197397 | 1.6031908916 |
| H60 | -2.3587668240 | 2.0746337970  | 1.4852075992 |
| C61 | 5.7799167889  | 6.8763055388  | 5.2055716764 |
| F62 | 5.2770243499  | 7.2253372070  | 6.3860740319 |
| F63 | 7.0557938683  | 6.5173902305  | 5.3882239788 |
| F64 | 5.7654207078  | 7.9343109966  | 4.4025396811 |

**7a<sup>‡</sup>**

|     |               |               |              |
|-----|---------------|---------------|--------------|
| Pd1 | 3.3345184059  | 1.8556211046  | 2.7936258701 |
| F2  | 3.1173316584  | 2.8753003979  | 1.0224615673 |
| N3  | 3.5649162705  | 3.6211607338  | 3.8541496143 |
| C4  | 4.3456048053  | 4.5533724674  | 3.2750087783 |
| H5  | 4.6279548247  | 4.3602252676  | 2.2424721610 |
| C6  | 4.7394212616  | 5.6905190446  | 3.9480920318 |
| H7  | 5.3633554373  | 6.4341329319  | 3.4613485040 |
| C8  | 4.3230291875  | 5.8428474740  | 5.2696462503 |
| C9  | 3.4970689722  | 4.9007875751  | 5.8485002804 |
| H10 | 3.1846763114  | 5.0029396494  | 6.8832665342 |
| C11 | 3.0967761003  | 3.7763573618  | 5.1140178530 |
| C12 | 2.1724994373  | 2.7971379974  | 5.6984965058 |
| C13 | 1.1667737453  | 3.2375298254  | 6.5649942179 |
| H14 | 1.0568622150  | 4.3007238644  | 6.7695030468 |
| C15 | 0.2742878150  | 2.3391700867  | 7.1315737141 |
| H16 | -0.5051092258 | 2.7019606540  | 7.7958994001 |
| C17 | 0.3678168999  | 0.9822168795  | 6.8361387967 |
| H18 | -0.3280541702 | 0.2778968275  | 7.2837090034 |
| C19 | 1.3497689121  | 0.5257938738  | 5.9696020276 |
| H20 | 1.4661058889  | -0.5303743238 | 5.7411777930 |
| C21 | 2.2646633542  | 1.4182406803  | 5.4144278825 |
| N22 | 3.2551305647  | 0.9075901654  | 4.5556890875 |
| S23 | 4.7539524612  | 0.4094636923  | 5.0663773773 |
| O24 | 5.5038281718  | 0.3465513055  | 3.8064407503 |
| O25 | 4.6245856870  | -0.7543713578 | 5.9166344167 |
| C26 | 5.5637524343  | 1.7149407338  | 6.0164830095 |
| C27 | 6.3872060574  | 2.5753573125  | 5.2917667492 |
| H28 | 6.4908144747  | 2.4202890290  | 4.2204529673 |
| C29 | 7.0961947830  | 3.5855061112  | 5.9313345932 |
| H30 | 7.7195162349  | 4.2583802499  | 5.3475543468 |
| C31 | 7.0323723573  | 3.7145832894  | 7.3133226860 |
| H32 | 7.5938295878  | 4.4956039675  | 7.8184081992 |
| C33 | 6.2638732621  | 2.8269582820  | 8.0552866090 |

|     |               |               |               |
|-----|---------------|---------------|---------------|
| H34 | 6.2241047559  | 2.8777007076  | 9.1397310920  |
| C35 | 5.5200946847  | 1.8525798606  | 7.4069074683  |
| N36 | 4.6755330134  | 1.0190734766  | 8.2801971056  |
| O37 | 5.1888271735  | 0.6003747682  | 9.2966074411  |
| O38 | 3.5137688846  | 0.8736178873  | 7.9430113421  |
| N39 | 3.0049082624  | 0.0558964404  | 1.7746688431  |
| C40 | 3.8126059637  | -0.9934115633 | 1.6876450981  |
| H41 | 4.7995254235  | -0.8814312903 | 2.1293856038  |
| C42 | 3.3808426931  | -2.1908673565 | 1.1025882192  |
| H43 | 4.0699111259  | -3.0272742469 | 1.0461359053  |
| C44 | 2.0812876457  | -2.3013928894 | 0.6577644985  |
| H45 | 1.7138577040  | -3.2380724026 | 0.2431507691  |
| C46 | 1.2112631101  | -1.1999115249 | 0.7560165298  |
| C47 | -0.1731191683 | -1.2236009917 | 0.3924268389  |
| H48 | -0.5847064921 | -2.1455531354 | -0.0123608758 |
| C49 | -0.9689078953 | -0.1369617746 | 0.5810632889  |
| H50 | -2.0283185784 | -0.1835429329 | 0.3393407075  |
| C51 | -0.4492741800 | 1.0959259672  | 1.0929837826  |
| C52 | -1.2324244229 | 2.2470985423  | 1.3132823576  |
| C53 | -0.6679705563 | 3.4076861950  | 1.7991502343  |
| H54 | -1.2844517940 | 4.2892136090  | 1.9556065657  |
| C55 | 0.7198814460  | 3.5108258246  | 2.0461539375  |
| H56 | 1.1872759902  | 4.4520119219  | 2.3156185041  |
| C57 | 1.4264099295  | 2.3625927306  | 1.8745859167  |
| C58 | 0.9303600000  | 1.1477121131  | 1.4015198080  |
| C59 | 1.7375934636  | -0.0141399444 | 1.2928108292  |
| C60 | 4.8547561142  | 7.0083220984  | 6.0643920798  |
| F61 | 4.2097114911  | 7.1586767427  | 7.2157724588  |
| F62 | 6.1484095481  | 6.8047999291  | 6.3324271412  |
| F63 | 4.7544560174  | 8.1363442527  | 5.3678921097  |
| H64 | -2.2948751720 | 2.2137599447  | 1.0835821303  |

**7e**

|     |              |              |              |
|-----|--------------|--------------|--------------|
| Pd1 | 3.3840112251 | 1.6776521791 | 2.6911852812 |
| F2  | 3.7579875697 | 2.3689004803 | 0.8705285493 |
| N3  | 3.8436324908 | 3.5218868832 | 3.5023554227 |
| C4  | 4.6998038585 | 4.2528088523 | 2.7629712530 |
| H5  | 4.8443415217 | 3.8925297915 | 1.7442468882 |
| C6  | 5.3155342146 | 5.3756764705 | 3.2748154444 |
| H7  | 5.9973438689 | 5.9444289304 | 2.6476214821 |
| C8  | 5.0670365684 | 5.7577757895 | 4.5973122749 |
| C10 | 4.1641297059 | 4.9939930286 | 5.3288723076 |
| H11 | 3.9620187613 | 5.2398831286 | 6.3691873233 |

|     |               |               |              |
|-----|---------------|---------------|--------------|
| C12 | 3.5420299578  | 3.8743213458  | 4.7744084811 |
| C13 | 2.5451463665  | 3.1147515061  | 5.5495707411 |
| C14 | 1.6732030367  | 3.8183993136  | 6.3896658193 |
| H15 | 1.7485725376  | 4.9019167834  | 6.4526485676 |
| C16 | 0.6813106977  | 3.1604011561  | 7.1005152274 |
| H17 | 0.0122718426  | 3.7270021404  | 7.7421630079 |
| C18 | 0.5320250855  | 1.7820702136  | 6.9742733119 |
| H19 | -0.2458896092 | 1.2632312821  | 7.5272853850 |
| C20 | 1.3763290887  | 1.0682229583  | 6.1378200810 |
| H21 | 1.2994648236  | -0.0105122159 | 6.0335093880 |
| C22 | 2.3969388452  | 1.7167636000  | 5.4433822902 |
| N23 | 3.2073562899  | 0.9366459318  | 4.5871881392 |
| S24 | 4.7964758190  | 0.5209996421  | 4.8761834000 |
| O25 | 5.3903512522  | 0.8296405327  | 3.5357619708 |
| O26 | 4.9714244184  | -0.8354046170 | 5.3391515141 |
| C27 | 5.5934287602  | 1.7017099279  | 6.0032737164 |
| C28 | 6.6744205565  | 2.3767281689  | 5.4424759143 |
| H29 | 6.9413959634  | 2.1717262306  | 4.4097863477 |
| C30 | 7.4047745462  | 3.2953803449  | 6.1910676516 |
| H31 | 8.2558917623  | 3.7956063279  | 5.7358780298 |
| C32 | 7.0503867101  | 3.5682619133  | 7.5043964747 |
| H33 | 7.6172304083  | 4.2847259430  | 8.0925844680 |
| C34 | 5.9687380397  | 2.9095165344  | 8.0765190910 |
| H35 | 5.6621883220  | 3.0929677330  | 9.1017925722 |
| C36 | 5.2576131821  | 1.9775372731  | 7.3377182207 |
| N37 | 4.1490832650  | 1.3019450976  | 8.0308742040 |
| O38 | 3.7517220845  | 1.7881876781  | 9.0722438001 |
| O39 | 3.7069321231  | 0.2957118513  | 7.5040158756 |
| N40 | 2.9391431934  | -0.1883296786 | 1.9331570046 |
| C41 | 3.7699742240  | -1.2081412206 | 1.7691336531 |
| H42 | 4.8086372851  | -1.0451666541 | 2.0477129636 |
| C43 | 3.2979417953  | -2.4296789344 | 1.2730164139 |
| H44 | 3.9957999195  | -3.2515275574 | 1.1505942892 |
| C45 | 1.9609777606  | -2.5728738136 | 0.9590910607 |
| H46 | 1.5833267485  | -3.5200642867 | 0.5791187575 |
| C47 | 1.0764045572  | -1.4927043388 | 1.1330605967 |
| C48 | -0.3282903688 | -1.5068031869 | 0.8503866375 |
| H49 | -0.7696040221 | -2.4238948565 | 0.4666679825 |
| C50 | -1.0985917087 | -0.4022443406 | 1.0533231616 |
| H51 | -2.1628750615 | -0.4316758545 | 0.8305193118 |
| C52 | -0.5471811391 | 0.8226010309  | 1.5570369663 |
| C53 | -1.2817889017 | 2.0043367473  | 1.7783476771 |
| C54 | -0.6606796209 | 3.1394273076  | 2.2552854697 |

|     |               |               |              |
|-----|---------------|---------------|--------------|
| H55 | -1.2409619311 | 4.0458908369  | 2.4105180374 |
| C56 | 0.7235494565  | 3.1726041458  | 2.5492240693 |
| H57 | 1.1881199758  | 4.0848547227  | 2.9115640449 |
| C58 | 1.4203819633  | 2.0164637624  | 2.3479183624 |
| C59 | 0.8312187963  | 0.8477486855  | 1.8490630450 |
| C60 | 1.6242672563  | -0.3024956960 | 1.6316442286 |
| H60 | -2.3475975201 | 2.0171986546  | 1.5611720005 |
| C61 | 5.7624837206  | 6.9342884634  | 5.1988814629 |
| H62 | 5.5285288993  | 7.0491303626  | 6.2609764494 |
| H63 | 6.8493609093  | 6.8384907360  | 5.0912735668 |
| H64 | 5.4750080254  | 7.8590032561  | 4.6845977505 |

**7e<sup>†</sup>**

|     |               |               |              |
|-----|---------------|---------------|--------------|
| Pd1 | 3.3935293992  | 1.8508632770  | 2.7919465690 |
| F2  | 3.1607159562  | 2.8705693403  | 1.0206223480 |
| N3  | 3.6283164969  | 3.6028962850  | 3.8548676208 |
| C4  | 4.4103783268  | 4.5448593522  | 3.2930025448 |
| H5  | 4.7385787551  | 4.3432722101  | 2.2756116458 |
| C6  | 4.7423174104  | 5.7059642170  | 3.9561633528 |
| H7  | 5.3625807574  | 6.4501810963  | 3.4630932048 |
| C8  | 4.2792029154  | 5.9052477737  | 5.2627543264 |
| C9  | 3.4646121714  | 4.9238626074  | 5.8140568072 |
| H10 | 3.1043729675  | 5.0301261614  | 6.8345497746 |
| C11 | 3.1190896450  | 3.7745870328  | 5.0977592837 |
| C12 | 2.1922102209  | 2.7864936913  | 5.6714885531 |
| C13 | 1.1623576654  | 3.2211477714  | 6.5118622533 |
| H14 | 1.0364258398  | 4.2847902892  | 6.7033721114 |
| C15 | 0.2686115618  | 2.3193655692  | 7.0713189206 |
| H16 | -0.5264164323 | 2.6809030696  | 7.7178601211 |
| C17 | 0.3793643009  | 0.9612556102  | 6.7891999042 |
| H18 | -0.3181428574 | 0.2534347191  | 7.2288325860 |
| C19 | 1.3798164558  | 0.5096574575  | 5.9420162197 |
| H20 | 1.5076314709  | -0.5464008762 | 5.7192228276 |
| C21 | 2.2973084195  | 1.4068090400  | 5.3981423581 |
| N22 | 3.2986388864  | 0.8986727731  | 4.5499672690 |
| S23 | 4.7800613221  | 0.3806337270  | 5.0768853453 |
| O24 | 5.5476486520  | 0.3011897602  | 3.8292414256 |
| O25 | 4.6267953854  | -0.7778004098 | 5.9313947488 |
| C26 | 5.5939422347  | 1.6780893072  | 6.0357832069 |
| C27 | 6.4317390516  | 2.5296707221  | 5.3184190092 |
| H28 | 6.5373887894  | 2.3774247802  | 4.2470161917 |
| C29 | 7.1559388390  | 3.5245771035  | 5.9652138636 |
| H30 | 7.7993290415  | 4.1820702603  | 5.3855587336 |

|     |               |               |              |
|-----|---------------|---------------|--------------|
| C31 | 7.0881026077  | 3.6483114850  | 7.3474037246 |
| H32 | 7.6702974918  | 4.4079769399  | 7.8621299429 |
| C33 | 6.2958807630  | 2.7750870082  | 8.0814863499 |
| H34 | 6.2502816559  | 2.8224768368  | 9.1658345895 |
| C35 | 5.5406206164  | 1.8149199745  | 7.4257704363 |
| N36 | 4.6767566837  | 0.9945462415  | 8.2934122455 |
| O37 | 5.1754084242  | 0.5738452148  | 9.3172112015 |
| O38 | 3.5170026892  | 0.8616111526  | 7.9460952536 |
| N39 | 3.0275763098  | 0.0531915489  | 1.7785004804 |
| C40 | 3.8150543969  | -1.0111421455 | 1.6923558652 |
| H41 | 4.8110990489  | -0.9103271721 | 2.1164246598 |
| C42 | 3.3531831688  | -2.2083365176 | 1.1304088541 |
| H43 | 4.0262054308  | -3.0576199567 | 1.0729992897 |
| C44 | 2.0443840034  | -2.3013594073 | 0.7088891703 |
| H45 | 1.6538003683  | -3.2365227855 | 0.3123077102 |
| C46 | 1.1943787849  | -1.1846055848 | 0.8098605085 |
| C47 | -0.1974928954 | -1.1904447175 | 0.4743120235 |
| H48 | -0.6310563538 | -2.1095247753 | 0.0862784015 |
| C49 | -0.9732372081 | -0.0905701588 | 0.6699071221 |
| H50 | -2.0380465457 | -0.1232792507 | 0.4503332390 |
| C51 | -0.4256814722 | 1.1382687665  | 1.1628169478 |
| C52 | -1.1885396336 | 2.3007008270  | 1.3940228142 |
| C53 | -0.5980342586 | 3.4552155193  | 1.8639456847 |
| H54 | -1.1994388084 | 4.3453625911  | 2.0305679160 |
| C55 | 0.7949786914  | 3.5393051267  | 2.0846441126 |
| H56 | 1.2808050978  | 4.4730147670  | 2.3478712424 |
| C57 | 1.4847064921  | 2.3820609302  | 1.9000063104 |
| C58 | 0.9609512512  | 1.1726439695  | 1.4416866825 |
| C59 | 1.7497758819  | -0.0018959367 | 1.3236549314 |
| C60 | 4.6724698508  | 7.1206552997  | 6.0352322396 |
| H61 | 4.0773304647  | 7.2394343266  | 6.9445135253 |
| H62 | 5.7280517981  | 7.0572817617  | 6.3281933044 |
| H63 | 4.5648966733  | 8.0261097496  | 5.4282451464 |
| H64 | -2.2560948368 | 2.2805956701  | 1.1873802900 |

**8a**

|     |              |              |              |
|-----|--------------|--------------|--------------|
| Pd1 | 3.4335760063 | 1.6851874091 | 2.6396494571 |
| F2  | 3.8323113367 | 2.3714609548 | 0.8215478285 |
| N4  | 3.9020686812 | 3.5253477849 | 3.4556514445 |
| C5  | 4.7660029097 | 4.2446101399 | 2.7173933600 |
| H6  | 4.9328214547 | 3.8655099399 | 1.7088942118 |
| C7  | 5.3534024070 | 5.3927891755 | 3.2164613935 |
| H8  | 6.0347802361 | 5.9620104289 | 2.5926259944 |

|     |               |               |              |
|-----|---------------|---------------|--------------|
| C9  | 5.0491093921  | 5.7805934724  | 4.5167002115 |
| H10 | 5.5083146647  | 6.6657758601  | 4.9495841901 |
| C11 | 4.1575405152  | 5.0280732146  | 5.2644819552 |
| H12 | 3.9293550348  | 5.2946267644  | 6.2926258947 |
| C13 | 3.5644253803  | 3.8874679459  | 4.7169184426 |
| C14 | 2.5542790927  | 3.1285270928  | 5.4752218913 |
| C15 | 1.6599995678  | 3.8368348520  | 6.2880575150 |
| H16 | 1.7321784676  | 4.9207351749  | 6.3474202219 |
| C17 | 0.6490590246  | 3.1834436097  | 6.9763121054 |
| H18 | -0.0365730368 | 3.7540847198  | 7.5964142693 |
| C19 | 0.5034872923  | 1.8039692350  | 6.8563426902 |
| H20 | -0.2881748319 | 1.2881959806  | 7.3924604003 |
| C21 | 1.3682524820  | 1.0851225561  | 6.0451172276 |
| H22 | 1.2917287302  | 0.0060664029  | 5.9433386253 |
| C23 | 2.4055212294  | 1.7294907875  | 5.3714770245 |
| N24 | 3.2238024767  | 0.9415111817  | 4.5291341097 |
| S25 | 4.8123287114  | 0.5193841549  | 4.8271176717 |
| O26 | 5.4184485388  | 0.8661941869  | 3.4981767652 |
| O27 | 4.9780294074  | -0.8515584104 | 5.2467043365 |
| C28 | 5.5885569574  | 1.6648865451  | 5.9965529163 |
| C29 | 6.7089286890  | 2.3222576092  | 5.4955514928 |
| H30 | 7.0177396599  | 2.1309385940  | 4.4717293531 |
| C31 | 7.4273964417  | 3.2056995674  | 6.2969702188 |
| H32 | 8.3121383725  | 3.6909962723  | 5.8934210649 |
| C33 | 7.0179026572  | 3.4642691491  | 7.5972627554 |
| H34 | 7.5764676917  | 4.1531016902  | 8.2248132308 |
| C35 | 5.8889408897  | 2.8316354089  | 8.1043614250 |
| H36 | 5.5356471849  | 3.0115124921  | 9.1153264748 |
| C37 | 5.1931537596  | 1.9298054798  | 7.3163226646 |
| N38 | 4.0353883340  | 1.2706501804  | 7.9377367098 |
| O39 | 3.5243525561  | 1.8125550068  | 8.8986082633 |
| O40 | 3.6687251650  | 0.2231366946  | 7.4329685998 |
| N41 | 2.9683397514  | -0.1647941778 | 1.8837611318 |
| C42 | 3.8033798814  | -1.1767786209 | 1.6967252701 |
| H43 | 4.8482278247  | -1.0037807375 | 1.9450307893 |
| C44 | 3.3290453910  | -2.4040108659 | 1.2161327378 |
| H45 | 4.0311979612  | -3.2187134841 | 1.0722996004 |
| C46 | 1.9848421231  | -2.5588520456 | 0.9453885460 |
| H47 | 1.6016621046  | -3.5087635738 | 0.5782628725 |
| C48 | 1.0985707753  | -1.4835590875 | 1.1461580240 |
| C49 | -0.3102058258 | -1.5033656914 | 0.9054624665 |
| H50 | -0.7590812919 | -2.4224527629 | 0.5352940412 |
| C51 | -1.0935947124 | -0.4108802477 | 1.1256033374 |

|     |               |               |              |
|-----|---------------|---------------|--------------|
| H52 | -2.1585551703 | -0.4651503091 | 0.9383245302 |
| C53 | -0.5429118860 | 0.8281650871  | 1.6046391953 |
| C54 | -1.2204603453 | 2.0556542820  | 1.8303003384 |
| C56 | -0.5649721031 | 3.2016587344  | 2.2288357539 |
| H57 | -1.1514354340 | 4.1078351272  | 2.3504180409 |
| C58 | 0.8189122502  | 3.2151149164  | 2.4781458654 |
| H59 | 1.3102846904  | 4.1294851933  | 2.7946859451 |
| C60 | 1.4817745781  | 2.0346339393  | 2.2980625234 |
| C61 | 0.8497465848  | 0.8646264190  | 1.8485116228 |
| C62 | 1.6455211229  | -0.2869288953 | 1.6224471115 |
| N61 | -2.6812945792 | 2.1861414181  | 1.6588324441 |
| O62 | -3.1241368109 | 3.3102991546  | 1.5151425122 |
| O63 | -3.3487847854 | 1.1659659109  | 1.6967485122 |

**8a<sup>†</sup>**

|     |               |               |              |
|-----|---------------|---------------|--------------|
| Pd1 | 3.3634349233  | 1.8603153601  | 2.7305142532 |
| F2  | 3.0199851481  | 2.8034539056  | 0.9497373388 |
| N3  | 3.6594444586  | 3.6453405645  | 3.7388736893 |
| C4  | 4.4180359990  | 4.5479768515  | 3.0927570948 |
| H5  | 4.6622411799  | 4.3101816322  | 2.0595443484 |
| C6  | 4.8255723253  | 5.7198875041  | 3.7019534139 |
| H7  | 5.4199681663  | 6.4388225448  | 3.1477071031 |
| C8  | 4.4503330745  | 5.9388988116  | 5.0244092285 |
| H9  | 4.7667531602  | 6.8397887943  | 5.5438700436 |
| C10 | 3.6724494982  | 4.9993502470  | 5.6803569548 |
| H11 | 3.3949738188  | 5.1358967414  | 6.7217333623 |
| C12 | 3.2550782318  | 3.8420647164  | 5.0156423820 |
| C13 | 2.3444522510  | 2.8825908028  | 5.6618239091 |
| C14 | 1.3450167966  | 3.3722806667  | 6.5108863811 |
| H15 | 1.2714532114  | 4.4422922042  | 6.6933317963 |
| C16 | 0.4041706399  | 2.5213471690  | 7.0723582131 |
| H17 | -0.3698072722 | 2.9256949351  | 7.7189496395 |
| C18 | 0.4340916657  | 1.1604237939  | 6.7806414151 |
| H19 | -0.3074785837 | 0.4923404653  | 7.2099004215 |
| C20 | 1.4102401233  | 0.6559712821  | 5.9360007920 |
| H21 | 1.4768878369  | -0.4048499108 | 5.7104209313 |
| C22 | 2.3857950014  | 1.4965988892  | 5.3980162420 |
| N23 | 3.3301168581  | 0.9230026814  | 4.5220800632 |
| S24 | 4.9422343662  | 0.6036428882  | 4.8211254860 |
| O25 | 5.5306859119  | 1.0755084496  | 3.5393472378 |
| O26 | 5.1918816730  | -0.7744597515 | 5.1786511058 |
| C27 | 5.6035722238  | 1.7108630128  | 6.0910637358 |
| C28 | 6.4892366672  | 2.6731479043  | 5.6146272275 |



|     |               |               |              |
|-----|---------------|---------------|--------------|
| H29 | 6.6988491431  | 2.7088704847  | 4.5493798140 |
| C30 | 7.1126275014  | 3.5592889189  | 6.4889991670 |
| H31 | 7.8017909497  | 4.3014608753  | 6.0942713727 |
| C32 | 6.8657665614  | 3.4872728219  | 7.8520659058 |
| H33 | 7.3512144557  | 4.1748377535  | 8.5389697559 |
| C34 | 6.0048368004  | 2.5146338952  | 8.3463571252 |
| H35 | 5.8050401630  | 2.4118138852  | 9.4086318457 |
| C36 | 5.3835149438  | 1.6353681579  | 7.4750960858 |
| N37 | 4.4833796397  | 0.6395087104  | 8.0808509504 |
| O38 | 4.5219077005  | 0.5026620087  | 9.2868214470 |
| O39 | 3.7501780951  | 0.0290126421  | 7.3211228642 |
| N40 | 3.0132217931  | 0.0436450523  | 1.8062081258 |
| C41 | 3.8496095568  | -0.9816383787 | 1.7108816526 |
| H42 | 4.8608792392  | -0.8252097324 | 2.0816409898 |
| C43 | 3.4205826342  | -2.2057530967 | 1.1848782827 |
| H44 | 4.1256827997  | -3.0280675419 | 1.1204091144 |
| C45 | 2.1052268955  | -2.3540290697 | 0.7952186254 |
| H46 | 1.7456241222  | -3.3077912800 | 0.4141856128 |
| C47 | 1.2125978275  | -1.2719978666 | 0.9063002673 |
| C48 | -0.1797791093 | -1.3110476354 | 0.5886108865 |
| H49 | -0.5949685694 | -2.2363135466 | 0.1948734377 |
| C50 | -0.9937743722 | -0.2394232891 | 0.7944715704 |
| H51 | -2.0514895537 | -0.3165920787 | 0.5783176681 |
| C52 | -0.4888322589 | 1.0088622725  | 1.3007623301 |
| C53 | -1.2226842219 | 2.1965730713  | 1.5579489193 |
| C55 | -0.6140131745 | 3.3555174472  | 2.0004937856 |
| H56 | -1.2392787383 | 4.2299578415  | 2.1553131158 |
| C57 | 0.7661083745  | 3.4315401726  | 2.2226828519 |
| H58 | 1.2373688085  | 4.3634712145  | 2.5162706364 |
| C59 | 1.4778828203  | 2.2836975737  | 2.0045176538 |
| C60 | 0.9021216404  | 1.0824219541  | 1.5568154204 |
| C61 | 1.7233765959  | -0.0663534121 | 1.4048646704 |
| N61 | -2.6845765011 | 2.2726837764  | 1.3913668332 |
| O62 | -3.1789851154 | 3.3838850643  | 1.3293714767 |
| O63 | -3.3109724700 | 1.2259008267  | 1.3507924882 |

**8g**

|     |              |              |              |
|-----|--------------|--------------|--------------|
| Pd1 | 3.4349498772 | 1.7248672418 | 2.6354530747 |
| F2  | 3.8337967576 | 2.4031751730 | 0.8159569464 |
| N3  | 3.9401975672 | 3.5591855232 | 3.4443813550 |
| C4  | 4.8075840291 | 4.2639242236 | 2.6962987104 |
| H5  | 4.9514056286 | 3.8814744582 | 1.6853187519 |
| C6  | 5.4272355126 | 5.3989496336 | 3.1886081934 |

|     |               |               |              |
|-----|---------------|---------------|--------------|
| H7  | 6.1116125629  | 5.9551516020  | 2.5566370745 |
| C8  | 5.1485792557  | 5.7883415274  | 4.4941055312 |
| H9  | 5.6311545092  | 6.6627035742  | 4.9236439632 |
| C10 | 4.2534565857  | 5.0506785074  | 5.2529428776 |
| H11 | 4.0468672776  | 5.3188802395  | 6.2852184586 |
| C12 | 3.6293091804  | 3.9234243370  | 4.7115940228 |
| C13 | 2.6163002812  | 3.1811996122  | 5.4838938131 |
| C14 | 1.7542424020  | 3.9056652180  | 6.3172302742 |
| H15 | 1.8530757608  | 4.9873498703  | 6.3796840130 |
| C16 | 0.7415021660  | 3.2734747359  | 7.0220004346 |
| H17 | 0.0823549478  | 3.8573250453  | 7.6585392681 |
| C18 | 0.5592541568  | 1.8990862185  | 6.8957944805 |
| H19 | -0.2356780935 | 1.3993292345  | 7.4423146902 |
| C20 | 1.3920841922  | 1.1649716675  | 6.0653609486 |
| H21 | 1.2856080347  | 0.0893270533  | 5.9564022812 |
| C22 | 2.4347915646  | 1.7861197693  | 5.3780907105 |
| N23 | 3.2237479459  | 0.9812489071  | 4.5244048026 |
| S24 | 4.7979677218  | 0.5110210936  | 4.8194626114 |
| O25 | 5.4342103442  | 0.8746267744  | 3.5133321153 |
| O26 | 4.9300870318  | -0.8737574824 | 5.2073350251 |
| C27 | 5.5687673600  | 1.6142049178  | 6.0349292168 |
| C28 | 6.6828724029  | 2.3008814216  | 5.5604109178 |
| H29 | 6.9967973091  | 2.1437300104  | 4.5322112896 |
| C30 | 7.3855526899  | 3.1708260192  | 6.3901152407 |
| H31 | 8.2642282537  | 3.6811819567  | 6.0045503353 |
| C32 | 6.9662349247  | 3.3869599001  | 7.6949891161 |
| H33 | 7.5099088644  | 4.0675268396  | 8.3443440124 |
| C34 | 5.8462038268  | 2.7214705886  | 8.1784579283 |
| H35 | 5.4858880882  | 2.8655705072  | 9.1925772078 |
| C36 | 5.1662811890  | 1.8335800278  | 7.3609461770 |
| N37 | 4.0161273909  | 1.1400035891  | 7.9599991223 |
| O38 | 3.5262228567  | 1.6202305510  | 8.9636593424 |
| O39 | 3.6319121274  | 0.1294840512  | 7.3977259518 |
| N40 | 2.9433502364  | -0.1335607047 | 1.8986019827 |
| C41 | 3.7570498008  | -1.1662200885 | 1.7343871120 |
| H42 | 4.8054472930  | -1.0110074092 | 1.9796748516 |
| C43 | 3.2548074583  | -2.3935688622 | 1.2826740452 |
| H44 | 3.9387858178  | -3.2271432685 | 1.1601721642 |
| C45 | 1.9075760569  | -2.5269388503 | 1.0144481634 |
| H46 | 1.5073577172  | -3.4787217783 | 0.6706669039 |
| C47 | 1.0398736728  | -1.4312320909 | 1.1880092678 |
| C48 | -0.3705030292 | -1.4326942621 | 0.9467164520 |
| H49 | -0.8361156703 | -2.3524344548 | 0.5998791409 |

|     |               |               |              |
|-----|---------------|---------------|--------------|
| C50 | -1.1194319183 | -0.3096060744 | 1.1412602455 |
| H51 | -2.1887025621 | -0.3214415082 | 0.9503527669 |
| C52 | -0.5311010899 | 0.9130066973  | 1.5967083999 |
| C53 | -1.2542109733 | 2.1217912045  | 1.8007280766 |
| C54 | -0.5956720220 | 3.2635144205  | 2.2338244240 |
| H55 | -1.1428665931 | 4.1897865563  | 2.3806639879 |
| C56 | 0.7947171098  | 3.2668975663  | 2.4911824714 |
| H57 | 1.2776935766  | 4.1837582714  | 2.8169413319 |
| C58 | 1.4743749398  | 2.0993320376  | 2.3125729605 |
| C59 | 0.8491281291  | 0.9314997428  | 1.8554184700 |
| C60 | 1.6174182512  | -0.2368319294 | 1.6415603752 |
| O61 | -2.5678347502 | 2.0488873659  | 1.5390788665 |
| C62 | -3.3517173529 | 3.2183826424  | 1.6777302880 |
| H63 | -4.3687740756 | 2.9390893430  | 1.4004787645 |
| H64 | -3.3447800901 | 3.5802725398  | 2.7142884127 |
| H65 | -2.9982207521 | 4.0132934696  | 1.0083544689 |

**8g<sup>‡</sup>**

|     |               |               |              |
|-----|---------------|---------------|--------------|
| Pd1 | 3.4936061482  | 1.9254765238  | 2.8171812431 |
| F2  | 2.6346106042  | 2.9131884612  | 0.9820339160 |
| N3  | 3.8584628384  | 3.5680418841  | 4.0033746240 |
| C4  | 4.7459587082  | 4.4759863831  | 3.5642607272 |
| H5  | 5.1431741453  | 4.3151936477  | 2.5642924331 |
| C6  | 5.1276243448  | 5.5585676076  | 4.3327131713 |
| H7  | 5.8422673926  | 6.2767411628  | 3.9442373603 |
| C8  | 4.5825871849  | 5.6802897075  | 5.6079190912 |
| H9  | 4.8799720763  | 6.4996231837  | 6.2562370363 |
| C10 | 3.6699645980  | 4.7405941797  | 6.0555041763 |
| H11 | 3.2721623139  | 4.7810564545  | 7.0657863961 |
| C12 | 3.2979338948  | 3.6768018520  | 5.2282692824 |
| C13 | 2.3392754612  | 2.6612770568  | 5.6914876787 |
| C14 | 1.2594834025  | 3.0335006137  | 6.4934374913 |
| H15 | 1.1102463709  | 4.0825384619  | 6.7386076289 |
| C16 | 0.3718270289  | 2.0815814911  | 6.9739198615 |
| H17 | -0.4614545510 | 2.3883934928  | 7.5990796013 |
| C18 | 0.5485197000  | 0.7383257053  | 6.6533855788 |
| H19 | -0.1379193611 | -0.0092850604 | 7.0410621311 |
| C20 | 1.5949100115  | 0.3500949397  | 5.8319200668 |
| H21 | 1.7657413920  | -0.6911655949 | 5.5767245359 |
| C22 | 2.4985978814  | 1.2993210729  | 5.3554854139 |
| N23 | 3.5423303512  | 0.8784092842  | 4.5079123913 |
| S24 | 4.9708528523  | 0.2598871789  | 5.0691595613 |
| O25 | 5.8203639927  | 0.1724596897  | 3.8838494229 |

|     |               |               |              |
|-----|---------------|---------------|--------------|
| O26 | 4.6939392871  | -0.9277896321 | 5.8454195316 |
| C27 | 5.7756556521  | 1.5102267121  | 6.1327744839 |
| C28 | 6.9570364315  | 2.0179796065  | 5.5943964631 |
| H29 | 7.2939755408  | 1.6260352913  | 4.6392859984 |
| C30 | 7.7051146717  | 2.9834293332  | 6.2612186185 |
| H31 | 8.6332580000  | 3.3379193527  | 5.8204367696 |
| C32 | 7.2721189635  | 3.4829792668  | 7.4813212488 |
| H33 | 7.8534532449  | 4.2299569657  | 8.0153313355 |
| C34 | 6.0825061880  | 3.0146826517  | 8.0199334930 |
| H35 | 5.7026845457  | 3.3928737335  | 8.9640353338 |
| C36 | 5.3469453012  | 2.0367892651  | 7.3623276854 |
| N37 | 4.1112218576  | 1.6382841810  | 8.0650481104 |
| O38 | 3.5369688856  | 2.5222205927  | 8.6869283283 |
| O39 | 3.7579120211  | 0.4794677318  | 7.9986577682 |
| N40 | 3.0016307196  | 0.2445199253  | 1.6906949842 |
| C41 | 3.8016485185  | -0.8170750490 | 1.6956723166 |
| H42 | 4.8078672069  | -0.6591982824 | 2.0794148739 |
| C43 | 3.3524194110  | -2.0818153178 | 1.3068570015 |
| H44 | 4.0410584865  | -2.9197255298 | 1.3088718302 |
| C45 | 2.0178819030  | -2.2412836344 | 1.0208617555 |
| H46 | 1.6068831176  | -3.2253252188 | 0.8069000978 |
| C47 | 1.1499457259  | -1.1332995082 | 1.0354182998 |
| C48 | -0.2603508123 | -1.2772103975 | 0.8823538373 |
| H49 | -0.6639280457 | -2.2701939233 | 0.6986165574 |
| C50 | -1.0807349091 | -0.2073754857 | 1.0342067809 |
| H51 | -2.1593940980 | -0.3218170437 | 1.0013380993 |
| C52 | -0.5497933732 | 1.1076963712  | 1.1944944826 |
| C53 | -1.4271300641 | 2.2275516435  | 1.3068595222 |
| C54 | -0.9199137422 | 3.5134767573  | 1.3497163580 |
| H55 | -1.5755893782 | 4.3733748095  | 1.4324152575 |
| C56 | 0.4590827687  | 3.7194886532  | 1.2165525394 |
| H57 | 0.8764012435  | 4.7206419361  | 1.1584906727 |
| C58 | 1.2944194444  | 2.6420539976  | 1.1489439572 |
| C59 | 0.8544623491  | 1.3061738758  | 1.2112902070 |
| C60 | 1.7015815731  | 0.1413876982  | 1.2908979373 |
| O61 | -2.7310559587 | 1.9222221992  | 1.3710851575 |
| C62 | -3.6689387007 | 2.9771670197  | 1.4756370323 |
| H63 | -4.6503230035 | 2.5066966594  | 1.5179540223 |
| H64 | -3.5098524715 | 3.5636636940  | 2.3900945495 |
| H65 | -3.6207597469 | 3.6395702004  | 0.6035309984 |

**10a**

|     |              |              |              |
|-----|--------------|--------------|--------------|
| Pd1 | 3.5578346211 | 1.9252127171 | 2.5505600570 |
|-----|--------------|--------------|--------------|

|     |               |               |               |
|-----|---------------|---------------|---------------|
| F2  | 3.6715283611  | 2.4371665189  | 0.6171448631  |
| N3  | 3.8315919984  | 3.9170393061  | 3.0991433581  |
| C4  | 4.5430389061  | 4.6385174491  | 2.2146829897  |
| H5  | 4.6555159319  | 4.1794392773  | 1.2337219675  |
| C6  | 5.0574363799  | 5.8784455624  | 2.5395303788  |
| H7  | 5.6121909837  | 6.4424053540  | 1.7968051928  |
| C8  | 4.8521334966  | 6.3618791592  | 3.8278303365  |
| H9  | 5.2742000732  | 7.3159436946  | 4.1330924307  |
| C10 | 4.0951350979  | 5.6226964957  | 4.7201505915  |
| H11 | 3.9221831477  | 5.9791498987  | 5.7312335495  |
| C12 | 3.5497561319  | 4.3920738366  | 4.3376287895  |
| C13 | 2.5864215692  | 3.6921822429  | 5.1971152540  |
| C14 | 1.6570190327  | 4.4695165522  | 5.8966030143  |
| H15 | 1.7174265821  | 5.5542000896  | 5.8345742831  |
| C16 | 0.6228320339  | 3.8849372614  | 6.6108828127  |
| H17 | -0.0939993635 | 4.5078035778  | 7.1383568809  |
| C18 | 0.4896795292  | 2.5001017818  | 6.6038051035  |
| H19 | -0.3329859992 | 2.0222143307  | 7.1301185939  |
| C20 | 1.3898509656  | 1.7074775180  | 5.9091925367  |
| H21 | 1.2349488545  | 0.6334706320  | 5.8892010029  |
| C22 | 2.4748123428  | 2.2815705237  | 5.2337279718  |
| N23 | 3.4905889463  | 1.5480945712  | 4.5952788960  |
| S24 | 3.7008284442  | -0.0841182359 | 4.9929514070  |
| O25 | 4.9962549000  | -0.4410576716 | 4.4326533117  |
| O26 | 2.5357348724  | -0.9011817245 | 4.6760588671  |
| C27 | 3.8746491243  | -0.0032118780 | 6.7690784258  |
| C28 | 4.8746290551  | 0.8163179539  | 7.2884408983  |
| H29 | 5.4985722183  | 1.3890218641  | 6.6070541560  |
| C30 | 5.0657306032  | 0.9036538190  | 8.6589719378  |
| H31 | 5.8468431210  | 1.5453845229  | 9.0568732768  |
| C32 | 4.2562081460  | 0.1703531655  | 9.5210125133  |
| H33 | 4.4000677542  | 0.2384734437  | 10.5958294025 |
| C34 | 3.2619924915  | -0.6551748515 | 9.0143718793  |
| H35 | 2.6219378021  | -1.2379716553 | 9.6721542428  |
| C36 | 3.0856176024  | -0.7444789196 | 7.6420031486  |
| N37 | 2.0258304028  | -1.6731586427 | 7.1955844099  |
| O38 | 2.3799522049  | -2.7838314543 | 6.8685430223  |
| O39 | 0.8829386672  | -1.2557875901 | 7.2692063876  |
| N40 | 3.2251913577  | -0.0159089704 | 1.9372811464  |
| C41 | 4.1425998145  | -0.9490712510 | 1.7160375761  |
| H42 | 5.1783867367  | -0.6760079980 | 1.8898426343  |
| C43 | 3.7736679908  | -2.2381098341 | 1.3225536884  |
| H44 | 4.5484746753  | -2.9804357840 | 1.1617918371  |

|     |               |               |              |
|-----|---------------|---------------|--------------|
| C45 | 2.4383090759  | -2.5455453400 | 1.1673827351 |
| H46 | 2.1300677215  | -3.5480716313 | 0.8778741101 |
| C47 | 1.4638585042  | -1.5577165222 | 1.3872896977 |
| C48 | 0.0547849462  | -1.7462930428 | 1.2589786248 |
| H49 | -0.3098474974 | -2.7299493234 | 0.9710696609 |
| C50 | -0.8316373778 | -0.7387139328 | 1.4853674142 |
| H51 | -1.8916462782 | -0.9210961423 | 1.3749980411 |
| C52 | -0.3951050539 | 0.5777667197  | 1.8668881623 |
| C53 | -1.1918387759 | 1.7310127835  | 2.1059495120 |
| C55 | -0.6339420502 | 2.9525586466  | 2.4275747484 |
| H56 | -1.3055360548 | 3.7928800363  | 2.5741028669 |
| C57 | 0.7509587226  | 3.1221938438  | 2.5681111940 |
| H58 | 1.1522872685  | 4.0988152948  | 2.8196271977 |
| C59 | 1.5373000331  | 2.0159864314  | 2.3919036281 |
| C60 | 0.9997140122  | 0.7748634473  | 2.0202916861 |
| C61 | 1.9062475204  | -0.2873187580 | 1.7743657198 |
| C62 | 8.5639821979  | 1.8051252130  | 2.2639329882 |
| C63 | 7.9535047844  | 1.9611994044  | 3.5029815201 |
| C64 | 6.5692243086  | 1.9622033349  | 3.5656288136 |
| N65 | 5.8088981312  | 1.8252294812  | 2.4748963868 |
| C66 | 6.3914199932  | 1.6970784513  | 1.2743410467 |
| C67 | 7.7706925476  | 1.6728603655  | 1.1302424414 |
| H68 | 9.6479110147  | 1.7925334678  | 2.1823792341 |
| H69 | 8.5389566857  | 2.0758024718  | 4.4101894675 |
| H70 | 6.0300937976  | 2.0753929036  | 4.5044296689 |
| H71 | 5.7084612156  | 1.6405350592  | 0.4262139042 |
| H72 | 8.2088904962  | 1.5597393581  | 0.1432403797 |
| N72 | -2.6681519675 | 1.7195121005  | 2.0171877795 |
| O73 | -3.2473720979 | 2.7667715778  | 2.2444369237 |
| O74 | -3.2221998382 | 0.6725401356  | 1.7279210375 |

**10a<sup>‡</sup>**

|     |              |              |              |
|-----|--------------|--------------|--------------|
| Pd1 | 3.6312876046 | 1.8931633385 | 2.6482978849 |
| F2  | 2.9454970979 | 2.5405304505 | 0.7417178048 |
| N3  | 3.9099602861 | 3.8419103343 | 3.3154367854 |
| C4  | 4.7677240400 | 4.6012753726 | 2.6142055256 |
| H5  | 5.1611801960 | 4.1597643203 | 1.7018238992 |
| C6  | 5.1130096445 | 5.8766767763 | 3.0169997585 |
| H7  | 5.7919401694 | 6.4700364688 | 2.4133865089 |
| C8  | 4.5692138153 | 6.3605206639 | 4.2032417402 |
| H9  | 4.8354733875 | 7.3489807420 | 4.5684855445 |
| C10 | 3.6827872700 | 5.5735332958 | 4.9175773179 |
| H11 | 3.2618102496 | 5.9226319725 | 5.8558090529 |

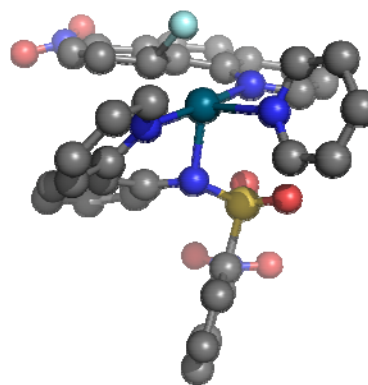

|     |               |               |               |
|-----|---------------|---------------|---------------|
| C12 | 3.3294291285  | 4.3029824108  | 4.4492295966  |
| C13 | 2.2867374683  | 3.5120638693  | 5.1135313783  |
| C14 | 1.1812122331  | 4.1789675862  | 5.6471839211  |
| H15 | 1.1303079142  | 5.2642179743  | 5.5817759830  |
| C16 | 0.1206381666  | 3.4775752690  | 6.2019817409  |
| H17 | -0.7367874409 | 4.0122666221  | 6.6008967457  |
| C18 | 0.1503668752  | 2.0865521699  | 6.2042103188  |
| H19 | -0.6803627851 | 1.5202137942  | 6.6180190418  |
| C20 | 1.2286866670  | 1.3986246105  | 5.6680100200  |
| H21 | 1.2159975279  | 0.3136100406  | 5.6657987527  |
| C22 | 2.3301297835  | 2.0946596191  | 5.1500701689  |
| N23 | 3.5078662815  | 1.4952367153  | 4.6740470487  |
| S24 | 3.8715074181  | -0.0935268740 | 5.1024793235  |
| O25 | 5.2113462118  | -0.3171946888 | 4.5791500166  |
| O26 | 2.8134298168  | -1.0428330259 | 4.7773927510  |
| C27 | 3.9671011359  | 0.0797045021  | 6.8769991354  |
| C28 | 4.8543560916  | 1.0295601034  | 7.3807339348  |
| H29 | 5.4521666443  | 1.6145953601  | 6.6858009473  |
| C30 | 4.9580029454  | 1.2305447536  | 8.7489379252  |
| H31 | 5.6517454152  | 1.9717510453  | 9.1360585351  |
| C32 | 4.1689449253  | 0.4874990940  | 9.6221715128  |
| H33 | 4.2423088753  | 0.6473087688  | 10.6945280926 |
| C34 | 3.2839616978  | -0.4625677586 | 9.1308389046  |
| H35 | 2.6605597853  | -1.0525167234 | 9.7980669947  |
| C36 | 3.1983445361  | -0.6676921165 | 7.7622476506  |
| N37 | 2.2623718105  | -1.7253916423 | 7.3297163599  |
| O38 | 2.7461016509  | -2.8058117020 | 7.0738067624  |
| O39 | 1.0797772918  | -1.4307388155 | 7.3396068538  |
| N40 | 3.2101149144  | -0.0210124930 | 1.9712741155  |
| C41 | 4.0517210889  | -1.0450830147 | 1.8798175441  |
| H42 | 5.0910236862  | -0.8441332678 | 2.1250612080  |
| C43 | 3.5976641419  | -2.3276600379 | 1.5607481733  |
| H44 | 4.3130279221  | -3.1415457449 | 1.5045387222  |
| C45 | 2.2464190893  | -2.5445871287 | 1.3903122427  |
| H46 | 1.8656320697  | -3.5463397155 | 1.2017560756  |
| C47 | 1.3464898622  | -1.4685603666 | 1.4803541451  |
| C48 | -0.0743344996 | -1.5799573137 | 1.3976819104  |
| H49 | -0.5055428896 | -2.5631270163 | 1.2220403383  |
| C50 | -0.8904642711 | -0.5062516121 | 1.5801067645  |
| H51 | -1.9648402153 | -0.6327163678 | 1.5530497961  |
| C52 | -0.3622656866 | 0.8132091174  | 1.7943527334  |
| C53 | -1.0962271514 | 2.0038220159  | 2.0441304223  |
| C55 | -0.4741405911 | 3.2277592837  | 2.2197202698  |

|     |               |               |               |
|-----|---------------|---------------|---------------|
| H56 | -1.1024055620 | 4.0930826368  | 2.4088853796  |
| C57 | 0.9098145620  | 3.3761261690  | 2.1083726686  |
| H58 | 1.3798587839  | 4.3538971456  | 2.1308903372  |
| C59 | 1.6349654711  | 2.2231783099  | 1.9355936445  |
| C60 | 1.0479464460  | 0.9492789626  | 1.8006726262  |
| C61 | 1.8831157699  | -0.1961547656 | 1.7302945282  |
| C62 | 8.7019200535  | 1.7351514243  | 1.5934221694  |
| C63 | 8.3017295451  | 1.7876167477  | 2.9234787879  |
| C64 | 6.9441387835  | 1.7635389514  | 3.2103081628  |
| N65 | 6.0105081203  | 1.6979719839  | 2.2558152732  |
| C66 | 6.3985768103  | 1.6531917388  | 0.9750604806  |
| C67 | 7.7337084726  | 1.6658797286  | 0.5974987217  |
| H68 | 9.7578283436  | 1.7471520595  | 1.3352525404  |
| H69 | 9.0281407311  | 1.8396897187  | 3.7292500397  |
| H70 | 6.5760037562  | 1.7773488417  | 4.2353219341  |
| H71 | 5.5986867583  | 1.6095248621  | 0.2319405691  |
| H72 | 8.0050993002  | 1.6227573961  | -0.4531359903 |
| N72 | -2.5618179357 | 2.0225849182  | 2.1372202203  |
| O73 | -3.0681563518 | 2.9728165222  | 2.7107967441  |
| O74 | -3.1860460407 | 1.1023192637  | 1.6339333950  |

**10g**

|     |               |              |              |
|-----|---------------|--------------|--------------|
| Pd1 | 3.5542711820  | 1.9437673821 | 2.5607028949 |
| F2  | 3.6863522122  | 2.4661214085 | 0.6345838660 |
| N3  | 3.8499346277  | 3.9227252020 | 3.1263249385 |
| C4  | 4.5696467423  | 4.6427309212 | 2.2481641454 |
| H5  | 4.6835272806  | 4.1847109712 | 1.2667208906 |
| C6  | 5.0900462173  | 5.8780336017 | 2.5799711995 |
| H7  | 5.6528199560  | 6.4408263407 | 1.8425908062 |
| C8  | 4.8806753686  | 6.3575626362 | 3.8689195754 |
| H9  | 5.3064766749  | 7.3080171980 | 4.1799473701 |
| C10 | 4.1161388086  | 5.6190634005 | 4.7550905563 |
| H11 | 3.9419376818  | 5.9721187252 | 5.7670371322 |
| C12 | 3.5652386273  | 4.3930093050 | 4.3655711028 |
| C13 | 2.5996968573  | 3.6926877062 | 5.2223613270 |
| C14 | 1.6806483256  | 4.4699579589 | 5.9356280507 |
| H15 | 1.7479480557  | 5.5545700458 | 5.8814123333 |
| C16 | 0.6502533032  | 3.8868365687 | 6.6552893619 |
| H17 | -0.0566455154 | 4.5099163685 | 7.1956383521 |
| C18 | 0.5094016344  | 2.5031952077 | 6.6395999989 |
| H19 | -0.3101436132 | 2.0257511192 | 7.1711427426 |
| C20 | 1.3977537457  | 1.7102396973 | 5.9306519909 |
| H21 | 1.2373809737  | 0.6370896477 | 5.9019184428 |



|     |               |               |               |
|-----|---------------|---------------|---------------|
| C22 | 2.4792571877  | 2.2829020555  | 5.2489012842  |
| N23 | 3.4846995672  | 1.5469870854  | 4.5976807974  |
| S24 | 3.6982769760  | -0.0802573541 | 4.9938157495  |
| O25 | 4.9889647418  | -0.4436085200 | 4.4264901533  |
| O26 | 2.5314015823  | -0.9023536482 | 4.6967205761  |
| C27 | 3.8882299162  | 0.0076042049  | 6.7701781619  |
| C28 | 4.8794857440  | 0.8435487334  | 7.2797478807  |
| H29 | 5.4858787656  | 1.4267053880  | 6.5913446001  |
| C30 | 5.0814597088  | 0.9370289102  | 8.6482617210  |
| H31 | 5.8553454446  | 1.5925950784  | 9.0376524660  |
| C32 | 4.2914809437  | 0.1932148593  | 9.5192393418  |
| H33 | 4.4435854698  | 0.2662740704  | 10.5925418676 |
| C34 | 3.3057229667  | -0.6479387665 | 9.0230219514  |
| H35 | 2.6796923276  | -1.2383565553 | 9.6873403581  |
| C36 | 3.1188076462  | -0.7425655819 | 7.6522096444  |
| N37 | 2.0666763292  | -1.6854958070 | 7.2181577254  |
| O38 | 2.4316367777  | -2.7930482534 | 6.8907564515  |
| O39 | 0.9193702918  | -1.2834045676 | 7.3031885491  |
| N40 | 3.1878187997  | 0.0041779828  | 1.9408287456  |
| C41 | 4.0812732313  | -0.9504516365 | 1.7157908561  |
| H42 | 5.1242808627  | -0.7041837129 | 1.8867707560  |
| C43 | 3.6753743112  | -2.2287182006 | 1.3234887756  |
| H44 | 4.4290702768  | -2.9922088889 | 1.1610425149  |
| C45 | 2.3319697790  | -2.5018859417 | 1.1704620030  |
| H46 | 2.0020216923  | -3.4971735337 | 0.8808536734  |
| C47 | 1.3784720480  | -1.4930816728 | 1.3902987420  |
| C48 | -0.0365249063 | -1.6489772487 | 1.2533318082  |
| H49 | -0.4230681043 | -2.6229050600 | 0.9619409467  |
| C50 | -0.8844193000 | -0.6066676430 | 1.4779969793  |
| H51 | -1.9570353965 | -0.7340632917 | 1.3646220218  |
| C52 | -0.3952219623 | 0.6808766287  | 1.8645518641  |
| C53 | -1.2263047094 | 1.8144082557  | 2.0792847655  |
| C55 | -0.6618983484 | 3.0333702616  | 2.4229621470  |
| H56 | -1.2901122677 | 3.9066842481  | 2.5710782045  |
| C57 | 0.7334108401  | 3.1815896878  | 2.5849841634  |
| H58 | 1.1320550772  | 4.1571250638  | 2.8499067254  |
| C59 | 1.5293841942  | 2.0845238670  | 2.4124550821  |
| C60 | 0.9898050956  | 0.8497185311  | 2.0310652282  |
| C61 | 1.8620009022  | -0.2356057425 | 1.7810196639  |
| C62 | 8.5778054496  | 1.7427615297  | 2.2510816530  |
| C63 | 7.9749542922  | 1.9161210646  | 3.4916425026  |
| C64 | 6.5909320911  | 1.9370221987  | 3.5590655650  |
| N65 | 5.8227416673  | 1.8051107456  | 2.4738040974  |

|     |               |              |              |
|-----|---------------|--------------|--------------|
| C66 | 6.3989290534  | 1.6613660270 | 1.2727724595 |
| C67 | 7.7773934104  | 1.6148757338 | 1.1220624389 |
| H68 | 9.6611408922  | 1.7133649481 | 2.1649236363 |
| H69 | 8.5660126498  | 2.0283978151 | 4.3956129228 |
| H70 | 6.0585553494  | 2.0636248222 | 4.5002499343 |
| H71 | 5.7118528969  | 1.6105158128 | 0.4276406576 |
| H72 | 8.2096634894  | 1.4883963448 | 0.1339933491 |
| O72 | -2.5420729482 | 1.5993424064 | 1.9111769811 |
| C73 | -3.4278576905 | 2.6889403068 | 2.0676045919 |
| H74 | -4.4288688729 | 2.3005097924 | 1.8761895178 |
| H75 | -3.3855799592 | 3.0936121463 | 3.0875693253 |
| H76 | -3.2053923773 | 3.4881651683 | 1.3483243245 |

**10g<sup>‡</sup>**

|     |               |               |              |
|-----|---------------|---------------|--------------|
| Pd1 | 3.6271097272  | 1.9155299449  | 2.7077490826 |
| F2  | 3.0543867289  | 2.6233436072  | 0.8086110093 |
| N3  | 3.9297284702  | 3.8394820727  | 3.4106314403 |
| C4  | 4.8141548194  | 4.6007297773  | 2.7469795778 |
| H5  | 5.2377011464  | 4.1635223823  | 1.8463861587 |
| C6  | 5.1502573703  | 5.8708368869  | 3.1744997224 |
| H7  | 5.8545430690  | 6.4662177445  | 2.6026680951 |
| C8  | 4.5655751564  | 6.3456814443  | 4.3445175121 |
| H9  | 4.8220724698  | 7.3299314493  | 4.7280251926 |
| C10 | 3.6545936090  | 5.5538897858  | 5.0218029457 |
| H11 | 3.2055965156  | 5.8944176961  | 5.9500588372 |
| C12 | 3.3156554903  | 4.2883151458  | 4.5302818754 |
| C13 | 2.2654334105  | 3.4819264603  | 5.1647379439 |
| C14 | 1.1448294208  | 4.1343221559  | 5.6835478397 |
| H15 | 1.0841790440  | 5.2187444940  | 5.6188664061 |
| C16 | 0.0878454953  | 3.4216306522  | 6.2295516093 |
| H17 | -0.7786208890 | 3.9468238618  | 6.6222115862 |
| C18 | 0.1397241117  | 2.0318633937  | 6.2407689824 |
| H19 | -0.6845770628 | 1.4541002412  | 6.6522336483 |
| C20 | 1.2337313378  | 1.3573066970  | 5.7188666658 |
| H21 | 1.2384312930  | 0.2721117235  | 5.7215920045 |
| C22 | 2.3262748688  | 2.0658710445  | 5.2016704375 |
| N23 | 3.5083202135  | 1.4768064764  | 4.7207660677 |
| S24 | 3.9007507757  | -0.0909112402 | 5.1565150763 |
| O25 | 5.2380138370  | -0.3087447185 | 4.6213958916 |
| O26 | 2.8563548144  | -1.0652225444 | 4.8583262335 |
| C27 | 4.0214089712  | 0.0942924786  | 6.9313161330 |
| C28 | 4.8984197243  | 1.0632517407  | 7.4166112551 |
| H29 | 5.4689332589  | 1.6589706486  | 6.7073581376 |

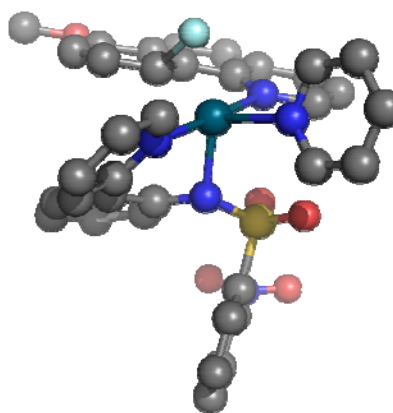

|     |               |               |               |
|-----|---------------|---------------|---------------|
| C30 | 5.0271274360  | 1.2681185241  | 8.7824997410  |
| H31 | 5.7142464839  | 2.0239616142  | 9.1530827239  |
| C32 | 4.2728338464  | 0.5108970220  | 9.6748884185  |
| H33 | 4.3655513693  | 0.6736695811  | 10.7451677851 |
| C34 | 3.3978791167  | -0.4578211218 | 9.2014947632  |
| H35 | 2.8004886068  | -1.0605090971 | 9.8811809007  |
| C36 | 3.2881663887  | -0.6662028560 | 7.8342761671  |
| N37 | 2.3661926669  | -1.7441268284 | 7.4212524822  |
| O38 | 2.8658550745  | -2.8178075362 | 7.1670875434  |
| O39 | 1.1782706820  | -1.4717433070 | 7.4430817697  |
| N40 | 3.1709176635  | 0.0155274604  | 2.0082381572  |
| C41 | 3.9834352994  | -1.0318398180 | 1.9372936859  |
| H42 | 5.0241140013  | -0.8583729342 | 2.1981545758  |
| C43 | 3.4970820558  | -2.3042688171 | 1.6196302816  |
| H44 | 4.1897976358  | -3.1385471137 | 1.5774294012  |
| C45 | 2.1432591790  | -2.4848863666 | 1.4366384507  |
| H46 | 1.7371884385  | -3.4773793228 | 1.2507378032  |
| C47 | 1.2702844049  | -1.3834013706 | 1.5040104576  |
| C48 | -0.1518224381 | -1.4646373284 | 1.3858466454  |
| H49 | -0.6010632404 | -2.4412939187 | 1.2189608234  |
| C50 | -0.9339596359 | -0.3571108416 | 1.5179387566  |
| H51 | -2.0161846697 | -0.4351525279 | 1.4708848155  |
| C52 | -0.3609681087 | 0.9383355565  | 1.7085629537  |
| C53 | -1.1374161998 | 2.1240178725  | 1.8480335048  |
| C55 | -0.5170563318 | 3.3540451883  | 2.0177446329  |
| H56 | -1.1073297581 | 4.2593070368  | 2.1222505352  |
| C57 | 0.8868300546  | 3.4732646804  | 1.9894721778  |
| H58 | 1.3661025901  | 4.4477145110  | 1.9959168336  |
| C59 | 1.6107553464  | 2.3200917023  | 1.9228990666  |
| C60 | 1.0418619396  | 1.0471856322  | 1.7706331558  |
| C61 | 1.8435444945  | -0.1236369524 | 1.7461597099  |
| C62 | 8.6637271080  | 1.6254951536  | 1.3541748572  |
| C63 | 8.3515651781  | 1.6105061191  | 2.7084360104  |
| C64 | 7.0146087656  | 1.6317425804  | 3.0823792121  |
| N65 | 6.0192828743  | 1.6726785963  | 2.1911809790  |
| C66 | 6.3239860146  | 1.6918859769  | 0.8879706350  |
| C67 | 7.6316719449  | 1.6659776577  | 0.4229514628  |
| H68 | 9.7004464692  | 1.6042435842  | 1.0272699459  |
| H69 | 9.1293405618  | 1.5756248653  | 3.4659068519  |
| H70 | 6.7129911884  | 1.5928230648  | 4.1288810884  |
| H71 | 5.4758026979  | 1.7352706233  | 0.1998779511  |
| H72 | 7.8333280484  | 1.6774627838  | -0.6443613433 |
| O72 | -2.4677458273 | 1.9398652597  | 1.7957187492  |

|     |               |              |              |
|-----|---------------|--------------|--------------|
| C73 | -3.3077358613 | 3.0746434169 | 1.8497073402 |
| H74 | -4.3298566523 | 2.7041904202 | 1.7610624253 |
| H75 | -3.1978897404 | 3.6070521533 | 2.8041929709 |
| H76 | -3.0982332268 | 3.7634894705 | 1.0206293105 |

## Spectroscopic Data

 $^1\text{H}$  NMR (acetonitrile- $d_3$ , 23 °C) of 1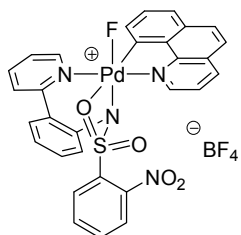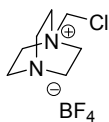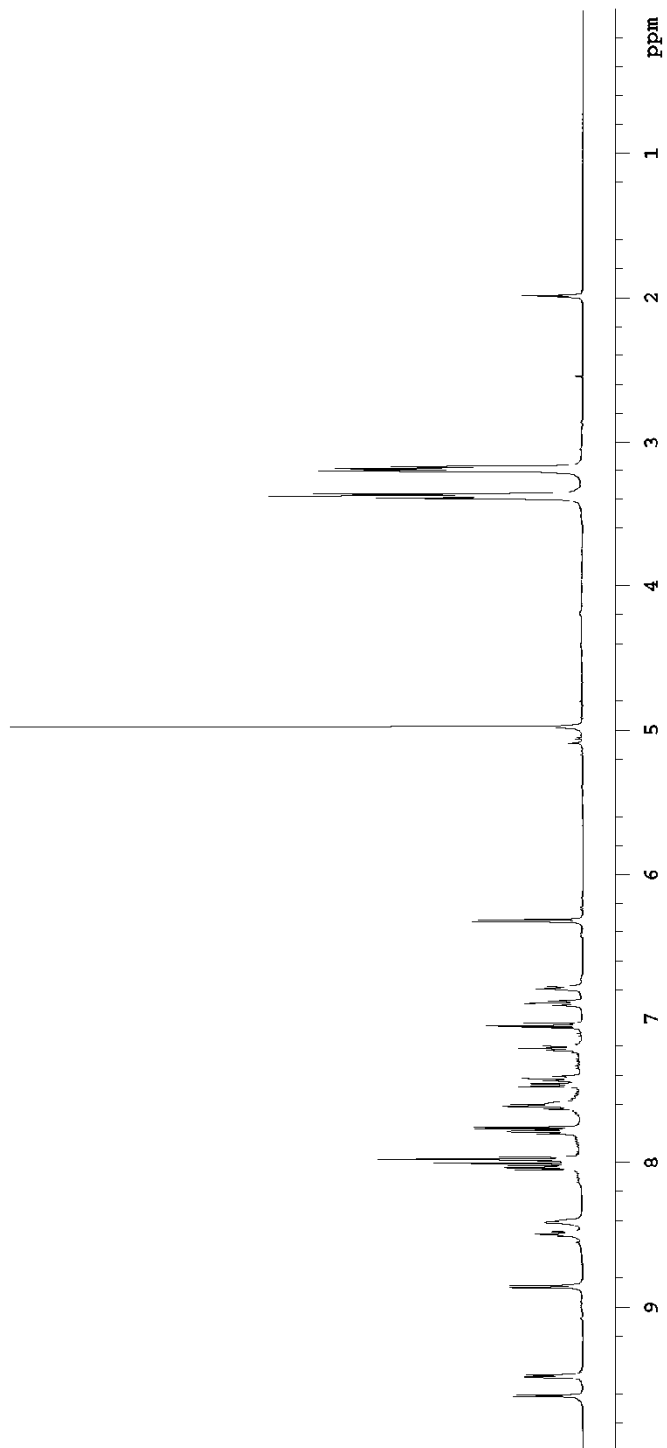

$^{13}\text{C}$  NMR (acetonitrile- $d_3$ , 23 °C) of 1

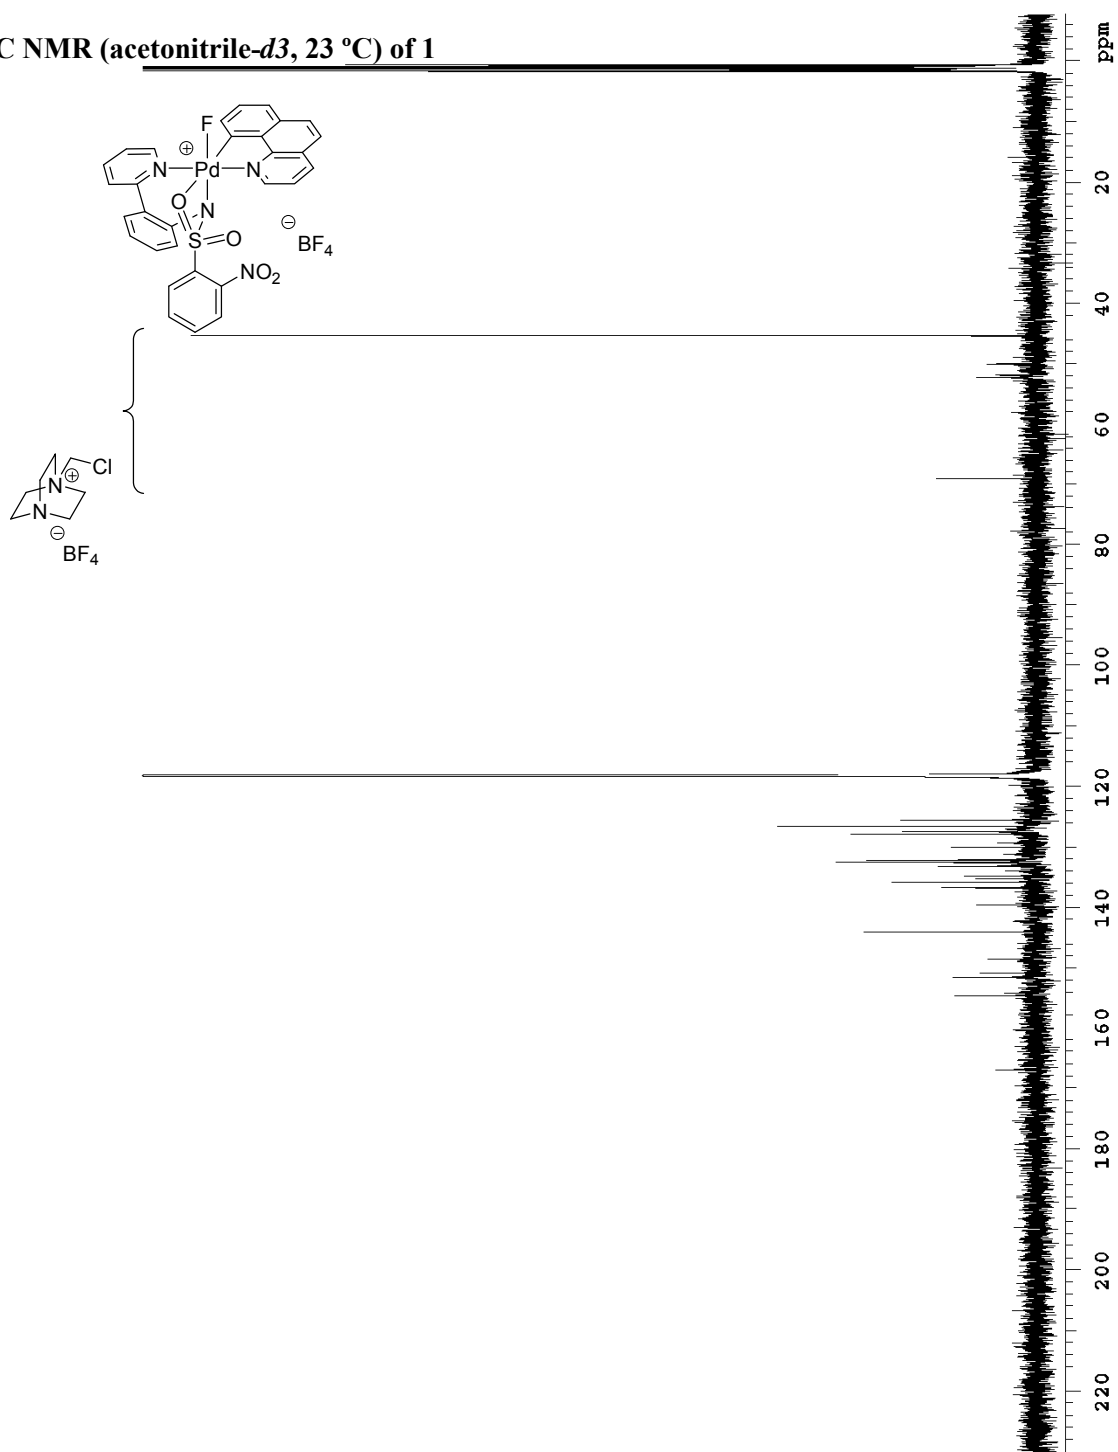

## STANDARD PROTON PARAMETERS

Data Collected On:  
 Sample: hcv6500  
 Archive: /home/ds2/vmarsys/data  
 Sample directory:

File: Pd4FMeCN\_COSY

Pulse Sequence: gCOSY

Solvent: CD3CN

Temp. 23.0 C / 296.1 K

Relax. delay 1.000 sec

Acq. time 0.145 sec

Width 3523.9 Hz

2D Width 3523.9 Hz

120 increments

OBSERVE H1 500.1765938 MHz

DATA PROCESSING

Sq. sine bell 0.073 sec

F1 DATA PROCESSING

Sq. sine bell 0.036 sec

F2 1.024

Total time 2 min

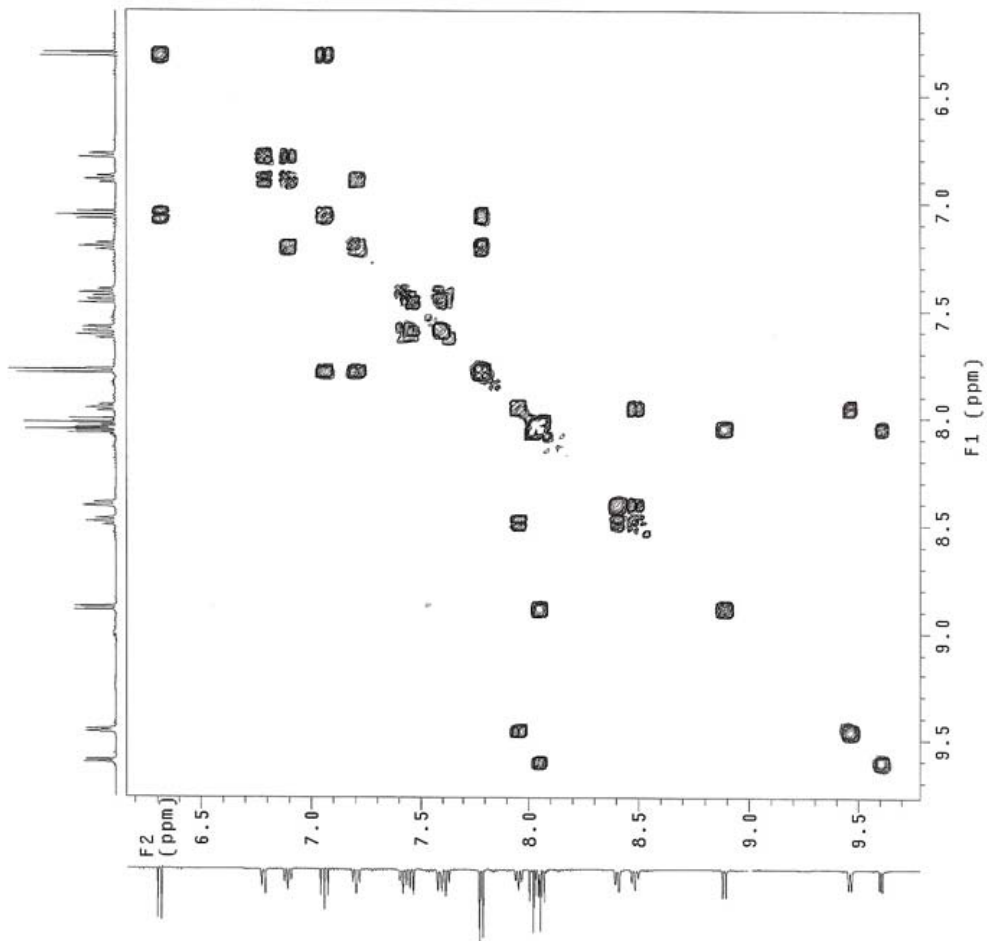

$^1\text{H}$ - $^1\text{H}$  COSY (acetonitrile- $d_3$ , 23 °C) of 1

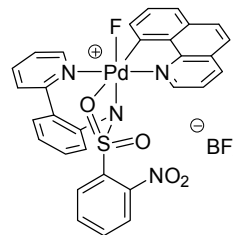

## STANDARD PROTON PARAMETERS

Data Collected on:  
 nmrsum2, nov04500  
 Ar: /export/home/ds2/vnmrSYS/data  
 Sample directory:

File: Pd4FMeCN\_HSQC

Pulse Sequence: gHSQC

Solvent: CD3CN

Temp: 23.0 C / 296.1 K

User: 1-14-87

Relax. delay 1.000 sec

Acq. time 0.245 sec

Width 4186.9 Hz

F2 Width 21356.1 Hz

2 x 128 increments

OBSERVE H1, 499.6111450 MHz

DECOUPLE C13, 125.6367144 MHz

Power 42 dB

on during acquisition

on during delay

CGAP=1

DATA PROCESSING

Gauss apodization 0.113 sec

F1 DATA PROCESSING

Gauss apodization 0.011 sec

F1 size 2048 x 2048

Total time 1 hr, 8 min

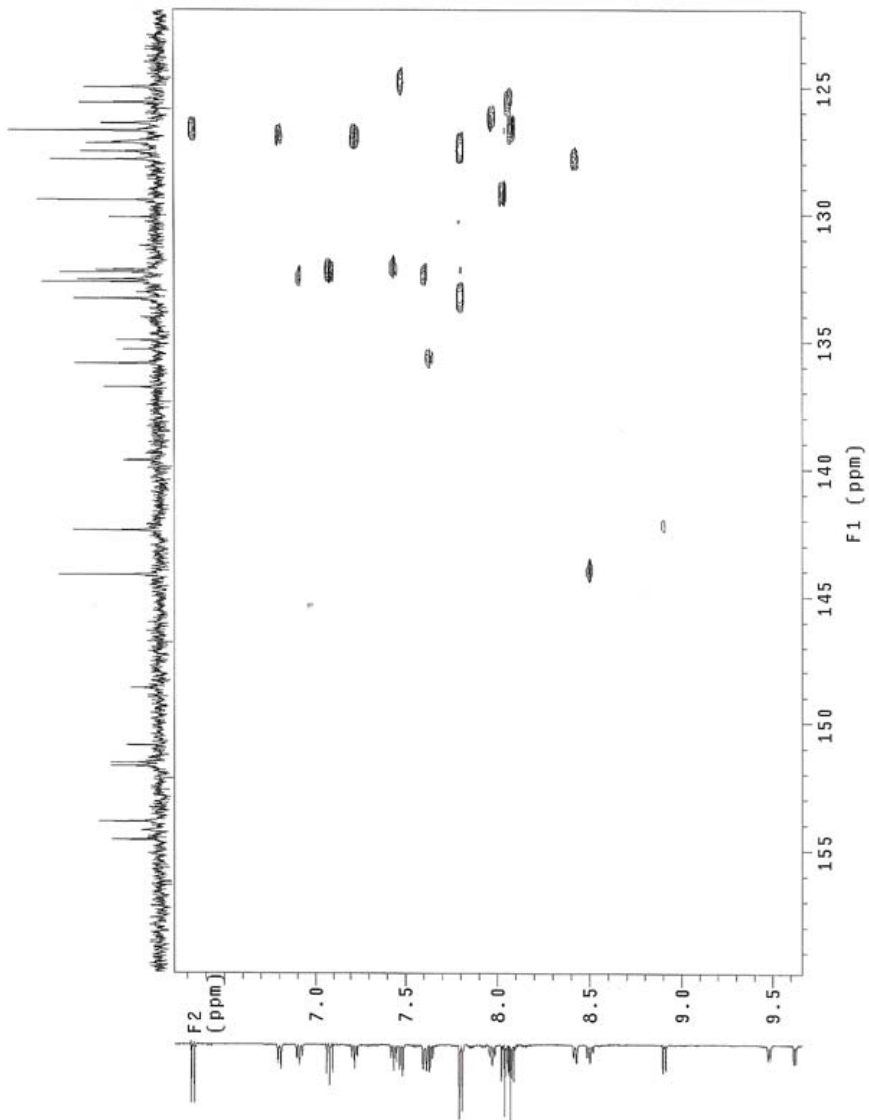

HSQC (acetonitrile-*d*<sub>3</sub>, 23 °C) of 1

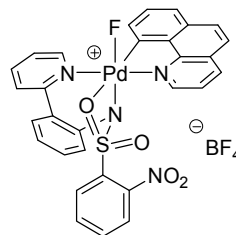



## STANDARD PROTON PARAMETERS

Data Collected on: spect-100500  
 Archive directory: /export/home/ds2/vnmrSYS/data  
 Sample directory:

File: Pd4FMeCN\_HMBC

Pulse Sequence: gHMBC

Solvent: CD3CN

Temp: 23.0 C / 296.1 K

User: 1-14-87

Relax. delay 1.000 sec

Acq. time 0.248 sec

Width 4129.2 Hz

Offset 50194.5 Hz

8 repeats

400 increments

OBSERVE H1, 499.6111450 MHz

DATA PROCESSING

SI line bell 0.124 sec

F2 DATA PROCESSING

FT size 2048 X 2098

Total time 1 hr, 11 min

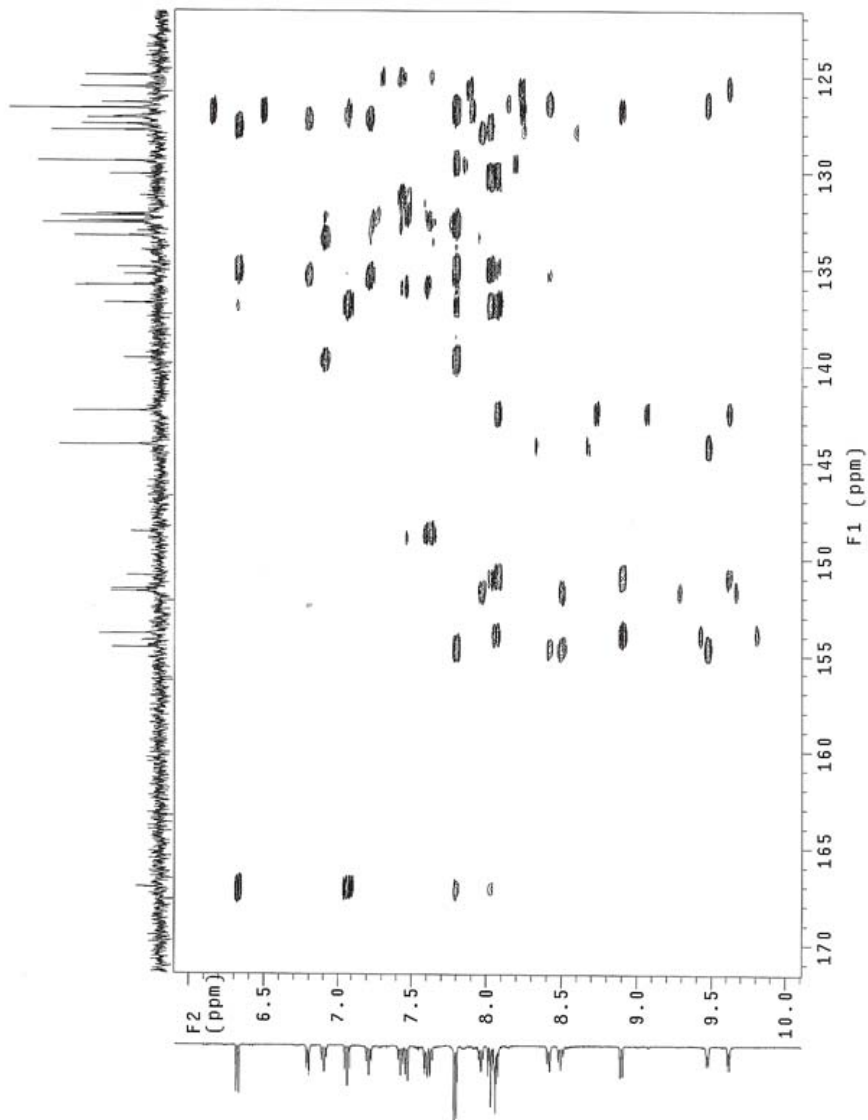

HMBC (acetonitrile-*d*<sub>3</sub>, 23 °C) of 1

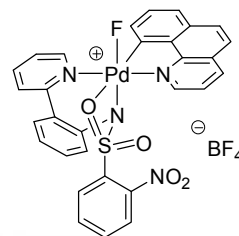

## STANDARD PROTON PARAMETERS

Pulse Sequence: NOESY

Solvent: CD3CN  
Temp: 23.0 C / 296.1 K  
INOVA-500 -Inova500-Relax. delay 1.000 sec  
Waltz16 0.000 sec  
Acq. Time 0.128 sec  
Width 4013.0 Hz  
2D Width 4013.0 Hz  
4 repetitions0.2 x 200 increments  
Observed 39.6111450 MHz  
DATA PROCESSING  
Gauss apodization 0.059 sec  
F1 DATA PROCESSING  
Gauss apodization 0.046 sec  
FT size 2048 x 2048  
Total time 42 min, 28 sec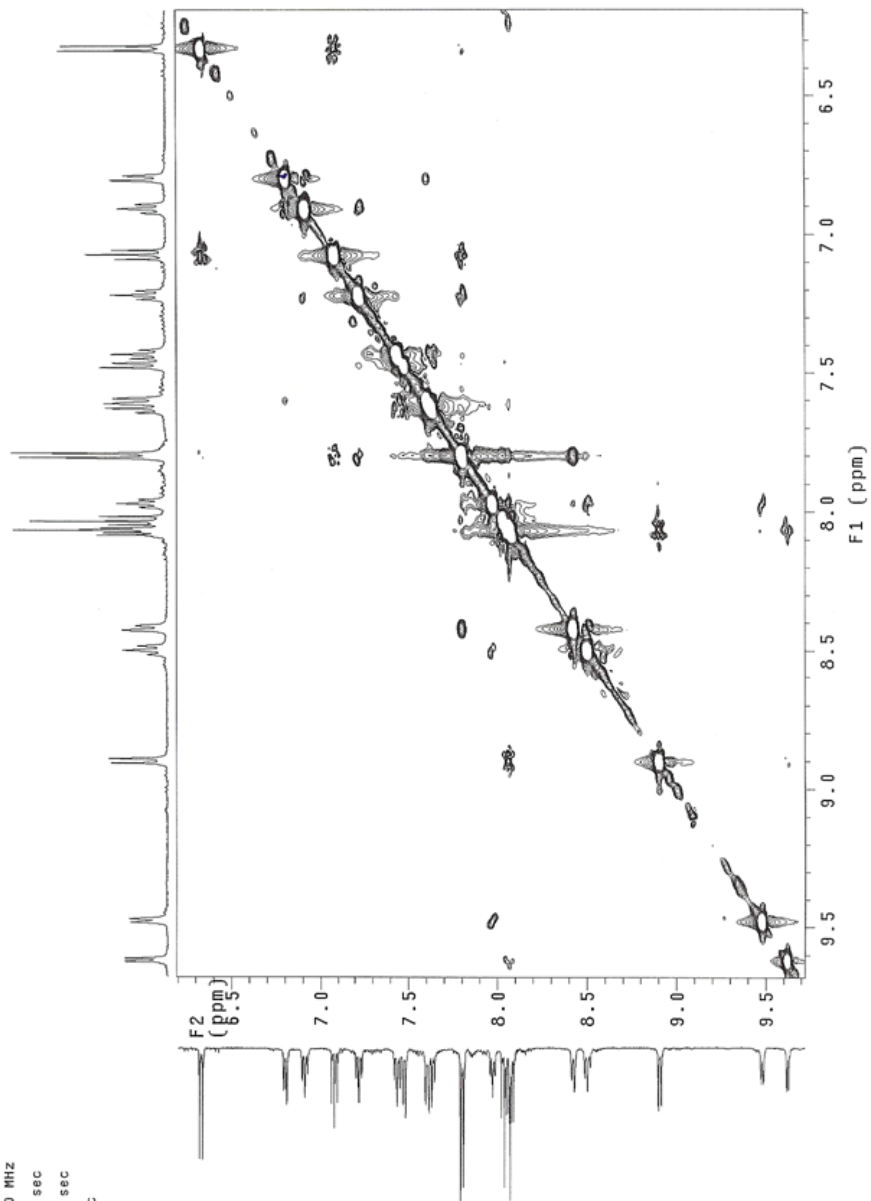NOESY (acetonitrile-*d*<sub>3</sub>, 23 °C) of 1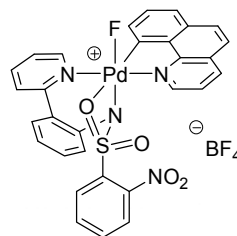

$^1\text{H}$  NMR (acetonitrile- $d_3$ ,  $-15\text{ }^\circ\text{C}$ ) of **2**

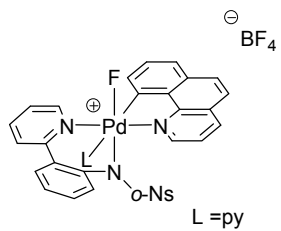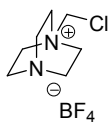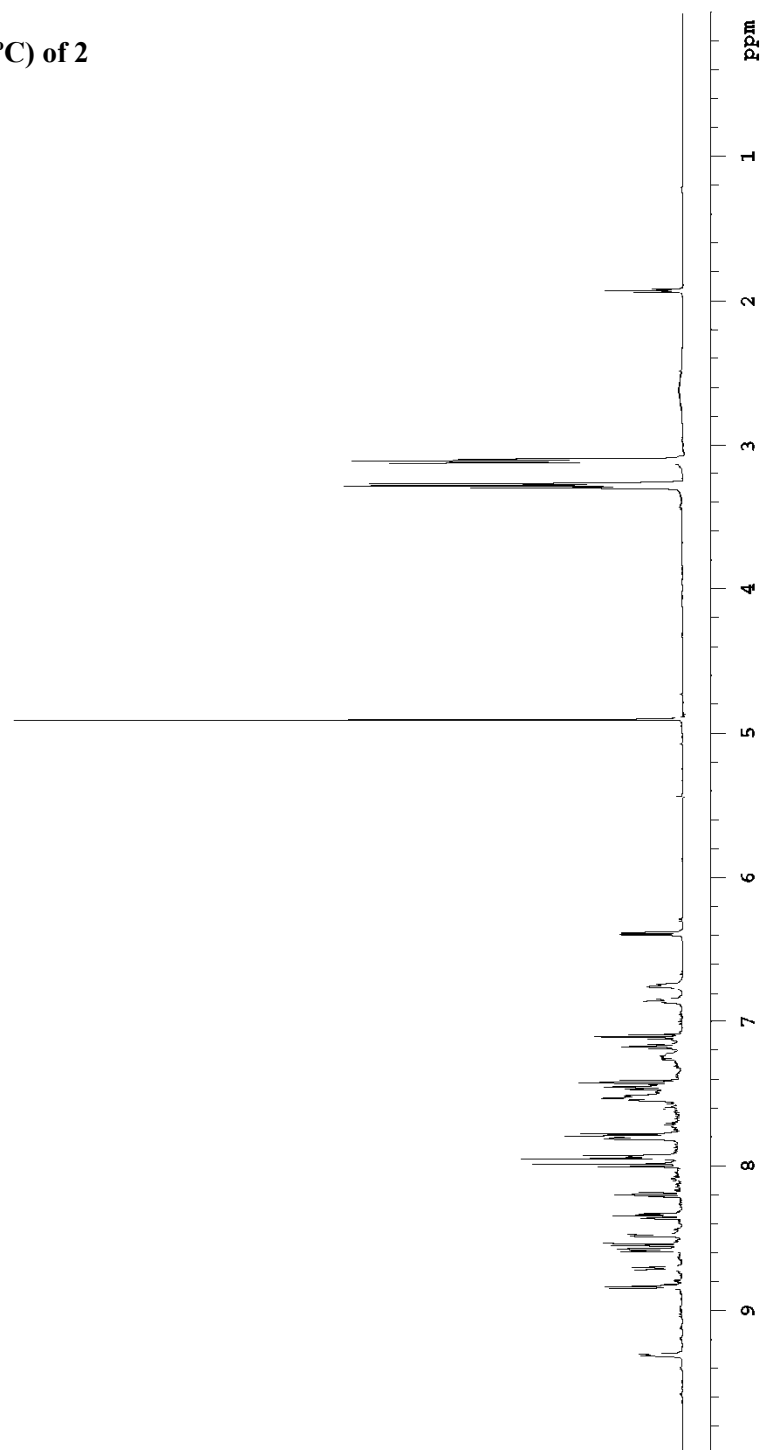

$^{13}\text{C}$  NMR (acetonitrile- $d_3$ ,  $-15^\circ\text{C}$ ) of **2**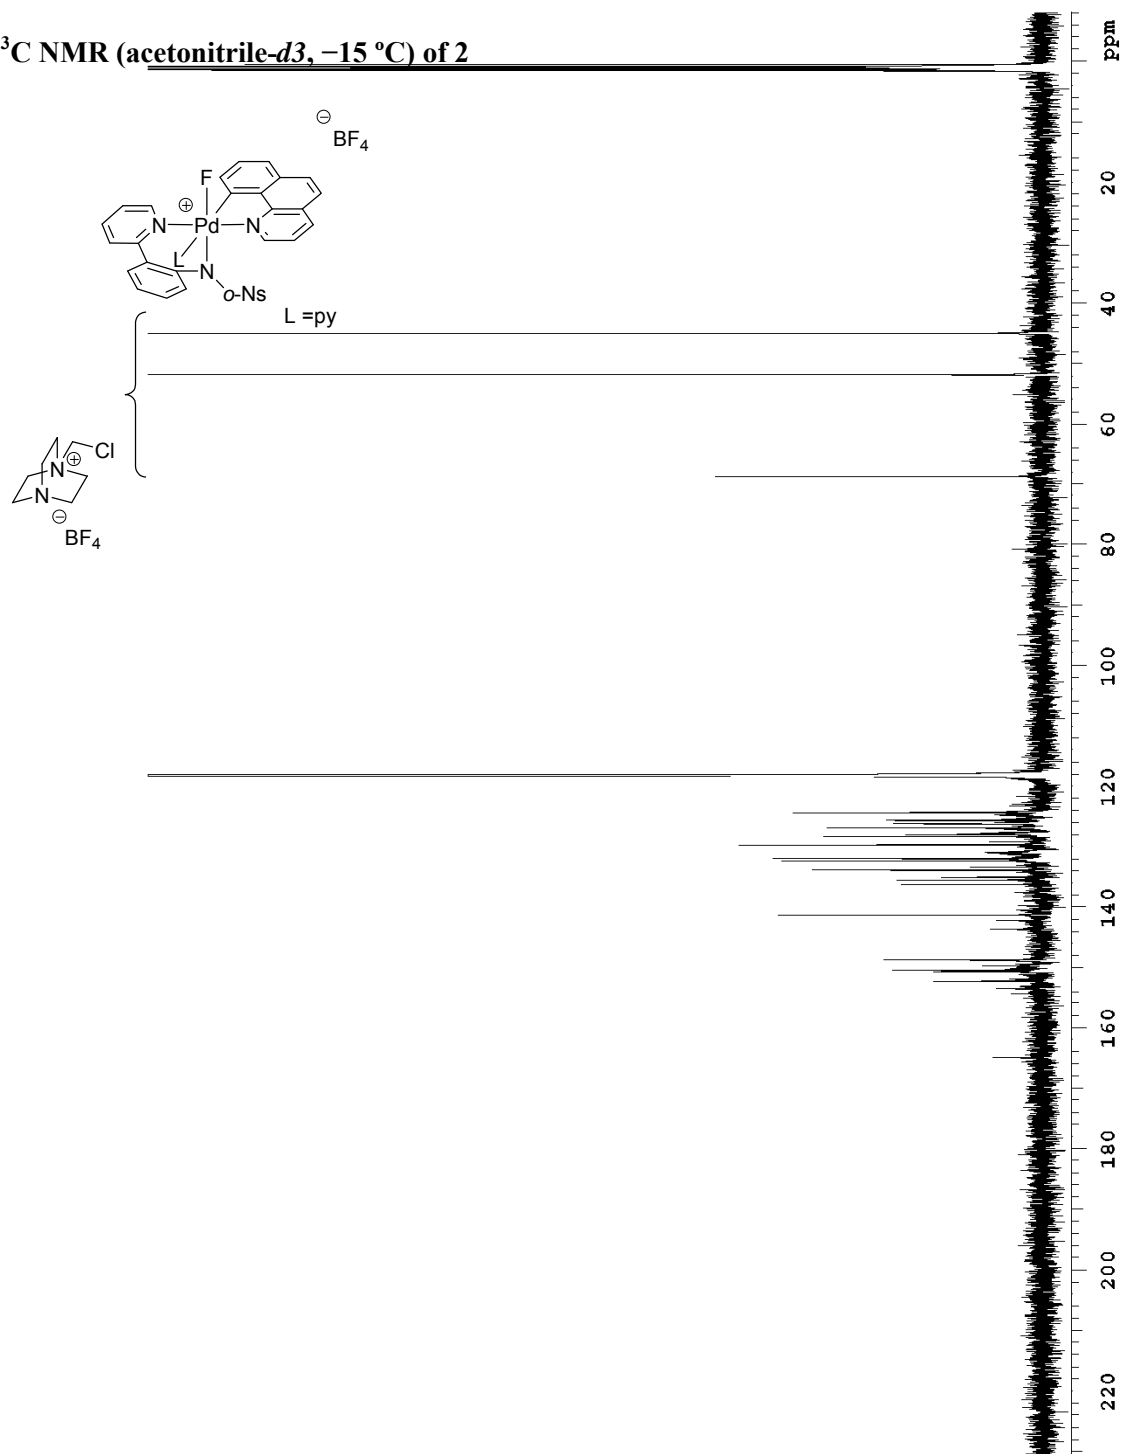

Pd4FPy\_H  
 Data Collected on:  
 nmrsun2-Inova500  
 Acq. name: /home/dj2/vnmr/sy5/data  
 Sample directory:

File: Pd4FPy\_COSY

Pulse Sequence: gCOSY  
 Solvent: CD3CN

Temp. -15.0 C / 258.1 K

Relax. delay 1.000 sec

Acq. time 0.128 sec

Width 8000.0 Hz

2D Width 8000.0 Hz

Single scans

300 experiments

OBSERVE F1 500.1765938 MHz

DATA PROCESSING

Sq. sine bell 0.064 sec

F1 DATA PROCESSING

Sq. sine bell 0.016 sec

F1 size 2048 x 2048

Total time 2 min

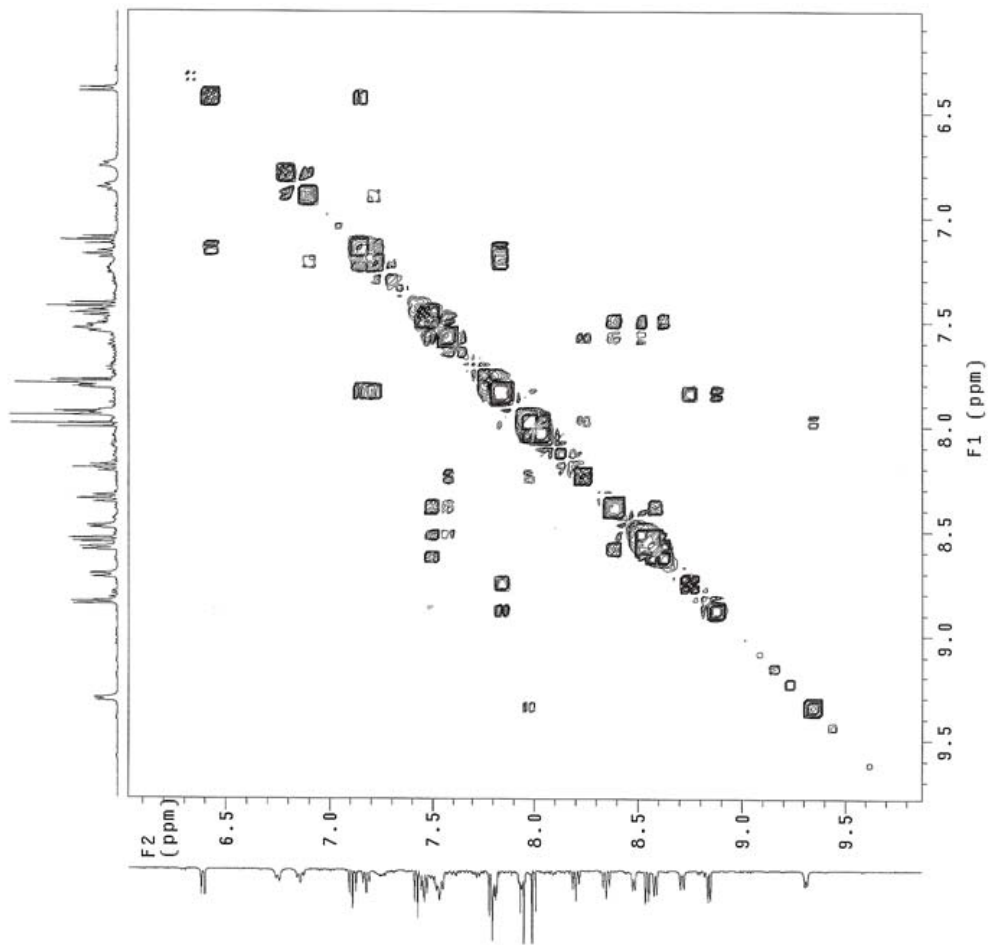

$^1\text{H}$ - $^1\text{H}$  COSY (acetonitrile- $d_3$ , -15 °C) of 2

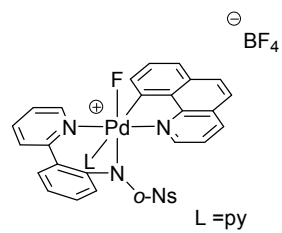

Pd4FPy\_H  
 Data Collected on:  
 rsmun2-inova500  
 Acquisition  
 /export/home/d32/vnmrSYS/data

Sample directory:

File: Pd4FPy\_HSQC

Pulse Sequence: gHSQC

Solvent: CD3CN

Temp: -15.0 C / 258.1 K

User: 1-14-87

Relax. delay 1.000 sec

Acq. time 0.128 sec

Width 8000.0 Hz

20 Width 21378.9 Hz

Resolution 128 increments

2 x 128 increments

OBSERVE H1, 500.1766278 MHz

DECOUPLE C13, 125.7788073 MHz

Power 45 dB

on during acquisition

during delay

and

GARP- during delay

DATA PROCESSING

Gauss apodization 0.059 sec

F1 DATA PROCESSING

Gauss apodization 0.011 sec

FT size 2048 x 2048

Total time 21 min

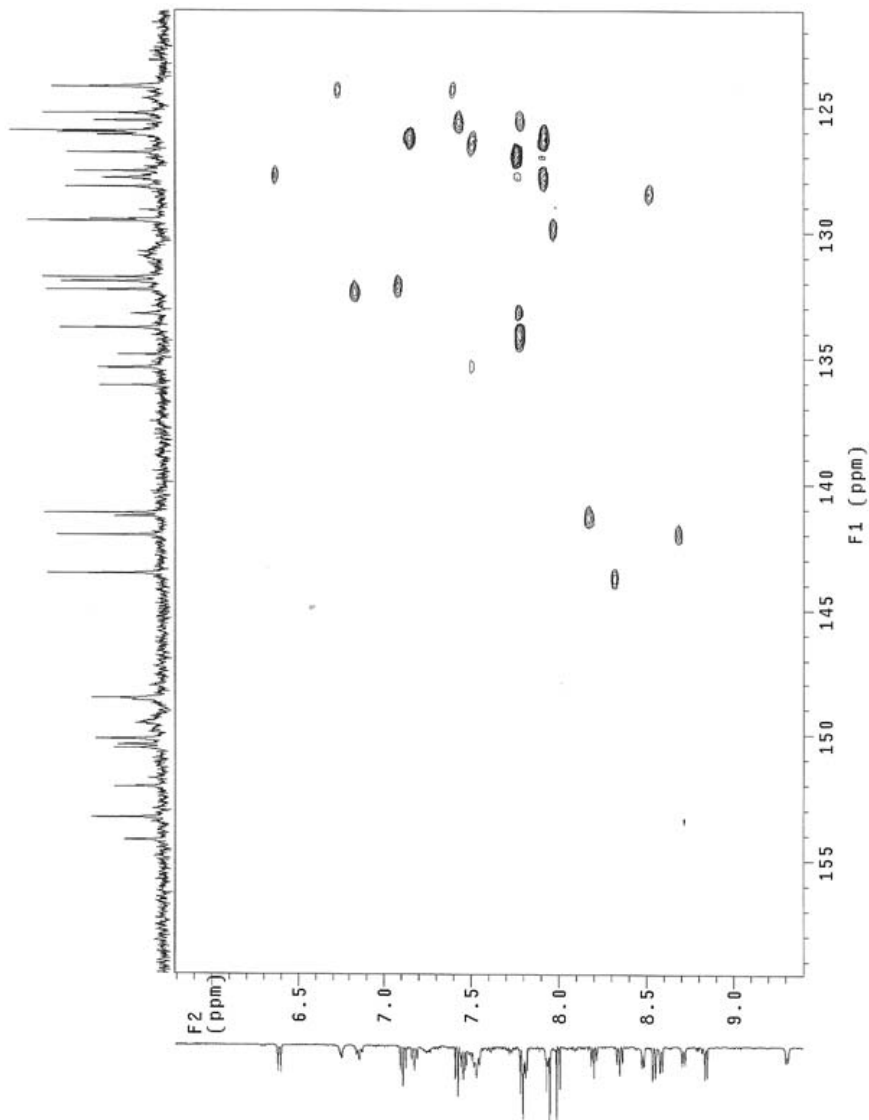

HSQC (acetonitrile-*d*<sub>3</sub>, -15 °C) of 2

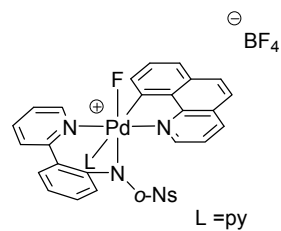

Pd4FPy\_H  
 Data Collected on:  
 nmrsun2-1nova500  
 Acquisition  
 /export/home/d12/vnmrsys/data

Sample directory:

File: Pd4FPy\_HMBC

Pulse Sequence: gHMBC

Solvent: CD3CN

Temp: 15.0 C / 256.1 K

User: 1-14-87

Relax. delay 1.000 sec

Acq. time 0.128 sec

Width 8000.0 Hz

2D Width 30188.7 Hz

Time 0.000 sec

400 increments

OBSERVE H1, 500.1766219 MHz

DATA PROCESSING

Sine bell 0.064 sec

F1 DATA PROCESSING

Sine bell 0.000 sec

F2 time 0.206 sec

Total time 1 hr, 5 min

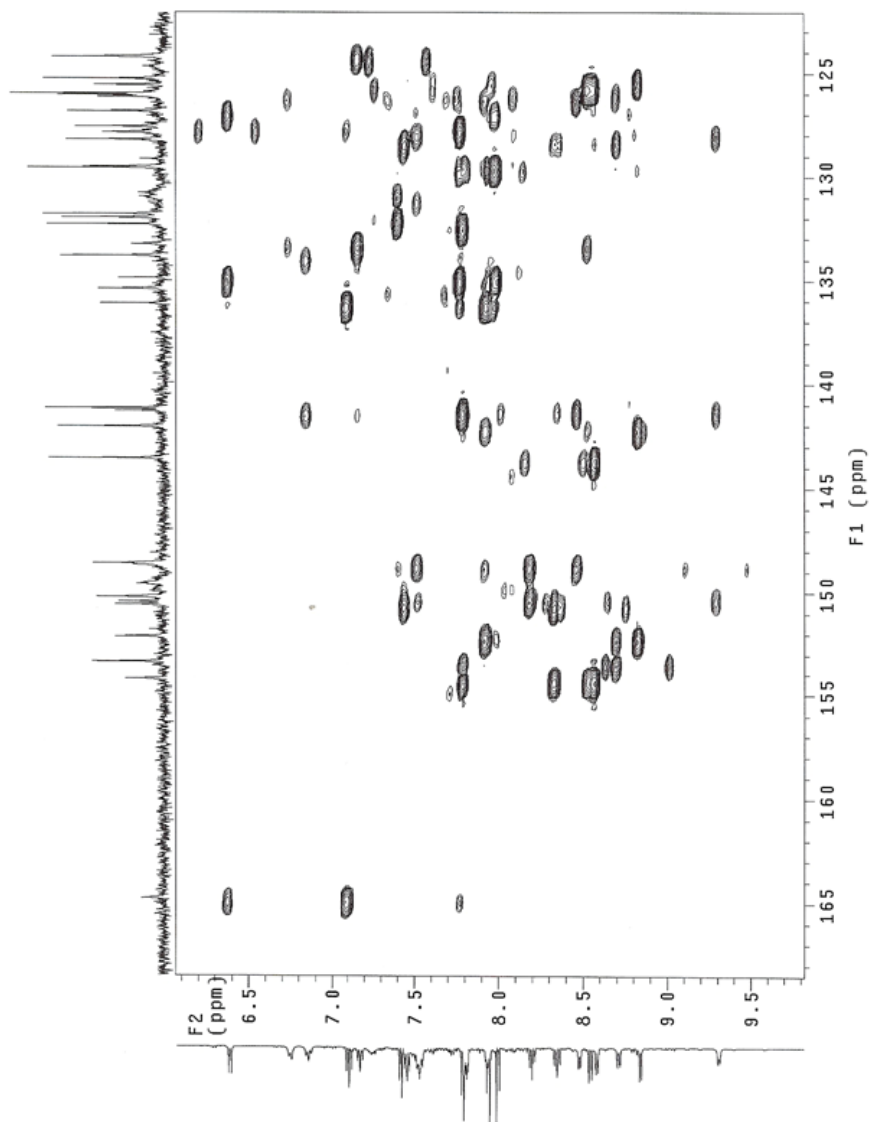

HMBC (acetonitrile-*d*3, -15 °C) of 2

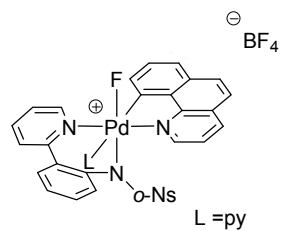

## STANDARD PROTON PARAMETERS

Data Collected on:  
nmrsm2-1nova500  
Acq. file:  
/export/home/d32/vnmrSYS/data

Sample directory:

File: 0C\_Pd4FPy\_NOESY

Pulse Sequence: NOESY

Solvent: CD3CN

Temp. 0.0 C / 273.1 K

Relax. delay 1.000 sec

Mixing 0.400 sec

Acq. time 0.128 sec

Width 4012.8 Hz

2D Width 4012.8 Hz

2 x 200 increments

OBSERVE H1, 500.1766216 MHZ

DATA PROCESSING

Gauss apodization 0.059 sec

F1 DATA PROCESSING

Gauss apodization 0.046 sec

F2 apodization 0.046 sec

Total time 21 min

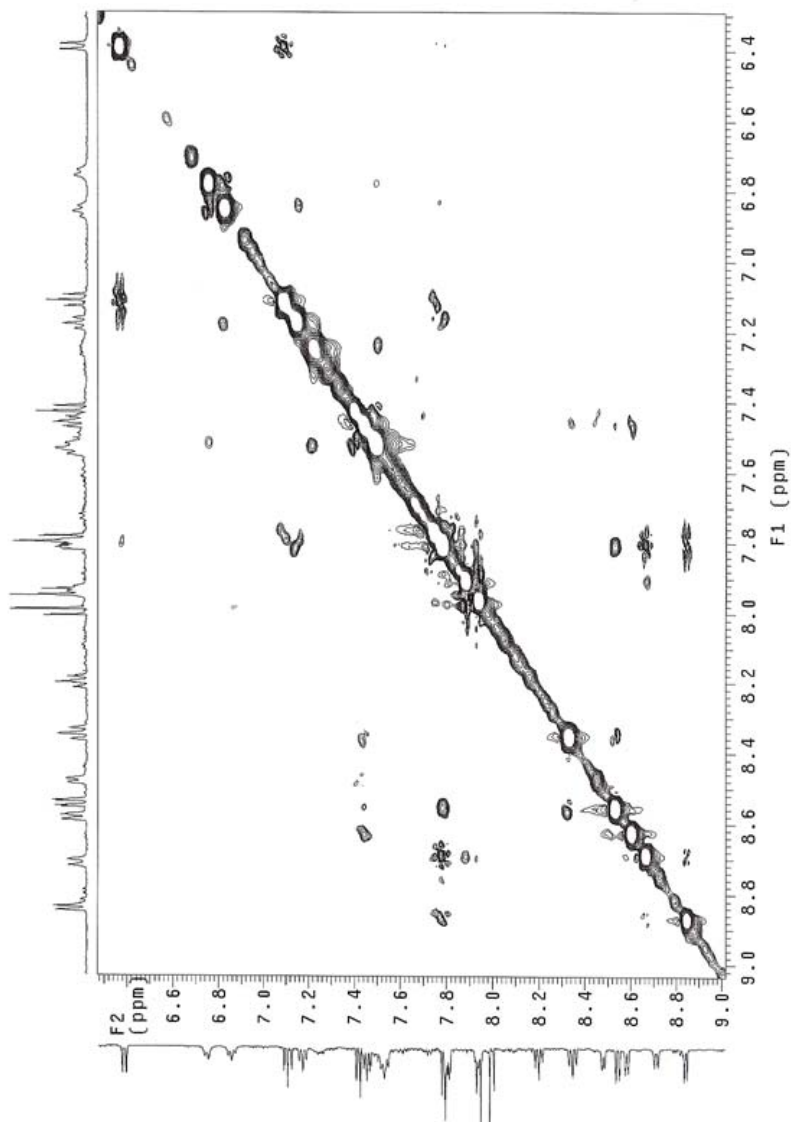

NOESY (acetonitrile-*d*<sub>3</sub>, -15 °C) of 2

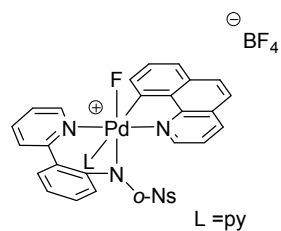



$^1\text{H}$  NMR (DMSO- $d_6$ , 23 °C) of **3**

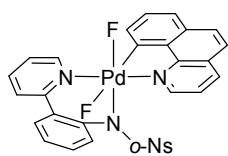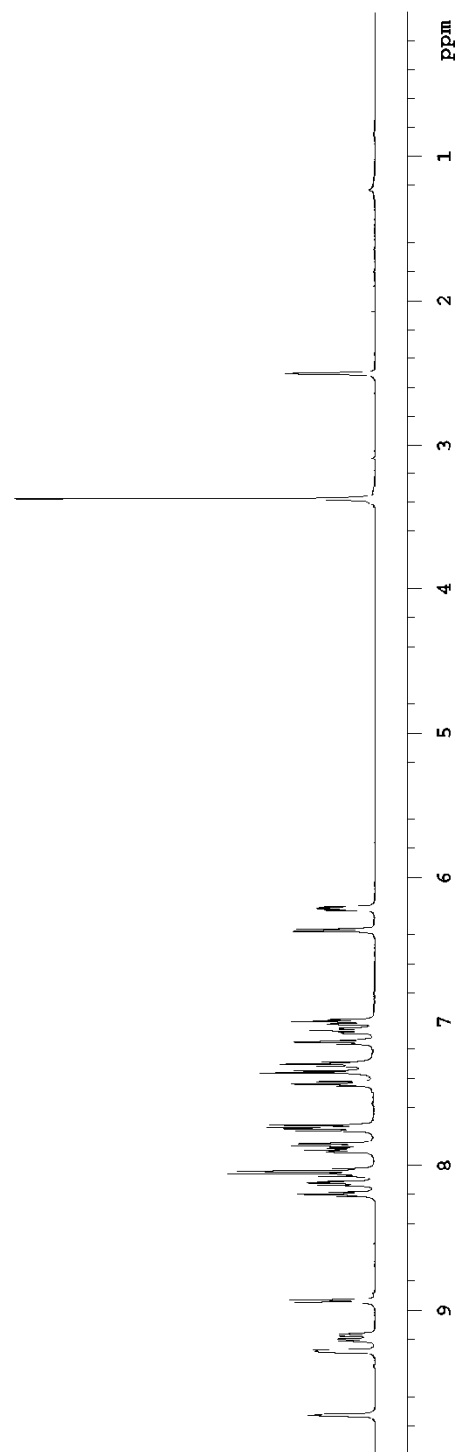

$^{13}\text{C}$  NMR (DMSO-*d*<sub>6</sub>, 23 °C) of **3**

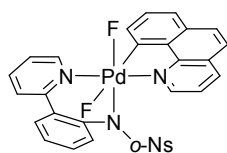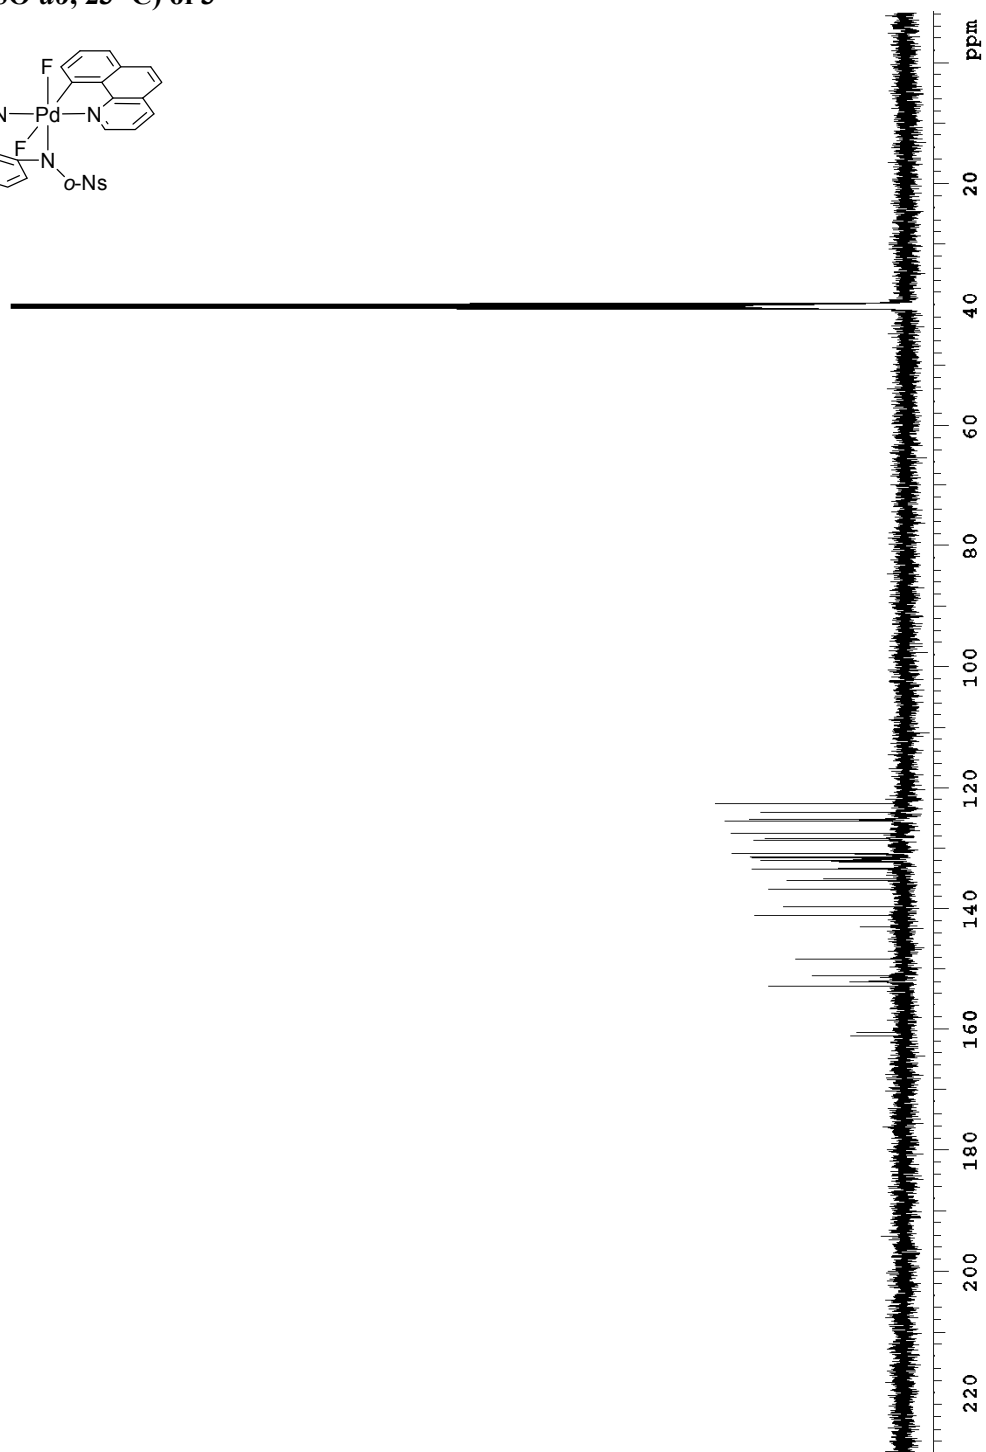

## STANDARD PROTON PARAMETERS

Pulse Sequence: gCOSY  
 Solvent: DMSO  
 Temp: 23.0 C / 295.1 K  
 INOVA-500 "Inova5000u"  
 Relax. delay 1.000 sec  
 Acq. time 0.215 sec  
 Width 2382.3 Hz  
 2D Width 2382.3 Hz  
 Single scan  
 Acquisition  
 OASER: 500.1763237 MHz  
 DATA PROCESSING  
 F1: sine bell 0.107 sec  
 F1 DATA PROCESSING  
 Sg. sine bell 0.027 sec  
 F1 size 1024 x 1024  
 Total time 3 min, 0 sec

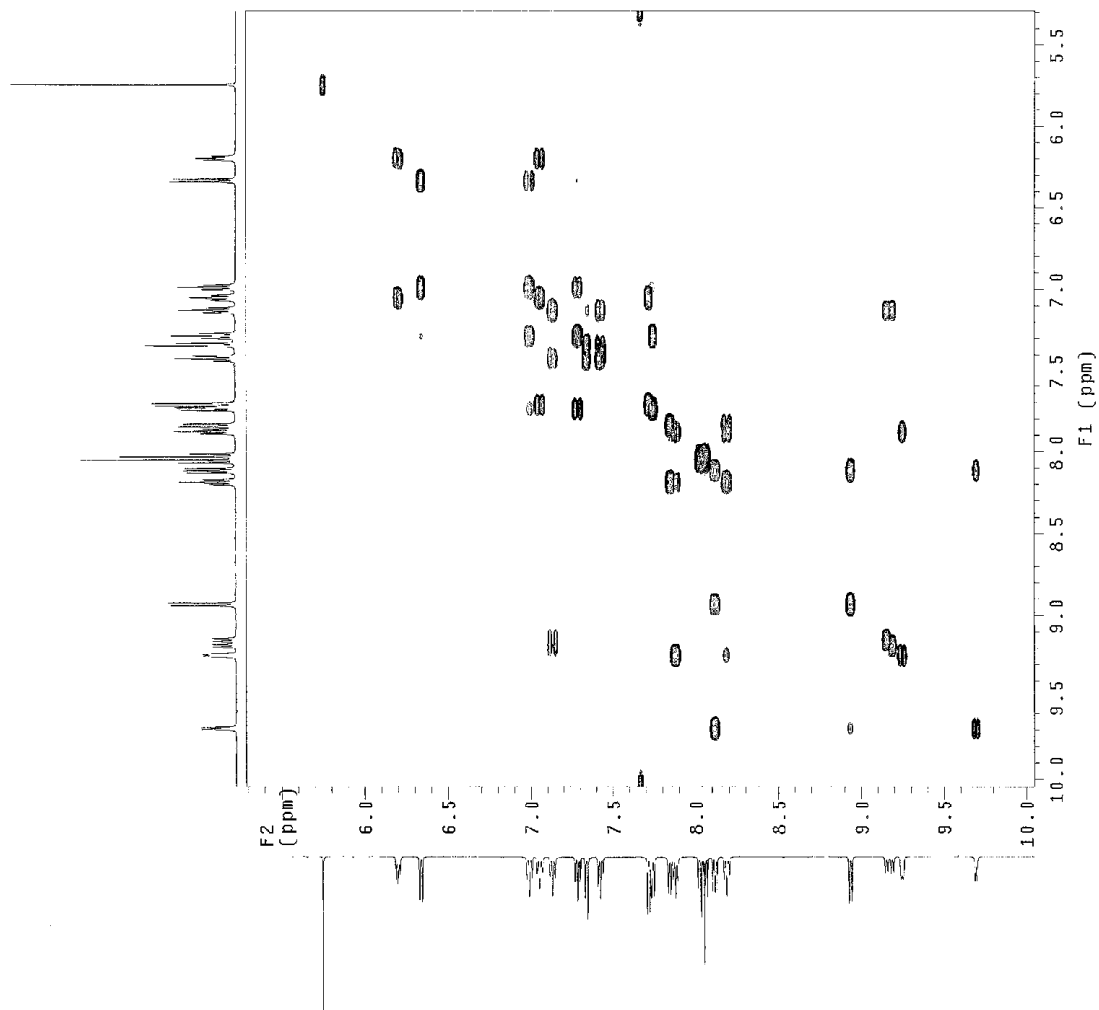 $^1\text{H}$ - $^1\text{H}$  COSY (DMSO- $d_6$ , 23 °C) of **3**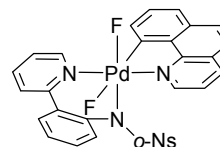

## STANDARD PROTON PARAMETERS

Pulse Sequence: ghsqc  
 Solvent: DMSO  
 Temp: 23.0 C / 296.1 K  
 User: 1-14-87  
 File: PdF2\_HMQC  
 INOVA-500 <sup>1</sup>Hmrsun<sup>h</sup>

Relax. delay 1.000 sec  
 Acq. time 0.215 sec  
 F2 width 28001.4 Hz  
 10 repetitions  
 2 x 128 increments  
 OBSERVE H1, 500.1763237 MHz  
 DECOUPLE C13, 125.7613562 MHz  
 Power 45 db/acquisition  
 ref during delay  
 GARP-1 modulated  
 DATA PROCESSING  
 Gauss apodization 0.080 sec  
 F1 DATA PROCESSING 0.020 sec  
 Gauss apodization 0.020 sec  
 F2 time 0.048, 2048  
 Total time 1 hr, 27 min, 56 sec

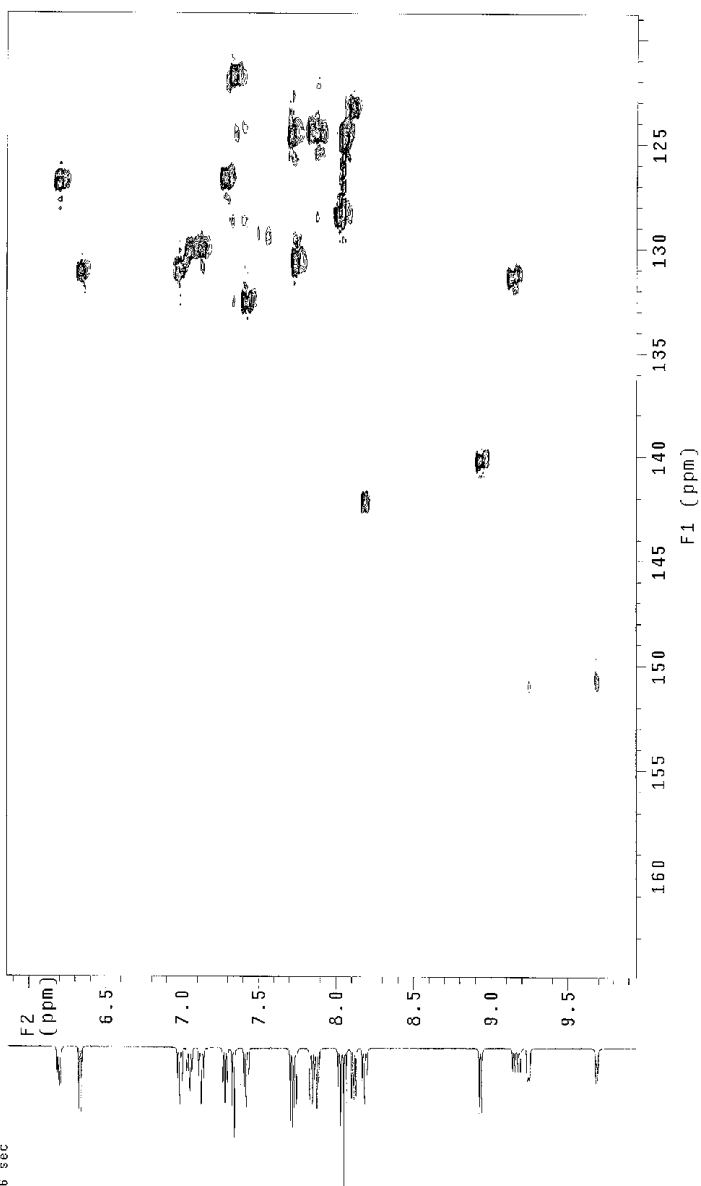HSQC (DMSO-*d*<sub>6</sub>, 23 °C) of 3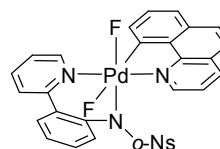

HMBC

Pulse Sequence: gHMBC  
 Solvent: DMSO  
 Temp: 23.0 C / 296.1 K  
 User: 1-14-87  
 File: Pd4F2\_HMBC  
 INOVA-500 <sup>2</sup>Hmrsun<sup>o</sup>

Relax. delay 1.000 sec  
 Acq. time 0.215 sec  
 Width 30968.7 Hz  
 20.000 MHz  
 40 repetitions  
 400 increments  
 OBSERVE H1, 500.1763237 MHz  
 DATA PROCESSING  
 SINE REP  
 F2 (ppm) 0.000 sec  
 FT size 2048 x 2048  
 Total time 5 hr, 47 min, 43 sec

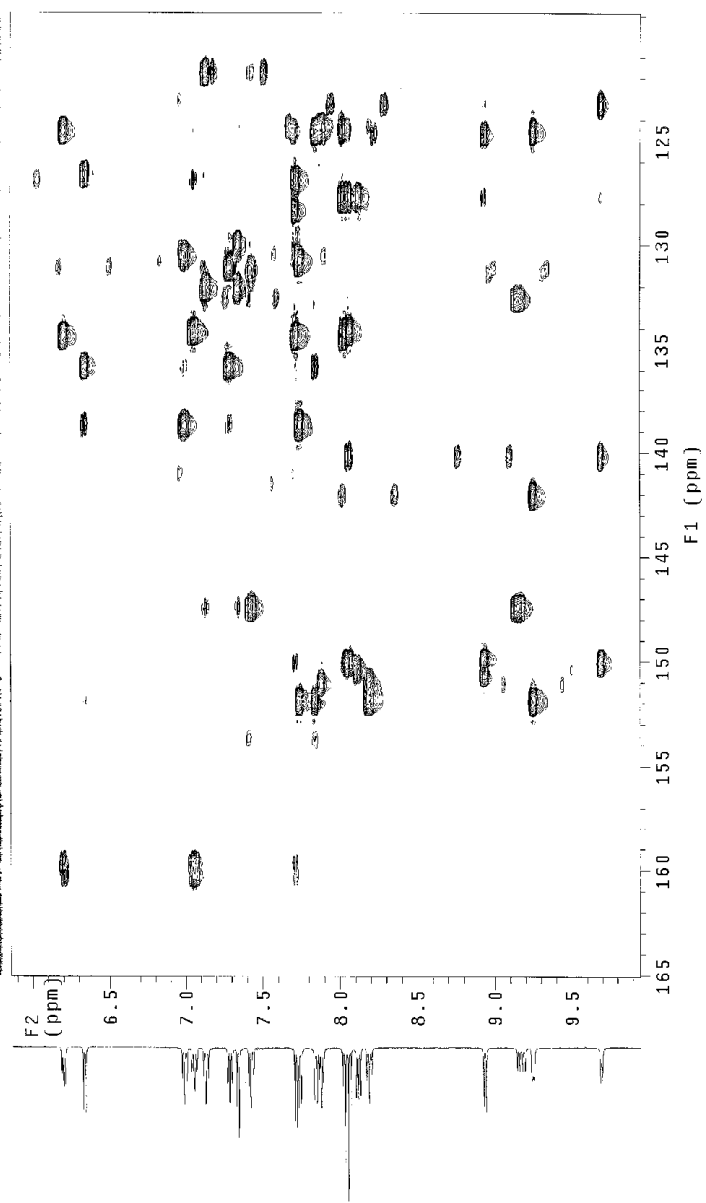HMBC (DMSO-*d*<sub>6</sub>, 23 °C) of 3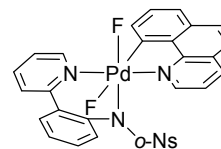

## STANDARD CARBON PARAMETERS

Pulse Sequence: gCOSY  
 Solvent: DMSO  
 Temperature: 23  
 User: 1-10-87  
 INOVA-500 "inova500b"  
 Relax. delay 1.000 sec  
 Acq. time 0.015 sec  
 Width 63085.1 Hz  
 2D Width 63085.1 Hz  
 2D F2 scans  
 2D F1 scans  
 2D F2 channels  
 OBSERVE F1 470.6361489 MHZ  
 DATA PROCESSING  
 Sg. sine bell 0.120 sec  
 F1 DATA PROCESSING  
 Sg. sine bell 0.002 sec  
 F1 size 2048 x 2048  
 Total time 2 min, 23 sec

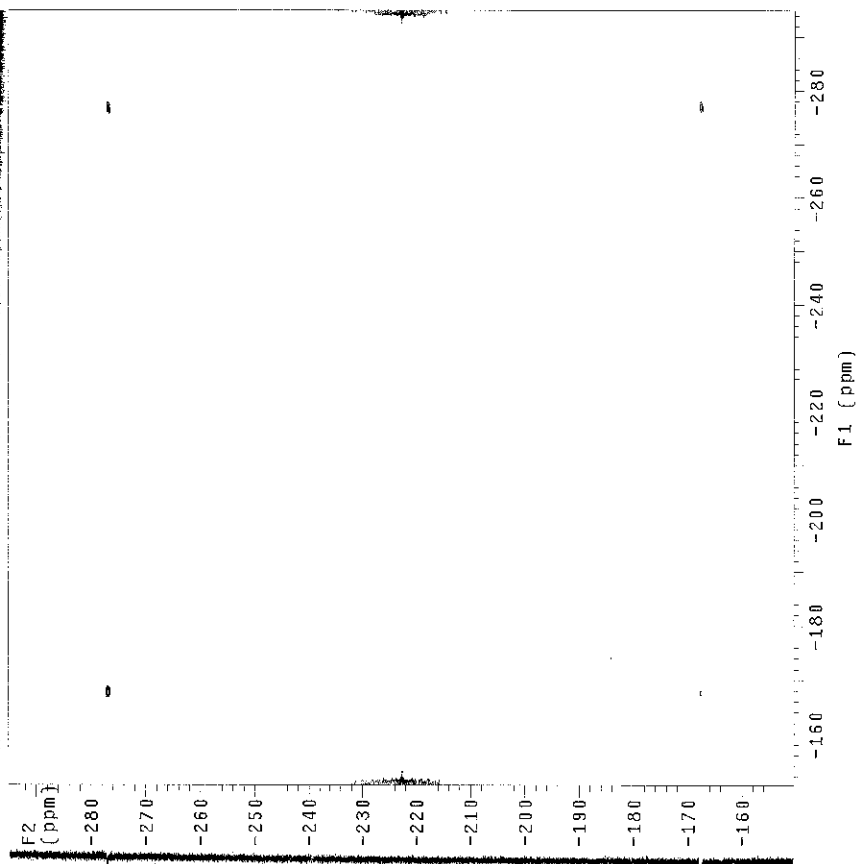

$^{19}\text{F}$ - $^{19}\text{F}$  COSY (DMSO-*d*<sub>6</sub>, 23 °C) of 3

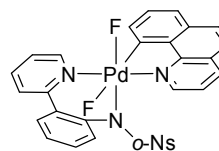

## STANDARD PROTON PARAMETERS

Data Collected On: 11/10/00  
 Instrument: spect  
 Archive directory: /export/home/ds2/vmar/sys/data  
 Sample directory:

File: Pd4F2\_NOESY0.4

Pulse Sequence: NOESY

Solvent: DMSO

Temp. 22.0 C / 295.1 K

Relax. delay 1.000 sec

Mixing 0.400 sec

Acq. time 0.430 sec

Width 2382.3 Hz

Depth 20.000 Hz

16 repetitions

2 x 200 increments

OBSERVE H1, 500.1765237 MHZ

DATA PROCESSING

Gauss apodization 0.099 sec

FT size 2048 x 2048

Total time 3 hr, 21 min

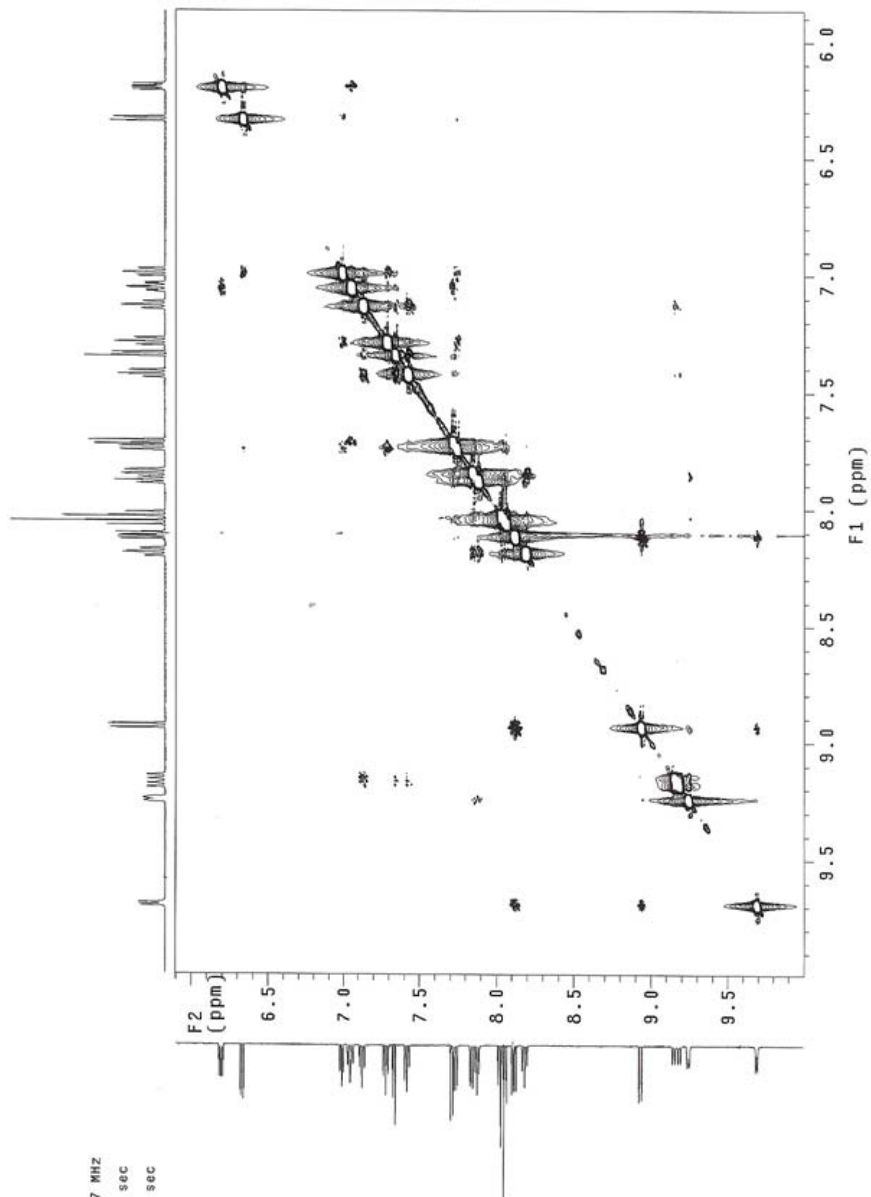

NOESY (DMSO-*d*<sub>6</sub>, 23 °C) of 3

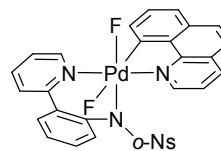

## STANDARD PROTON PARAMETERS

Pulse Sequence: hom2dj  
 Solvent: DMSO  
 Temp: 22.0 C / 285.1 K  
 File: 2dj  
 INOVA-500 "nucsun"

Relax. delay 1.000 sec  
 Mix. 0.400 sec  
 Acq. time 0.860 sec  
 Width 2382.3 Hz  
 2D Width 50.0 Hz  
 8 repetitions

Observations: 500.1763237 MHz  
 DATA PROCESSING  
 Sine bell 0.107 sec  
 F1 DATA PROCESSING  
 Sine bell 0.640 sec  
 FT size 2048 x 256  
 Total time 21 min, 49 sec

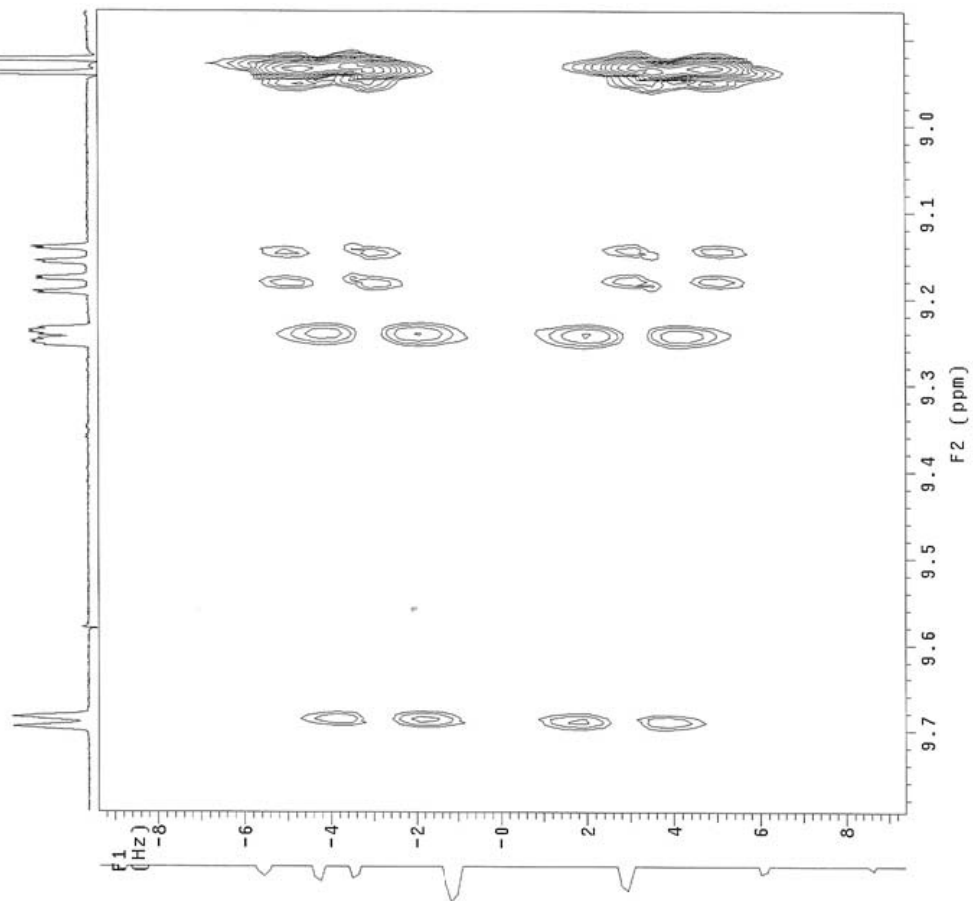HOM2DJ (DMSO-*d*<sub>6</sub>, 23 °C) of 3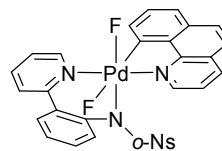



## STANDARD PROTON PARAMETERS

Pulse Sequence: hom2dJ

Solvent: DMSO

Temp: 22.0 C / 295.1 K

F1: 500

INOVA-500 "nucsum"

Relax. delay: 1.000 sec

Mixing: 0.400 sec

Acq. time: 0.860 sec

Width: 2382.3 Hz

2D Width: 50.0 Hz

8 repetitions

Observance: 500.1765237 MHz

DATA PROCESSING

Sine bell: 0.107 sec

F1 DATA PROCESSING

Sine bell: 0.640 sec

F1 size: 2048 x 256

Total time: 21 min, 49 sec

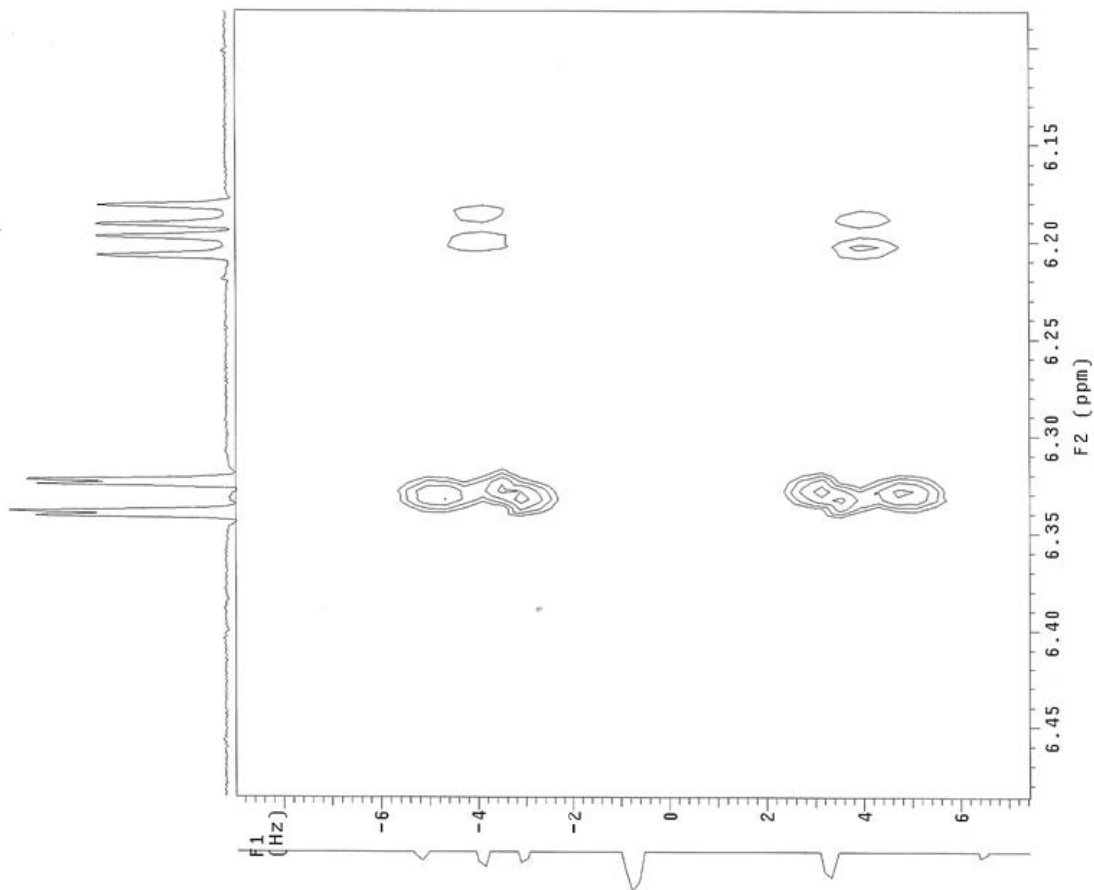HOM2DJ (DMSO-*d*<sub>6</sub>, 23 °C) of 3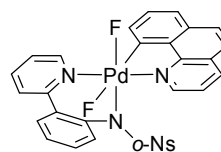

$^1\text{H}$  NMR (acetonitrile- $d_3$ ) of 1 and 2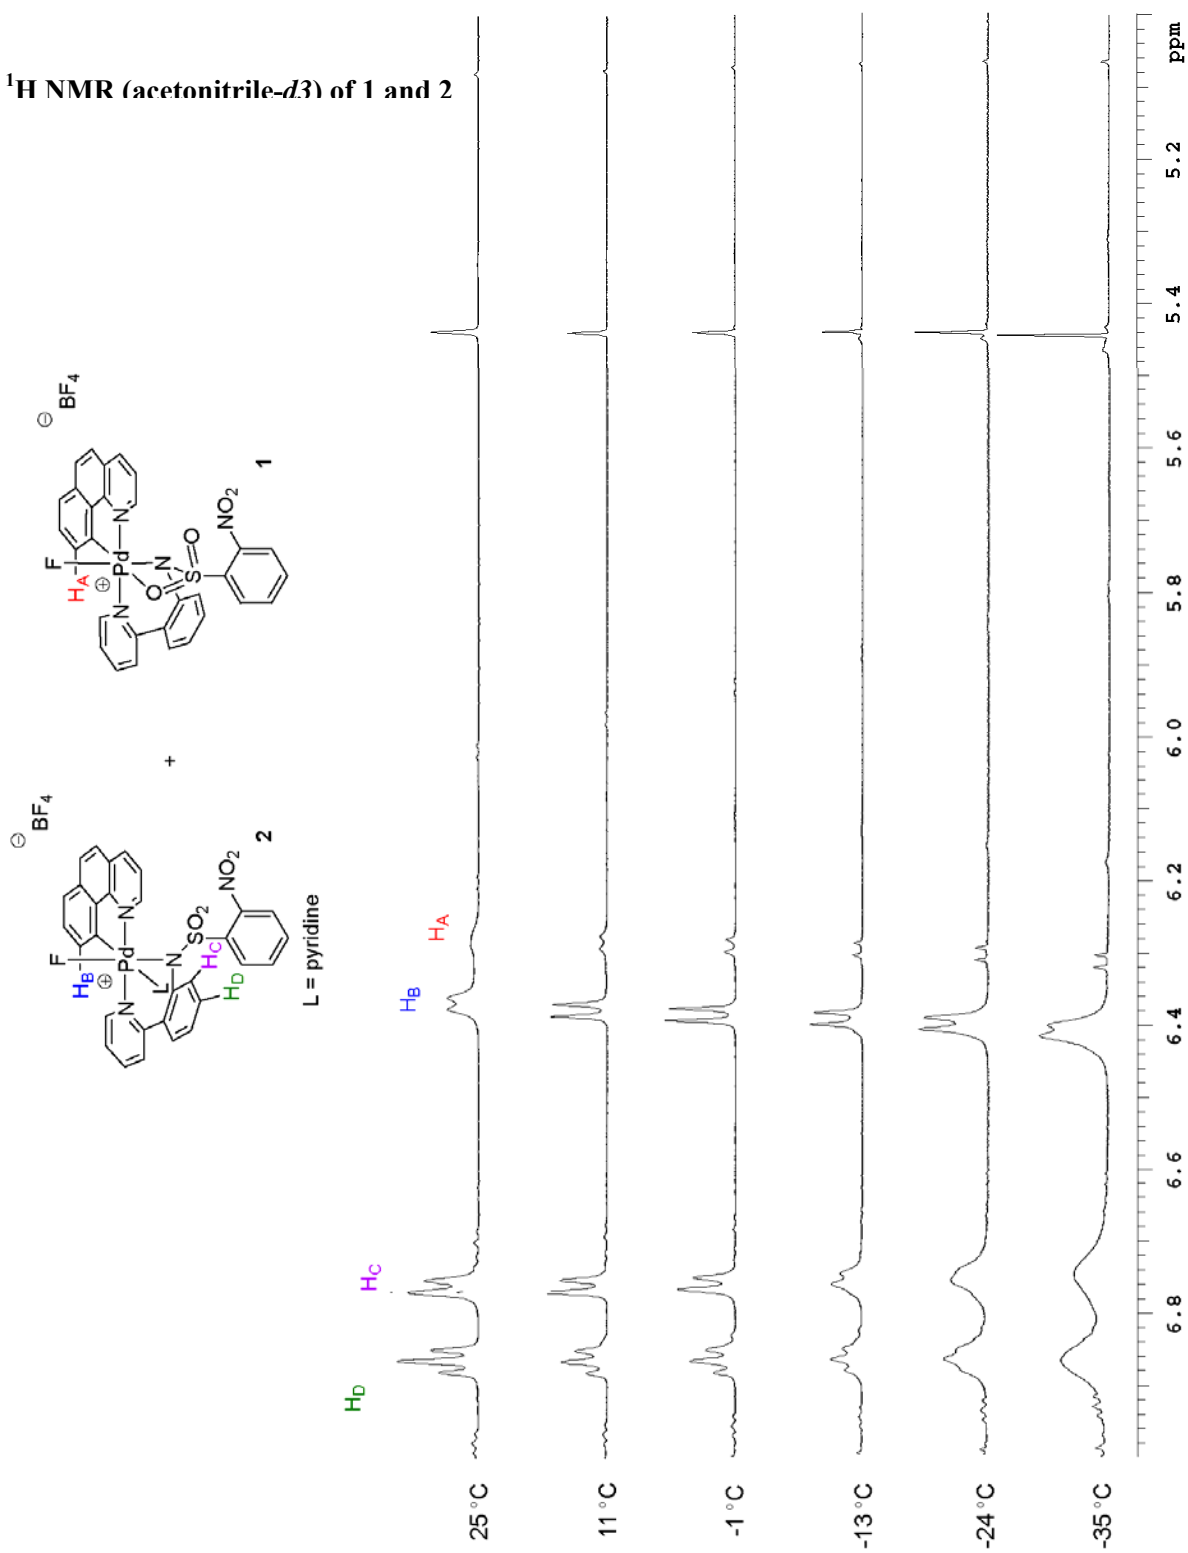

$^1\text{H}$  NMR (acetonitrile- $d_3$ , 23 °C)

of the reaction from 1 to 5

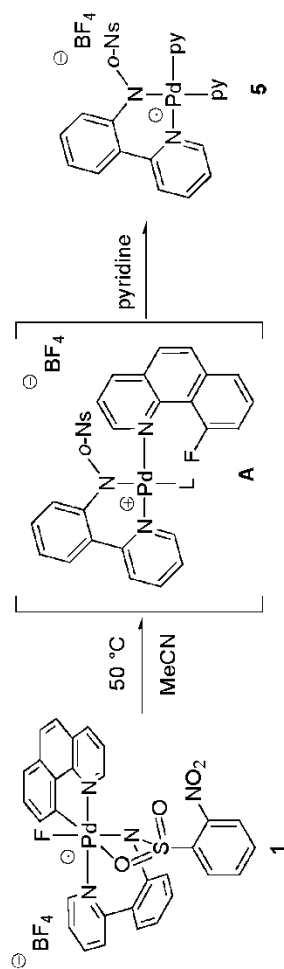

authentic sample of 5

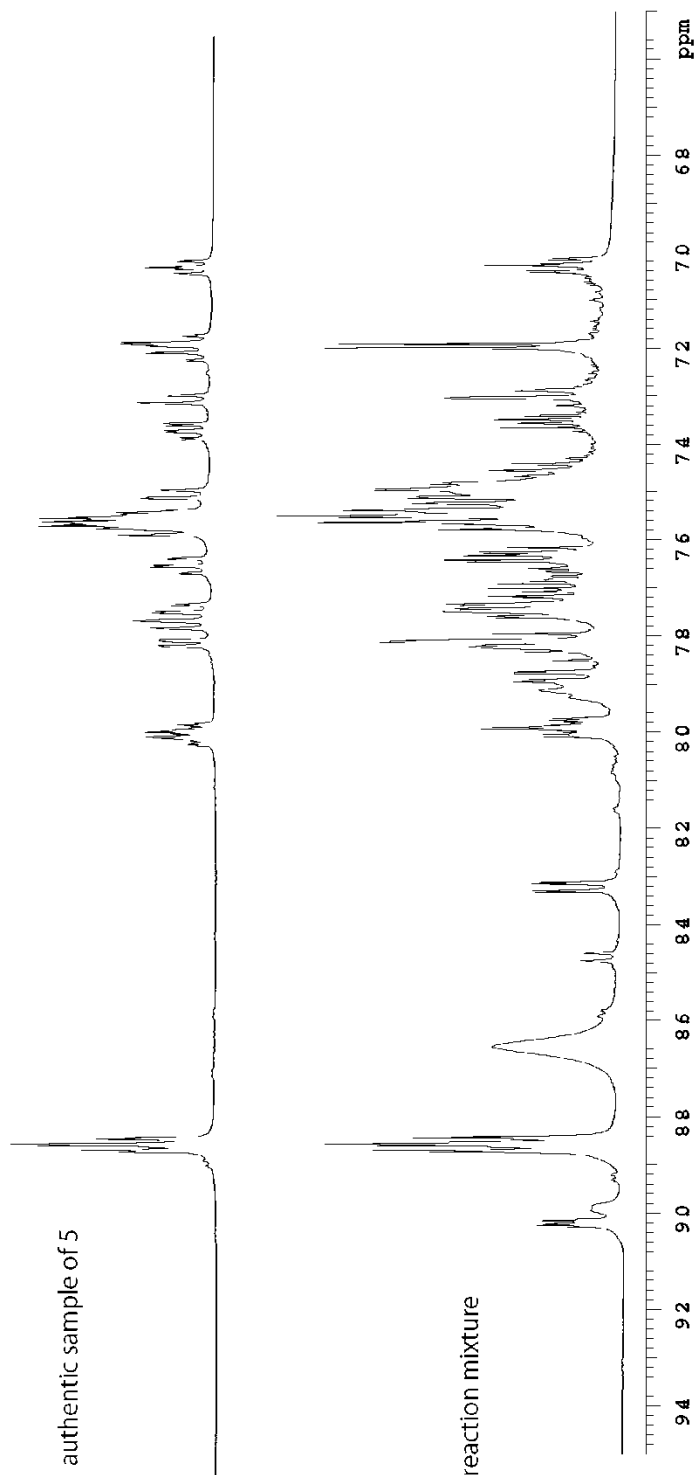

reaction mixture

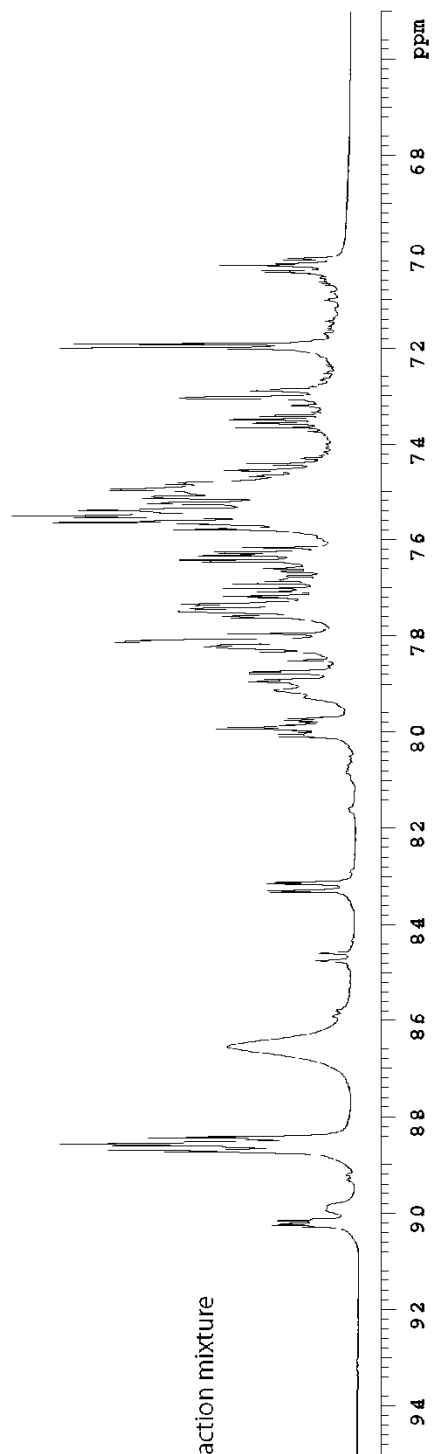

$^{13}\text{C}$  NMR (acetonitrile- $d_3$ , 23 °C)

of the reaction from 1 to 5

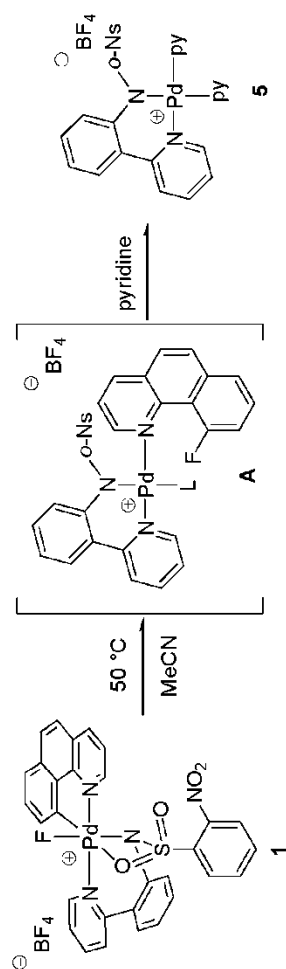

authentic sample of 5

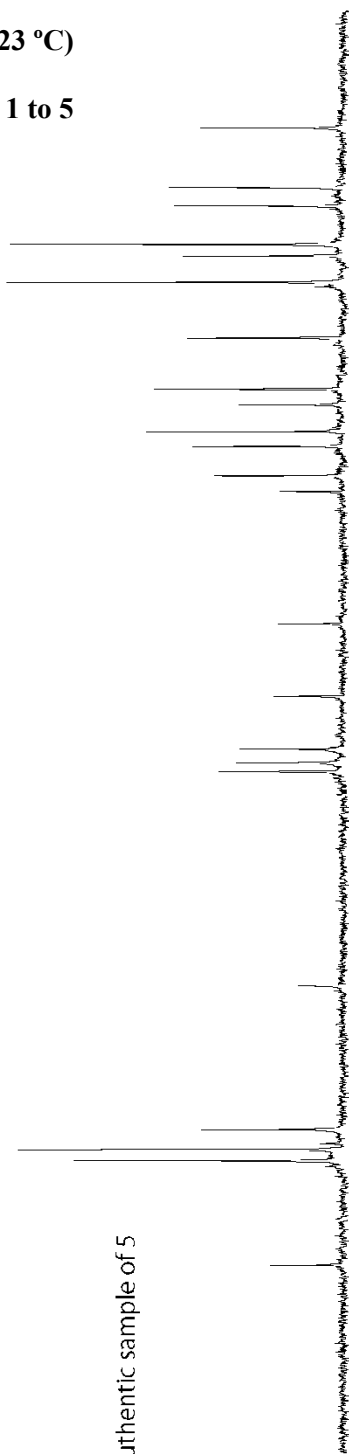

reaction mixture

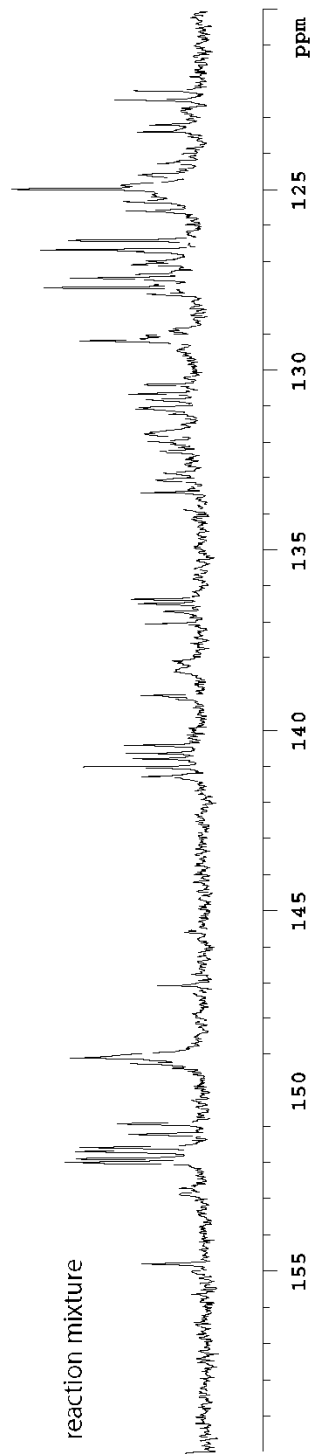

$^1\text{H}$  NMR ( $\text{CDCl}_3$ , 23 °C) of S6

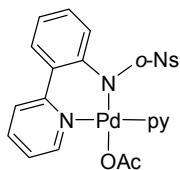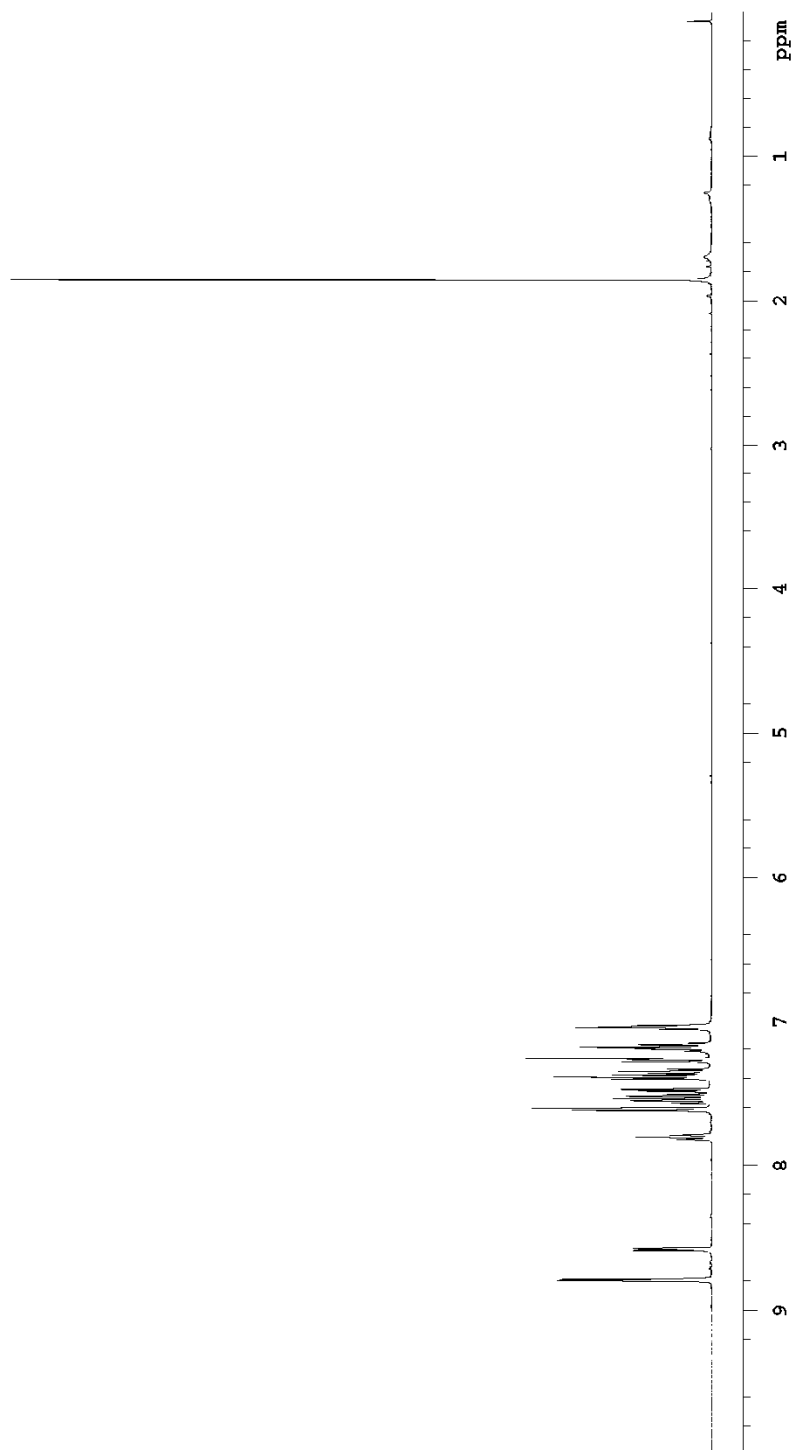

$^{13}\text{C}$  NMR ( $\text{CDCl}_3$ , 23 °C) of S6

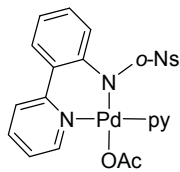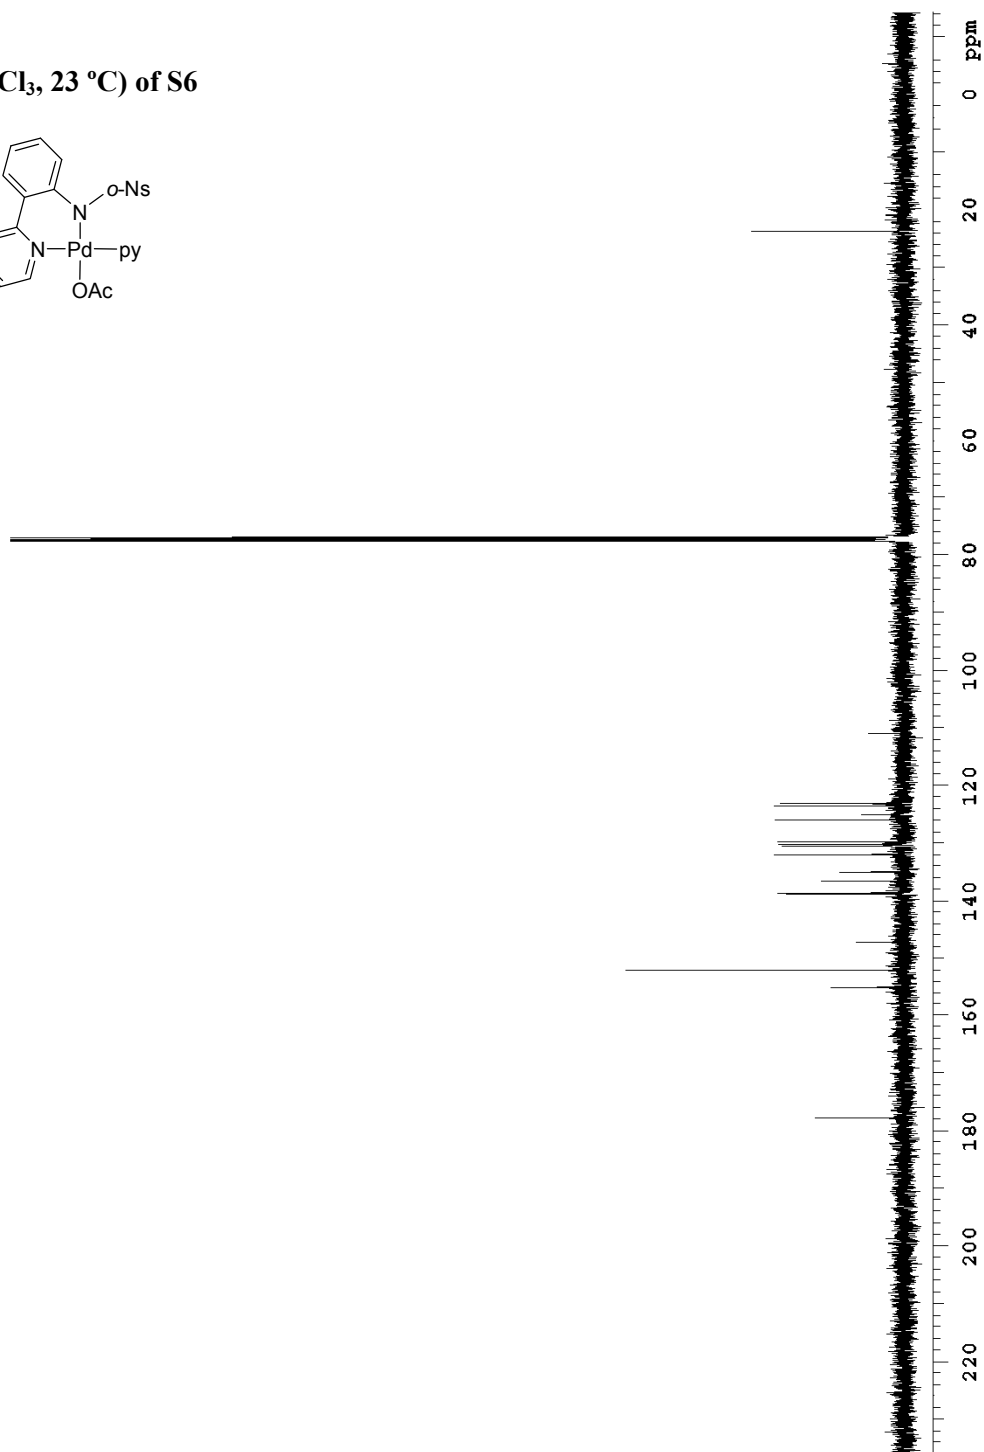

$^1\text{H}$  NMR (acetonitrile- $d_3$ , 23 °C) of **5**

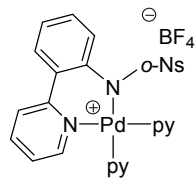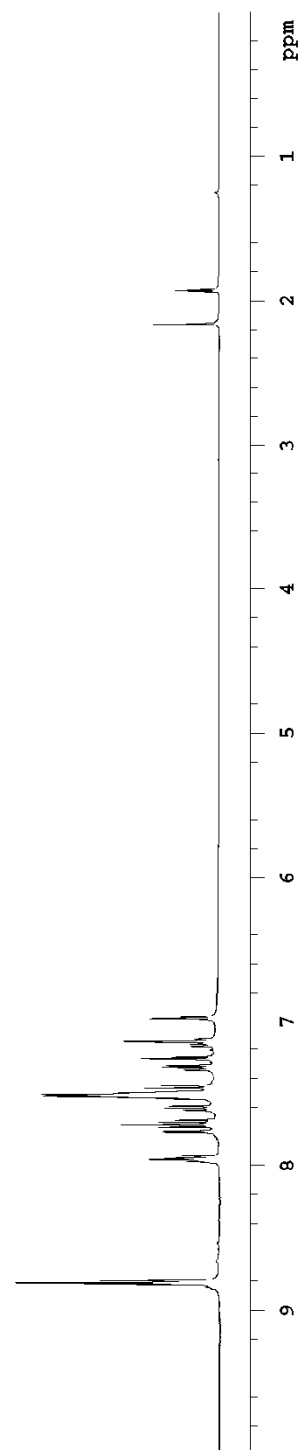

$^{13}\text{C}$  NMR (acetonitrile- $d_3$ , 23 °C) of **5**

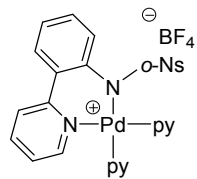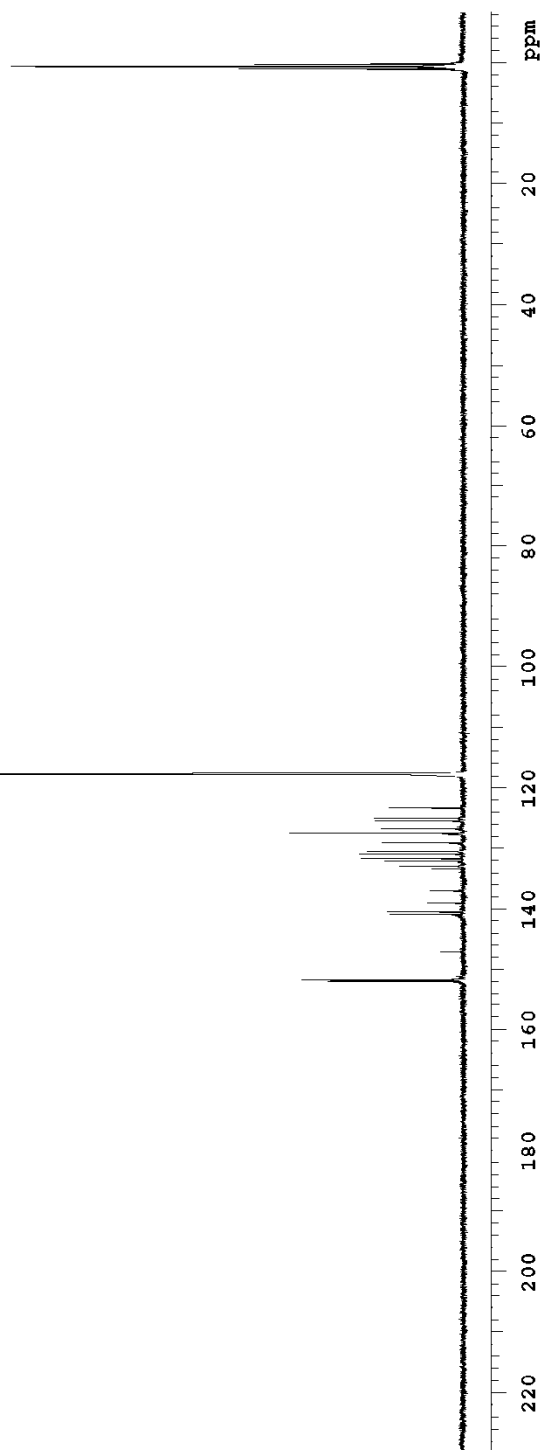



<sup>1</sup>H NMR (CDCl<sub>3</sub>, 23 °C) of S7

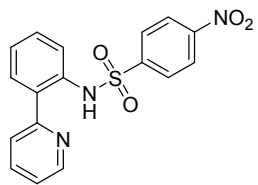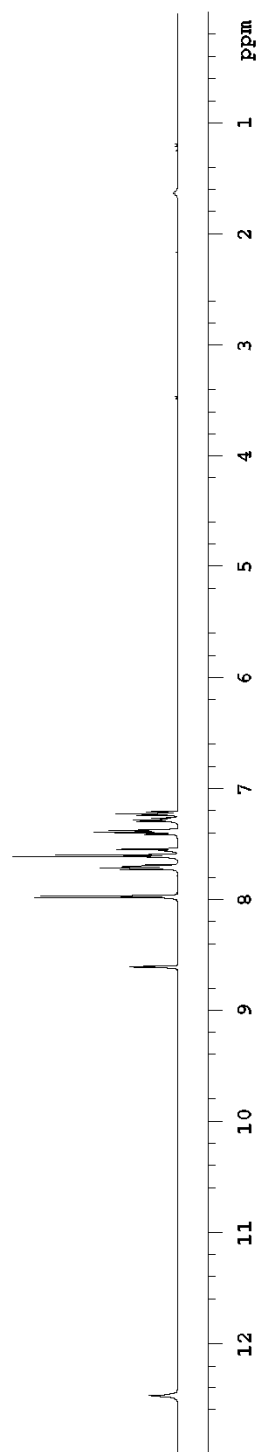

$^{13}\text{C}$  NMR ( $\text{CDCl}_3$ , 23 °C) of S7

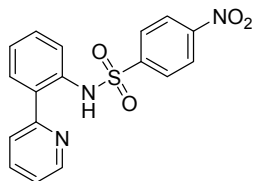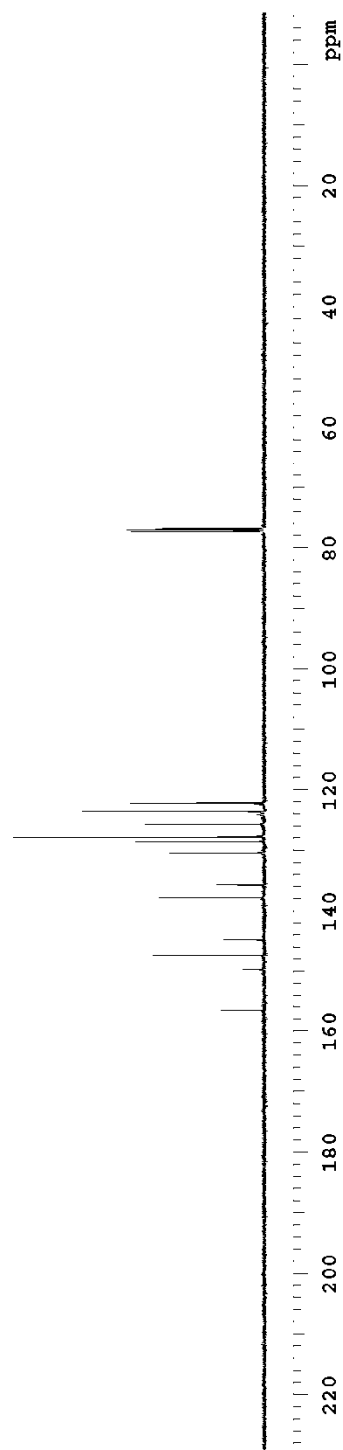

$^1\text{H}$  NMR ( $\text{CDCl}_3$ , 23 °C) of S8

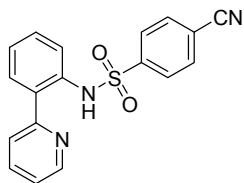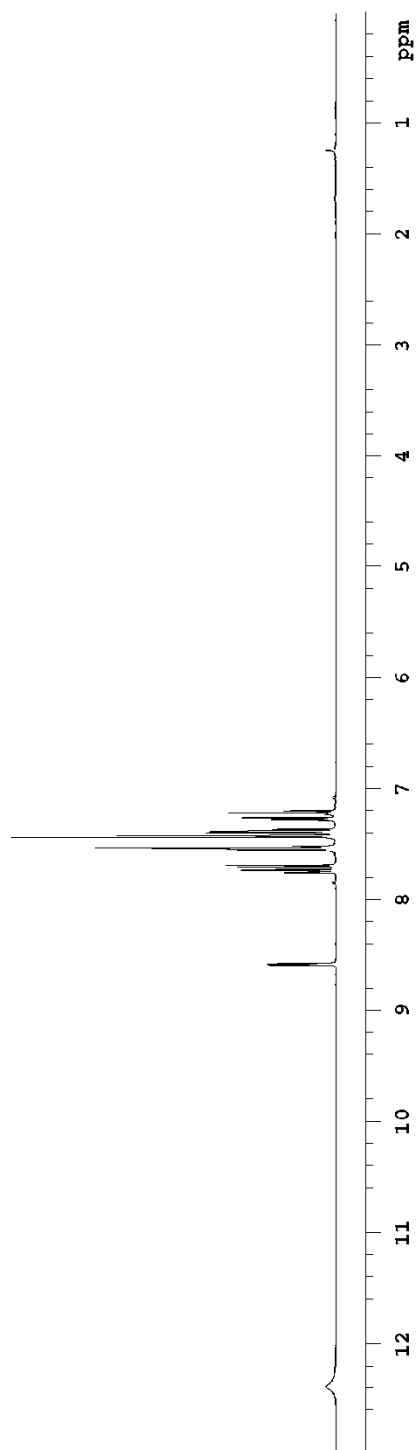

$^{13}\text{C}$  NMR ( $\text{CDCl}_3$ , 23 °C) of S8

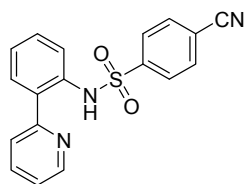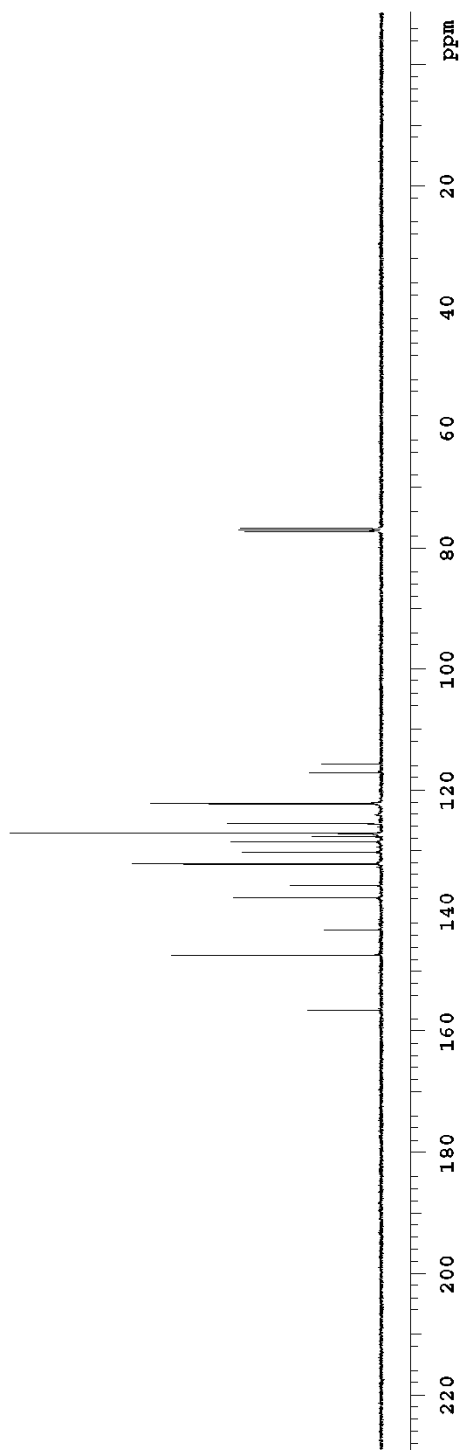

$^1\text{H}$  NMR ( $\text{CDCl}_3$ , 23 °C) of S9

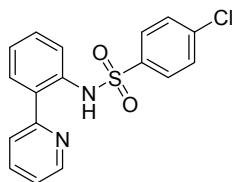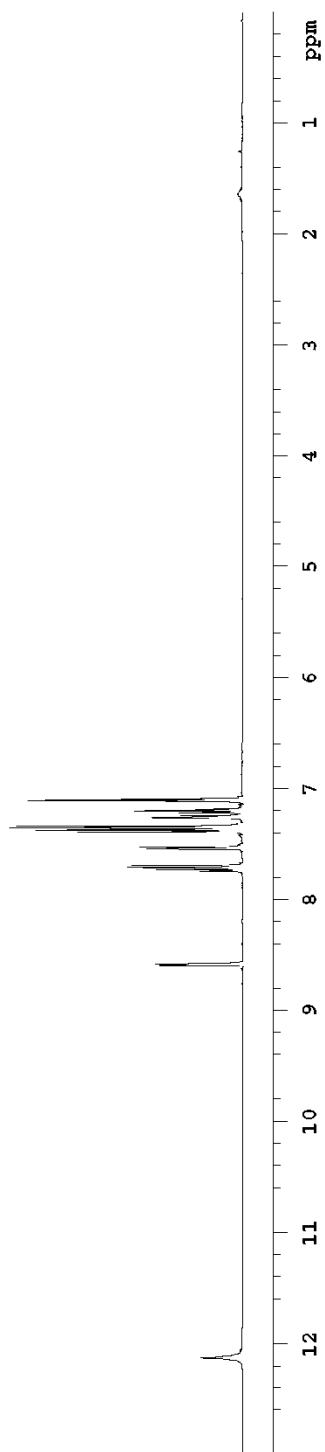

$^{13}\text{C}$  NMR ( $\text{CDCl}_3$ , 23 °C) of S9

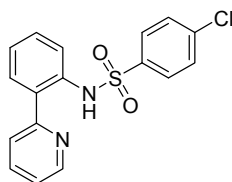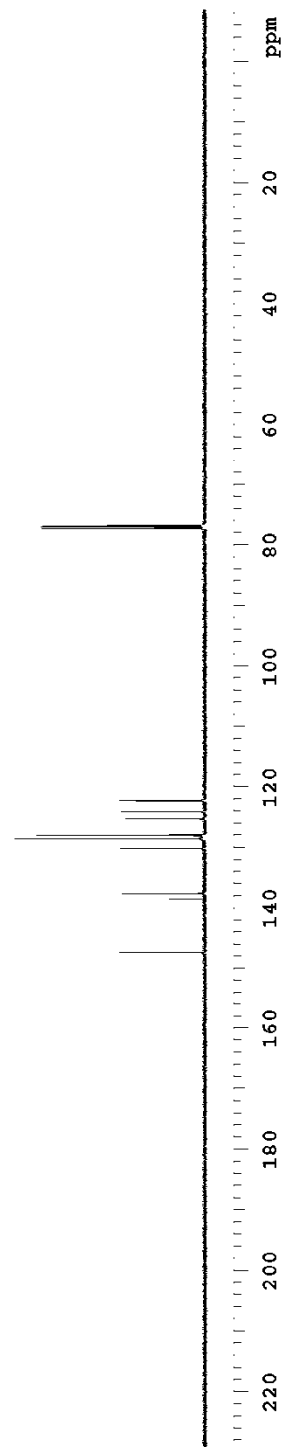

$^1\text{H}$  NMR ( $\text{CDCl}_3$ , 23 °C) of S10

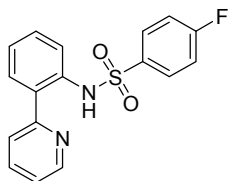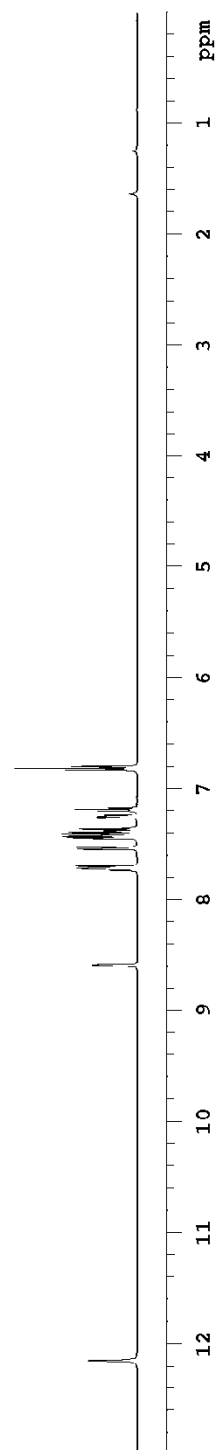

$^{13}\text{C}$ NMR ( $\text{CDCl}_3$ , 23 °C) of S10

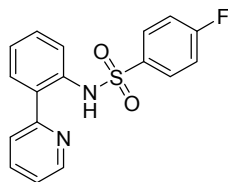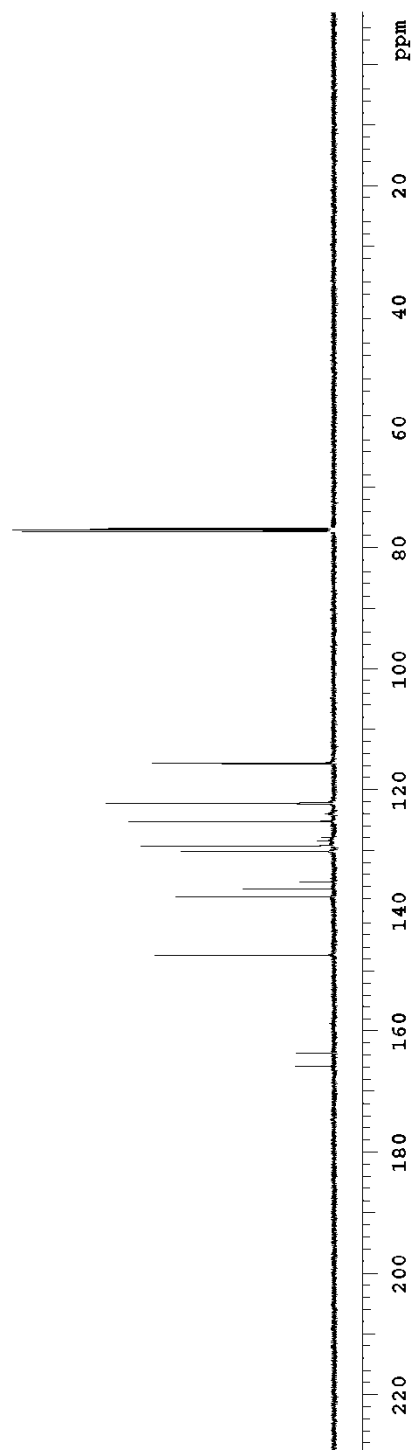



$^1\text{H}$  NMR ( $\text{CDCl}_3$ , 23 °C) of S11

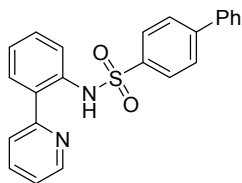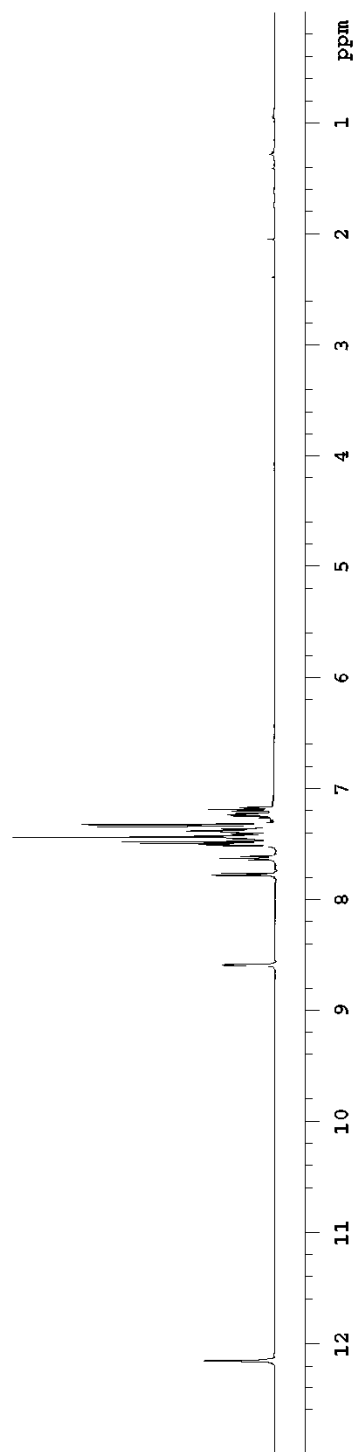

$^{13}\text{C}$  NMR ( $\text{CDCl}_3$ , 23 °C) of S11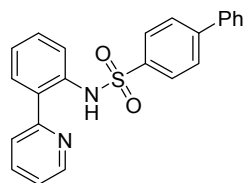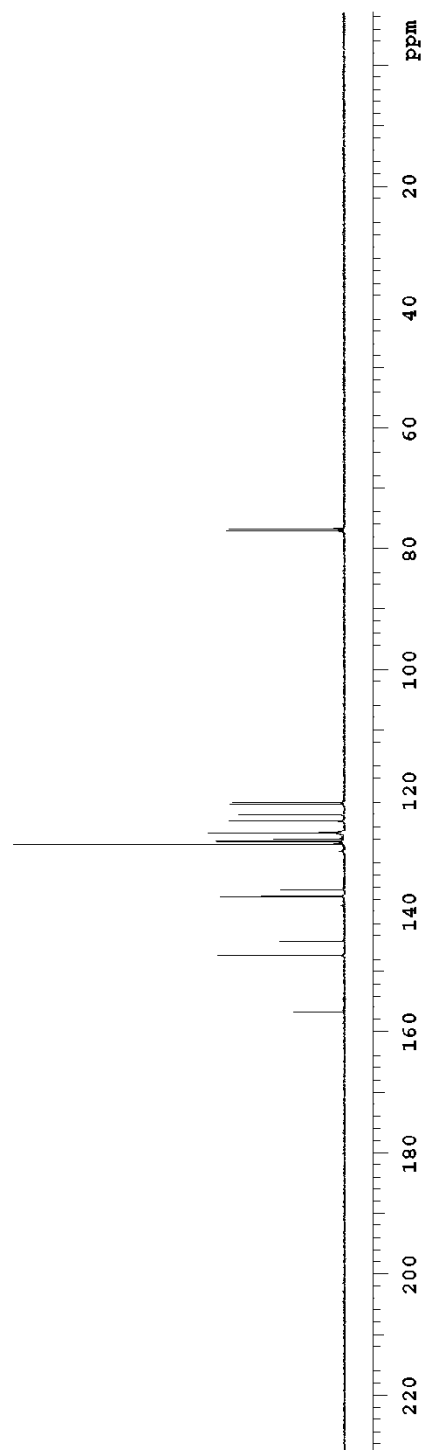

**$^1\text{H}$  NMR ( $\text{CDCl}_3$ , 23  $^\circ\text{C}$ ) of S12**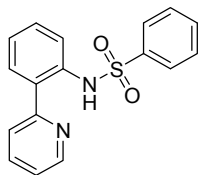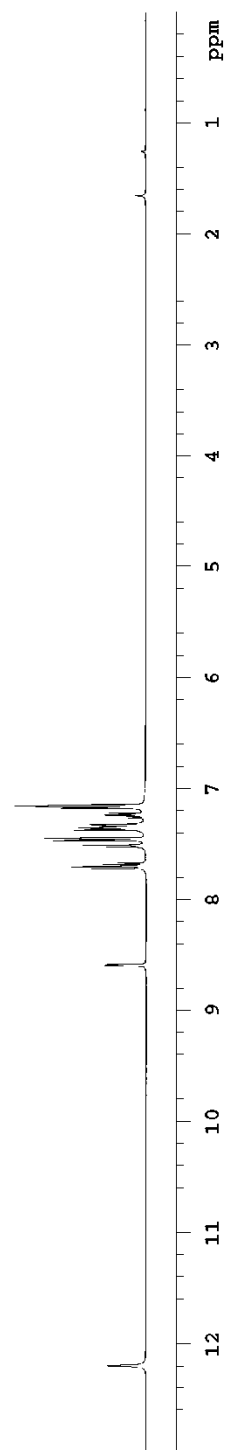

$^{13}\text{C}$  NMR ( $\text{CDCl}_3$ , 23 °C) of S12

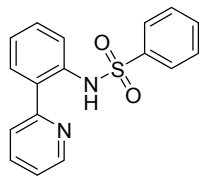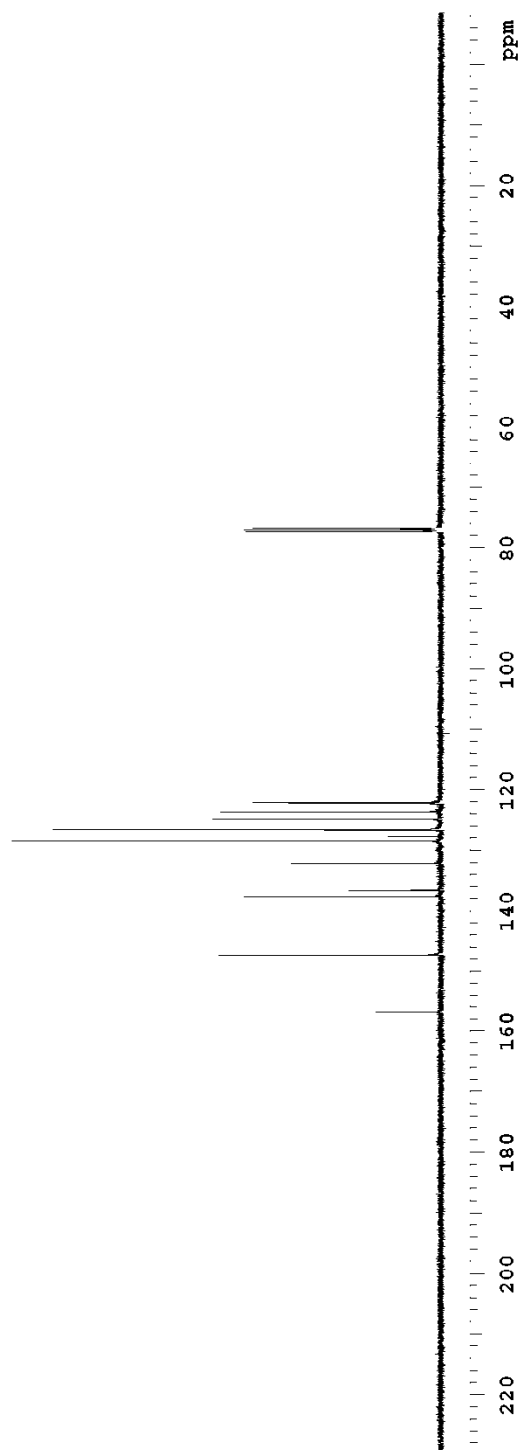

$^1\text{H}$  NMR ( $\text{CDCl}_3$ , 23 °C) of S13

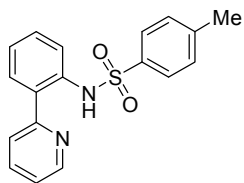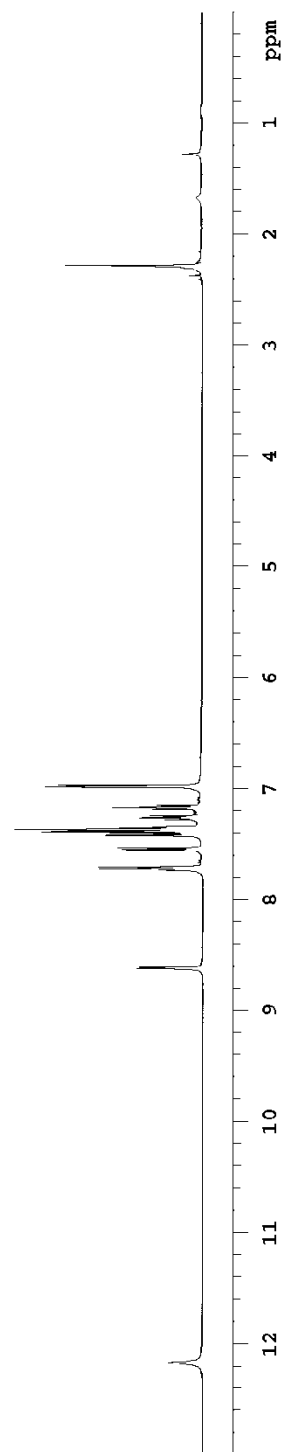

$^{13}\text{C}$  NMR ( $\text{CDCl}_3$ , 23 °C) of S13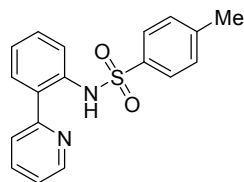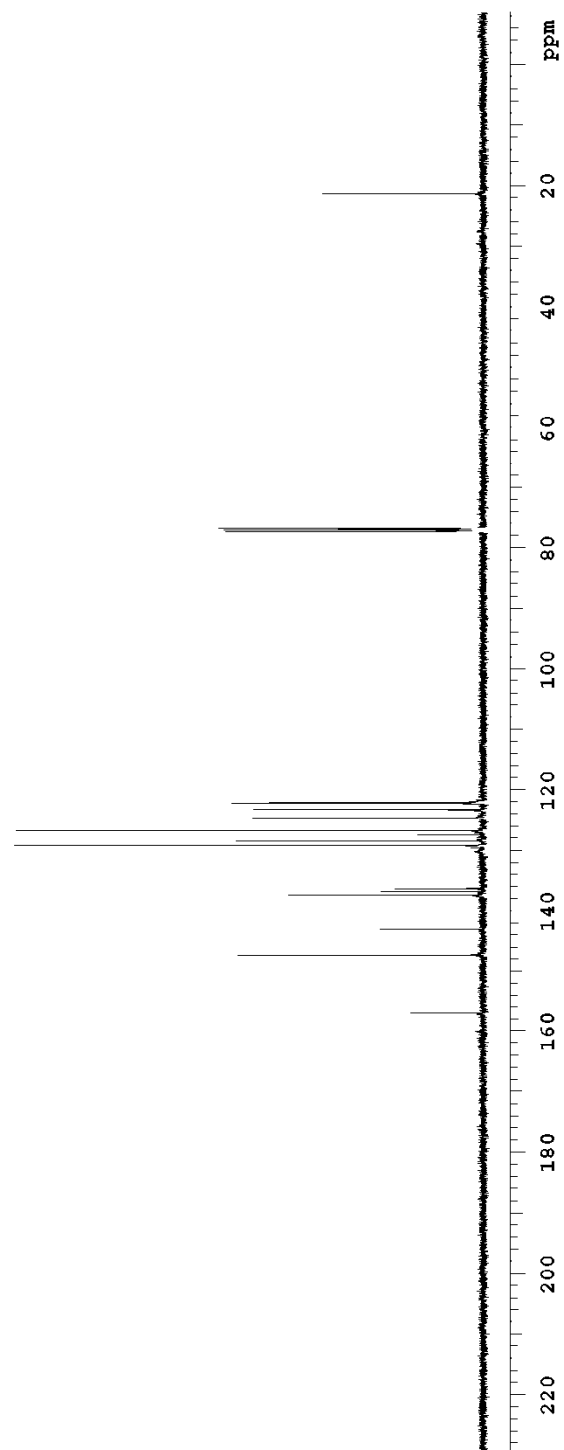

$^1\text{H}$  NMR ( $\text{CDCl}_3$ , 23 °C) of S14

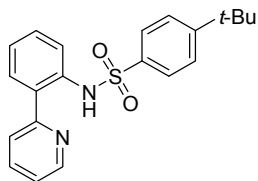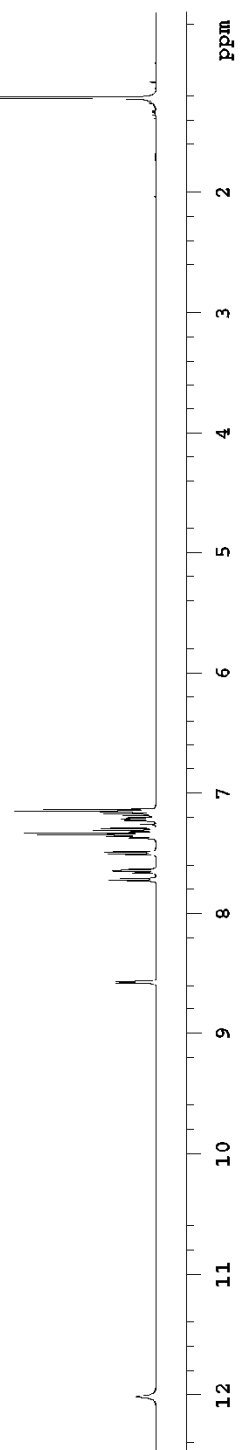

$^{13}\text{C}$  NMR ( $\text{CDCl}_3$ , 23 °C) of S14

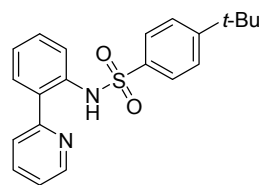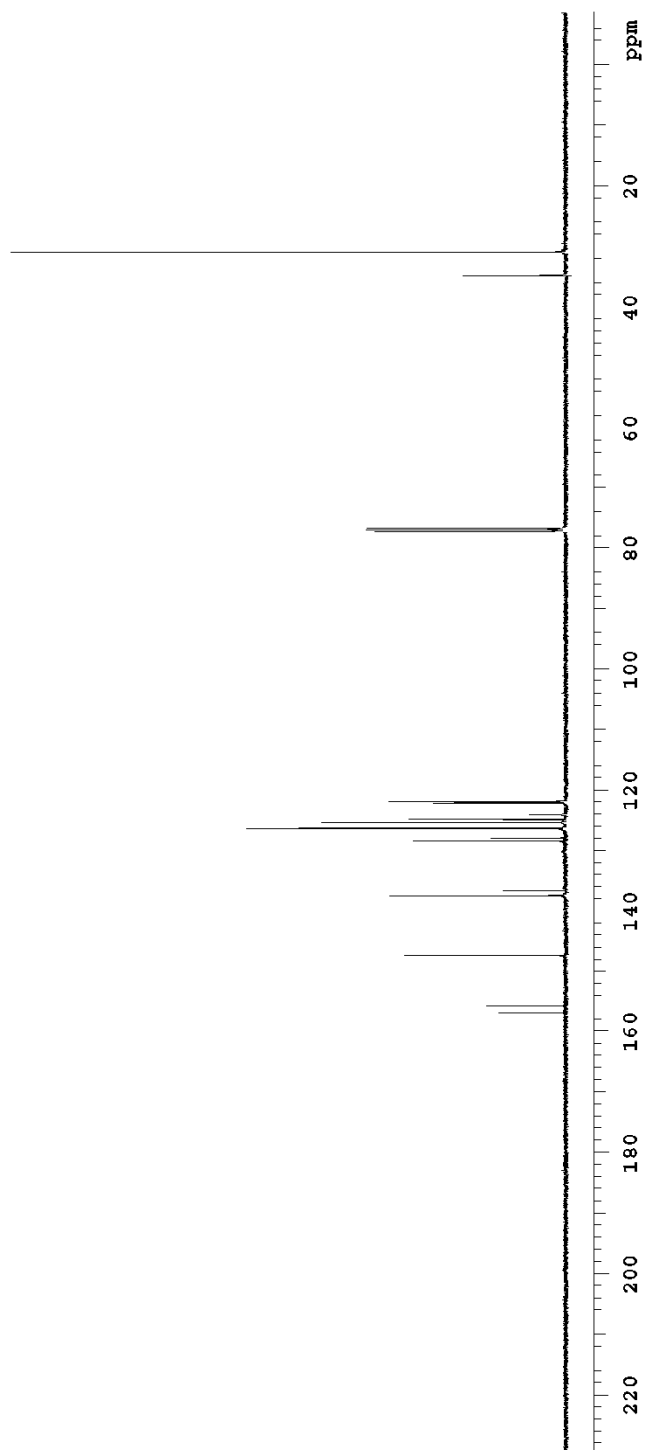



$^1\text{H}$  NMR ( $\text{CDCl}_3$ , 23 °C) of S15

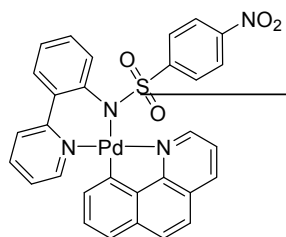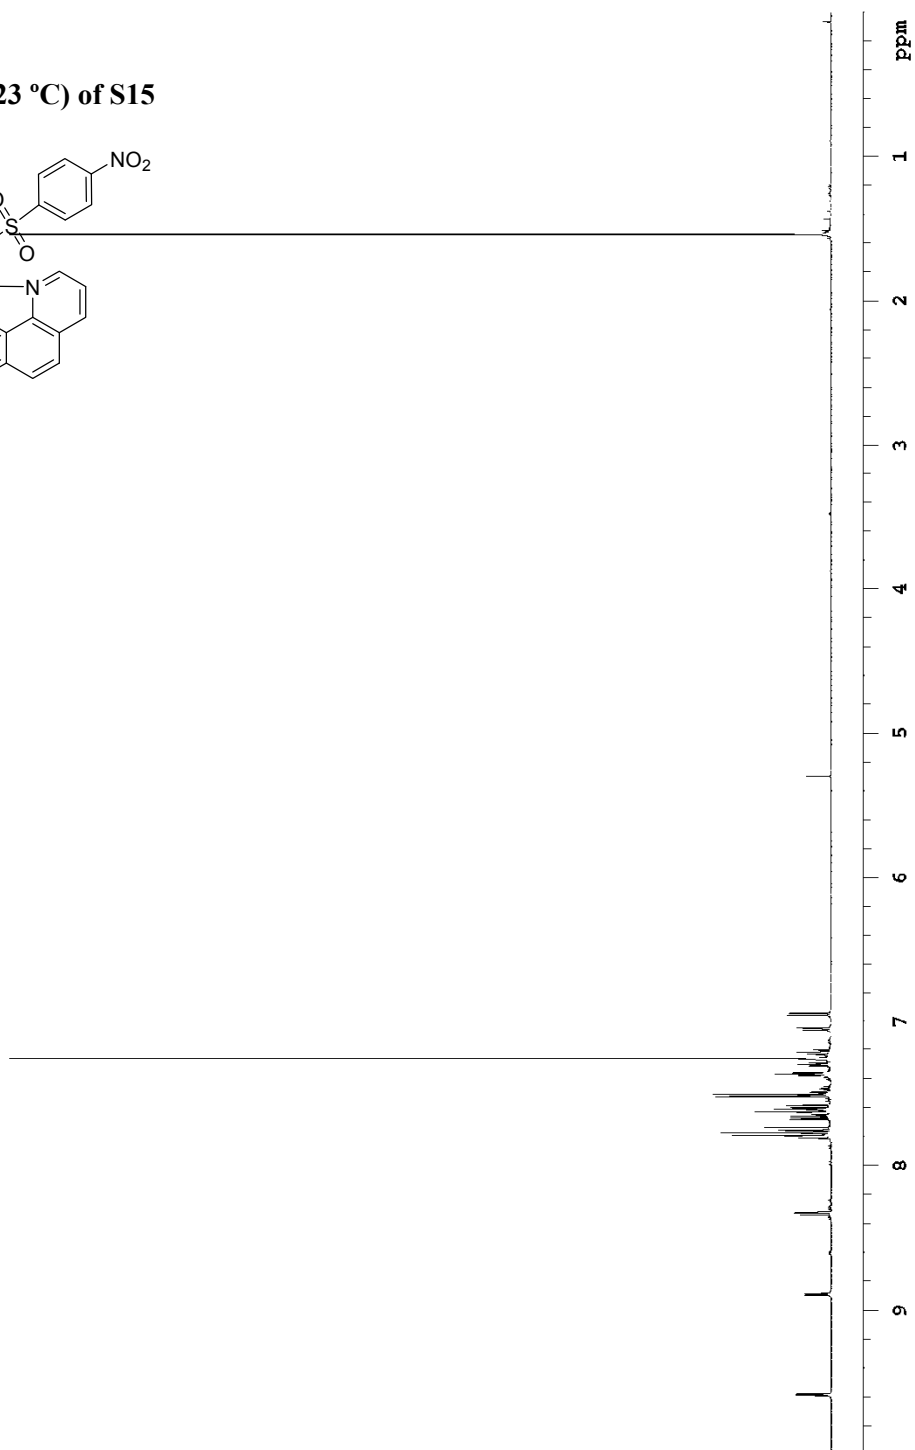

$^{13}\text{C}$  NMR ( $\text{CDCl}_3$ , 23 °C) of S15

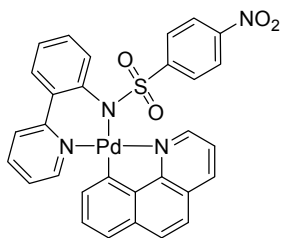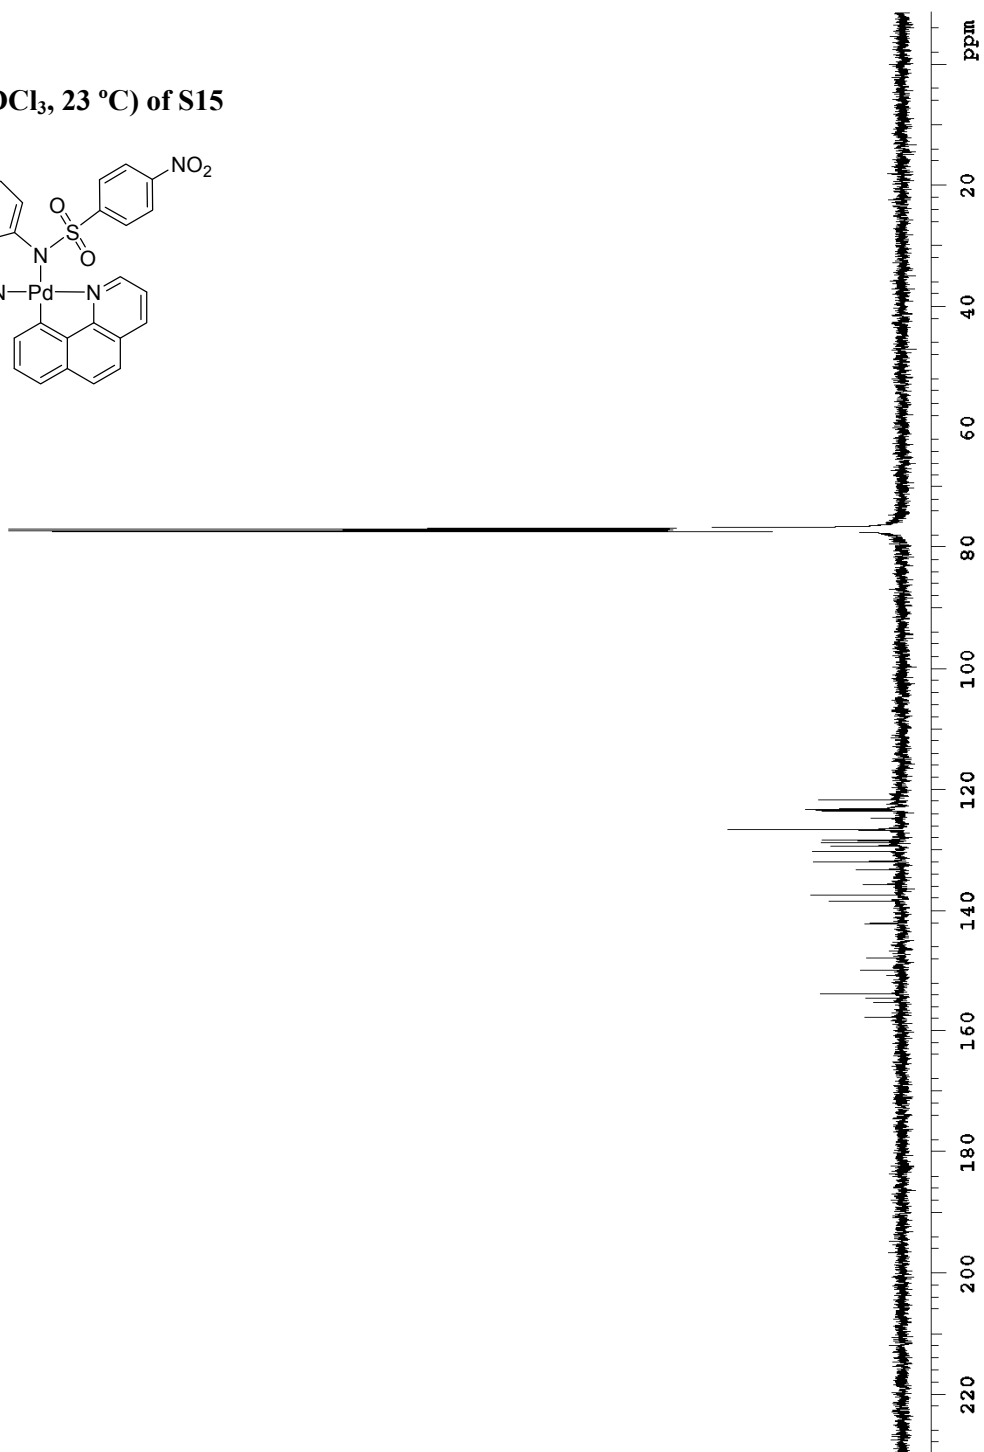

**$^1\text{H}$  NMR ( $\text{CDCl}_3$ , 23  $^\circ\text{C}$ ) of S16**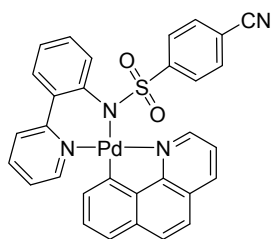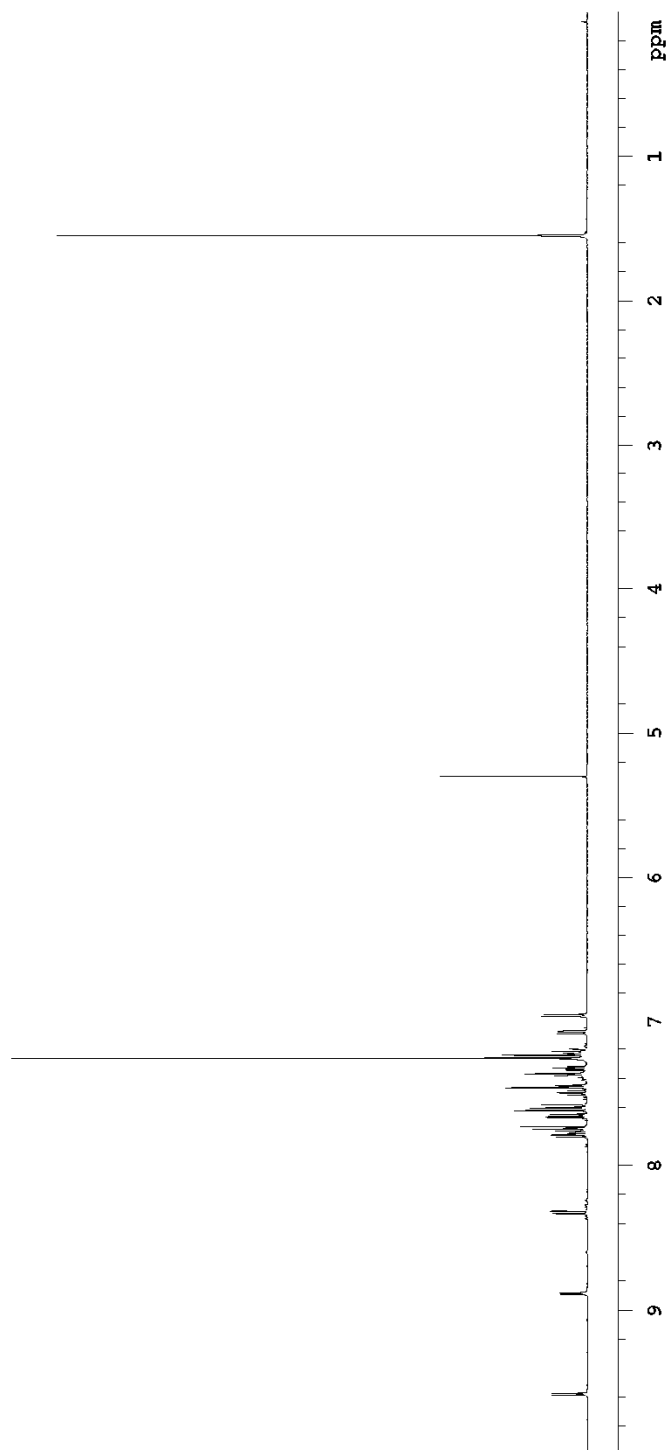

$^{13}\text{C}$  NMR ( $\text{CDCl}_3$ , 23 °C) of S16

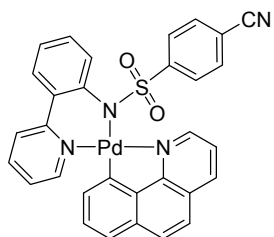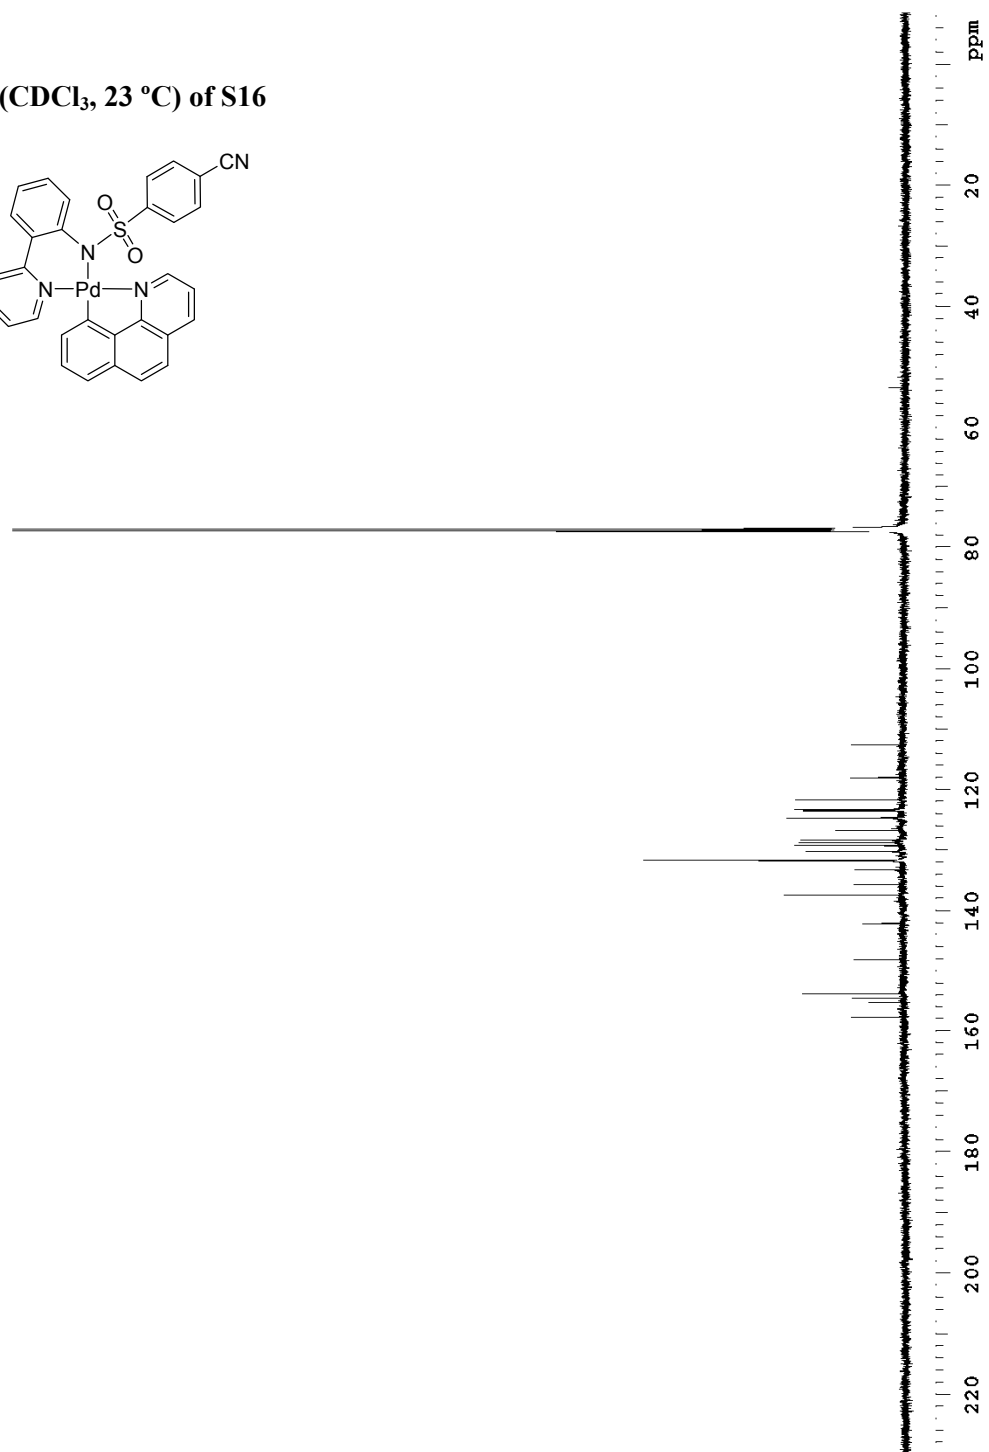

$^1\text{H}$  NMR ( $\text{CDCl}_3$ , 23 °C) of S17

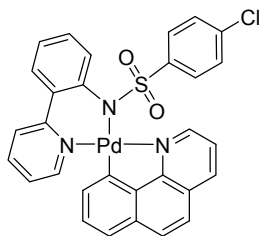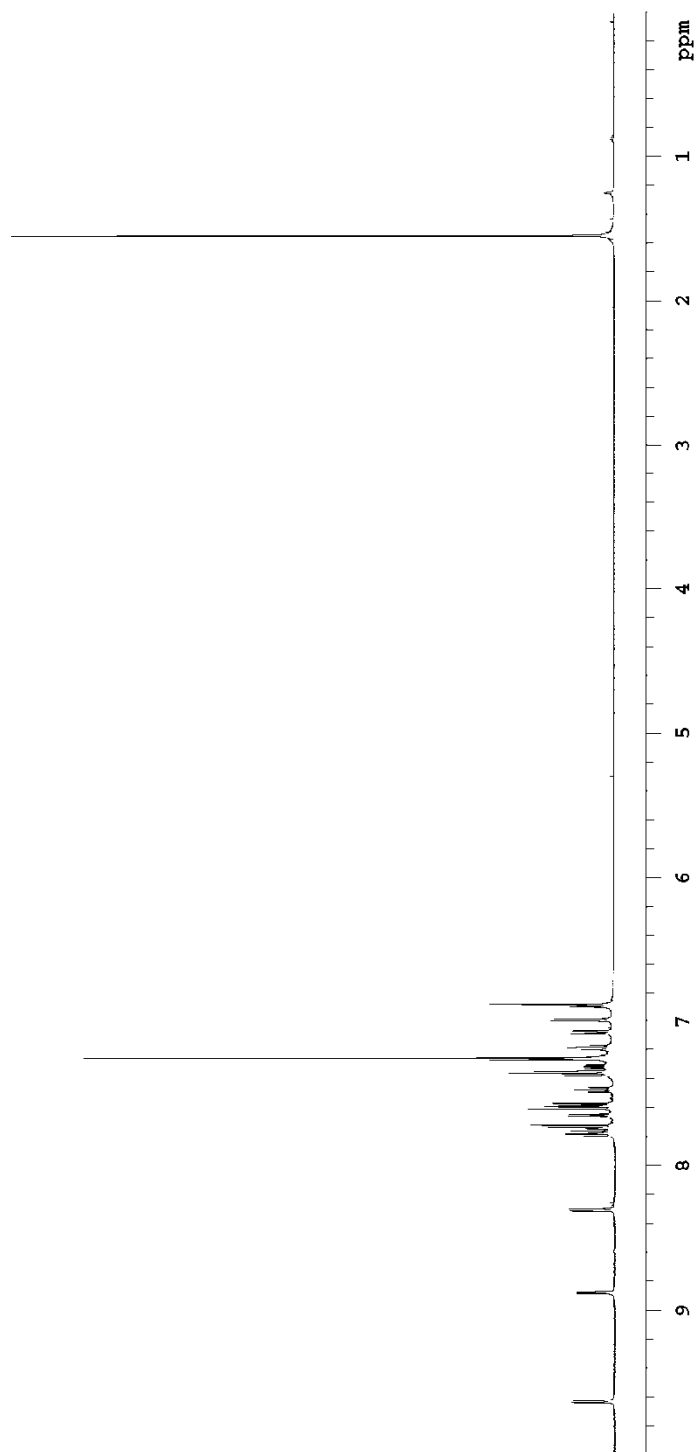

$^{13}\text{C}$  NMR ( $\text{CDCl}_3$ , 23 °C) of S17

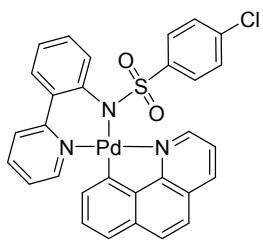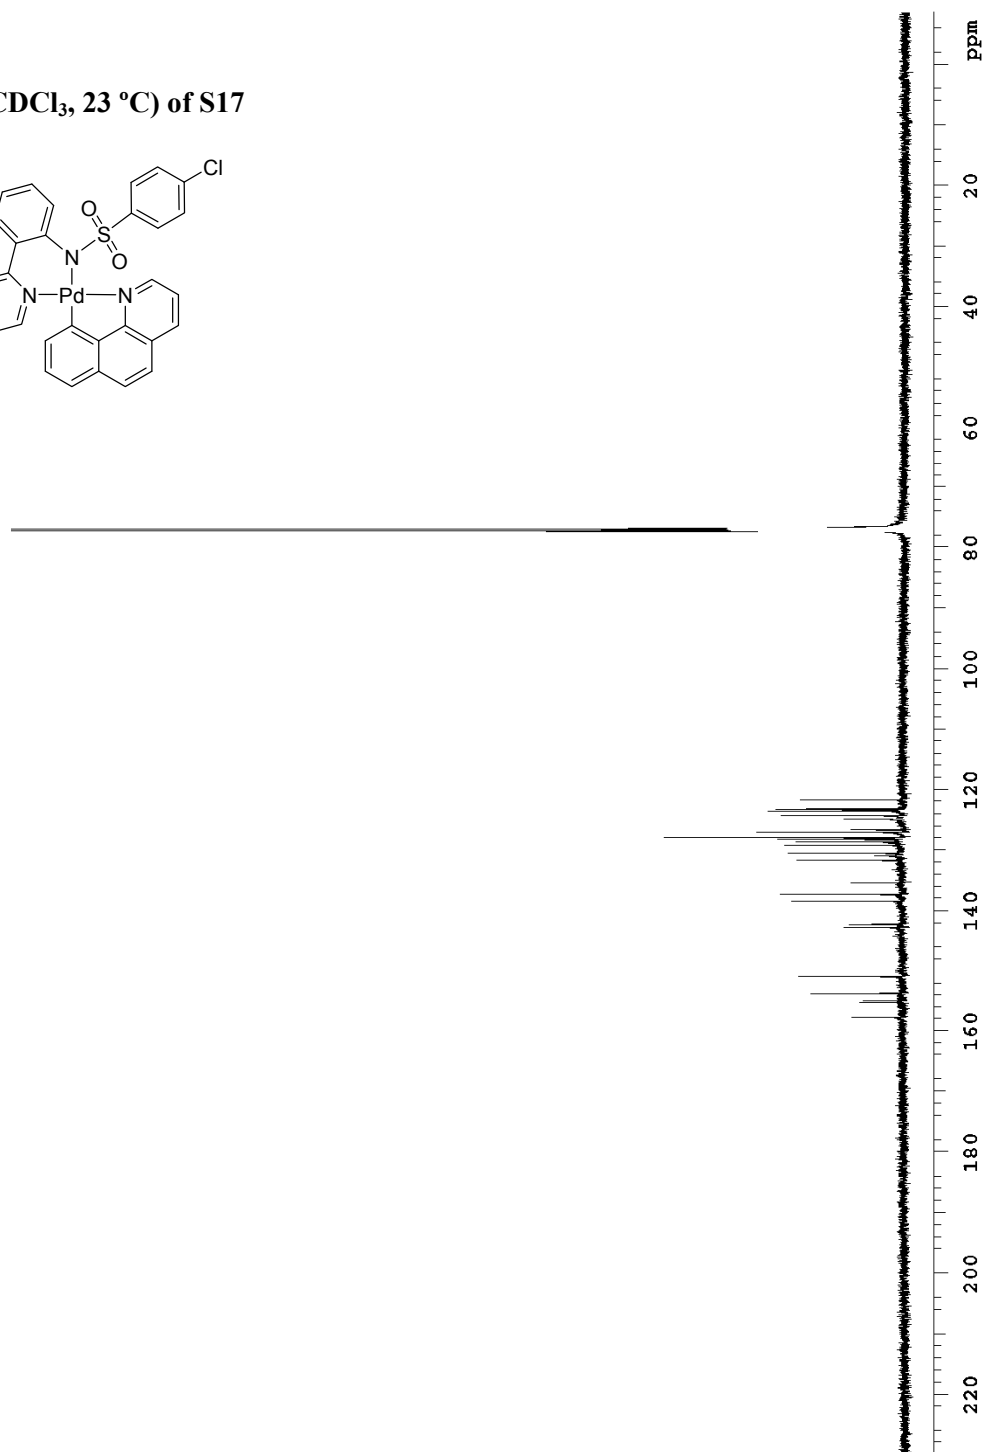

$^1\text{H}$  NMR ( $\text{CDCl}_3$ , 23 °C) of S18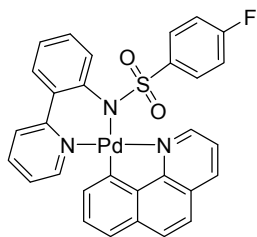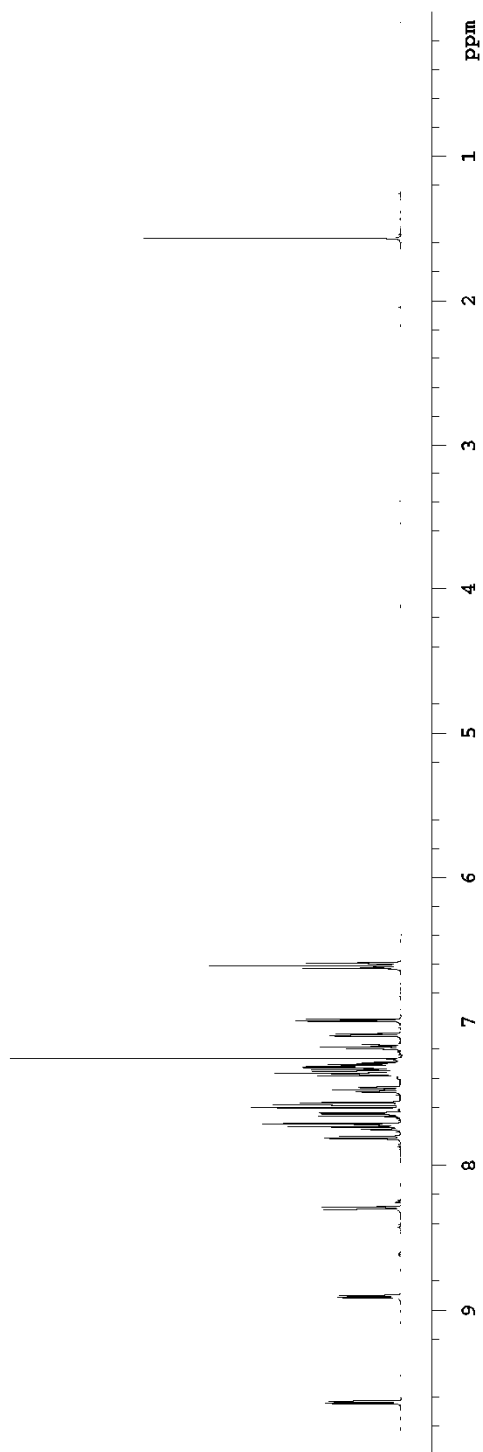

$^{13}\text{C}$  NMR ( $\text{CDCl}_3$ , 23 °C) of S18

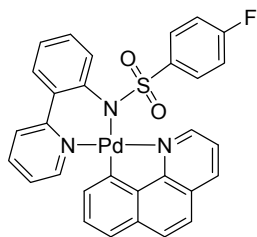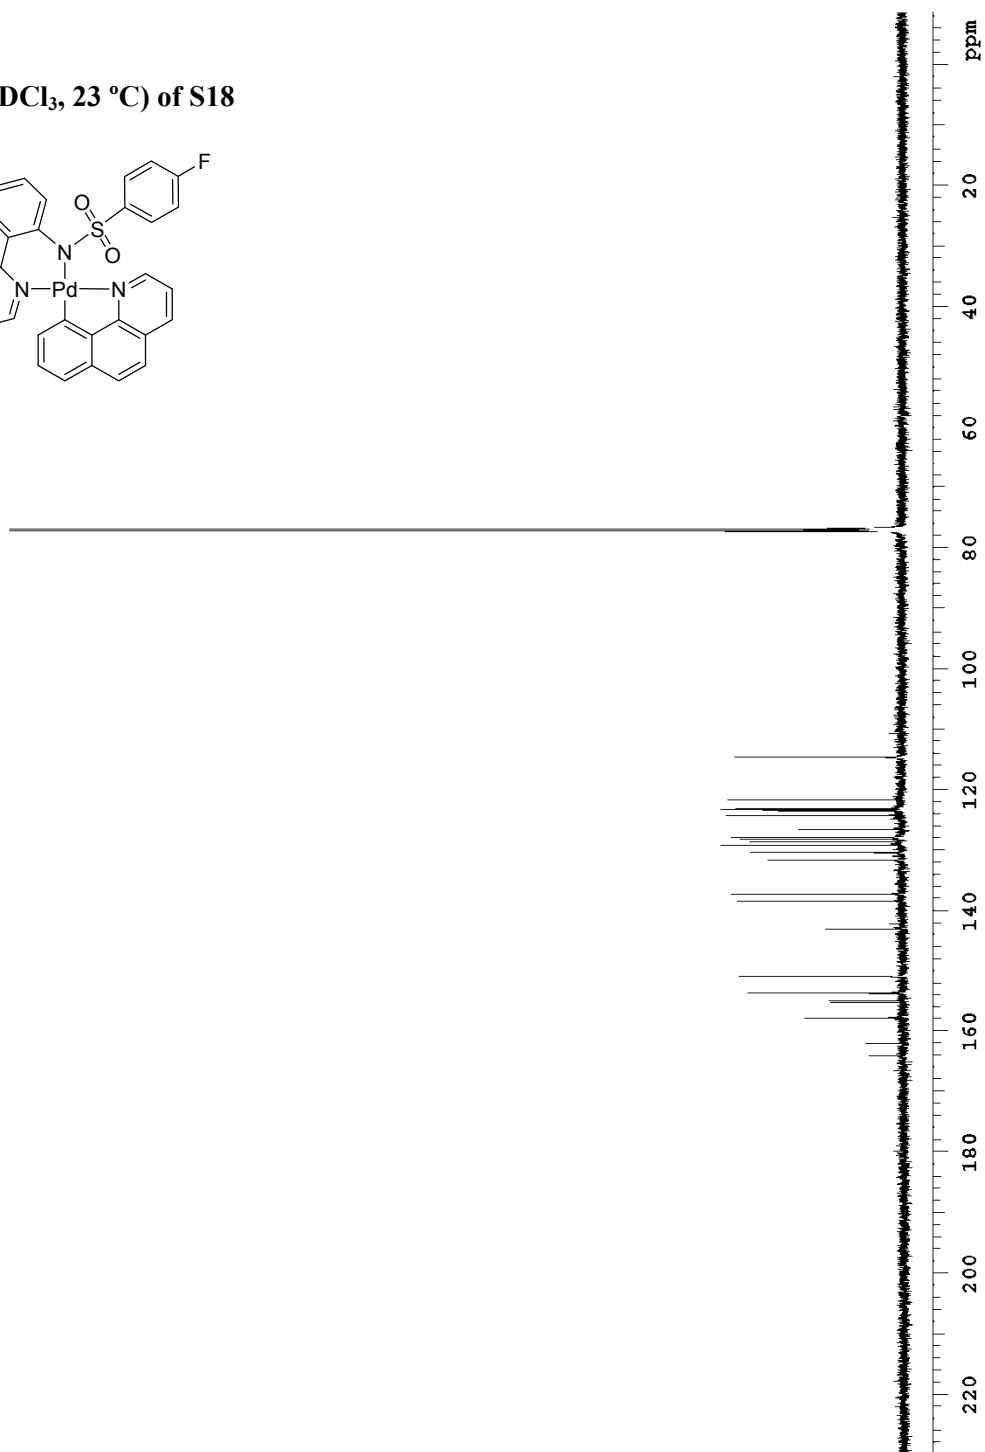



$^1\text{H}$  NMR ( $\text{CDCl}_3$ , 23 °C) of S19

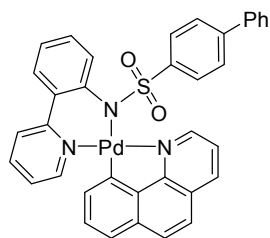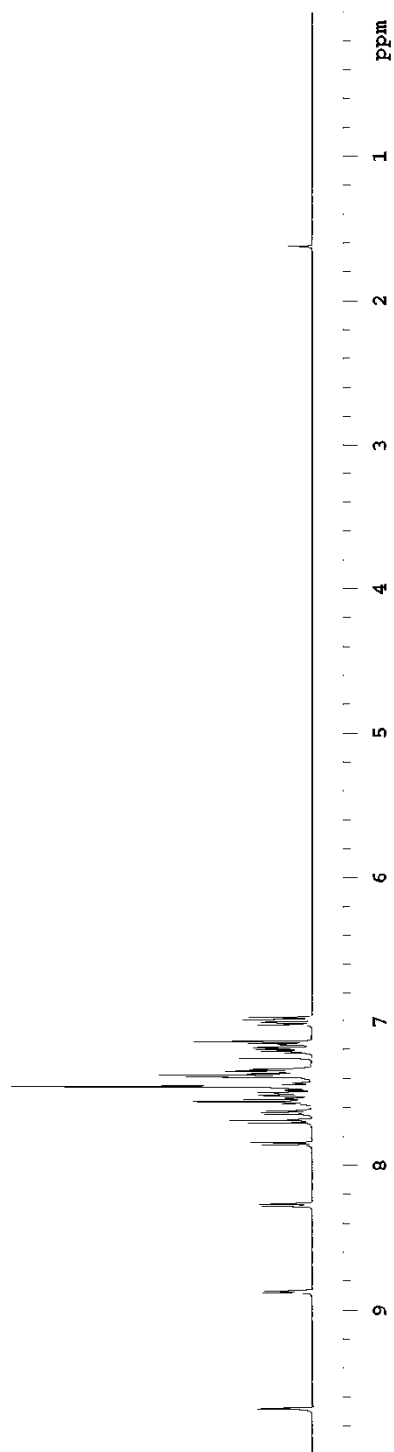

$^{13}\text{C}$  NMR ( $\text{CDCl}_3$ , 23 °C) of S19

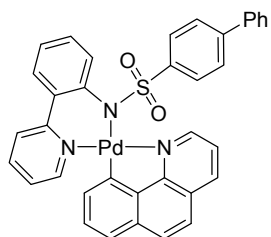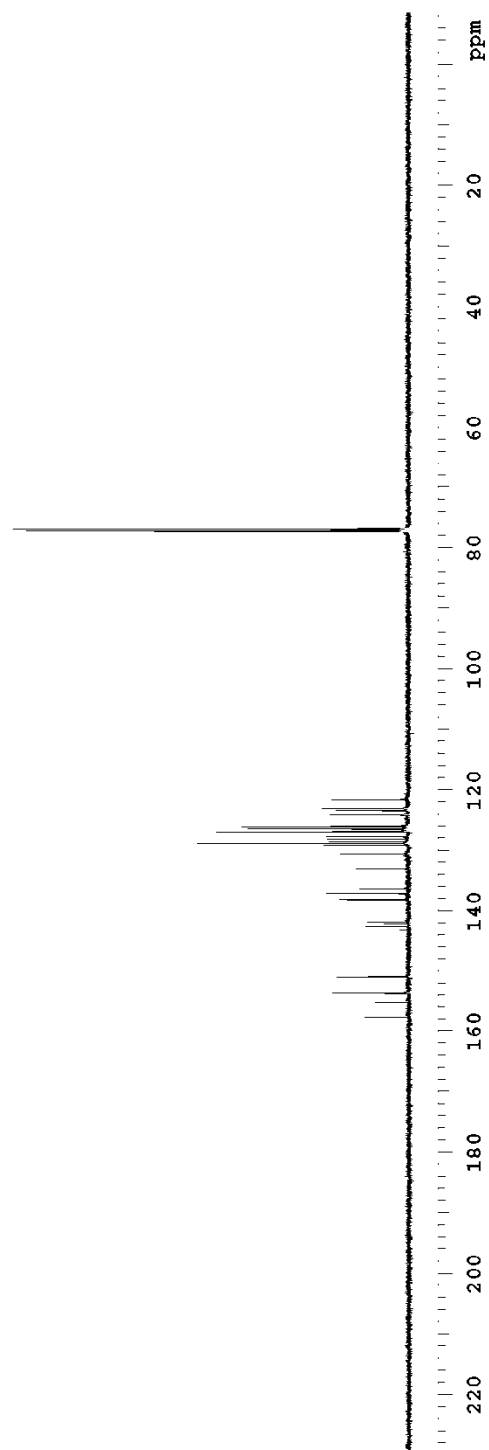

$^1\text{H}$  NMR ( $\text{CDCl}_3$ , 23 °C) of S20

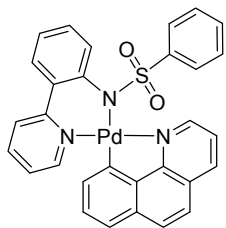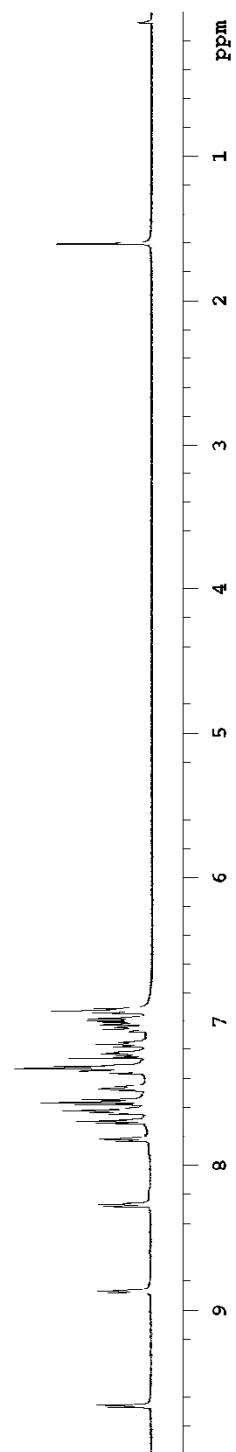

$^{13}\text{C}$  NMR ( $\text{CDCl}_3$ , 23 °C) of S20

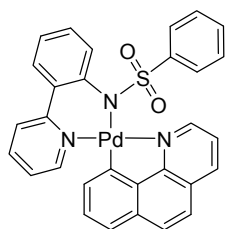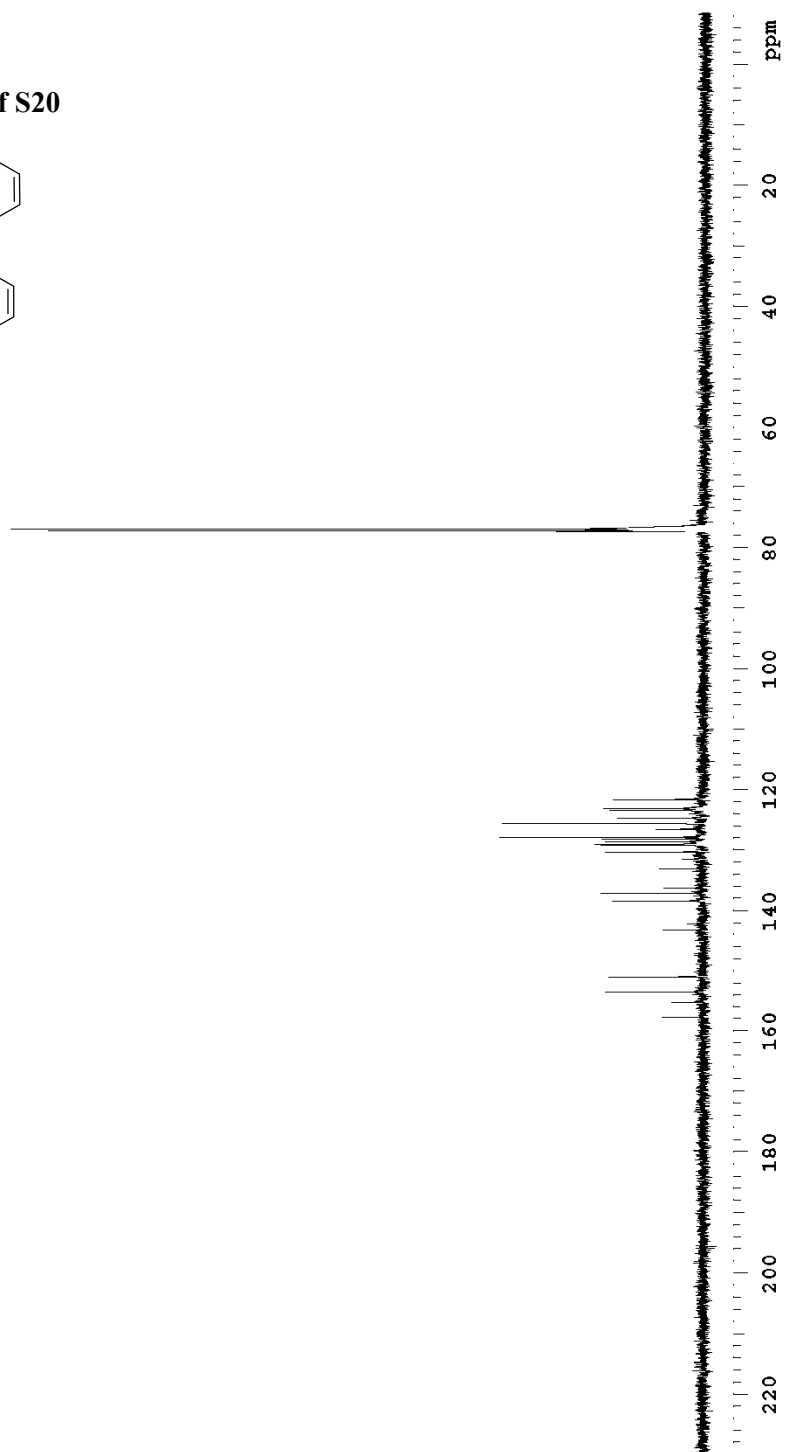

$^1\text{H}$  NMR ( $\text{CDCl}_3$ , 23 °C) of S21

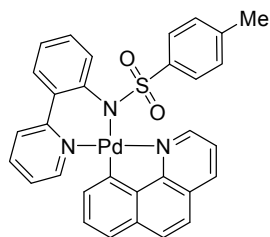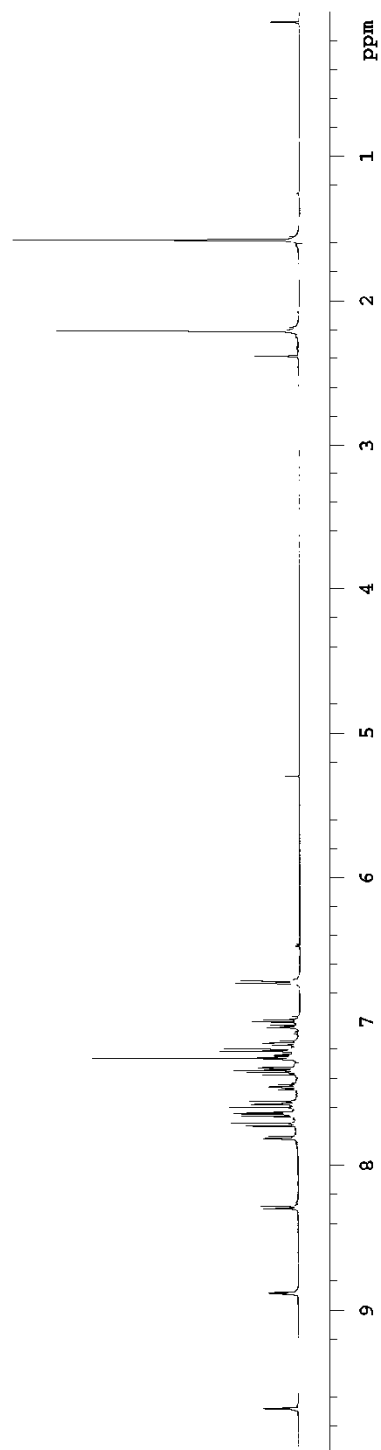

$^{13}\text{C}$  NMR ( $\text{CDCl}_3$ , 23 °C) of S21

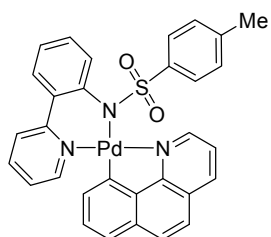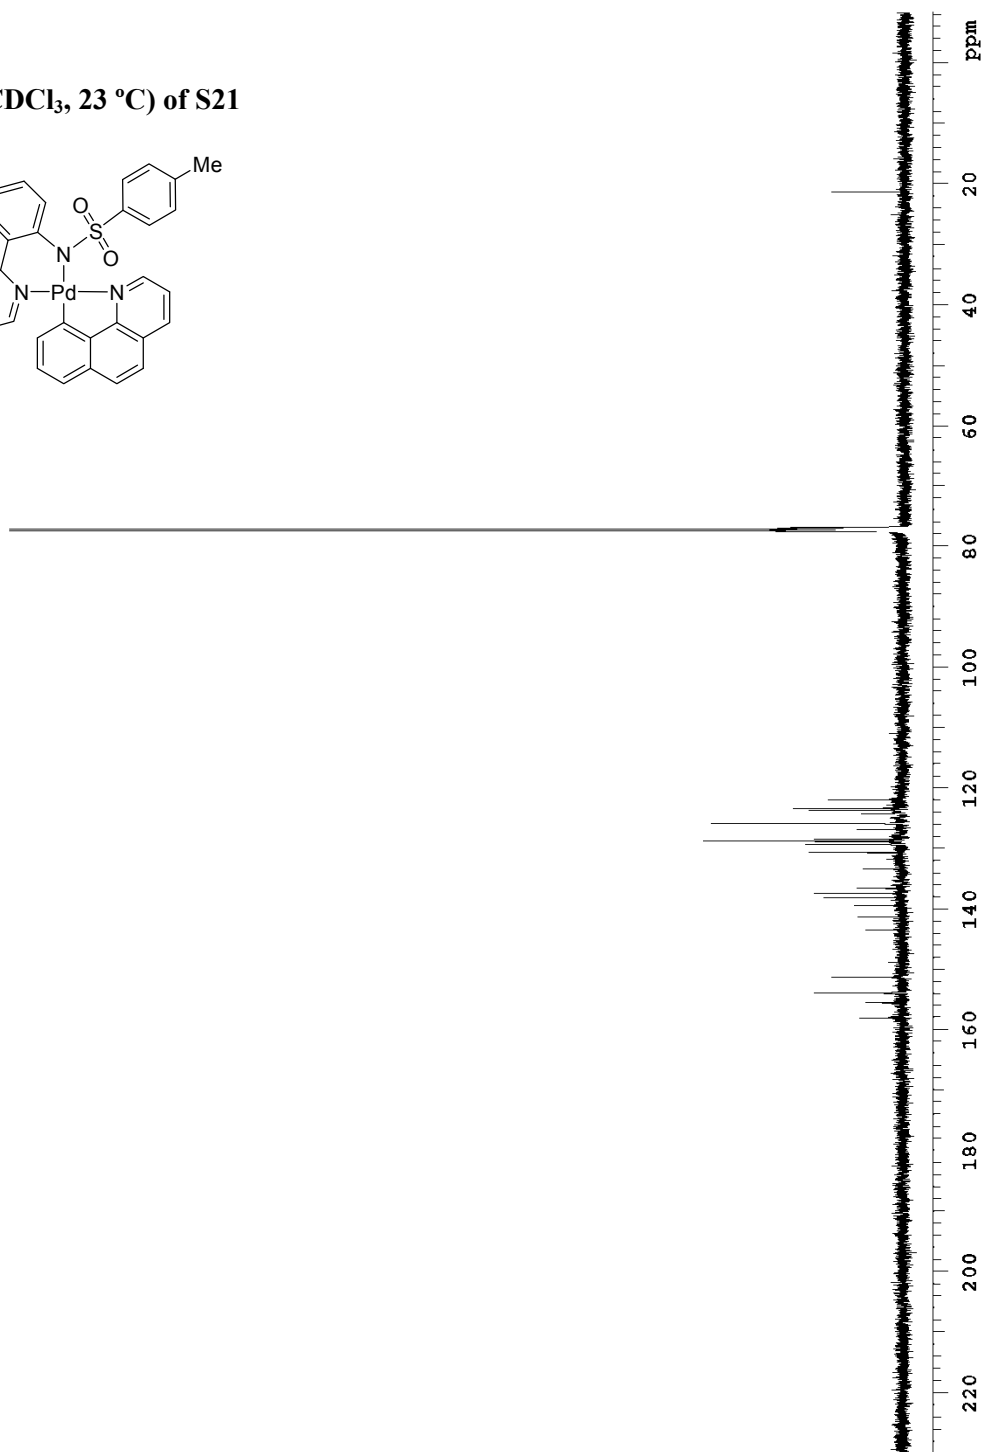

$^1\text{H}$  NMR ( $\text{CDCl}_3$ , 23 °C) of S22

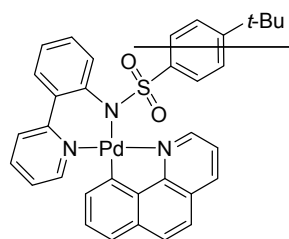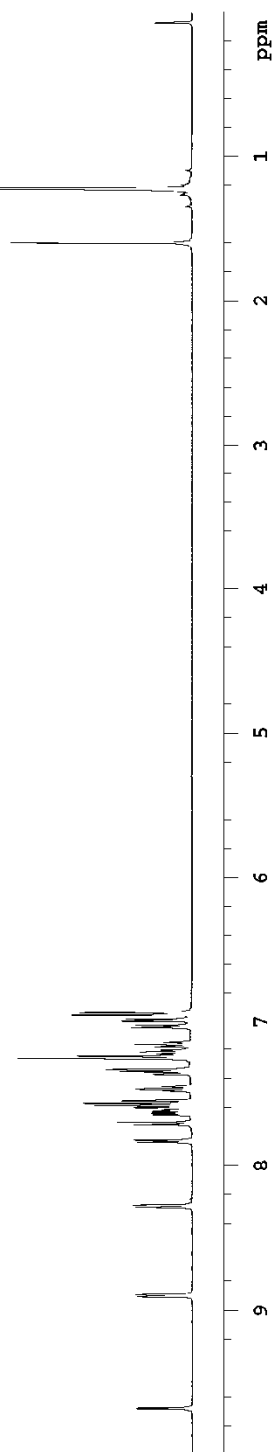

$^{13}\text{C}$  NMR ( $\text{CDCl}_3$ , 23 °C) of S22

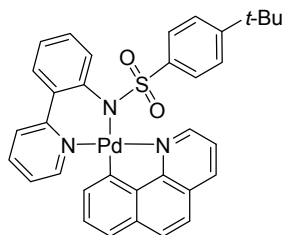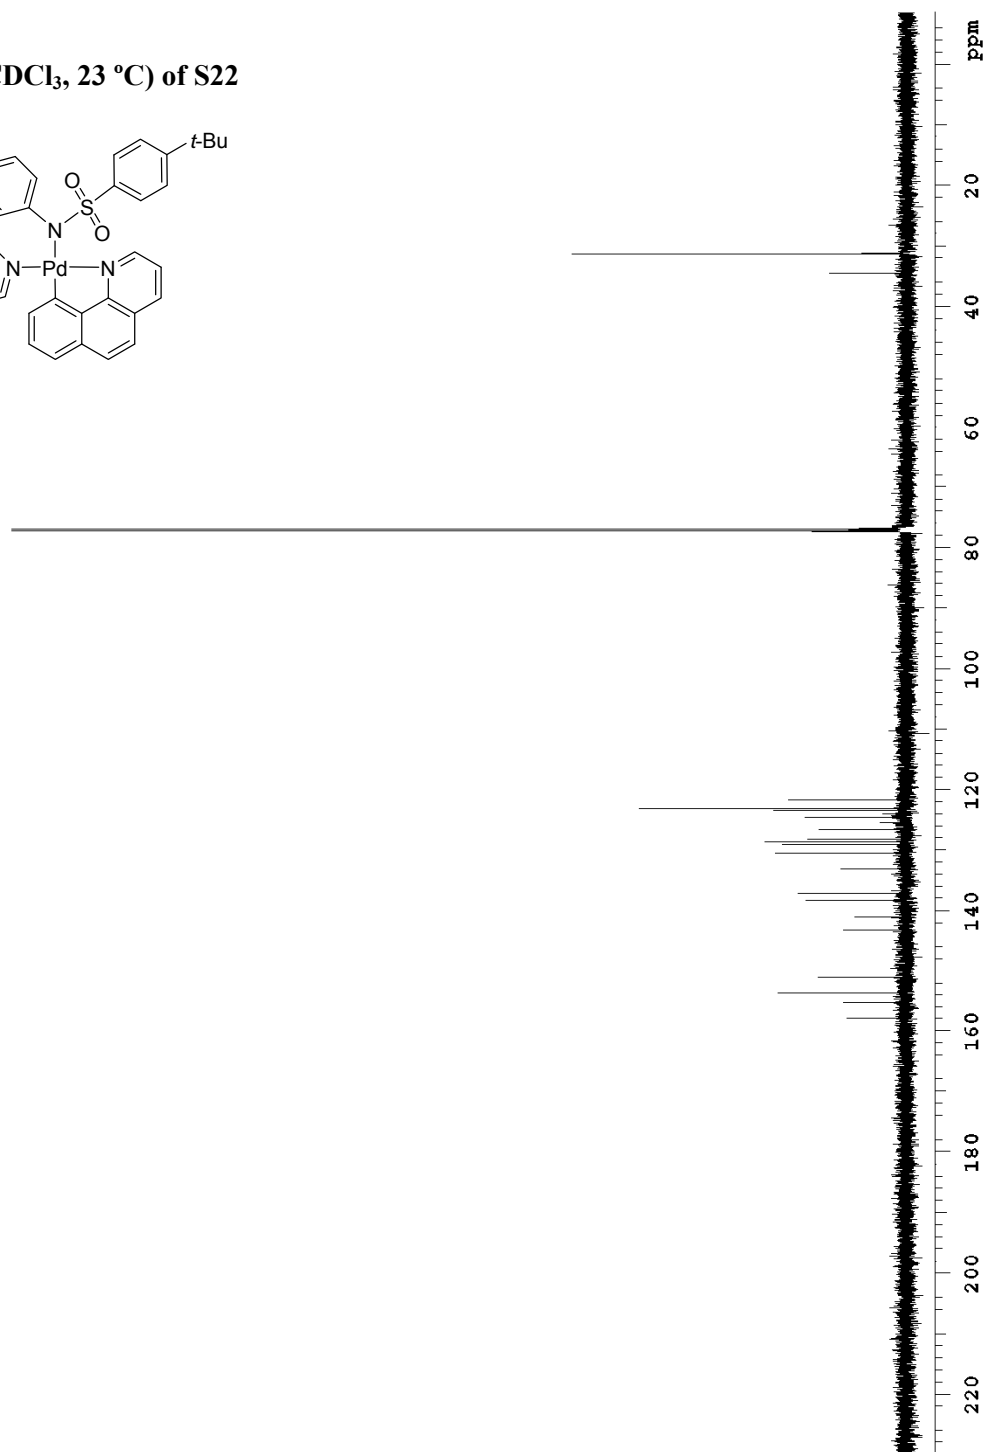



$^1\text{H}$  NMR (acetonitrile- $d_3$ , 23 °C) of 6a

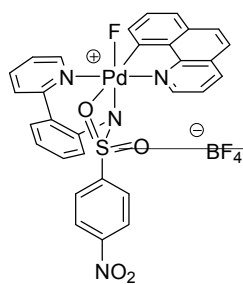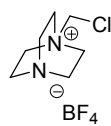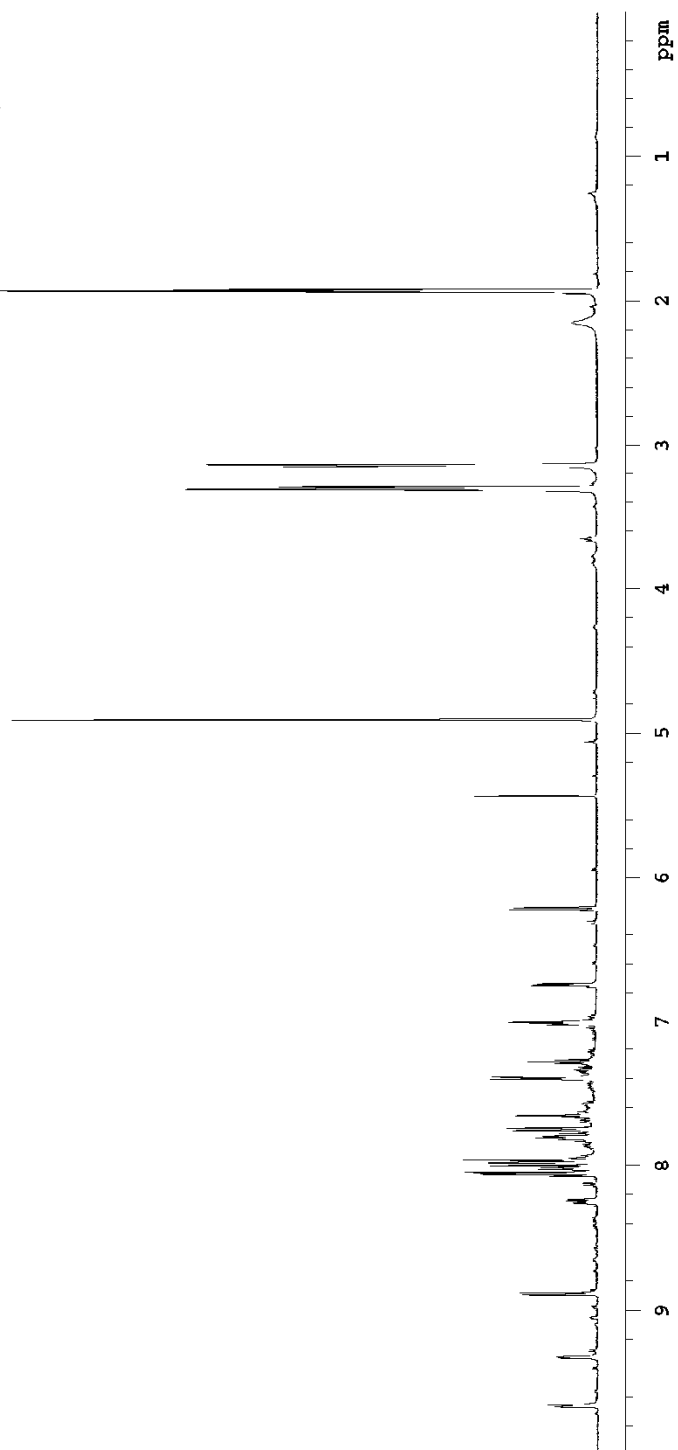

$^1\text{H}$  NMR (acetonitrile- $d_3$ , 23 °C) of 6b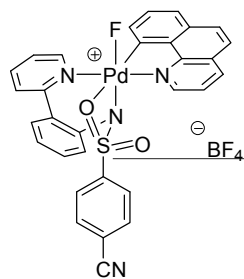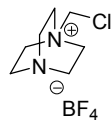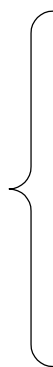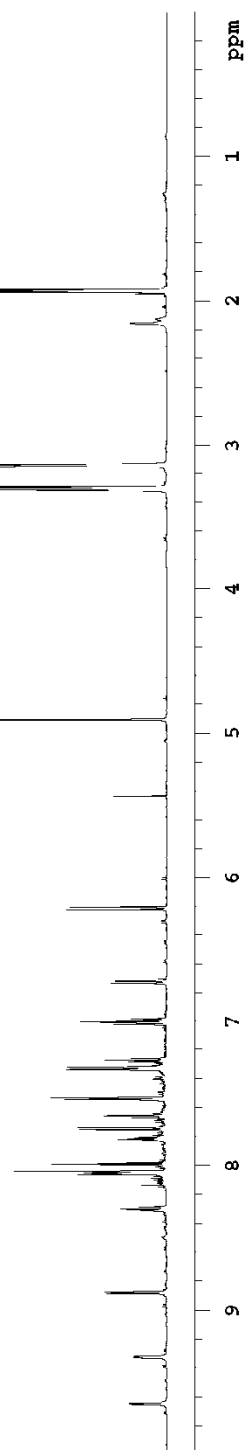

$^1\text{H}$  NMR (acetonitrile- $d_3$ , 23 °C) of **6c**

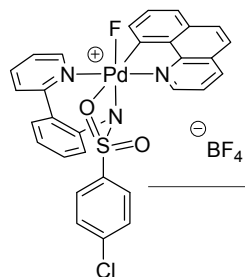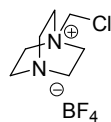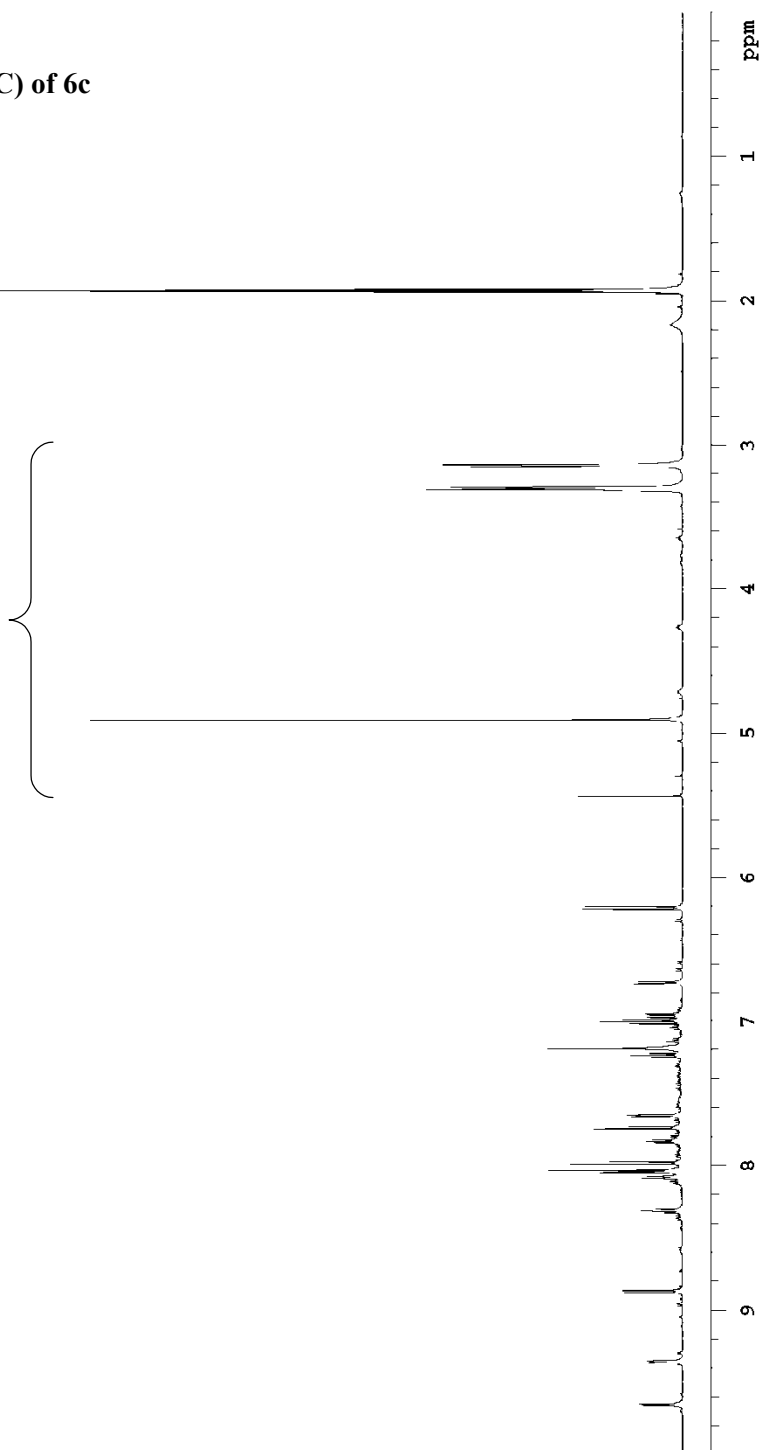

$^1\text{H}$  NMR (acetonitrile- $d_3$ , 23 °C) of 6d

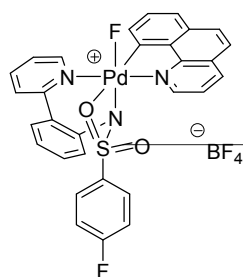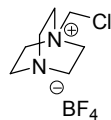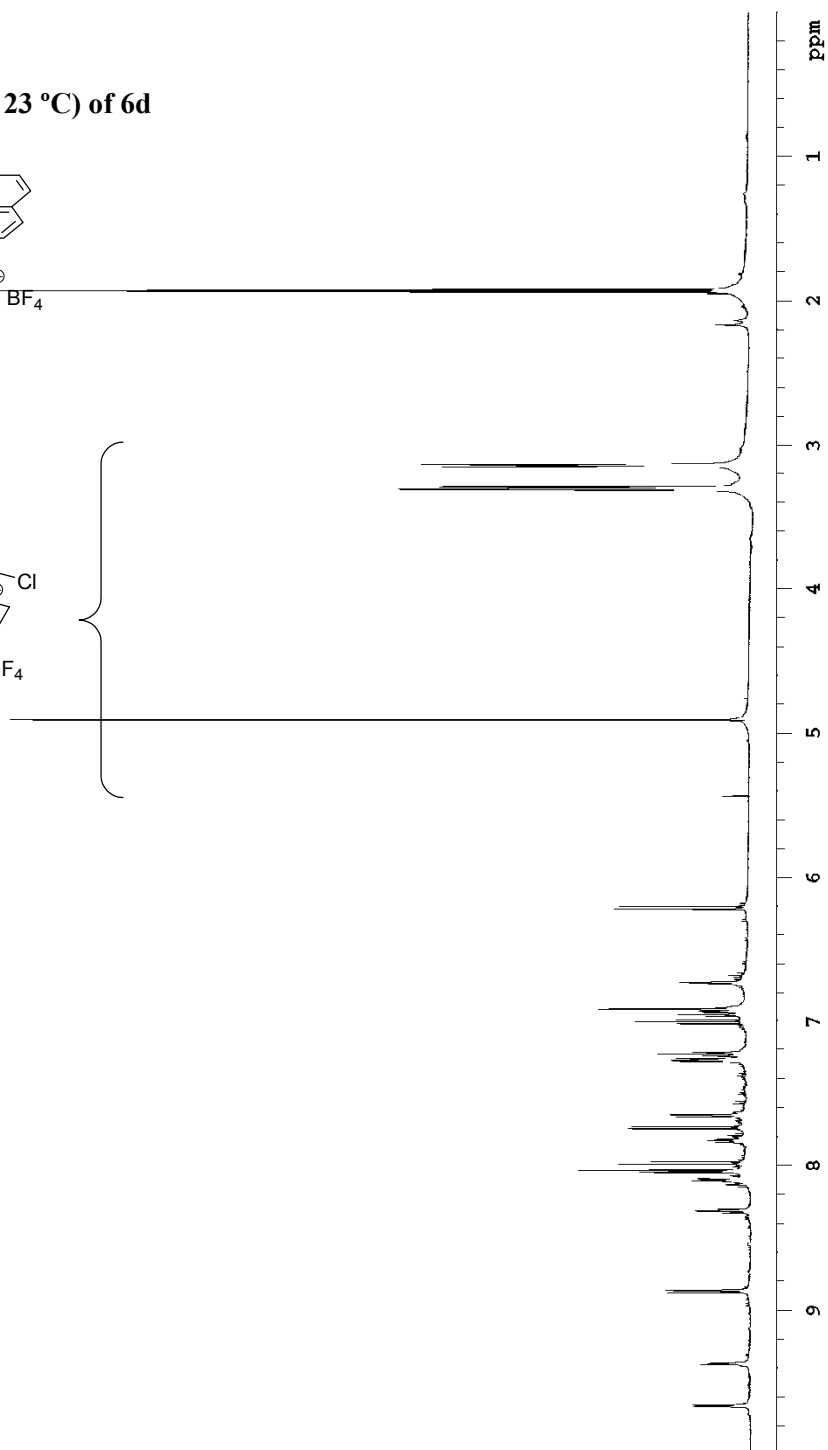

$^1\text{H}$  NMR (acetonitrile- $d_3$ , 23 °C) of 6e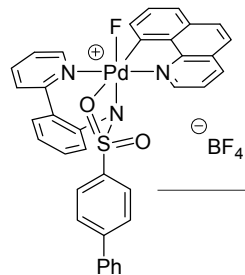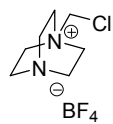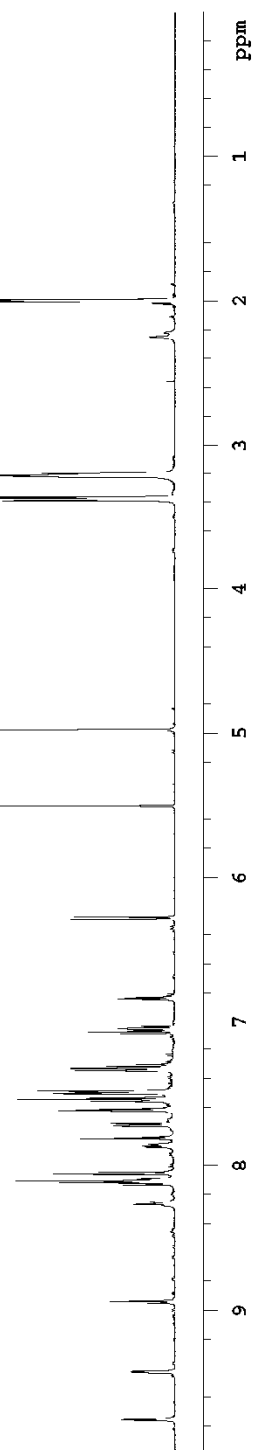

$^1\text{H}$  NMR (acetonitrile- $d_3$ , 23 °C) of 6f

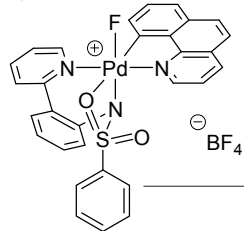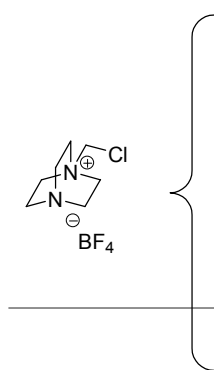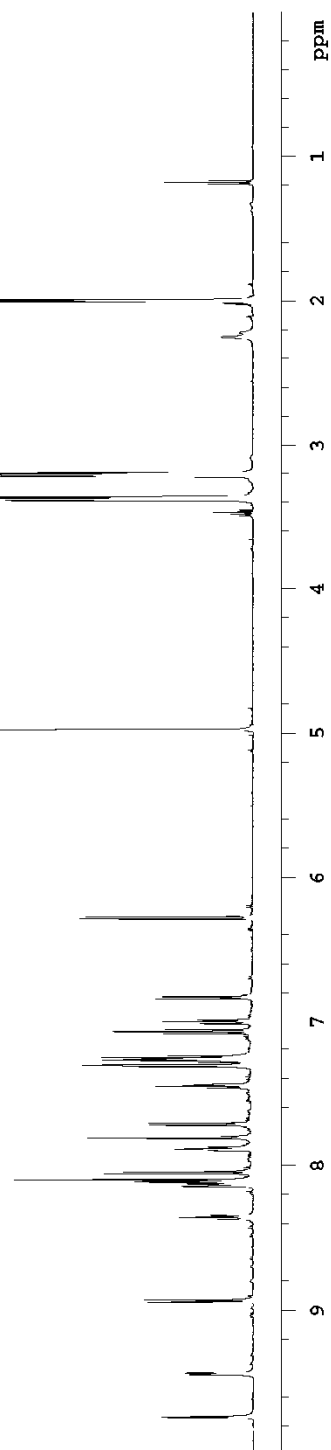

$^1\text{H}$  NMR (acetonitrile- $d_3$ , 23 °C) of 6g

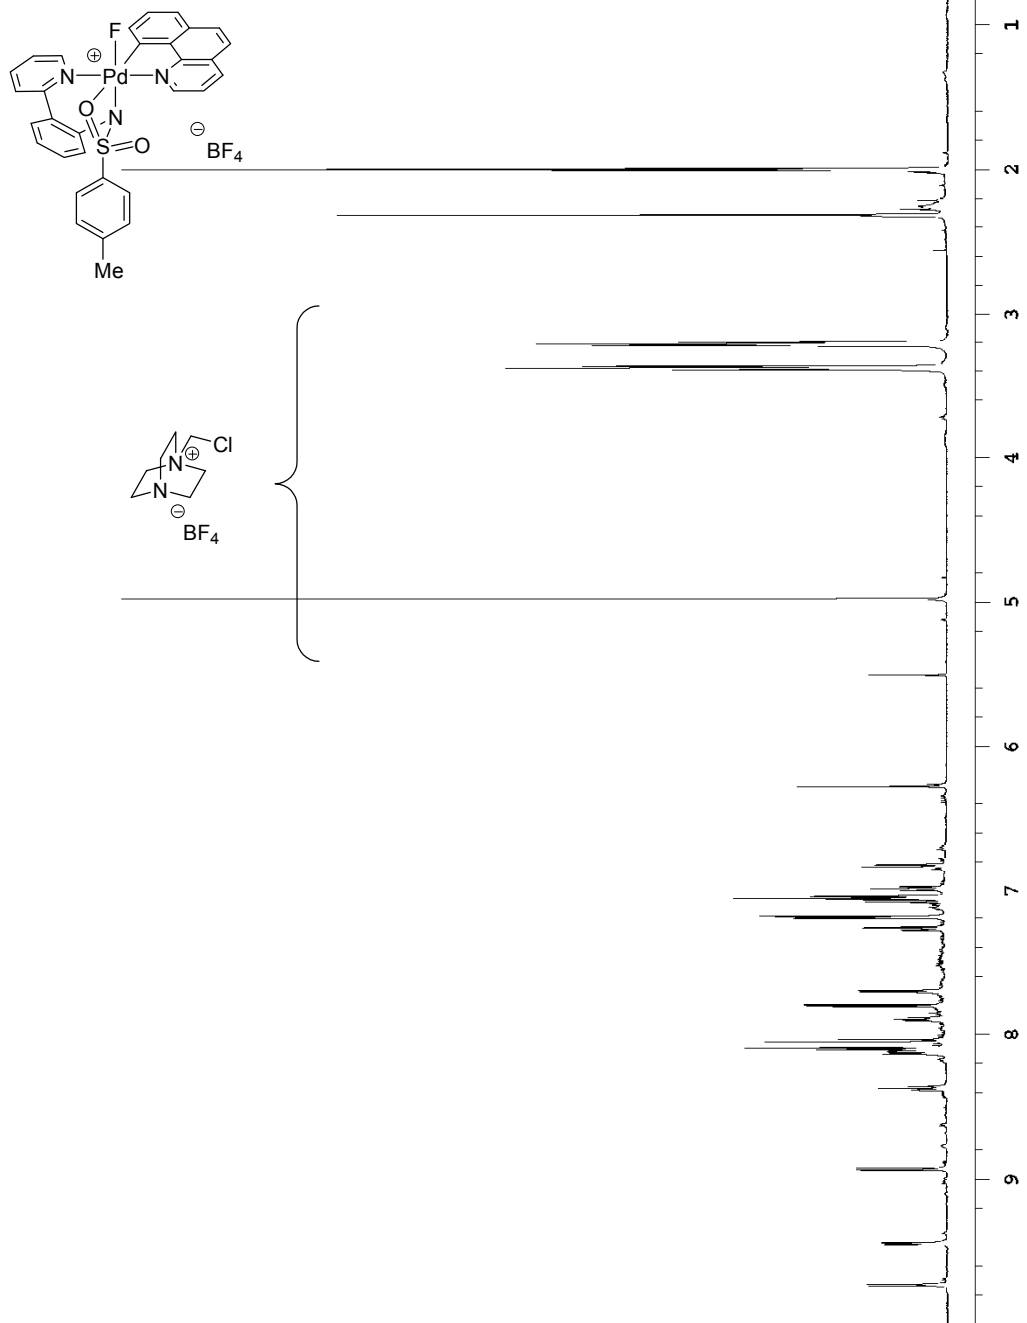

$^1\text{H}$  NMR (acetonitrile- $d_3$ , 23 °C) of 6h

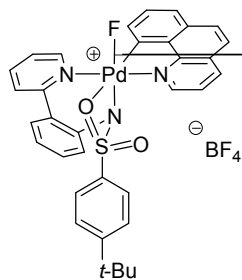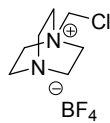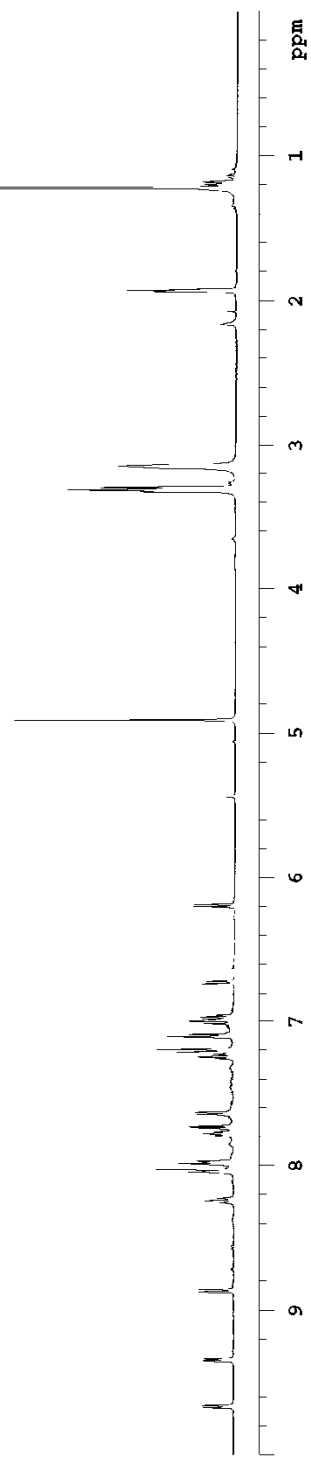



$^1\text{H}$  NMR ( $\text{CDCl}_3$ , 23 °C) of S23

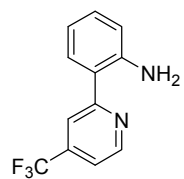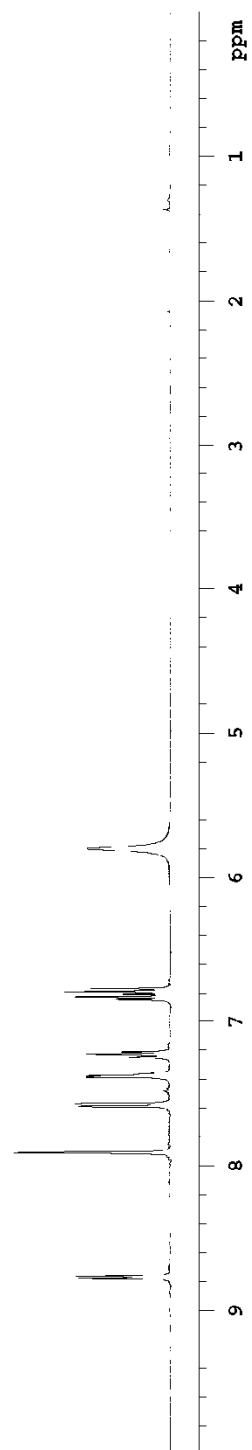

$^{13}\text{C}$  NMR ( $\text{CDCl}_3$ , 23 °C) of S23

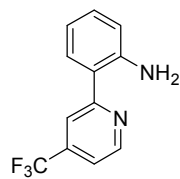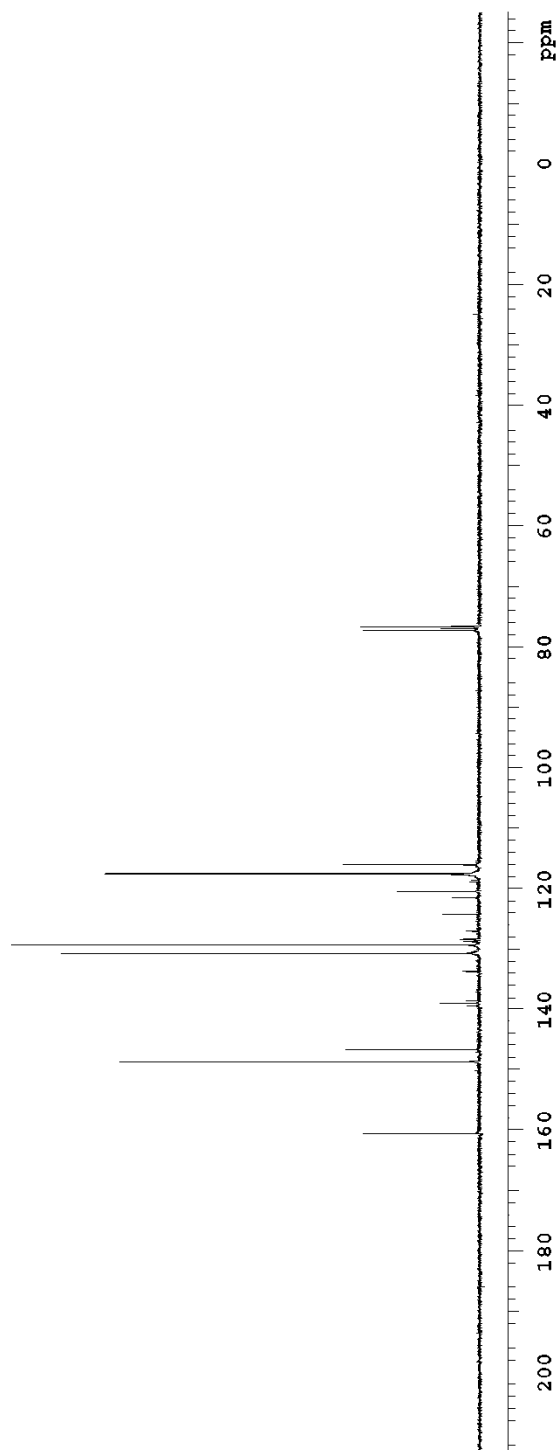

$^1\text{H NMR}$  ( $\text{CDCl}_3$ , 23 °C) of S24

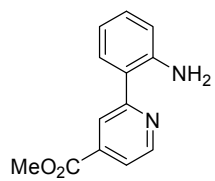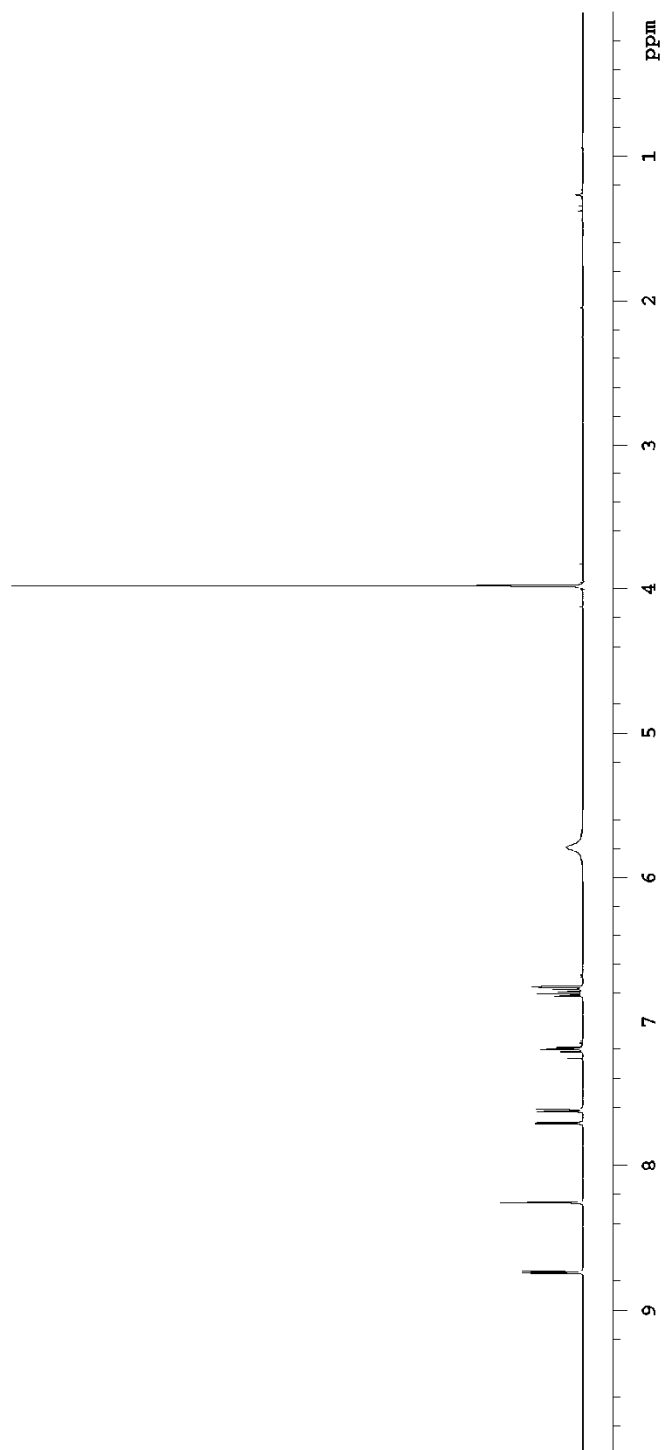

$^{13}\text{C}$  NMR ( $\text{CDCl}_3$ , 23 °C) of S24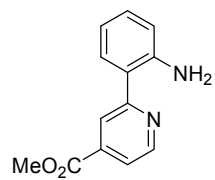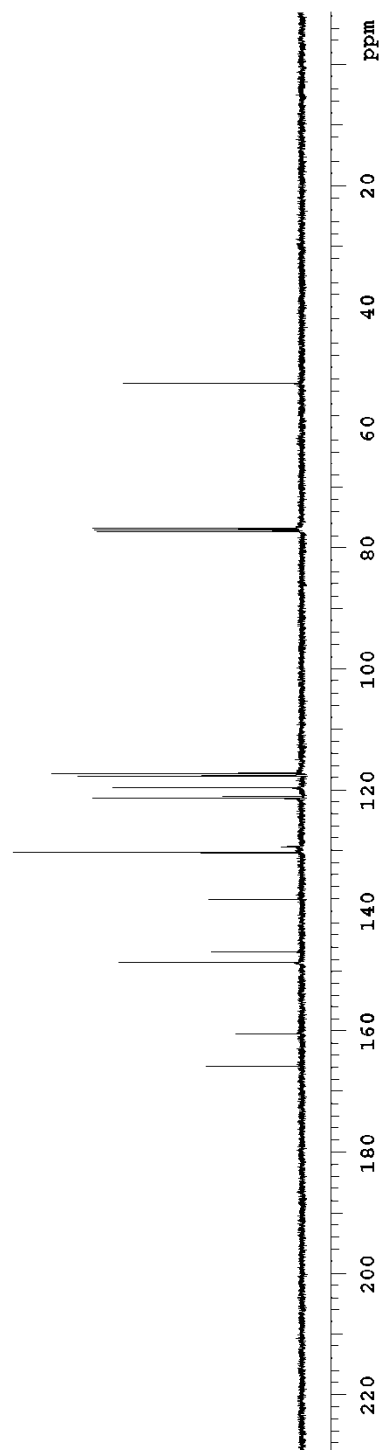

$^1\text{H}$  NMR ( $\text{CDCl}_3$ , 23 °C) of S25

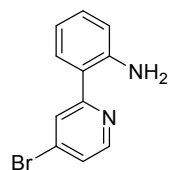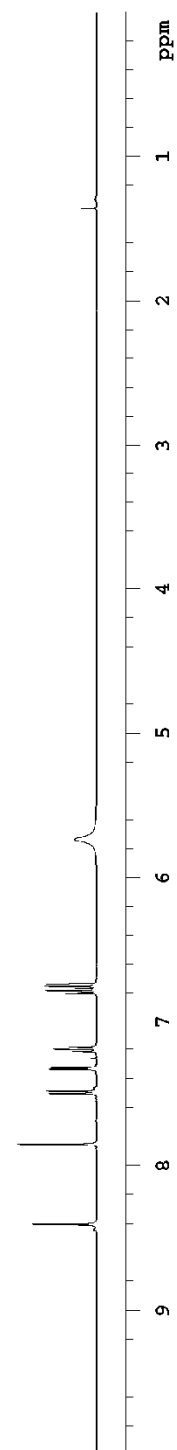

$^{13}\text{C}$  NMR ( $\text{CDCl}_3$ , 23 °C) of S25

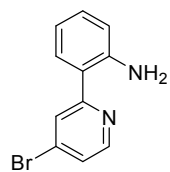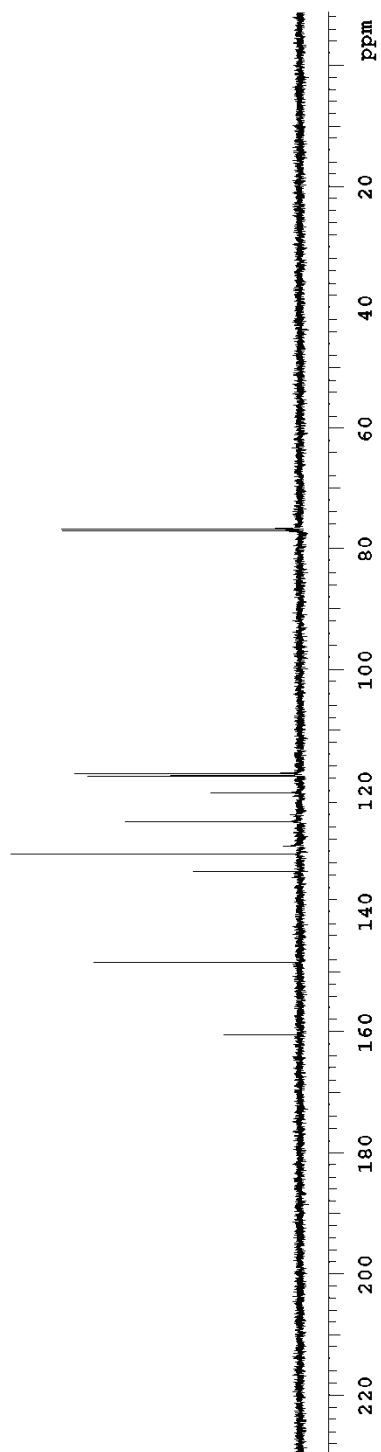

$^1\text{H}$  NMR ( $\text{CDCl}_3$ , 23 °C) of S26

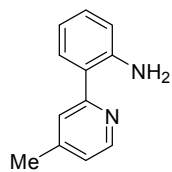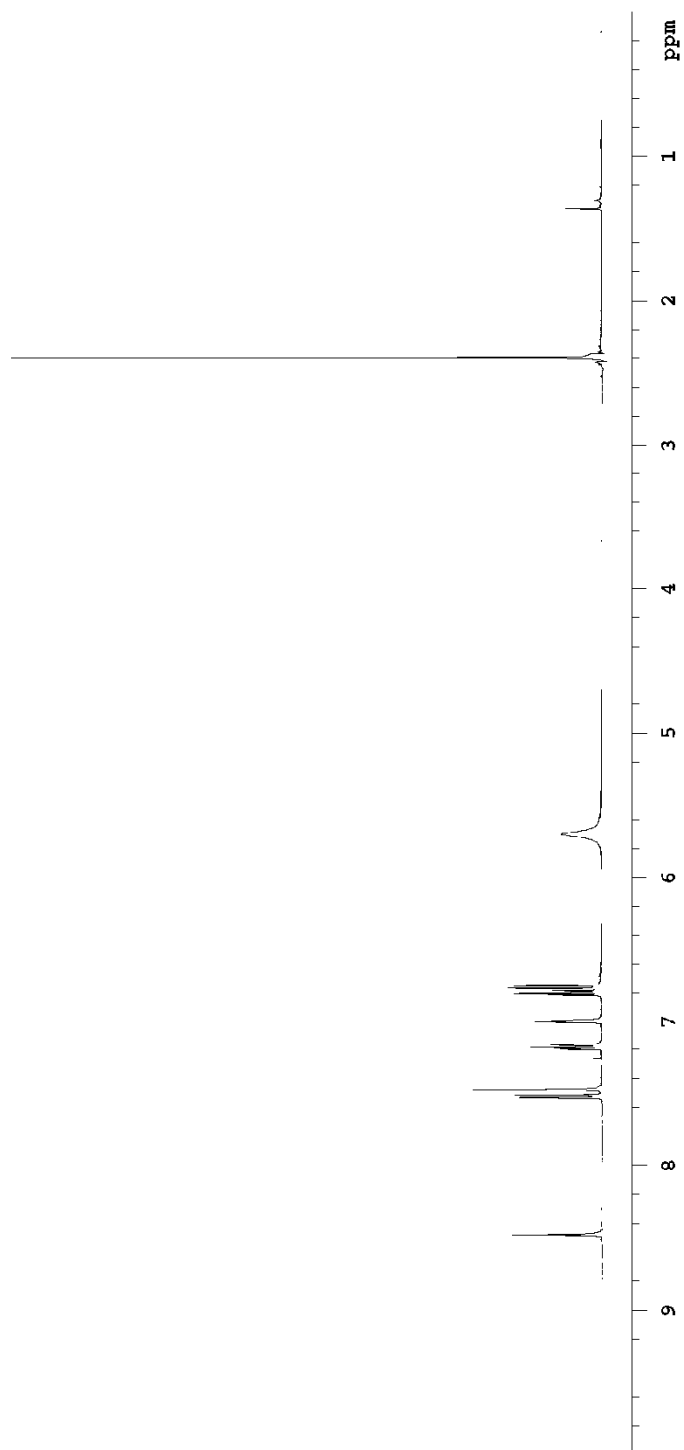

$^{13}\text{C}$  NMR ( $\text{CDCl}_3$ , 23 °C) of S26

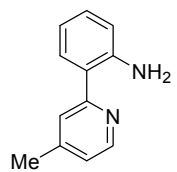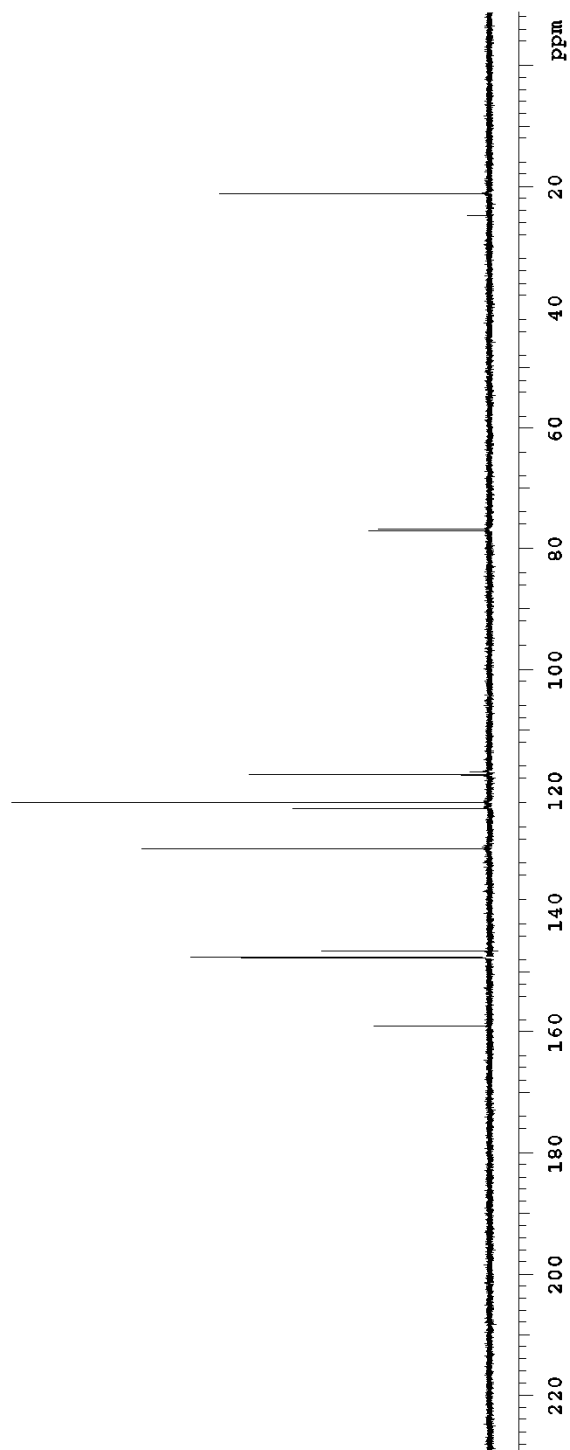



<sup>1</sup>H NMR (CDCl<sub>3</sub>, 23 °C) of S27

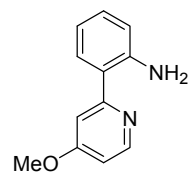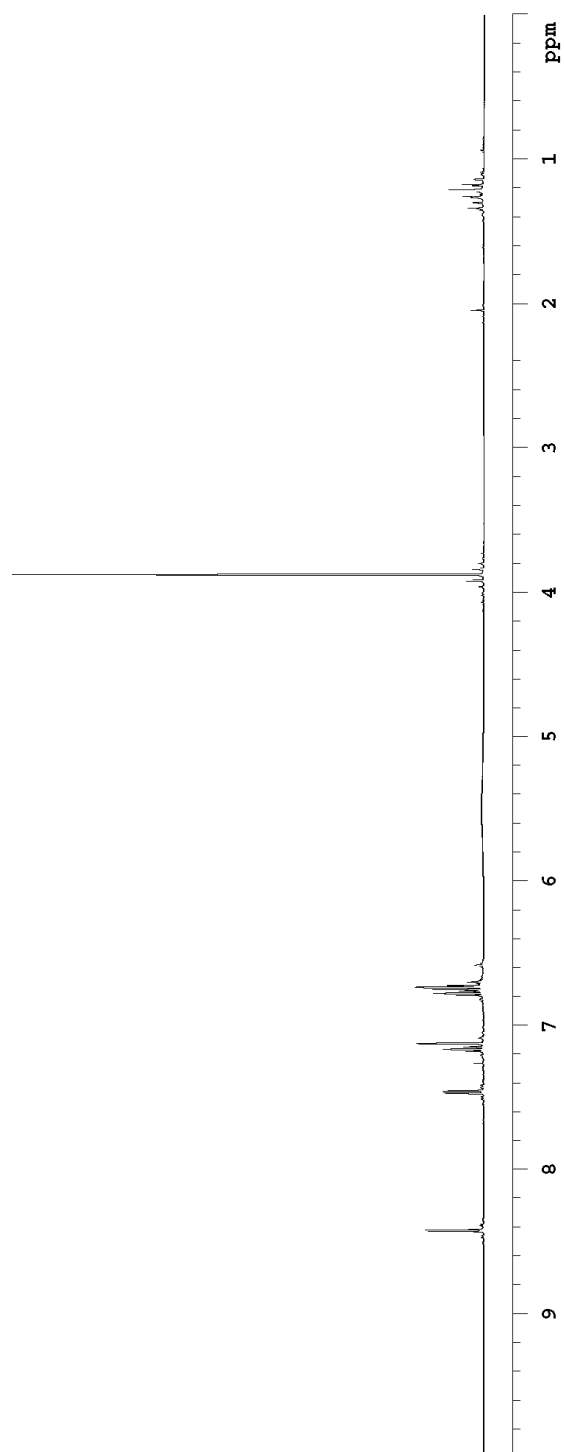

$^{13}\text{C}$  NMR ( $\text{CDCl}_3$ , 23 °C) of S27

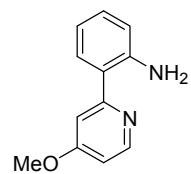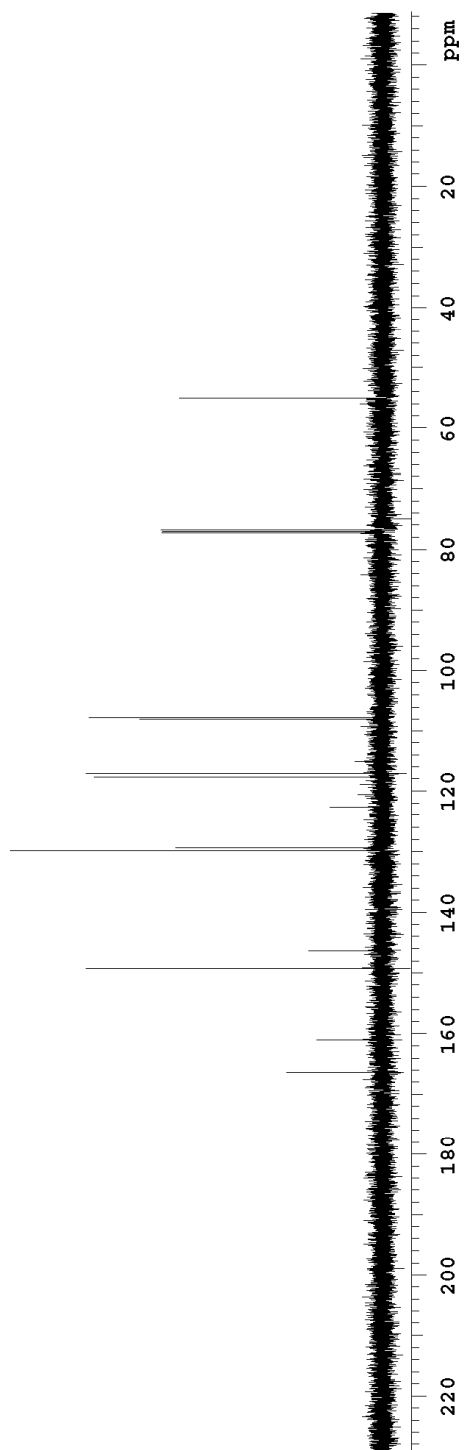

$^1\text{H}$  NMR ( $\text{CDCl}_3$ , 23 °C) of S28

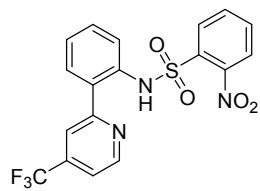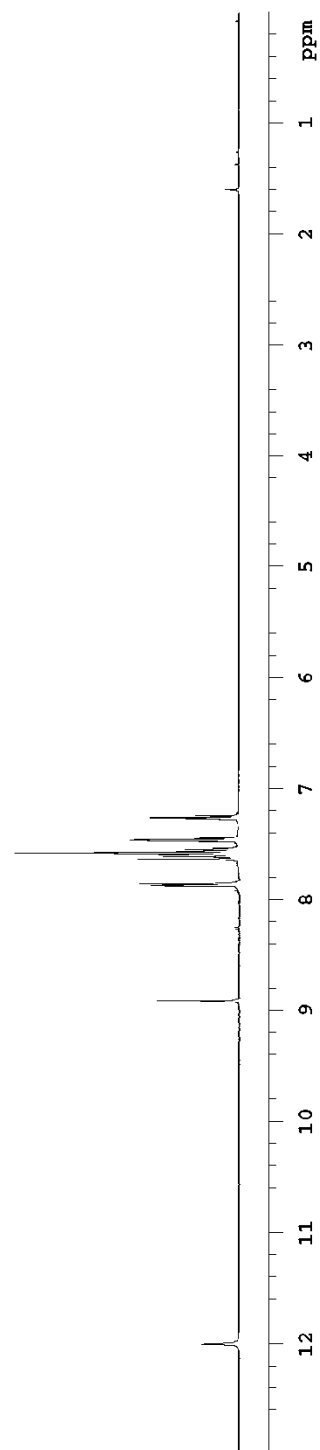

$^{13}\text{C}$  NMR ( $\text{CDCl}_3$ , 23 °C) of S28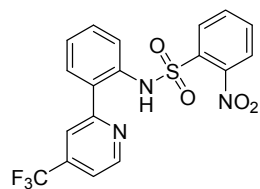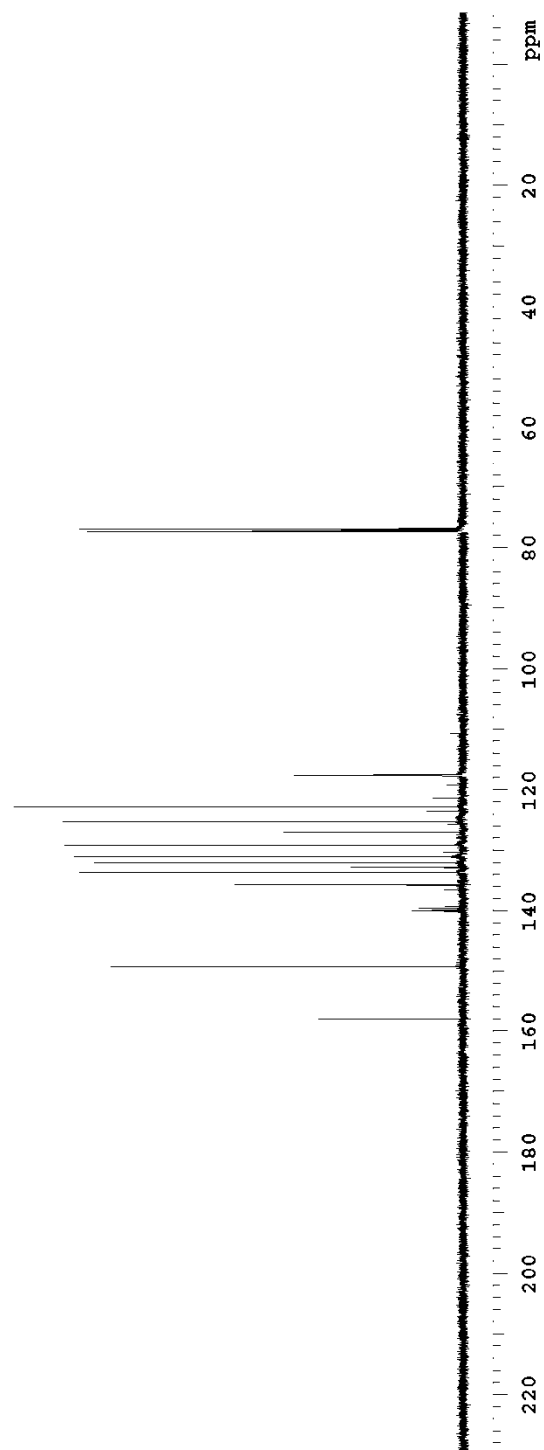

**<sup>1</sup>H NMR (CDCl<sub>3</sub>, 23 °C) of S29**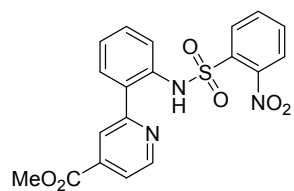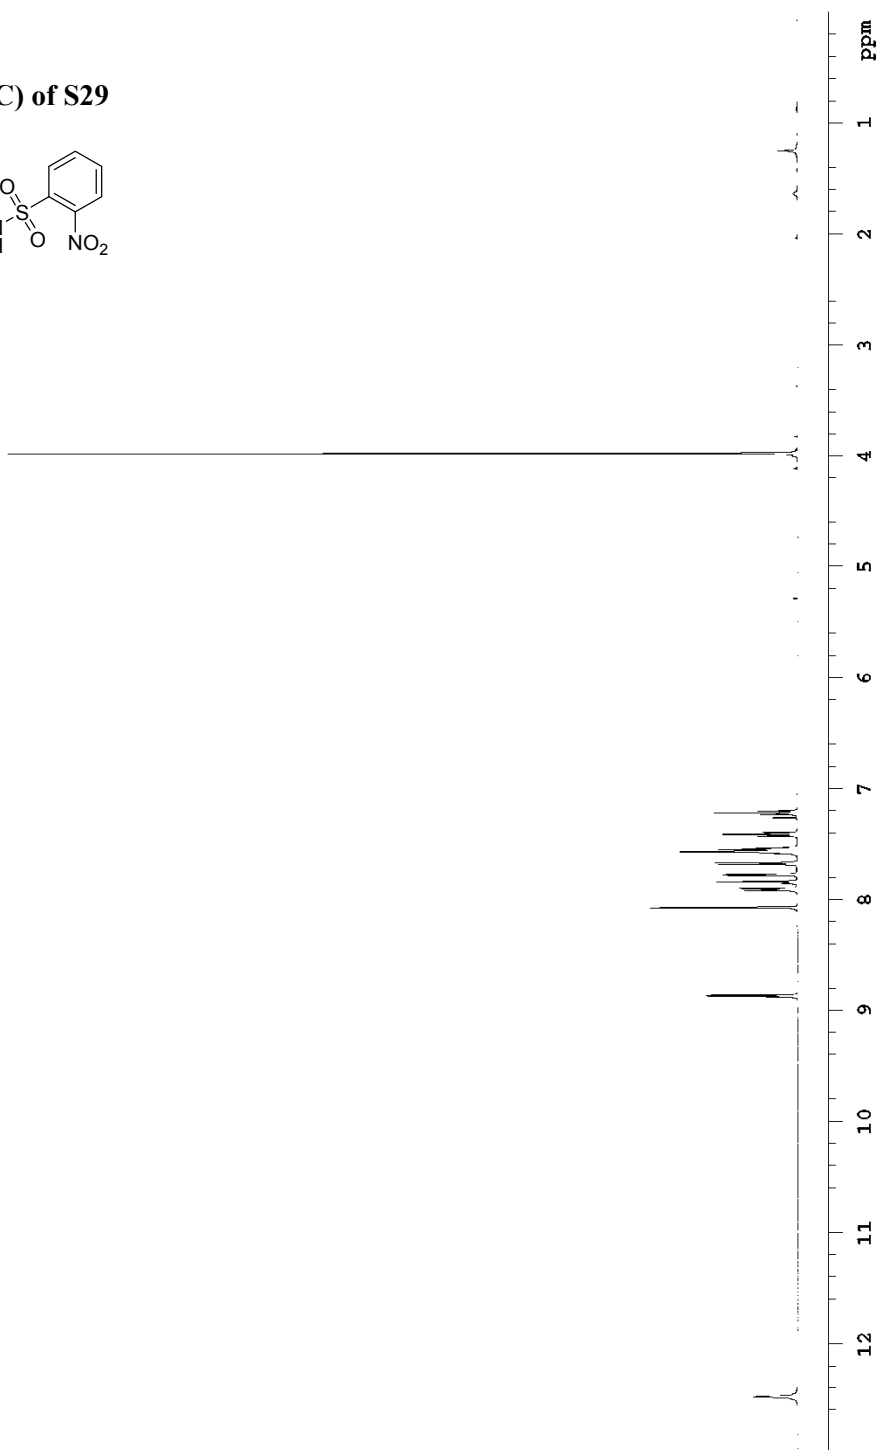

$^{13}\text{C}$  NMR ( $\text{CDCl}_3$ , 23 °C) of S29

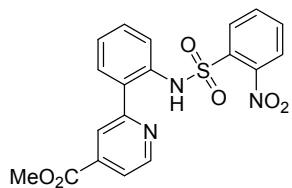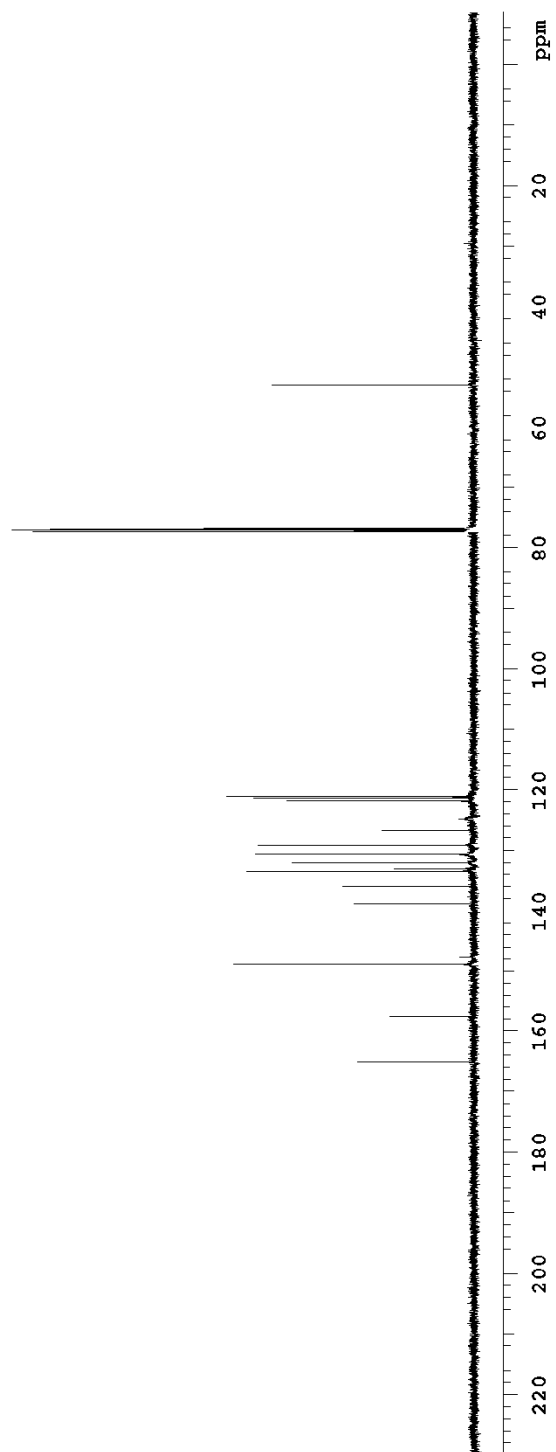

<sup>1</sup>H NMR (CDCl<sub>3</sub>, 23 °C) of S30

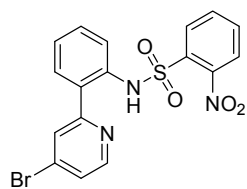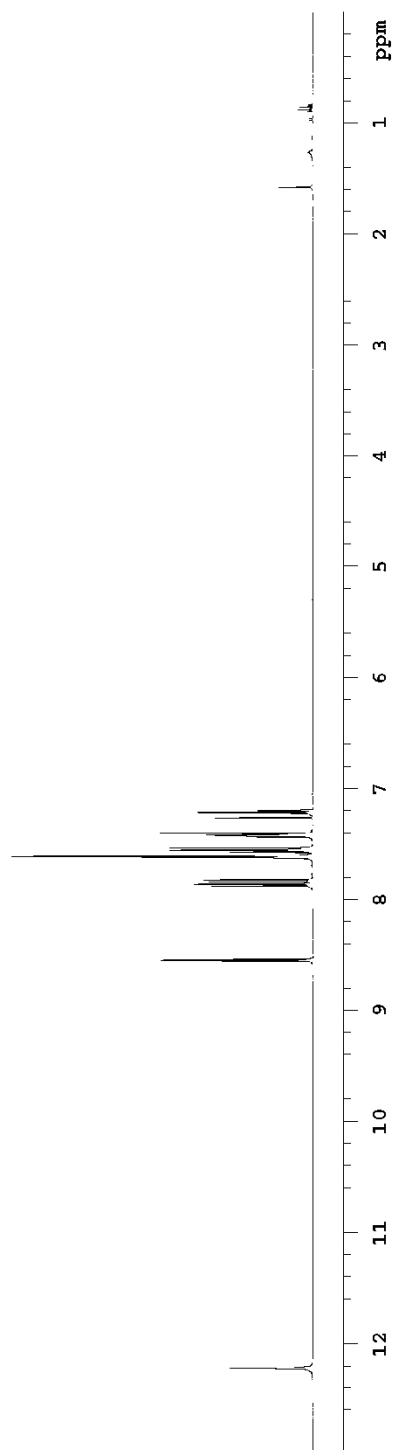

$^{13}\text{C}$  NMR ( $\text{CDCl}_3$ , 23 °C) of S30

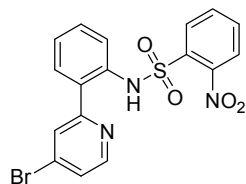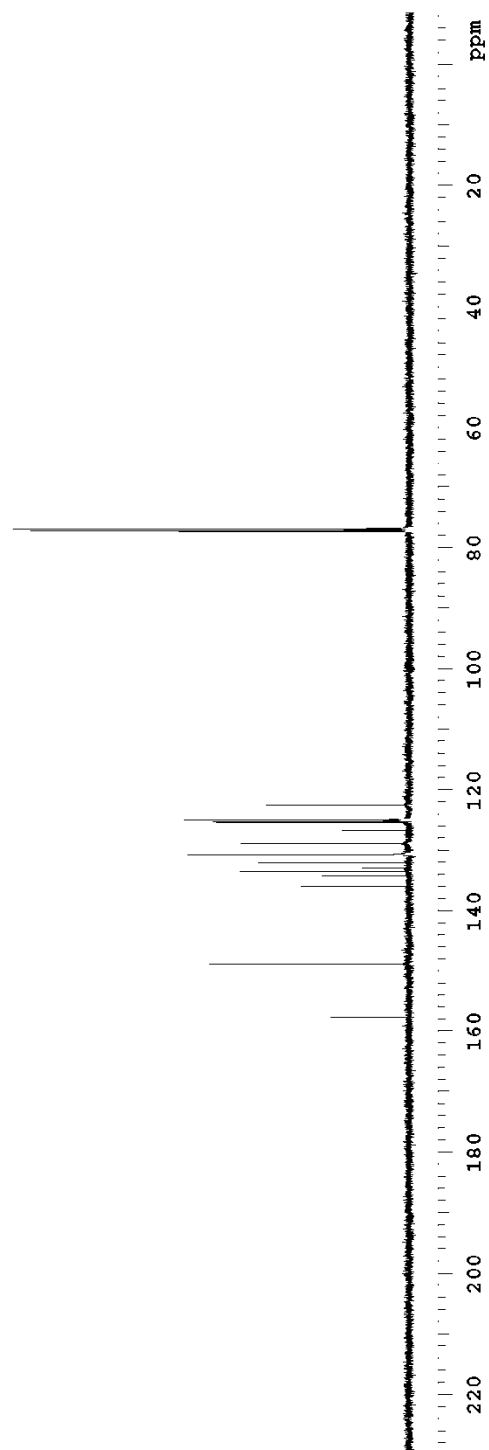



$^1\text{H}$  NMR ( $\text{CDCl}_3$ , 23 °C) of S31

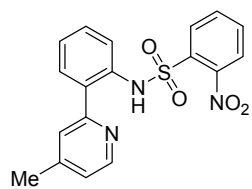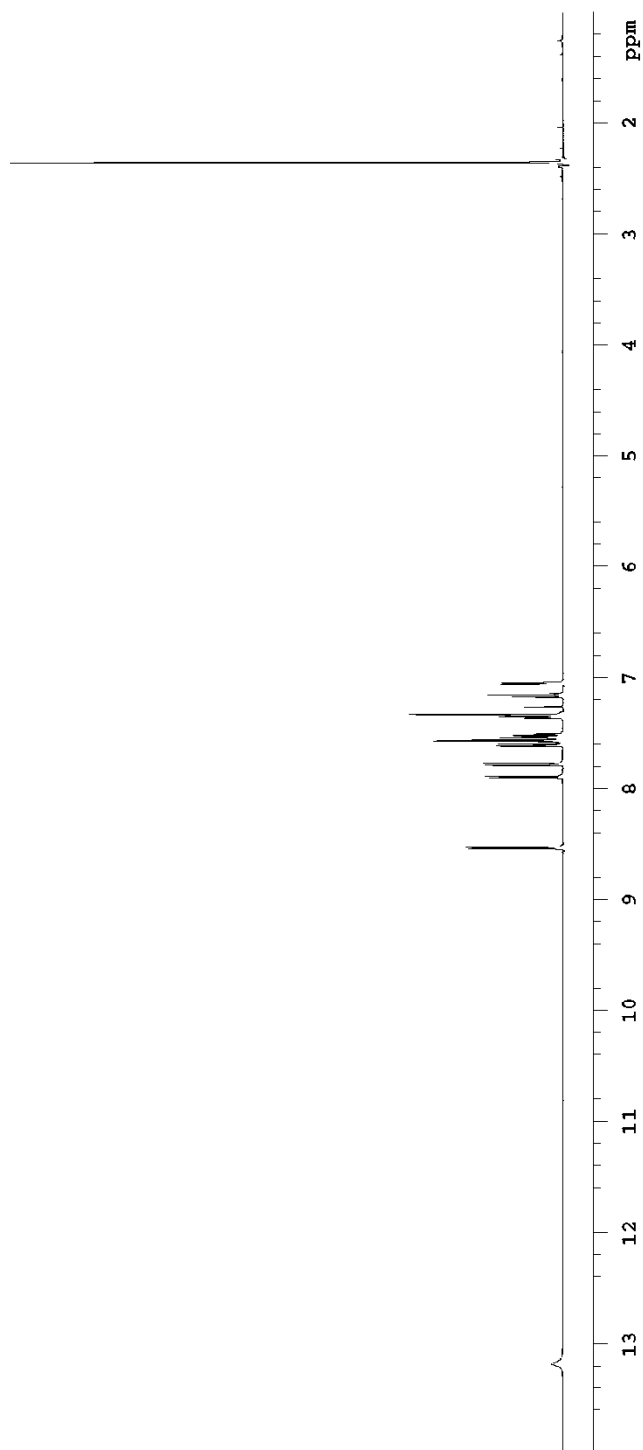

$^{13}\text{C}$  NMR ( $\text{CDCl}_3$ , 23 °C) of S31

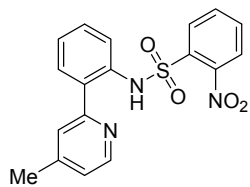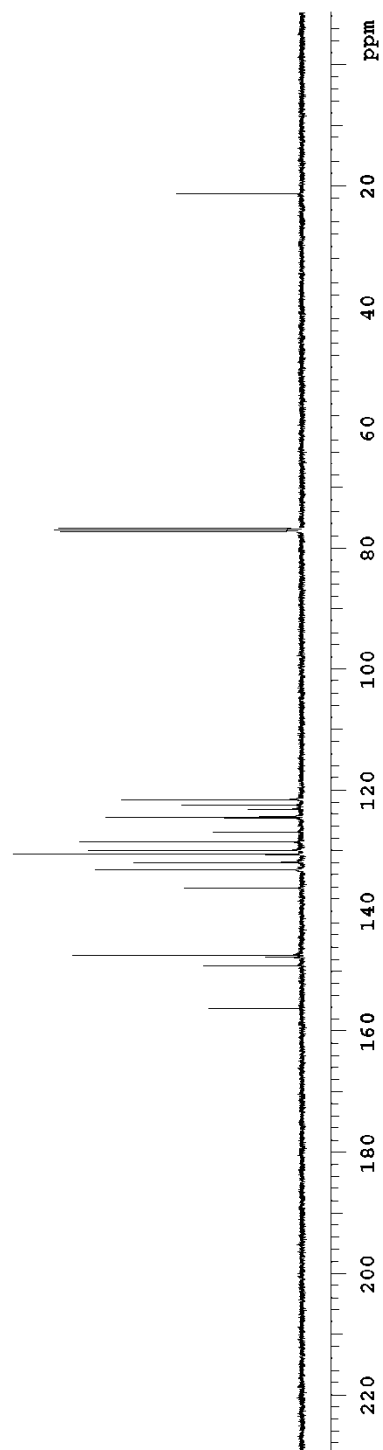

$^1\text{H}$  NMR ( $\text{CDCl}_3$ , 23 °C) of S32

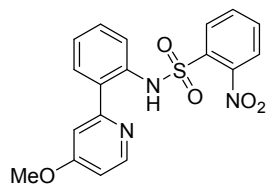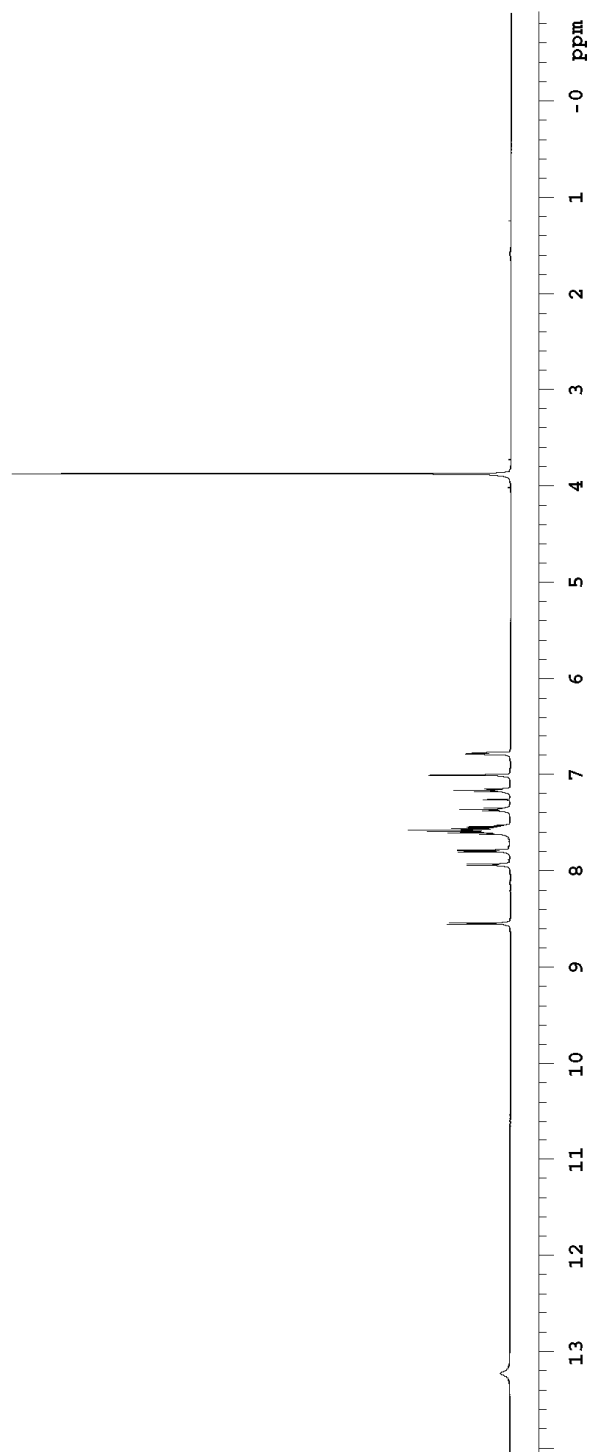

$^{13}\text{C}$  NMR ( $\text{CDCl}_3$ , 23 °C) of S32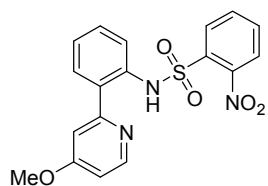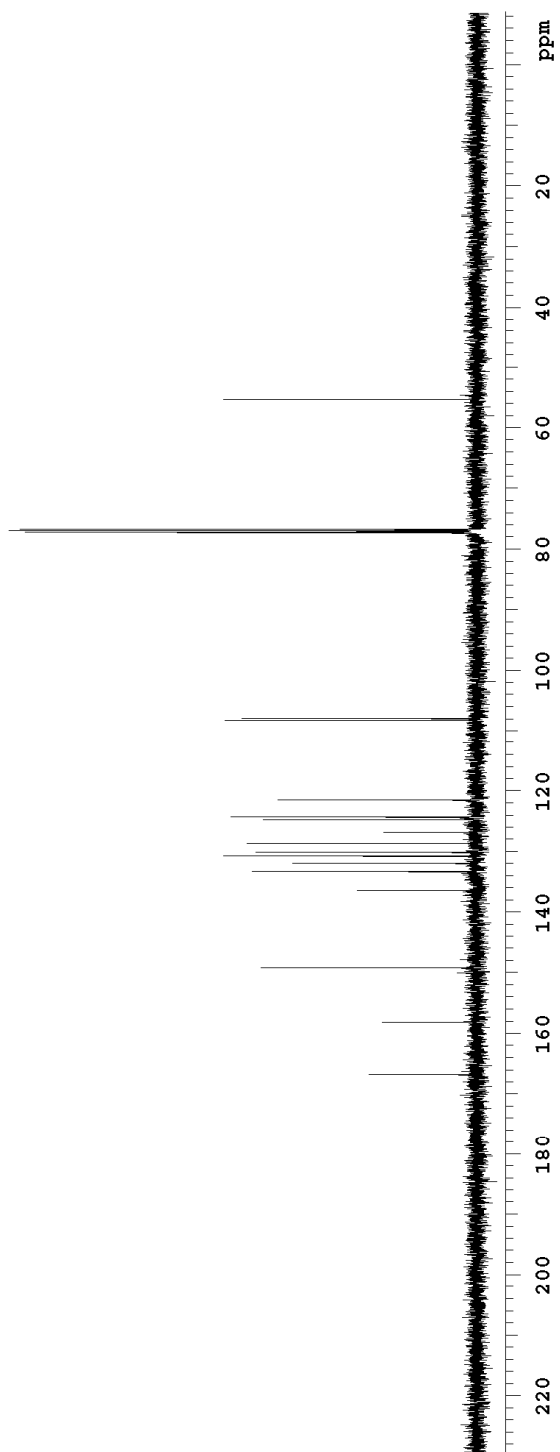

$^1\text{H}$  NMR ( $\text{CDCl}_3$ , 23 °C) of S33

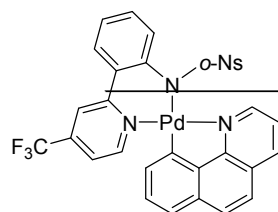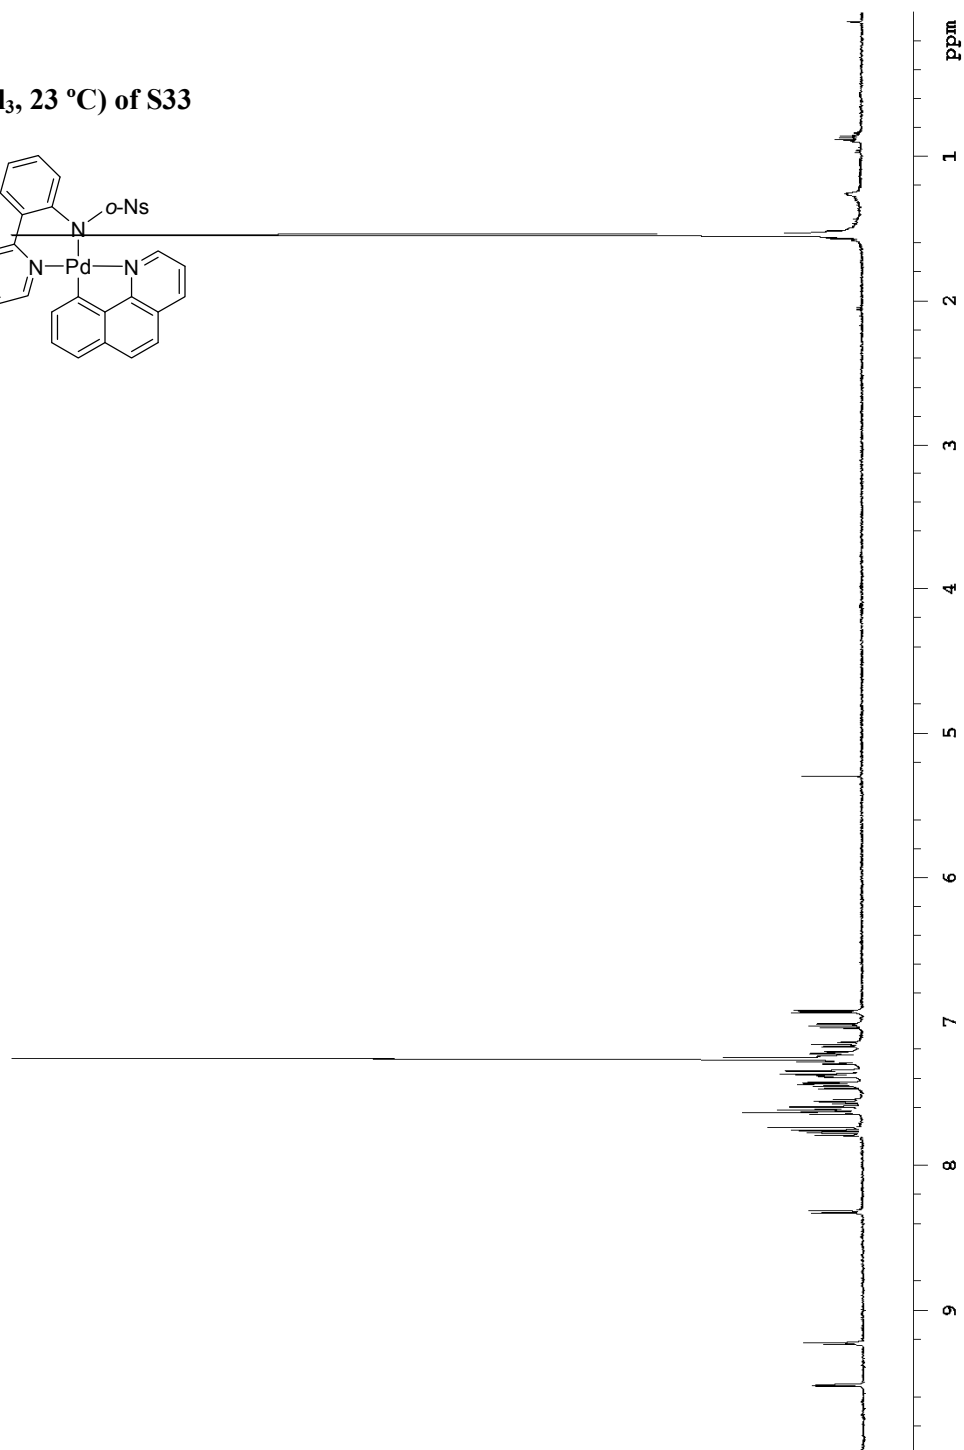

$^1\text{H}$  NMR ( $\text{CDCl}_3$ , 23 °C) of S34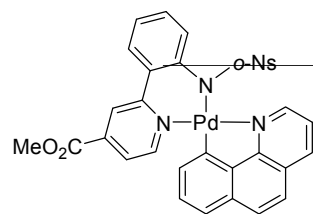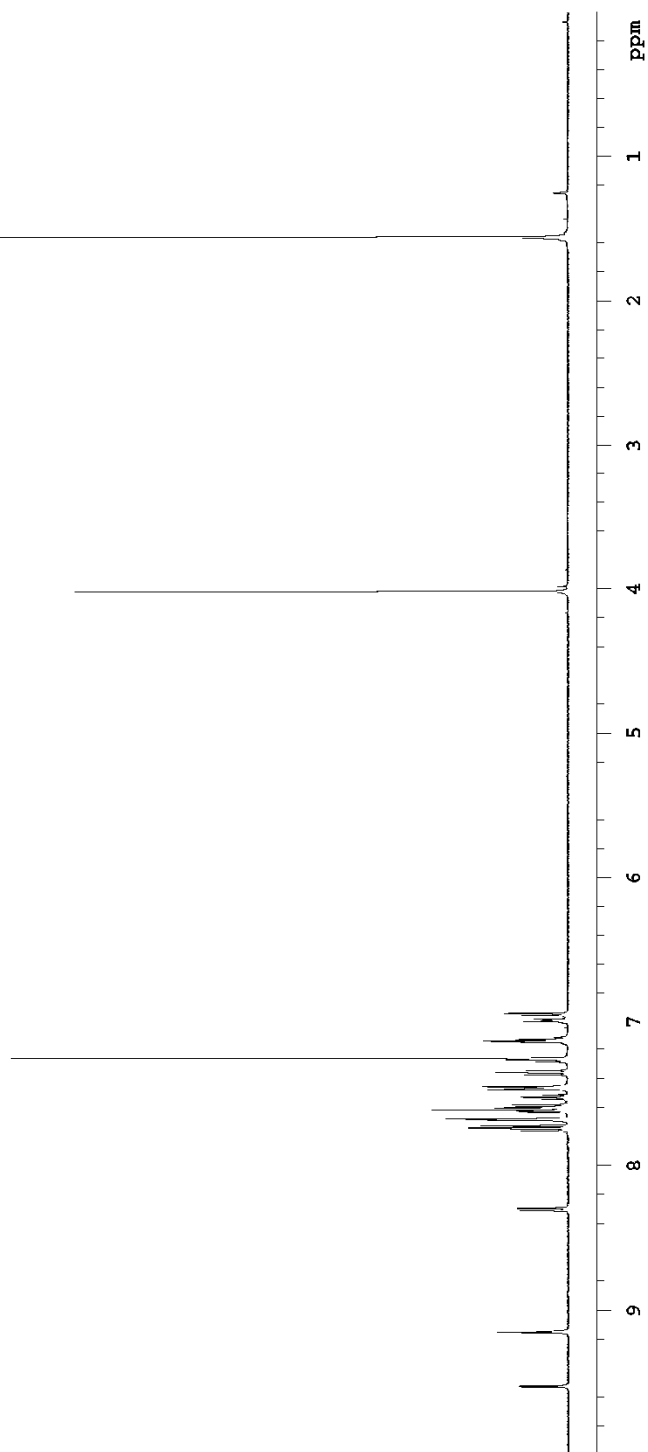

$^1\text{H}$  NMR ( $\text{CDCl}_3$ , 23 °C) of S35

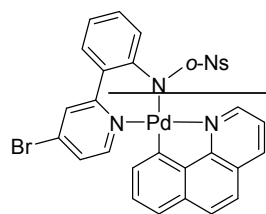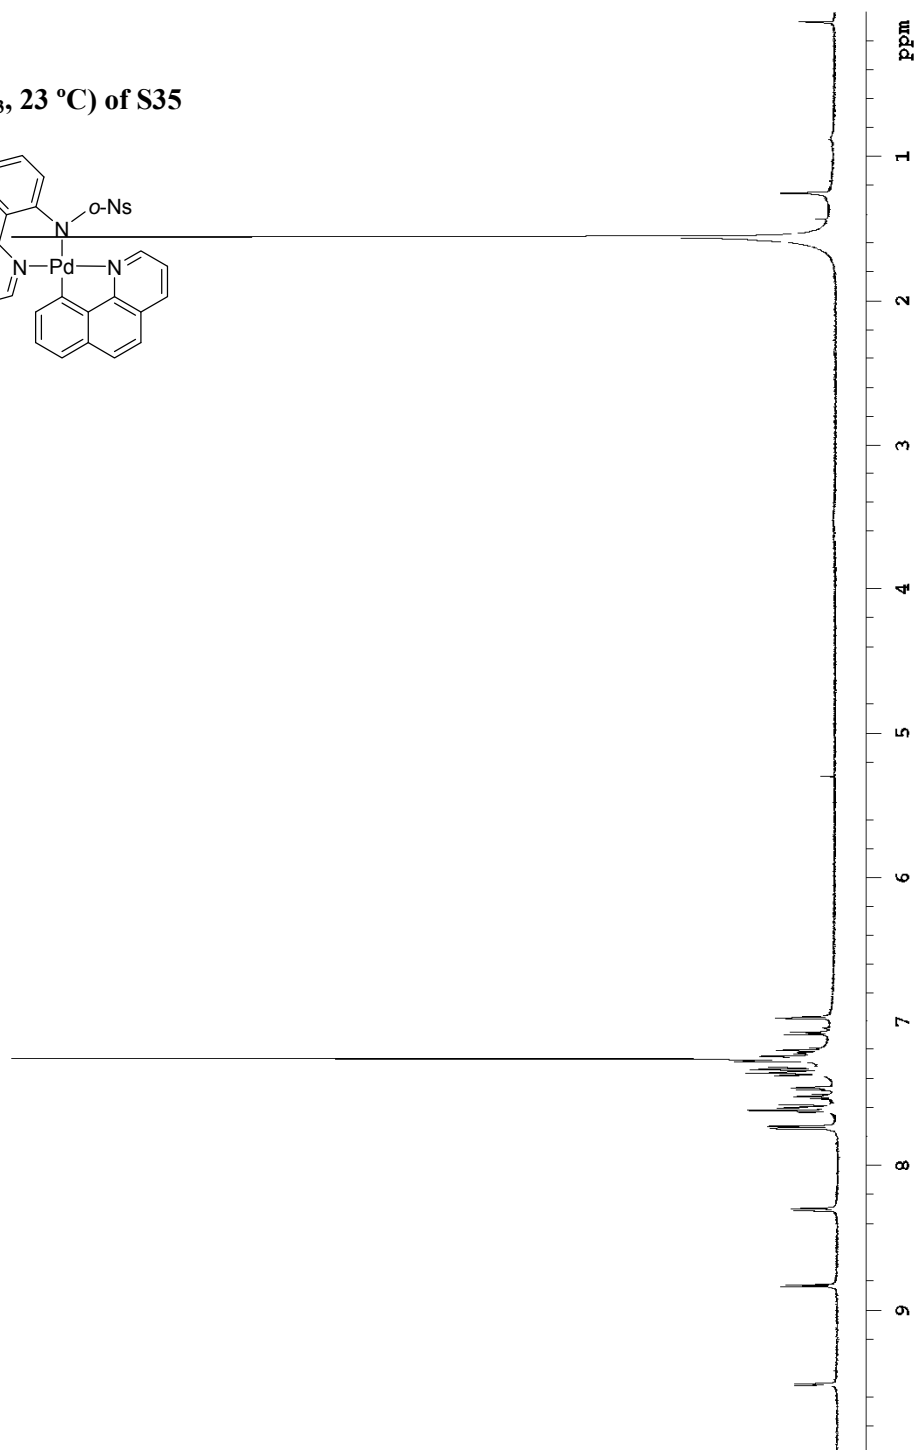

$^1\text{H}$  NMR ( $\text{CDCl}_3$ , 23 °C) of S36

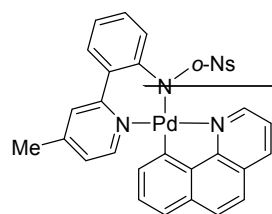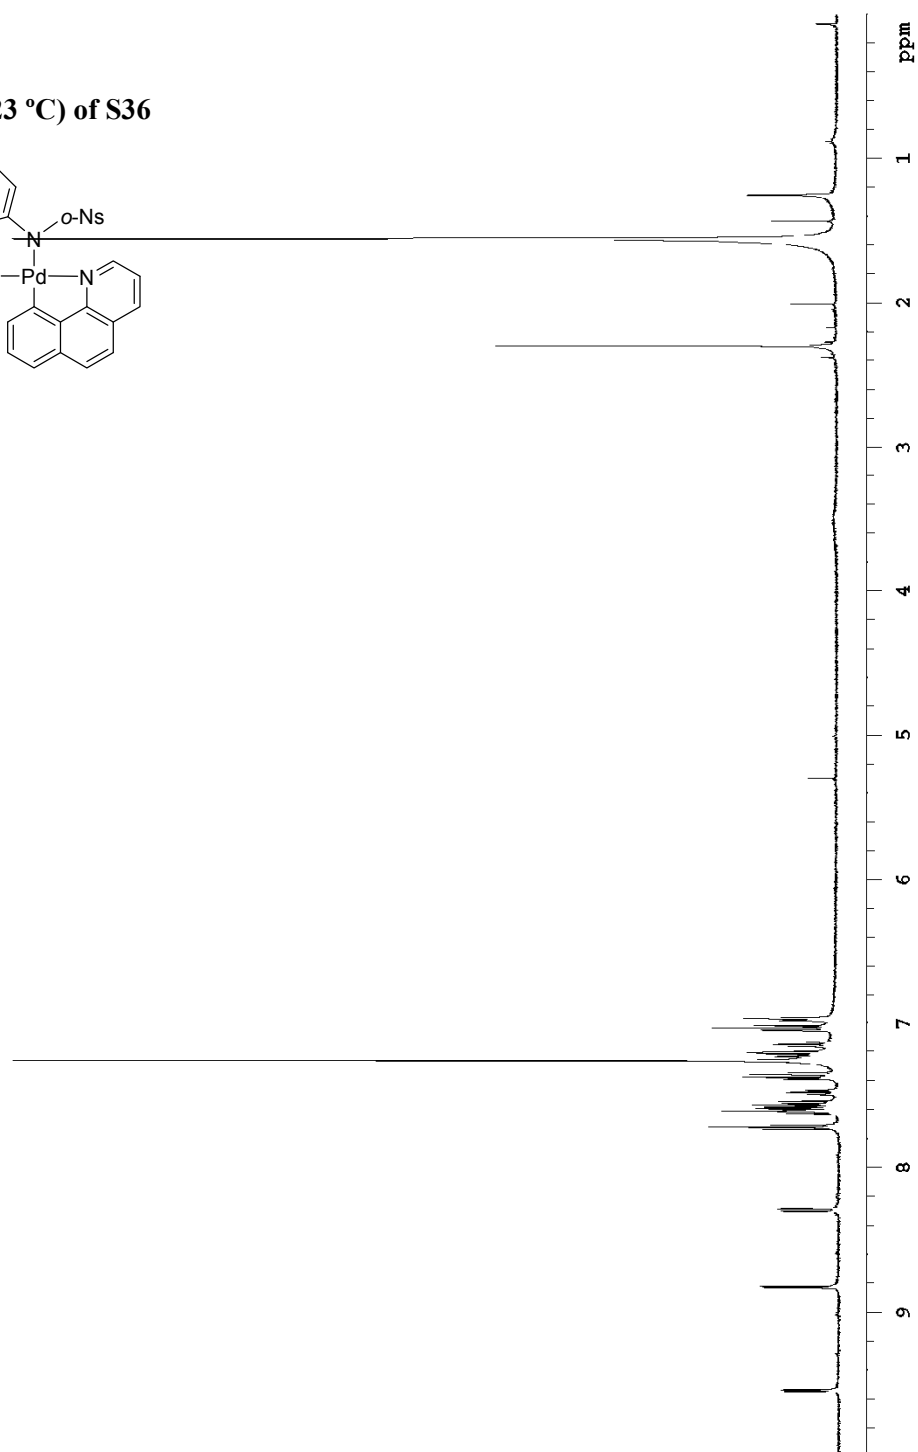



$^1\text{H}$  NMR ( $\text{CDCl}_3$ , 23 °C) of S37

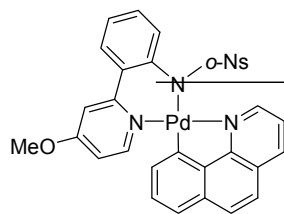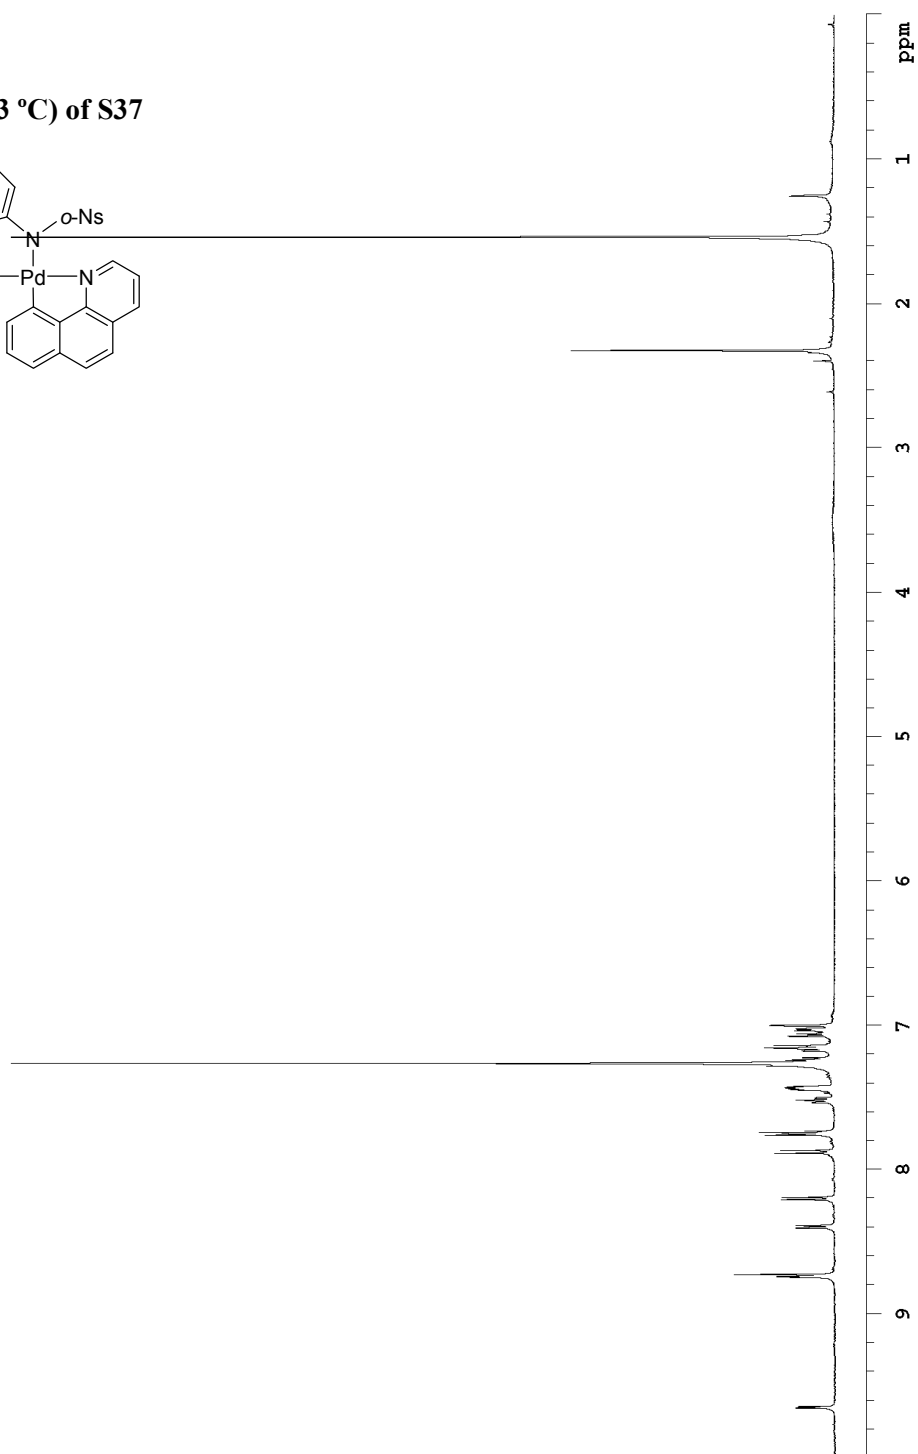

$^1\text{H NMR}$  ( $\text{CDCl}_3$ , 23 °C) of 7a

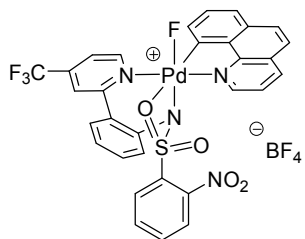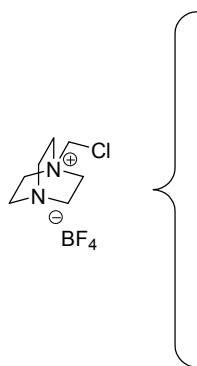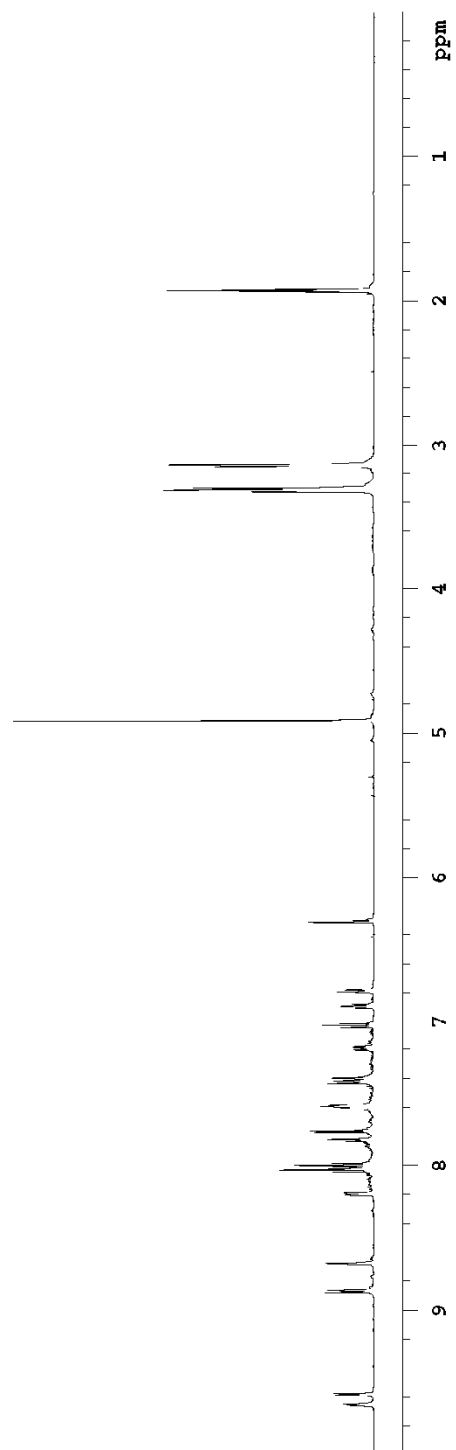

$^1\text{H}$  NMR ( $\text{CDCl}_3$ , 23 °C) of 7b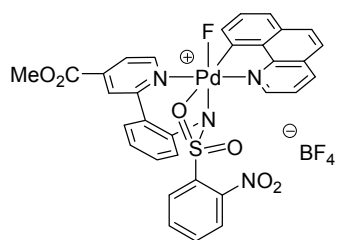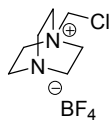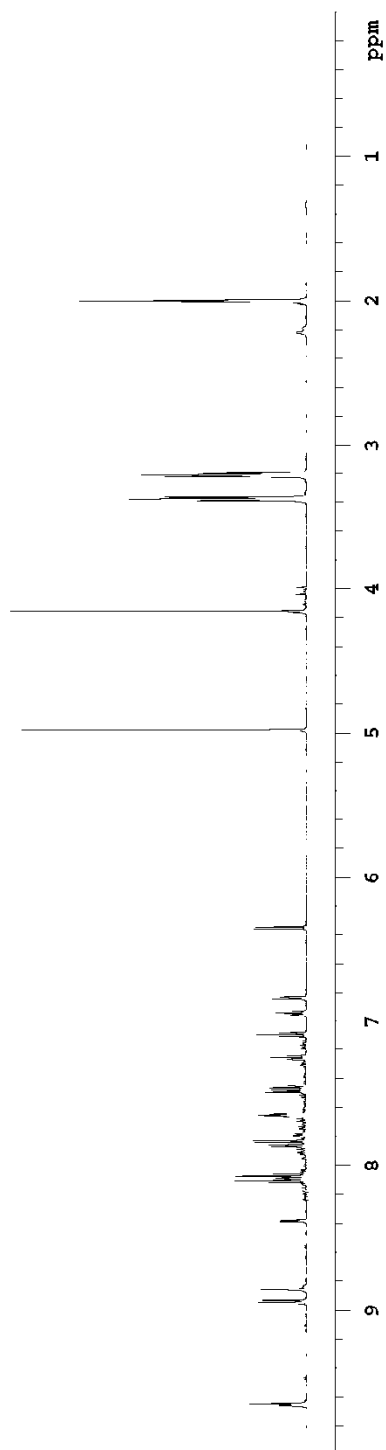

$^1\text{H}$  NMR ( $\text{CDCl}_3$ , 23 °C) of 7c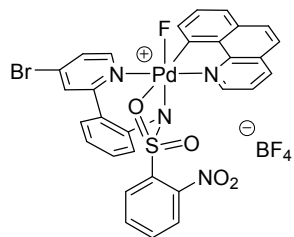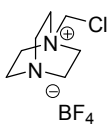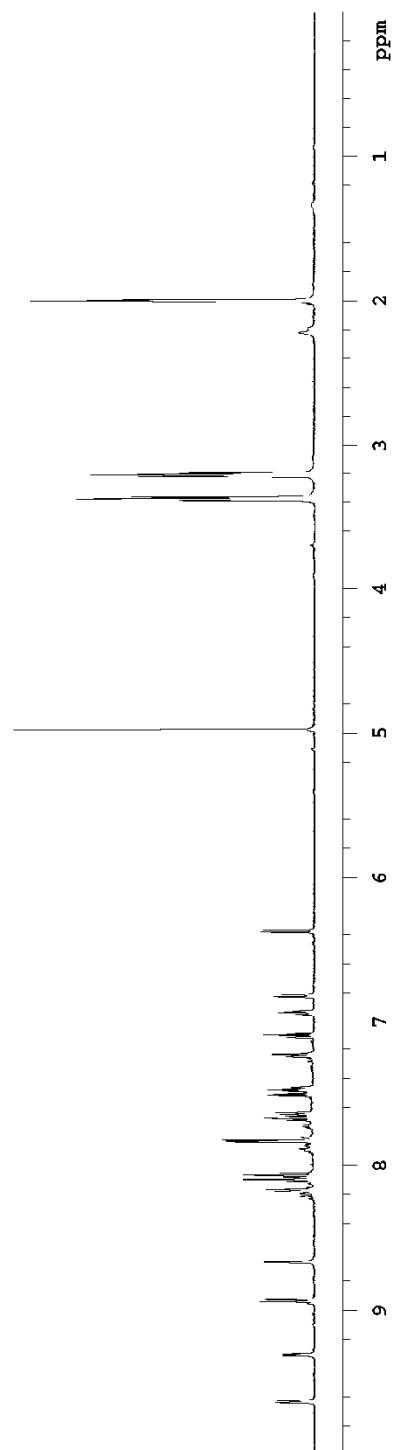

$^1\text{H}$  NMR ( $\text{CDCl}_3$ , 23 °C) of 7e

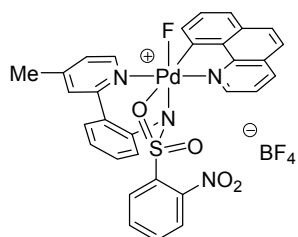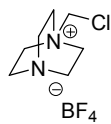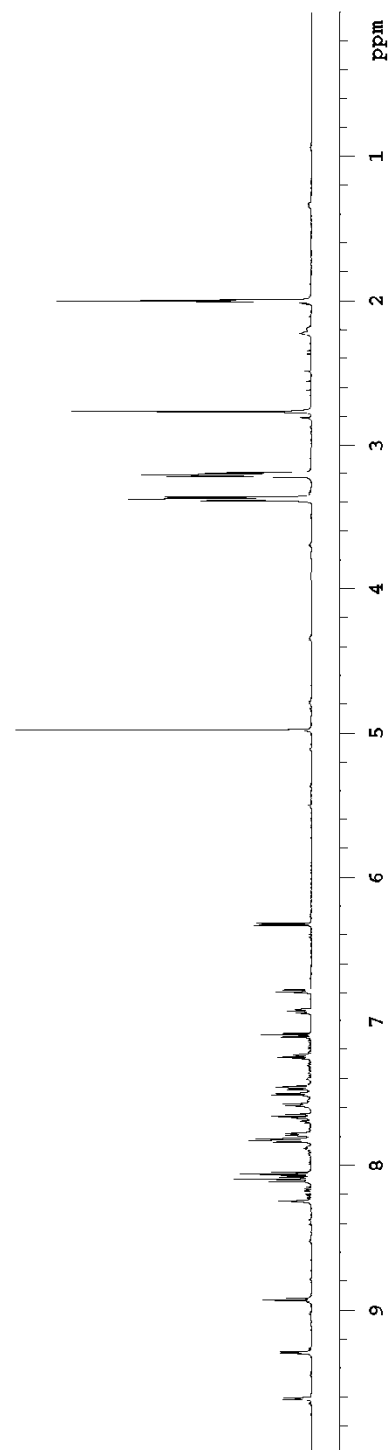

$^1\text{H}$  NMR ( $\text{CDCl}_3$ , 23 °C) of 7f

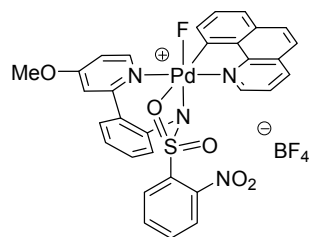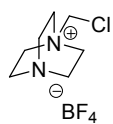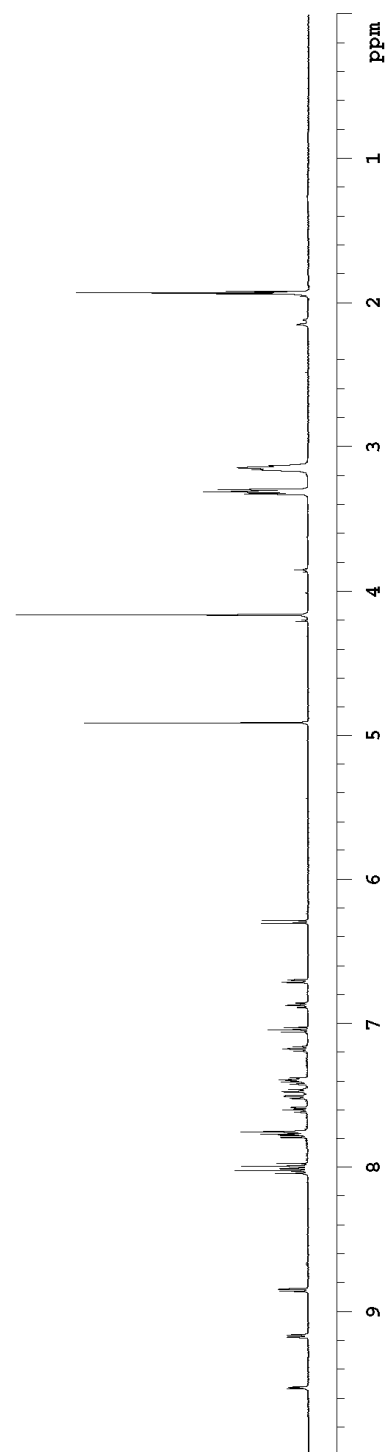

$^1\text{H}$  NMR ( $\text{CDCl}_3$ , 23 °C) of S38

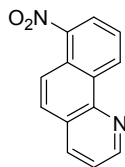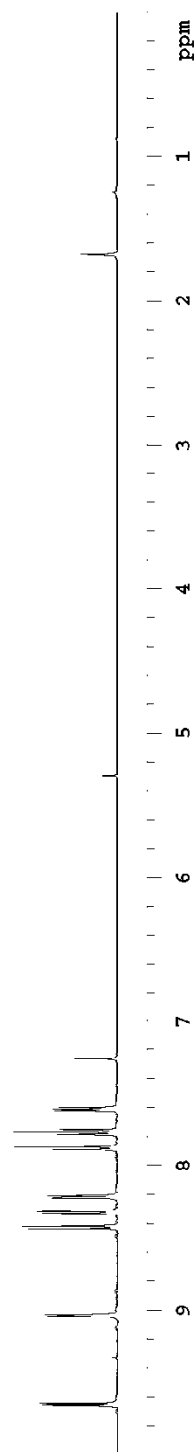

$^{13}\text{C}$  NMR ( $\text{CDCl}_3$ , 23 °C) of S38

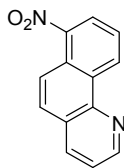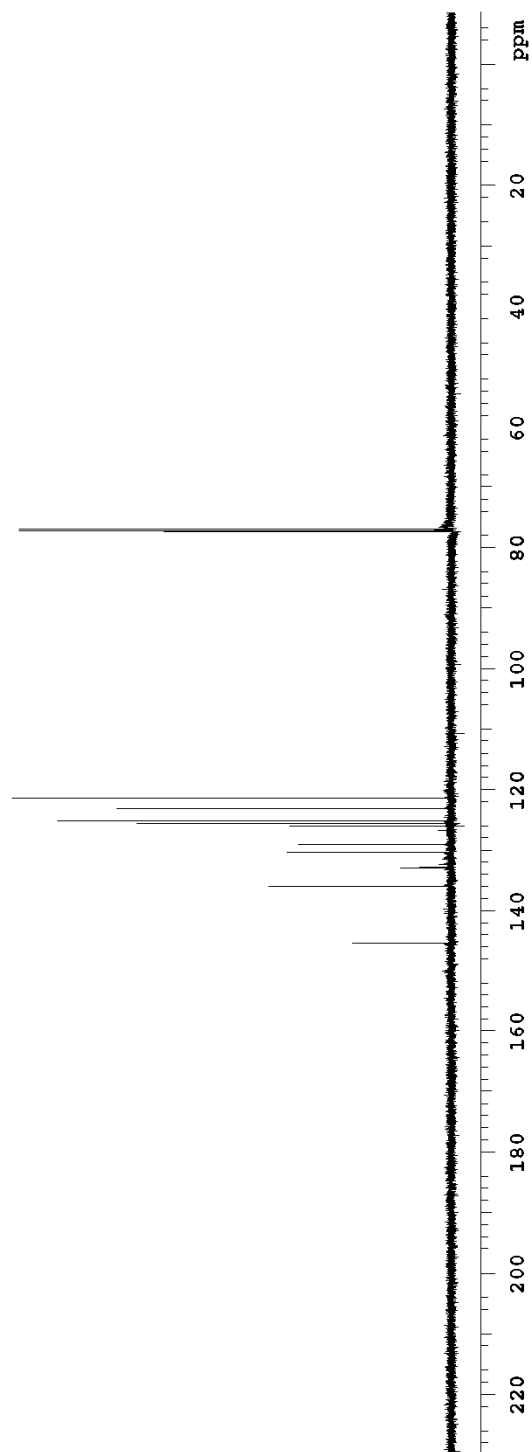



$^1\text{H}$  NMR ( $\text{CDCl}_3$ , 23 °C) of S39

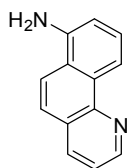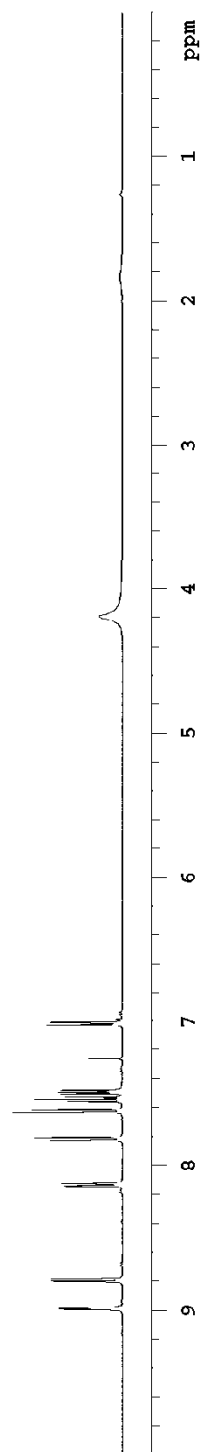

$^{13}\text{C}$  NMR ( $\text{CDCl}_3$ , 23 °C) of S39

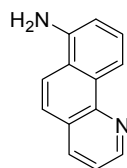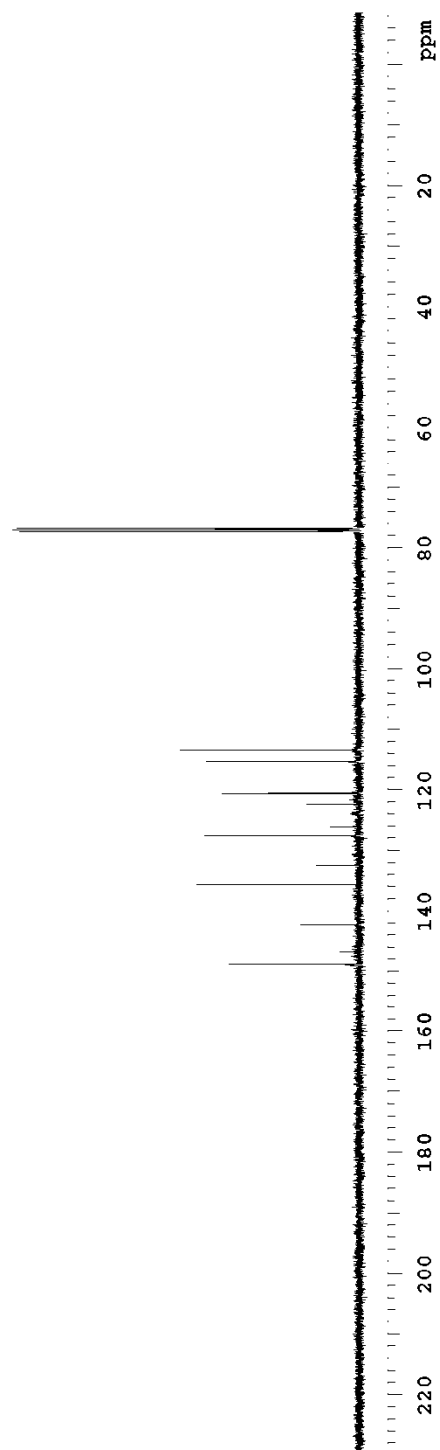

$^1\text{H}$  NMR ( $\text{CDCl}_3$ , 23  $^\circ\text{C}$ ) of S40

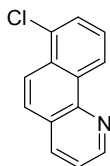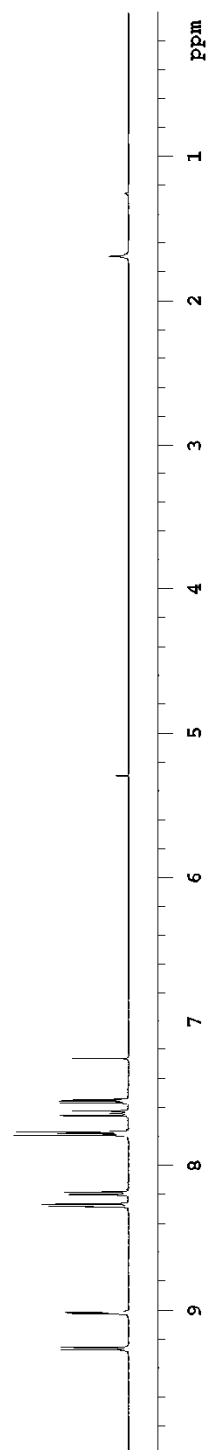

$^{13}\text{C}$  NMR ( $\text{CDCl}_3$ , 23 °C) of S40

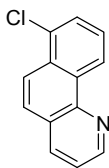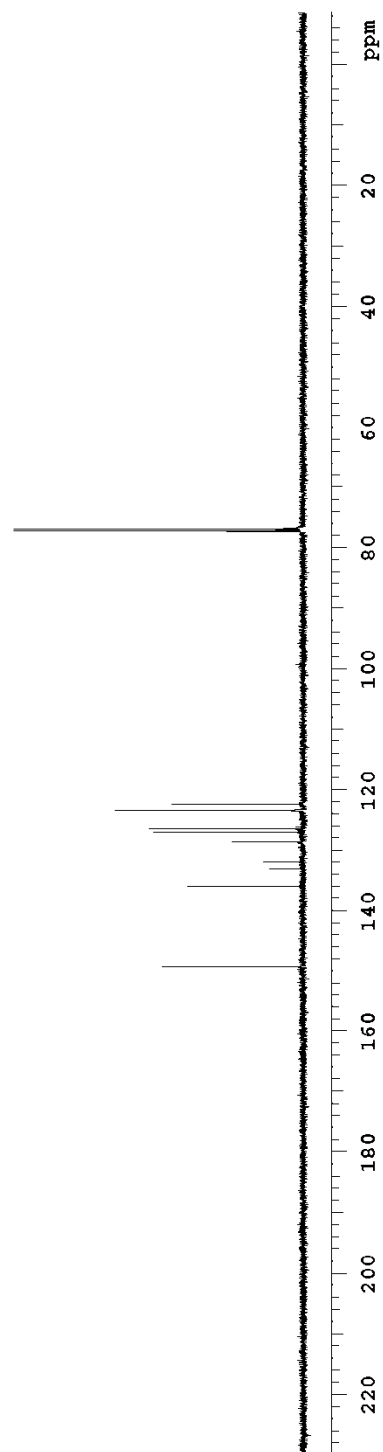

$^1\text{H}$  NMR ( $\text{CDCl}_3$ , 23 °C) of S41

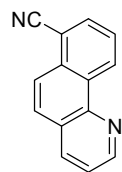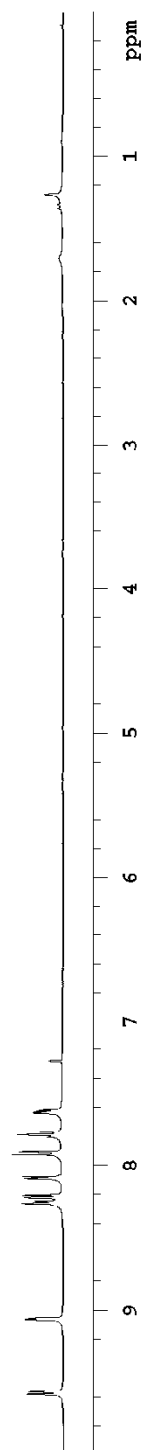

$^{13}\text{C}$  NMR ( $\text{CDCl}_3$ , 23 °C) of S41

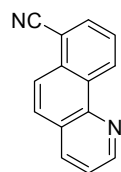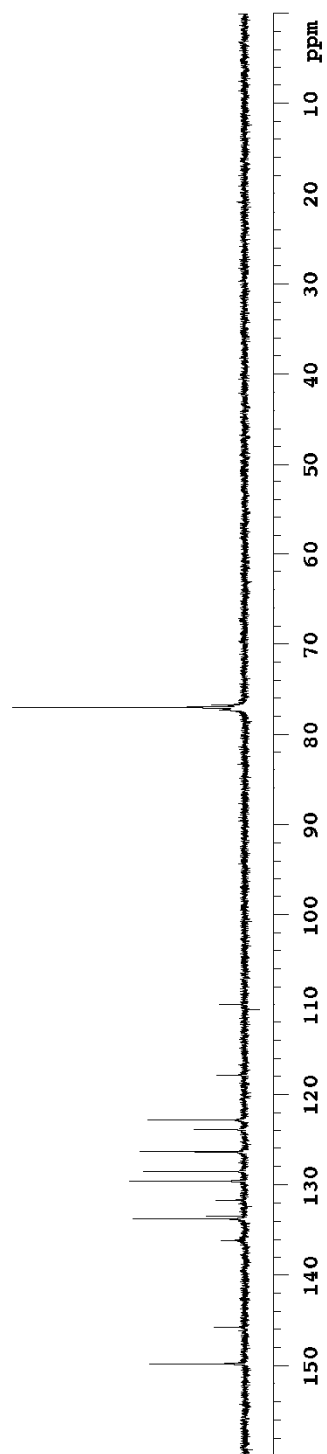

$^1\text{H}$  NMR ( $\text{CDCl}_3$ , 23 °C) of S42

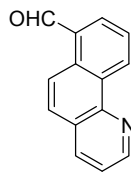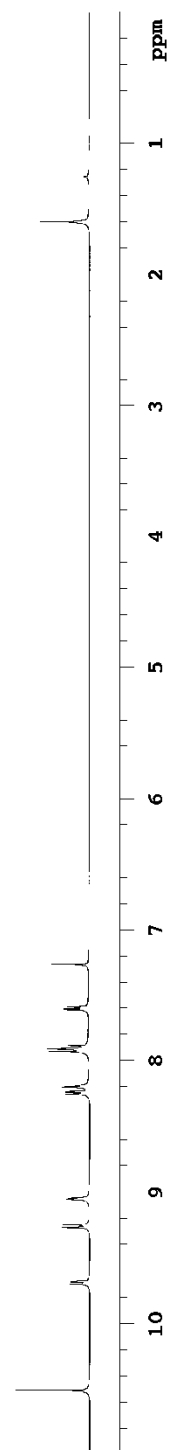

$^{13}\text{C}$  NMR ( $\text{CDCl}_3$ , 23 °C) of S42

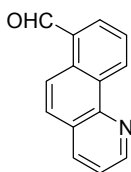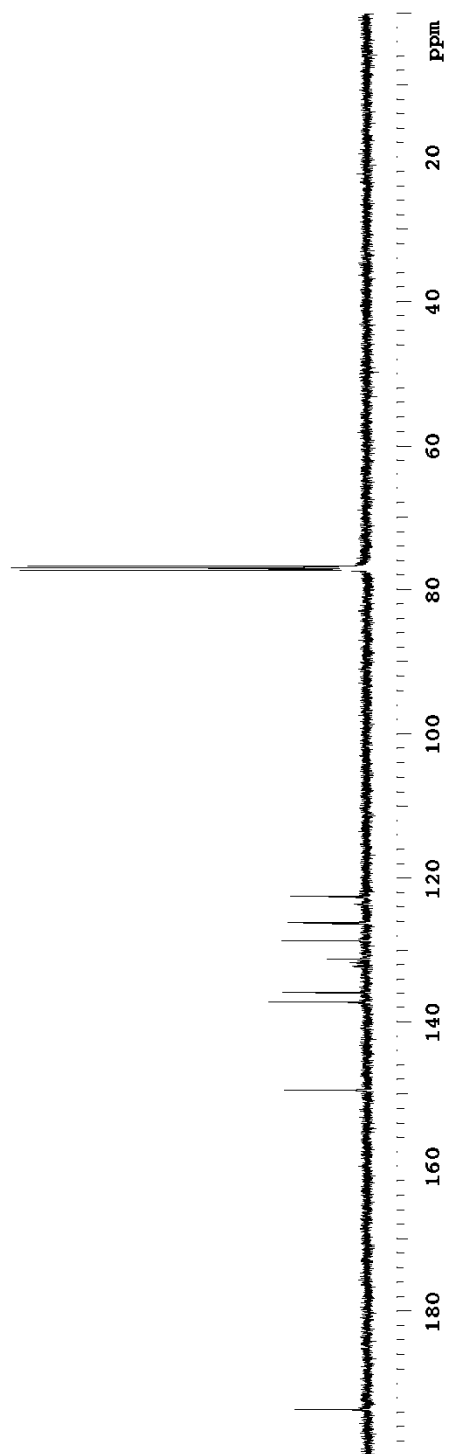



$^1\text{H}$  NMR ( $\text{CDCl}_3$ , 23 °C) of S45

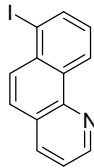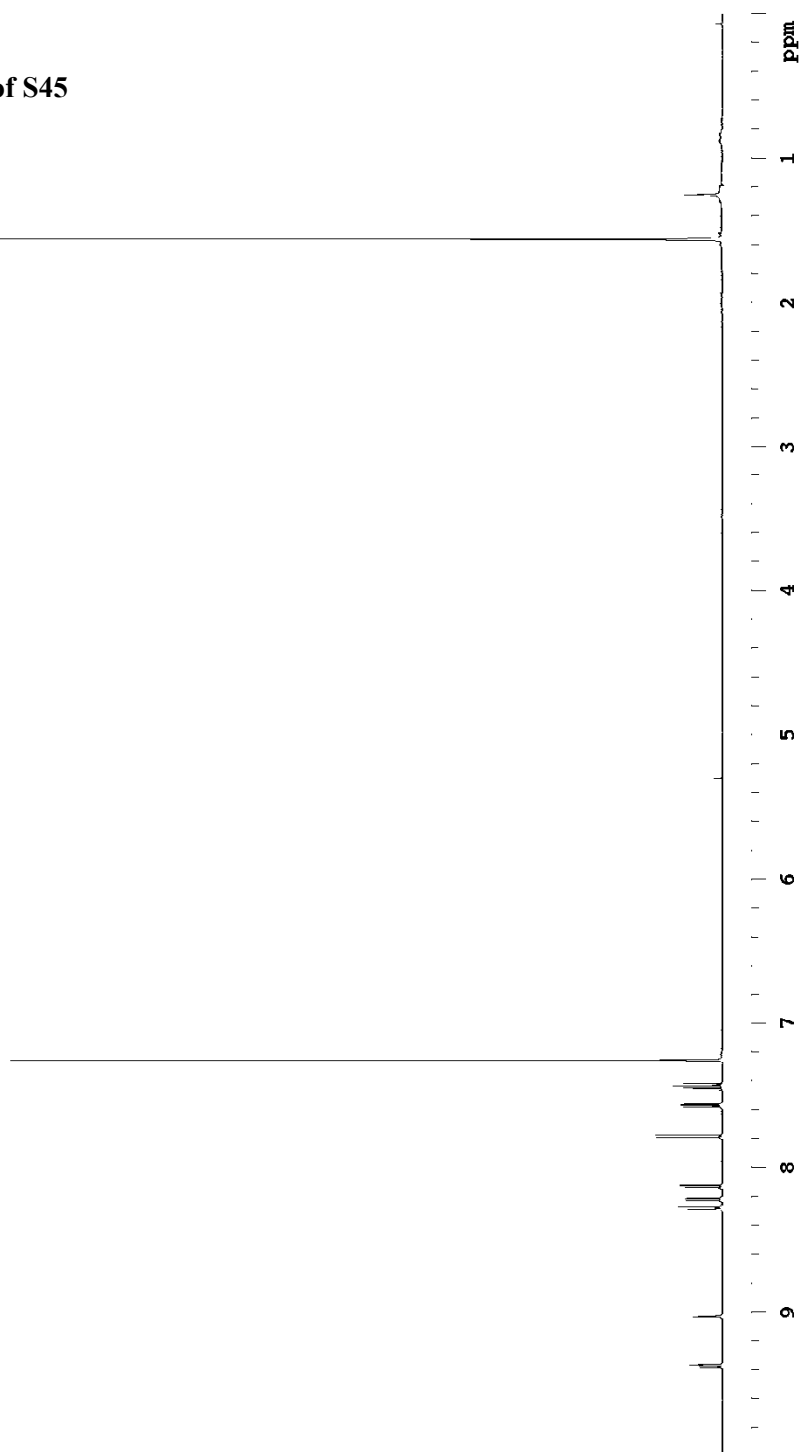

$^{13}\text{C}$  NMR ( $\text{CDCl}_3$ , 23 °C) of S45

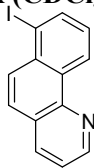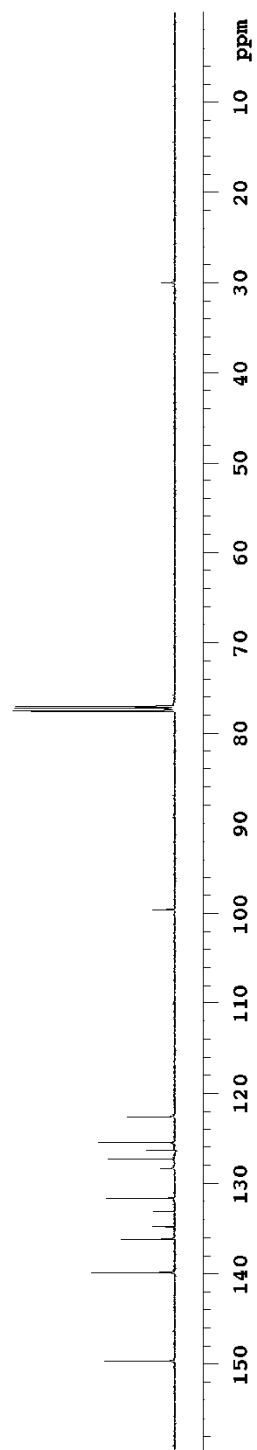

$^1\text{H}$  NMR ( $\text{CDCl}_3$ , 23  $^\circ\text{C}$ ) of S46

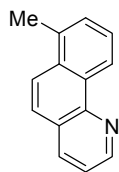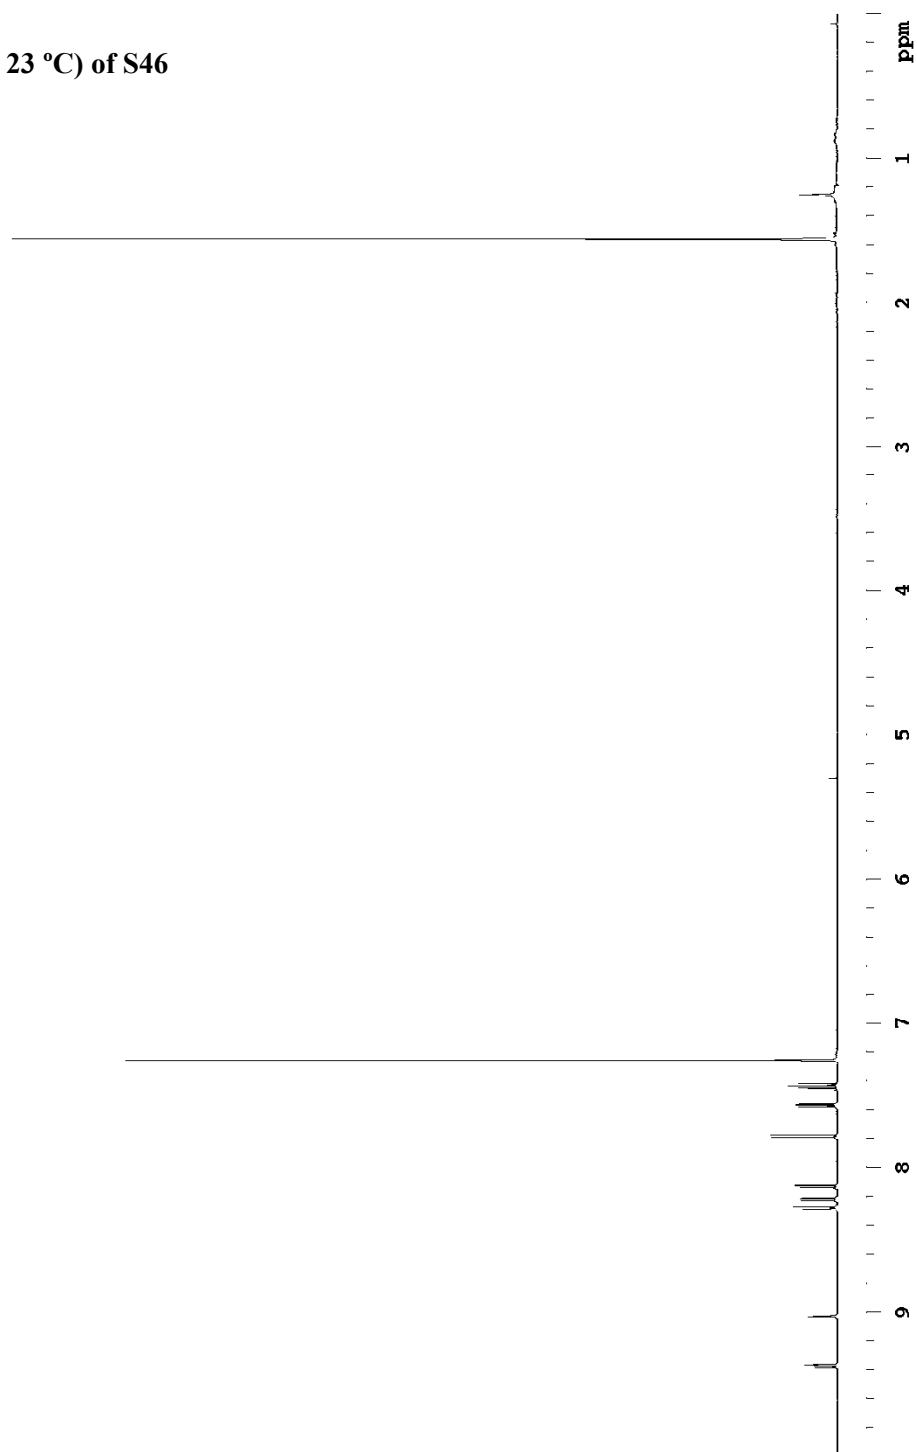

$^{13}\text{C}$  NMR ( $\text{CDCl}_3$ , 23 °C) of

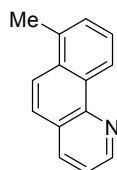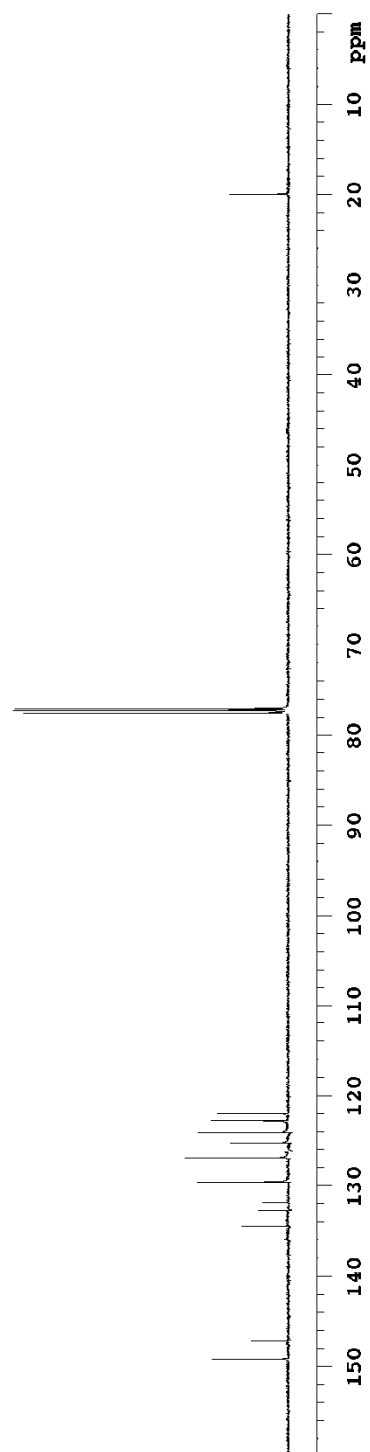

$^1\text{H NMR}$  ( $\text{CDCl}_3$ , 23 °C) of S47

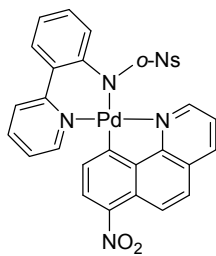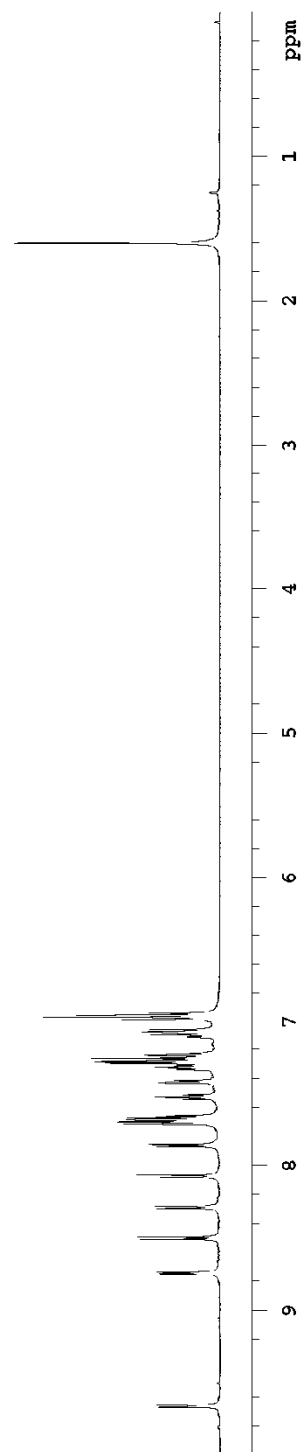

$^{13}\text{C}$  NMR ( $\text{CDCl}_3$ , 23 °C) of S47

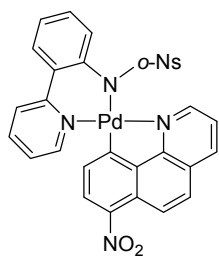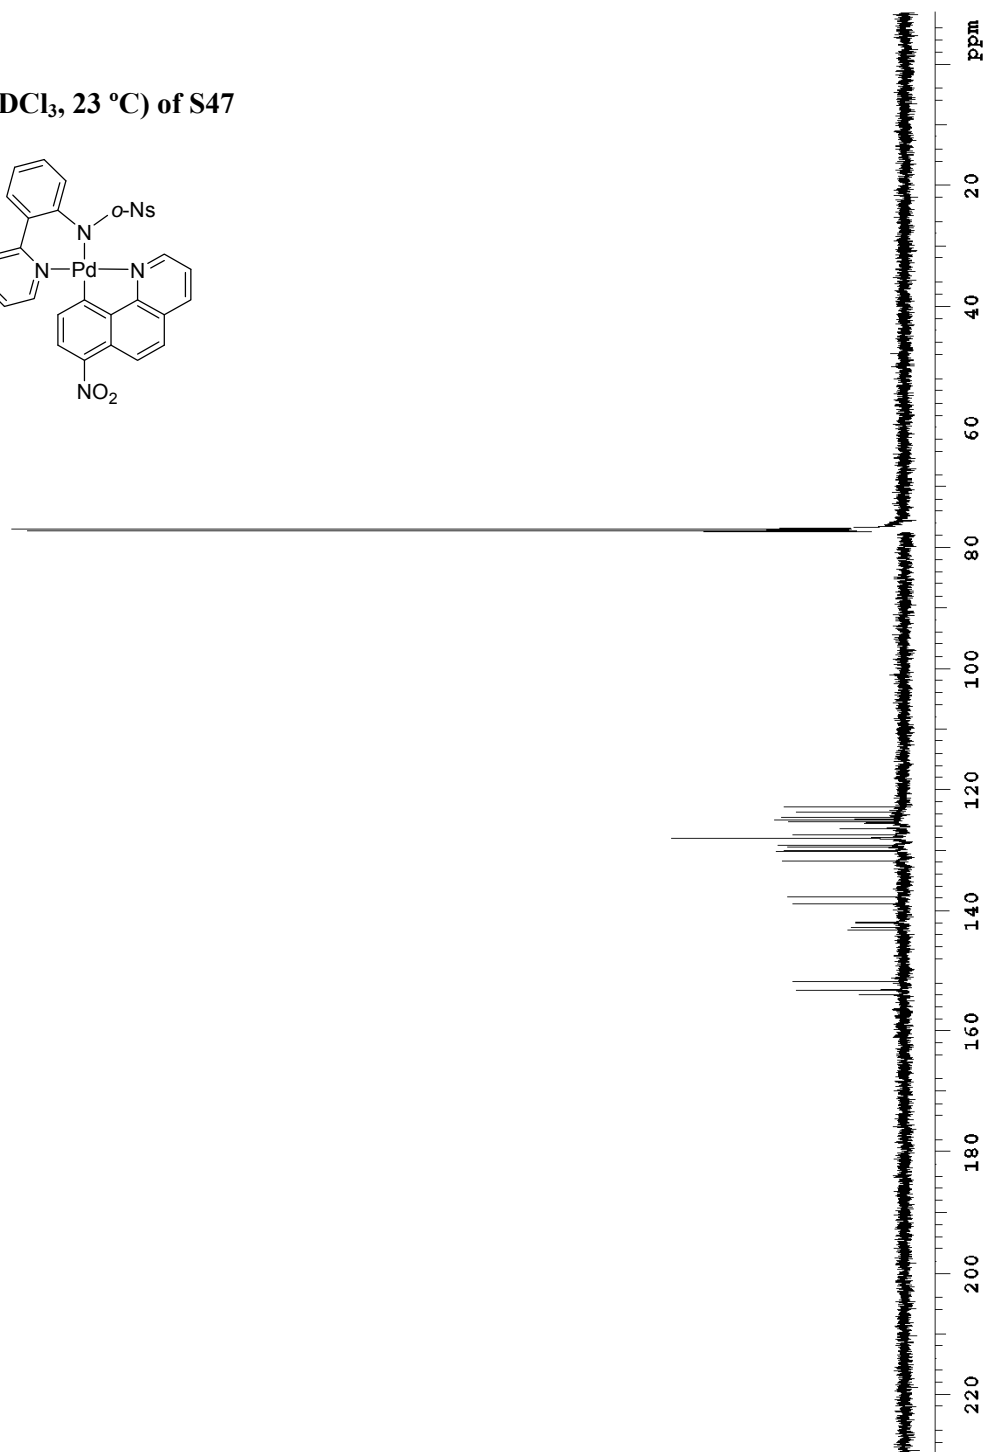

$^{13}\text{C}$  NMR ( $\text{CDCl}_3$ , 23 °C) of S48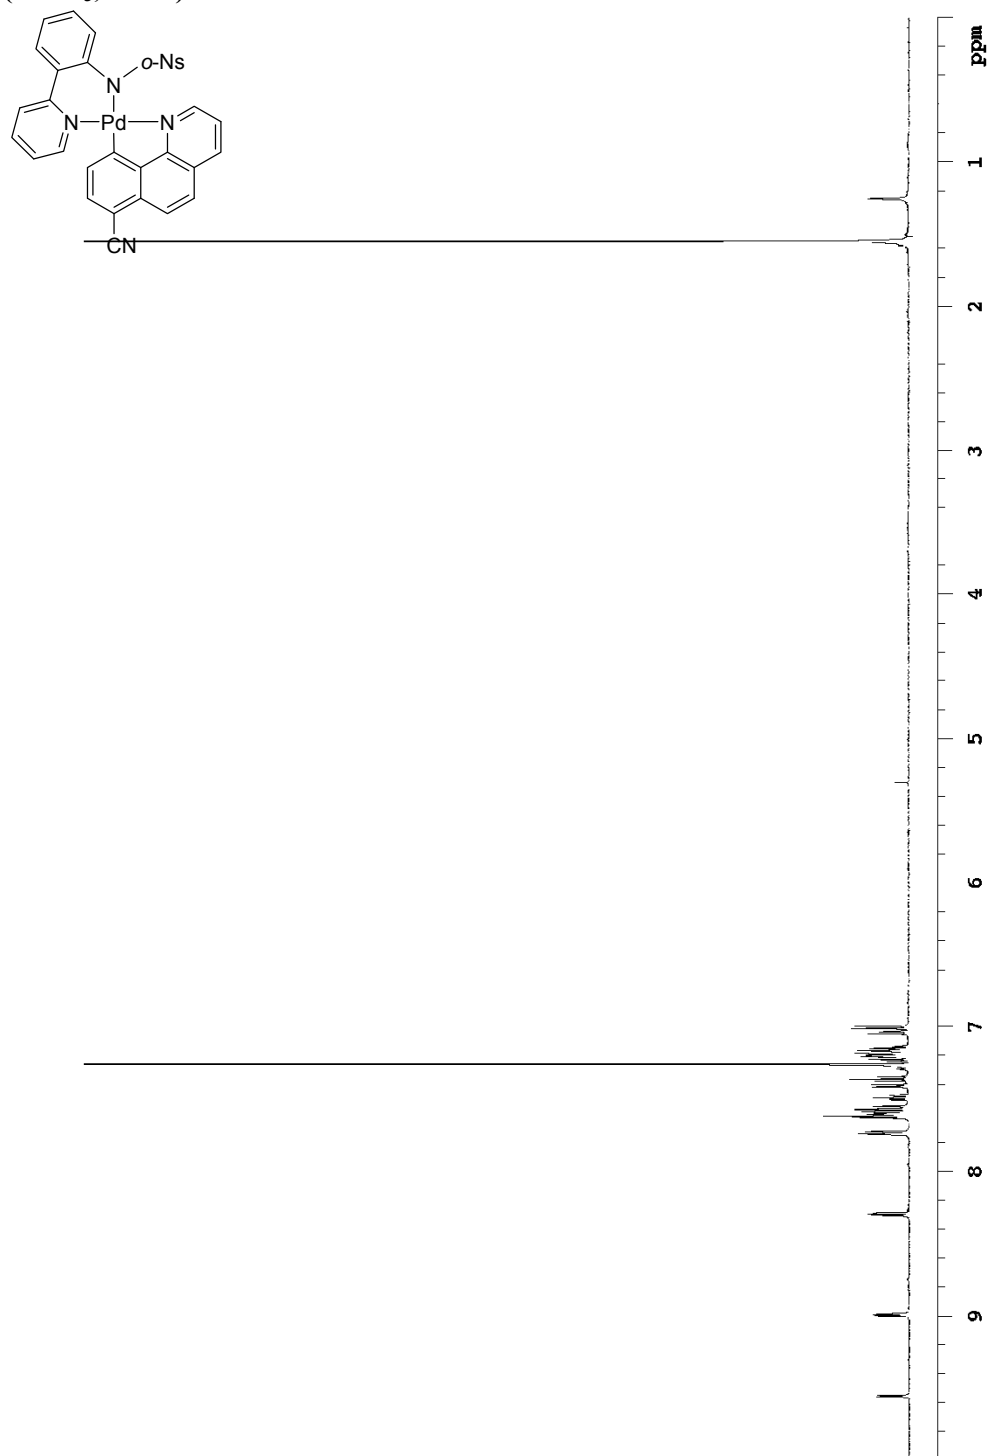

$^1\text{H}$  NMR ( $\text{CDCl}_3$ , 23 °C) of S49

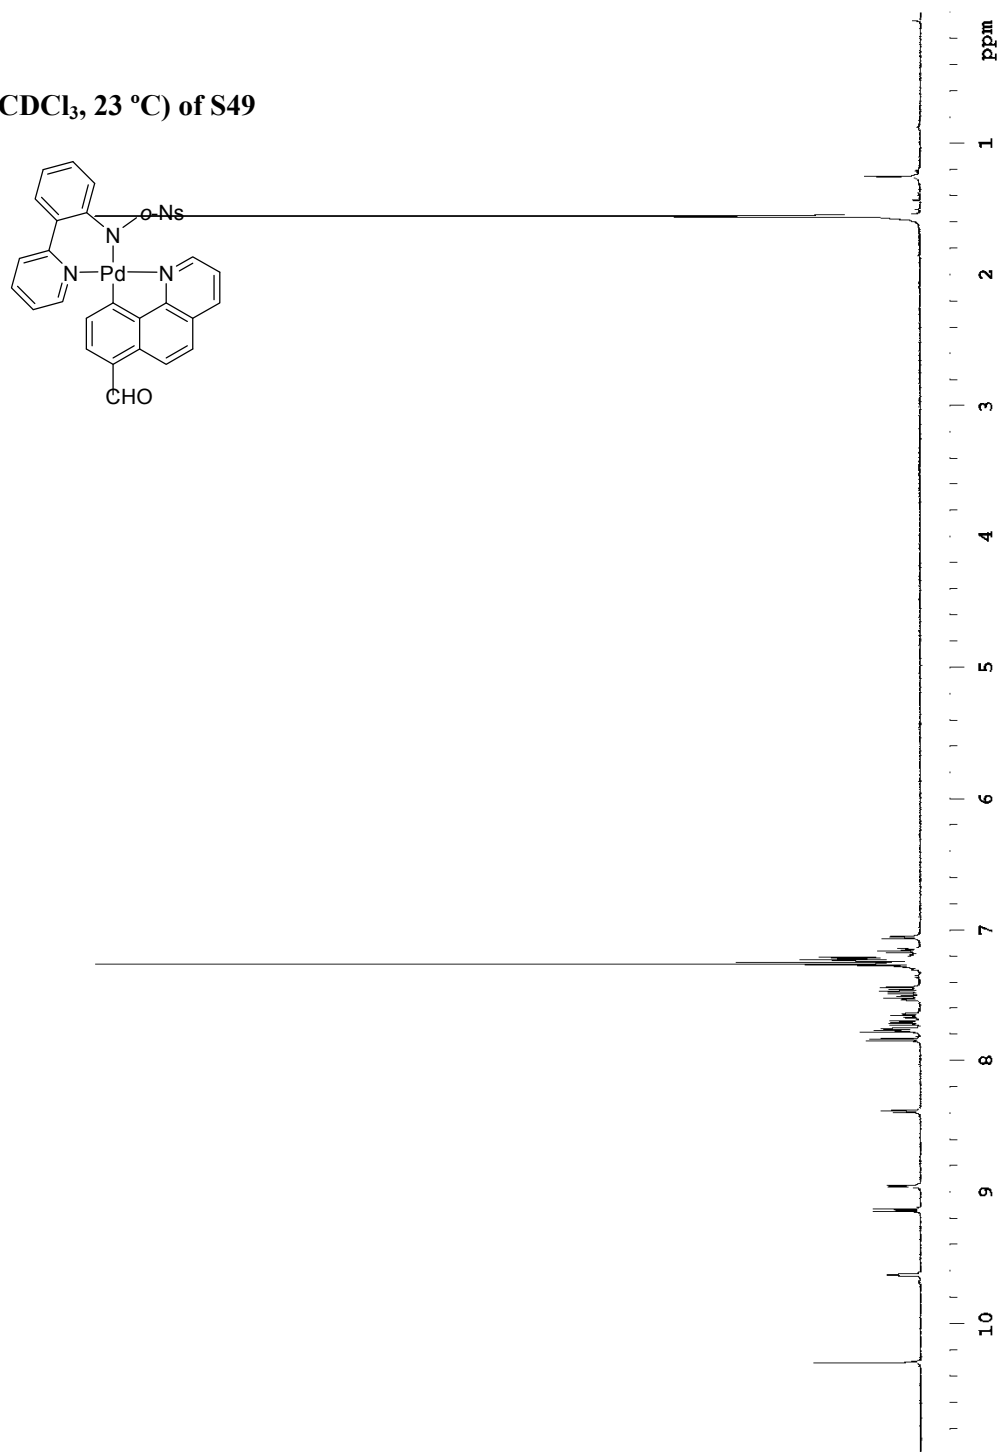



$^1\text{H}$  NMR ( $\text{CDCl}_3$ , 23 °C) of S50

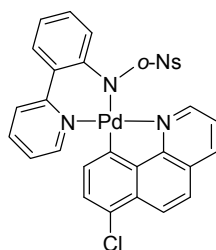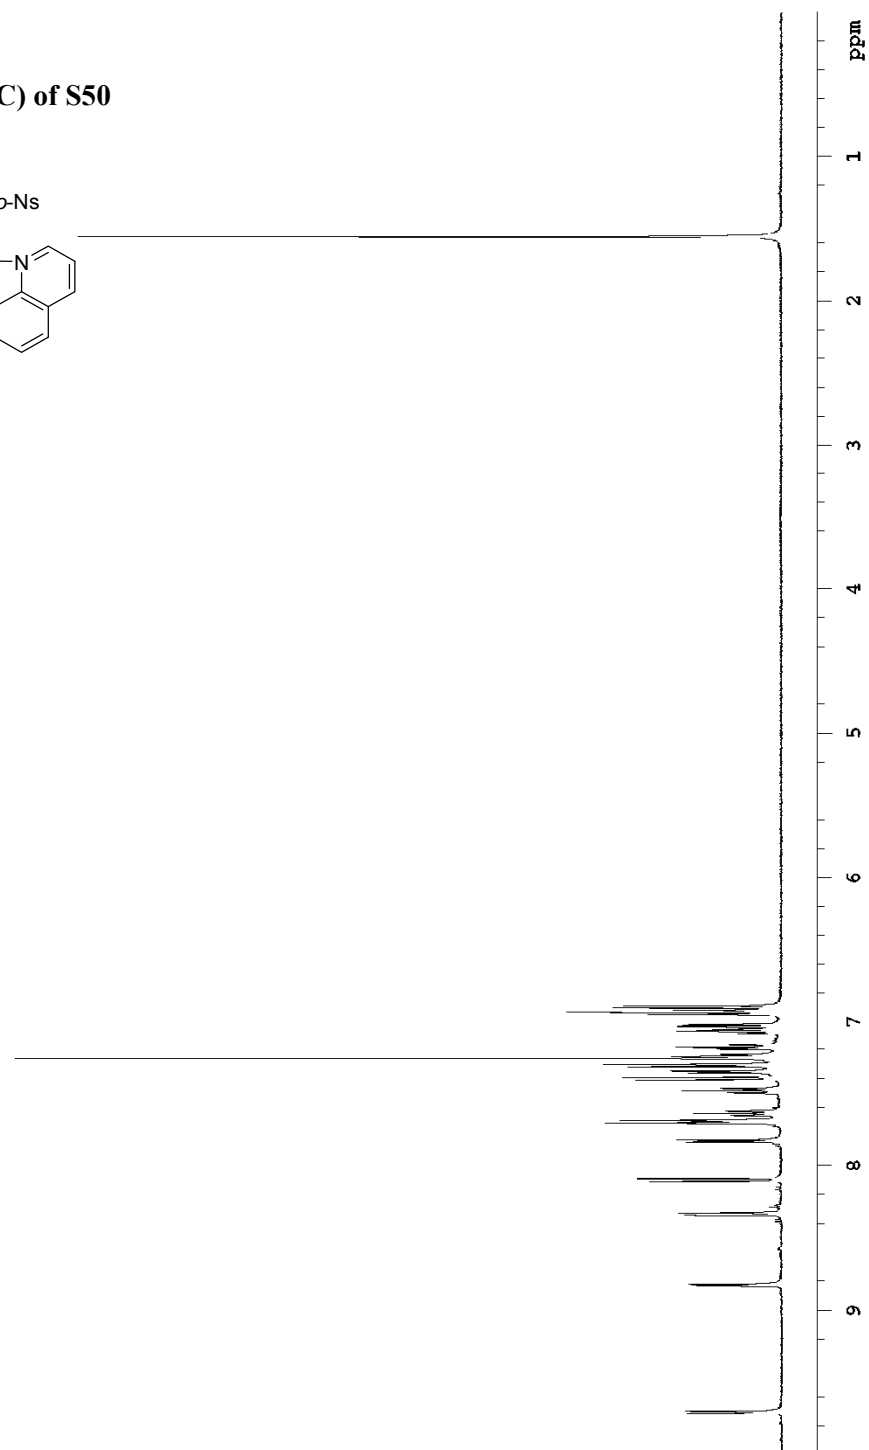

$^{13}\text{C}$  NMR ( $\text{CDCl}_3$ , 23 °C) of S50

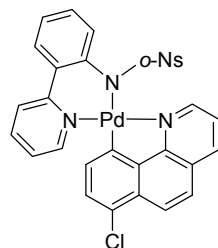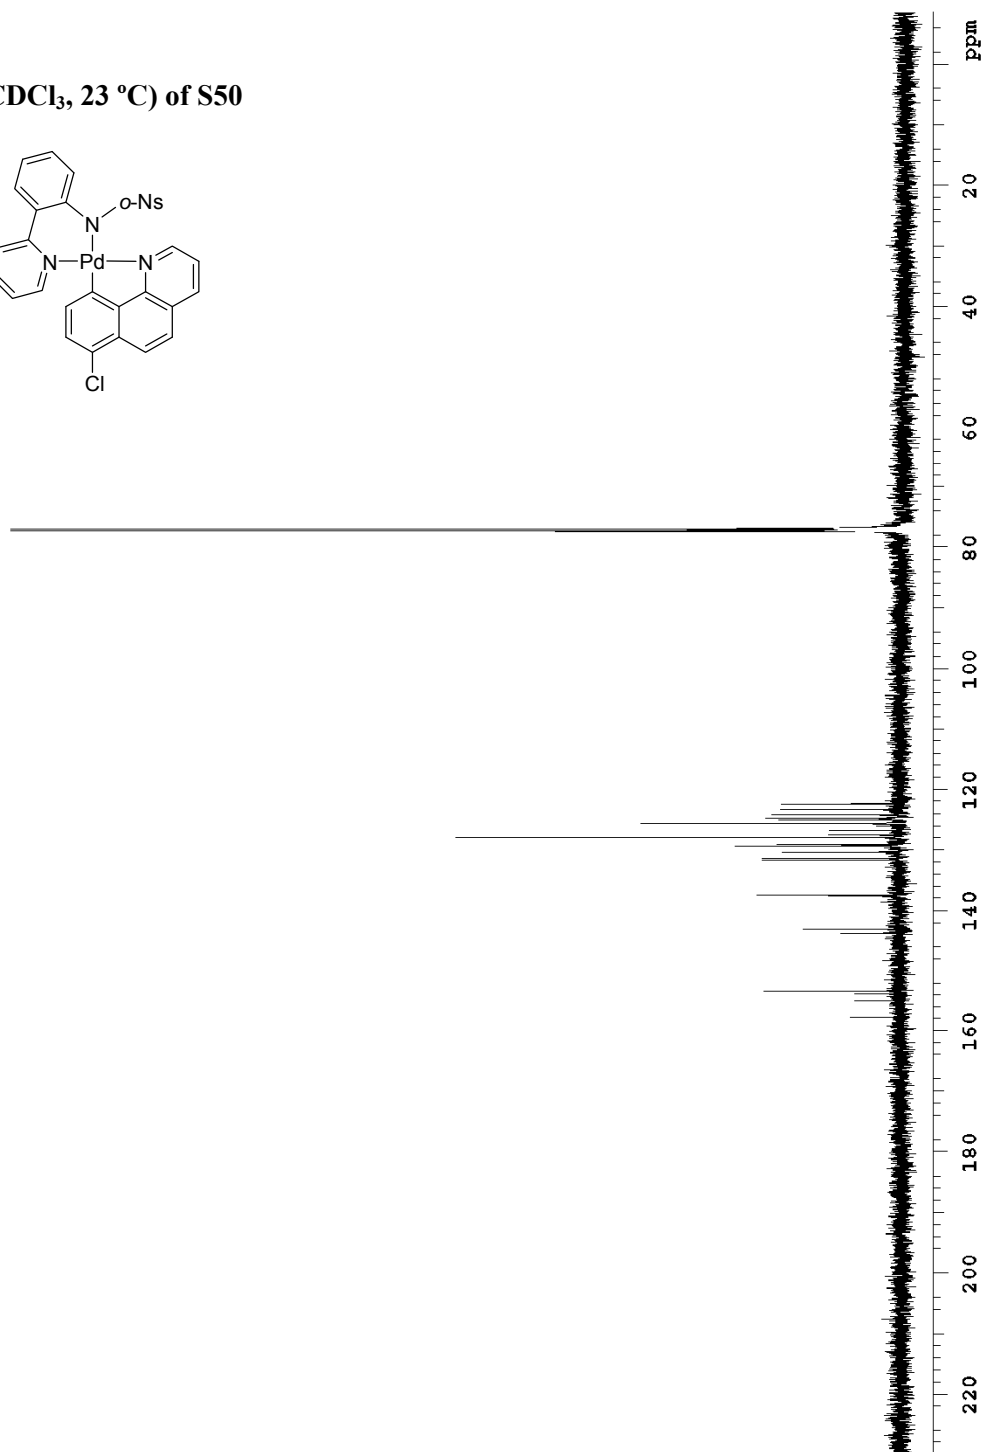

<sup>1</sup>H NMR (CDCl<sub>3</sub>, 23 °C) of S51

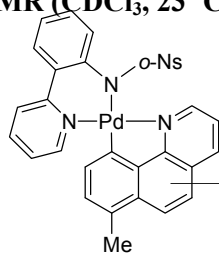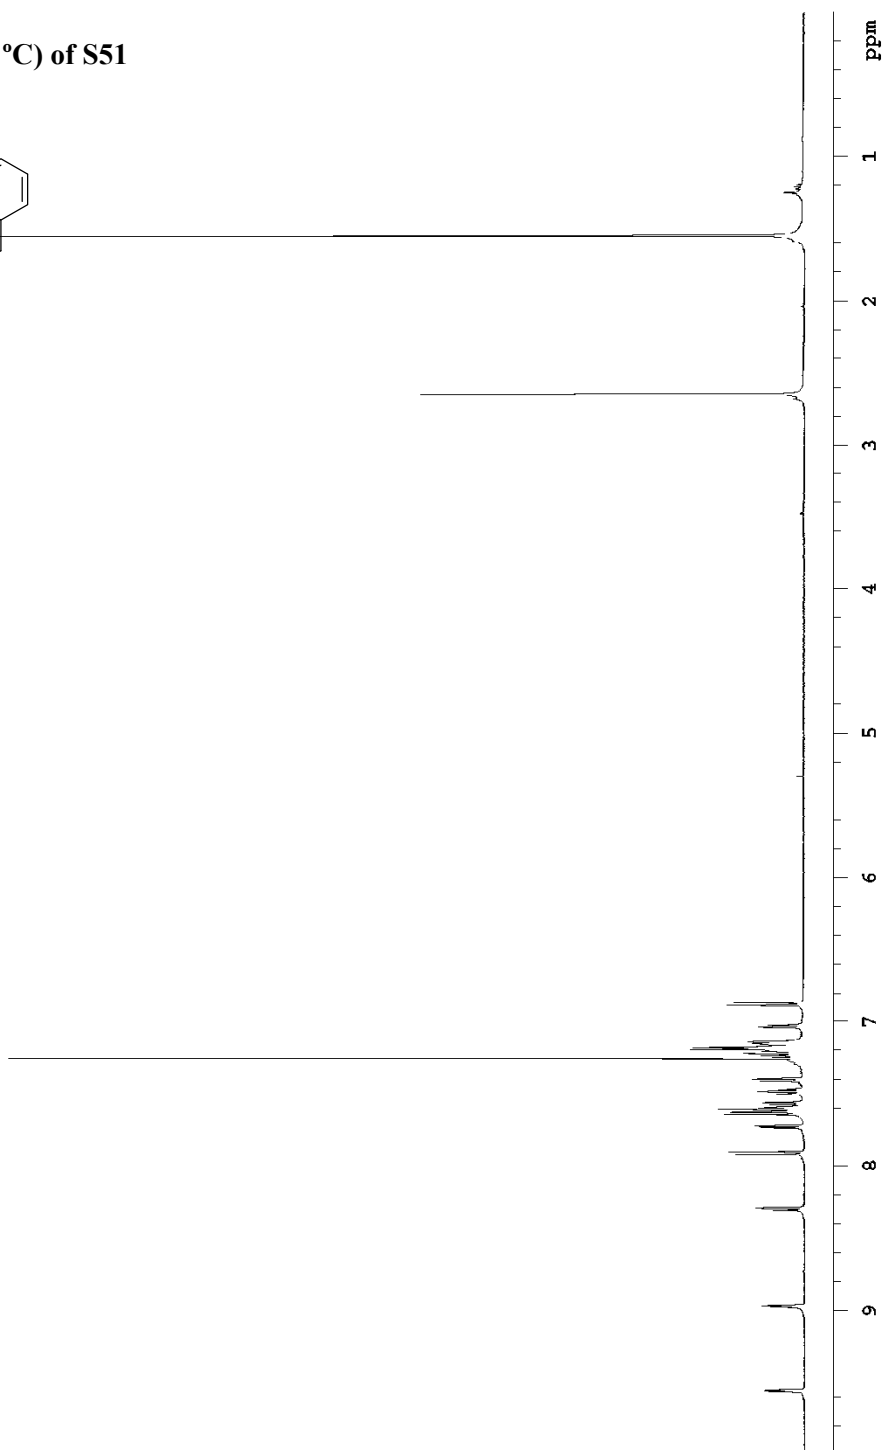

$^1\text{H NMR}$  ( $\text{CDCl}_3$ ,  $23^\circ\text{C}$ ) of S52

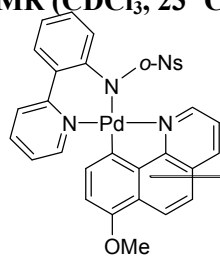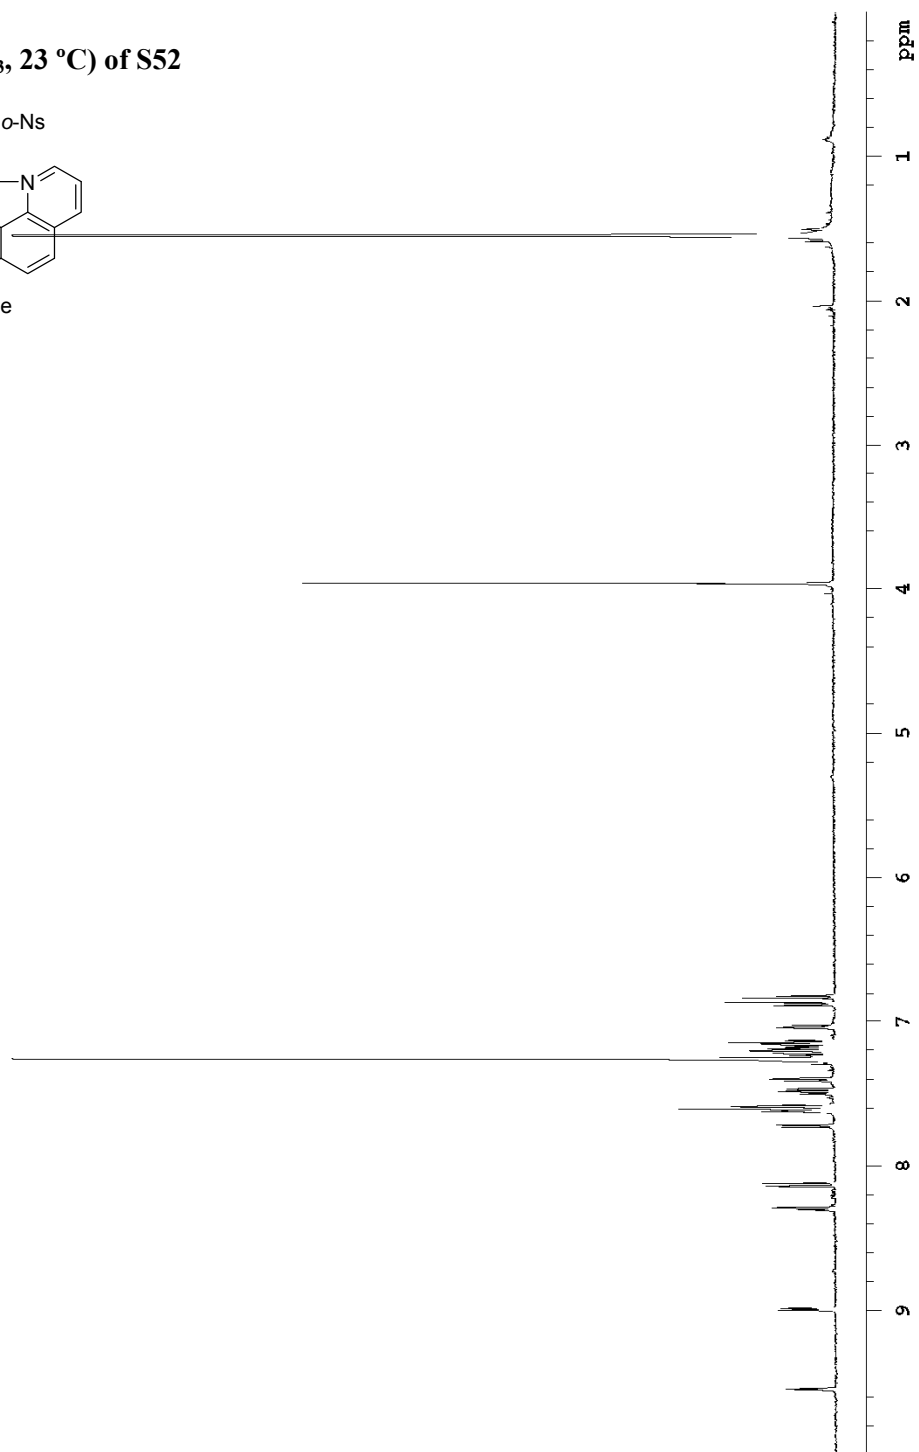

$^1\text{H}$  NMR (acetonitrile- $d_3$ , 23 °C) of 8a

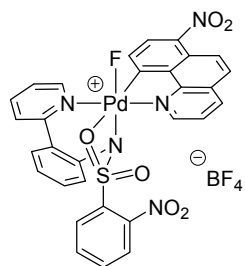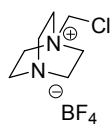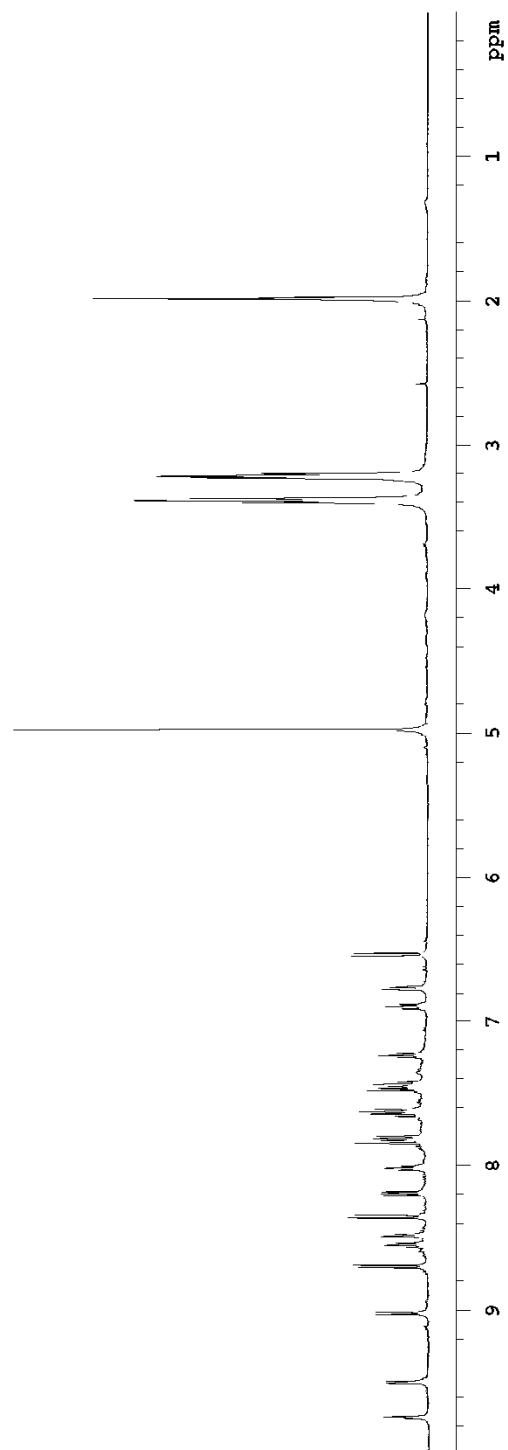

$^1\text{H}$  NMR (acetonitrile- $d_3$ , 23 °C) of 8b

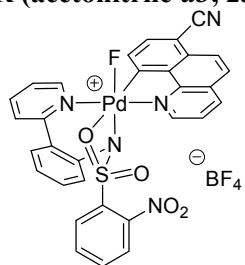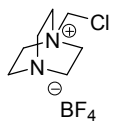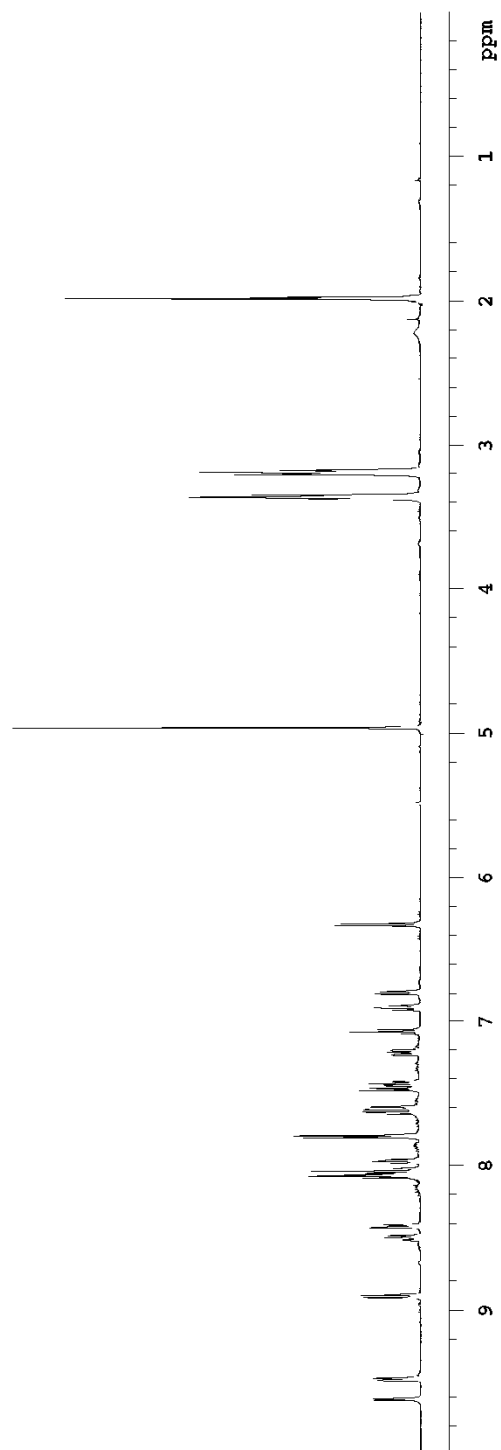

$^1\text{H}$  NMR (acetonitrile- $d_3$ , 23 °C) of **8c**

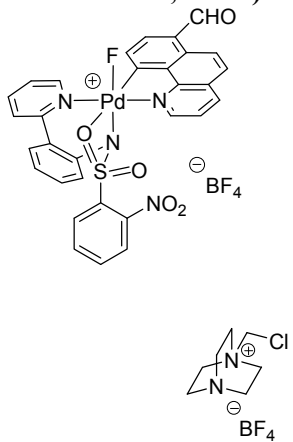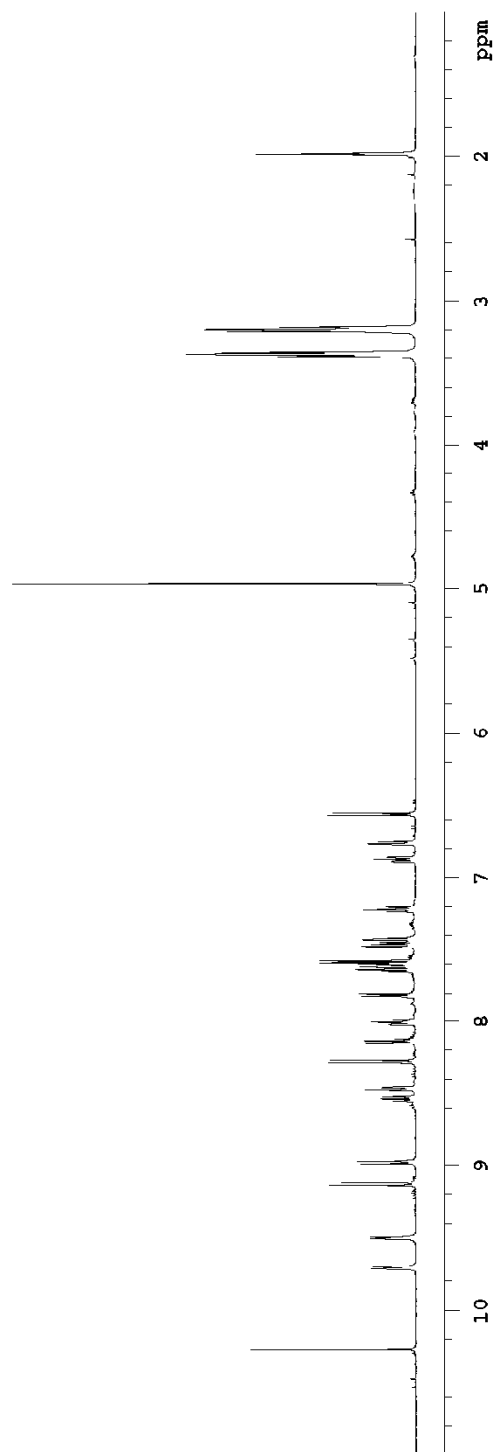

$^1\text{H}$  NMR (acetonitrile- $d_3$ , 23 °C) of 8d

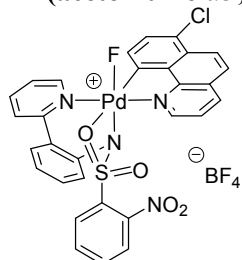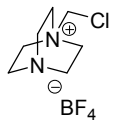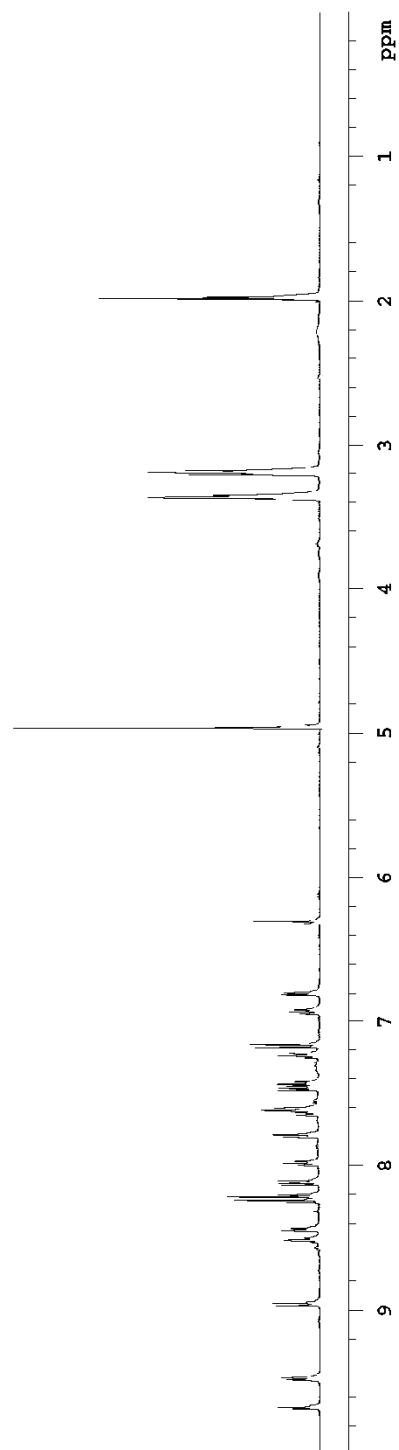



$^1\text{H}$  NMR (acetonitrile- $d_3$ , 23 °C) of 8f

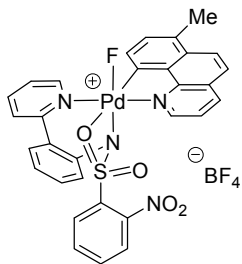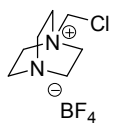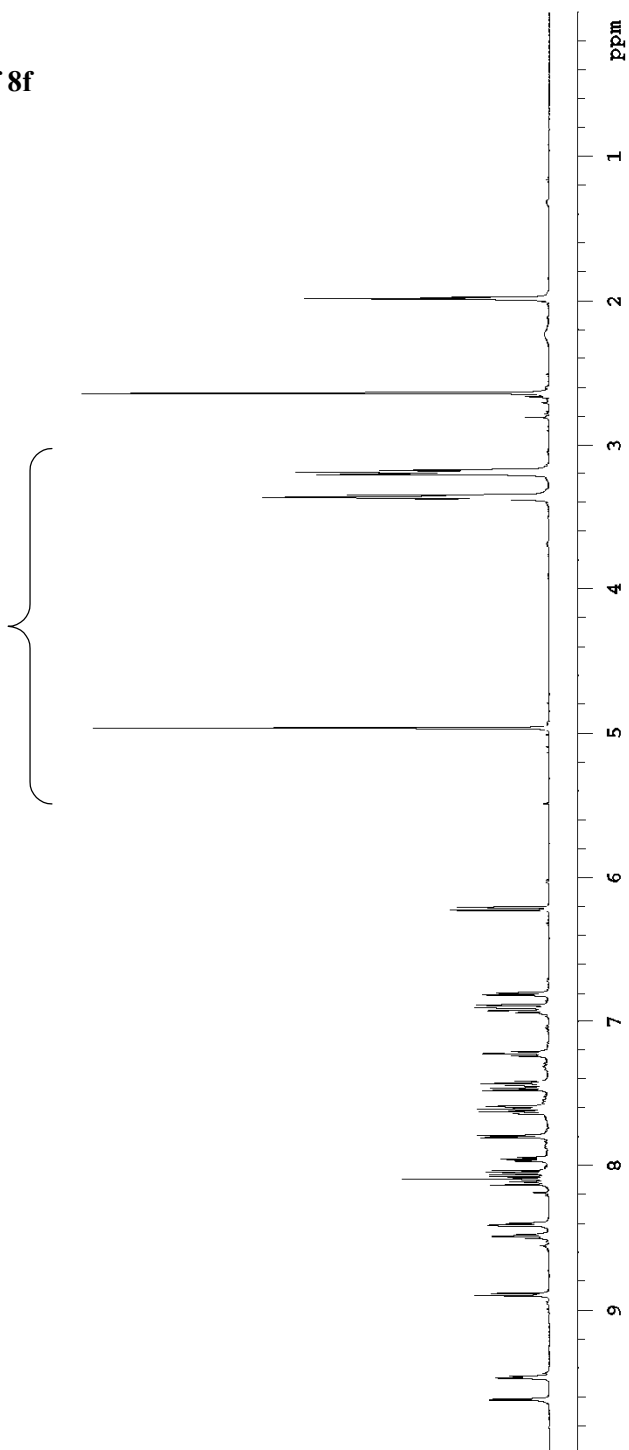

$^1\text{H}$  NMR (acetonitrile- $d_3$ , 23 °C) of 8g

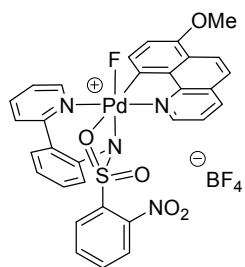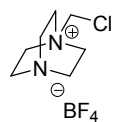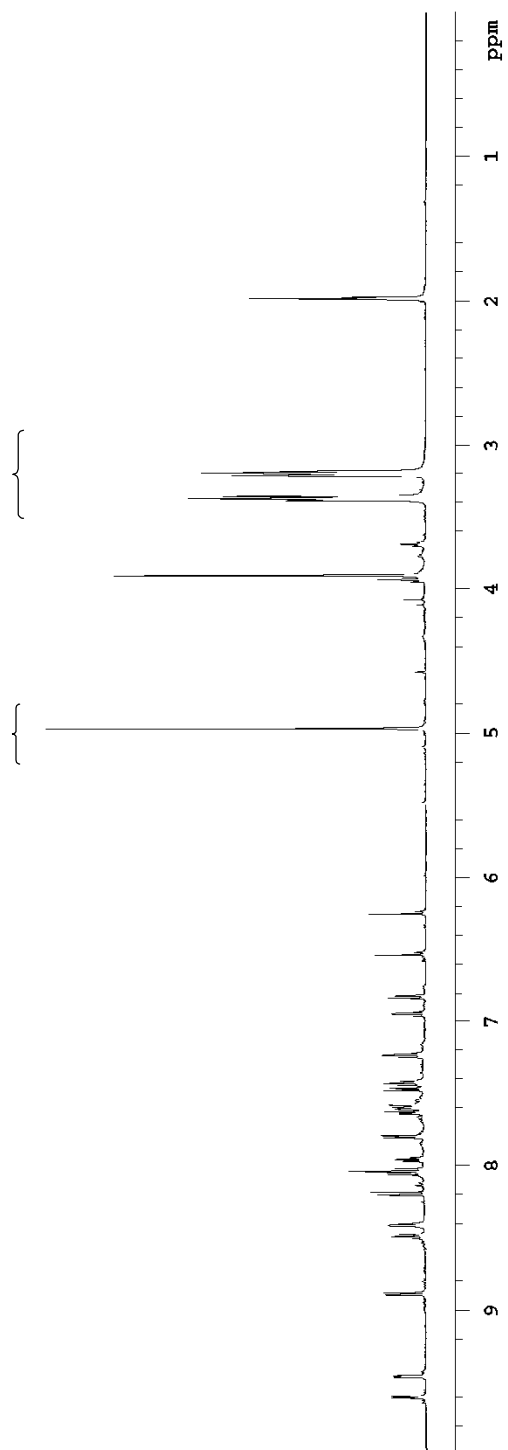

**$^1\text{H}$  NMR (acetonitrile- $d_3$ , 23 °C) of 9a**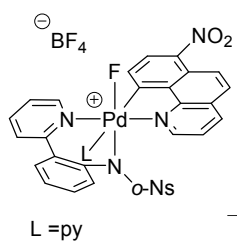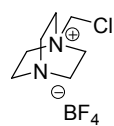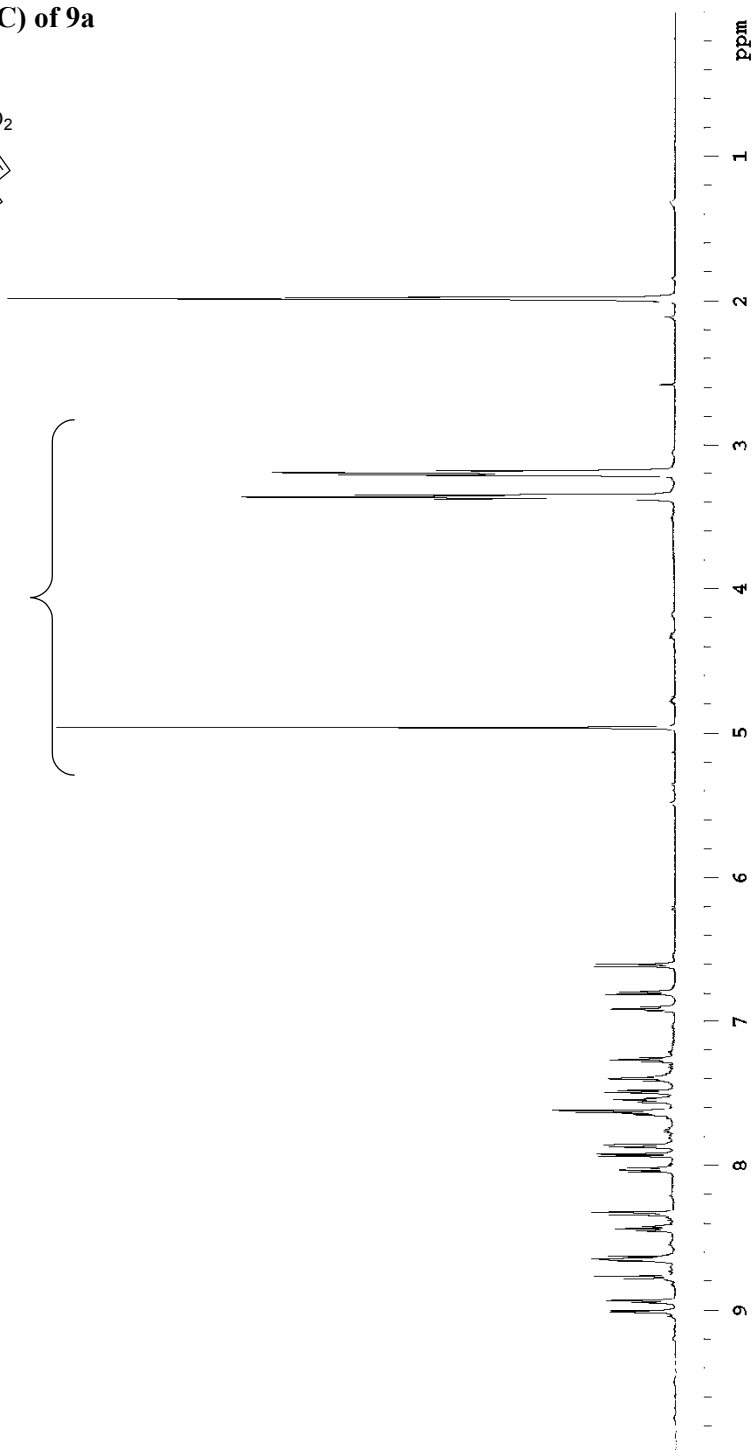

**$^1\text{H}$  NMR (acetonitrile- $d_3$ , 23 °C) of 9b**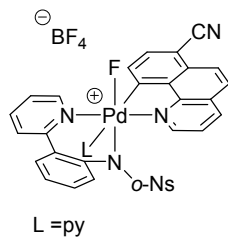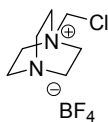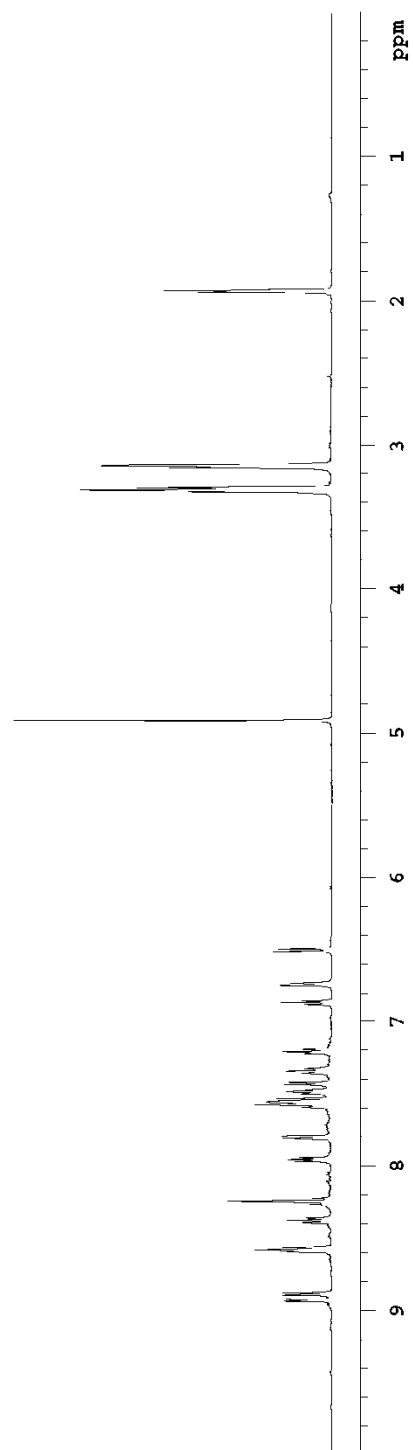

$^1\text{H}$  NMR (acetonitrile- $d_3$ , 23 °C) of 9c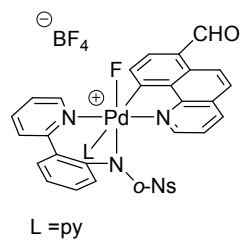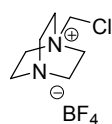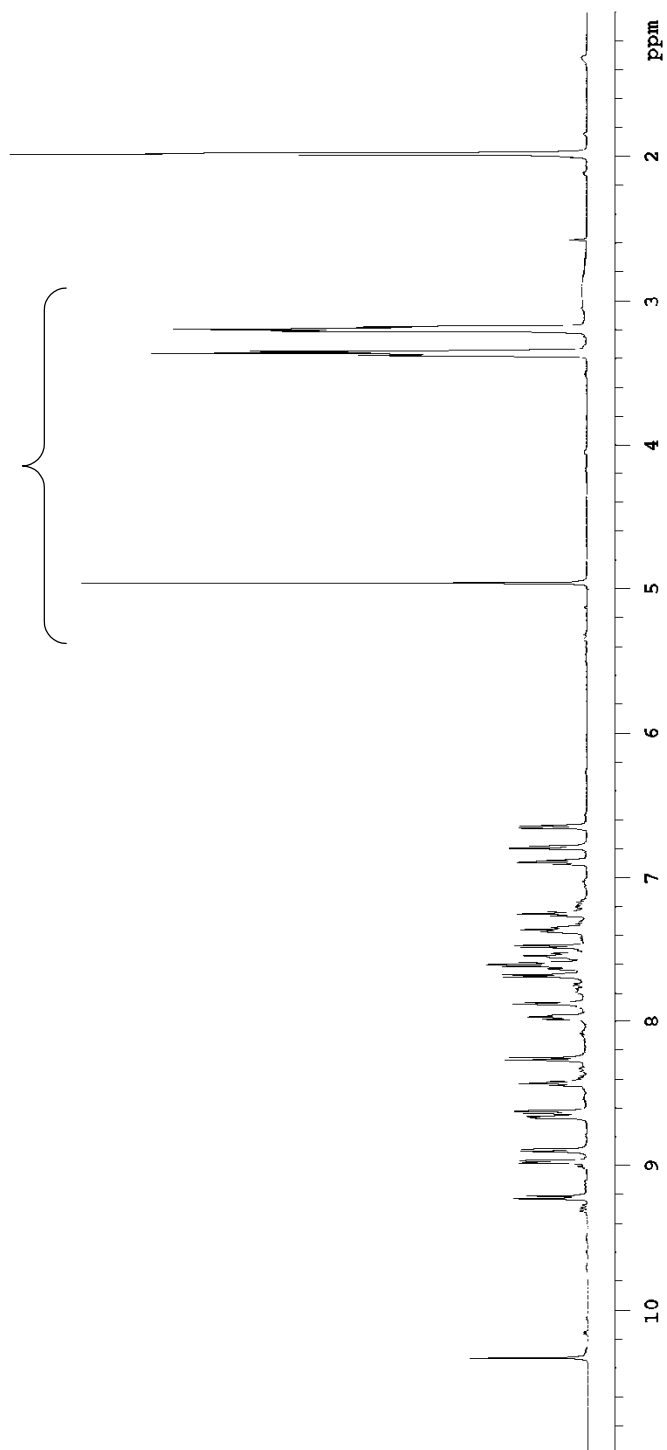

**$^1\text{H}$  NMR (acetonitrile- $d_3$ , 23 °C) of 9d**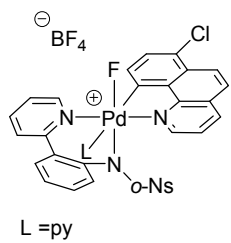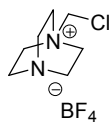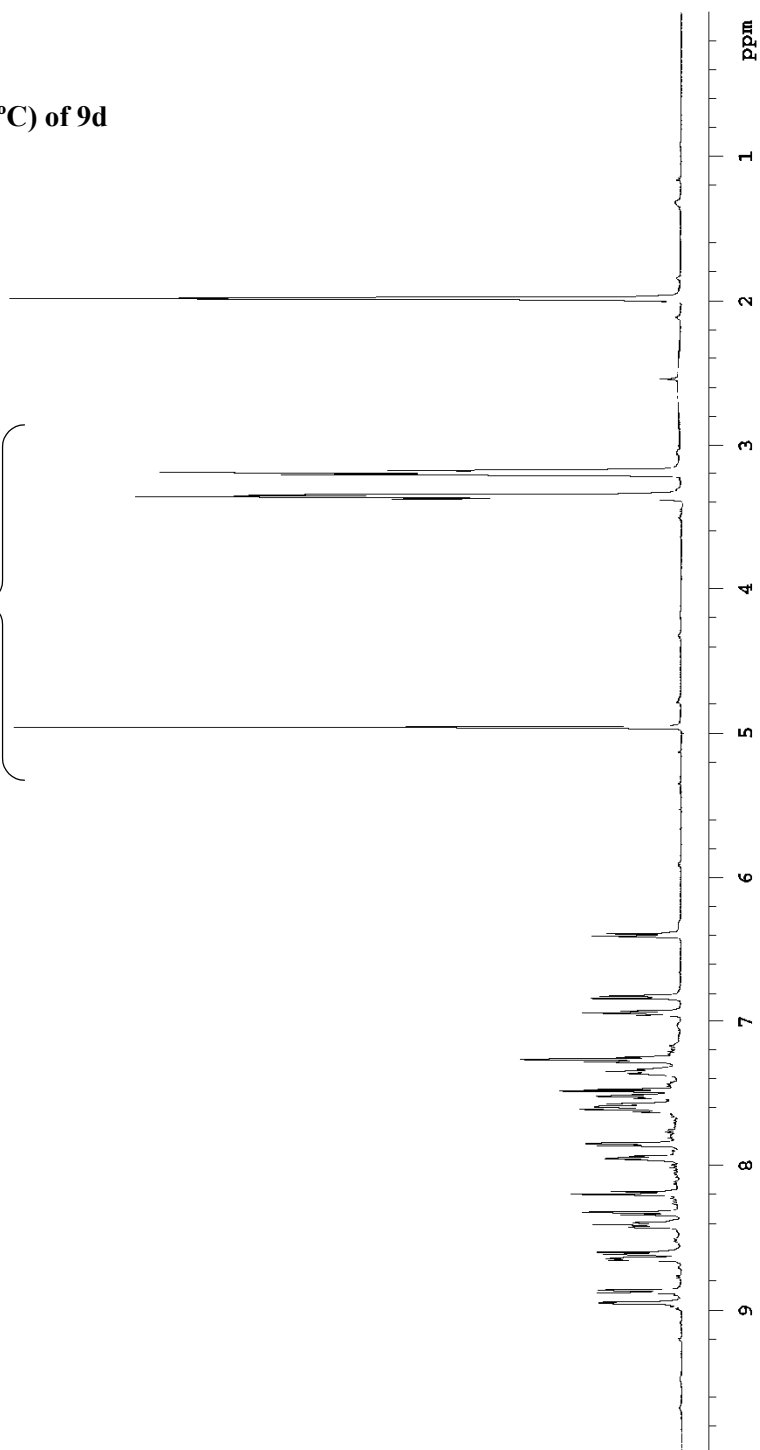

$^1\text{H}$  NMR (acetonitrile- $d_3$ , 23 °C) of 9f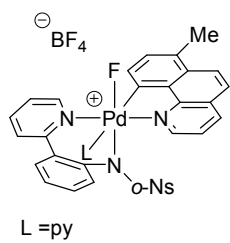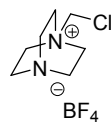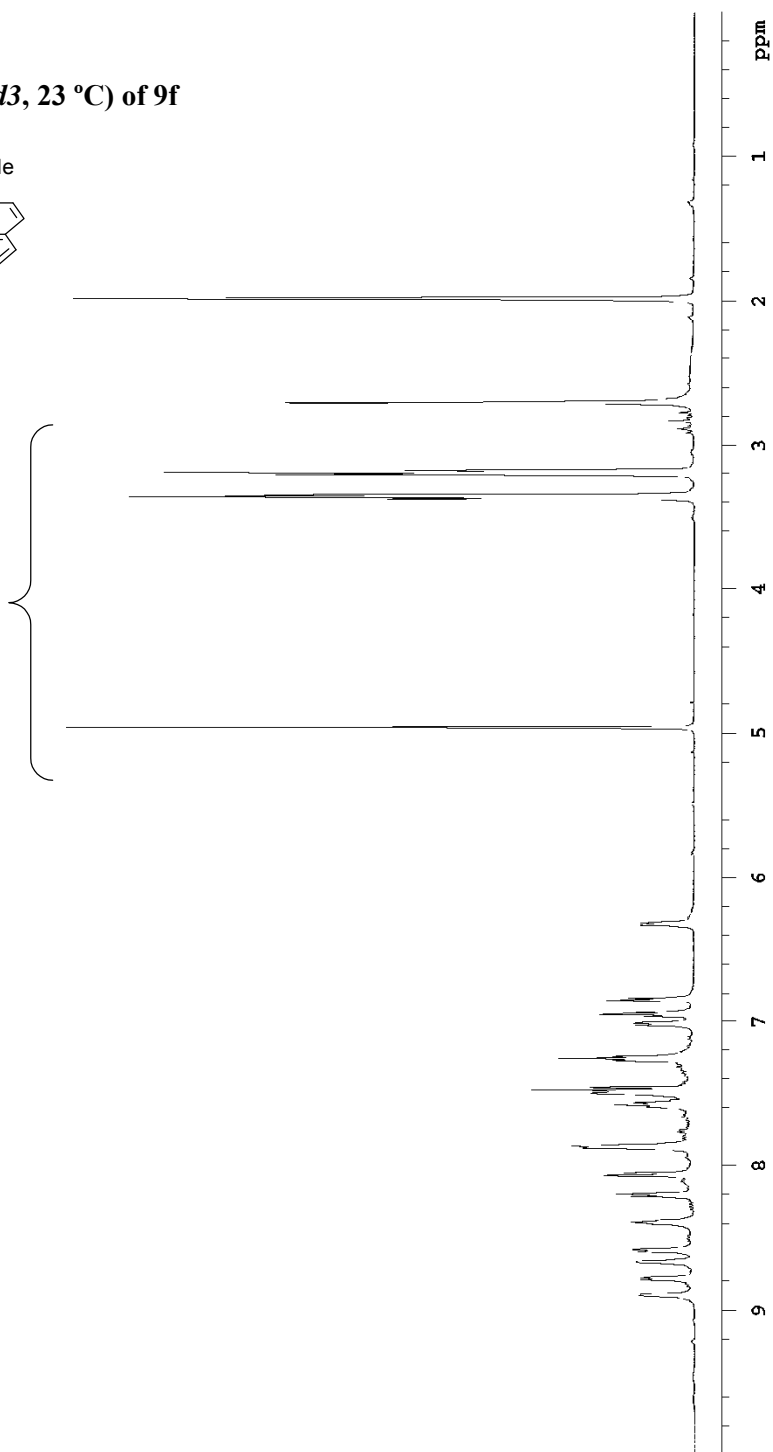

$^1\text{H}$  NMR (acetonitrile- $d_3$ , 23 °C) of 9g

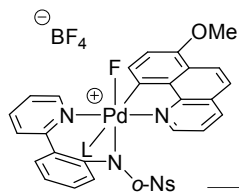

L = py

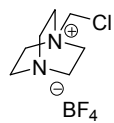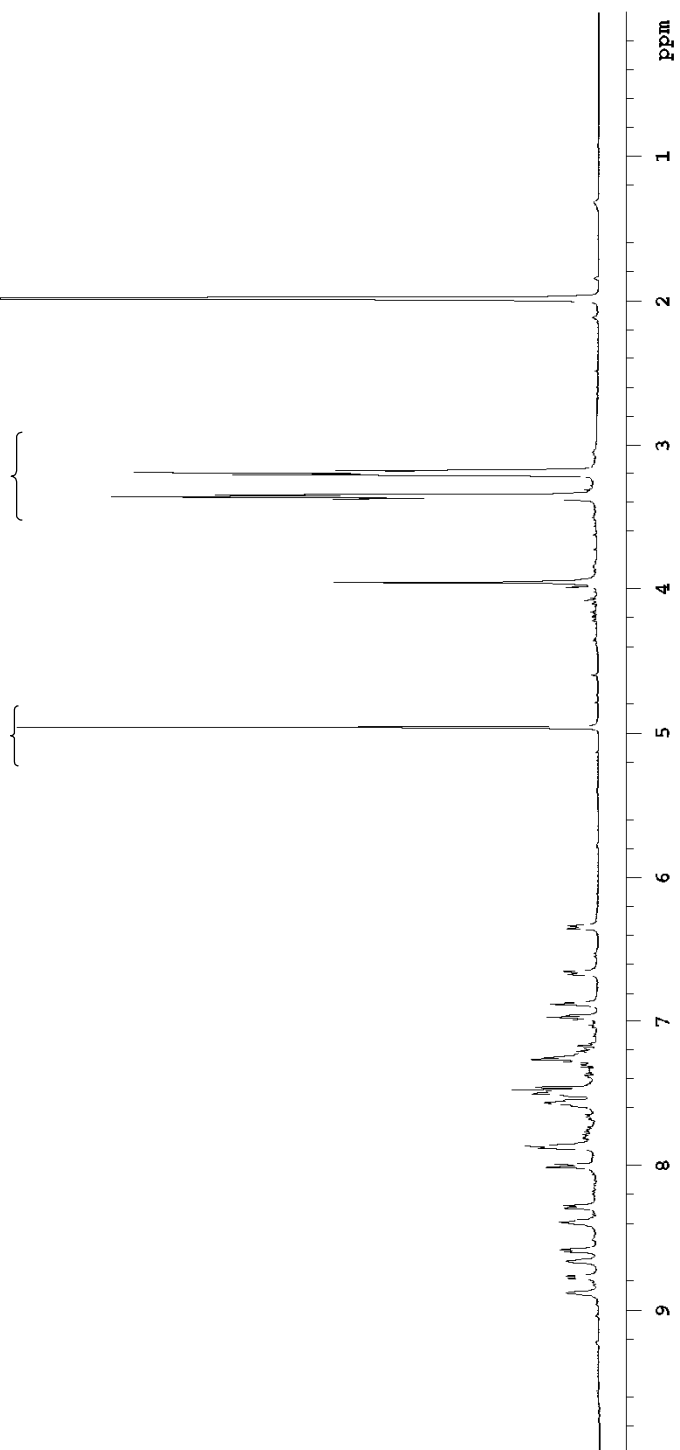



$^1\text{H}$  NMR ( $\text{CDCl}_3$ , 23 °C) of S53

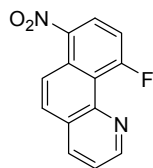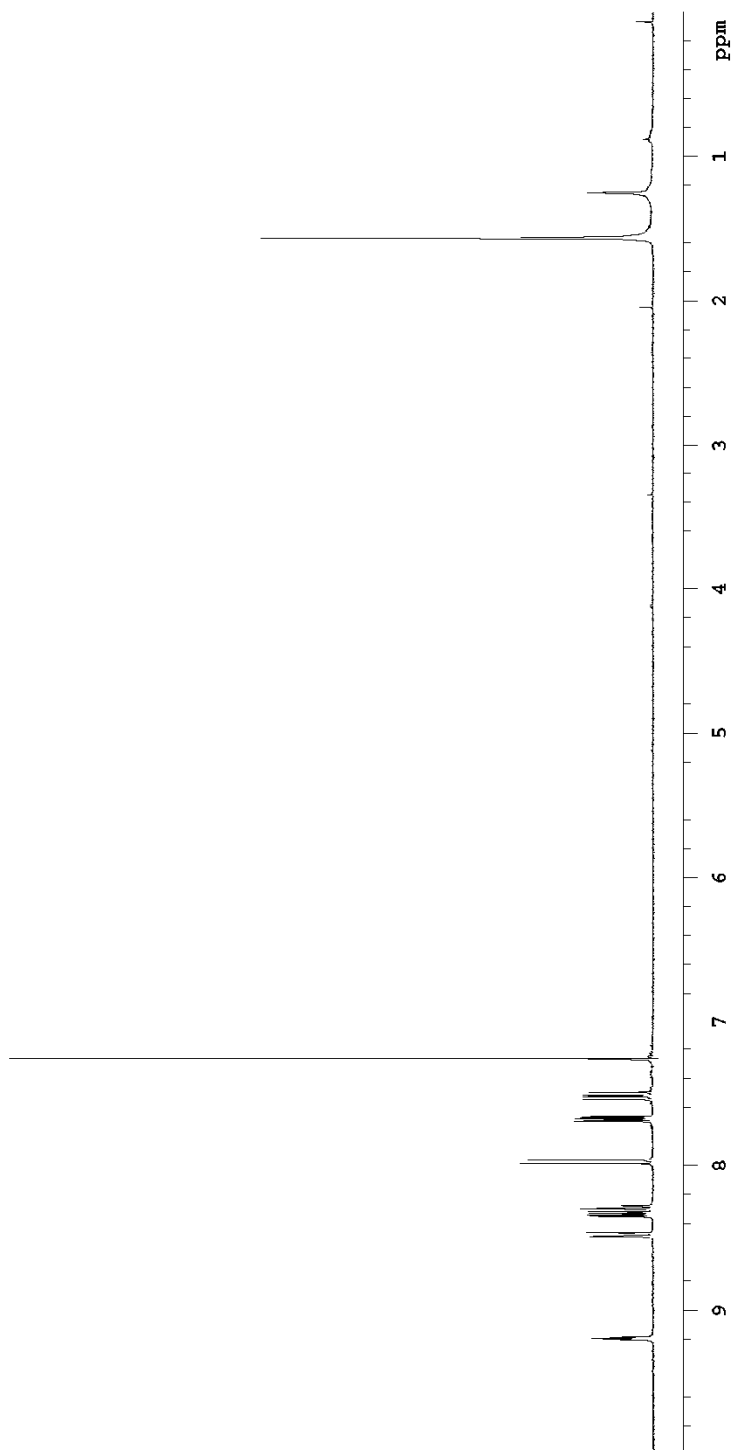

$^{13}\text{C}$  NMR ( $\text{CDCl}_3$ , 23 °C) of S53

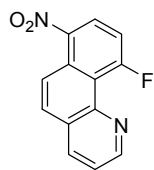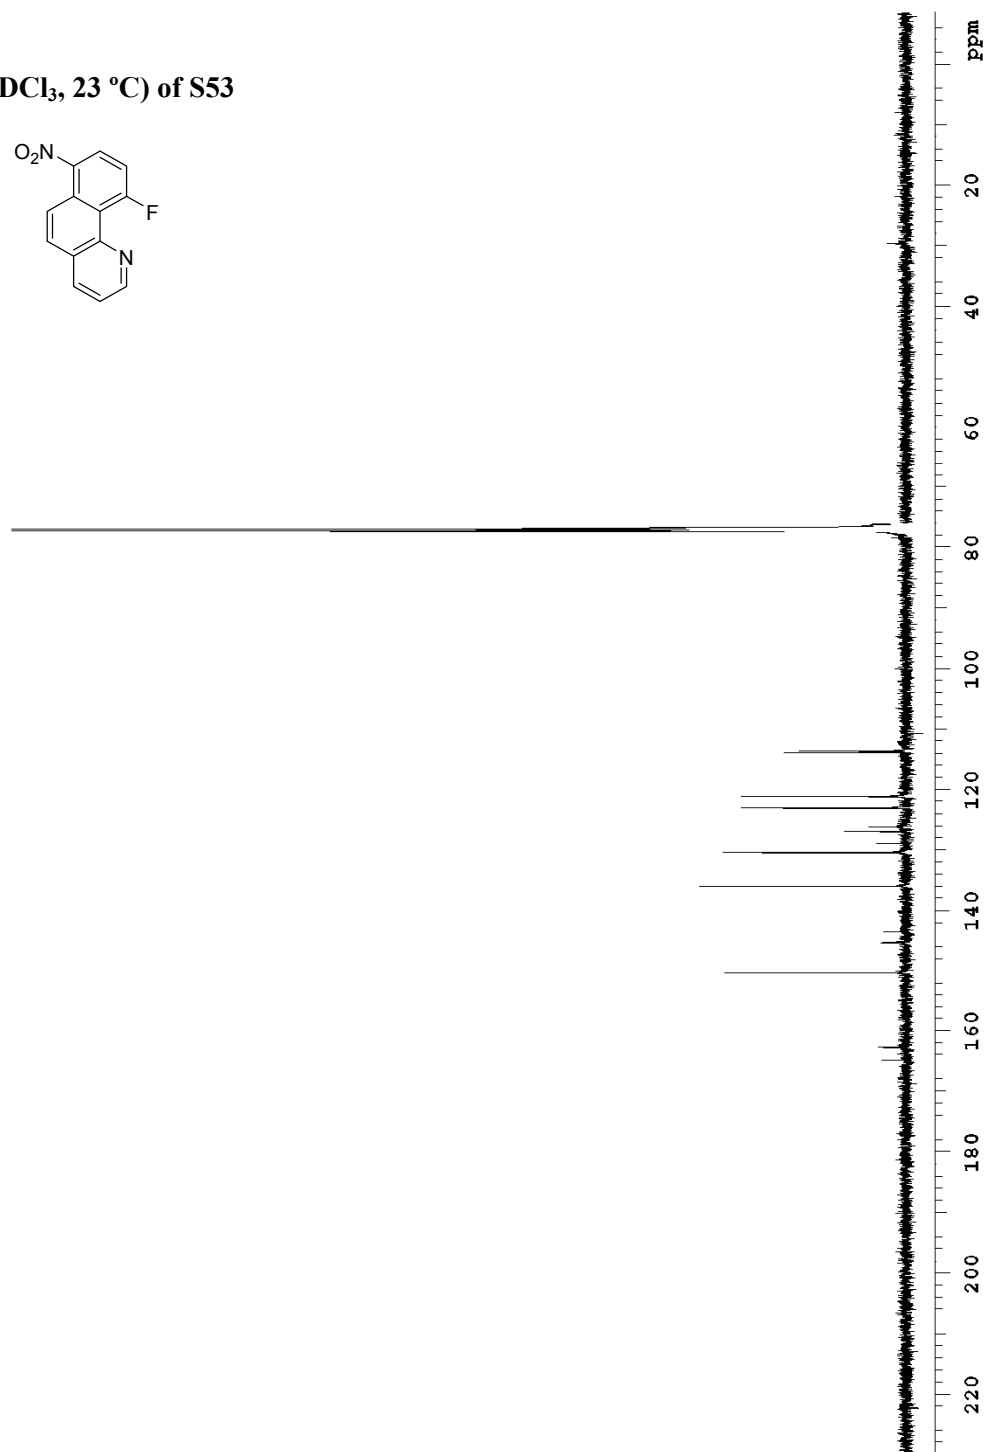

$^1\text{H}$  NMR ( $\text{CDCl}_3$ , 23 °C) of S54

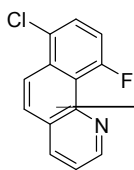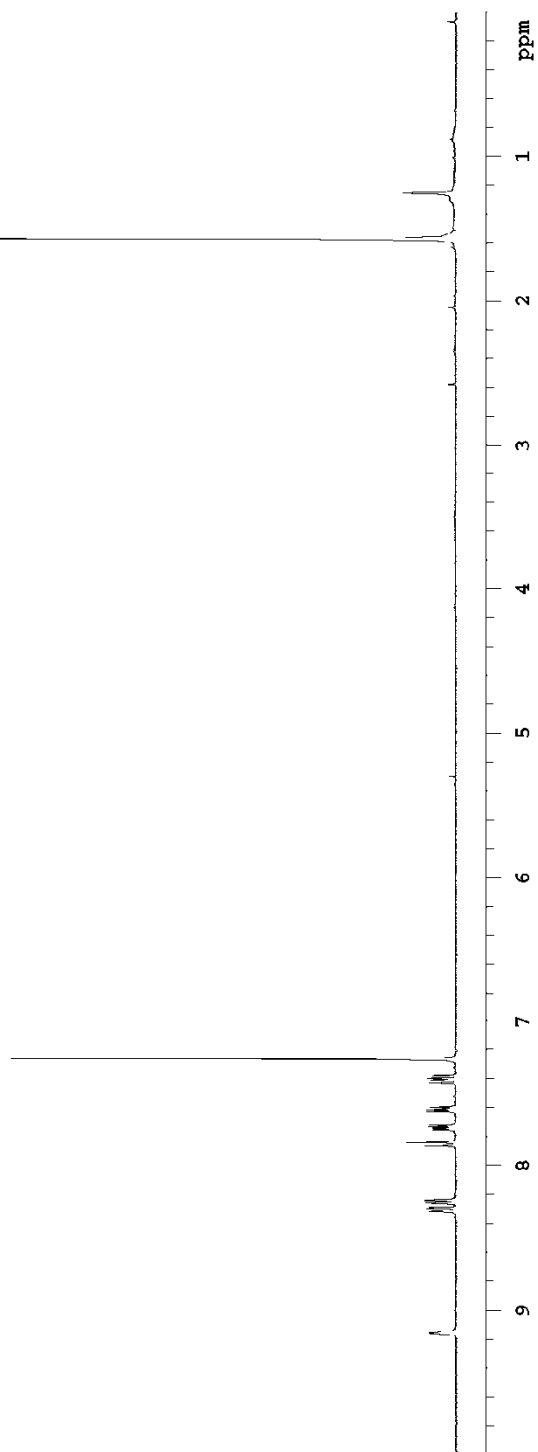

$^{13}\text{C}$  NMR ( $\text{CDCl}_3$ , 23 °C) of S54

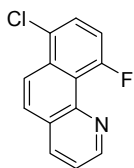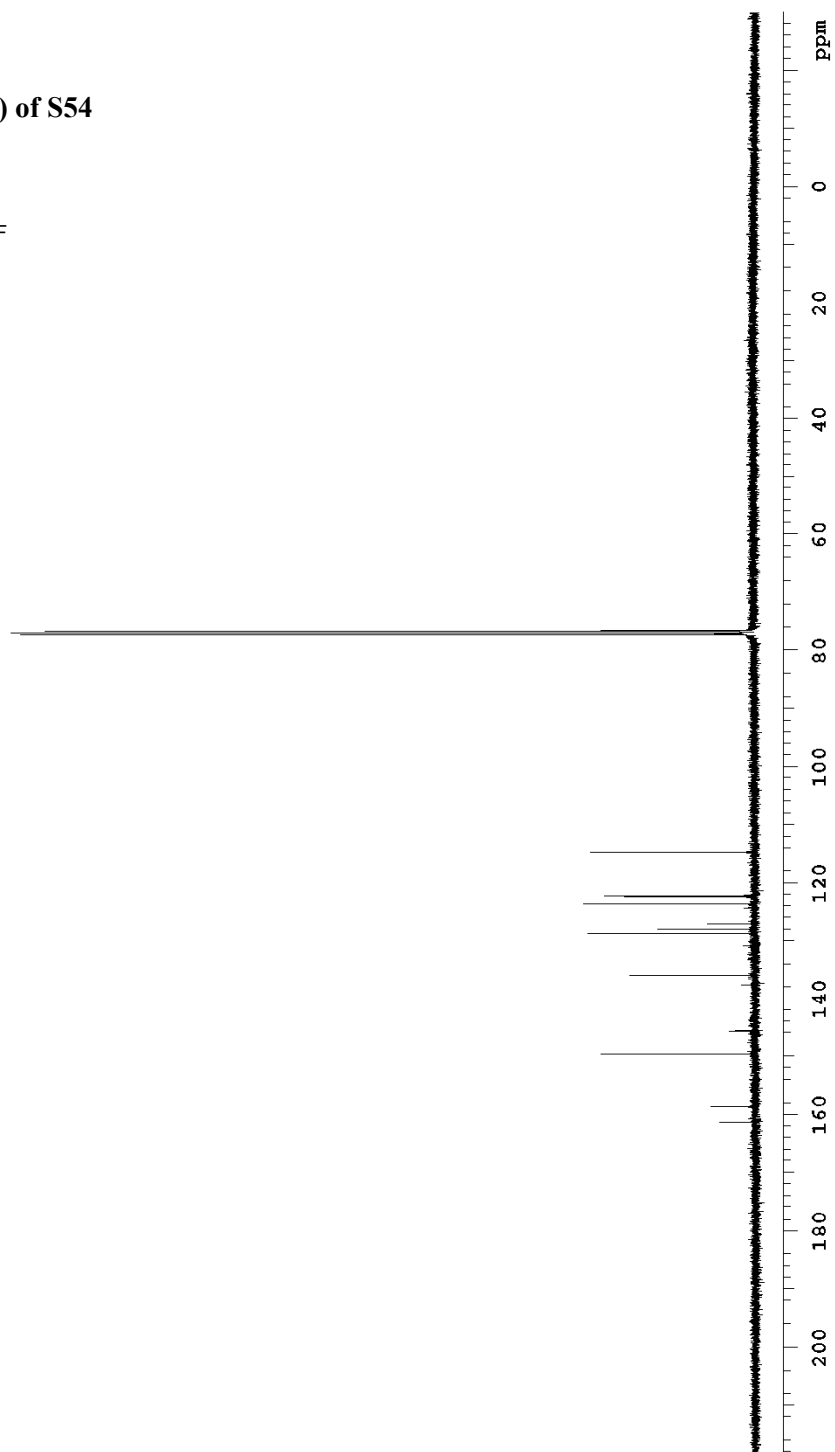

$^1\text{H}$  NMR ( $\text{CDCl}_3$ , 23 °C) of S55

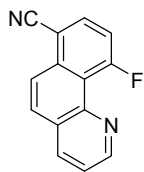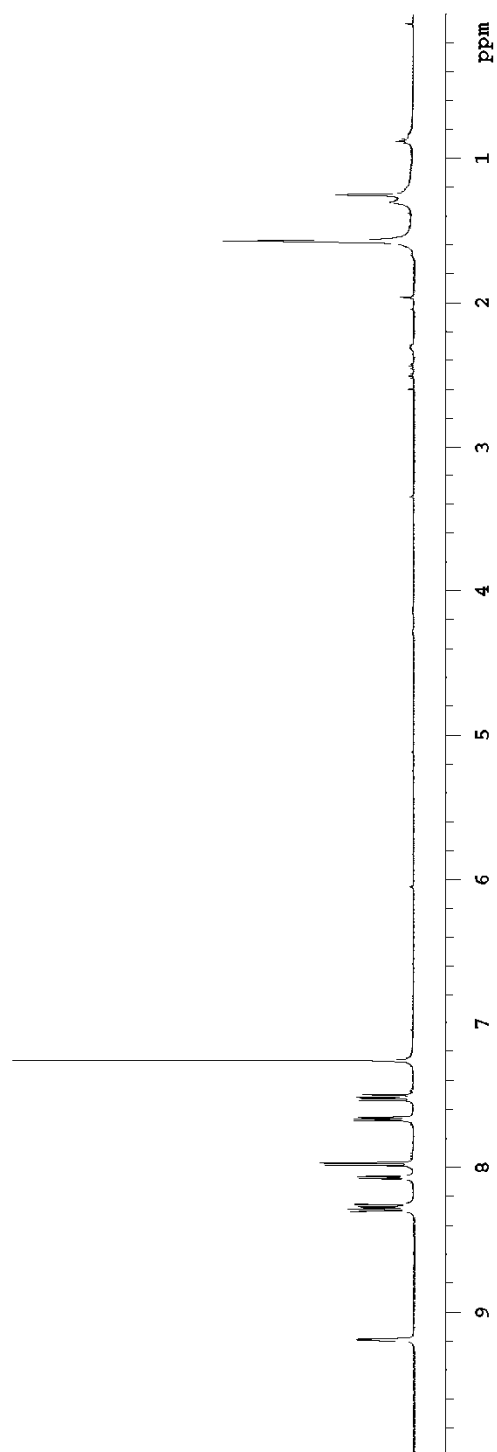

$^{13}\text{C}$  NMR ( $\text{CDCl}_3$ , 23 °C) of S55

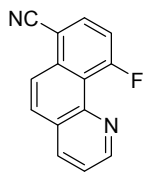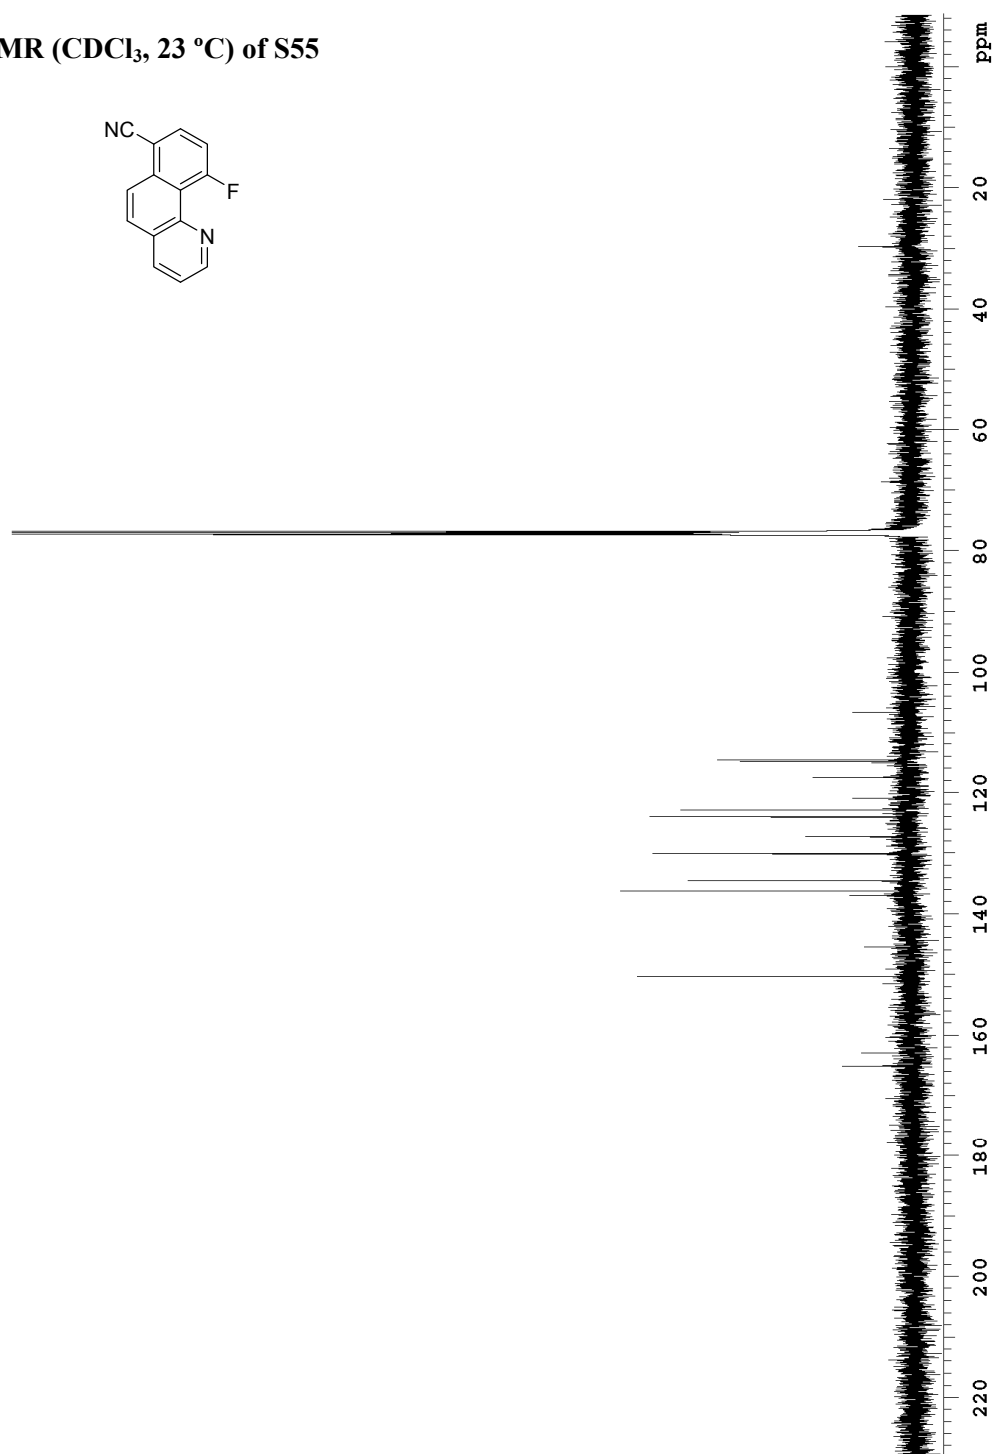

$^1\text{H}$  NMR ( $\text{CDCl}_3$ , 23 °C) of S56

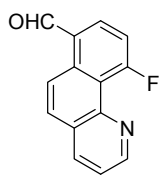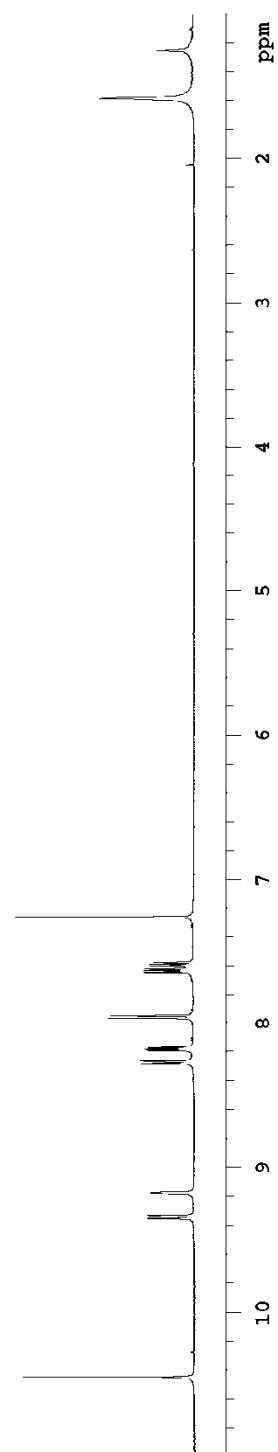

$^{13}\text{C}$  NMR ( $\text{CDCl}_3$ , 23 °C) of S56

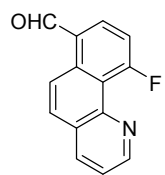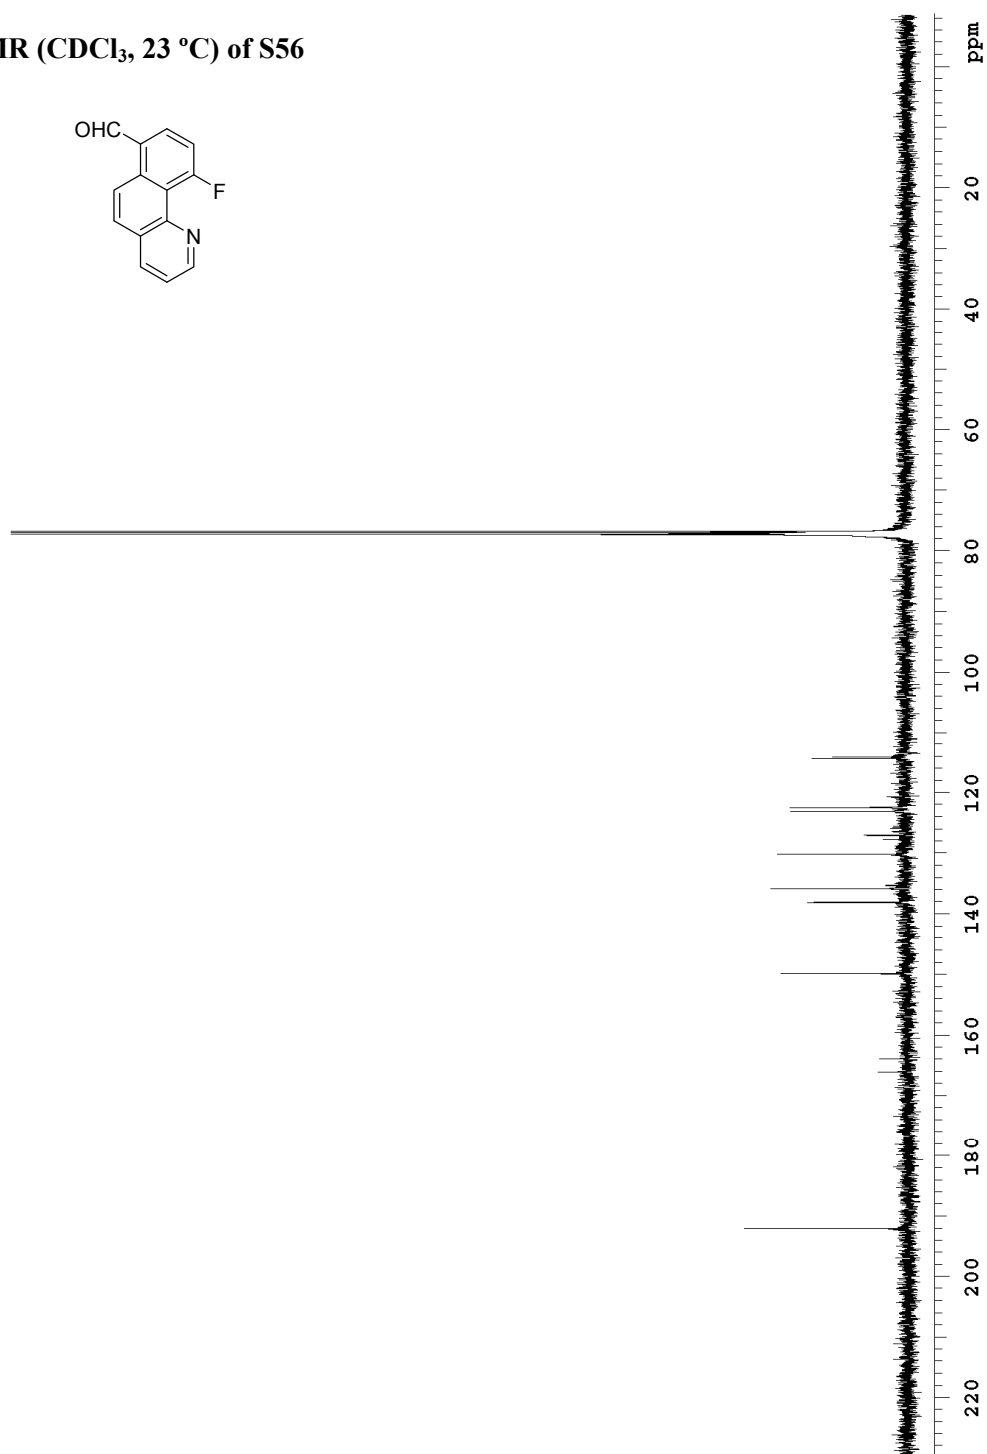



$^1\text{H NMR}$  ( $\text{CDCl}_3$ , 23 °C) of S57

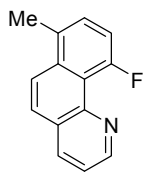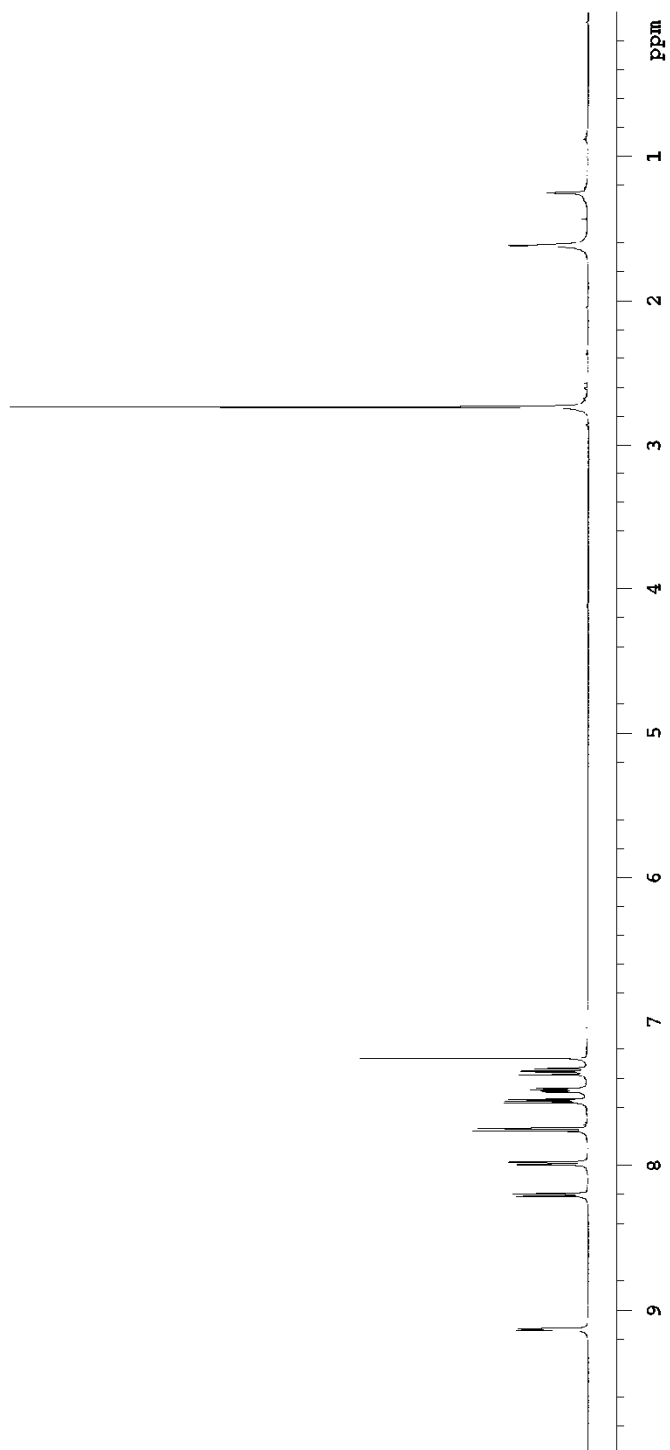

$^{13}\text{C}$  NMR ( $\text{CDCl}_3$ , 23 °C) of S57

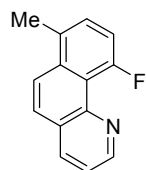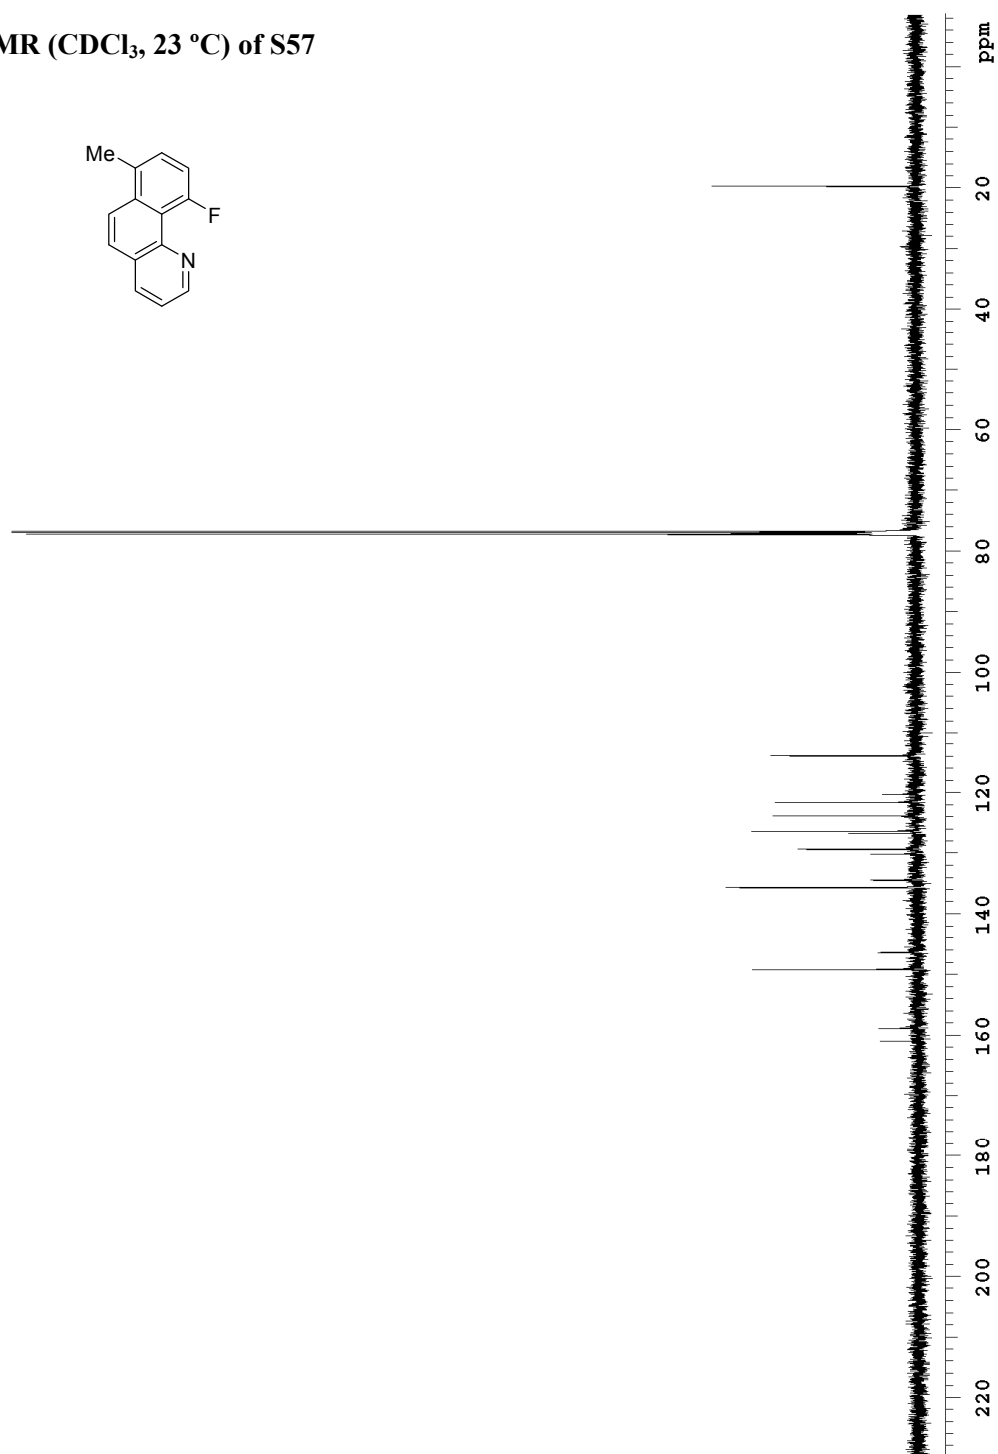

$^1\text{H}$  NMR ( $\text{CDCl}_3$ , 23 °C) of S58

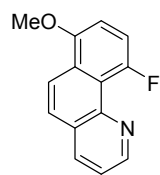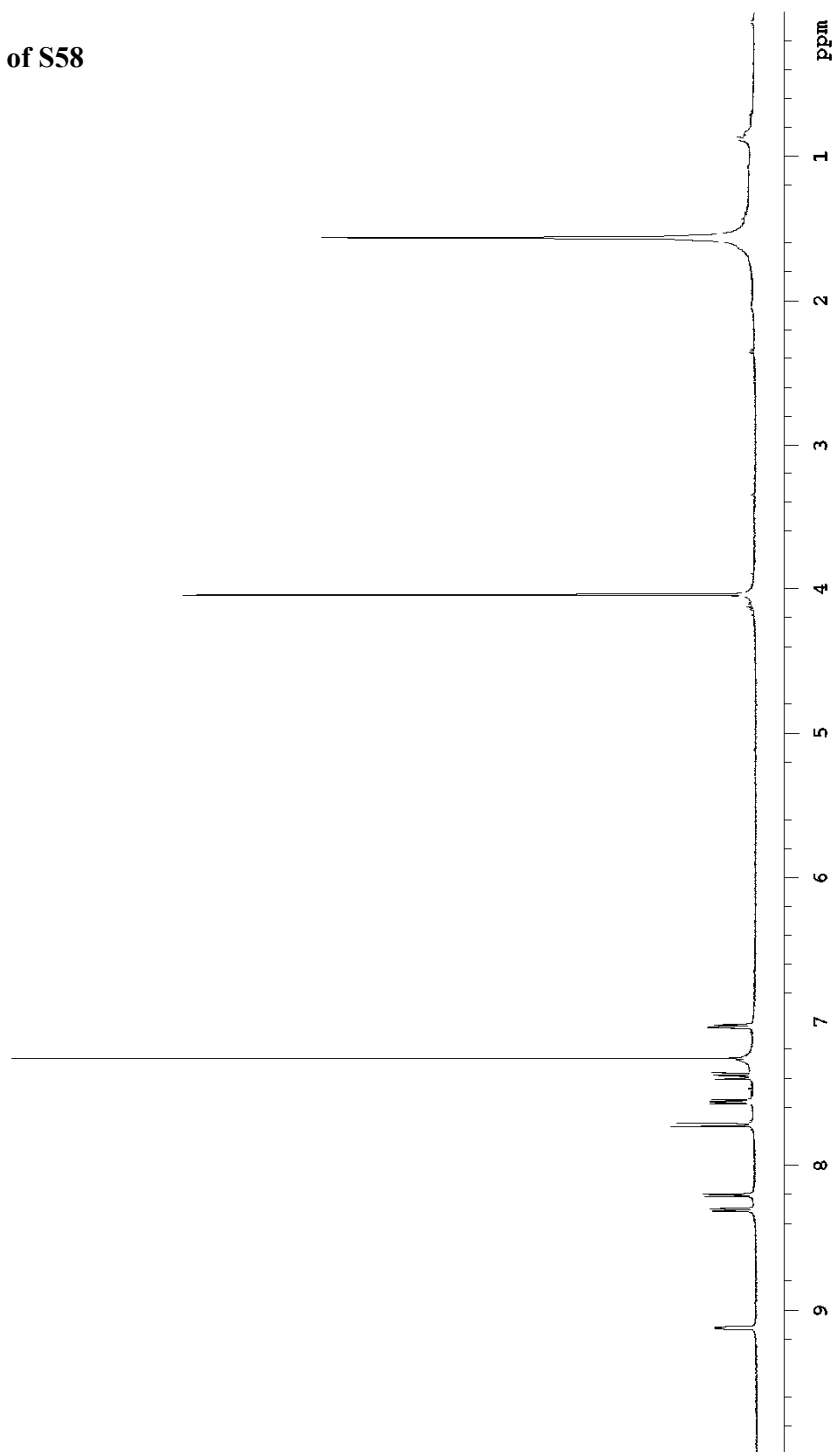

$^{13}\text{C}$  NMR ( $\text{CDCl}_3$ , 23 °C) of S58

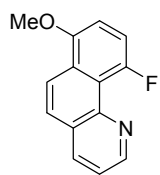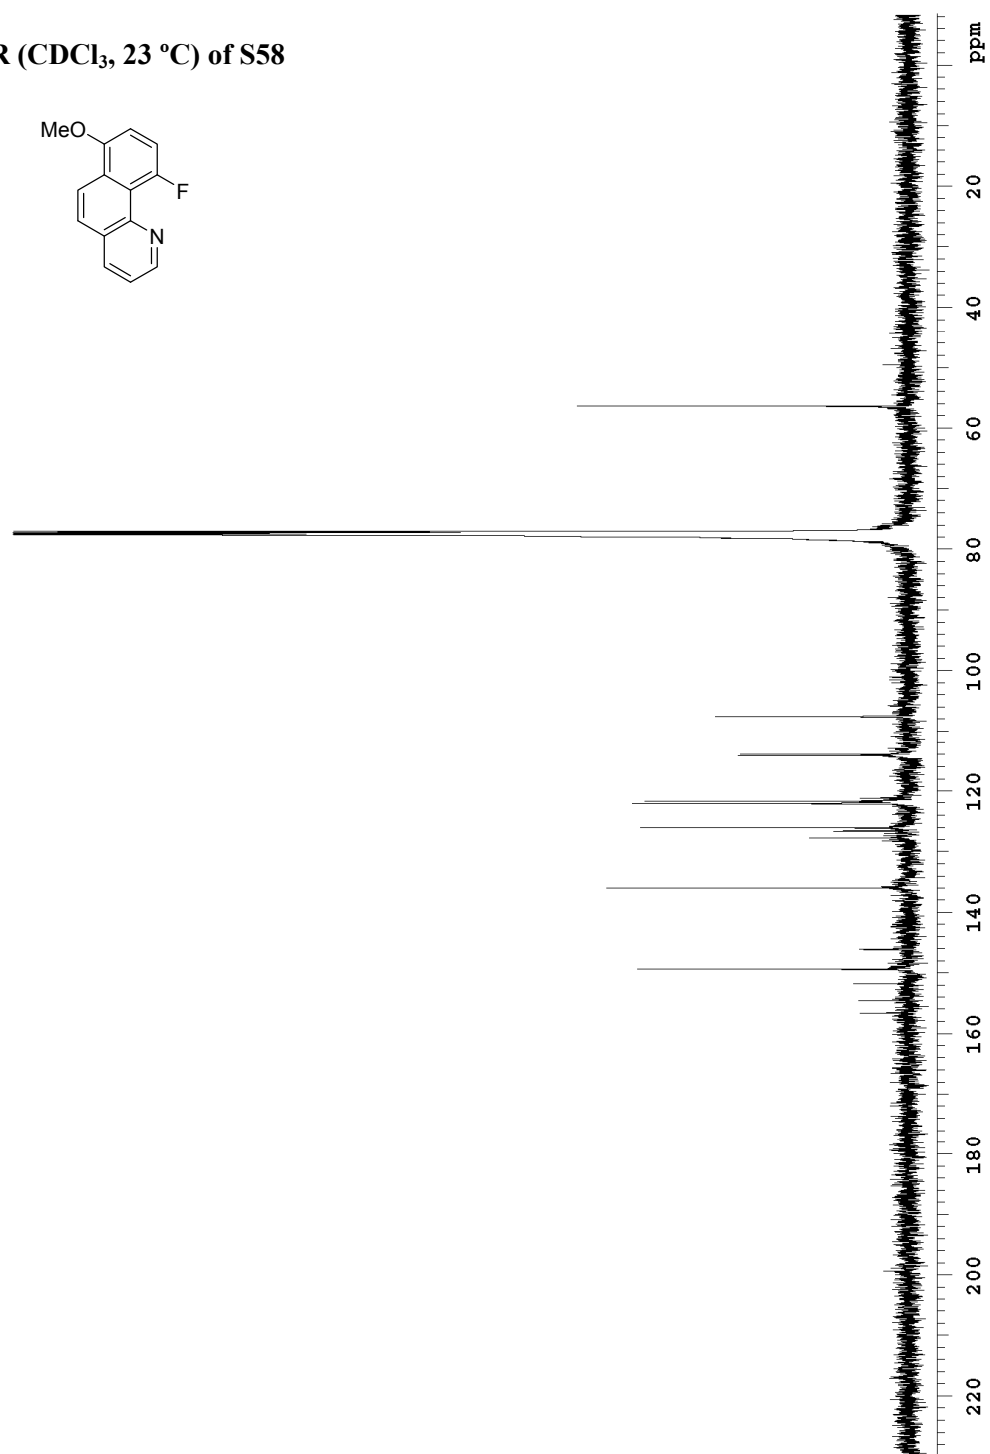

$^1\text{H}$  NMR ( $\text{CDCl}_3$ , 23 °C) of S59

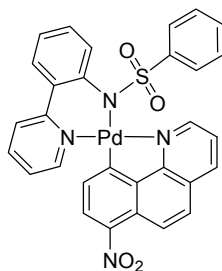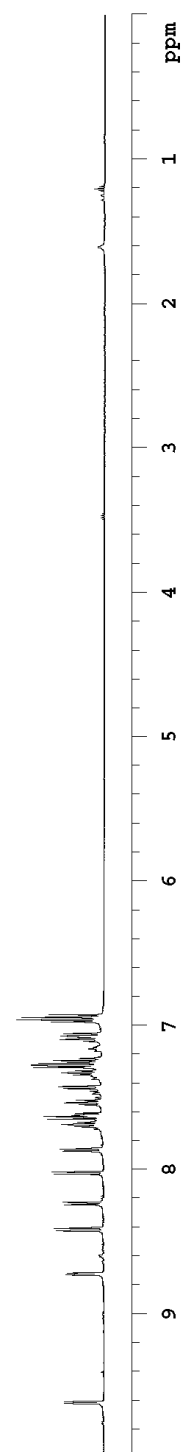

$^{13}\text{C}$  NMR ( $\text{CDCl}_3$ , 23 °C) of S59

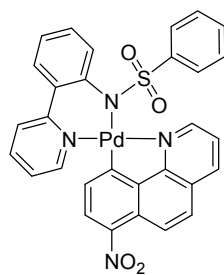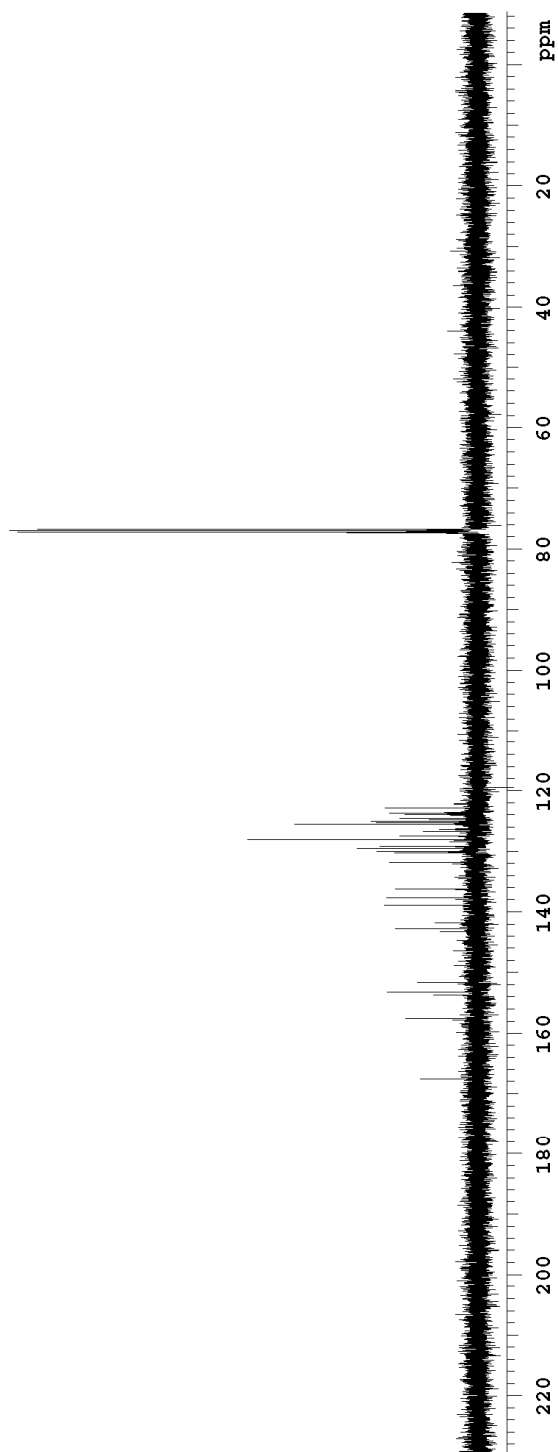

$^1\text{H}$  NMR ( $\text{CDCl}_3$ , 23 °C) of S60

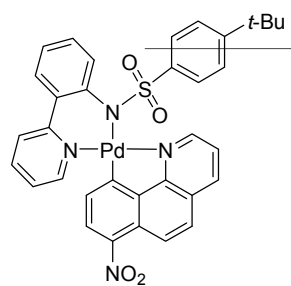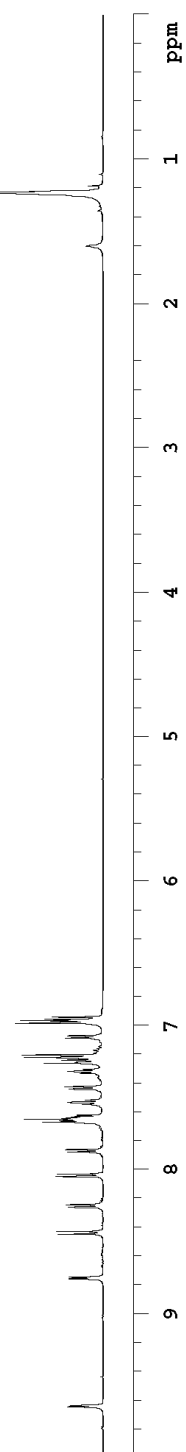

$^{13}\text{C}$  NMR ( $\text{CDCl}_3$ , 23 °C) of S60

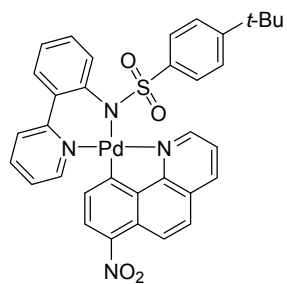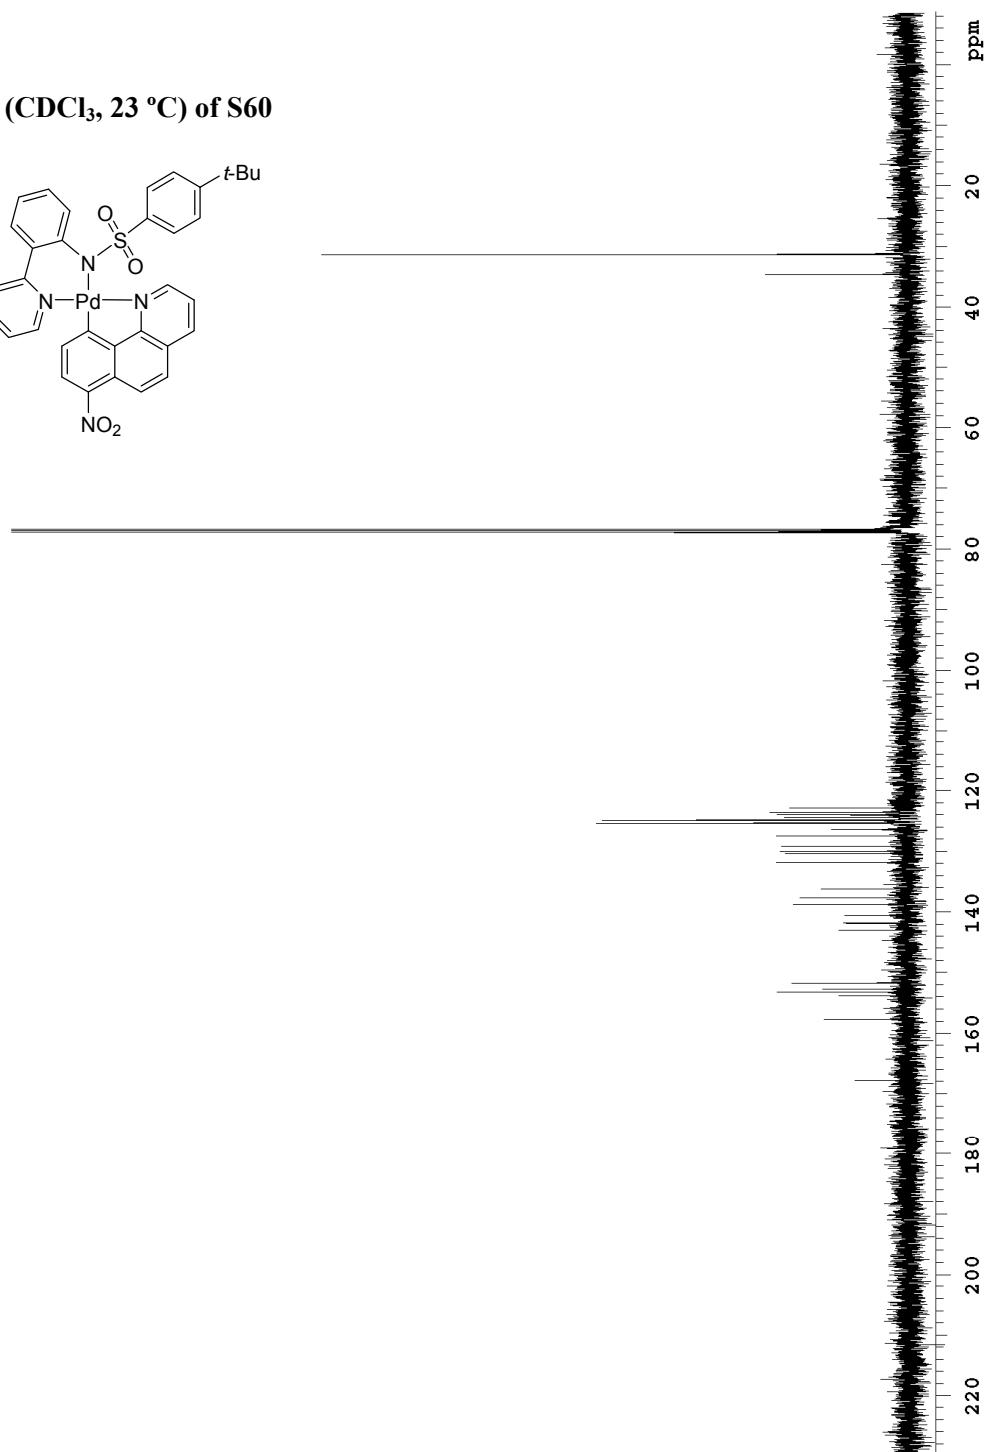



$^1\text{H}$  NMR ( $\text{CDCl}_3$ , 23 °C) of S61

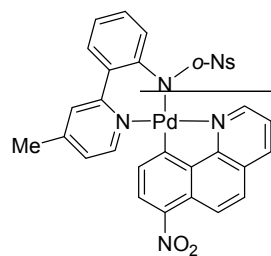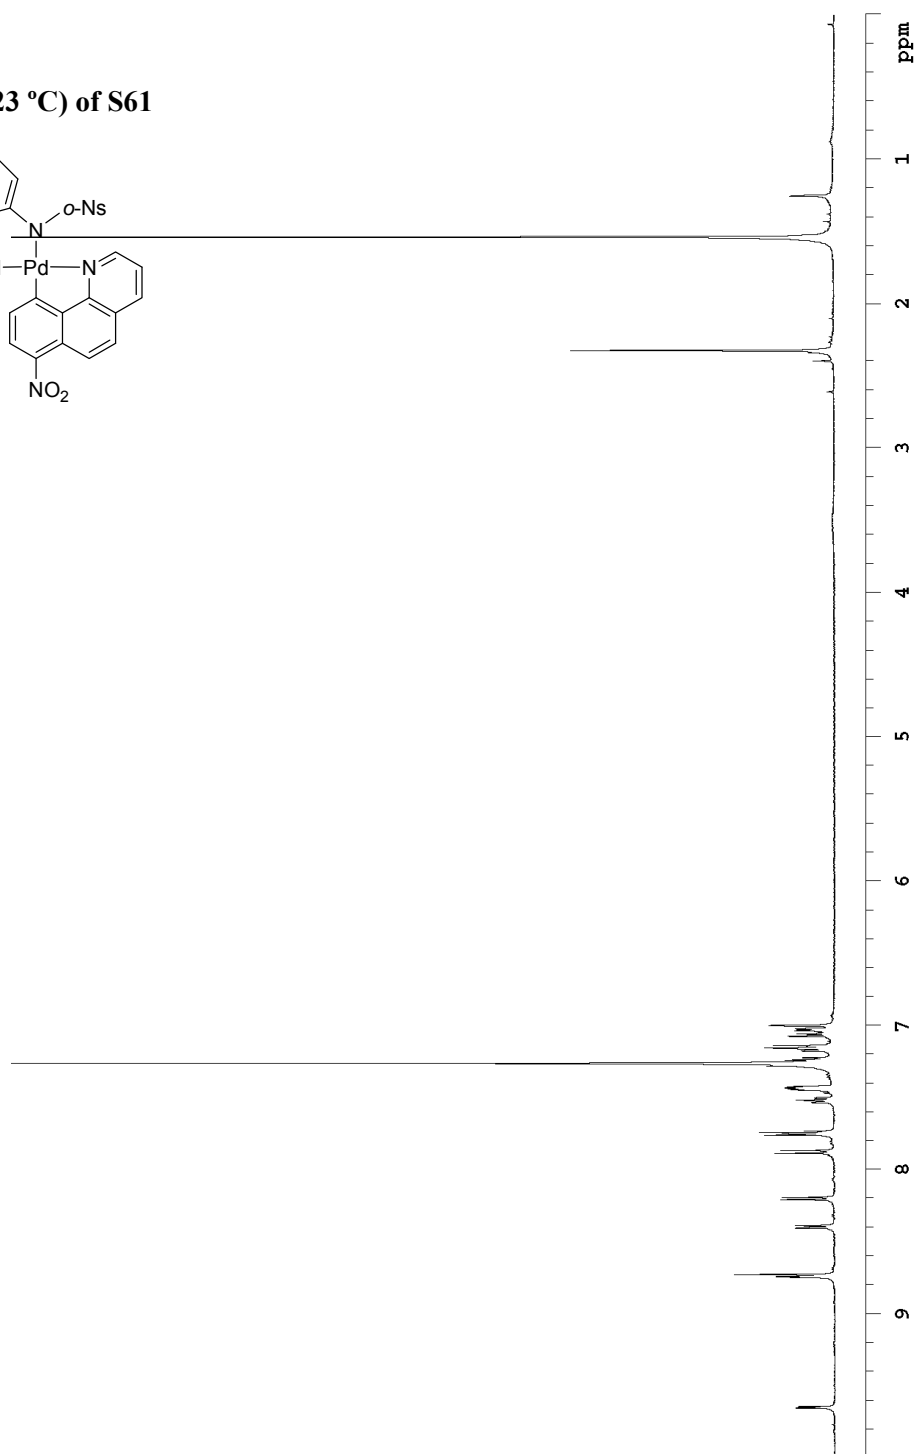

$^1\text{H}$  NMR (acetonitrile- $d_3$ , 23 °C) of S62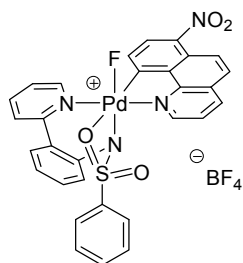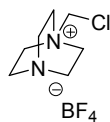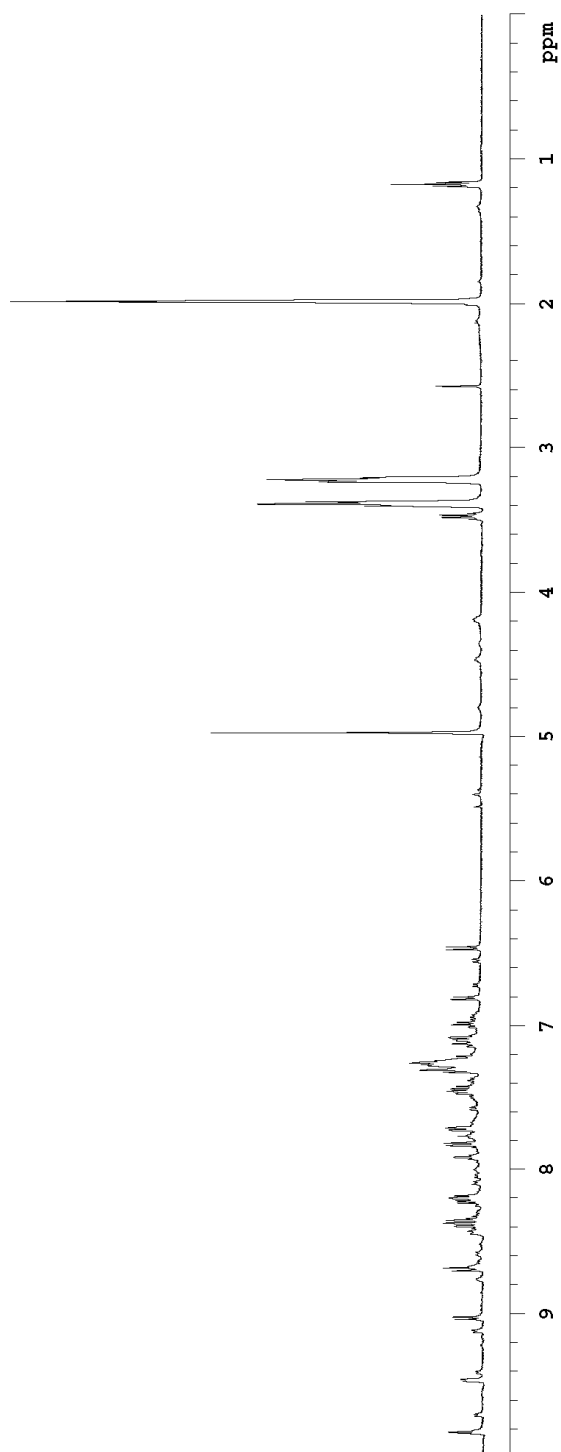

$^1\text{H}$  NMR (acetonitrile- $d_3$ , 23 °C) of S63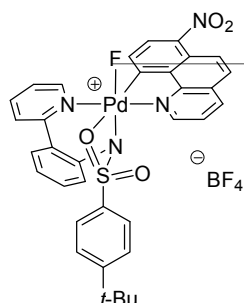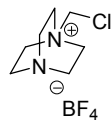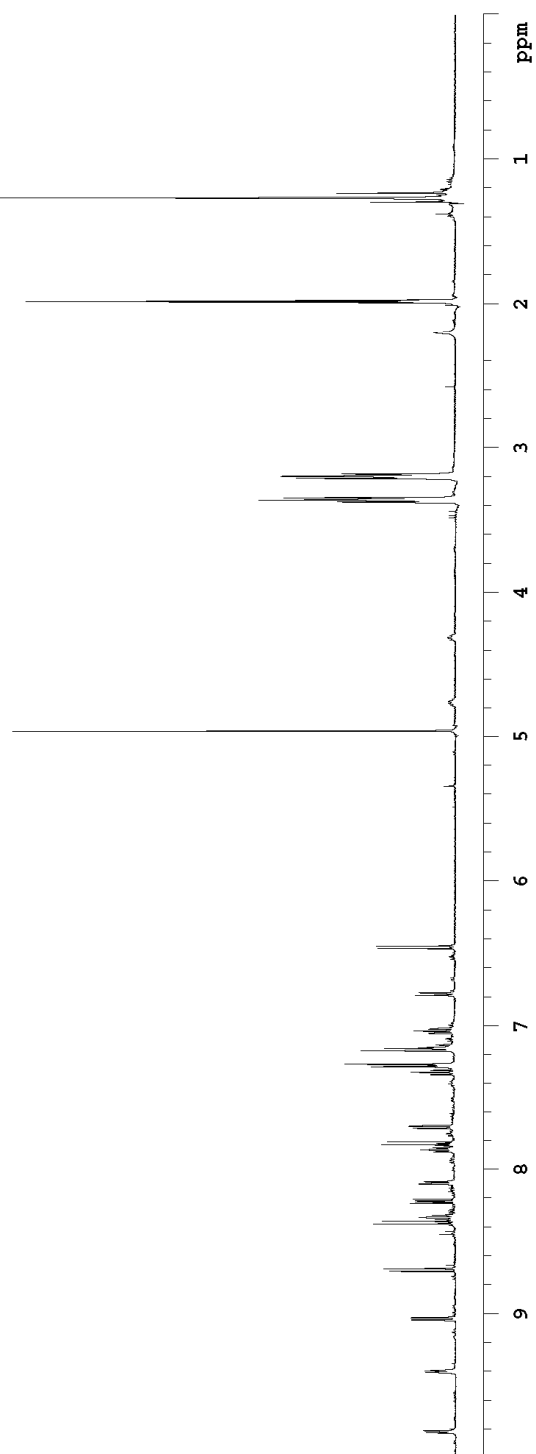

$^1\text{H}$  NMR (acetonitrile- $d_3$ , 23 °C) of S64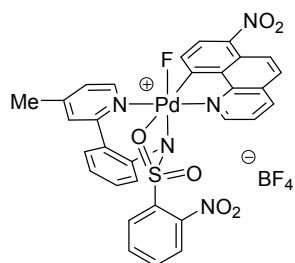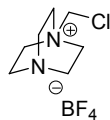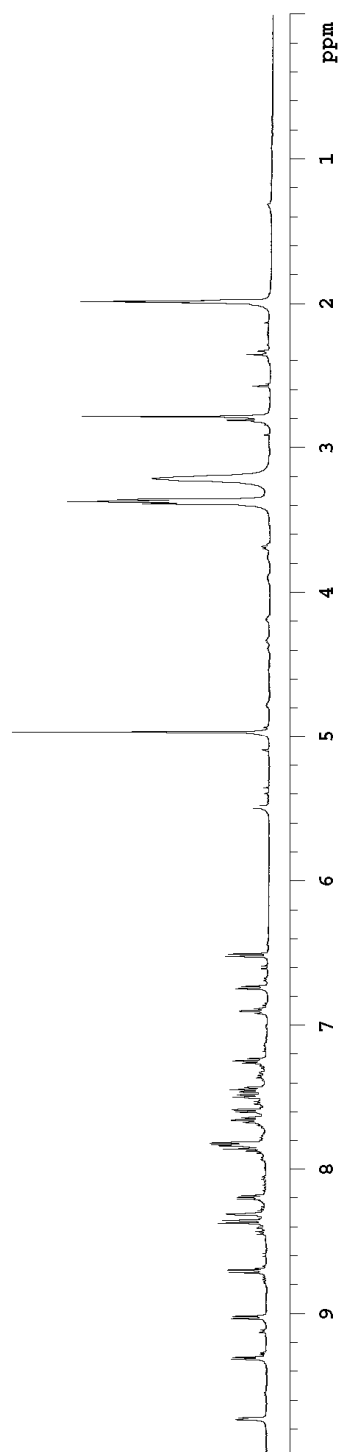

$^1\text{H}$  NMR ( $\text{CDCl}_3$ , 23  $^\circ\text{C}$ ) of 12

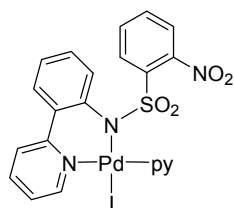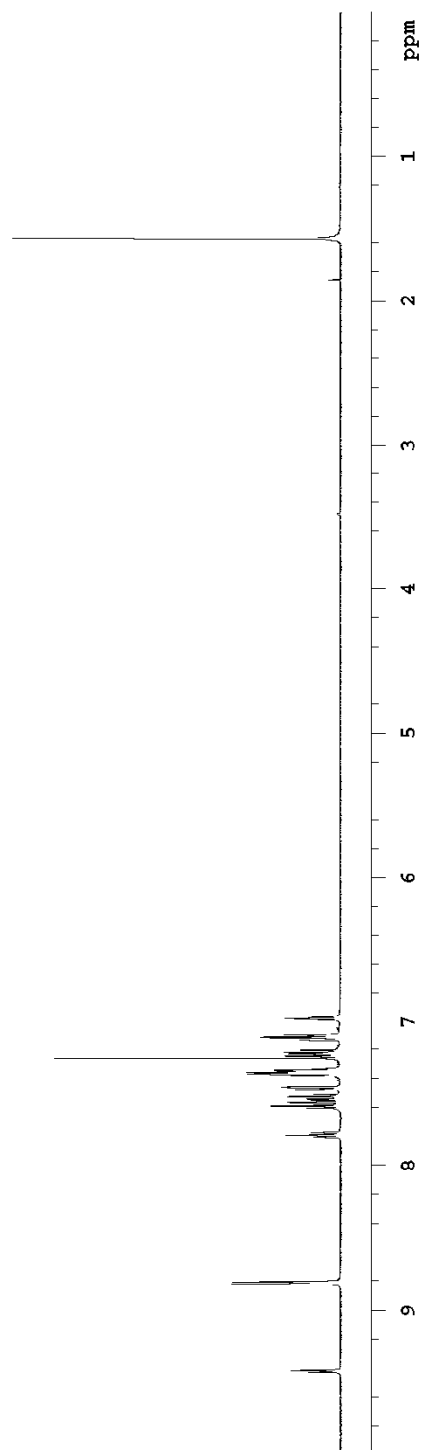

$^{13}\text{C}$  NMR ( $\text{CDCl}_3$ , 23 °C) of 12

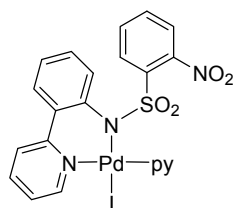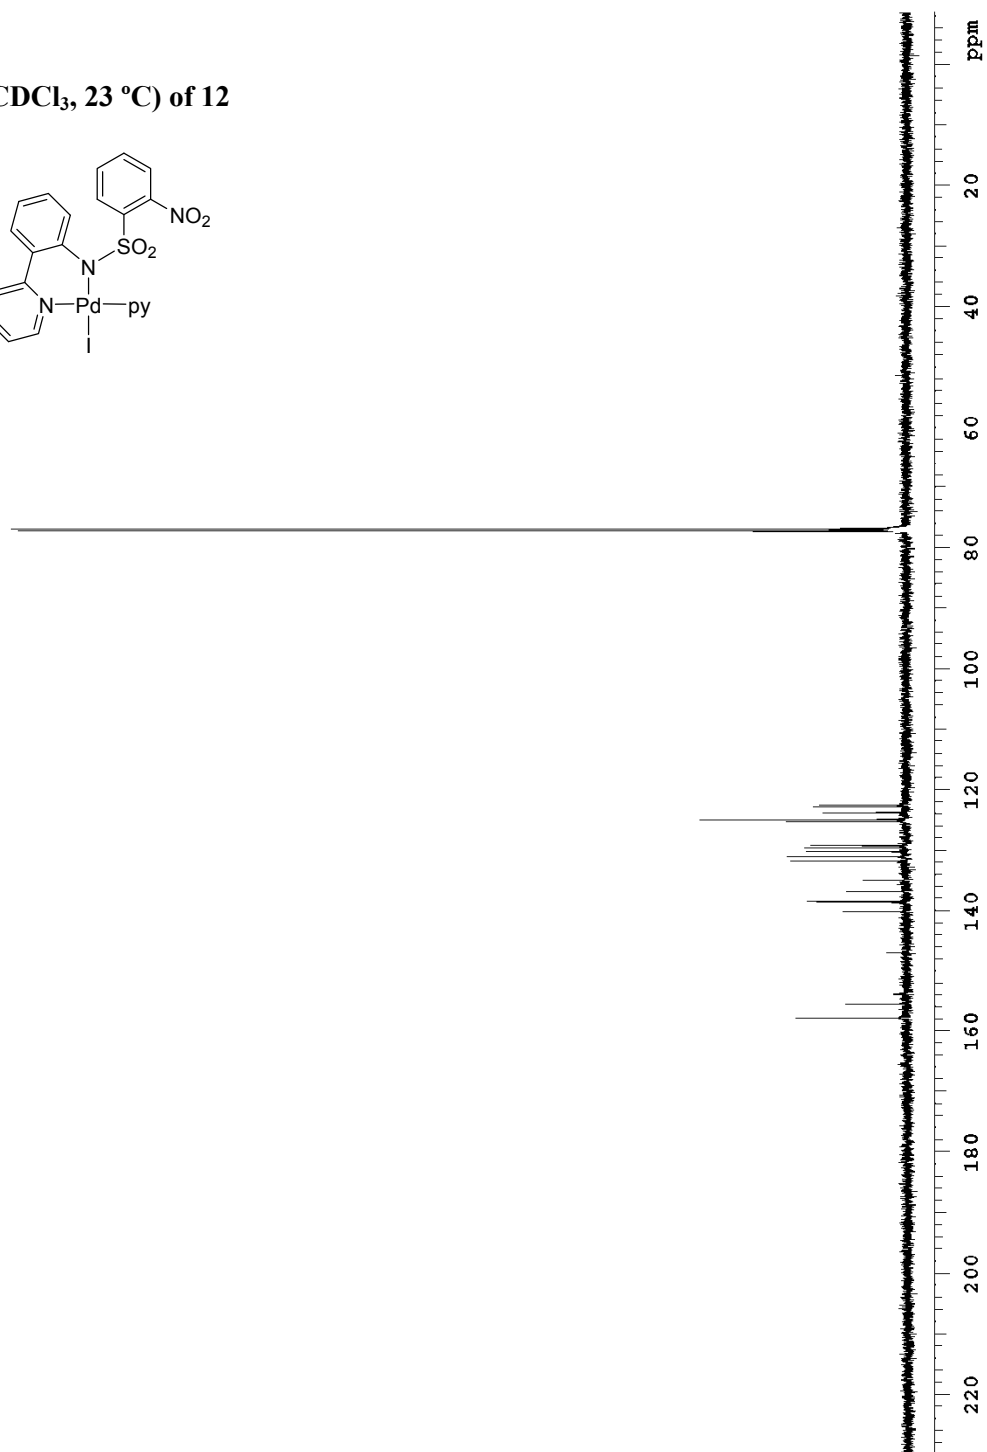

$^1\text{H}$  NMR ( $\text{CDCl}_3$ , 23 °C) of 11

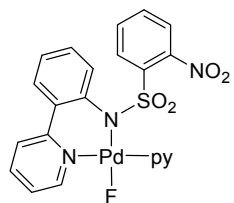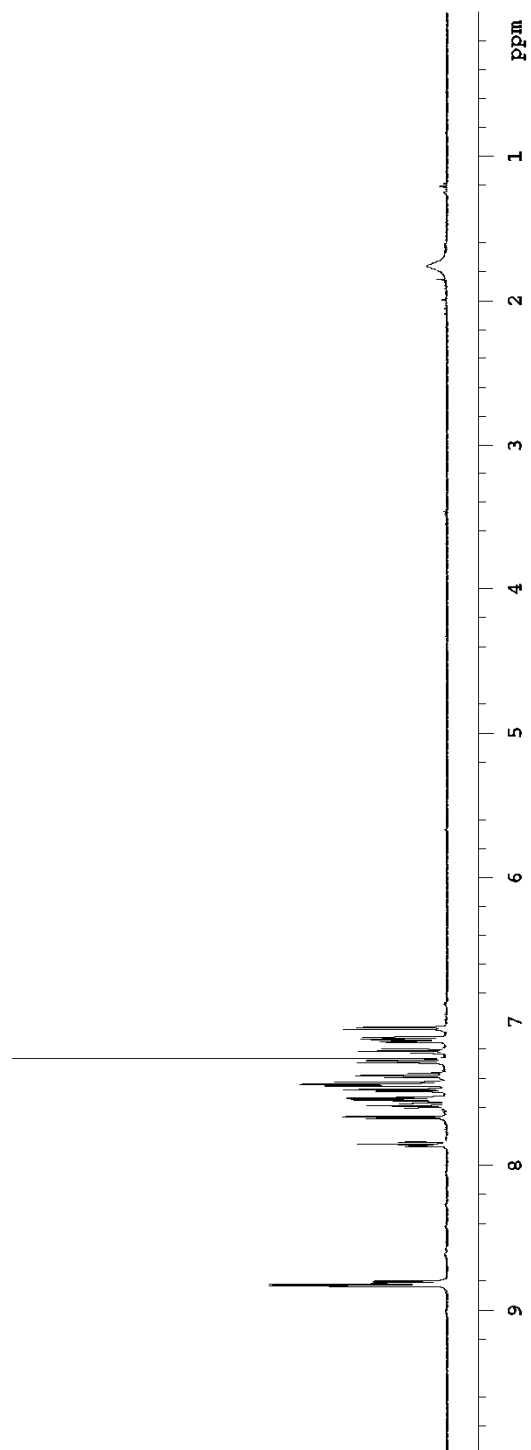

$^{13}\text{C}$  NMR ( $\text{CDCl}_3$ , 23 °C) of 11

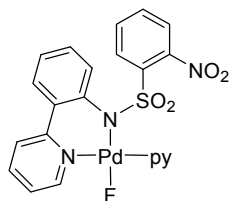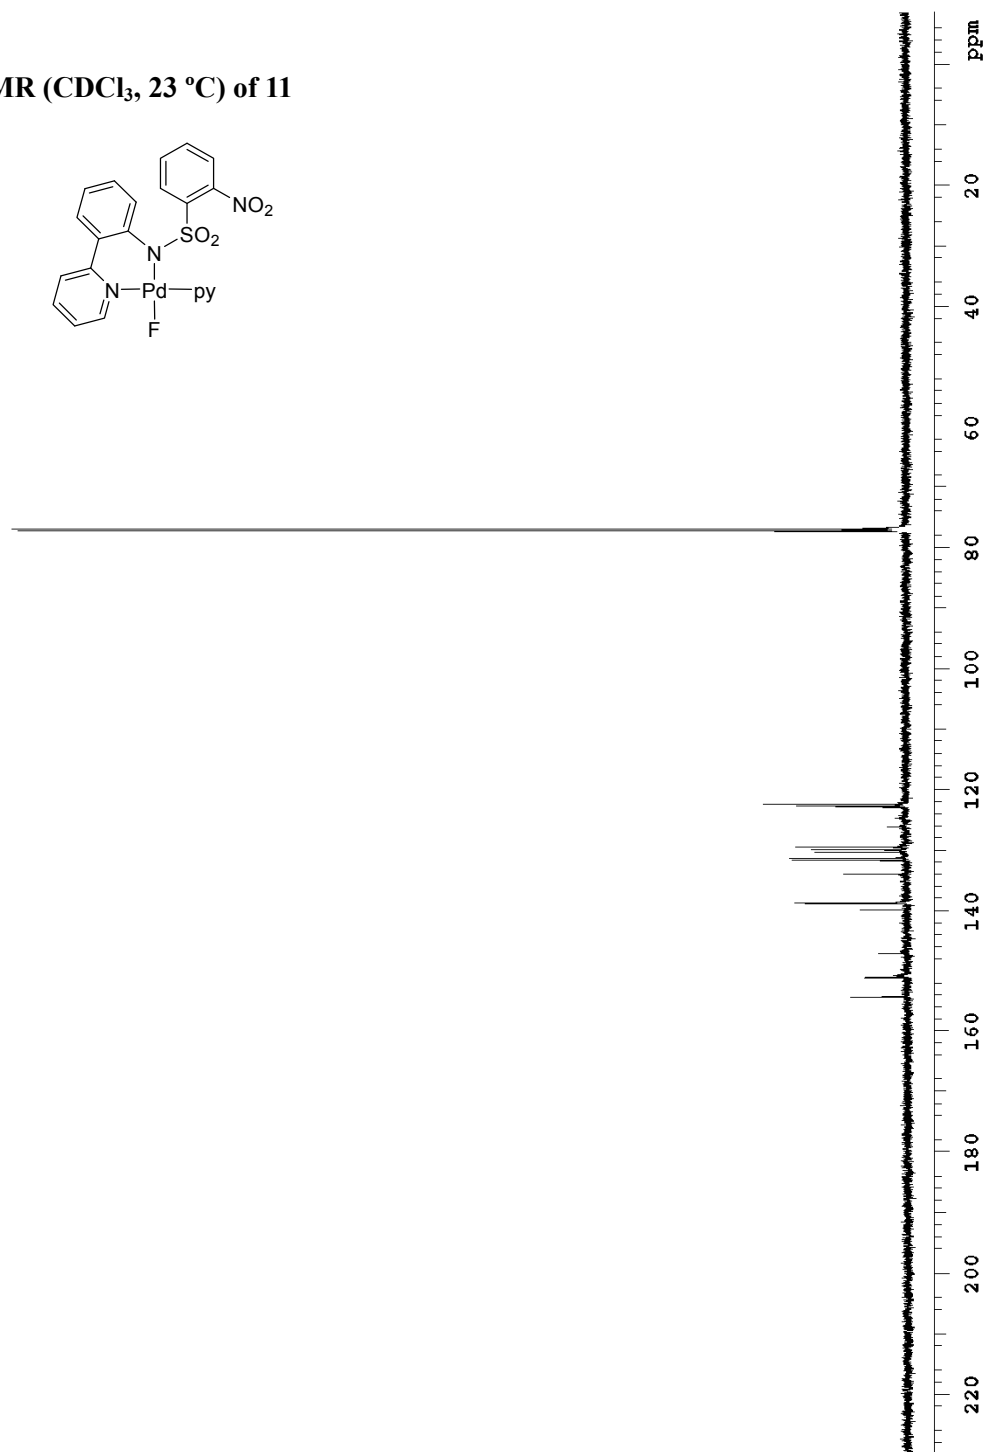

Supplement: NIHMS184744-supplement-1_si_001.pdf [file NIHMS184744-supplement-1_si_001.pdf]
